# Supplementary material for: Dedicated chaperones coordinate co-translational regulation of ribosomal protein production with ribosome assembly to preserve proteostasis
Source: eLife. 2022 Mar 31;11:e74255. doi: 10.7554/eLife.74255 (PMC8970588; doi:10.7554/eLife.74255)
Supplement: Supplementary file 1. [file elife-74255-supp1.xlsx]

## Sheet: strains
name	mating type	genotype	plasmid	source	used in figure / used for creation of / used for
YBP322	α	WT	YCplac33-ACL4 (pBP243)	this study	F1A
YBP319	a	caf130::HIS3MX4	YCplac33-ACL4 (pBP243)	this study	F1A
YBP320	α	acl4::natNT2	YCplac33-ACL4 (pBP243)	this study	F1A, F1-S1A, F6
YBP321	a	caf130::HIS3MX4 acl4::natNT2	YCplac33-ACL4 (pBP243)	this study	F1A
YBP376	a	WT	YCplac33-ACL4 (pBP243)	this study	F1B
YBP379	α	cal4::HIS3MX4	YCplac33-ACL4 (pBP243)	this study	F1B
YBP377	a	acl4::natNT2	YCplac33-ACL4 (pBP243)	this study	F1B
YBP378	α	cal4::HIS3MX4 acl4::natNT2	YCplac33-ACL4 (pBP243)	this study	F1B
YBP643	a	WT	YCplac33-ACL4 (pBP243)	this study	F1C, F1G
YBP642	α	btt1::HIS3MX4		this study	F1C
YBP641	α	acl4::natNT2	YCplac33-ACL4 (pBP243)	this study	F1C
YBP640	a	btt1::HIS3MX4 acl4::natNT2	YCplac33-ACL4 (pBP243)	this study	F1C
YBP654	α	WT	YCplac33-ACL4 (pBP243)	this study	F1D
YBP653	a	egd1::HIS3MX4	YCplac33-ACL4 (pBP243)	this study	F1D
YBP652	α	acl4::natNT2	YCplac33-ACL4 (pBP243)	this study	F1D
YBP651	a	egd1::HIS3MX4 acl4::natNT2	YCplac33-ACL4 (pBP243)	this study	F1D
YBP672-2C	a	acl4::natNT2		this study	F1E
YBP672-2A	a	egd1::HIS3MX4 acl4::natNT2	YCplac33-ACL4 (pBP243)	this study	F1E
YBP672-2D	α	btt1::HIS3MX4 acl4::natNT2	YCplac33-ACL4 (pBP243)	this study	F1E
YBP672-2B (YBP710)	α	egd1::HIS3MX4 btt1::HIS3MX4 acl4::natNT2		this study	F1E
YBP669	a	WT		this study	F1F, F1G, F1H, F1-S1D, F1-S2, F4D, F4E, F4-S2, F5A, F5C, F6
YBP666	α	egd2::HIS3MX4	YCplac33-ACL4 (pBP243)	this study	F1F, F1G
YBP668	α	acl4::natNT2		this study	F1F, F1G
YBP667	a	egd2::HIS3MX4 acl4::natNT2	YCplac33-ACL4 (pBP243)	this study	F1F
YBP77	α	WT		this study	F1G, F1H, F1-S1D, F1-S2, F2C, F2-S1K, F4D, F4E, F4F, F4-S2, F5A, F5C, F5-S2B, F6
YBP787	a	WT		this study	F1G, F1H, F1-S1D, F4D, F4E, F4F, F4-S2, F5A, F5C, F6
YBP251	α	caf130::natNT2		this study	F1G, F1H, F1-S2, F4D, F4E, F4F, F5A, F5C
YBP252	a	caf130::natNT2		this study	F1G, F1H, F1-S2, F4D, F4E, F4F
YBP253	α	caf130::HIS3MX4		this study	F1G, F1H, F1-S2, F4D
YBP301	a	cal4::natNT2		this study	F1G, F1H
YBP302	α	cal4::natNT2		this study	F1G, F1H
YBP303	a	cal4::HIS3MX4		this study	F1G, F1H
YBP605	α	btt1::natNT2		this study	F1G, F1-S1D
YBP607	α	btt1::HIS3MX4		this study	F1G, F1-S1D
YBP609	a	egd1::natNT2		this study	F1G, F1-S1D
YBP610	α	egd1::natNT2		this study	F1G, F1-S1D
YBP612	a	egd1::HIS3MX4		this study	F1G, F1-S1D
YBP624	a	egd2::HIS3MX4		this study	F1G, F1-S1D
YBP662	α	egd2::HIS3MX4		this study	F1G, F1-S1D
YBP674	α	btt1::natNT2 egd1::HIS3MX4		this study	F1G, F1-S1D
YBP675	α	btt1::natNT2 egd1::HIS3MX4		this study	F1G, F1-S1D
YBP676	a	btt1::HIS3MX4 egd1::natNT2		this study	F1G, F1-S1D
YBP255	a	acl4::natNT2	YCplac33-ACL4 (pBP243)	this study	F1G, F1-S1D, F6
YKL701	a	acl4::HIS3MX4		Pillet et al., 2015; PMID: 26447800	F1G, F1-S1D
YBP671-1C	α	WT		this study	F1-S1B
YBP671-1B	a	btt1::natNT2		this study	F1-S1B
YBP671-1D	α	egd1::HIS3MX4		this study	F1-S1B
YBP671-1A (YBP676)	a	btt1::HIS3MX4 egd1::natNT2		this study	F1-S1B
YBP1368	α	WT	YCplac33-ACL4 (pBP243)	this study	F1-S1C
YBP1369	a	zuo1::HIS3MX4	YCplac33-ACL4 (pBP243)	this study	F1-S1C
YBP1371	α	acl4::natNT2	YCplac33-ACL4 (pBP243)	this study	F1-S1C
YBP1370	a	zuo1::HIS3MX4 acl4::natNT2	YCplac33-ACL4 (pBP243)	this study	F1-S1C
YBP560	a	NOT1-TAP::natNT2		this study	F2B, F2-S1A, F3D
YBP536	α	not1::HIS3MX4	YCplac33-NOT1 (pBP571)	this study	F2B, F2C, F2E, F2-S1A
YBP1022	a	WT	YCplac33-ACL4 (pBP243)	this study	F2D
YBP1021	α	acl4::natNT2	YCplac33-ACL4 (pBP243)	this study	F2D
YBP619	a	not1::HIS3MX4 acl4::natNT2	YCplac33-ACL4 (pBP243) YCplac33-NOT1 (pBP571)	this study	F2D
YBP537	a	not1::HIS3MX4	YCplac33-NOT1 (pBP571)	this study	F2E
YBP538	a	not1::natNT2	YCplac33-NOT1 (pBP571)	this study	F2E
YBP428	diploid	NOT2/not2::HIS3MX4		this study	F2-S1B
YBP436	diploid	NOT5/not5::HIS3MX4		this study	F2-S1B
YBP784	α	WT	YCplac33-ACL4 (pBP243)	this study	F2-S1C
YBP782	a	caf40::HIS3MX4	YCplac33-ACL4 (pBP243)	this study	F2-S1C
YBP783	a	acl4::natNT2	YCplac33-ACL4 (pBP243)	this study	F2-S1C
YBP781	α	caf40::HIS3MX4 acl4::natNT2	YCplac33-ACL4 (pBP243)	this study	F2-S1C
YBP508	a	WT	YCplac33-ACL4 (pBP243)	this study	F2-S1D
YBP509	α	not3::HIS3MX4	YCplac33-ACL4 (pBP243)	this study	F2-S1D
YBP510	α	acl4::natNT2	YCplac33-ACL4 (pBP243)	this study	F2-S1D
YBP507	a	not3::HIS3MX4 acl4::natNT2	YCplac33-ACL4 (pBP243)	this study	F2-S1D
YBP790	α	WT	YCplac33-ACL4 (pBP243)	this study	F2-S1E
YBP789	α	caf1::HIS3MX4	YCplac33-ACL4 (pBP243)	this study	F2-S1E
YBP792	a	acl4::natNT2	YCplac33-ACL4 (pBP243)	this study	F2-S1E
YBP791	a	caf1::HIS3MX4 acl4::natNT2	YCplac33-ACL4 (pBP243)	this study	F2-S1E
YBP1362	a	WT		this study	F2-S1F
YBP1365	α	ccr4::HIS3MX4		this study	F2-S1F
YBP1364	α	acl4::natNT2		this study	F2-S1F
YBP1363	a	ccr4::HIS3MX4 acl4::natNT2		this study	F2-S1F
YBP514	α	WT	YCplac33-ACL4 (pBP243)	this study	F2-S1G
YBP513	a	not4::HIS3MX4	YCplac33-ACL4 (pBP243)	this study	F2-S1G
YBP512	α	acl4::natNT2	YCplac33-ACL4 (pBP243)	this study	F2-S1G
YBP511	a	not4::HIS3MX4 acl4::natNT2	YCplac33-ACL4 (pBP243)	this study	F2-S1G
YBP1296	α	not5::HIS3MX4	YCplac33-NOT5 (pDK9147)	this study	F2-S1H, F2-S1J
YBP1317	α	not5::HIS3MX4 acl4::natNT2	YCplac33-ACL4 (pBP243) YCplac33-NOT5 (pDK9147)	this study	F2-S1I
YBP1294	a	not5::natNT2	YCplac33-NOT5 (pDK9147)	this study	F2-S1J
YBP1329	a	acl4::natNT2		this study	F2-S1K
YBP1331	α	rps25a::HIS3MX4 acl4::natNT2		this study	F2-S1K
YBP1332	a	rps25b::klTRP1 acl4::natNT2		this study	F2-S1K
YBP1330	α	rps25a::HIS3MX4 rps25b::klTRP1 acl4::natNT2		this study	F2-S1K
(YBP1302xYBP1304)-1D	α	WT		this study	F2-S1K
YBP1323	a	rps25a::HIS3MX4 rps25b::klTRP1		this study	F2-S1K
YBP807	α	WT		this study	F2-S2A
YBP809	a	dhh1::HIS3MX4		this study	F2-S2A
YBP808	α	acl4::natNT2		this study	F2-S2A
YBP810	a	dhh1::HIS3MX4 acl4::natNT2	YCplac33-ACL4 (pBP243)	this study	F2-S2A
YBP769-1B	α	WT	YCplac33-ACL4 (pBP243)	this study	F2-S2B
YBP769-1C	α	pat1::HIS3MX4		this study	F2-S2B
YBP769-1A	a	acl4::natNT2	YCplac33-ACL4 (pBP243)	this study	F2-S2B
YBP769-1D	a	pat1::HIS3MX4 acl4::natNT2	YCplac33-ACL4 (pBP243)	this study	F2-S2B
YGM437	α	WT		this study	F2-S2C
YGM438	a	xrn1::HIS3MX4		this study	F2-S2C
YGM436	a	acl4::natNT2	YCplac33-ACL4 (pBP243)	this study	F2-S2C
YGM439	α	xrn1::HIS3MX4 acl4::natNT2	YCplac33-ACL4 (pBP243)	this study	F2-S2C
YGM419	a	WT		this study	F2-S2D
YGM421	α	ski2::HIS3MX4		this study	F2-S2D
YGM418	α	acl4::natNT2	YCplac33-ACL4 (pBP243)	this study	F2-S2D
YGM420	a	ski2::HIS3MX4 acl4::natNT2	YCplac33-ACL4 (pBP243)	this study	F2-S2D
YBP968	a	BTT1-TAP::HIS3MX4 not1::natNT2		this study	F3A
YBP970	α	EGD1-TAP::HIS3MX4 not1::natNT2		this study	F3A
YBP972	a	EGD2-TAP::HIS3MX4 not1::natNT2		this study	F3A
YBP938	α	CAF130-TAP::HIS3MX4 not1::natNT2		this study	F3A, F3B
YBP976	a	CAL4-TAP::HIS3MX4 not1::natNT2		this study	F3A, F3B
YBP995	α	NOT2-TAP::HIS3MX4 not1::natNT2		this study	F3B
YBP996	a	NOT4-TAP::HIS3MX4 not1::natNT2		this study	F3B
YBP997	a	NOT5-TAP::HIS3MX4 not1::natNT2		this study	F3B
YBP827	a	BTT1-TAP::HIS3MX4		this study	F3C, F3D, F3F
YBP927	a	BTT1-TAP::HIS3MX4 CAF130-GFP::natNT2		this study	F3C
YBP852	α	EGD1-TAP::natNT2		this study	F3C, F3D
YBP930	a	EGD1-TAP::natNT2 CAF130-GFP::HIS3MX4		this study	F3C
YBP823	a	EGD2-TAP::HIS3MX4		this study	F3C, F3D, F3E
YBP932	a	EGD2-TAP::HIS3MX4 CAF130-GFP::natNT2		this study	F3C
YBP594	α	NOT1-TAP::kanMX4		this study	F3C, F3E
YBP925	a	NOT1-TAP::kanMX4 CAF130-GFP::natNT2		this study	F3C
YBP297	a	CAL4-TAP::HIS3MX4		this study	F3C, F3E, F3F
YBP934	α	CAL4-TAP::HIS3MX4 CAF130-GFP::natNT2		this study	F3C
YBP904	α	BTT1-TAP::HIS3MX4 CAL4-GFP::natNT2		this study	F3D
YBP906	α	EGD1-TAP::natNT2 CAL4-GFP::HIS3MX4		this study	F3D
YBP900	α	EGD2-TAP::HIS3MX4 CAL4-GFP::natNT2		this study	F3D
YBP902	α	NOT1-TAP::natNT2 CAL4-GFP::HIS3MX4		this study	F3D
YBP294	a	CAF130-TAP::HIS3MX4		this study	F3D, F3E, F3F
YBP898	α	CAF130-TAP::HIS3MX4 CAL4-GFP::natNT2		this study	F3D
YBP916	a	EGD1-TAP::HIS3MX4		this study	F3E, F3F
YBP942	a	EGD1-TAP::HIS3MX4 BTT1-GFP::natNT2		this study	F3E
YBP944	α	EGD2-TAP::HIS3MX4 BTT1-GFP::natNT2		this study	F3E
YBP940	a	NOT1-TAP::kanMX4 BTT1-GFP::natNT2		this study	F3E
YBP946	a	CAF130-TAP::HIS3MX4 BTT1-GFP::natNT2		this study	F3E
YBP948	a	CAL4-TAP::HIS3MX4 BTT1-GFP::natNT2		this study	F3E
YBP990	a	BTT1-TAP::HIS3MX4 EGD2-GFP::natNT2		this study	F3F
YBP991	α	EGD1-TAP::HIS3MX4 EGD2-GFP::natNT2		this study	F3F
YBP593	a	NOT1-TAP::kanMX4		this study	F3F
YBP992	a	NOT1-TAP::kanMX4 EGD2-GFP::natNT2		this study	F3F
YBP993	a	CAF130-TAP::HIS3MX4 EGD2-GFP::natNT2		this study	F3F
YBP994	a	CAL4-TAP::HIS3MX4 EGD2-GFP::natNT2		this study	F3F
PJ69-4A	a	trp1-901 leu2-3,112 ura3-52 his3-200 gal4Δ gal80Δ LYS2::GAL1-HIS3 GAL2-ADE2 met2::GAL7-lacZ		James et al., 1996; PMID: 8978031	F3G, F3H, F3-S1, F3-S2, F3-S3, F4-S1C, F5-S1
YBP743	α	PRPL4A-RPL4A-stop-BamHI-TRPL4A rpl4b::natNT2		this study	F4A
YBP744	a	PRPL4A-rpl4a.W109C-stop-BamHI-TRPL4A rpl4b::natNT2		this study	F4A
YBP745	a	PRPL4A-rpl4a.BI-stop-BamHI-TRPL4A rpl4b::HIS3MX4		this study	F4A
YBP746	a	PRPL4A-rpl4a.BII-stop-BamHI-TRPL4A rpl4b::natNT2		this study	F4A
YBP747	α	PRPL4A-rpl4a.BIII-stop-BamHI-TRPL4A rpl4b::natNT2		this study	F4A
YBP748	a	PRPL4A-rpl4a.BIV-stop-BamHI-TRPL4A rpl4b::natNT2		this study	F4A
YBP719	α	PRPL4A-RPL4A-stop-BamHI-TRPL4A acl4::natNT2	YCplac33-ACL4 (pBP243)	this study	F4B
YBP720	a	PRPL4A-rpl4a.W109C-stop-BamHI-TRPL4A acl4::natNT2	YCplac33-ACL4 (pBP243)	this study	F4B
YBP721	a	PRPL4A-rpl4a.BI-stop-BamHI-TRPL4A acl4::natNT2	YCplac33-ACL4 (pBP243)	this study	F4B
YBP722	a	PRPL4A-rpl4a.BII-stop-BamHI-TRPL4A acl4::natNT2	YCplac33-ACL4 (pBP243)	this study	F4B
YBP733	α	PRPL4A-rpl4a.BIII-stop-BamHI-TRPL4A acl4::natNT2	YCplac33-ACL4 (pBP243)	this study	F4B
YBP723	a	PRPL4A-rpl4a.BIV-stop-BamHI-TRPL4A acl4::natNT2	YCplac33-ACL4 (pBP243)	this study	F4B
YBP81	a	WT		this study	F1-S2, F4D, F4E, F4F, F4-S2
YBP880	α	caf130::kanMX4		this study	F4D, F4E, F5A, F5C
YBP881	a	caf130::kanMX4		this study	F4D, F4E, F4F, F5A, F5C
YKL205	α	rpl3::kanMX4 ade3::kanMX4	pHTΔ4467-RPL3 (pDK1387)	this study	F5-S2A
YKL207	a	rpl3::kanMX4 ade3::kanMX4	pHTΔ4467-RPL3 (pDK1387)	García-Gómez et al., 2014; PMID: 24603549	F5-S2A
YUS270	α	rrb1::HIS3MX4 ade3::kanMX4	pHTΔ4467-RRB1 (pUS228)	this study	F5-S2D, F6
YUS256/YKL816	a	rrb1::HIS3MX4 ade3::kanMX4	pHTΔ4467-RRB1 (pUS228)	Pausch et al., 2015; PMID: 26112308	F6
YBP1213	a	rrb1::HIS3MX4 ade3::kanMX4	pHTΔ4467-RRB1 (pUS228)	this study	F6
YBP256	α	acl4::natNT2	YCplac33-ACL4 (pBP243)	this study	F6
YKL1358	α	WT		this study	F7A, F7-S1, F7-S2
YKL1360	α	tom1::HIS3MX4		this study	F7A, F7-S1, F7-S2
YBP1131	a	cal4::natNT2		this study	F7B
YBP1130	α	cal4::natNT2 rpl4a::klTRP1		this study	F7B
YBP1132	a	cal4::natNT2 tom1::HIS3MX4	pADH33-CAL4 (pBP1125)	this study	F7B
YBP1129	α	cal4::natNT2 tom1::HIS3MX4 rpl4a::klTRP1		this study	F7B
YBP1341	α	caf130::natNT2	pADH33-CAF130 (pBP829)	this study	F7B
YBP1339	a	caf130::natNT2 rpl4a::klTRP1	pADH33-CAF130 (pBP829)	this study	F7B
YBP1338	α	caf130::natNT2 tom1::HIS3MX4	pADH33-CAF130 (pBP829)	this study	F7B
YBP1340	a	caf130::natNT2 tom1::HIS3MX4 rpl4a::klTRP1	pADH33-CAF130 (pBP829)	this study	F7B
YBP1349	α	caf130::natNT2 tom1::HIS3MX4 rpl3::kanMX4	pHTΔ4467-RPL3 (pDK1387) pADH33-CAF130 (pBP829)	this study	F7C
YBP1376	α	caf130::natNT2 tom1::HIS3MX4 rpl3::kanMX4 rpl4a::klTRP1	pHTΔ4467-RPL3 (pDK1387) pADH33-CAF130 (pBP829)	this study	F7C
YBP1194	a	PTOM1-HIS3MX4-PGAL1-2HA-TOM1		this study	F7D
YBP1137	α	caf130::natNT2 PTOM1-HIS3MX4-PGAL1-2HA-TOM1		this study	F7D
YBP1193	α	cal4::natNT2 PTOM1-HIS3MX4-PGAL1-2HA-TOM1		this study	F7D
YBP1050	a	WT		this study	F7-S3A
YBP1053	α	cal4::natNT2		this study	F7-S3A
YBP1052	a	tom1::HIS3MX4		this study	F7-S3A
YBP1051	α	tom1::HIS3MX4 cal4::natNT2	pADH33-CAL4 (pBP1125)	this study	F7-S3A
YBP1032	α	WT		this study	F7-S3B
YBP1031	a	caf130::natNT2		this study	F7-S3B
YBP1033	a	tom1::HIS3MX4		this study	F7-S3B
YBP1030	α	tom1::HIS3MX4 caf130::natNT2	pADH33-CAF130 (pBP829)	this study	F7-S3B
YBP1386	α	tom1::HIS3MX4 not1::natNT2		this study	F7-S3C
YBP1042	a	WT		this study	F7-S3D
YBP1040	a	btt1::natNT2		this study	F7-S3D
YBP1041	α	tom1::HIS3MX4		this study	F7-S3D
YBP1043	α	tom1::HIS3MX4 btt1::natNT2		this study	F7-S3D
YBP1063	α	WT		this study	F7-S3E
YBP1062	α	egd1::natNT2		this study	F7-S3E
YBP1060	a	tom1::HIS3MX4		this study	F7-S3E
YBP1061	a	tom1::HIS3MX4 egd1::natNT2		this study	F7-S3E
YBP1111	a	WT		this study	F7-S3F
YBP1109	α	btt1::natNT2 egd1::HIS3MX4		this study	F7-S3F
YBP1108	α	tom1::kanMX4		this study	F7-S3F
YBP1110	a	tom1::kanMX4 btt1::natNT2 egd1::HIS3MX4	pADH33-EGD1 (pBP1126)	this study	F7-S3F
YBP1070	α	WT		this study	F7-S3G
YBP1071	α	egd2::HIS3MX4		this study	F7-S3G
YBP1073	a	tom1::kanMX4		this study	F7-S3G
YBP1072	a	tom1::kanMX4 egd2::HIS3MX4	YCplac33-EGD2 (pBP1127)	this study	F7-S3G
YBP1237	α	rpl4a::natNT2		this study	F7-S3H
YBP1235	a	PRPL4A-rpl4a.BIV-stop-BamHI-TRPL4A		this study	F7-S3H
YBP1236	α	rpl4a::natNT2 PTOM1-HIS3MX4-PGAL1-2HA-TOM1		this study	F7-S3H
YBP1234	a	PRPL4A-rpl4a.BIV-stop-BamHI-TRPL4A PTOM1-HIS3MX4-PGAL1-2HA-TOM1		this study	F7-S3H
YBP1204	α	rpl3::kanMX4 PTOM1-HIS3MX4-PGAL1-2HA-TOM1 ade3::kanMX4	pHTΔ4467-RPL3 (pDK1387)	this study	F7-S3I
YBP1136	α	caf130::natNT2 PTOM1-HIS3MX4-PGAL1-2HA-TOM1		this study	F7-S4
YBP143	α	rpl4a::klURA3NPT2		this study	YBP678/680/682/684/687
YBP144	a	rpl4a::klURA3NPT2		this study	YBP679/681/683/686/688
YBP678	α	PRPL4A-RPL4A-stop-BamHI-TRPL4A		this study	YBP719
YBP680	α	PRPL4A-rpl4a.W109C-stop-BamHI-TRPL4A		this study	YBP720
YBP682	α	PRPL4A-rpl4a.BI-stop-BamHI-TRPL4A		this study	YBP721, YBP745
YBP684	α	PRPL4A-rpl4a.BII-stop-BamHI-TRPL4A		this study	YBP722
YBP686	a	PRPL4A-rpl4a.BIII-stop-BamHI-TRPL4A		this study	YBP733, YBP747
YBP687	α	PRPL4A-rpl4a.BIV-stop-BamHI-TRPL4A		this study	YBP723
YBP98	a	acl4::natNT2 rpl4a::HIS3MX4	YCplac33-ACL4 (pBP243)	Pillet et al., 2015; PMID: 26447800	YBP719-723 / Δacl4 suppressor screen
YBP104	α	acl4::natNT2 rpl4a::HIS3MX4	YCplac33-ACL4 (pBP243)	this study	YBP733 / Δacl4 suppressor screen
YBP679	a	PRPL4A-RPL4A-stop-BamHI-TRPL4A		this study	YBP743
YBP681	a	PRPL4A-rpl4a.W109C-stop-BamHI-TRPL4A		this study	YBP744
YBP683	a	PRPL4A-rpl4a.BII-stop-BamHI-TRPL4A		this study	YBP746
YBP688	a	PRPL4A-rpl4a.BIV-stop-BamHI-TRPL4A		this study	YBP748
YBP34	a	rpl4a::natNT2 rpl4b::HIS3MX4	pHT4467Δ-RPL4A (pBP36)	this study	YBP745
YBP52	α	rpl4a::HIS3MX4 rpl4b::natNT2	pHT4467Δ-RPL4A (pBP36)	this study	YBP743/744/746-748
YKL697	α	acl4::HIS3MX4		this study	Δacl4 suppressor screen
YKL698	a	acl4::HIS3MX4		this study	Δacl4 suppressor screen
YKL700	α	acl4::HIS3MX4		this study	Δacl4 suppressor screen
YKL703	α	acl4::natNT2		Pillet et al., 2015; PMID: 26447800	Δacl4 suppressor screen
YKL704	a	acl4::natNT2		this study	Δacl4 suppressor screen
YKL707	a	acl4::natNT2		this study	Δacl4 suppressor screen
YKL708	α	acl4::natNT2		this study	Δacl4 suppressor screen
