# Supplementary material for: Dedicated chaperones coordinate co-translational regulation of ribosomal protein production with ribosome assembly to preserve proteostasis
Source: eLife. 2022 Mar 31;11:e74255. doi: 10.7554/eLife.74255 (PMC8970588; doi:10.7554/eLife.74255)
Supplement: Supplementary file 2. [file elife-74255-supp2.xlsx]

## Sheet: Tabelle1
ID	name	relevant information	source	used in figure
pBP987	pTAPC111-NOT1	CEN, LEU2, PNOT1, TCYC1, C-terminal TAP tag	this study	F2B, F2-S1A
pBP906	pTAPC111-NOT1.M163L	CEN, LEU2, PNOT1, TCYC1, C-terminal TAP tag	this study	F2B, F2-S1A
pBP907	pTAPC111-NOT1.M163A	CEN, LEU2, PNOT1, TCYC1, C-terminal TAP tag	this study	F2B, F2-S1A
pBP1249	pTAPC111-NOT1.N40(oofATG)	CEN, LEU2, PNOT1, TCYC1, C-terminal TAP tag	this study	F2B, F2-S1A
pBP1250	pTAPC111-NOT1.N156(oofATG)	CEN, LEU2, PNOT1, TCYC1, C-terminal TAP tag	this study	F2B, F2-S1A
pBP645	YCplac111-NOT1	CEN, LEU2, PNOT1, TADH1	this study	F2C, F2D, F2E, F7-S3C
pBP646	YCplac111-not1.21C	CEN, LEU2, PNOT1, TADH1	this study	F2C, F2D, F7-S3C
pBP786	YCplac111-not1.29C	CEN, LEU2, PNOT1, TADH1	this study	F2C, F2D, F7-S3C
pBP972	YCplac111-not1.163C	CEN, LEU2, PNOT1, TADH1	this study	F2C, F2D, F2E, F7-S3C
pDK6522	YCplac111-NOT5	CEN, LEU2, PNOT5, TADH1	this study	F2-S1H, F2-S1I, F2-S1J
pDK9152	YCplac111-not5.114C	CEN, LEU2, PNOT5, TADH1	this study	F2-S1H, F2-S1I, F2-S1J
pDK406	YCplac22	CEN, TRP1, empty vector	Gietz & Sugino, 1988; PMID: 3073106	F2-S1I
pBP355	YCplac22-ACL4	CEN, TRP1, PACL4, TADH1	this study	F2-S1I
pBP571	YCplac33-NOT1	CEN, URA3, PNOT1, TADH1	this study	F3A, F7-S3C, shuffle strain
pBP894	pyEGFPGAC22-NOT1	CEN, TRP1, PNOT1, TADH1, C-terminal (GA)5-yEGFP	this study	F3A
pBP649	YCplac111-not1.154C	CEN, LEU2, PNOT1, TADH1	this study	F3B
pBP895	pyEGFPGAC22-not1.154C	CEN, TRP1, PNOT1, TADH1, C-terminal (GA)5-yEGFP	this study	F3B
pBP477	pGAG4ADC111-CAF130	CEN, LEU2, PADH1, TADH1, C-terminal (GA)5-G4AD	this study	F3G, F3H, F3-S1, F3-S2
pDK2965	pGAG4BDC22	CEN, TRP1, PADH1, TADH1, C-terminal (GA)5-G4BD	lab plasmid	F3G, F3-S1F, F3-S2, F3-S3A, F5-S1
pBP915	pGAG4BDC22-NOT1	CEN, TRP1, PADH1, TADH1, C-terminal (GA)5-G4BD	this study	F3G, F3H, F3-S1C, F3-S2A
pBP478	pGAG4BDC22-CAL4	CEN, TRP1, PADH1, TADH1, C-terminal (GA)5-G4BD	this study	F3G, F3H, F3-S1A, F3-S2C
pDK6498	pGAG4BDC22-BTT1	CEN, TRP1, PADH1, TADH1, C-terminal (GA)5-G4BD	this study	F3G, F3H, F3-S1B, F3-S1F, F3-S2B, F3-S3
pDK6499	pGAG4BDC22-EGD1	CEN, TRP1, PADH1, TADH1, C-terminal (GA)5-G4BD	this study	F3G, F3-S1D, F3-S1F, F3-S3A
pDK6500	pGAG4BDC22-EGD2	CEN, TRP1, PADH1, TADH1, C-terminal (GA)5-G4BD	this study	F3G, F3-S1E, F3-S1F
pDK6737	pGAG4BDC22-NOT1.21-153	CEN, TRP1, PADH1, TADH1, C-terminal (GA)5-G4BD	this study	F3H, F3-S2A
pDK6820	pGAG4BDC22-BTT1.38-129	CEN, TRP1, PADH1, TADH1, C-terminal (GA)5-G4BD	this study	F3H, F3-S2B, F3-S3B
pDK7003	pGAG4BDC22-CAL4.26-222	CEN, TRP1, PADH1, TADH1, C-terminal (GA)5-G4BD	this study	F3H
pDK6600	pGAG4ADC111-CAF130.40-655	CEN, LEU2, PADH1, TADH1, C-terminal (GA)5-G4AD	this study	F3H, F3-S2A
pDK6654	pGAG4ADC111-CAF130.292-655	CEN, LEU2, PADH1, TADH1, C-terminal (GA)5-G4AD	this study	F3H, F3-S2B
pDK6658	pGAG4ADC111-CAF130.686-938	CEN, LEU2, PADH1, TADH1, C-terminal (GA)5-G4AD	this study	F3H, F3-S2C
pBP916	pGAG4ADC111-NOT1	CEN, LEU2, PADH1, TADH1, C-terminal (GA)5-G4AD	this study	F3-S1A, F3-S1B, F3-S1D, F3-S1E
pDK6501	pGAG4ADC111-BTT1	CEN, LEU2, PADH1, TADH1, C-terminal (GA)5-G4AD	this study	F3-S1A, F3-S1C, F3-S1D, F3-S1E
pDK6502	pGAG4ADC111-EGD1	CEN, LEU2, PADH1, TADH1, C-terminal (GA)5-G4AD	this study	F3-S1A, F3-S1B, F3-S1C, F3-S1E
pDK6503	pGAG4ADC111-EGD2	CEN, LEU2, PADH1, TADH1, C-terminal (GA)5-G4AD	this study	F3-S1A, F3-S1B, F3-S1C, F3-S1D, F3-S3
pBP479	pGAG4ADC111-CAL4	CEN, LEU2, PADH1, TADH1, C-terminal (GA)5-G4AD	this study	F3-S1B, F3-S1C, F3-S1D, F3-S1E
pDK2966	pGAG4ADC111	CEN, LEU2, PADH1, TADH1, C-terminal (GA)5-G4AD	lab plasmid	F3-S1C, F3-S1F, F3-S2, F3-S3B, F4-S1C, F5-S1
pDK6599	pGAG4ADC111-CAF130.N655	CEN, LEU2, PADH1, TADH1, C-terminal (GA)5-G4AD	this study	F3-S2
pBP557	pGAG4ADC111-CAF130.N607	CEN, LEU2, PADH1, TADH1, C-terminal (GA)5-G4AD	this study	F3-S2A, F3-S2B
pDK6660	pGAG4ADC111-CAF130.N580	CEN, LEU2, PADH1, TADH1, C-terminal (GA)5-G4AD	this study	F3-S2A, F3-S2B
pBP555	pGAG4ADC111-CAF130.608C	CEN, LEU2, PADH1, TADH1, C-terminal (GA)5-G4AD	this study	F3-S2A, F3-S2B
pDK6651	pGAG4ADC111-CAF130.59-655	CEN, LEU2, PADH1, TADH1, C-terminal (GA)5-G4AD	this study	F3-S2A
pBP1202	pGAG4BDC22-NOT1.21C	CEN, TRP1, PADH1, TADH1, C-terminal (GA)5-G4BD	this study	F3-S2A
pBP1203	pGAG4BDC22-NOT1.29C	CEN, TRP1, PADH1, TADH1, C-terminal (GA)5-G4BD	this study	F3-S2A
pDK6619	pGAG4BDC22-NOT1.N153	CEN, TRP1, PADH1, TADH1, C-terminal (GA)5-G4BD	this study	F3-S2A
pDK6620	pGAG4BDC22-NOT1.N140	CEN, TRP1, PADH1, TADH1, C-terminal (GA)5-G4BD	this study	F3-S2A
pDK6805	pGAG4ADC111-CAF130.318-655	CEN, LEU2, PADH1, TADH1, C-terminal (GA)5-G4AD	this study	F3-S2B
pDK6568	pGAG4BDC22-BTT1.N129	CEN, TRP1, PADH1, TADH1, C-terminal (GA)5-G4BD	this study	F3-S2B, F3-S3B
pDK6624	pGAG4BDC22-BTT1.N112	CEN, TRP1, PADH1, TADH1, C-terminal (GA)5-G4BD	this study	F3-S2B, F3-S3B
pDK6623	pGAG4BDC22-BTT1.38C	CEN, TRP1, PADH1, TADH1, C-terminal (GA)5-G4BD	this study	F3-S2B, F3-S3B
pDK9533	pGAG4BDC22-BTT1.38-112	CEN, TRP1, PADH1, TADH1, C-terminal (GA)5-G4BD	this study	F3-S2B
pDK6571	pGAG4BDC22-BTT1.54C	CEN, TRP1, PADH1, TADH1, C-terminal (GA)5-G4BD	this study	F3-S2B, F3-S3B
pDK6821	pGAG4BDC22-BTT1.54-129	CEN, TRP1, PADH1, TADH1, C-terminal (GA)5-G4BD	this study	F3-S2B, F3-S3B
pDK9535	pGAG4BDC22-BTT1.54-112	CEN, TRP1, PADH1, TADH1, C-terminal (GA)5-G4BD	this study	F3-S2B
pDK6572	pGAG4BDC22-BTT1.101C	CEN, TRP1, PADH1, TADH1, C-terminal (GA)5-G4BD	this study	F3-S2B, F3-S3B
pDK6573	pGAG4BDC22-BTT1.111C	CEN, TRP1, PADH1, TADH1, C-terminal (GA)5-G4BD	this study	F3-S2B, F3-S3B
pDK6602	pGAG4ADC111-CAF130.686C	CEN, LEU2, PADH1, TADH1, C-terminal (GA)5-G4AD	this study	F3-S2C
pDK6656	pGAG4ADC111-CAF130.699C	CEN, LEU2, PADH1, TADH1, C-terminal (GA)5-G4AD	this study	F3-S2C
pBP655	pGAG4ADC111-CAF130.716C	CEN, LEU2, PADH1, TADH1, C-terminal (GA)5-G4AD	this study	F3-S2C
pBP659	pGAG4ADC111-CAF130.740C	CEN, LEU2, PADH1, TADH1, C-terminal (GA)5-G4AD	this study	F3-S2C
pDK6809	pGAG4ADC111-CAF130.686-907	CEN, LEU2, PADH1, TADH1, C-terminal (GA)5-G4AD	this study	F3-S2C
pDK6813	pGAG4BDC22-CAL4.N222	CEN, TRP1, PADH1, TADH1, C-terminal (GA)5-G4BD	this study	F3-S2C
pBP6899	pGAG4BDC22-CAL4.N212	CEN, TRP1, PADH1, TADH1, C-terminal (GA)5-G4BD	this study	F3-S2C
pDK6898	pGAG4BDC22-CAL4.38C	CEN, TRP1, PADH1, TADH1, C-terminal (GA)5-G4BD	this study	F3-S2C
pBP593	pGAG4BDC22-CAL4.50C	CEN, TRP1, PADH1, TADH1, C-terminal (GA)5-G4BD	this study	F3-S2C
pDK7005	pGAG4BDC22-CAL4.38-241	CEN, TRP1, PADH1, TADH1, C-terminal (GA)5-G4BD	this study	F3-S2C
pDK6968	pGAG4BDC22-CAL4.38-222	CEN, TRP1, PADH1, TADH1, C-terminal (GA)5-G4BD	this study	F3-S2C
pDK6969	pGAG4BDC22-CAL4.38-212	CEN, TRP1, PADH1, TADH1, C-terminal (GA)5-G4BD	this study	F3-S2C
pDK6906	pGAG4ADC111-EGD2.N79	CEN, LEU2, PADH1, TADH1, C-terminal (GA)5-G4AD	this study	F3-S3A
pDK6907	pGAG4ADC111-EGD2.N73	CEN, LEU2, PADH1, TADH1, C-terminal (GA)5-G4AD	this study	F3-S3A
pDK6901	pGAG4ADC111-EGD2.11C	CEN, LEU2, PADH1, TADH1, C-terminal (GA)5-G4AD	this study	F3-S3A
pDK6902	pGAG4ADC111-EGD2.25C	CEN, LEU2, PADH1, TADH1, C-terminal (GA)5-G4AD	this study	F3-S3A
pDK9725	pGAG4ADC111-EGD2.11-79	CEN, LEU2, PADH1, TADH1, C-terminal (GA)5-G4AD	this study	F3-S3A
pDK9726	pGAG4ADC111-EGD2.25-79	CEN, LEU2, PADH1, TADH1, C-terminal (GA)5-G4AD	this study	F3-S3A
pDK6569	pGAG4BDC22-BTT1.N101	CEN, TRP1, PADH1, TADH1, C-terminal (GA)5-G4BD	this study	F3-S3B
pDK9534	pGAG4BDC22-BTT1.38-101	CEN, TRP1, PADH1, TADH1, C-terminal (GA)5-G4BD	this study	F3-S3B
pDK9536	pGAG4BDC22-BTT1.54-101	CEN, TRP1, PADH1, TADH1, C-terminal (GA)5-G4BD	this study	F3-S3B
pBP859	pADH111-RPL4A-(GA)5-yEGFP	CEN, LEU2, PADH1, TADH1, C-terminal (GA)5-yEGFP	this study	F4D
pBP988	pADH111-rpl4a.BI-(GA)5-yEGFP	CEN, LEU2, PADH1, TADH1, C-terminal (GA)5-yEGFP	this study	F4D
pBP989	pADH111-rpl4a.BII-(GA)5-yEGFP	CEN, LEU2, PADH1, TADH1, C-terminal (GA)5-yEGFP	this study	F4D
pBP990	pADH111-rpl4a.BIII-(GA)5-yEGFP	CEN, LEU2, PADH1, TADH1, C-terminal (GA)5-yEGFP	this study	F4D
pBP991	pADH111-rpl4a.BIV-(GA)5-yEGFP	CEN, LEU2, PADH1, TADH1, C-terminal (GA)5-yEGFP	this study	F4D
pBP1210	pADH111-rpl4a.W109C-(GA)5-yEGFP	CEN, LEU2, PADH1, TADH1, C-terminal (GA)5-yEGFP	this study	F4D
pBP1240	pADH111-yEGFP-RPL4A.BI.43C	CEN, LEU2, PADH1, TADH1, N-terminal yEGFP	this study	F4E
pBP1241	pADH111-yEGFP-RPL4A.BI.78C	CEN, LEU2, PADH1, TADH1, N-terminal yEGFP	this study	F4E
pBP1242	pADH111-yEGFP-RPL4A.BI.88C	CEN, LEU2, PADH1, TADH1, N-terminal yEGFP	this study	F4E
pBP1243	pADH111-yEGFP-RPL4A.96C	CEN, LEU2, PADH1, TADH1, N-terminal yEGFP	this study	F4E
pBP1244	pADH111-yEGFP-RPL4A.101C	CEN, LEU2, PADH1, TADH1, N-terminal yEGFP	this study	F4E
pBP1245	pADH111-yEGFP-RPL4A.111C	CEN, LEU2, PADH1, TADH1, N-terminal yEGFP	this study	F4E
pBP1137	pADH111-RPL4A.BI.N104-(GA)5-yEGFP	CEN, LEU2, PADH1, TADH1, C-terminal (GA)5-yEGFP	this study	F4E
pBP1136	pADH111-RPL4A.BI.N114-(GA)5-yEGFP	CEN, LEU2, PADH1, TADH1, C-terminal (GA)5-yEGFP	this study	F4E
pBP1134	pADH111-RPL4A.BI.N132-(GA)5-yEGFP	CEN, LEU2, PADH1, TADH1, C-terminal (GA)5-yEGFP	this study	F4E
pBP1133	pADH111-RPL4A.BI.N139-(GA)5-yEGFP	CEN, LEU2, PADH1, TADH1, C-terminal (GA)5-yEGFP	this study	F4E
pBP1329	pADH111-NTAPF-RPL4A.78-139-(GA)5-yEGFP	CEN, LEU2, PADH1, TADH1, N-terminal protA-TEV-CBP-Flag tag, C-terminal (GA)5-yEGFP	this study	F4F
pBP1330	pADH111-NTAPF-RPL4A.BI.78-139-(GA)5-yEGFP	CEN, LEU2, PADH1, TADH1, N-terminal protA-TEV-CBP-Flag tag, C-terminal (GA)5-yEGFP	this study	F4F
pBP1331	pADH111-NTAPF-RPL4A.BII.78-139-(GA)5-yEGFP	CEN, LEU2, PADH1, TADH1, N-terminal protA-TEV-CBP-Flag tag, C-terminal (GA)5-yEGFP	this study	F4F
pBP1332	pADH111-NTAPF-RPL4A.BIII.78-139-(GA)5-yEGFP	CEN, LEU2, PADH1, TADH1, N-terminal protA-TEV-CBP-Flag tag, C-terminal (GA)5-yEGFP	this study	F4F
pBP1333	pADH111-NTAPF-RPL4A.BIV.78-139-(GA)5-yEGFP	CEN, LEU2, PADH1, TADH1, N-terminal protA-TEV-CBP-Flag tag, C-terminal (GA)5-yEGFP	this study	F4F
pBP1334	pADH111-NTAPF-RPL4A.BI.W109C.78-139-(GA)5-yEGFP	CEN, LEU2, PADH1, TADH1, N-terminal protA-TEV-CBP-Flag tag, C-terminal (GA)5-yEGFP	this study	F4F
pBP241	pGAG4BDC22-ACL4	CEN, TRP1, PADH1, TADH1, C-terminal (GA)5-G4BD	this study	F4-S1C
pBP20	pGAG4ADC111-RPL4A	CEN, LEU2, PADH1, TADH1, C-terminal (GA)5-G4AD	this study	F4-S1C
pBP328	pGAG4ADC111-rpl4a.W109C	CEN, LEU2, PADH1, TADH1, C-terminal (GA)5-G4AD	this study	F4-S1C
pBP242	pGAG4ADC111-ACL4	CEN, LEU2, PADH1, TADH1, C-terminal (GA)5-G4AD	Pillet et al., 2015; PMID: 26447800	F4-S1C
pBP15	pGAG4BDC22-RPL4A	CEN, TRP1, PADH1, TADH1, C-terminal (GA)5-G4BD	Pillet et al., 2015; PMID: 26447800	F4-S1C
pBP1340	pGAG4BDC22-rpl4a.W109C	CEN, TRP1, PADH1, TADH1, C-terminal (GA)5-G4BD	this study	F4-S1C
pBP1378	pGAL111-NTAPF-RPL4A.BI.78-139-(GA)5-yEGFP	CEN, LEU2, PGAL1-10, TADH1, N-terminal protA-TEV-CBP-Flag tag, C-terminal (GA)5-yEGFP	this study	F4-S2
pBP1379	pGAL111-NTAPF-RPL4A.BIV.78-139-(GA)5-yEGFP	CEN, LEU2, PGAL1-10, TADH1, N-terminal protA-TEV-CBP-Flag tag, C-terminal (GA)5-yEGFP	this study	F4-S2
pDK8144	pADH111-RPL3-(GA)5-yEGFP	CEN, LEU2, PADH1, TADH1, C-terminal (GA)5-yEGFP	this study	F5A
pDK9558	pADH111-rpl3.H3E-(GA)5-yEGFP	CEN, LEU2, PADH1, TADH1, C-terminal (GA)5-yEGFP	this study	F5A
pDK8284	pADH111-RPL3.8C-(GA)5-yEGFP	CEN, LEU2, PADH1, TADH1, C-terminal (GA)5-yEGFP	this study	F5A
pDK8285	pADH111-RPL3.12C-(GA)5-yEGFP	CEN, LEU2, PADH1, TADH1, C-terminal (GA)5-yEGFP	this study	F5A
pDK8286	pADH111-RPL3.15C-(GA)5-yEGFP	CEN, LEU2, PADH1, TADH1, C-terminal (GA)5-yEGFP	this study	F5A
pDK8287	pADH111-RPL3.18C-(GA)5-yEGFP	CEN, LEU2, PADH1, TADH1, C-terminal (GA)5-yEGFP	this study	F5A
pDK8385	pADH111-RPL3.8-44-(GA)5-yEGFP	CEN, LEU2, PADH1, TADH1, C-terminal (GA)5-yEGFP	this study	F5A
pDK8402	pADH111-RPL3.8-48-(GA)5-yEGFP	CEN, LEU2, PADH1, TADH1, C-terminal (GA)5-yEGFP	this study	F5A
pDK8384	pADH111-RPL3.8-52-(GA)5-yEGFP	CEN, LEU2, PADH1, TADH1, C-terminal (GA)5-yEGFP	this study	F5A
pDK8362	pADH111-RPL3.N52-(GA)5-yEGFP	CEN, LEU2, PADH1, TADH1, C-terminal (GA)5-yEGFP	this study	F5A, F5-S2B
pDK8901	pADH111-RPL3.N52.H3E-(GA)5-yEGFP	CEN, LEU2, PADH1, TADH1, C-terminal (GA)5-yEGFP	this study	F5C, F5-S2B
pDK8960	pADH111-RPL3.N52.H3E/R10A/H11A-(GA)5-yEGFP	CEN, LEU2, PADH1, TADH1, C-terminal (GA)5-yEGFP	this study	F5C
pDK8962	pADH111-RPL3.N52.H3E/H13A/L14A-(GA)5-yEGFP	CEN, LEU2, PADH1, TADH1, C-terminal (GA)5-yEGFP	this study	F5C
pDK8964	pADH111-RPL3.N52.H3E/F16A/L17A-(GA)5-yEGFP	CEN, LEU2, PADH1, TADH1, C-terminal (GA)5-yEGFP	this study	F5C
pDK8965	pADH111-RPL3.N52.H3E/R19A/K20A/R21A-(GA)5-yEGFP	CEN, LEU2, PADH1, TADH1, C-terminal (GA)5-yEGFP	this study	F5C
pDK8966	pADH111-RPL3.N52.H3E/I25A/R26A-(GA)5-yEGFP	CEN, LEU2, PADH1, TADH1, C-terminal (GA)5-yEGFP	this study	F5C
pDK8967	pADH111-RPL3.N52.H3E/R28A/K30A-(GA)5-yEGFP	CEN, LEU2, PADH1, TADH1, C-terminal (GA)5-yEGFP	this study	F5C
pDK8968	pADH111-RPL3.N52.H3E/F32A/P33A/K34A-(GA)5-yEGFP	CEN, LEU2, PADH1, TADH1, C-terminal (GA)5-yEGFP	this study	F5C
pDK8969	pADH111-RPL3.N52.H3E/R37A/K39A-(GA)5-yEGFP	CEN, LEU2, PADH1, TADH1, C-terminal (GA)5-yEGFP	this study	F5C
pDK8970	pADH111-RPL3.N52.H3E/F46A/L47A-(GA)5-yEGFP	CEN, LEU2, PADH1, TADH1, C-terminal (GA)5-yEGFP	this study	F5C
pDK3652	pG4ADHAN111-RRB1	CEN, LEU2, PADH1, TADH1, N-terminal G4AD	Pausch et al., 2015; PMID: 26112308	F5-S1A
pUS124	pGAG4BDC22-RPL3.N15	CEN, TRP1, PADH1, TADH1, C-terminal (GA)5-G4BD	Pausch et al., 2015; PMID: 26112308	F5-S1A
pDK8789	pGAG4BDC22-RPL3.8C	CEN, TRP1, PADH1, TADH1, C-terminal (GA)5-G4BD	Pausch et al., 2015; PMID: 26112308	F5-S1A
pDK3599	pGAG4BDC22-RPL3	CEN, TRP1, PADH1, TADH1, C-terminal (GA)5-G4BD	Pausch et al., 2015; PMID: 26112308	F5-S1A
pDK8551	pGAG4BDC22-rpl3.H3E	CEN, TRP1, PADH1, TADH1, C-terminal (GA)5-G4BD	this study	F5-S1A
pDK8552	pGAG4BDC22-rpl3.R4E	CEN, TRP1, PADH1, TADH1, C-terminal (GA)5-G4BD	this study	F5-S1A
pDK8553	pGAG4BDC22-rpl3.K5E	CEN, TRP1, PADH1, TADH1, C-terminal (GA)5-G4BD	this study	F5-S1A
pDK8555	pGAG4BDC22-rpl3.R4A/K5A	CEN, TRP1, PADH1, TADH1, C-terminal (GA)5-G4BD	this study	F5-S1A
pDK8556	pGAG4BDC22-rpl3.Y6E	CEN, TRP1, PADH1, TADH1, C-terminal (GA)5-G4BD	this study	F5-S1A
pDK8558	pGAG4BDC22-rpl3.R10E/H11E	CEN, TRP1, PADH1, TADH1, C-terminal (GA)5-G4BD	this study	F5-S1A
pDK8559	pGAG4BDC22-rpl3.R10A/H11A	CEN, TRP1, PADH1, TADH1, C-terminal (GA)5-G4BD	this study	F5-S1A
pDK8562	pGAG4BDC22-rpl3.H13A/L14A	CEN, TRP1, PADH1, TADH1, C-terminal (GA)5-G4BD	this study	F5-S1A
pDK8564	pGAG4BDC22-rpl3.F16A/L17A	CEN, TRP1, PADH1, TADH1, C-terminal (GA)5-G4BD	this study	F5-S1A
pDK8565	pGAG4BDC22-rpl3.R19A/K20A/R21A	CEN, TRP1, PADH1, TADH1, C-terminal (GA)5-G4BD	this study	F5-S1A
pDK8566	pGAG4BDC22-rpl3.I25A/R26A	CEN, TRP1, PADH1, TADH1, C-terminal (GA)5-G4BD	this study	F5-S1A
pDK8567	pGAG4BDC22-rpl3.R28A/K30A	CEN, TRP1, PADH1, TADH1, C-terminal (GA)5-G4BD	this study	F5-S1A
pDK8568	pGAG4BDC22-rpl3.F32A/P33A/K34A	CEN, TRP1, PADH1, TADH1, C-terminal (GA)5-G4BD	this study	F5-S1A
pDK8569	pGAG4BDC22-rpl3.R37A/K39A	CEN, TRP1, PADH1, TADH1, C-terminal (GA)5-G4BD	this study	F5-S1A
pDK8570	pGAG4BDC22-rpl3.F46A/L47A	CEN, TRP1, PADH1, TADH1, C-terminal (GA)5-G4BD	this study	F5-S1A
pDK8829	pGAG4BDC22-RPL3.8-52	CEN, TRP1, PADH1, TADH1, C-terminal (GA)5-G4BD	this study	F5-S1A
pDK8860	pGAG4BDC22-RPL3.N52	CEN, TRP1, PADH1, TADH1, C-terminal (GA)5-G4BD	this study	F5-S1A
pDK8851	pGAG4BDC22-RPL3.N52.H3E	CEN, TRP1, PADH1, TADH1, C-terminal (GA)5-G4BD	this study	F5-S1A
pDK8852	pGAG4BDC22-RPL3.N52.R4E	CEN, TRP1, PADH1, TADH1, C-terminal (GA)5-G4BD	this study	F5-S1A
pDK8853	pGAG4BDC22-RPL3.N52.K5E	CEN, TRP1, PADH1, TADH1, C-terminal (GA)5-G4BD	this study	F5-S1A
pDK8855	pGAG4BDC22-RPL3.N52.R4A/K5A	CEN, TRP1, PADH1, TADH1, C-terminal (GA)5-G4BD	this study	F5-S1A
pDK8856	pGAG4BDC22-RPL3.N52.Y6E	CEN, TRP1, PADH1, TADH1, C-terminal (GA)5-G4BD	this study	F5-S1A
pDK8858	pGAG4BDC22-RPL3.N52.R10E/H11E	CEN, TRP1, PADH1, TADH1, C-terminal (GA)5-G4BD	this study	F5-S1A
pDK8859	pGAG4BDC22-RPL3.N52.R10A/H11A	CEN, TRP1, PADH1, TADH1, C-terminal (GA)5-G4BD	this study	F5-S1A
pDK8862	pGAG4BDC22-RPL3.N52.H13A/L14A	CEN, TRP1, PADH1, TADH1, C-terminal (GA)5-G4BD	this study	F5-S1A
pDK8864	pGAG4BDC22-RPL3.N52.F16A/L17A	CEN, TRP1, PADH1, TADH1, C-terminal (GA)5-G4BD	this study	F5-S1A
pDK8865	pGAG4BDC22-RPL3.N52.R19A/K20A/R21A	CEN, TRP1, PADH1, TADH1, C-terminal (GA)5-G4BD	this study	F5-S1A
pDK8866	pGAG4BDC22-RPL3.N52.I25A/R26A	CEN, TRP1, PADH1, TADH1, C-terminal (GA)5-G4BD	this study	F5-S1A
pDK8867	pGAG4BDC22-RPL3.N52.R28A/K30A	CEN, TRP1, PADH1, TADH1, C-terminal (GA)5-G4BD	this study	F5-S1A
pDK8868	pGAG4BDC22-RPL3.N52.F32A/P33A/K34A	CEN, TRP1, PADH1, TADH1, C-terminal (GA)5-G4BD	this study	F5-S1A
pDK8869	pGAG4BDC22-RPL3.N52.R37A/K39A	CEN, TRP1, PADH1, TADH1, C-terminal (GA)5-G4BD	this study	F5-S1A
pDK8870	pGAG4BDC22-RPL3.N52.F46A/L47A	CEN, TRP1, PADH1, TADH1, C-terminal (GA)5-G4BD	this study	F5-S1A
pDK317	YCplac111 (∆EcoRI/∆HindIII/∆SphI/∆PstI)	CEN, LEU2, empty vector	lab plasmid	F5-S2A, F5-S2B, F5-S2D, F6A, F7D, F7-S1, F7-S2AB, F7-S3C
pDK8670	YCplac111-RPL3	CEN, LEU2, PRPL3, TADH1	this study	F5-S2A
pDK8597	YCplac111-rpl3.8C	CEN, LEU2, PRPL3, TADH1	this study	F5-S2A
pDK8661	YCplac111-rpl3.H3E	CEN, LEU2, PRPL3, TADH1	this study	F5-S2A
pDK8662	YCplac111-rpl3.R4E	CEN, LEU2, PRPL3, TADH1	this study	F5-S2A
pDK8663	YCplac111-rpl3.K5E	CEN, LEU2, PRPL3, TADH1	this study	F5-S2A
pDK8665	YCplac111-rpl3.R4A/K5A	CEN, LEU2, PRPL3, TADH1	this study	F5-S2A
pDK8666	YCplac111-rpl3.Y6E	CEN, LEU2, PRPL3, TADH1	this study	F5-S2A
pDK8668	YCplac111-rpl3.R10E/H11E	CEN, LEU2, PRPL3, TADH1	this study	F5-S2A
pDK8669	YCplac111-rpl3.R10A/H11A	CEN, LEU2, PRPL3, TADH1	this study	F5-S2A
pDK8672	YCplac111-rpl3.H13A/L14A	CEN, LEU2, PRPL3, TADH1	this study	F5-S2A
pDK8674	YCplac111-rpl3.F16A/L17A	CEN, LEU2, PRPL3, TADH1	this study	F5-S2A
pDK8675	YCplac111-rpl3.R19A/K20A/R21A	CEN, LEU2, PRPL3, TADH1	this study	F5-S2A
pDK8676	YCplac111-rpl3.I25A/R26A	CEN, LEU2, PRPL3, TADH1	this study	F5-S2A
pDK8677	YCplac111-rpl3.R28A/K30A	CEN, LEU2, PRPL3, TADH1	this study	F5-S2A
pDK8678	YCplac111-rpl3.F32A/P33A/K34A	CEN, LEU2, PRPL3, TADH1	this study	F5-S2A
pDK8679	YCplac111-rpl3.R37A/K39A	CEN, LEU2, PRPL3, TADH1	this study	F5-S2A
pDK8680	YCplac111-rpl3.F46A/L47A	CEN, LEU2, PRPL3, TADH1	this study	F5-S2A
pBP706	pyEGFPGAC111	CEN, LEU2, PADH1, TADH1, C-terminal (GA)5-yEGFP	this study	F5-S2B
pDK8891	pADH111-RPL3.N15-(GA)5-yEGFP	CEN, LEU2, PADH1, TADH1, C-terminal (GA)5-yEGFP	this study	F5-S2B
pDK8890	pADH111-RPL3.N18-(GA)5-yEGFP	CEN, LEU2, PADH1, TADH1, C-terminal (GA)5-yEGFP	this study	F5-S2B
pDK8889	pADH111-RPL3.N23-(GA)5-yEGFP	CEN, LEU2, PADH1, TADH1, C-terminal (GA)5-yEGFP	this study	F5-S2B
pDK8888	pADH111-RPL3.N33-(GA)5-yEGFP	CEN, LEU2, PADH1, TADH1, C-terminal (GA)5-yEGFP	this study	F5-S2B
pDK8282	pADH111-RPL3.N40-(GA)5-yEGFP	CEN, LEU2, PADH1, TADH1, C-terminal (GA)5-yEGFP	this study	F5-S2B
pDK8283	pADH111-RPL3.N44-(GA)5-yEGFP	CEN, LEU2, PADH1, TADH1, C-terminal (GA)5-yEGFP	this study	F5-S2B
pDK8887	pADH111-RPL3.N48-(GA)5-yEGFP	CEN, LEU2, PADH1, TADH1, C-terminal (GA)5-yEGFP	this study	F5-S2B
pDK8902	pADH111-RPL3.N52.R4E-(GA)5-yEGFP	CEN, LEU2, PADH1, TADH1, C-terminal (GA)5-yEGFP	this study	F5-S2B
pDK8903	pADH111-RPL3.N52.K5E-(GA)5-yEGFP	CEN, LEU2, PADH1, TADH1, C-terminal (GA)5-yEGFP	this study	F5-S2B
pDK8905	pADH111-RPL3.N52.R4A/K5A-(GA)5-yEGFP	CEN, LEU2, PADH1, TADH1, C-terminal (GA)5-yEGFP	this study	F5-S2B
pDK8906	pADH111-RPL3.N52.Y6E-(GA)5-yEGFP	CEN, LEU2, PADH1, TADH1, C-terminal (GA)5-yEGFP	this study	F5-S2B
pDK8908	pADH111-RPL3.N52.R10E/H11E-(GA)5-yEGFP	CEN, LEU2, PADH1, TADH1, C-terminal (GA)5-yEGFP	this study	F5-S2B
pDK8909	pADH111-RPL3.N52.R10A/H11A-(GA)5-yEGFP	CEN, LEU2, PADH1, TADH1, C-terminal (GA)5-yEGFP	this study	F5-S2B
pDK8912	pADH111-RPL3.N52.H13A/L14A-(GA)5-yEGFP	CEN, LEU2, PADH1, TADH1, C-terminal (GA)5-yEGFP	this study	F5-S2B
pDK8914	pADH111-RPL3.N52.F16A/L17A-(GA)5-yEGFP	CEN, LEU2, PADH1, TADH1, C-terminal (GA)5-yEGFP	this study	F5-S2B
pDK8915	pADH111-RPL3.N52.R19A/K20A/R21A-(GA)5-yEGFP	CEN, LEU2, PADH1, TADH1, C-terminal (GA)5-yEGFP	this study	F5-S2B
pDK8916	pADH111-RPL3.N52.I25A/R26A-(GA)5-yEGFP	CEN, LEU2, PADH1, TADH1, C-terminal (GA)5-yEGFP	this study	F5-S2B
pDK8917	pADH111-RPL3.N52.R28A/K30A-(GA)5-yEGFP	CEN, LEU2, PADH1, TADH1, C-terminal (GA)5-yEGFP	this study	F5-S2B
pDK8918	pADH111-RPL3.N52.F32A/P33A/K34A-(GA)5-yEGFP	CEN, LEU2, PADH1, TADH1, C-terminal (GA)5-yEGFP	this study	F5-S2B
pDK8919	pADH111-RPL3.N52.R37A/K39A-(GA)5-yEGFP	CEN, LEU2, PADH1, TADH1, C-terminal (GA)5-yEGFP	this study	F5-S2B
pDK8920	pADH111-RPL3.N52.F46A/L47A-(GA)5-yEGFP	CEN, LEU2, PADH1, TADH1, C-terminal (GA)5-yEGFP	this study	F5-S2B
pDK5955	YCplac111-RRB1	CEN, LEU2, PRRB1, TADH1	Pausch et al., 2015; PMID: 26112308	F5-S2D, F7D
pDK9552	YCplac111-PRPL3-RPL3-TRPL3	CEN, LEU2, PRPL3, TRPL3	this study	F5-S2D
pDK9569	YCplac111-PRPL3-rpl3.F16A/L17A-TRPL3	CEN, LEU2, PRPL3, TRPL3	this study	F5-S2D
pDK5693	pGAL111-RRB1	CEN, LEU2, PGAL1-10, TADH1	Pausch et al., 2015; PMID: 26112308	F6
pBP290	pGAL111-ACL4	CEN, LEU2, PGAL1-10, TADH1	Pillet et al., 2015; PMID: 26447800	F6
pDK3692	pASZ11-NOP58-yEmCherry	CEN, ADE2, PNOP58, TADH1, C-terminal yEmCherry	lab plasmid	F7A, F7-S2C
pBP1195	pGAL111-RPL4A-(GA)5-yOmNG	CEN, LEU2, PGAL1-10, TADH1, C-terminal (GA)5-yOmNeonGreen	this study	F7A
pBP1194	pGAL111-rpl4a.W109C-(GA)5-yOmNG	CEN, LEU2, PGAL1-10, TADH1, C-terminal (GA)5-yOmNeonGreen	this study	F7A
pBP1193	pGAL111-rpl4a.BIV-(GA)5-yOmNG	CEN, LEU2, PGAL1-10, TADH1, C-terminal (GA)5-yOmNeonGreen	this study	F7A
pBP1125	pADH33-CAL4	CEN, URA3, PADH1, TADH1	this study	F7C, shuffle strain
pBP829	pADH33-CAF130	CEN, URA3, PADH1, TADH1	this study	F7C, shuffle strain
pDK1027	pASZ11	CEN, ADE2, empty vector	Stotz & Linder, 1990; PMID: 2253890	F7D
pDK9557	pASZ11-PADH1-CAF130	CEN, ADE2, PADH1, TADH1	this study	F7D
pDK9553	YCplac111-PRPL4B-RPL3-TRPL3	CEN, LEU2, PRPL4B, TADH1	this study	F7D
pDK8251	pGAL181-RPL26A(+intron)	2µ, LEU2, PGAL1-10, TADH1	this study	F7-S1A
pDK8246	pGAL181-RPL3	2µ, LEU2, PGAL1-10, TADH1	this study	F7-S1A
pDK8248	pGAL181-RPL4A	2µ, LEU2, PGAL1-10, TADH1	this study	F7-S1A
pDK8241	pGAL111-RPL4A	CEN, LEU2, PGAL1-10, TADH1	this study	F7-S1B
pDK8242	pGAL111-rpl4a.W109C	CEN, LEU2, PGAL1-10, TADH1	this study	F7-S1B
pDK8243	pGAL111-rpl4a.BIV	CEN, LEU2, PGAL1-10, TADH1	this study	F7-S1B
pDK8239	pGAL111-RPL3	CEN, LEU2, PGAL1-10, TADH1	this study	F7-S1C, F7-S1D
pDK9101	pGAL111-rpl3.H3E	CEN, LEU2, PGAL1-10, TADH1	this study	F7-S1C, F7-S1D
pDK9109	pGAL111-rpl3.R10A/H11A	CEN, LEU2, PGAL1-10, TADH1	this study	F7-S1C
pDK9112	pGAL111-rpl3.H13A/L14A	CEN, LEU2, PGAL1-10, TADH1	this study	F7-S1C
pDK9114	pGAL111-rpl3.F16A/L17A	CEN, LEU2, PGAL1-10, TADH1	this study	F7-S1C, F7-S1D
pDK9115	pGAL111-rpl3.R19A/K20A/R21A	CEN, LEU2, PGAL1-10, TADH1	this study	F7-S1C, F7-S1D
pDK9116	pGAL111-rpl3.I25A/R26A	CEN, LEU2, PGAL1-10, TADH1	this study	F7-S1C
pDK9117	pGAL111-rpl3.R28A/K30A	CEN, LEU2, PGAL1-10, TADH1	this study	F7-S1C
pDK9118	pGAL111-rpl3.F32A/P33A/K34A	CEN, LEU2, PGAL1-10, TADH1	this study	F7-S1C
pDK9119	pGAL111-rpl3.R37A/K39A	CEN, LEU2, PGAL1-10, TADH1	this study	F7-S1C
pDK9120	pGAL111-rpl3.F46A/L47A	CEN, LEU2, PGAL1-10, TADH1	this study	F7-S1C, F7-S1D
pDK9228	pGAL111-rpl3.H3E/F16A/L17A	CEN, LEU2, PGAL1-10, TADH1	this study	F7-S1D
pDK9229	pGAL111-rpl3.H3E/R19A/K20A/R21A	CEN, LEU2, PGAL1-10, TADH1	this study	F7-S1D
pDK9230	pGAL111-rpl3.H3E/F46A/L47A	CEN, LEU2, PGAL1-10, TADH1	this study	F7-S1D
pBP205	pGAL111-RPL4A-2xHA	CEN, LEU2, PGAL1-10, TADH1, C-terminal 2xHA	this study	F7-S2A
pBP1185	pGAL111-rpl4a.BI-2xHA	CEN, LEU2, PGAL1-10, TADH1, C-terminal 2xHA	this study	F7-S2A
pBP1188	pGAL111-rpl4a.BIV-2xHA	CEN, LEU2, PGAL1-10, TADH1, C-terminal 2xHA	this study	F7-S2A
pBP1189	pGAL111-rpl4a.W109C-2xHA	CEN, LEU2, PGAL1-10, TADH1, C-terminal 2xHA	this study	F7-S2A
pDK9201	pGAL111-RPL3-(GA)5-2xHA	CEN, LEU2, PGAL1-10, TADH1, C-terminal (GA)5-2xHA	this study	F7-S2B
pDK9202	pGAL111-rpl3.H3E-(GA)5-2xHA	CEN, LEU2, PGAL1-10, TADH1, C-terminal (GA)5-2xHA	this study	F7-S2B
pDK9204	pGAL111-rpl3.F16A/L17A-(GA)5-2xHA	CEN, LEU2, PGAL1-10, TADH1, C-terminal (GA)5-2xHA	this study	F7-S2B
pDK9205	pGAL111-rpl3.R19A/K20A/R21A-(GA)5-2xHA	CEN, LEU2, PGAL1-10, TADH1, C-terminal (GA)5-2xHA	this study	F7-S2B
pDK9208	pGAL111-rpl3.H3E/F16A/L17A-(GA)5-2xHA	CEN, LEU2, PGAL1-10, TADH1, C-terminal (GA)5-2xHA	this study	F7-S2B
pDK9209	pGAL111-rpl3.H3E/R19A/K20A/R21A-(GA)5-2xHA	CEN, LEU2, PGAL1-10, TADH1, C-terminal (GA)5-2xHA	this study	F7-S2B
pDK9211	pGAL111-RPL3-(GA)5-yOmNG	CEN, LEU2, PGAL1-10, TADH1, C-terminal (GA)5-yOmNeonGreen	this study	F7-S2C
pDK9214	pGAL111-rpl3.F16A/L17A-(GA)5-yOmNG	CEN, LEU2, PGAL1-10, TADH1, C-terminal (GA)5-yOmNeonGreen	this study	F7-S2C
pDK9218	pGAL111-rpl3.H3E/F16A/L17A-(GA)5-yOmNG	CEN, LEU2, PGAL1-10, TADH1, C-terminal (GA)5-yOmNeonGreen	this study	F7-S2C
pBP1126	pADH33-EGD1	CEN, URA3, PADH1, TADH1	this study	F7-S3F, shuffle strain
pBP1127	YCplac33-EGD2	CEN, URA3, PEGD2, TADH1	this study	F7-S3G, shuffle strain
pBP36	pHT4467Δ-RPL4A	CEN6 (instable), URA3, ADE3, PRPL4A, TADH1	Pillet et al., 2015; PMID: 26447800	shuffle strain
pBP243	YCplac33-ACL4	CEN, URA3, PACL4, TADH1	this study	shuffle strain
pDK9147	YCplac33-NOT5	CEN, URA3, PNOT5, TADH1	this study	shuffle strain
pDK1387	pHT4467Δ-RPL3	CEN6 (instable), URA3, ADE3, PRPL3, TRPL3	García-Gómez et al., 2014; PMID: 24603549	shuffle strain
pUS228	pHT4467Δ-RRB1	CEN6 (instable), URA3, ADE3, PRRB1, TADH1	Pausch et al., 2015; PMID: 26112308	shuffle strain
pDK4095	pFA6a-klURA3NPT2	PTEF-klURA3-TADH1; for genomic deletion disruption	this study
pDK538	pFA6a-HIS3MX4	for genomic deletion disruption	Longtine et al., 1998; PMID: 9717241
pDK1491	pFA6a-natNT2	for genomic deletion disruption	Janke et al., 2004; PMID: 15334558
pDK536	pFA6a-kanMX4	for genomic deletion disruption	Longtine et al., 1998; PMID: 9717241
pDK2149	pFA6a-klTRP1	for genomic deletion disruption	this study
pDK633	pFA6a-TAP-HIS3MX4	TAP, TADH1; for genomic C-terminal tagging	Pausch et al., 2015; PMID: 26112308
pDK1814	pFA6a-TAP-TCYC1-natNT2	TAP, TCYC1; for genomic C-terminal tagging	Kressler et al., 2008; PMID: 18559667
pDK632	pFA6a-TAP-kanMX4	TAP, TADH1; for genomic C-terminal tagging	this study
pDK541	pFA6a-GFP-HIS3MX4	GFP(S65T), TADH1; for genomic C-terminal tagging	Longtine et al., 1998; PMID: 9717241
pDK1815	pFA6a-GFP-TCYC1-natNT2	GFP(S65T), TCYC1; for genomic C-terminal tagging	this study
pBP1183	YCplac111-PTOM1-HIS3MX4-PGAL1-10-2HA-TOM1.N137	for integration of conditional 2xHA-TOM1 allele at the genomic locus	this study
pBP318	YCplac111-PRPL4A-RPL4A-BamHI-TRPL4A	for integration of RPL4A mutant allele at the genomic locus	this study
pBP422	YCplac111-PRPL4A-RPL4A.BI-BamHI-TRPL4A	for integration of RPL4A mutant allele at the genomic locus	this study
pBP423	YCplac111-PRPL4A-RPL4A.BII-BamHI-TRPL4A	for integration of RPL4A mutant allele at the genomic locus	this study
pBP424	YCplac111-PRPL4A-RPL4A.BIII-BamHI-TRPL4A	for integration of RPL4A mutant allele at the genomic locus	this study
pBP425	YCplac111-PRPL4A-RPL4A.BIV-BamHI-TRPL4A	for integration of RPL4A mutant allele at the genomic locus	this study
pBP317	YCplac111-PRPL4A-RPL4A.W109C-BamHI-TRPL4A	for integration of RPL4A mutant allele at the genomic locus	this study
