# Supplementary material for: Dedicated chaperones coordinate co-translational regulation of ribosomal protein production with ribosome assembly to preserve proteostasis
Source: eLife. 2022 Mar 31;11:e74255. doi: 10.7554/eLife.74255 (PMC8970588; doi:10.7554/eLife.74255)
Supplement: Supplementary file 3. [file elife-74255-supp3.xlsx]

## Sheet: Sheet1
#	run	ID	parental strain	suppressor	gene mutated	mutation	mutation DNA	accession	study	sample	experiment	unique name
1	2014	19	YKL697	S-1A	RPL4A	W109C	W109(TGG)>C(TGt)	ERR6110414	ERP130016	ERS6622132	ERX5747635	webin-reads-S1A
2	2014	20	YKL708	S-10C1	CAL4	G162V	G162(GGA)>V(GtA)	ERR6110413	ERP130016	ERS6622131	ERX5747634	webin-reads-S10C-1
3	2015	D1	YKL697	S1	CAF130	R712G	R712(AGA)>G(gGA)	ERR6110294	ERP130016	ERS6622107	ERX5747515	webin-reads-D1_S107
4	2015	D2	YKL698	S1	CAF130	T81K	T81(ACA)>K(AaA)	ERR6110311	ERP130016	ERS6622118	ERX5747532	webin-reads-D2_S118
5	2015	D3	YKL700	S1	CAF130	I389fs	I389(ATT)>(aaATT); ins AA	ERR6110359	ERP130016	ERS6622124	ERX5747580	webin-reads-D3_S129
6	2015	D4	YKL701	S1	not identified	not identified	not identified	ERR6110361	ERP130016	ERS6622125	ERX5747582	webin-reads-D4_S140
7	2015	D5	YKL703	S1	CAF130	C634*	C634(TGC)>*(TGa)	ERR6110372	ERP130016	ERS6622126	ERX5747593	webin-reads-D5_S141
8	2015	D6	YKL704	S1	CAF130	K201fs	K201(AAG)>(AG); del A	ERR6110384	ERP130016	ERS6622127	ERX5747605	webin-reads-D6_S142
9	2015	D7	YKL707	S1	CAF130	Y843*	Y843(TAT)>*(TAg)	ERR6110397	ERP130016	ERS6622128	ERX5747618	webin-reads-D7_S143
10	2015	D8	YKL708	S1	CAF130	I277fs	I277(ATA)>(taATA); ins TA	ERR6110411	ERP130016	ERS6622129	ERX5747632	webin-reads-D8_S144
11	2015	D9	YKL697	S2a	CAF130	Q898*	Q898(CAG)>*(tAG)	ERR6110412	ERP130016	ERS6622130	ERX5747633	webin-reads-D9_S145
12	2015	D10	YKL698	S2a	NOT1	I128fs	I128(GAA)>(GA); del A	ERR6110283	ERP130016	ERS6622097	ERX5747504	webin-reads-D10_S108
13	2015	D11	YKL700	S2a	CAL4	C159Y	C159(TGT)>Y(TaT)	ERR6110284	ERP130016	ERS6622098	ERX5747505	webin-reads-D11_S109
14	2015	D12	YKL701	S2b	CAF130	F977fs	F977(TTT)>(TT); del T	ERR6110285	ERP130016	ERS6622099	ERX5747506	webin-reads-D12_S110
15	2015	D13	YKL703	S2a	CAF130	I621fs	I621(ATA)>(aATA); ins A	ERR6110286	ERP130016	ERS6622100	ERX5747507	webin-reads-D13_S111
16	2015	D14	YKL704	S2a	not identified	not identified	not identified	ERR6110287	ERP130016	ERS6622101	ERX5747508	webin-reads-D14_S112
17	2015	D15	YKL707	S2a	CAF130	Y284*	Y284(TAT)>*(TAg)	ERR6110288	ERP130016	ERS6622102	ERX5747509	webin-reads-D15_S113
18	2015	D16	YKL708	S2a	CAL4	Q205P	Q205(CAG)>P(CcG)	ERR6110289	ERP130016	ERS6622103	ERX5747510	webin-reads-D16_S114
19	2015	D17	YKL697	S3a	CAF130	I455fs	I455(ATA)>(aATA); ins A	ERR6110290	ERP130016	ERS6622104	ERX5747511	webin-reads-D17_S115
20	2015	D18	YKL698	S3a	CAF130	S756P	S756(TCA)>P(cCA)	ERR6110291	ERP130016	ERS6622105	ERX5747512	webin-reads-D18_S116
21	2015	D19	YKL700	S3a	CAF130	R504fs	R504(CGT)>(GT); del C	ERR6110293	ERP130016	ERS6622106	ERX5747514	webin-reads-D19_S117
22	2015	D20	YKL701	S3a	CAF130	K897fs	K897(AAG)>(AG); del A	ERR6110295	ERP130016	ERS6622108	ERX5747516	webin-reads-D20_S119
23	2015	D21	YKL703	S3a	CAF130	G1026fs	G1026(GGC)>(GG); del C	ERR6110296	ERP130016	ERS6622109	ERX5747517	webin-reads-D21_S120
24	2015	D22	YKL704	S3a	CAF130	deletion in promoter	TACCCGG>TACCGG; del C	ERR6110297	ERP130016	ERS6622110	ERX5747518	webin-reads-D22_S121
25	2015	D23	YKL707	S3a	CAF130	A508E	A508(GCA)>E(GaA)	ERR6110298	ERP130016	ERS6622111	ERX5747519	webin-reads-D23_S122
26	2015	D24	YKL708	S3a	CAF130	I621fs	I621(ATA)>(aATA); ins A	ERR6110299	ERP130016	ERS6622112	ERX5747520	webin-reads-D24_S123
27	2015	D25	YKL697	S2b	CAF130	G873*	G873(GGA)>*(tAG)	ERR6110300	ERP130016	ERS6622113	ERX5747521	webin-reads-D25_S124
28	2015	D26	YKL697	S3c	CAF130	E820*	E820(GAA)>*(tAA)	ERR6110301	ERP130016	ERS6622114	ERX5747522	webin-reads-D26_S125
29	2015	D27	YKL698	S2b	CAF130	I848K	I848(ATA)>K(AaA)	ERR6110302	ERP130016	ERS6622115	ERX5747523	webin-reads-D27_S126
30	2015	D28	YKL698	S3c	NOT1	M1L	M1(ATG)>L(cTG)	ERR6110303	ERP130016	ERS6622116	ERX5747524	webin-reads-D28_S127
31	2015	D29	YKL701	S2c	CAF130	Y863C	Y863(TAC)>C(TgC)	ERR6110304	ERP130016	ERS6622117	ERX5747525	webin-reads-D29_S128
32	2015	D30	YKL701	S3b	CAF130	E190*	E190(GAG)>*(tAG)	ERR6110318	ERP130016	ERS6622119	ERX5747539	webin-reads-D30_S130
33	2015	D31	YKL701	S3c	CAL4	W202*	W202(TGG)>*(TGa)	ERR6110324	ERP130016	ERS6622120	ERX5747545	webin-reads-D31_S131
34	2015	D32	YKL703	S3b	CAF130	G187fs	G187(GGC)>(GC); del G	ERR6110337	ERP130016	ERS6622121	ERX5747558	webin-reads-D32_S132
35	2015	D33	YKL707	S2c	CAF130	W813R	W813(TGG)>R(aGG)	ERR6110343	ERP130016	ERS6622122	ERX5747564	webin-reads-D33_S133
36	2015	D34	YKL708	S3b	CAF130	I621fs	I621(ATA)>(aATA); ins A	ERR6110347	ERP130016	ERS6622123	ERX5747568	webin-reads-D34_S134
37	2015	B1	YBP98	1-S3	CAF130	E453*	E(GAA)>*(tAA)	ERR6109910	ERP130016	ERS6622087	ERX5747131	webin-reads-B1_S91
38	2015	B2	YBP98	3-S3b	NOT1	L112*	L112(TTG)>*(TaG)	ERR6109911	ERP130016	ERS6622088	ERX5747132	webin-reads-B2_S99
39	2015	B3	YBP98	4-S3b	CAF130	∆L354/∆F355	T/CTT/TTT/C>TC; del CTT/TTT	ERR6109912	ERP130016	ERS6622089	ERX5747133	webin-reads-B3_S100
40	2015	B4	YBP98	5-S2b	CAF130	P1064fs	P1064(CCT)>(CT); del C	ERR6110275	ERP130016	ERS6622090	ERX5747496	webin-reads-B4_S101
41	2015	B5	YBP98	6-S1	CAF130	E836K	E836(GAA)>K(aAA)	ERR6110276	ERP130016	ERS6622091	ERX5747497	webin-reads-B5_S102
42	2015	B6	YBP98	7-S2a	NOT1	K21fs	K21(AAA)>(AA); del A	ERR6110277	ERP130016	ERS6622092	ERX5747498	webin-reads-B6_S103
43	2015	B7	YBP98	7-S2b	CAF130	G789*	G789(GGA)>*(tGA)	ERR6110278	ERP130016	ERS6622093	ERX5747499	webin-reads-B7_S104
44	2015	B8	YBP98	8-S2	CAF130	Y863*	Y863(TAC)>*(TAa)	ERR6110279	ERP130016	ERS6622094	ERX5747500	webin-reads-B8_S105
45	2015	B9	YBP104	1-S3a	CAF130	Y810fs	Y810(TAT)>(AT); del T	ERR6110280	ERP130016	ERS6622095	ERX5747501	webin-reads-B9_S106
46	2015	B10	YBP104	1-S3b	CAL4	L208P	L208(CTT)>P(CcT)	ERR6109902	ERP130016	ERS6622080	ERX5747123	webin-reads-B10_S92
47	2015	B11	YBP104	4-S3a	CAF130	G842V	G842(GGT)>V(GtT)	ERR6109903	ERP130016	ERS6622081	ERX5747124	webin-reads-B11_S93
48	2015	B12	YBP104	4-S3b	CAF130	G842V	G842(GGT)>V(GtT)	ERR6109904	ERP130016	ERS6622082	ERX5747125	webin-reads-B12_S94
49	2015	B13	YBP104	6-S1	CAL4	Q62fs	Q62(CAA)>Q(CAAa); ins A	ERR6109905	ERP130016	ERS6622083	ERX5747126	webin-reads-B13_S95
50	2015	B14	YBP104	7-S1	CAL4	L170fs	L170(TTG)>(TG); del T	ERR6109907	ERP130016	ERS6622084	ERX5747128	webin-reads-B14_S96
51	2015	B15	YBP104	8-S1c	CAF130	Q265*	Q265(CAA)>*(tAA)	ERR6109908	ERP130016	ERS6622085	ERX5747129	webin-reads-B15_S97
52	2015	B16	YBP104	8-S2	CAF130	Q364*	Q364(CAG)>*(tAG)	ERR6109909	ERP130016	ERS6622086	ERX5747130	webin-reads-B16_S98
53	2016	BNS5	YBP255	BNS5	CAF130	P998L	P998(CCT)>L(CtT)	ERR6110282	ERP130016	ERS6622096	ERX5747503	webin-reads-BNS5
