# Supplementary material for: Dedicated chaperones coordinate co-translational regulation of ribosomal protein production with ribosome assembly to preserve proteostasis
Source: eLife. 2022 Mar 31;11:e74255. doi: 10.7554/eLife.74255 (PMC8970588; doi:10.7554/eLife.74255)
Supplement: Supplementary file 4. [file elife-74255-supp4.xlsx]

## Sheet: acl4_WT
ID	baseMean	log2FoldChange	lfcSE	stat	pvalue	padj	external_gene_name	description
YHR054C	26.042	-0.161153	0.203399	-0.698734	0.484718	0.610341	YHR054C	Putative protein of unknown function; partial duplicate of RSC30/YHR056C, truncated remnant of segmental duplication [Source:SGD;Acc:S000001096]
YGR137W	28.3133	0.0199043	0.203399	0.0932287	0.925722	0.952503	YGR137W	Dubious open reading frame; unlikely to encode a functional protein, based on available experimental and comparative sequence data [Source:SGD;Acc:S000003369]
YMR320W	24.1016	0.0456737	0.203397	0.126526	0.899316	0.93476	YMR320W	Putative protein of unknown function; conserved among S. cerevisiae strains; YMR320W is not an essential gene [Source:SGD;Acc:S000004939]
YBR292C	26.8561	-0.223019	0.203395	-1.09664	0.272797	0.394409	YBR292C	Putative protein of unknown function; conserved across S. cerevisiae strains; YBR292C is not an essential gene [Source:SGD;Acc:S000000496]
YLR108C	206.906	-0.0916625	0.203392	-0.626004	0.531312	0.652376	YLR108C	Protein of unknown function; green fluorescent protein (GFP)-fusion protein localizes to the nucleus; YLR108C is not an esssential gene; protein abundance increases in response to DNA replication stress; YLR108C has a paralog, YDR132C, that arose from the whole genome duplication [Source:SGD;Acc:S000004098]
snR39	63.7712	-0.274212	0.20339	-1.25932	0.207914	0.320895	snR39	C/D box small nucleolar RNA (snoRNA); guides 2'-O-methylation of large subunit (LSU) rRNA at position A807 [Source:SGD;Acc:S000007302]
YDL021W	34.4121	0.203035	0.203389	1.03241	0.30188	0.428624	GPM2	Homolog of Gpm1p phosphoglycerate mutase; converts 3-phosphoglycerate to 2-phosphoglycerate in glycolysis; may be non-functional; GPM2 has a paralog, GPM3, that arose from the whole genome duplication [Source:SGD;Acc:S000002179]
YOR381W-A	16.9073	0.0273457	0.203383	0.140123	0.888562	0.928234	YOR381W-A	Putative protein of unknown function; identified by fungal homology and RT-PCR [Source:SGD;Acc:S000028587]
snR18	26.3847	-0.267575	0.203381	-1.35548	0.175264	0.279835	snR18	C/D box small nucleolar RNA (snoRNA); commonly referred to as U18; guides 2'-O-methylation of large subunit (LSU) rRNA at positions A649 and C650 [Source:SGD;Acc:S000007500]
YLR286W-A	29.9975	0.262875	0.203373	1.22743	0.219662	0.33484	YLR286W-A	Dubious open reading frame; unlikely to encode a functional protein, based on available experimental and comparative sequence data; overlaps the verified gene CTS1 [Source:SGD;Acc:S000028679]
YMR151W	18.0735	-0.0171803	0.203372	-0.0609359	0.95141	0.96944	YIM2	Dubious open reading frame; unlikely to encode a functional protein, based on available experimental and comparative sequence data; not conserved in closely related Saccharomyces species; 5% of ORF overlaps the verified gene IMP1 [Source:SGD;Acc:S000004759]
YOL085W-A	17.0099	0.219611	0.203363	1.0872	0.27695	0.399067	YOL085W-A	Dubious open reading frame; unlikely to encode a functional protein, based on available experimental and comparative sequence data; partially overlaps the dubious ORF YOL085C [Source:SGD;Acc:S000028708]
YNL057W	16.2241	0.00722641	0.203363	-0.0022839	0.998178	0.998178	YNL057W	Dubious open reading frame; unlikely to encode a functional protein, based on available experimental and comparative sequence data [Source:SGD;Acc:S000005002]
YNL097C-B	61.6175	-0.641229	0.203361	-3.26232	0.00110503	0.00383412	YNL097C-B	Putative protein of unknown function [Source:SGD;Acc:S000028699]
YGR225W	16.4346	-0.09623	0.203358	-0.472576	0.636516	0.742366	AMA1	Activator of meiotic anaphase promoting complex (APC/C); Cdc20p family member; required for initiation of spore wall assembly; required for Clb1p degradation during meiosis; prevents premature assembly of the meiosis I spindle, required for DSB induced prophase I arrest [Source:SGD;Acc:S000003457]
YER188C-A	20.5897	-0.0989275	0.203352	-0.493557	0.621619	0.730211	YER188C-A	Putative protein of unknown function [Source:SGD;Acc:S000028764]
YPR160C-A	21.5934	-0.240622	0.203351	-1.18392	0.236445	0.353152	YPR160C-A	Protein of unknown function; identified by gene-trapping, microarray-based expression analysis, and genome-wide homology searching [Source:SGD;Acc:S000028726]
YCR020W-B	309.4	0.452633	0.203349	2.03611	0.0417397	0.085937	HTL1	Component of the RSC chromatin remodeling complex; RSC functions in transcriptional regulation and elongation, chromosome stability, and establishing sister chromatid cohesion; involved in telomere maintenance [Source:SGD;Acc:S000006439]
YPL278C	21.5532	0.25457	0.203339	1.26826	0.204705	0.316925	YPL278C	Putative protein of unknown function; gene expression regulated by copper levels [Source:SGD;Acc:S000006199]
YLR227W-B	16.0708	0.0155357	0.203337	0.056051	0.955301	0.971672	YLR227W-B	Retrotransposon TYA Gag and TYB Pol genes; transcribed/translated as one unit; polyprotein is processed to make a nucleocapsid-like protein (Gag), reverse transcriptase (RT), protease (PR), and integrase (IN); similar to retroviral genes [Source:SGD;Acc:S000007376]
YMR018W	25.8366	0.0868354	0.203336	0.473951	0.635535	0.741575	PEX9	Putative protein of unknown function with similarity to human PEX5Rp; transcription increases during colony development similar to genes involved in peroxisome biogenesis; YMR018W is not an essential gene; PEX5Rp is also known as peroxin protein 5 related protein [Source:SGD;Acc:S000004620]
YCR024C-B	1173.01	0.552189	0.203335	2.47735	0.0132362	0.0325171	YCR024C-B	Putative protein of unknown function; identified by expression profiling and mass spectrometry [Source:SGD;Acc:S000028818]
YBR032W	27.1075	0.260434	0.203331	1.25256	0.210365	0.323383	YBR032W	Putative protein of unknown function; conserved among S. cerevisiae strains; YBR032W is not an essential gene [Source:SGD;Acc:S000000236]
tG(GCC)D2	18.7129	0.473532	0.20333	2.04495	0.0408595	0.0845396	tG(GCC)D2	Glycine tRNA (tRNA-Gly), predicted by tRNAscan-SE analysis [Source:SGD;Acc:S000006577]
YBL026W	767.589	0.310568	0.203326	1.38481	0.16611	0.26925	LSM2	Lsm (Like Sm) protein; part of heteroheptameric complexes (Lsm2p-7p and either Lsm1p or 8p): cytoplasmic Lsm1p complex involved in mRNA decay; nuclear Lsm8p complex part of U6 snRNP and possibly involved in processing tRNA, snoRNA, and rRNA; relocalizes from nucleus to cytoplasmic foci upon DNA replication stress [Source:SGD;Acc:S000000122]
YMR279C	14.1666	0.222489	0.203324	1.07234	0.283568	0.406001	YMR279C	Putative boron transporter involved in boron efflux and resistance; overexpression mutant but not null mutant displays boron tolerance phenotype; identified as a heat-induced gene in a high-throughout screen; YMR279C is not an essential gene; YMR279C has a paralog, ATR1, that arose from the whole genome duplication [Source:SGD;Acc:S000004892]
snR66	22.1921	0.21276	0.203324	1.0454	0.295837	0.421171	snR66	C/D box small nucleolar RNA (snoRNA); guides 2'-O-methylation of large subunit (LSU) rRNA at position U2417 [Source:SGD;Acc:S000006457]
YFL052W	16.3957	0.308021	0.203322	1.51144	0.130676	0.221214	YFL052W	Zinc cluster transcription factor that regulates respiratory growth; binds to promoters of genes involved in respiration, gluconeogenesis, and the glyoxylate shunt; required for normal carbon source utilization and stress response [Source:SGD;Acc:S000001842]
YOR339C	19.5432	0.0059834	0.203322	0.0118454	0.990549	0.993548	UBC11	Ubiquitin-conjugating enzyme; most similar in sequence to Xenopus ubiquitin-conjugating enzyme E2-C, but not a true functional homolog of this E2; unlike E2-C, not required for the degradation of mitotic cyclin Clb2 [Source:SGD;Acc:S000005866]
snR11	51.327	0.0827277	0.20332	0.31239	0.754744	0.839583	snR11	H/ACA box small nucleolar RNA (snoRNA); guides pseudouridylation of large subunit (LSU) rRNA at position U2416 [Source:SGD;Acc:S000007293]
YFR032C	33.5705	-0.0909926	0.203314	-0.480756	0.63069	0.738034	RRT5	Putative protein of unknown function; non-essential gene identified in a screen for mutants with increased levels of rDNA transcription; expressed at high levels during sporulation [Source:SGD;Acc:S000001928]
YIR019C	261.33	-0.345121	0.203313	-1.91969	0.0548976	0.108622	YIR019C	GPI-anchored cell surface glycoprotein (flocculin); required for pseudohyphal and invasive growth, flocculation, and biofilm formation; major determinant of colony morphology; transcription regulated by the MAPK pathway (Ste12p and Tec1p) and the cAMP pathway (Flo8p); required for formation of fibrous interconnections between cells of a wild strain; role in co-flocculation with other yeast specie…
YPL240C	2487.28	0.125772	0.20331	0.670895	0.502287	0.627884	HSP82	Hsp90 chaperone; redundant in function with Hsc82p; required for pheromone signaling, negative regulation of Hsf1p; docks with Tom70p for mitochondrial preprotein delivery; promotes telomerase DNA binding, nucleotide addition; protein abundance increases in response to DNA replication stress; contains two acid-rich unstructured regions that promote solubility of chaperone-substrate complexes; HSP…
YJL215C	39.1565	0.0990068	0.20331	0.442966	0.65779	0.761194	YJL215C	Dubious open reading frame; unlikely to encode a functional protein, based on available experimental and comparative sequence data [Source:SGD;Acc:S000003751]
YIL037C	17.1395	0.435725	0.203309	1.92482	0.0542519	0.107547	PRM2	Pheromone-regulated protein; predicted to have 4 transmembrane segments and a coiled coil domain; regulated by Ste12p; required for efficient nuclear fusion [Source:SGD;Acc:S000001299]
YLR463C	21.0002	0.120195	0.203305	0.671205	0.50209	0.627762	YLR463C	Dubious open reading frame; unlikely to encode a functional protein, based on available experimental and comparative sequence data; overlaps the uncharacterized ORFs YLR462W and YLR464W [Source:SGD;Acc:S000004455]
YNR056C	26.9975	0.0863132	0.203303	0.435028	0.663542	0.766036	BIO5	Putative transmembrane protein involved in the biotin biosynthesis; responsible for uptake of 7-keto 8-aminopelargonic acid; BIO5 is in a cluster of 3 genes (BIO3, BIO4, and BIO5) that mediate biotin synthesis [Source:SGD;Acc:S000005339]
YGL158W	24.8606	0.221824	0.203303	1.09749	0.272425	0.394081	RCK1	Protein kinase involved in oxidative stress response; promotes pseudohyphal growth via activation of Ubp3p phosphorylation; identified as suppressor of S. pombe cell cycle checkpoint mutations; RCK1 has a paralog, RCK2, that arose from the whole genome duplication [Source:SGD;Acc:S000003126]
YFL065C	29.6131	-0.369544	0.203301	-1.78686	0.0739599	0.138791	YFL065C	Putative protein of unknown function; induced by treatment with 8-methoxypsoralen and UVA irradiation [Source:SGD;Acc:S000001829]
YFL058W	19.8583	0.509458	0.203289	2.42358	0.0153686	0.036966	THI5	Protein involved in synthesis of the thiamine precursor HMP; member of a subtelomeric gene family including THI5, THI11, THI12, and THI13; hydroxymethylpyrimidine is also known as HMP [Source:SGD;Acc:S000001836]
YBR301W	20.7159	-0.50784	0.203268	-2.61279	0.00898053	0.0233719	PAU24	Cell wall mannoprotein; has similarity to Tir1p, Tir2p, Tir3p, and Tir4p; member of the seripauperin multigene family encoded mainly in subtelomeric regions; expressed under anaerobic conditions, completely repressed during aerobic growth [Source:SGD;Acc:S000000505]
YJL045W	25.7986	-0.0496514	0.203264	-0.371846	0.710007	0.805622	YJL045W	Minor succinate dehydrogenase isozyme; participates in oxidation of succinate and transfer of electrons to ubiquinone; induced during the diauxic shift in a Cat8p-dependent manner; YJL045W has a paralog, SDH1, that arose from the whole genome duplication [Source:SGD;Acc:S000003581]
YPL223C	31.3401	0.602724	0.203262	2.49931	0.0124436	0.0308226	GRE1	Hydrophilin essential in desiccation-rehydration process; stress induced (osmotic, ionic, oxidative, heat shock and heavy metals); regulated by the HOG pathway; GRE1 has a paralog, SIP18, that arose from the whole genome duplication [Source:SGD;Acc:S000006144]
YFL064C	32.6215	-0.378664	0.203258	-1.92799	0.053856	0.106863	YFL064C	Putative protein of unknown function [Source:SGD;Acc:S000001830]
YLR030W	22.9123	0.0483016	0.203258	0.245213	0.806292	0.874953	YLR030W	Putative protein of unknown function; S288C contains an in-frame stop codon between ORFs YLR030W and YLR031W [Source:SGD;Acc:S000004020]
YDR246W-A	22.72	-0.0419252	0.203253	-0.212971	0.83135	0.892921	YDR246W-A	Putative protein of unknown function; identified by fungal homology and RT-PCR [Source:SGD;Acc:S000028542]
YPR160W	139.38	0.772334	0.203251	3.41997	0.000626279	0.00232726	GPH1	Glycogen phosphorylase required for the mobilization of glycogen; non-essential; regulated by cyclic AMP-mediated phosphorylation; phosphorylation by Cdc28p may coordinately regulate carbohydrate metabolism and the cell cycle; expression is regulated by stress-response elements and by the HOG MAP kinase pathway [Source:SGD;Acc:S000006364]
YJL119C	26.7434	0.130165	0.203251	0.600576	0.548122	0.667289	YJL119C	Dubious open reading frame; unlikely to encode a functional protein, based on available experimental and comparative sequence data [Source:SGD;Acc:S000003655]
YHR139C	24.7484	0.528548	0.203245	2.5437	0.0109687	0.0276257	SPS100	Protein required for spore wall maturation; expressed during sporulation; may be a component of the spore wall; expression also induced in cells treated with the mycotoxin patulin; SPS100 has a paralog, YGP1, that arose from the whole genome duplication [Source:SGD;Acc:S000001181]
YPR054W	16.9112	-0.176577	0.203243	-0.894822	0.370882	0.501123	SMK1	Middle sporulation-specific mitogen-activated protein kinase (MAPK); required for production of the outer spore wall layers; negatively regulates activity of the glucan synthase subunit Gsc2p [Source:SGD;Acc:S000006258]
YNL332W	37.6731	0.463033	0.203227	2.15882	0.0308638	0.0667778	THI12	Protein involved in synthesis of the thiamine precursor HMP; member of a subtelomeric gene family including THI5, THI11, THI12, and THI13; hydroxymethylpyrimidine is also known as HMP [Source:SGD;Acc:S000005276]
YPR202W	48.424	-0.361693	0.203216	-1.84156	0.0655399	0.125473	YPR202W	Putative protein of unknown function; similar to telomere-encoded helicases; down-regulated at low calcium levels; YPR202W is not an essential gene; transcript is predicted to be spliced but there is no evidence that it is spliced in vivo [Source:SGD;Acc:S000006406]
YOR237W	19.5608	-0.701634	0.203208	-3.42325	0.000618763	0.00230784	HES1	Protein implicated in the regulation of ergosterol biosynthesis; one of a seven member gene family with a common essential function and non-essential unique functions; similar to human oxysterol binding protein (OSBP); SWAT-GFP and mCherry fusion proteins localize to the bud neck and vacuolar membrane; HES1 has a paralog, KES1, that arose from the whole genome duplication [Source:SGD;Acc:S0000057…
YBR018C	21.9668	0.35665	0.203208	1.73837	0.082146	0.150788	GAL7	Galactose-1-phosphate uridyl transferase; synthesizes glucose-1-phosphate and UDP-galactose from UDP-D-glucose and alpha-D-galactose-1-phosphate in the second step of galactose catabolism; human homolog UGP2 can complement yeast null mutant [Source:SGD;Acc:S000000222]
snR47	31.6547	0.280498	0.203207	1.30608	0.191527	0.300841	snR47	C/D box small nucleolar RNA (snoRNA); guides 2'-O-methylation of large subunit (LSU) rRNA at position A2220 and small subunit (SSU) rRNA at position A619 [Source:SGD;Acc:S000006507]
YOR161C-C	16.2315	0.100922	0.203194	0.490176	0.624009	0.732062	YOR161C-C	Protein of unknown function; identified by gene-trapping, microarray-based expression analysis, and genome-wide homology searching [Source:SGD;Acc:S000028712]
snR71	20.5839	0.518222	0.203171	2.36505	0.0180279	0.0422755	snR71	C/D box small nucleolar RNA (snoRNA); guides 2'-O-methylation of large subunit (LSU) rRNA at position A2946 [Source:SGD;Acc:S000006462]
YDR018C	22.157	0.430312	0.203165	1.95039	0.0511298	0.102162	YDR018C	Probable membrane protein with three predicted transmembrane domains; similar to C. elegans F55A11.5 and maize 1-acyl-glycerol-3-phosphate acyltransferase; YDR018C has a paralog, CST26, that arose from the whole genome duplication [Source:SGD;Acc:S000002425]
YLR329W	24.3521	0.394116	0.203162	1.89741	0.0577745	0.113083	REC102	Protein involved in early stages of meiotic recombination; required for chromosome synapsis; forms a complex with Rec104p and Spo11p necessary during the initiation of recombination [Source:SGD;Acc:S000004321]
snR34	25.0446	0.387574	0.20314	1.73479	0.0827772	0.15159	snR34	H/ACA box small nucleolar RNA (snoRNA); guides pseudouridylation of large subunit (LSU) rRNA at positions U2826 and U2880 [Source:SGD;Acc:S000006500]
YDR253C	36.3454	0.225293	0.203123	1.09073	0.275392	0.397276	MET32	Zinc-finger DNA-binding transcription factor; involved in transcriptional regulation of the methionine biosynthetic genes; targets strong transcriptional activator Met4p to promoters of sulfur metabolic genes; feedforward loop exists in the regulation of genes controlled by Met4p and Met32p; lack of such a loop for MET31 may account for the differential actions of Met32p and Met31p; MET32 has a p…
YPR007C	35.1749	0.730552	0.2031	3.2269	0.00125139	0.0042736	REC8	Meiosis-specific component of the sister chromatid cohesion complex; alpha-kleisin family member that maintains cohesion between sister chromatids during meiosis I; maintains cohesion between centromeres of sister chromatids until meiosis II; independent of its role in sister chromatid cohesion, Rec8p promotes allelic collisions and prevents nonspecific chromosome interactions; homolog of S. pomb…
YOR366W	14.7395	-0.0807415	0.203096	-0.332159	0.73977	0.827753	YOR366W	Dubious open reading frame; unlikely to encode a functional protein, based on available experimental and comparative sequence data; partially overlaps the uncharacterized ORF YOR365C [Source:SGD;Acc:S000005893]
YEL070W	18.4449	0.0215514	0.203096	0.0847718	0.932443	0.957233	DSF1	Mannitol dehydrogenase; deletion suppresses mutation of mpt5; DSF1 has a paralog, MAN2, that arose from a segmental duplication [Source:SGD;Acc:S000000796]
YFR012W	14.4732	0.256809	0.203091	1.25225	0.210478	0.323425	DCV1	Protein of unknown function; deletion mutant shows strong genetic interaction with cdc28-as1 mutant in the presence of 1-NM-PP1; DCV1 has a paralog, YOL019W, that arose from the whole genome duplication [Source:SGD;Acc:S000001908]
snR44	373.77	-0.556865	0.203088	-2.83529	0.00457844	0.0130451	snR44	H/ACA box small nucleolar RNA (snoRNA); guides pseudouridylation of large subunit (LSU) rRNA at position U1056 and small subunit (SSU) rRNA at position U106 [Source:SGD;Acc:S000006504]
YOR242C	34.7103	0.237896	0.203083	1.0215	0.307015	0.434725	SSP2	Sporulation specific protein that localizes to the spore wall; required for sporulation at a point after meiosis II and during spore wall formation; expression controlled by a tightly regulated middle-meiotic promoter that is activated by Ndt80p; translation of SSP2 mRNA is delayed, such that the mRNA is present as nuclear divisions are taking place but is not engaged by ribosomes until relativel…
YGL249W	24.0619	0.385766	0.203065	1.82983	0.0672748	0.128195	ZIP2	Meiosis-specific protein; involved in normal synaptonemal complex formation and pairing between homologous chromosomes during meiosis; relocalizes from mitochondrion to cytoplasm upon DNA replication stress [Source:SGD;Acc:S000003218]
YKR075W-A	15.6809	0.0280129	0.203045	0.114618	0.908748	0.941764	YKR075W-A	Dubious open reading frame unlikely to encode a protein; completely overlaps the uncharacterized gene YKR075C; identified by gene-trapping, microarray-based expression analysis, and genome-wide homology searching [Source:SGD;Acc:S000028669]
YFL066C	312.529	-0.409435	0.203027	-2.10308	0.0354591	0.074993	YFL066C	Helicase-like protein encoded within the telomeric Y' element; induced by treatment with 8-methoxypsoralen and UVA irradiation; SWAT-GFP and mCherry fusion proteins localize to the nucleus [Source:SGD;Acc:S000001828]
YDR535C	33.444	0.0688373	0.203013	0.259334	0.795378	0.865659	YDR535C	Dubious open reading frame; unlikely to encode a functional protein, based on available experimental and comparative sequence data; YDR535C is not an essential gene [Source:SGD;Acc:S000002943]
YMR194C-B	35.0459	0.724831	0.203011	3.26039	0.00111259	0.00385607	CMC4	Protein that localizes to the mitochondrial intermembrane space; localizes via the Mia40p-Erv1p system; contains twin cysteine-x(9)-cysteine motifs [Source:SGD;Acc:S000028514]
YNL043C	16.4881	0.346791	0.202989	1.67319	0.0942905	0.169561	YNL043C	Dubious open reading frame; unlikely to encode a functional protein, based on available experimental and comparative sequence data; partially overlaps the verified gene YIP3/YNL044W [Source:SGD;Acc:S000004988]
YNL018C	33.2305	-0.856452	0.202927	-4.55936	5.13096e-06	3.15991e-05	YNL018C	Putative protein of unknown function; YNL018C has a paralog, YNL034W, that arose from a segmental duplication [Source:SGD;Acc:S000004963]
YEL033W	28.5808	0.0738333	0.202923	0.315711	0.752222	0.837665	MTC7	Protein of unknown function; predicted metabolic role based on network analysis derived from ChIP experiments, a large-scale deletion study and localization of transcription factor binding sites; null mutant is sensitive to temperature oscillation in a cdc13-1 mutant [Source:SGD;Acc:S000000759]
tN(GUU)P	25.5007	1.63031	0.202917	6.78142	1.19002e-11	1.9156e-10	tN(GUU)P	Asparagine tRNA (tRNA-Asn), predicted by tRNAscan-SE analysis [Source:SGD;Acc:S000006677]
YOR161W-B	23.9438	-1.05737	0.202904	-5.52052	3.38002e-08	3.06099e-07	YOR161W-B	Protein of unknown function; identified by gene-trapping, microarray-based expression analysis, and genome-wide homology searching [Source:SGD;Acc:S000028714]
YAR030C	14.8051	-0.140446	0.202823	-0.690961	0.48959	0.615189	YAR030C	Dubious open reading frame; unlikely to encode a functional protein, based on available experimental and comparative sequence data; partially overlaps the uncharacterized ORF YAR029W and the verified gene PRM9 [Source:SGD;Acc:S000001821]
YBL111C	18.6113	-0.36093	0.20282	-1.82135	0.0685538	0.130238	YBL111C	Helicase-like protein encoded within the telomeric Y' element; relocalizes from mitochondrion to cytoplasm upon DNA replication stress [Source:SGD;Acc:S000002151]
snR17a	19.0573	-0.53561	0.202818	-2.6439	0.00819568	0.0215831	snR17a	Small nucleolar RNA (snoRNA) U3; part of Small ribosomal SubUnit (SSU) processosome; SNR17B also encodes snoRNA U3 [Source:SGD;Acc:S000007294]
snR5	28.1332	-0.0292079	0.202811	-0.132517	0.894575	0.931578	snR5	H/ACA box small nucleolar RNA (snoRNA); guides pseudouridylation of large subunit (LSU) rRNA at positions U1004 and U1124 [Source:SGD;Acc:S000007291]
YLL066C	60.0861	-0.287127	0.202804	-1.53537	0.124692	0.213438	YLL066C	Putative Y' element ATP-dependent helicase; YLL066C is not an essential gene [Source:SGD;Acc:S000003989]
SCR1	49.185	-0.450532	0.202792	-2.38535	0.0170627	0.0403125	SCR1	RNA subunit of the Signal Recognition Particle (SRP) [Source:SGD;Acc:S000006491]
YPL130W	16.8005	0.406762	0.202789	1.87542	0.0607343	0.117784	SPO19	Meiosis-specific prospore protein; required to produce bending force necessary for proper assembly of the prospore membrane during sporulation; identified as a weak high-copy suppressor of the spo1-1 ts mutation; SPO19 has a paralog, YOR214C, that arose from the whole genome duplication [Source:SGD;Acc:S000006051]
YPR192W	31.0902	-0.694286	0.202786	-3.78558	0.000153351	0.000662906	AQY1	Spore-specific water channel; mediates the transport of water across cell membranes, developmentally controlled; may play a role in spore maturation, probably by allowing water outflow, may be involved in freeze tolerance [Source:SGD;Acc:S000006396]
YBR033W	24.4356	0.202475	0.202767	0.870022	0.384288	0.514729	EDS1	Putative zinc cluster protein, predicted to be a transcription factor; not an essential gene; EDS1 has a paralog, RGT1, that arose from the whole genome duplication [Source:SGD;Acc:S000000237]
YDR401W	25.4822	-0.238705	0.202754	-1.20204	0.229348	0.345091	YDR401W	Dubious open reading frame; unlikely to encode a functional protein, based on available experimental and comparative sequence data [Source:SGD;Acc:S000002809]
YDL232W	737.938	-0.00739423	0.202744	-0.0465865	0.962843	0.975688	OST4	Subunit of the oligosaccharyltransferase complex of the ER lumen; complex catalyzes protein asparagine-linked glycosylation; type I membrane protein required for incorporation of Ost3p or Ost6p into the OST complex [Source:SGD;Acc:S000002391]
YGR294W	15.4063	0.000325361	0.20274	0.0216077	0.982761	0.987783	PAU12	Protein of unknown function; member of the seripauperin multigene family encoded mainly in subtelomeric regions; SWAT-GFP fusion protein localizes to both the endoplasmic reticulum and vacuole [Source:SGD;Acc:S000003526]
YKR012C	28.8869	0.00421552	0.202736	-0.0453805	0.963804	0.975898	YKR012C	Dubious open reading frame; unlikely to encode a functional protein, based on available experimental and comparative sequence data; partially overlaps the verified gene PRY2 [Source:SGD;Acc:S000001720]
YKL221W	13.8441	-0.108287	0.202733	-0.471754	0.637102	0.74276	MCH2	Protein with similarity to mammalian monocarboxylate permeases; monocarboxylate permeases are involved in transport of monocarboxylic acids across the plasma membrane but mutant is not deficient in monocarboxylate transport [Source:SGD;Acc:S000001704]
snR46	165.349	0.979938	0.20273	4.14268	3.43269e-05	0.000176515	snR46	H/ACA box small nucleolar RNA (snoRNA); guides pseudouridylation of large subunit (LSU) rRNA at position U2865 [Source:SGD;Acc:S000006506]
YGL081W	26.9355	0.148938	0.202725	0.620648	0.534831	0.655197	YGL081W	Putative protein of unknown function; non-essential gene; interacts genetically with CHS5, a gene involved in chitin biosynthesis [Source:SGD;Acc:S000003049]
YDR119W-A	25.0005	1.51856	0.202719	6.13524	8.50301e-10	1.00787e-08	COX26	Stabilizes or regulates formation of respiratory chain supercomplexes composed of Complex III (ubiquinol-cytochrome c reductase) and Complex IV (cytochrome c oxidase) [Source:SGD;Acc:S000113555]
YDR365W-B	18.1477	-0.130622	0.202716	-0.657468	0.51088	0.635345	YDR365W-B	Retrotransposon TYA Gag and TYB Pol genes; transcribed/translated as one unit; polyprotein is processed to make a nucleocapsid-like protein (Gag), reverse transcriptase (RT), protease (PR), and integrase (IN); similar to retroviral genes [Source:SGD;Acc:S000007401]
YGL051W	12.426	0.581107	0.202688	2.5979	0.00937955	0.0241847	MST27	Putative integral membrane protein, involved in vesicle formation; forms complex with Mst28p; member of DUP240 gene family; binds COPI and COPII vesicles; MST27 has a paralog, MST28, that arose from a segmental duplication [Source:SGD;Acc:S000003019]
YOR041C	13.1295	1.01341	0.202688	4.2125	2.52557e-05	0.00013437	YOR041C	Dubious open reading frame; unlikely to encode a functional protein, based on available experimental and comparative sequence data; not conserved in closely related Saccharomyces species; 85% of ORF overlaps the uncharacterized gene CUE5; deletion in cyr1 mutant results in loss of stress resistance [Source:SGD;Acc:S000005567]
YHL046C	16.7799	-0.148786	0.202679	-0.722246	0.470143	0.597191	PAU13	Protein of unknown function; member of the seripauperin multigene family encoded mainly in subtelomeric regions; expression is induced after ethanol shock; SWAT-GFP and mCherry fusion proteins localize to the endoplasmic reticulum and vacuole respectively [Source:SGD;Acc:S000001038]
YML100W-A	18.6093	-0.0378408	0.202677	-0.210286	0.833445	0.894408	YML100W-A	Putative protein of unknown function; identified by gene-trapping, microarray-based expression analysis, and genome-wide homology searching [Source:SGD;Acc:S000028688]
YDR223W	34.9577	-0.0845977	0.202655	-0.442988	0.657774	0.761194	CRF1	Transcriptional corepressor; involved in repression of ribosomal protein (RP) gene transcription via the TOR signaling pathway which promotes accumulation of Crf1p in the nucleus; role in repression of RP genes varies by strain; CRF1 has a paralog, IFH1, that arose from the whole genome duplication [Source:SGD;Acc:S000002631]
YNL162W-A	242.605	0.47596	0.20265	2.10138	0.0356078	0.0752317	YNL162W-A	Putative protein of unknown function; identified by homology [Source:SGD;Acc:S000007624]
YLR327C	83.3981	0.632607	0.20262	2.54612	0.0108929	0.0274568	TMA10	Protein of unknown function that associates with ribosomes; protein abundance increases in response to DNA replication stress; TMA10 has a paralog, STF2, that arose from the whole genome duplication [Source:SGD;Acc:S000004319]
YDL172C	24.7048	-0.241211	0.202597	-1.30288	0.192616	0.302175	YDL172C	Dubious open reading frame; unlikely to encode a functional protein, based on available experimental and comparative sequence data [Source:SGD;Acc:S000002331]
YGR182C	115.837	0.393336	0.202593	1.82045	0.0686902	0.130447	YGR182C	Dubious open reading frame; unlikely to encode a functional protein, based on available experimental and comparative sequence data; partially overlaps the verified ORF TIM13/YGR181W [Source:SGD;Acc:S000003414]
YPR099C	16.8254	0.0399692	0.202585	0.213148	0.831212	0.892921	YPR099C	Dubious open reading frame; unlikely to encode a functional protein, based on available experimental and comparative sequence data; partially overlaps the verified gene MRPL51/YPR100W [Source:SGD;Acc:S000006303]
snR191	19.24	-0.722392	0.202572	-3.79395	0.000148267	0.000641813	snR191	H/ACA box small nucleolar RNA (snoRNA); guides pseudouridylation of large subunit (LSU) rRNA at positions U2258 and U2260; encoded within the intron of NOG2/YNR053C [Source:SGD;Acc:S000029463]
YDR179W-A	277.056	0.169069	0.202555	0.796572	0.425699	0.554456	NVJ3	Protein with a potential role in tethering ER and vacuoles; localizes to nucleus-vacuole junctions in an Mdm1p-dependent manner; contains a lipid-binding PXA domain [Source:SGD;Acc:S000002587]
YMR086C-A	17.4948	-0.152284	0.202545	-0.817621	0.413574	0.541919	YMR086C-A	Dubious open reading frame; unlikely to encode a functional protein, based on available experimental and comparative sequence data [Source:SGD;Acc:S000004691]
YAL063C-A	23.9181	0.24527	0.202505	1.15043	0.249967	0.368869	YAL063C-A	Putative protein of unknown function; identified by expression profiling and mass spectrometry [Source:SGD;Acc:S000028813]
YKL053W	17.5443	-0.139066	0.202484	-0.739981	0.459312	0.588061	YKL053W	Dubious open reading frame; unlikely to encode a functional protein, based on available experimental and comparative sequence data; partially overlaps verified ORF ASK1 [Source:SGD;Acc:S000001536]
YPR151C	26.5087	1.50932	0.202442	6.20653	5.41679e-10	6.67187e-09	SUE1	Protein required for degradation of unstable forms of cytochrome c; located in the mitochondria [Source:SGD;Acc:S000006355]
YDR281C	20.6118	-0.431971	0.202433	-2.08361	0.0371957	0.0778598	PHM6	Protein of unknown function; expression is regulated by phosphate levels [Source:SGD;Acc:S000002689]
YBL040C	1508.09	0.117414	0.202428	0.561388	0.574533	0.690845	ERD2	HDEL receptor; an integral membrane protein that binds to the HDEL motif in proteins destined for retention in the endoplasmic reticulum; has a role in maintenance of normal levels of ER-resident proteins [Source:SGD;Acc:S000000136]
YBR117C	67.6233	1.34836	0.202427	5.84126	5.18083e-09	5.3987e-08	TKL2	Transketolase; catalyzes conversion of xylulose-5-phosphate and ribose-5-phosphate to sedoheptulose-7-phosphate and glyceraldehyde-3-phosphate in the pentose phosphate pathway; needed for synthesis of aromatic amino acids; TKL2 has a paralog, TKL1, that arose from the whole genome duplication [Source:SGD;Acc:S000000321]
tE(UUC)G1	26.6276	0.765079	0.202425	3.59545	0.000323829	0.00128754	SOE1	Glutamate tRNA (tRNA-Glu), predicted by tRNAscan-SE analysis; thiolation of uridine at wobble position (34) requires Ncs6p; can mutate to become a missense suppressor tRNA that inserts glutamate residues at lysine codons; target of K. lactis zymocin [Source:SGD;Acc:S000006553]
snR62	11.9809	0.846172	0.202395	3.54638	0.000390569	0.0015165	snR62	C/D box small nucleolar RNA (snoRNA); guides 2'-O-methylation of large subunit (LSU) rRNA at position U1888 [Source:SGD;Acc:S000006453]
YIL072W	37.5745	-0.0935568	0.202387	-0.459258	0.646049	0.751475	HOP1	Meiosis-specific protein required for chromosome synapsis; displays Red1p dependent localization to the unsynapsed axial-lateral elements of the synaptonemal complex; required for chiasma formation; in vitro, displays the ability to promote intra- and intermolecular synapsis between double-stranded DNA molecules and to fold DNA into rigid protein-DNA filaments [Source:SGD;Acc:S000001334]
YDR343C	28.4685	-0.164124	0.20236	-0.820937	0.411682	0.540156	HXT6	High-affinity glucose transporter; member of the major facilitator superfamily, nearly identical to Hxt7p, expressed at high basal levels relative to other HXTs, repression of expression by high glucose requires SNF3; HXT6 has a paralog, HXT1, that arose from the whole genome duplication [Source:SGD;Acc:S000002751]
snR80	41.4213	-0.239451	0.202355	-1.37532	0.169031	0.27251	snR80	H/ACA box small nucleolar RNA (snoRNA); guides pseudouridylation of large subunit (LSU) rRNA at position U776 and small subunit (SSU) rRNA at position U759 [Source:SGD;Acc:S000081374]
YPL201C	29.1791	-0.271976	0.202339	-1.44215	0.149261	0.247159	YIG1	Protein that interacts with glycerol 3-phosphatase; plays a role in anaerobic glycerol production; localizes to the nucleus and cytosol [Source:SGD;Acc:S000006122]
YCL026C-A	23.8297	0.161264	0.202339	0.908046	0.363854	0.494088	FRM2	Type II nitroreductase, using NADH as reductant; mutants are defective in fatty acid mediated repression of genes involved in fatty acid biosynthesis indicative of a role in lipid signaling; involved in the oxidative stress response; transcription induction by cadmium and selenite indicates a possible role in the metal stress response; expression induced in cells treated with the mycotoxin patuli…
YNR064C	27.6524	-0.0260245	0.202298	-0.295119	0.767903	0.848067	YNR064C	Epoxide hydrolase; member of the alpha/beta hydrolase fold family; may have a role in detoxification of epoxides [Source:SGD;Acc:S000005347]
YHR096C	38.3861	0.875231	0.202289	3.87748	0.000105543	0.000478247	HXT5	Hexose transporter with moderate affinity for glucose; induced in the presence of non-fermentable carbon sources, induced by a decrease in growth rate, contains an extended N-terminal domain relative to other HXTs; HXT5 has a paralog, HXT3, that arose from the whole genome duplication [Source:SGD;Acc:S000001138]
YBR072W	111.099	1.51842	0.202283	6.54344	6.01203e-11	8.7592e-10	HSP26	Small heat shock protein (sHSP) with chaperone activity; forms hollow, sphere-shaped oligomers that suppress unfolded proteins aggregation; long-lived protein that is preferentially retained in mother cells and forms cytoplasmic foci; oligomer activation requires heat-induced conformational change; also has mRNA binding activity [Source:SGD;Acc:S000000276]
YMR050C	54.1034	0.0356387	0.202185	0.167775	0.86676	0.914873	YMR050C	Retrotransposon TYA Gag and TYB Pol genes; transcribed/translated as one unit; polyprotein is processed to make a nucleocapsid-like protein (Gag), reverse transcriptase (RT), protease (PR), and integrase (IN); similar to retroviral genes [Source:SGD;Acc:S000004653]
YIL113W	23.8966	-0.582948	0.20218	-2.7518	0.00592689	0.0162899	SDP1	Stress-inducible dual-specificity MAP kinase phosphatase; negatively regulates Slt2p MAP kinase by direct dephosphorylation, diffuse localization under normal conditions shifts to punctate localization after heat shock; SDP1 has a paralog, MSG5, that arose from the whole genome duplication [Source:SGD;Acc:S000001375]
YAL005C	6864.59	0.19704	0.202166	0.927099	0.353875	0.483773	SSA1	ATPase involved in protein folding and NLS-directed nuclear transport; member of HSP70 family; required for ubiquitin-dependent degradation of short-lived proteins; forms chaperone complex with Ydj1p; localized to nucleus, cytoplasm, cell wall; 98% identical to paralog Ssa2p with different functional specificity in propagation of yeast [URE3] prions, vacuolar-mediated degradations of gluconeogene…
RPR1	31.059	-0.599441	0.202157	-3.14608	0.00165476	0.00547584	RPR1	RNA component of nuclear RNase P; nuclear RNase P cleaves tRNA precursors to generate mature 5' ends and facilitates turnover of nuclear RNAs; may be responsible for recognition of substrate tRNAs [Source:SGD;Acc:S000006490]
YGR121W-A	27.0876	0.0378136	0.202136	0.197741	0.843248	0.899255	YGR121W-A	Putative protein of unknown function [Source:SGD;Acc:S000028550]
YCR022C	14.9986	-0.364214	0.202105	-1.81457	0.0695902	0.131928	YCR022C	Putative protein of unknown function; conserved among S. cerevisiae strains; YCR022C is not an essential gene [Source:SGD;Acc:S000000616]
YBR050C	19.8661	0.0515999	0.202098	0.323463	0.746345	0.833185	REG2	Regulatory subunit of the Glc7p type-1 protein phosphatase; involved with Reg1p, Glc7p, and Snf1p in regulation of glucose-repressible genes, also involved in glucose-induced proteolysis of maltose permease; REG2 has a paralog, REG1, that arose from the whole genome duplication [Source:SGD;Acc:S000000254]
YLR341W	16.8653	0.325872	0.202075	1.40534	0.159919	0.261504	SPO77	Meiosis-specific protein of unknown function; required for spore wall formation during sporulation and for timely prospore membrane closure along with SPS1; required with Sps1p for phosphorylation and turnover of Ssp1p; dispensable for both nuclear divisions during meiosis [Source:SGD;Acc:S000004333]
YLR456W	81.457	0.482639	0.202067	2.22184	0.0262941	0.0580888	YLR456W	Protein of unknown function; predicted to encode a pyridoxal 5'-phosphate synthase based on sequence similarity but purified protein does not possess this activity, nor does it bind flavin mononucleotide (FMN); null mutant displays increased resistance to antifungal agents gliotoxin, cycloheximide and H2O2; YLR456W has a paralog, YPR172W, that arose from the whole genome duplication [Source:SGD;A…
YJR153W	33.0003	-1.21817	0.202056	-6.27348	3.53073e-10	4.52595e-09	PGU1	Endo-polygalacturonase; pectolytic enzyme that hydrolyzes the alpha-1,4-glycosidic bonds in the rhamnogalacturonan chains in pectins [Source:SGD;Acc:S000003914]
YLR123C	15.4962	0.542292	0.202053	2.72691	0.00639298	0.0173587	YLR123C	Dubious open reading frame; unlikely to encode a functional protein, based on available experimental and comparative sequence data; partially overlaps the dubious ORF YLR122C; contains characteristic aminoacyl-tRNA motif [Source:SGD;Acc:S000004113]
YOL150C	26.8492	-0.0700498	0.202051	-0.294908	0.768064	0.848067	YOL150C	Dubious open reading frame; unlikely to encode a functional protein, based on available experimental and comparative sequence data [Source:SGD;Acc:S000005510]
YAL068C	26.8581	0.256826	0.202043	1.27907	0.200872	0.312246	PAU8	Protein of unknown function; member of the seripauperin multigene family encoded mainly in subtelomeric regions [Source:SGD;Acc:S000002142]
YNL033W	15.3908	-0.171667	0.202027	-0.952055	0.341069	0.471075	YNL033W	Putative protein of unknown function; YNL033W has a paralog, YNL019C, that arose from a segmental duplication [Source:SGD;Acc:S000004978]
YCL002C	824.02	0.141928	0.202008	0.664894	0.506118	0.631419	YCL002C	Putative protein of unknown function; YCL002C is not an essential gene [Source:SGD;Acc:S000000508]
YBR019C	20.7535	0.284115	0.202003	1.37696	0.168525	0.272043	GAL10	UDP-glucose-4-epimerase; catalyzes interconversion of UDP-galactose and UDP-D-glucose in galactose metabolism; also catalyzes conversion of alpha-D-glucose or alpha-D-galactose to their beta-anomers; human homolog GALE implicated in galactosemia, can complement yeast null mutant [Source:SGD;Acc:S000000223]
YGR064W	25.5868	0.261885	0.201952	1.32924	0.183769	0.29054	YGR064W	Dubious open reading frame; unlikely to encode a functional protein, based on available experimental and comparative sequence data; partially overlaps the verified ORF SPT4/YGR063C [Source:SGD;Acc:S000003296]
YDR402C	19.3476	0.0913288	0.201936	0.455185	0.648976	0.753487	DIT2	N-formyltyrosine oxidase; sporulation-specific microsomal enzyme involved in the production of N,N-bisformyl dityrosine required for spore wall maturation, homologous to cytochrome P-450s; SWAT-GFP and mCherry fusion proteins localize to the endoplasmic reticulum and vacuole respectively [Source:SGD;Acc:S000002810]
YEL009C-A	15.0433	-0.00517875	0.201923	-0.116934	0.906912	0.940845	YEL009C-A	Putative protein of unknown function; conserved among S. cerevisiae strains; overlaps ORF YEL010W [Source:SGD;Acc:S000028741]
YBR089C-A	34.6015	0.435234	0.201895	2.09232	0.0364096	0.0765659	NHP6B	High-mobility group (HMG) protein; binds to and remodels nucleosomes; involved in recruiting FACT and other chromatin remodelling complexes to the chromosomes; functionally redundant with Nhp6Ap; required for transcriptional initiation fidelity of some tRNA genes; homologous to mammalian HMGB1 and HMGB2; NHP6B has a paralog, NHP6A, that arose from the whole genome duplication [Source:SGD;Acc:S000…
YGR122C-A	34.8003	0.328758	0.201846	1.4959	0.134679	0.226589	YGR122C-A	Dubious open reading frame; unlikely to encode a functional protein, based on available experimental and comparative sequence data; similar to YLR334C and YOL106W [Source:SGD;Acc:S000007240]
YMR244W	15.2926	-0.0108028	0.201812	-0.0773178	0.938371	0.960342	YMR244W	Putative protein of unknown function; SWAT-GFP fusion protein localizes to the endoplasmic reticulum and vacuole, while mCherry fusion localizes to just the vacuole [Source:SGD;Acc:S000004858]
YPR052C	22.6988	0.152193	0.201759	0.781776	0.434346	0.563085	NHP6A	High-mobility group (HMG) protein; binds to and remodels nucleosomes; involved in recruiting FACT and other chromatin remodelling complexes to chromosomes; functionally redundant with Nhp6Bp; required for transcriptional initiation fidelity of some tRNA genes; homologous to mammalian HMGB1 and HMGB2; NHP6A has a paralog, NHP6B, that arose from the whole genome duplication; protein abundance incre…
YKR015C	26.0626	0.673602	0.201757	3.15562	0.00160158	0.00532507	YKR015C	Putative protein of unknown function [Source:SGD;Acc:S000001723]
YFR023W	13.912	0.124357	0.201752	0.528186	0.59737	0.710612	PES4	Poly(A) binding protein, suppressor of DNA polymerase epsilon mutation; PES4 has a paralog, MIP6, that arose from the whole genome duplication [Source:SGD;Acc:S000001919]
YJR018W	23.7398	0.370836	0.201727	1.77491	0.0759128	0.141695	YJR018W	Dubious open reading frame; unlikely to encode a functional protein, based on available experimental and comparative sequence data [Source:SGD;Acc:S000003779]
YHR219W	48.1071	-0.0822607	0.201715	-0.439365	0.660397	0.763625	YHR219W	Putative protein of unknown function with similarity to helicases; located in the telomere region on the right arm of chromosome VIII [Source:SGD;Acc:S000001262]
YPR201W	29.3075	-0.0956766	0.20163	-0.48987	0.624226	0.73218	ARR3	Plasma membrane metalloid/H+ antiporter; member of bile/arsenite/riboflavin transporter (BART) superfamily; transports arsenite and antimonite; required for resistance to arsenic compounds; transcription is activated by Arr1p in the presence of arsenite [Source:SGD;Acc:S000006405]
YIL169C	46.8045	1.8788	0.201625	8.18497	2.72368e-16	8.44476e-15	YIL169C	Protein of unknown function, secreted when constitutively expressed; SWAT-GFP, seamless-GFP and mCherry fusion proteins localize to the cell periphery, SWAT-GFP fusion also localizes to the extracellular region, and mCherry fusion also localizes to the vacuole; S/T rich and highly similar to YOL155C, a putative glucan alpha-1,4-glucosidase; transcript is induced in both high and low pH environmen…
YDR320W-B	28.1001	-0.350955	0.201615	-1.74105	0.0816748	0.150003	YDR320W-B	Dubious open reading frame; unlikely to encode a functional protein, based on available experimental and comparative sequence data; overlaps the verified gene DAD4/YDR320C-A [Source:SGD;Acc:S000028821]
snR128	27.4983	-0.238901	0.201586	-1.25518	0.209414	0.322499	snR128	C/D box small nucleolar RNA (snoRNA); referred to as U14; essential gene required for cleavage of 35S primary rRNA transcript to release the precursor to the 18S rRNA; guides 2'-O-methylation of small subunit (SSU) rRNA at position C414 [Source:SGD;Acc:S000006508]
YHL024W	31.0891	0.487009	0.201571	2.47444	0.0133447	0.032758	RIM4	Putative RNA-binding protein; required for the expression of early and middle sporulation genes [Source:SGD;Acc:S000001016]
YEL008C-A	37.1287	0.211054	0.201554	1.08493	0.277952	0.399687	YEL008C-A	Protein of unknown function; identified by gene-trapping, microarray-based expression analysis, and genome-wide homology searching [Source:SGD;Acc:S000028618]
YER179W	28.973	0.219415	0.201509	1.01013	0.312432	0.440217	DMC1	Meiosis-specific recombinase required for double-strand break repair; also required for pairing between homologous chromosomes; required for the normal morphogenesis of synaptonemal complex; homolog of Rad51p and the bacterial RecA protein; binds ssDNA and dsDNA, forms helical filaments; stimulated by Rdh54p [Source:SGD;Acc:S000000981]
YKL107W	14.2518	-0.144314	0.201459	-0.736987	0.46113	0.58943	YKL107W	Putative short-chain dehydrogenase/reductase; proposed to be a palmitoylated membrane protein [Source:SGD;Acc:S000001590]
YJL160C	15.4498	0.0232876	0.20144	0.13168	0.895237	0.932113	PIR5	Putative protein of unknown function; member of the PIR (Proteins with Internal Repeats) family of cell wall proteins; SWAT-GFP fusion protein localizes to the endoplasmic reticulum and vacuole, and mCherry fusion localizes to the vacuole; non-essential gene that is required for sporulation; mRNA is weakly cell cycle regulated, peaking in mitosis; YJL160C has a paralog, PIR1, that arose from the …
YFL014W	996.753	3.13663	0.201432	12.3189	7.16865e-35	1.44294e-32	HSP12	Plasma membrane protein involved in maintaining membrane organization; involved in maintaining organization during stress conditions; induced by heat shock, oxidative stress, osmostress, stationary phase, glucose depletion, oleate and alcohol; protein abundance increased in response to DNA replication stress and dietary restriction; regulated by the HOG and Ras-Pka pathways; required for dietary …
YPR015C	25.0991	-0.144239	0.201427	-0.71337	0.475617	0.601715	YPR015C	Putative zinc finger transcription factor; binds DNA in sequence-specific manner; overexpression causes a cell cycle delay or arrest [Source:SGD;Acc:S000006219]
YKL071W	44.5184	-0.285909	0.201414	-1.56357	0.117918	0.203743	YKL071W	Putative protein of unknown function; expression induced in cells treated with the mycotoxin patulin, and also the quinone methide triterpene celastrol; green fluorescent protein (GFP)-fusion protein localizes to the cytoplasm [Source:SGD;Acc:S000001554]
YGR292W	32.3488	0.362655	0.201413	1.76033	0.0783518	0.145257	MAL12	Maltase (alpha-D-glucosidase); inducible protein involved in maltose catabolism; encoded in the MAL1 complex locus; hydrolyzes the disaccharides maltose, turanose, maltotriose, and sucrose [Source:SGD;Acc:S000003524]
YNL284C-B	81.2056	-0.1696	0.201335	-0.859258	0.390198	0.52054	YNL284C-B	Retrotransposon TYA Gag and TYB Pol genes; transcribed/translated as one unit; polyprotein is processed to make a nucleocapsid-like protein (Gag), reverse transcriptase (RT), protease (PR), and integrase (IN); similar to retroviral genes [Source:SGD;Acc:S000007387]
YOL165C	22.7991	-0.426568	0.201299	-2.54835	0.0108232	0.027324	AAD15	Putative aryl-alcohol dehydrogenase; similar to P. chrysosporium aryl-alcohol dehydrogenase; mutational analysis has not yet revealed a physiological role; AAD15 has a paralog, AAD3, that arose from a segmental duplication; members of the AAD gene family comprise three pairs (AAD3 + AAD15, AAD6/AAD16 + AAD4, AAD10 + AAD14) whose two genes are more related to one another than to other members of t…
YCR025C	14.7718	-0.192395	0.201235	-0.950589	0.341813	0.471585	YCR025C	Putative protein of unknown function; conserved across S. cerevisiae strains; YCR025C is not an essential gene [Source:SGD;Acc:S000000620]
YOL052C-A	81.0451	2.27947	0.201223	9.80756	1.04464e-22	6.08793e-21	DDR2	Multi-stress response protein; expression is activated by a variety of xenobiotic agents and environmental or physiological stresses; DDR2 has a paralog, HOR7, that arose from the whole genome duplication [Source:SGD;Acc:S000005413]
YFL062W	30.6388	0.605933	0.2012	2.77327	0.00554962	0.0154077	COS4	Endosomal protein involved in turnover of plasma membrane proteins; member of the DUP380 subfamily of conserved, often subtelomeric COS genes; required for the multivesicular vesicle body sorting pathway that internalizes plasma membrane proteins for degradation; Cos proteins provide ubiquitin in trans for nonubiquitinated cargo proteins [Source:SGD;Acc:S000001832]
YPR193C	36.7272	0.310954	0.201181	1.50949	0.131173	0.221876	HPA2	Tetrameric histone acetyltransferase; has similarity to Gcn5p, Hat1p, Elp3p, and Hpa3p; acetylates histones H3 and H4 in vitro and exhibits autoacetylation activity; also acetylates polyamines [Source:SGD;Acc:S000006397]
snR9	43.2211	-0.393779	0.201126	-1.95175	0.0509676	0.10187	snR9	H/ACA box small nucleolar RNA (snoRNA); guides pseudouridylation of large subunit (LSU) rRNA at position U2340 and U2345 [Source:SGD;Acc:S000007292]
YLR146W-A	46.1158	0.341525	0.201124	1.50035	0.133524	0.225007	YLR146W-A	Putative protein of unknown function [Source:SGD;Acc:S000113566]
YMR017W	14.5164	0.452056	0.201111	2.16873	0.0301029	0.0654692	SPO20	Meiosis-specific subunit of the t-SNARE complex; required for prospore membrane formation during sporulation; similar to but not functionally redundant with Sec9p; binds to phosphatidic acid; SNAP-25 homolog [Source:SGD;Acc:S000004619]
YPL054W	30.311	0.492684	0.201088	2.37315	0.0176371	0.0414828	LEE1	Zinc-finger protein of unknown function [Source:SGD;Acc:S000005975]
YOR384W	54.8411	-1.02581	0.201072	-5.82474	5.72032e-09	5.90225e-08	FRE5	Putative ferric reductase with similarity to Fre2p; expression induced by low iron levels; the authentic, non-tagged protein is detected in highly purified mitochondria in high-throughput studies [Source:SGD;Acc:S000005911]
YFL041W-A	27.1442	0.233787	0.201051	1.22658	0.21998	0.335163	YFL041W-A	Putative protein of unknown function; identified by fungal homology and RT-PCR [Source:SGD;Acc:S000028547]
YOL047C	11.5503	-0.0791867	0.200995	-0.473264	0.636025	0.742009	LDS2	Protein Involved in spore wall assembly; localizes to lipid droplets found on or outside of the prospore membrane; shares similarity with Lds1p and Rrt8p, and a strain mutant for all 3 genes exhibits reduced dityrosine fluorescence relative to the single mutants; green fluorescent protein (GFP)-fusion protein localizes to the cytoplasm in a punctate pattern [Source:SGD;Acc:S000005407]
YMR182W-A	22.3705	0.464168	0.200906	2.19299	0.0283078	0.0619719	YMR182W-A	Putative protein of unknown function [Source:SGD;Acc:S000028693]
YOR343C	26.6003	-0.0641258	0.200862	-0.504281	0.614064	0.723945	YOR343C	Putative protein of unknown function; conserved across S. cerevisiae strains [Source:SGD;Acc:S000005870]
YLR267W	31.1851	-0.220649	0.200832	-1.08561	0.277653	0.399531	BOP2	Protein of unknown function [Source:SGD;Acc:S000004257]
YCL068C	51.293	0.143336	0.200775	0.717553	0.473033	0.59941	YCL068C	Putative protein of unknown function [Source:SGD;Acc:S000000573]
YDR467C	20.2323	0.357257	0.200721	1.65817	0.0972832	0.173702	YDR467C	Dubious open reading frame; unlikely to encode a functional protein, based on available experimental and comparative sequence data [Source:SGD;Acc:S000002875]
YBR128C	36.2718	-0.0670846	0.200703	-0.363195	0.716459	0.81075	ATG14	Autophagy-specific subunit of phosphatidylinositol 3-kinase complex I; Atg14p targets complex I to the phagophore assembly site (PAS); required for localizing additional ATG proteins to the PAS; required for overflow degradation of misfolded proteins when ERAD is saturated; homolog of human Barkor; other members are Vps34, Vps15, and Vps30p [Source:SGD;Acc:S000000332]
YMR174C	56.144	1.43462	0.200693	6.59171	4.34799e-11	6.51577e-10	PAI3	Cytoplasmic proteinase A (Pep4p) inhibitor; dependent on Pbs2p and Hog1p protein kinases for osmotic induction; intrinsically unstructured, N-terminal half becomes ordered in the active site of proteinase A upon contact [Source:SGD;Acc:S000004786]
YNL202W	23.4391	0.172134	0.200688	0.838745	0.401613	0.530911	SPS19	Peroxisomal 2,4-dienoyl-CoA reductase; auxiliary enzyme of fatty acid beta-oxidation; homodimeric enzyme required for growth and sporulation on petroselineate medium; expression induced during late sporulation and in the presence of oleate [Source:SGD;Acc:S000005146]
YJL116C	441.873	1.51377	0.200599	7.18072	6.93437e-13	1.33064e-11	NCA3	Protein involved in mitochondrion organization; functions with Nca2p to regulate mitochondrial expression of subunits 6 (Atp6p) and 8 (Atp8p) of the Fo-F1 ATP synthase; SWAT-GFP, seamless-GFP and mCherry fusion proteins localize to the vacuole; member of the SUN family; expression induced in cells treated with the mycotoxin patulin; NCA3 has a paralog, UTH1, that arose from the whole genome dupli…
snR32	11.9546	0.151038	0.20055	0.762245	0.445914	0.574293	snR32	H/ACA box small nucleolar RNA (snoRNA); guides pseudouridylation of large subunit (LSU) rRNA at position U2191 [Source:SGD;Acc:S000007297]
YIR044C	39.2298	0.0749057	0.200542	0.340076	0.7338	0.822828	NA	NA
YDL169C	24.6878	0.489567	0.200522	2.37155	0.0177136	0.0416315	UGX2	Protein of unknown function; transcript accumulates in response to any combination of stress conditions [Source:SGD;Acc:S000002328]
YDL152W	53.3813	-0.12926	0.200514	-0.591491	0.554191	0.673504	YDL152W	Dubious open reading frame; unlikely to encode a functional protein, based on available experimental and comparative sequence data; partially overlaps the verified ORF SAS10/YDL153C, a component of the small ribosomal subunit processosome [Source:SGD;Acc:S000002311]
YPR146C	33.0086	0.148278	0.200493	0.713789	0.475358	0.601508	YPR146C	Dubious open reading frame; unlikely to encode a functional protein, based on available experimental and comparative sequence data [Source:SGD;Acc:S000006350]
YGL258W	16.5595	-0.185868	0.200489	-0.941586	0.346405	0.476042	VEL1	Protein of unknown function; highly induced in zinc-depleted conditions and has increased expression in NAP1 deletion mutants; VEL1 has a paralog, YOR387C, that arose from a single-locus duplication [Source:SGD;Acc:S000003227]
YHR071C-A	15.3938	0.316938	0.200464	1.52391	0.12753	0.217409	YHR071C-A	Dubious open reading frame; unlikely to encode a functional protein, based on available experimental and comparative sequence data; partially overlaps the verified ORF ERG7/YHR072W [Source:SGD;Acc:S000028781]
YOR364W	25.1556	0.0467057	0.200462	0.214388	0.830245	0.892038	YOR364W	Dubious open reading frame; unlikely to encode a functional protein, based on available experimental and comparative sequence data; partially overlaps the uncharacterized ORF YOR365C [Source:SGD;Acc:S000005891]
snR35	12.7887	0.135873	0.200446	0.948459	0.342896	0.472354	snR35	H/ACA box small nucleolar RNA (snoRNA); predicted to guide pseudouridylation of small subunit (SSU) rRNA at position 1191 [Source:SGD;Acc:S000007299]
YLR157C-B	10.9381	-0.142793	0.200444	-0.754761	0.450393	0.579234	YLR157C-B	Retrotransposon TYA Gag and TYB Pol genes; transcribed/translated as one unit; polyprotein is processed to make a nucleocapsid-like protein (Gag), reverse transcriptase (RT), protease (PR), and integrase (IN); similar to retroviral genes [Source:SGD;Acc:S000007374]
YNL036W	908.198	0.984378	0.200421	4.70238	2.57142e-06	1.70543e-05	NCE103	Carbonic anhydrase; metalloenzyme that catalyzes CO2 hydration to bicarbonate, which is an important metabolic substrate, and protons; not expressed under conditions of high CO2, such as inside a growing colony, but transcription is induced in response to low CO2 levels, such as on the colony surface in ambient air; poorly transcribed under aerobic conditions and at an undetectable level under an…
YJL105W	13.6171	-0.241634	0.200356	-1.29128	0.196606	0.307286	SET4	Protein of unknown function, contains a SET domain; SET4 has a paralog, SET3, that arose from the whole genome duplication [Source:SGD;Acc:S000003641]
YIR017C	25.6003	-0.0726017	0.200274	-0.354637	0.722862	0.815357	MET28	bZIP transcriptional activator in the Cbf1p-Met4p-Met28p complex; participates in the regulation of sulfur metabolism [Source:SGD;Acc:S000001456]
YMR158C-A	23.1211	0.384041	0.200271	1.81209	0.0699728	0.132533	YMR158C-A	Putative protein of unknown function; may contain a lipid attachment site; YMR158C-A is not an essential gene [Source:SGD;Acc:S000007249]
YCR018C-A	31.6115	0.322541	0.200233	1.42744	0.153453	0.252638	YCR018C-A	Putative protein of unknown function; encoded opposite a Ty1 LTR [Source:SGD;Acc:S000007230]
YOR319W	319.844	0.298263	0.200223	1.41789	0.156223	0.256326	HSH49	U2-snRNP associated splicing factor; similar to the mammalian splicing factor SAP49; proposed to function as a U2-snRNP assembly factor along with Hsh155p and binding partner Cus1p; contains two RNA recognition motifs (RRM) [Source:SGD;Acc:S000005846]
YOR182C	2134.81	0.382581	0.200215	1.84606	0.0648836	0.124429	RPS30B	Protein component of the small (40S) ribosomal subunit; homologous to mammalian ribosomal protein S30, no bacterial homolog; RPS30B has a paralog, RPS30A, that arose from the whole genome duplication; protein abundance increases in response to DNA replication stress [Source:SGD;Acc:S000005708]
YBL049W	30.5819	0.756996	0.20017	3.44981	0.000560975	0.00211044	MOH1	Protein of unknown function, essential for stationary phase survival; not required for growth on nonfermentable carbon sources; possibly linked with vacuolar transport [Source:SGD;Acc:S000000145]
YNL093W	29.9583	0.210376	0.200165	0.865838	0.386579	0.517137	YPT53	Stress-induced Rab family GTPase; required for vacuolar protein sorting and endocytosis; involved in ionic stress tolerance; similar to Vps21p and Ypt52p; functional homolog of Vps21p; mammalian Rab5 homolog; YPT53 has a paralog, VPS21, that arose from the whole genome duplication [Source:SGD;Acc:S000005037]
YDL222C	66.3048	0.684919	0.200101	3.15118	0.00162612	0.00539182	FMP45	Integral membrane protein localized to mitochondria; required for sporulation and maintaining sphingolipid content; similar to SUR7; FMP45 has a paralog, YNL194C, that arose from the whole genome duplication [Source:SGD;Acc:S000002381]
YAR009C	522.307	0.023903	0.200067	0.0928363	0.926034	0.952503	YAR009C	Retrotransposon TYA Gag and TYB Pol genes; Gag processing produces capsid proteins, Pol is cleaved to produce protease, reverse transcriptase and integrase activities; in YARCTy1-1 TYB is mutant and probably non-functional; protein product forms cytoplasmic foci upon DNA replication stress [Source:SGD;Acc:S000000067]
YLR312C	24.7711	0.707105	0.200064	3.31473	0.000917323	0.00325092	YLR312C	Autophagy receptor with a role in degradation of the ER and nucleus; involved specifically in autophagy of perinuclear endoplasmic reticulum in response to nitrogen starvation or rapamycin treatment; localizes to the perinuclear ER [Source:SGD;Acc:S000004303]
YDR070C	41.9764	0.703955	0.200046	3.50175	0.000462216	0.00177281	FMP16	Protein of unknown function; may be involved in responding to conditions of stress; the authentic, non-tagged protein is detected in highly purified mitochondria in high-throughput studies; protein abundance increases in response to DNA replication stress [Source:SGD;Acc:S000002477]
YOR177C	40.6593	0.668092	0.200005	3.25562	0.00113144	0.00391495	MPC54	Component of the meiotic outer plaque; a membrane-organizing center which is assembled on the cytoplasmic face of the spindle pole body during meiosis II and triggers the formation of the prospore membrane; potential Cdc28p substrate [Source:SGD;Acc:S000005703]
YBR141W-A	32.9638	0.425492	0.200002	2.04915	0.0404472	0.0837967	YBR141W-A	Dubious open reading frame; unlikely to encode a functional protein, based on available experimental and comparative sequence data; overlaps the uncharacterized ORF YBR141C; identified by gene-trapping, microarray analysis, and genome-wide homology searching [Source:SGD;Acc:S000028602]
YGL121C	48.1996	1.47318	0.199975	6.62792	3.40448e-11	5.20093e-10	GPG1	Proposed gamma subunit of the heterotrimeric G protein; interacts with the receptor Gpr1p; involved in regulation of pseudohyphal growth; requires Gpb1p or Gpb2p to interact with Gpa2p; overproduction causes prion curing [Source:SGD;Acc:S000003089]
snR50	13.04	0.183597	0.199939	0.852096	0.394161	0.524381	snR50	C/D box small nucleolar RNA (snoRNA); guides 2'-O-methylation of large subunit (LSU) rRNA at position G867 [Source:SGD;Acc:S000006441]
YMR095C	26.3654	1.39558	0.199928	6.03831	1.5574e-09	1.78223e-08	SNO1	Protein of unconfirmed function; involved in pyridoxine metabolism; expression is induced during stationary phase; forms a putative glutamine amidotransferase complex with Snz1p, with Sno1p serving as the glutaminase [Source:SGD;Acc:S000004701]
YIL099W	32.0569	0.0112055	0.199923	0.0751765	0.940074	0.961304	SGA1	Intracellular sporulation-specific glucoamylase; involved in glycogen degradation; induced during starvation of a/a diploids late in sporulation, but dispensable for sporulation [Source:SGD;Acc:S000001361]
YGR109C	65.1598	-0.914046	0.19989	-4.90028	9.57007e-07	6.87603e-06	CLB6	B-type cyclin involved in DNA replication during S phase; activates Cdc28p to promote initiation of DNA synthesis; functions in formation of mitotic spindles along with Clb3p and Clb4p; most abundant during late G1; CLB6 has a paralog, CLB5, that arose from the whole genome duplication [Source:SGD;Acc:S000003341]
snR76	10.8768	-0.141213	0.199813	-0.699143	0.484463	0.610341	snR76	C/D box small nucleolar RNA (snoRNA); guides 2'-O-methylation of large subunit (LSU) rRNA at position C2197 [Source:SGD;Acc:S000007310]
YDR317W	60.3806	-0.319707	0.199737	-1.71549	0.0862552	0.156905	HIM1	Protein of unknown function involved in DNA repair [Source:SGD;Acc:S000002725]
YLR408C	52.8113	0.680074	0.199733	3.20398	0.00135541	0.00459365	BLS1	Subunit of the BLOC-1 complex involved in endosomal maturation; green fluorescent protein (GFP)-fusion protein localizes to the endosome; YLR408C is not an essential gene [Source:SGD;Acc:S000004400]
YOL114C	26.3638	0.2615	0.199708	1.34931	0.177239	0.28213	PTH4	Protein similar to the human peptidyl-tRNA hydrolase gene ICT1; associates with mitochondrial large subunit; may function in translation termination; YOL114C is not an essential gene [Source:SGD;Acc:S000005474]
YDR102C	12.3609	-0.133017	0.199661	-0.658707	0.510084	0.634856	YDR102C	Putative protein of unknown function; conserved among S. cerevisiae strains; YDR102C is not an essential gene; homozygous diploid deletion strain exhibits high budding index [Source:SGD;Acc:S000002509]
YGR067C	68.5407	-0.122406	0.199651	-0.724339	0.468857	0.5962	YGR067C	Putative protein of unknown function; contains a zinc finger motif similar to that of Adr1p [Source:SGD;Acc:S000003299]
snR54	41.8424	0.337695	0.199617	1.50901	0.131297	0.222027	snR54	C/D box small nucleolar RNA (snoRNA); guides 2'-O-methylation of small subunit (SSU) rRNA at position A974 [Source:SGD;Acc:S000006445]
YDL244W	46.1948	0.0325831	0.199565	0.166364	0.86787	0.915277	THI13	Protein involved in synthesis of the thiamine precursor HMP; member of a subtelomeric gene family including THI5, THI11, THI12, and THI13; hydroxymethylpyrimidine is also known as HMP [Source:SGD;Acc:S000002403]
YLR070C	42.0368	-0.408762	0.199552	-2.20056	0.0277672	0.0609794	XYL2	Xylitol dehydrogenase; converts xylitol to D-xylulose; expression induced by xylose, even though this pentose sugar is not well utilized by S. cerevisiae; null mutant has cell wall defect [Source:SGD;Acc:S000004060]
YER038W-A	26.0215	0.0889345	0.199468	0.495312	0.62038	0.729572	FMP49	Mitochondrial protein of unknown function; almost completely overlaps ORF HVG1/YER039C [Source:SGD;Acc:S000028746]
YMR306C-A	11.9972	-0.118137	0.199456	-0.566924	0.570766	0.687673	YMR306C-A	Dubious open reading frame; unlikely to encode a functional protein, based on available experimental and comparative sequence data; almost completely overlaps 3' end of ORF FKS3/YMR306W [Source:SGD;Acc:S000004922]
YDL133C-A	3579.13	0.41603	0.199424	2.04004	0.0413465	0.0853229	RPL41B	Ribosomal 60S subunit protein L41B; comprises only 25 amino acids; rpl41a rpl41b double null mutant is viable; homologous to mammalian ribosomal protein L41, no bacterial homolog; RPL41B has a paralog, RPL41A, that arose from the whole genome duplication [Source:SGD;Acc:S000002293]
YOR318C	31.3955	0.670642	0.199411	3.18668	0.00143916	0.00483873	YOR318C	Dubious open reading frame; unlikely to encode a functional protein, based on available experimental and comparative sequence data; transcript is predicted to be spliced but there is no evidence that it is spliced in vivo [Source:SGD;Acc:S000005845]
YDR504C	29.9626	0.259645	0.199337	1.32999	0.183521	0.290312	SPG3	Protein required for high temperature survival during stationary phase; not required for growth on nonfermentable carbon sources; SWAT-GFP and mCherry fusion proteins localize to the endoplasmic reticulum [Source:SGD;Acc:S000002912]
YDL024C	34.7706	0.130115	0.199291	0.637594	0.523738	0.646354	DIA3	Protein of unknown function; involved in invasive and pseudohyphal growth [Source:SGD;Acc:S000002182]
YDR258C	917.543	-0.0424389	0.19927	-0.17478	0.861252	0.911199	HSP78	Oligomeric mitochondrial matrix chaperone; cooperates with Ssc1p in mitochondrial thermotolerance after heat shock; able to prevent the aggregation of misfolded proteins as well as resolubilize protein aggregates [Source:SGD;Acc:S000002666]
YNL335W	15.0154	0.627515	0.199221	2.78383	0.00537214	0.0149877	DDI3	Cyanamide hydratase that detoxifies cyanamide; member of the HD domain metalloprotein superfamily; expression is induced over 100-fold by cyanamide and by SN2-type DNA alkylating agents such as MMS and DMA; induction decreased in rad6 and rad18 mutants; gene and protein are identical to DDI2 and Ddi2p [Source:SGD;Acc:S000005279]
YLR388W	2284.64	0.356192	0.199196	1.78427	0.0743799	0.139412	RPS29A	Protein component of the small (40S) ribosomal subunit; homologous to mammalian ribosomal protein S29 and bacterial S14; RPS29A has a paralog, RPS29B, that arose from the whole genome duplication [Source:SGD;Acc:S000004380]
YHR215W	124.885	-0.551346	0.199146	-2.55502	0.0106181	0.0269043	PHO12	One of three repressible acid phosphatases; glycoprotein that is transported to the cell surface by the secretory pathway; pregulated by phosphate starvation; PHO12 has a paralog, PHO11, that arose from a segmental duplication [Source:SGD;Acc:S000001258]
YKL044W	36.0092	-0.429283	0.199096	-2.32303	0.0201774	0.0463494	MMO1	Protein of unknown function; SWAT-GFP, seamless-GFP and mCherry fusion proteins localize to the mitochondria; mRNA identified as translated by ribosome profiling data; MMO1 is a non-essential gene [Source:SGD;Acc:S000001527]
snR70	12.3145	0.126039	0.199032	0.594849	0.551944	0.671033	snR70	C/D box small nucleolar RNA (snoRNA); predicted to guide 2'-O-methylation of small subunit (SSU) rRNA at position C1639 [Source:SGD;Acc:S000006461]
YOR316C-A	42.4902	0.231884	0.199	1.15169	0.249447	0.368463	YOR316C-A	Putative protein of unknown function; identified by fungal homology and RT-PCR [Source:SGD;Acc:S000028584]
YGL006W-A	34.015	0.161684	0.198995	0.757148	0.448961	0.577748	YGL006W-A	Putative protein of unknown function; identified by SAGE [Source:SGD;Acc:S000028769]
YML132W	30.6328	0.0966865	0.198975	0.51236	0.608399	0.718705	COS3	Endosomal protein involved in turnover of plasma membrane proteins; member of the DUP380 subfamily of conserved, often subtelomeric COS genes; required for the multivesicular vesicle body sorting pathway that internalizes plasma membrane proteins for degradation; Cos proteins provide ubiquitin in trans for nonubiquitinated cargo proteins [Source:SGD;Acc:S000004601]
YBR300C	14.8518	-0.721702	0.198974	-4.17183	3.02161e-05	0.000157826	YBR300C	Dubious open reading frame; unlikely to encode a functional protein, based on available experimental and comparative sequence data; partially overlaps the verified gene YBR301W; YBR300C is not an essential gene [Source:SGD;Acc:S000000504]
YMR317W	34.2258	0.0218168	0.19897	0.196201	0.844453	0.89993	YMR317W	Putative protein of unknown function; has some similarity to sialidase from Trypanosoma; YMR317W is not an essential gene [Source:SGD;Acc:S000004936]
YJR020W	12.3857	0.255059	0.198969	1.14982	0.250217	0.368994	YJR020W	Dubious open reading frame; unlikely to encode a functional protein, based on available experimental and comparative sequence data [Source:SGD;Acc:S000003781]
YJR047C	62.9004	-1.55055	0.198964	-8.14208	3.88541e-16	1.17008e-14	ANB1	Translation elongation factor eIF-5A; previously thought to function in translation initiation; undergoes an essential hypusination modification; expressed under anaerobic conditions; ANB1 has a paralog, HYP2, that arose from the whole genome duplication; human EIF5A complements the inviability of the yeast hyp2 anb1 double null mutant [Source:SGD;Acc:S000003808]
YDL242W	12.4457	0.411006	0.198938	2.03046	0.0423096	0.0869113	YDL242W	Putative protein of unknown function; conserved across S. cerevisiae strains [Source:SGD;Acc:S000002401]
YFR017C	36.5735	0.183926	0.198915	0.783615	0.433266	0.562148	IGD1	Cytoplasmic protein that inhibits Gdb1p glycogen debranching activity; required for normal intracellular accumulation of glycogen; phosphorylated in vivo; expression increases during wine fermentation; protein abundance increases in response to DNA replication stress; IGD1 has a paralog, YOL024W, that arose from the whole genome duplication [Source:SGD;Acc:S000001913]
YNR062C	36.8914	-1.07827	0.198893	-5.54678	2.90974e-08	2.66578e-07	YNR062C	Putative membrane protein of unknown function [Source:SGD;Acc:S000005345]
YMR315W-A	50.4198	0.163178	0.198888	0.769211	0.441768	0.570239	YMR315W-A	Putative protein of unknown function [Source:SGD;Acc:S000028697]
YOL101C	651.879	0.0485982	0.198827	0.292696	0.769754	0.848998	IZH4	Membrane protein involved in zinc ion homeostasis; member of the four-protein IZH family; expression induced by fatty acids and altered zinc levels; deletion reduces sensitivity to excess zinc; possible role in sterol metabolism; protein increases in abundance and relocalizes from nucleus to ER upon DNA replication stress; IZH4 has a paralog, IZH1, that arose from the whole genome duplication [So…
YHR216W	8670.45	-1.12877	0.198789	-6.08579	1.15915e-09	1.35357e-08	IMD2	Inosine monophosphate dehydrogenase; catalyzes the rate-limiting step in GTP biosynthesis, expression is induced by mycophenolic acid resulting in resistance to the drug, expression is repressed by nutrient limitation; IMD2 has a paralog, YAR073W/YAR075W, that arose from a segmental duplication [Source:SGD;Acc:S000001259]
YCR013C	10.6037	-0.0848689	0.198777	-0.372217	0.709731	0.805454	YCR013C	Dubious open reading frame; unlikely to encode a functional protein, based on available experimental and comparative sequence data; transcription of both YCR013C and the overlapping essential gene PGK1 is reduced in a gcr1 null mutant [Source:SGD;Acc:S000000606]
YGL226C-A	990.365	-0.0283911	0.198746	-0.145712	0.884149	0.925313	OST5	Zeta subunit of the oligosaccharyltransferase complex of the ER lumen; complex catalyzes asparagine-linked glycosylation of newly synthesized proteins [Source:SGD;Acc:S000003194]
YBR299W	36.8433	0.174289	0.198684	0.841628	0.399996	0.529793	MAL32	Maltase (alpha-D-glucosidase); inducible protein involved in maltose catabolism; encoded in the MAL3 complex locus; functional in genomic reference strain S288C; hydrolyzes the disaccharides maltose, turanose, maltotriose, and sucrose [Source:SGD;Acc:S000000503]
YGR087C	12.1262	0.196342	0.198665	0.898819	0.368749	0.499227	PDC6	Minor isoform of pyruvate decarboxylase; decarboxylates pyruvate to acetaldehyde, involved in amino acid catabolism; transcription is glucose- and ethanol-dependent, and is strongly induced during sulfur limitation [Source:SGD;Acc:S000003319]
YCR102W-A	11.3077	-0.215833	0.198653	-1.07426	0.282708	0.405137	YCR102W-A	Dubious open reading frame; unlikely to encode a functional protein, based on available experimental and comparative sequence data [Source:SGD;Acc:S000007231]
YAL064W-B	33.6297	0.462805	0.198617	2.45043	0.0142685	0.0346875	YAL064W-B	Fungal-specific protein of unknown function [Source:SGD;Acc:S000002141]
YPR020W	1002.66	0.413633	0.198455	2.01935	0.043451	0.0888501	ATP20	Subunit g of the mitochondrial F1F0 ATP synthase; reversibly phosphorylated on two residues; unphosphorylated form is required for dimerization of the ATP synthase complex, which in turn determines oligomerization of the complex and the shape of inner membrane cristae [Source:SGD;Acc:S000006224]
snR42	41.9588	0.51654	0.198425	2.42758	0.0152	0.0366324	snR42	H/ACA box small nucleolar RNA (snoRNA); guides pseudouridylation of large subunit (LSU) rRNA at position U2975 [Source:SGD;Acc:S000006502]
YMR292W	676.004	0.0347797	0.198405	0.169326	0.86554	0.914045	GOT1	Homodimeric protein that is packaged into COPII vesicles; cycles between the ER and Golgi; involved in secretory transport but not directly required for aspects of transport assayed in vitro; may influence membrane composition [Source:SGD;Acc:S000004906]
YOR192C-C	36.6733	-0.410844	0.198379	-2.08816	0.0367833	0.0773002	YOR192C-C	Putative protein of unknown function; identified by expression profiling and mass spectrometry [Source:SGD;Acc:S000028857]
YER014C-A	12.5783	-0.0919543	0.198361	-0.502341	0.615427	0.724967	BUD25	Protein involved in bud-site selection; diploid mutants display a random budding pattern instead of the wild-type bipolar pattern [Source:SGD;Acc:S000007590]
YDL079C	29.0786	-0.289883	0.198339	-1.48475	0.137609	0.230533	MRK1	Glycogen synthase kinase 3 (GSK-3) homolog; one of four GSK-3 homologs in S. cerevisiae that function to activate Msn2p-dependent transcription of stress responsive genes and that function in protein degradation; MRK1 has a paralog, RIM11, that arose from the whole genome duplication [Source:SGD;Acc:S000002237]
YOL162W	11.4027	0.179212	0.198314	0.870267	0.384155	0.514659	YOL162W	Putative protein of unknown function; member of the Dal5p subfamily of the major facilitator family [Source:SGD;Acc:S000005522]
YPR200C	29.7872	0.511377	0.198268	2.44311	0.0145612	0.0353037	ARR2	Arsenate reductase required for arsenate resistance; converts arsenate to arsenite which can then be exported from cells by Arr3p [Source:SGD;Acc:S000006404]
YBR147W	71.5751	-0.0182501	0.19817	-0.034992	0.972086	0.981233	RTC2	Putative vacuolar membrane transporter for cationic amino acids; likely contributes to amino acid homeostasis by exporting cationic amino acids from the vacuole; positive regulation by Lys14p suggests that lysine may be the primary substrate; member of the PQ-loop family, with seven transmembrane domains; similar to mammalian PQLC2 vacuolar transporter; RTC2 has a paralog, YPQ1, that arose from t…
YML058W-A	30.7096	0.826351	0.198158	3.96753	7.26208e-05	0.000343665	HUG1	Ribonucleotide reductase inhibitor; intrinsically disordered protein that binds to and inhibits Rnr2p; involved in the Mec1p-mediated checkpoint pathway; transcription is induced by genotoxic stress and by activation of the Rad53p pathway; protein abundance increases in response to DNA replication stress [Source:SGD;Acc:S000007472]
YHR214W-A	97.6815	-0.777897	0.198145	-4.14139	3.45201e-05	0.000177363	YHR214W-A	Dubious open reading frame; induced by zinc deficiency; YHR214W-A has a paralog, YAR068W, that arose from a segmental duplication [Source:SGD;Acc:S000003535]
YFR053C	498.458	0.485832	0.19813	1.88481	0.0594553	0.115747	HXK1	Hexokinase isoenzyme 1; a cytosolic protein that catalyzes phosphorylation of glucose during glucose metabolism; expression is highest during growth on non-glucose carbon sources; glucose-induced repression involves hexokinase Hxk2p; HXK1 has a paralog, HXK2, that arose from the whole genome duplication [Source:SGD;Acc:S000001949]
YKL162C-A	31.8949	0.610222	0.198114	3.04143	0.00235457	0.00740614	YKL162C-A	Dubious open reading frame; unlikely to encode a functional protein, based on available experimental and comparative sequence data [Source:SGD;Acc:S000007244]
YHL022C	35.513	-0.672169	0.19797	-3.48712	0.000488249	0.00185794	SPO11	Meiosis-specific protein that initiates meiotic recombination; initiates meiotic recombination by catalyzing the formation of double-strand breaks in DNA via a transesterification reaction; required for homologous chromosome pairing and synaptonemal complex formation [Source:SGD;Acc:S000001014]
YIR027C	39.7202	-0.754107	0.197966	-4.13439	3.55906e-05	0.000182416	DAL1	Allantoinase; converts allantoin to allantoate in the first step of allantoin degradation; expression sensitive to nitrogen catabolite repression [Source:SGD;Acc:S000001466]
YMR232W	44.6656	-0.326067	0.197849	-1.70067	0.0890055	0.161162	FUS2	Cell fusion regulator; cytoplasmic protein localized to shmoo tip; required for alignment of parental nuclei before nuclear fusion during mating; contains a Dbl-homology domain; binds specifically with activated Cdc42p [Source:SGD;Acc:S000004845]
YOL160W	14.9264	0.20205	0.19784	0.894222	0.371203	0.501123	YOL160W	Putative protein of unknown function; conserved across S. cerevisiae strains [Source:SGD;Acc:S000005520]
YJL219W	20.6157	-0.056197	0.197807	-0.187219	0.851489	0.904262	HXT9	Putative hexose transporter that is nearly identical to Hxt11p; has similarity to major facilitator superfamily (MFS) transporters, expression of HXT9 is regulated by transcription factors Pdr1p and Pdr3p [Source:SGD;Acc:S000003755]
YLR081W	12.185	-0.239115	0.197807	-1.32316	0.185782	0.293502	GAL2	Galactose permease; required for utilization of galactose; also able to transport glucose [Source:SGD;Acc:S000004071]
YMR153C-A	12.5081	-0.315657	0.197791	-1.5346	0.124882	0.213706	YMR153C-A	Dubious open reading frame; unlikely to encode a functional protein, based on available experimental and comparative sequence data; almost completely overlaps 3' end of verified gene NUP53/YMR153W [Source:SGD;Acc:S000004761]
YNL034W	14.6343	-0.277298	0.197757	-1.59141	0.111517	0.194375	YNL034W	Putative protein of unknown function; not an essential gene; YNL034W has a paralog, YNL018C, that arose from a segmental duplication [Source:SGD;Acc:S000004979]
YGR030C	148.226	0.527366	0.197688	2.48383	0.0129979	0.0320065	POP6	Subunit of RNase MRP, nuclear RNase P and telomerase; forms a soluble heterodimer with Pop7p that binds P3 domain of RNase MRP and RNase P RNAs; RNase MRP cleaves pre-rRNA, nuclear RNase P cleaves tRNA precursors to generate mature 5' ends and facilitates turnover of nuclear RNAs, while telomerase replenishes telomeric DNA; relocalizes to the cytosol in response to hypoxia [Source:SGD;Acc:S000003…
YNR002C	41.5447	0.21552	0.19767	1.01734	0.308991	0.436443	ATO2	Putative transmembrane protein involved in export of ammonia; ammonia is a starvation signal that promotes cell death in aging colonies; phosphorylated in mitochondria; member of the TC 9.B.33 YaaH family; homolog of Y. lipolytica Gpr1p; ATO2 has a paralog, ADY2, that arose from the whole genome duplication [Source:SGD;Acc:S000005285]
YMR194C-A	22.1903	-0.121239	0.197624	-0.5734	0.566374	0.683952	YMR194C-A	Dubious open reading frame; unlikely to encode a functional protein, based on available experimental and comparative sequence data [Source:SGD;Acc:S000007250]
YLR054C	81.5772	0.170628	0.197597	0.705278	0.480638	0.606847	OSW2	Protein of unknown function reputedly involved in spore wall assembly [Source:SGD;Acc:S000004044]
YML084W	15.2011	0.362052	0.197578	1.77276	0.0762685	0.142274	YML084W	Dubious open reading frame; unlikely to encode a functional protein, based on available experimental and comparative sequence data [Source:SGD;Acc:S000004549]
snR67	48.7649	-0.0992124	0.197516	-0.461924	0.644136	0.749665	snR67	C/D box small nucleolar RNA (snoRNA); guides 2'-O-methylation of large subunit (LSU) rRNA at positions G2619 and U2724 [Source:SGD;Acc:S000006458]
YHR015W	89.9171	-0.589839	0.197477	-3.06953	0.00214393	0.00686362	MIP6	Putative RNA-binding protein; interacts with Mex67p, which is a component of the nuclear pore involved in nuclear mRNA export; MIP6 has a paralog, PES4, that arose from the whole genome duplication [Source:SGD;Acc:S000001057]
YPR001W	44.8938	-0.355354	0.197469	-1.86563	0.062093	0.120213	CIT3	Dual specificity mitochondrial citrate and methylcitrate synthase; catalyzes the condensation of acetyl-CoA and oxaloacetate to form citrate and that of propionyl-CoA and oxaloacetate to form 2-methylcitrate [Source:SGD;Acc:S000006205]
YGR059W	11.2514	0.0161301	0.19746	0.0994454	0.920785	0.949913	SPR3	Sporulation-specific homolog of the CDC3/10/11/12 family of genes; septin protein involved in sporulation; regulated by ABFI; the yeast CDC3/10/11/12 family is a family of bud neck microfilament genes [Source:SGD;Acc:S000003291]
YBR076W	31.7115	-0.134857	0.197383	-0.727313	0.467034	0.594441	ECM8	Non-essential protein of unknown function [Source:SGD;Acc:S000000280]
YKR034W	16.2642	0.0679911	0.197377	0.292614	0.769817	0.848998	DAL80	Negative regulator of genes in multiple nitrogen degradation pathways; expression is regulated by nitrogen levels and by Gln3p; member of the GATA-binding family, forms homodimers and heterodimers with Gzf3p; DAL80 has a paralog, GZF3, that arose from the whole genome duplication [Source:SGD;Acc:S000001742]
YKL036C	11.797	0.549672	0.197344	2.83163	0.0046312	0.0131835	YKL036C	Dubious open reading frame; unlikely to encode a functional protein, based on available experimental and comparative sequence data; not conserved in closely related Saccharomyces species; partially overlaps the essential gene UGP1 gene and uncharacterized ORF YKL037W [Source:SGD;Acc:S000001519]
YGR248W	46.701	0.481172	0.197246	2.24612	0.0246966	0.0551403	SOL4	6-phosphogluconolactonase; protein abundance increases in response to DNA replication stress; SOL4 has a paralog, SOL3, that arose from the whole genome duplication [Source:SGD;Acc:S000003480]
YBR093C	192.226	-0.36106	0.197193	-1.55934	0.118916	0.205226	PHO5	Repressible acid phosphatase; 1 of 3 repressible acid phosphatases that also mediates extracellular nucleotide-derived phosphate hydrolysis; secretory pathway derived cell surface glycoprotein; induced by phosphate starvation and coordinately regulated by PHO4 and PHO2 [Source:SGD;Acc:S000000297]
YAR019W-A	30.3163	0.613192	0.197167	3.10648	0.00189328	0.00615513	YAR019W-A	Dubious open reading frame; unlikely to encode a functional protein, based on available experimental and comparative sequence data; partially overlaps ORF CDC15/YAR019C [Source:SGD;Acc:S000028735]
YLR031W	18.941	0.296823	0.197103	1.33057	0.183329	0.290137	YLR031W	Putative protein of unknown function; S288C contains an in-frame stop codon between ORFs YLR030W and YLR031W; YLR031W has a paralog, YMR124W, that arose from the whole genome duplication [Source:SGD;Acc:S000004021]
YPL056C	31.5269	-0.130603	0.197098	-0.687463	0.491791	0.617215	LCL1	Putative protein of unknown function; deletion mutant is fluconazole resistant and has long chronological lifespan [Source:SGD;Acc:S000005977]
YFL020C	11.0561	0.532885	0.197077	2.34954	0.0187967	0.0437848	PAU5	Member of the seripauperin multigene family; encoded mainly in subtelomeric regions; induced during alcoholic fermentation; induced by low temperature and also by anaerobic conditions; negatively regulated by oxygen and repressed by heme [Source:SGD;Acc:S000001874]
YBR099C	43.2995	0.143416	0.197073	0.707299	0.47938	0.605868	YBR099C	Dubious open reading frame; unlikely to encode a functional protein, based on available experimental and comparative sequence data; completely overlaps the verified gene MMS4 [Source:SGD;Acc:S000000303]
YDR367W	1222.84	0.0279098	0.197007	0.137775	0.890418	0.92971	KEI1	Component of inositol phosphorylceramide (IPC) synthase; forms a complex with Aur1p and regulates its activity; required for IPC synthase complex localization to the Golgi; post-translationally processed by Kex2p; KEI1 is an essential gene [Source:SGD;Acc:S000002775]
YOL163W	46.109	0.0314599	0.196992	0.0923838	0.926393	0.952503	YOL163W	Putative protein of unknown function; member of the Dal5p subfamily of the major facilitator family [Source:SGD;Acc:S000005523]
YER084W	11.1227	-0.42107	0.196965	-2.47164	0.0134493	0.0329762	YER084W	Protein of unknown function; expressed at both mRNA and protein levels [Source:SGD;Acc:S000000886]
YKL023C-A	111.709	-0.052223	0.196922	-0.199176	0.842125	0.899255	YKL023C-A	Putative protein of unknown function [Source:SGD;Acc:S000113559]
YNL092W	39.8074	0.320944	0.196913	1.5618	0.118336	0.204336	YNL092W	S-adenosylmethionine-dependent protein methyltransferase; capable of automethylation; member of the seven beta-strand family; YNL092W is not an essential gene [Source:SGD;Acc:S000005036]
YGR213C	146.758	0.083112	0.196891	0.238831	0.811237	0.878514	RTA1	Protein involved in 7-aminocholesterol resistance; has seven potential membrane-spanning regions; expression is induced under both low-heme and low-oxygen conditions; member of the fungal lipid-translocating exporter (LTE) family of protein; RTA1 has a paralog, YLR046C, that arose from the whole genome duplication [Source:SGD;Acc:S000003445]
YDL071C	33.9926	0.725492	0.196846	3.63853	0.000274199	0.00111271	YDL071C	Dubious open reading frame; unlikely to encode a functional protein, based on available experimental and comparative sequence data; partially overlaps the verified ORF BDF2/YDL070W [Source:SGD;Acc:S000002229]
YOR383C	1366.17	-0.918516	0.196826	-5.23922	1.61255e-07	1.3302e-06	FIT3	Mannoprotein that is incorporated into the cell wall; incorporated via a glycosylphosphatidylinositol (GPI) anchor; involved in the retention of siderophore-iron in the cell wall [Source:SGD;Acc:S000005910]
YJR087W	47.0161	0.146603	0.196783	0.766093	0.443621	0.572162	YJR087W	Dubious open reading frame; unlikely to encode a functional protein, based on available experimental and comparative sequence data; not conserved in closely related Saccharomyces species; partially overlaps the verified genes STE18 and ECM2 [Source:SGD;Acc:S000003847]
YBR250W	53.1185	0.209201	0.19678	1.03585	0.300272	0.426617	SPO23	Protein of unknown function; associates with meiosis-specific protein Spo1p [Source:SGD;Acc:S000000454]
snR33	190.252	0.451574	0.196722	2.16338	0.030512	0.0661759	snR33	H/ACA box small nucleolar RNA (snoRNA); guides pseudouridylation of large subunit (LSU) rRNA at position U1042 [Source:SGD;Acc:S000007298]
tW(CCA)P	13.7589	0.357702	0.196703	1.5116	0.130635	0.221205	tW(CCA)P	Tryptophan tRNA (tRNA-Trp), predicted by tRNAscan-SE analysis [Source:SGD;Acc:S000006776]
YJR160C	34.7253	0.302192	0.196648	1.55198	0.120667	0.207742	MPH3	Alpha-glucoside permease; transports maltose, maltotriose, alpha-methylglucoside, and turanose; identical to Mph2p; encoded in a subtelomeric position in a region likely to have undergone duplication [Source:SGD;Acc:S000003921]
YHR056W-A	9.42897	0.329533	0.196607	1.68346	0.0922867	0.16629	YHR056W-A	Dubious open reading frame; unlikely to encode a functional protein, based on available experimental and comparative sequence data; completely overlaps ORF RSC30/YHR056C [Source:SGD;Acc:S000028777]
YDR342C	55.1142	-0.0575118	0.196365	-0.306311	0.759368	0.842791	HXT7	High-affinity glucose transporter; member of the major facilitator superfamily, nearly identical to Hxt6p, expressed at high basal levels relative to other HXTs, expression repressed by high glucose levels; HXT7 has a paralog, HXT4, that arose from the whole genome duplication [Source:SGD;Acc:S000002750]
YJL211C	12.0213	-0.296094	0.196207	-1.86425	0.062287	0.120552	YJL211C	Dubious open reading frame; unlikely to encode a functional protein, based on available experimental and comparative sequence data; partially overlaps the verified gene YJL210W/PEX2 [Source:SGD;Acc:S000003747]
YGL205W	12.8226	-0.0207159	0.196191	0.00543208	0.995666	0.996933	POX1	Fatty-acyl coenzyme A oxidase; involved in the fatty acid beta-oxidation pathway; localized to the peroxisomal matrix [Source:SGD;Acc:S000003173]
YCR105W	34.4989	-0.118016	0.196188	-0.569333	0.56913	0.686359	ADH7	NADPH-dependent medium chain alcohol dehydrogenase; has broad substrate specificity; member of the cinnamyl family of alcohol dehydrogenases; may be involved in fusel alcohol synthesis or in aldehyde tolerance [Source:SGD;Acc:S000000702]
YDR034W-B	50.7264	1.03273	0.196187	4.78692	1.69362e-06	1.16857e-05	YDR034W-B	Predicted tail-anchored plasma membrane protein; contains conserved CYSTM module; related proteins in other organisms may be involved in response to stress; N- and C-terminal fusion proteins localize to the cell periphery; YDR034W-B has a paralog, YBR056W-A, that arose from the whole genome duplication [Source:SGD;Acc:S000007234]
YBR148W	49.5664	-0.720256	0.196174	-3.77039	0.000162993	0.000700738	YSW1	Protein required for normal prospore membrane formation; interacts with Gip1p, which is the meiosis-specific regulatory subunit of the Glc7p protein phosphatase; expressed specifically in spores and localizes to the prospore membrane; YSW1 has a paralog, SPO21, that arose from the whole genome duplication [Source:SGD;Acc:S000000352]
YIL012W	13.9989	-0.046543	0.196162	-0.217141	0.828099	0.890645	YIL012W	Putative protein of unknown function; conserved across S. cerevisiae strains [Source:SGD;Acc:S000001274]
snR31	97.9394	0.399928	0.196118	2.06234	0.0391755	0.0816458	snR31	H/ACA box small nucleolar RNA (snoRNA); guides pseudouridylation of small subunit (SSU) rRNA at position U999 [Source:SGD;Acc:S000007296]
YGR073C	34.7097	0.577828	0.196105	2.80985	0.00495639	0.0140016	YGR073C	Dubious open reading frame; unlikely to encode a functional protein, based on available experimental and comparative sequence data; extensively overlaps essential SMD1 gene encoding a U6 snRNP protein [Source:SGD;Acc:S000003305]
YDR344C	42.6989	-0.426482	0.196075	-2.25455	0.0241614	0.0540412	YDR344C	Putative protein of unknown function; conserved among S. cerevisiae strains [Source:SGD;Acc:S000002752]
YGR243W	35.6652	1.27906	0.196065	6.05426	1.41064e-09	1.62611e-08	MPC3	Highly conserved subunit of the mitochondrial pyruvate carrier (MPC); expressed during growth on nonfermentable carbon sources, and heterodimerizes with Mpc1p to form the respiratory isoform of MPC; MPC localizes to the mitochondrial inner membrane and mediates pyruvate uptake; MPC3 paralog, MPC2, heterodimerizes with Mpc1p to form the fermentative MPC isoform; protein abundance increases in resp…
YPR195C	41.9765	0.341602	0.196047	1.71905	0.0856047	0.155947	YPR195C	Putative protein of unknown function; conserved across S. cerevisiae strains [Source:SGD;Acc:S000006399]
YJL037W	12.6397	-0.242784	0.196041	-1.33282	0.182589	0.289111	IRC18	Protein involved in outer spore wall assembly; possible role in assembly of the dityrosine layer; similar to adjacent ORF, LOH1; irc18 loh1 double mutant exhibits reduced dityrosine fluorescence relative to single mutants; SWAT-GFP fusion protein localizes to the ER and vacuole, while mCherry fusion localizes to the vacuole; expression induced in respiratory-deficient cells and carbon-limited che…
YPL186C	43.8587	0.685167	0.196027	3.4402	0.000581276	0.0021816	UIP4	Protein that interacts with Ulp1p; a Ubl (ubiquitin-like protein)-specific protease for Smt3p protein conjugates; detected in a phosphorylated state in the mitochondrial outer membrane; also detected in ER and nuclear envelope [Source:SGD;Acc:S000006107]
YOR161W-A	13.0423	-0.674108	0.196017	-3.91821	8.92084e-05	0.000412548	YOR161W-A	Protein of unknown function; identified by gene-trapping, microarray-based expression analysis, and genome-wide homology searching [Source:SGD;Acc:S000028713]
YOL156W	14.5793	0.371402	0.196002	2.05433	0.0399436	0.0829172	HXT11	Hexose transporter; capable of transporting a broad range of substrates including: glucose, fructose, mannose and galactose; polyol transporter that supports the growth on and uptake of xylitol with low affinity when overexpressed in a strain deleted for hexose family members; nearly identical in sequence to Hxt9p; has similarity to major facilitator superfamily (MFS) transporters; involved in pl…
YBR186W	10.7309	0.565548	0.195954	2.7015	0.00690275	0.0185587	PCH2	Hexameric ring ATPase that remodels chromosome axis protein Hop1p; nucleolar component of the pachytene checkpoint, which prevents chromosome segregation when recombination and chromosome synapsis are defective; also represses meiotic interhomolog recombination in rDNA; required for meiotic double-stranded break formation [Source:SGD;Acc:S000000390]
YGR107W	12.7089	0.176741	0.195897	0.901393	0.367379	0.497694	YGR107W	Dubious open reading frame; unlikely to encode a functional protein, based on available experimental and comparative sequence data [Source:SGD;Acc:S000003339]
YLR285C-A	10.2915	-0.235392	0.195854	-1.14157	0.253633	0.37307	YLR285C-A	Putative protein of unknown function; identified by fungal homology and RT-PCR [Source:SGD;Acc:S000028569]
YPL165C	59.0709	0.623521	0.195844	3.08274	0.00205106	0.00658977	SET6	SET domain protein of unknown function; deletion heterozygote is sensitive to compounds that target ergosterol biosynthesis, may be involved in compound availability [Source:SGD;Acc:S000006086]
YHR007C-A	11.8967	0.359762	0.195835	1.58354	0.113299	0.197099	YHR007C-A	Putative protein of unknown function; identified by expression profiling and mass spectrometry; SWAT-GFP fusion protein localizes to the nucleus [Source:SGD;Acc:S000028830]
YEL073C	63.8888	0.499187	0.195718	2.33184	0.019709	0.0454557	YEL073C	Putative protein of unknown function; located adjacent to ARS503 and the telomere on the left arm of chromosome V; regulated by inositol/choline [Source:SGD;Acc:S000000799]
YLR437C-A	10.5093	0.144506	0.195714	0.699904	0.483987	0.610105	YLR437C-A	Dubious open reading frame; unlikely to encode a functional protein, based on available experimental and comparative sequence data; partially overlaps the verified ORF CAR2/YLR438W [Source:SGD;Acc:S000028684]
YER039C-A	10.6481	-0.101029	0.195582	-0.537916	0.590635	0.703797	YER039C-A	Putative protein of unknown function; YER039C-A is not an essential gene [Source:SGD;Acc:S000007226]
YBR230W-A	55.2963	0.154089	0.195528	0.794465	0.426925	0.555868	YBR230W-A	Putative protein of unknown function; YBR230W-A has a paralog, COQ8, that arose from the whole genome duplication [Source:SGD;Acc:S000029722]
YFL051C	14.3538	-0.50684	0.195449	-2.94527	0.00322675	0.00965724	YFL051C	Putative protein of unknown function; SWAT-GFP fusion protein localizes to the cell periphery while mCherry fusion protein localizes to both the cell periphery and vacuole; YFL051C is not an essential gene [Source:SGD;Acc:S000001843]
YMR101C	10.678	-0.0977036	0.195402	-0.474783	0.634942	0.741158	SRT1	Forms the dehydrodolichyl diphosphate syntase (DDS) complex with NUS1; involved in synthesis of long-chain dolichols (19-22 isoprene units; as opposed to Rer2p which synthesizes shorter-chain dolichols); localizes to lipid bodies; transcription is induced during stationary phase [Source:SGD;Acc:S000004707]
YLL025W	40.7681	0.554635	0.195397	2.782	0.00540252	0.0150536	PAU17	Protein of unknown function; member of the seripauperin multigene family encoded mainly in subtelomeric regions; SWAT-GFP and mCherry fusion proteins localize to the vacuole; YLL025W is not an essential gene [Source:SGD;Acc:S000003948]
YNL194C	12.5952	0.544685	0.195381	2.286	0.0222542	0.0502646	YNL194C	Integral membrane protein; required for sporulation and plasma membrane sphingolipid content; similar to SUR7; GFP-fusion protein is induced in response to the DNA-damaging agent MMS; GFP-fusion protein is more abundant at MCCs (membrane compartment occupied by Can1) in the presence of glycerol and oleate; YNL194C has a paralog, FMP45, that arose from the whole genome duplication [Source:SGD;Acc:…
YER187W	41.7032	0.505567	0.195379	2.51223	0.0119971	0.0298813	YER187W	Putative protein of unknown function; induced in respiratory-deficient cells [Source:SGD;Acc:S000000989]
YFR032C-B	66.6378	0.227595	0.195367	1.22144	0.221921	0.336977	YFR032C-B	Putative protein of unknown function; identified by gene-trapping, microarray-based expression analysis, and genome-wide homology searching [Source:SGD;Acc:S000028630]
YJL214W	45.4317	0.375416	0.195361	1.84608	0.06488	0.124429	HXT8	Protein of unknown function with similarity to hexose transporters; expression is induced by low levels of glucose and repressed by high levels of glucose [Source:SGD;Acc:S000003750]
YPL113C	33.7189	-0.392929	0.195321	-2.04146	0.0412055	0.0850877	YPL113C	Glyoxylate reductase; acts on glyoxylate and hydroxypyruvate substrates; YPL113C is not an essential gene [Source:SGD;Acc:S000006034]
YDR003W-A	11.0775	0.510202	0.195301	2.45533	0.0140756	0.0342583	YDR003W-A	Putative protein of unknown function; identified by expression profiling and mass spectrometry [Source:SGD;Acc:S000028819]
YER147C-A	31.3672	-0.0810513	0.195279	-0.404019	0.686199	0.78469	YER147C-A	Dubious open reading frame; unlikely to encode a functional protein, based on available experimental and comparative sequence data; overlaps ORF SPT15/YER148W [Source:SGD;Acc:S000028759]
YJR029W	85.633	-0.430665	0.195274	-2.18309	0.029029	0.0633614	YJR029W	Retrotransposon TYA Gag and TYB Pol genes; transcribed/translated as one unit; polyprotein is processed to make a nucleocapsid-like protein (Gag), reverse transcriptase (RT), protease (PR), and integrase (IN); similar to retroviral genes [Source:SGD;Acc:S000003790]
YHR153C	48.8781	0.580734	0.195116	2.83105	0.0046396	0.0132015	SPO16	Meiosis-specific protein involved in synaptonemal complex assembly; implicated in regulation of crossover formation; required for sporulation [Source:SGD;Acc:S000001196]
YBR180W	11.7282	-0.326854	0.195094	-1.65755	0.097409	0.173828	DTR1	Putative dityrosine transporter of the major facilitator superfamily; member of the 12-spanner drug:H(+) antiporter DHA1 family; required for spore wall synthesis; sequence similarity to QDR1 and QDR3, and the triple mutant dtr1 qdr1 qdr3 exhibits reduced dityrosine fluorescence relative to the single mutants; expressed during sporulation [Source:SGD;Acc:S000000384]
YIL027C	643.503	0.453677	0.195037	2.23246	0.0255843	0.0567599	YIL027C	Member of conserved ER transmembrane complex; required for efficient folding of proteins in the ER; null mutant displays induction of the unfolded protein response, and also shows K1 killer toxin resistance; homologous to worm B0334.15/EMC-5, fly CG15168, human MMGT [Source:SGD;Acc:S000001289]
YDR106W	15.2501	0.164511	0.194989	0.790691	0.429124	0.557693	ARP10	Component of the dynactin complex; localized to the pointed end of the Arp1p filament; may regulate membrane association of the complex [Source:SGD;Acc:S000002513]
YPL283C	11.0671	-0.0560743	0.194975	-0.246352	0.80541	0.874159	YRF1-7	Helicase encoded by the Y' element of subtelomeric regions; highly expressed in the mutants lacking the telomerase component TLC1; potentially phosphorylated by Cdc28p [Source:SGD;Acc:S000006204]
snR41	75.5677	0.418145	0.194933	2.12067	0.0339492	0.0722368	snR41	C/D box small nucleolar RNA (snoRNA); guides 2'-O-methylation of small subunit (SSU) rRNA at positions A541 and G1126 [Source:SGD;Acc:S000007305]
YOR142W-B	48.0681	-0.0737794	0.19492	-0.427457	0.669047	0.770959	YOR142W-B	Retrotransposon TYA Gag and TYB Pol genes; transcribed/translated as one unit; polyprotein is processed to make a nucleocapsid-like protein (Gag), reverse transcriptase (RT), protease (PR), and integrase (IN); similar to retroviral genes [Source:SGD;Acc:S000007352]
snR43	30.1474	-0.00157854	0.19481	0.022362	0.982159	0.987538	snR43	H/ACA box small nucleolar RNA (snoRNA); guides pseudouridylation of large subunit (LSU) rRNA at position U966 and of 5.8S rRNA at position 73 [Source:SGD;Acc:S000006503]
YLL062C	161.1	0.338913	0.194793	1.66919	0.0950802	0.170446	MHT1	S-methylmethionine-homocysteine methyltransferase; functions along with Sam4p in the conversion of S-adenosylmethionine (AdoMet) to methionine to control the methionine/AdoMet ratio [Source:SGD;Acc:S000003985]
YBR201C-A	67.0294	-0.0638296	0.194784	-0.472505	0.636567	0.742366	YBR201C-A	Putative protein of unknown function [Source:SGD;Acc:S000087085]
YGR142W	642.528	-0.310875	0.194763	-1.52277	0.127816	0.217779	BTN2	v-SNARE binding protein; facilitates specific protein retrieval from a late endosome to the Golgi; modulates arginine uptake, possible role in mediating pH homeostasis between the vacuole and plasma membrane H(+)-ATPase; contributes to prion curing; preferentially expressed after severe ethanol stress [Source:SGD;Acc:S000003374]
YFL061W	10.3481	0.791693	0.194724	3.66654	0.000245852	0.00100939	DDI2	Cyanamide hydratase that detoxifies cyanamide; member of the HD domain metalloprotein superfamily; expression is induced over 100-fold by cyanamide and by SN2-type DNA alkylating agents such as MMS and DMA; induction decreased in rad6 and rad18 mutants; gene and protein are identical to DDI3 and Ddi3p [Source:SGD;Acc:S000001833]
YDL187C	30.544	0.656947	0.194723	3.26132	0.00110895	0.00384557	YDL187C	Dubious open reading frame; unlikely to encode a functional protein, based on available experimental and comparative sequence data [Source:SGD;Acc:S000002346]
YDR523C	36.4792	-0.357038	0.19469	-1.90217	0.0571487	0.112002	SPS1	Putative protein serine/threonine kinase; localizes to the nucleus and cytoplasm; required for efficient spore packaging, prospore membrane development and closure and localization of enzymes involved in spore wall synthesis; interacts with and required for Ssp1p phosphorylation and turnover; member of the GCKIII subfamily of STE20 kinases; multiply phosphorylated on S/T residues; interacts with …
YHR214W	106.756	-0.563504	0.194655	-2.95936	0.00308283	0.00929419	YHR214W	Putative protein of unknown function; predicted to be a glycosylphosphatidylinositol-modified (GPI) protein; YHR214W has a paralog, YAR066W, that arose from a segmental duplication [Source:SGD;Acc:S000001257]
YIL163C	10.9983	-0.0719801	0.194553	-0.3318	0.74004	0.827908	YIL163C	Protein of unknown function; mRNA identified as translated by ribosome profiling data [Source:SGD;Acc:S000001425]
snR39B	17.7586	0.0384268	0.194449	0.20437	0.838065	0.896766	snR39B	C/D box small nucleolar RNA (snoRNA); guides 2'-O-methylation of large subunit (LSU) rRNA at position G805 [Source:SGD;Acc:S000007303]
YJL205C	82.1137	0.407274	0.194271	2.07381	0.0380971	0.0795565	NCE101	Protein of unknown function; involved in secretion of proteins that lack classical secretory signal sequences; SWAT-GFP and mCherry fusion proteins localize to the cytosol [Source:SGD;Acc:S000003742]
YHR157W	32.6326	0.615016	0.194229	3.08488	0.00203637	0.00655261	REC104	Protein involved in early stages of meiotic recombination; required for meiotic crossing over; forms a complex with Rec102p and Spo11p necessary during the initiation of recombination [Source:SGD;Acc:S000001200]
YDL227C	1000.03	-1.86722	0.194216	-11.3114	1.15278e-29	1.68735e-27	HO	Site-specific endonuclease; required for gene conversion at the MAT locus (homothallic switching) through the generation of a ds DNA break; expression restricted to mother cells in late G1 as controlled by Swi4p-Swi6p, Swi5p, and Ash1p [Source:SGD;Acc:S000002386]
YLL046C	11.2541	0.172568	0.194182	0.914112	0.360658	0.491	RNP1	Ribonucleoprotein that contains two RNA recognition motifs (RRM); RNP1 has a paralog, SBP1, that arose from the whole genome duplication [Source:SGD;Acc:S000003969]
YDR214W	1917.89	0.628704	0.194136	3.15153	0.00162418	0.00538881	AHA1	Co-chaperone that binds Hsp82p and activates its ATPase activity; plays a role in determining prion variants; similar to Hch1p; expression is regulated by stresses such as heat shock; protein abundance increases in response to DNA replication stress [Source:SGD;Acc:S000002622]
YDL086C-A	48.585	0.00691868	0.194132	0.0192723	0.984624	0.989061	YDL086C-A	Dubious open reading frame; unlikely to encode a functional protein, based on available experimental and comparative sequence data; overlaps uncharacterized ORF YDL086W; identified by gene-trapping, microarray expression analysis, and genome-wide homology searching [Source:SGD;Acc:S000028611]
YPR053C	63.5753	-0.6259	0.194114	-3.30977	0.000933733	0.00330164	YPR053C	Putative protein of unknown function; conserved among S. cerevisiae strains; YPR053C is not an essential gene; partially overlaps verified ORF NHP6A/YPR052C [Source:SGD;Acc:S000006257]
YAL067C	53.5515	-0.0949335	0.193947	-0.524068	0.600231	0.712534	SEO1	Putative permease; member of the allantoate transporter subfamily of the major facilitator superfamily; mutation confers resistance to ethionine sulfoxide [Source:SGD;Acc:S000000062]
YDR273W	66.1752	-0.177013	0.19389	-0.865456	0.386788	0.517307	DON1	Meiosis-specific component of the spindle pole body; subunit of the leading edge protein (LEP) complex (Ssp1-Ady3-Don1-Irc10) that forms a ring-like structure at the leading edge of the prospore membrane (PSM) during meiosis II; required for PSM growth and closure; DON1 has a paralog, CUE5, that arose from the whole genome [Source:SGD;Acc:S000002681]
NME1	37.3159	0.212535	0.193888	1.08169	0.279391	0.401114	NME1	RNA component of RNase MRP; RNase MRP cleaves pre-rRNA and has a role in cell cycle-regulated degradation of daughter cell-specific mRNAs; human ortholog is implicated in cartilage-hair hypoplasia (CHH) [Source:SGD;Acc:S000007436]
YJR086W	210.941	0.701004	0.193871	3.47595	0.000509039	0.00193122	STE18	G protein gamma subunit; forms a dimer with Ste4p to activate the mating signaling pathway, forms a heterotrimer with Gpa1p and Ste4p to dampen signaling; C-terminus is palmitoylated and farnesylated, which are required for normal signaling [Source:SGD;Acc:S000003846]
YAR071W	48.2785	-0.624527	0.193836	-3.08573	0.00203051	0.00654268	PHO11	One of three repressible acid phosphatases; glycoprotein that is transported to the cell surface by the secretory pathway; induced by phosphate starvation and coordinately regulated by PHO4 and PHO2; PHO11 has a paralog, PHO12, that arose from a segmental duplication [Source:SGD;Acc:S000000094]
YCR010C	11.4209	0.759039	0.193821	3.71559	0.000202731	0.000847834	ADY2	Acetate transporter required for normal sporulation; phosphorylated in mitochondria; ADY2 has a paralog, ATO2, that arose from the whole genome duplication [Source:SGD;Acc:S000000603]
YPL209C	54.7667	0.0027626	0.19377	0.0325094	0.974066	0.982616	IPL1	Aurora kinase of chromosomal passenger complex; mediates release of mono-oriented kinetochores from microtubules in meiosis I, and kinetochore release from SPB clusters at meiotic exit; helps maintain condensed chromosomes during anaphase; required for SPB cohesion and prevention of multipolar spindle formation; promotes telomerase release at G2/M; Iocalizes to nuclear foci that diffuse upon DNA …
YLR366W	9.58063	0.26989	0.193769	1.21328	0.225023	0.340783	YLR366W	Dubious open reading frame; unlikely to encode a functional protein, based on available experimental and comparative sequence data; partially overlaps the dubious ORF YLR364C-A [Source:SGD;Acc:S000004358]
YBL094C	8.79482	-0.0468295	0.193731	-0.420588	0.674056	0.775454	YBL094C	Dubious open reading frame; unlikely to encode a functional protein, based on available experimental and comparative sequence data; partially overlaps uncharacterized ORF YBL095W [Source:SGD;Acc:S000000190]
YER044C-A	77.4602	0.691802	0.193725	3.40655	0.000657885	0.00242573	MEI4	Meiosis-specific protein involved in forming DSBs; involved in double-strand break (DSBs) formation during meiotic recombination; required for chromosome synapsis and production of viable spores [Source:SGD;Acc:S000001954]
YCL040W	1417.29	0.359769	0.193678	1.77754	0.0754794	0.140969	GLK1	Glucokinase; catalyzes the phosphorylation of glucose at C6 in the first irreversible step of glucose metabolism; one of three glucose phosphorylating enzymes; expression regulated by non-fermentable carbon sources; GLK1 has a paralog, EMI2, that arose from the whole genome duplication [Source:SGD;Acc:S000000545]
YER039C	37.3791	0.35792	0.193672	1.81322	0.0697972	0.132246	HVG1	Protein of unknown function; HVG1 has a paralog, VRG4, that arose from the whole genome duplication [Source:SGD;Acc:S000000841]
YJR094C	78.5122	-0.389826	0.193628	-2.01342	0.0440709	0.0899131	IME1	Master regulator of meiosis that is active only during meiotic events; activates transcription of early meiotic genes through interaction with Ume6p; degraded by the 26S proteasome following phosphorylation by Ime2p; transcription is negatively regulated in cis by the IRT1 long noncoding antisense RNA [Source:SGD;Acc:S000003854]
YGR039W	48.0538	-0.0852168	0.193536	-0.455748	0.648571	0.753295	YGR039W	Putative protein of unknown function; conserved among S. cerevisiae strains; YGR039W is not an essential gene [Source:SGD;Acc:S000003271]
snR84	179.845	0.107932	0.193532	0.49191	0.622783	0.731169	snR84	H/ACA box small nucleolar RNA (snoRNA); guides pseudouridylation of large subunit (LSU) rRNA at position U2266; overexpression confers resistance to baking-associated stress [Source:SGD;Acc:S000028466]
YLR124W	49.3461	0.487839	0.193517	2.55038	0.0107604	0.0271993	YLR124W	Dubious open reading frame; unlikely to encode a functional protein, based on available experimental and comparative sequence data [Source:SGD;Acc:S000004114]
snR45	9.81323	-0.132611	0.193508	-0.686858	0.492173	0.617571	snR45	C/D box small nucleolar RNA (snoRNA) but not shown to be active; no target site is predicted within the ribosomal RNAs [Source:SGD;Acc:S000006505]
YFL021C-A	8.84762	0.511491	0.193427	2.4772	0.0132418	0.0325181	YFL021C-A	Dubious open reading frame; unlikely to encode a functional protein, based on available experimental and comparative sequence data; overlaps ORF GAT1/YFL021W [Source:SGD;Acc:S000028766]
YDL068W	9.33712	-0.00178331	0.193316	-0.0579098	0.95382	0.97063	YDL068W	Dubious open reading frame; unlikely to encode a functional protein, based on available experimental and comparative sequence data [Source:SGD;Acc:S000002226]
YMR303C	43.6119	1.01731	0.193216	4.74378	2.0977e-06	1.4212e-05	ADH2	Glucose-repressible alcohol dehydrogenase II; catalyzes the conversion of ethanol to acetaldehyde; involved in the production of certain carboxylate esters; regulated by ADR1 [Source:SGD;Acc:S000004918]
snR59	10.9234	-0.0153873	0.193204	-0.0346331	0.972372	0.981259	snR59	C/D box small nucleolar RNA (snoRNA); guides 2'-O-methylation of large subunit (LSU) rRNA at position A807 [Source:SGD;Acc:S000006450]
YOR365C	7.56154	-0.170958	0.19318	-0.935793	0.34938	0.47898	YOR365C	Putative protein of unknown function; not an essential protein; YOR365C has a paralog, FLC2, that arose from the whole genome duplication [Source:SGD;Acc:S000005892]
YIR014W	41.8253	-0.842801	0.193162	-4.58857	4.46284e-06	2.79494e-05	YIR014W	Putative protein of unknown function; green fluorescent protein (GFP)-fusion protein localizes to the vacuole; expression directly regulated by the metabolic and meiotic transcriptional regulator Ume6p; YIR014W is a non-essential gene [Source:SGD;Acc:S000001453]
YLR109W	9036.04	0.195979	0.193156	1.01579	0.309731	0.437389	AHP1	Thiol-specific peroxiredoxin; reduces hydroperoxides to protect against oxidative damage; function in vivo requires covalent conjugation to Urm1p [Source:SGD;Acc:S000004099]
YDL214C	45.2409	-0.0515417	0.193155	-0.218675	0.826903	0.889511	PRR2	Serine/threonine protein kinase; inhibits pheromone induced signalling downstream of MAPK, possibly at the level of the Ste12p transcription factor; mutant has increased aneuploidy tolerance; PRR2 has a paralog, NPR1, that arose from the whole genome duplication [Source:SGD;Acc:S000002373]
YOR100C	27.9069	1.12918	0.193139	5.45271	4.9607e-08	4.39755e-07	CRC1	Mitochondrial inner membrane carnitine transporter; required for carnitine-dependent transport of acetyl-CoA from peroxisomes to mitochondria during fatty acid beta-oxidation; human homolog SLC25A20 complements yeast null mutant [Source:SGD;Acc:S000005626]
YPL152W-A	9.552	0.219603	0.193134	0.986968	0.323659	0.452489	YPL152W-A	Protein of unknown function; identified by gene-trapping, microarray-based expression analysis, and genome-wide homology searching [Source:SGD;Acc:S000028721]
YHL049C	9.40722	0.0320237	0.193114	0.162338	0.87104	0.917237	YHL049C	Putative protein of unknown function [Source:SGD;Acc:S000001041]
YGR053C	39.632	-0.0562748	0.193031	-0.33388	0.73847	0.826446	YGR053C	Putative protein of unknown function [Source:SGD;Acc:S000003285]
YLR042C	155.693	-0.345737	0.193029	-1.82941	0.0673384	0.128238	YLR042C	Cell wall protein of unknown function; localizes to the cytoplasm; deletion improves xylose fermentation in industrially engineered strains; YLR042C is not an essential gene [Source:SGD;Acc:S000004032]
YNL019C	11.399	-0.458896	0.192919	-2.58675	0.0096886	0.0248797	YNL019C	Putative protein of unknown function; expression induced during heat stress; YNL019C has a paralog, YNL033W, that arose from a segmental duplication [Source:SGD;Acc:S000004964]
YMR256C	744.966	0.589998	0.192877	2.96808	0.00299671	0.00907664	COX7	Subunit VII of cytochrome c oxidase (Complex IV); Complex IV is the terminal member of the mitochondrial inner membrane electron transport chain [Source:SGD;Acc:S000004869]
YGL188C	15.4623	-0.0383482	0.192851	-0.23045	0.817742	0.88328	YGL188C	Dubious open reading frame; unlikely to encode a functional protein, based on available experimental and comparative sequence data [Source:SGD;Acc:S000003156]
YHL006C	48.9166	-0.17219	0.192713	-0.913991	0.360722	0.491	SHU1	Component of Shu complex (aka PCSS complex); Shu complex also includes Psy3, Csm2, Shu2, and promotes error-free DNA repair, mediates inhibition of Srs2p function; essential for promoting the establishment of homolog bias during meiotic homologous recombination; promotes both crossover (CO) and non-crossover (NCO) pathways of meiotic recombination and formation of Rad51p filaments [Source:SGD;Acc…
YHR022C-A	20.1459	-0.171316	0.192707	-0.819332	0.412597	0.54113	YHR022C-A	Putative protein of unknown function; identified by gene-trapping, microarray-based expression analysis, and genome-wide homology searching [Source:SGD;Acc:S000028645]
snR36	11.0771	0.434676	0.192674	1.94693	0.0515434	0.102891	snR36	H/ACA box small nucleolar RNA (snoRNA); guides pseudouridylation of small subunit (SSU) rRNA at position U1187 [Source:SGD;Acc:S000007300]
YDL130W-A	146.782	0.868856	0.192652	4.31913	1.56644e-05	8.73264e-05	STF1	Protein involved in regulation of the mitochondrial F1F0-ATP synthase; Stf1p and Stf2p act as stabilizing factors that enhance inhibitory action of the Inh1p protein; protein abundance increases in response to DNA replication stress; STF1 has a paralog, INH1, that arose from the whole genome duplication [Source:SGD;Acc:S000007232]
snR37	48.5881	-0.588191	0.192637	-2.95008	0.00317695	0.00952632	snR37	H/ACA box small nucleolar RNA (snoRNA); guides pseudouridylation of large subunit (LSU) rRNA at position U2944 [Source:SGD;Acc:S000006501]
YJL077C	8.93954	0.361473	0.192581	1.91499	0.0554942	0.109355	ICS3	Protein with a role in copper homeostasis; possible role in vacuolar sorting and processing of secretory proteins; null mutants are hypersensitive to sortin2 [Source:SGD;Acc:S000003613]
YMR245W	12.8898	0.199947	0.192537	1.11328	0.265587	0.386676	YMR245W	Dubious open reading frame; unlikely to encode a functional protein, based on available experimental and comparative sequence data [Source:SGD;Acc:S000004859]
YDR461C-A	13.2943	0.275235	0.192469	1.24872	0.211769	0.324775	YDR461C-A	Putative protein of unknown function [Source:SGD;Acc:S000087209]
YER175W-A	10.4289	-0.371783	0.192384	-1.7156	0.0862349	0.156905	YER175W-A	Putative protein of unknown function; identified by gene-trapping, microarray-based expression analysis, and genome-wide homology searching [Source:SGD;Acc:S000028625]
YBR196C-A	35.9366	-0.283717	0.192378	-1.45948	0.144433	0.239984	YBR196C-A	Putative protein of unknown function; identified by fungal homology and RT-PCR [Source:SGD;Acc:S000028534]
SRG1	121.272	0.799693	0.192315	3.99873	6.36825e-05	0.000305036	SRG1	Non-protein-coding RNA that regulates the transcription of SER3; expression of SRG1 RNA represses expression of its neighboring gene SER3 via a transcription-interference mechanism [Source:SGD;Acc:S000029010]
YNR025C	12.2521	0.294112	0.192305	1.33604	0.181537	0.287663	YNR025C	Dubious open reading frame; unlikely to encode a functional protein, based on available experimental and comparative sequence data; deletion reduces expression of PIS1 gene encoding phosphatidylinositol synthase [Source:SGD;Acc:S000005308]
YCR024C-A	2894.63	0.141583	0.192278	0.713988	0.475234	0.601508	PMP1	Regulatory subunit for the plasma membrane H(+)-ATPase Pma1p; small single-membrane span proteolipid; forms unique helix and positively charged cytoplasmic domain that is able to specifically segregate phosphatidylserines; PMP1 has a paralog, PMP2, that arose from the whole genome duplication [Source:SGD;Acc:S000000619]
YMR280C	39.9187	-0.463011	0.192223	-2.43657	0.0148272	0.0358105	CAT8	Zinc cluster transcriptional activator; necessary for derepression of a variety of genes under non-fermentative growth conditions, active after diauxic shift, binds carbon source responsive elements; relative distribution to the nucleus increases upon DNA replication stress [Source:SGD;Acc:S000004893]
YOR013W	12.4038	0.245537	0.192209	1.28561	0.198578	0.309876	IRC11	Dubious open reading frame; unlikely to encode a functional protein, based on available experimental and comparative sequence data; partially overlaps the uncharacterized gene YOR012C; null mutant displays increased levels of spontaneous Rad52 foci [Source:SGD;Acc:S000005539]
YLR343W	81.1603	0.215203	0.192158	1.17472	0.240107	0.357587	GAS2	1,3-beta-glucanosyltransferase; involved with Gas4p in spore wall assembly; has similarity to Gas1p [Source:SGD;Acc:S000004335]
YBL006W-A	14.6105	0.116671	0.192122	0.61874	0.536088	0.656319	YBL006W-A	Dubious open reading frame; unlikely to encode a functional protein, based on available experimental and comparative sequence data; completely overlaps the verified gene LDB7/YBL006C [Source:SGD;Acc:S000028596]
YLR465C	11.1803	-0.108787	0.192026	-0.660639	0.508844	0.633956	BSC3	Dubious open reading frame; unlikely to encode a functional protein, based on available experimental and comparative sequence data; not conserved in closely related Saccharomyces species; 100% of YLR465C overlaps the uncharacterized ORF YLR464W and 86% of YLR465C overlaps the verified gene YRF1-4 [Source:SGD;Acc:S000004457]
YER189W	9.11674	0.112953	0.191967	0.63976	0.522328	0.645374	YER189W	Putative protein of unknown function [Source:SGD;Acc:S000000991]
YMR084W	81.3368	-0.855269	0.191887	-4.74664	2.06822e-06	1.40425e-05	YMR084W	Putative protein of unknown function; YMR084W and adjacent ORF YMR085W are merged in related strains, and together are paralogous to glutamine-fructose-6-phosphate amidotransferase GFA1 [Source:SGD;Acc:S000004689]
YPR204W	225.969	-0.212751	0.191877	-1.3505	0.176856	0.281805	YPR204W	DNA helicase encoded within the telomeric Y' element; Y' -helicase protein 1 [Source:SGD;Acc:S000006408]
YPR150W	10.0664	0.0520658	0.19175	0.186977	0.851679	0.904262	YPR150W	Dubious open reading frame; unlikely to encode a functional protein, based on available experimental and comparative sequence data; partially overlaps the verified gene SUE1/YPR151C [Source:SGD;Acc:S000006354]
YFL053W	21.2967	0.556166	0.19171	2.36126	0.0182131	0.0426464	DAK2	Dihydroxyacetone kinase; required for detoxification of dihydroxyacetone (DHA); involved in stress adaptation [Source:SGD;Acc:S000001841]
YLL042C	40.8438	-0.275925	0.191698	-1.47027	0.141488	0.2359	ATG10	Conserved E2-like conjugating enzyme; mediates formation of the Atg12p-Atg5p conjugate, which is a critical step in autophagy [Source:SGD;Acc:S000003965]
YPL060C-A	11.2358	0.0646208	0.191646	0.322525	0.747055	0.833681	YPL060C-A	TyA Gag protein; the main structural constituent of virus-like particles (VLPs); Gag processing produces capsid proteins [Source:SGD;Acc:S000007388]
YMR307C-A	20.1188	-0.259416	0.191407	-1.06028	0.289015	0.412571	YMR307C-A	Dubious open reading frame; unlikely to encode a functional protein, based on available experimental and comparative sequence data; completely overlaps the verified gene GAS1/YMR307W [Source:SGD;Acc:S000028578]
YDR261C-D	183.362	-0.247996	0.191367	-1.30504	0.191878	0.301168	YDR261C-D	Retrotransposon TYA Gag and TYB Pol genes; Gag processing produces capsid proteins, Pol is cleaved to produce protease, reverse transcriptase and integrase activities; in YDRCTy1-3 TYB is mutant and probably non-functional [Source:SGD;Acc:S000007395]
YOR190W	35.2438	-0.00637508	0.191359	-0.0463993	0.962992	0.975688	SPR1	Sporulation-specific exo-1,3-beta-glucanase; contributes to ascospore thermoresistance; SPR1 has a paralog, EXG1, that arose from the whole genome duplication [Source:SGD;Acc:S000005716]
snR61	12.5184	0.332171	0.191356	1.69881	0.0893555	0.161657	snR61	C/D box small nucleolar RNA (snoRNA); guides 2'-O-methylation of large subunit (LSU) rRNA at position A1133 [Source:SGD;Acc:S000006452]
YMR251W	48.1846	0.126066	0.191325	0.693005	0.488306	0.613821	GTO3	Omega class glutathione transferase; putative cytosolic localization [Source:SGD;Acc:S000004863]
YOR173W	61.8352	-0.0244649	0.191321	-0.263468	0.79219	0.863384	DCS2	m(7)GpppX pyrophosphatase regulator; non-essential, stress induced regulatory protein; modulates m7G-oligoribonucleotide metabolism; inhibits Dcs1p; regulated by Msn2p, Msn4p, and the Ras-cAMP-cAPK signaling pathway; mutant has increased aneuploidy tolerance; DCS2 has a paralog, DCS1, that arose from the whole genome duplication [Source:SGD;Acc:S000005699]
YKL162C	80.2952	0.429933	0.191222	2.15615	0.0310719	0.0671458	YKL162C	Putative protein of unknown function; green fluorescent protein (GFP)-fusion protein localizes to the mitochondrion [Source:SGD;Acc:S000001645]
YLR466W	10.4162	-0.538036	0.191152	-2.73914	0.00616008	0.0168279	YRF1-4	Helicase encoded by the Y' element of subtelomeric regions; highly expressed in the mutants lacking the telomerase component TLC1; potentially phosphorylated by Cdc28p [Source:SGD;Acc:S000004458]
YNL277W	83.9658	-0.808926	0.191102	-4.51285	6.39637e-06	3.8636e-05	MET2	L-homoserine-O-acetyltransferase; catalyzes the conversion of homoserine to O-acetyl homoserine which is the first step of the methionine biosynthetic pathway [Source:SGD;Acc:S000005221]
YPL271W	1165.85	0.269476	0.191033	1.39312	0.163583	0.26625	ATP15	Epsilon subunit of the F1 sector of mitochondrial F1F0 ATP synthase; which is a large, evolutionarily conserved enzyme complex required for ATP synthesis; F1 translationally regulates ATP6 and ATP8 expression to achieve a balanced output of ATP synthase genes encoded in nucleus and mitochondria; phosphorylated [Source:SGD;Acc:S000006192]
YDR179C	68.9932	0.581912	0.191014	2.39537	0.0166038	0.0394059	CSN9	Subunit of the Cop9 signalosome; Cop9 signalosome is required for deneddylation, or removal of the ubiquitin-like protein Rub1p from Cdc53p (cullin); involved in adaptation to pheromone signaling [Source:SGD;Acc:S000002586]
YPL017C	47.1184	1.40511	0.190999	6.85929	6.92052e-12	1.15232e-10	IRC15	Microtubule associated protein; regulates microtubule dynamics; required for accurate meiotic chromosome segregation; null mutant displays large budded cells due to delayed mitotic progression, increased levels of spontaneous Rad52 foci; IRC15 has a paralog, LPD1, that arose from the whole genome duplication [Source:SGD;Acc:S000005938]
YER138W-A	222.689	-0.0637601	0.190966	-0.278063	0.780964	0.855061	YER138W-A	Putative protein of unknown function; YER138W-A has a paralog, YBL107W-A, that arose from a single-locus duplication [Source:SGD;Acc:S000007239]
YOL132W	12.1677	0.271194	0.190964	1.34831	0.177558	0.282567	GAS4	1,3-beta-glucanosyltransferase; involved with Gas2p in spore wall assembly; has similarity to Gas1p; localizes to the cell wall [Source:SGD;Acc:S000005492]
YMR046W-A	9.72755	0.376639	0.190964	1.66979	0.094961	0.170281	YMR046W-A	Dubious open reading frame; unlikely to encode a functional protein, based on available experimental and comparative sequence data [Source:SGD;Acc:S000007248]
YML118W	76.3916	0.397384	0.190859	2.03009	0.0423471	0.0869602	NGL3	3'-5' exonuclease specific for poly-A RNAs; has a domain similar to a magnesium-dependent endonuclease motif in mRNA deadenylase Ccr4p; similar to Ngl1p; NGL3 has a paralog, NGL2, that arose from the whole genome duplication [Source:SGD;Acc:S000004587]
YLL037W	9.1189	0.306824	0.190837	1.65351	0.0982271	0.174991	YLL037W	Dubious open reading frame unlikely to encode a functional protein; overlaps 3' end of essential PRP19 gene encoding an RNA splicing factor [Source:SGD;Acc:S000003960]
YOR178C	45.2243	0.788466	0.190833	3.83985	0.000123107	0.000545659	GAC1	Regulatory subunit for Glc7p type-1 protein phosphatase (PP1); tethers Glc7p to Gsy2p glycogen synthase, binds Hsf1p heat shock transcription factor, required for induction of some HSF-regulated genes under heat shock; GAC1 has a paralog, PIG1, that arose from the whole genome duplication [Source:SGD;Acc:S000005704]
YBR285W	8.90644	0.457078	0.190789	2.30506	0.0211633	0.0481917	YBR285W	Putative protein of unknown function; YBR285W is not an essential gene [Source:SGD;Acc:S000000489]
YOR374W	625.999	1.14064	0.190757	5.75804	8.50976e-09	8.54233e-08	ALD4	Mitochondrial aldehyde dehydrogenase; required for growth on ethanol and conversion of acetaldehyde to acetate; phosphorylated; activity is K+ dependent; utilizes NADP+ or NAD+ equally as coenzymes; expression is glucose repressed; can substitute for cytosolic NADP-dependent aldehyde dehydrogenase when directed to the cytosol; human homolog ALDH2 can complement yeast ald4 mutant [Source:SGD;Acc:S…
YOR049C	113.181	-0.249753	0.190733	-1.2203	0.222352	0.337388	RSB1	Putative sphingoid long-chain base (LCB) efflux transporter; integral membrane transporter that localizes to the plasma membrane and may transport long chain bases (LCBs) from the cytoplasmic side toward the extracytoplasmic side of the membrane; role in glycerophospholipid translocation; suppressor of the sphingoid LCB sensitivity of an LCB-lyase mutation [Source:SGD;Acc:S000005575]
YJL222W	47.8811	0.369727	0.190652	1.95677	0.0503748	0.101006	VTH2	Putative membrane glycoprotein; has strong similarity to Vth1p and Pep1p/Vps10p; may be involved in vacuolar protein sorting [Source:SGD;Acc:S000003758]
YJL156W-A	8.34188	0.128183	0.190619	0.711715	0.476641	0.60289	YJL156W-A	Dubious open reading frame; unlikely to encode a functional protein, based on available experimental and comparative sequence data [Source:SGD;Acc:S000007613]
YEL074W	12.8702	-0.0579072	0.190595	-0.281211	0.778548	0.853691	YEL074W	Dubious open reading frame; unlikely to encode a functional protein, based on available experimental and comparative sequence data; large scale expression analysis showed an increase in mRNA accumulation in strains mutant for exosome components [Source:SGD;Acc:S000000800]
YNL237W	78.2659	0.770593	0.190537	4.00376	6.23441e-05	0.000300685	YTP1	Probable type-III integral membrane protein of unknown function; has regions of similarity to mitochondrial electron transport proteins [Source:SGD;Acc:S000005181]
YMR069W	53.845	-0.208051	0.190455	-1.10617	0.268655	0.389881	NAT4	N alpha-acetyl-transferase; involved in acetylation of the N-terminal residues of histones H4 and H2A [Source:SGD;Acc:S000004673]
YER054C	41.8051	0.355734	0.190447	1.82392	0.0681648	0.129605	GIP2	Putative regulatory subunit of protein phosphatase Glc7p; involved in glycogen metabolism; contains a conserved motif (GVNK motif) that is also found in Gac1p, Pig1p, and Pig2p; GIP2 has a paralog, PIG2, that arose from the whole genome duplication [Source:SGD;Acc:S000000856]
YGL123C-A	9.97741	0.288855	0.190425	1.21597	0.223998	0.339475	YGL123C-A	Dubious open reading frame; unlikely to encode a functional protein, based on available experimental and comparative sequence data; overlaps the verified gene RPS2/YGL123W [Source:SGD;Acc:S000028634]
YBR090C	36.2698	0.716882	0.19042	3.56202	0.000368013	0.00144294	YBR090C	Putative protein of unknown function; green fluorescent protein (GFP)-fusion protein localizes to the cytoplasm and nucleus [Source:SGD;Acc:S000000294]
YLL059C	64.355	0.43304	0.190384	2.19535	0.0281387	0.0616876	YLL059C	Dubious open reading frame; unlikely to encode a functional protein, based on available experimental and comparative sequence data [Source:SGD;Acc:S000003982]
YGR236C	12.8119	-0.0715578	0.190315	-0.187754	0.851069	0.904262	SPG1	Protein required for high temperature survival during stationary phase; not required for growth on nonfermentable carbon sources; the authentic, non-tagged protein is detected in highly purified mitochondria in high-throughput studies [Source:SGD;Acc:S000003468]
YEL057C	42.8651	0.074129	0.190296	0.33912	0.73452	0.823342	SDD1	Protein of unknown function; overproduction suppresses lethality due to expression of the dominant PET9 allele AAC2-A128P; may have a role in telomere maintenance; target of UME6 regulation [Source:SGD;Acc:S000000783]
YER088C-A	82.5228	0.103879	0.190291	0.5453	0.585547	0.699456	YER088C-A	Dubious open reading frame; unlikely to encode a functional protein, based on available experimental and comparative sequence data; overlaps ORFs PTC2/YER089C and YER088W-B [Source:SGD;Acc:S000028754]
YDR134C	392.279	0.248842	0.190264	1.24718	0.212331	0.325557	NA	NA
YGL069C	7.34001	0.17775	0.190252	0.891573	0.372622	0.50188	YGL069C	Dubious open reading frame; unlikely to encode a functional protein, based on available experimental and comparative sequence data; not conserved in closely related Saccharomyces species; 92% of ORF overlaps the uncharacterized ORF YGL068W; deletion in cyr1 mutant results in loss of stress resistance [Source:SGD;Acc:S000003037]
YOR360C	1948.39	0.489909	0.190206	2.48814	0.0128414	0.0316956	PDE2	High-affinity cyclic AMP phosphodiesterase; component of the cAMP-dependent protein kinase signaling system, protects the cell from extracellular cAMP, contains readthrough motif surrounding termination codon [Source:SGD;Acc:S000005887]
YKR106W	50.7346	0.222067	0.190206	1.17059	0.241765	0.359563	GEX2	Proton:glutathione antiporter; localized to the vacuolar and plasma membranes; expressed at a very low level; potential role in resistance to oxidative stress and modulation of the PKA pathway; GEX2 has a paralog, GEX1, that arose from a segmental duplication [Source:SGD;Acc:S000001814]
YJL161W	49.1134	1.08763	0.190195	5.43698	5.4191e-08	4.76366e-07	FMP33	Putative protein of unknown function; the authentic, non-tagged protein is detected in highly purified mitochondria in high-throughput studies [Source:SGD;Acc:S000003697]
YPR145C-A	191.308	-0.15801	0.190134	-1.2127	0.225245	0.341037	YPR145C-A	Putative protein of unknown function [Source:SGD;Acc:S000113589]
YNL128W	34.0993	0.270525	0.190067	1.42001	0.155605	0.255713	TEP1	PTEN homolog with no demonstrated inositol lipid phosphatase activity; plays a role in normal sporulation; homolog of human tumor suppressor gene PTEN/MMAC1/TEP1 and fission yeast ptn1 [Source:SGD;Acc:S000005072]
YLR349W	8.81158	-0.464376	0.190001	-2.7272	0.00638734	0.0173509	YLR349W	Dubious open reading frame; unlikely to encode a functional protein, based on available experimental and comparative sequence data; overlaps the verified ORF DIC1/YLR348C [Source:SGD;Acc:S000004341]
YLR346C	66.4677	-0.479107	0.189995	-2.55394	0.0106511	0.0269553	CIS1	Protein of unknown function found in mitochondria; expression is regulated by transcription factors involved in pleiotropic drug resistance, Pdr1p and Yrr1p; not an essential gene; YLR346C has a paralog, YGR035C, that arose from the whole genome duplication [Source:SGD;Acc:S000004338]
YLR092W	47.3469	-0.152254	0.189965	-0.798236	0.424734	0.553588	SUL2	High affinity sulfate permease; sulfate uptake is mediated by specific sulfate transporters Sul1p and Sul2p, which control the concentration of endogenous activated sulfate intermediates [Source:SGD;Acc:S000004082]
YML100W	780.416	-0.294315	0.189939	-1.66695	0.0955253	0.171049	TSL1	Large subunit of trehalose 6-phosphate synthase/phosphatase complex; Tps1p-Tps2p complex converts uridine-5'-diphosphoglucose and glucose 6-phosphate to trehalose; contributes to survival to acute lethal heat stress; mutant has aneuploidy tolerance; protein abundance increases in response to DNA replication stress; TSL1 has a paralog, TPS3, that arose from the whole genome duplication [Source:SGD…
YGL183C	13.4675	0.10503	0.189877	0.538364	0.590326	0.703695	MND1	Protein required for recombination and meiotic nuclear division; forms a complex with Hop2p, which is involved in chromosome pairing and repair of meiotic double-strand breaks [Source:SGD;Acc:S000003151]
YIL173W	46.2589	0.055658	0.189842	0.290801	0.771204	0.849485	VTH1	Putative membrane glycoprotein; has strong similarity to Vth2p and Pep1p/Vps10p; may be involved in vacuolar protein sorting [Source:SGD;Acc:S000001435]
YJL027C	6.78228	0.199293	0.189787	0.959709	0.337201	0.46686	YJL027C	Putative protein of unknown function [Source:SGD;Acc:S000003564]
YFL003C	54.0883	0.220832	0.189723	1.12361	0.261179	0.38185	MSH4	Protein involved in meiotic recombination; required for normal levels of crossing over, colocalizes with Zip2p to discrete foci on meiotic chromosomes, has homology to bacterial MutS protein [Source:SGD;Acc:S000001891]
YLR438W	73.3409	0.38035	0.189633	1.9806	0.0476366	0.0963448	CAR2	L-ornithine transaminase (OTAse); catalyzes the second step of arginine degradation, expression is dually-regulated by allophanate induction and a specific arginine induction process; not nitrogen catabolite repression sensitive; protein abundance increases in response to DNA replication stress; human homolog OAT complements yeast null mutant [Source:SGD;Acc:S000004430]
YHR140W	50.0801	-0.158994	0.189571	-0.841471	0.400084	0.529798	YHR140W	Putative integral membrane protein of unknown function [Source:SGD;Acc:S000001182]
YBR294W	10.7498	0.34174	0.18947	1.63533	0.10198	0.180198	SUL1	High affinity sulfate permease of the SulP anion transporter family; sulfate uptake is mediated by specific sulfate transporters Sul1p and Sul2p, which control the concentration of endogenous activated sulfate intermediates [Source:SGD;Acc:S000000498]
YER058W	131.769	-0.591524	0.189462	-3.26232	0.00110503	0.00383412	PET117	Protein required for assembly of cytochrome c oxidase [Source:SGD;Acc:S000000860]
YGL146C	54.742	-0.187129	0.189412	-1.00441	0.31518	0.443295	RRT6	Putative protein of unknown function; non-essential gene identified in a screen for mutants with increased levels of rDNA transcription; contains two putative transmembrane spans, but no significant homology to other known proteins [Source:SGD;Acc:S000003114]
YGL188C-A	103.126	0.283174	0.189393	1.40003	0.161505	0.263686	YGL188C-A	Putative protein of unknown function [Source:SGD;Acc:S000028635]
YLR218C	85.2091	-0.48243	0.18937	-2.62438	0.00868067	0.0227177	COA4	Twin Cx(9)C protein involved in cytochrome c oxidase organization; organization includes assembly or stability; localizes to the mitochondrial intermembrane space via the Mia40p-Erv1p system; interacts genetically with CYC1 and with cytochrome c oxidase assembly factors [Source:SGD;Acc:S000004208]
YOR103C	767.273	0.259563	0.18928	1.34697	0.17799	0.28311	OST2	Epsilon subunit of the oligosaccharyltransferase complex; located in the ER lumen; catalyzes asparagine-linked glycosylation of newly synthesized proteins [Source:SGD;Acc:S000005629]
YOR376W-A	64.3299	0.329346	0.189177	1.71226	0.0868479	0.157755	YOR376W-A	Putative protein of unknown function; identified by fungal homology and RT-PCR [Source:SGD;Acc:S000028586]
YFR026C	38.121	0.396621	0.189133	2.08102	0.0374323	0.078298	ULI1	Protein of unknown function; involved in and induced by the endoplasmic reticulum unfolded protein response (UPR); SWAT-GFP and mCherry fusion proteins localize to the endoplasmic reticulum [Source:SGD;Acc:S000001922]
YNL259C	175.948	-0.00911445	0.189051	-0.0424167	0.966166	0.977033	ATX1	Cytosolic copper metallochaperone; transports copper to the secretory vesicle copper transporter Ccc2p for eventual insertion into Fet3p, which is a multicopper oxidase required for high-affinity iron uptake; human homolog ATOX1 can complement yeast atx1 mutant; overexpression of human ATOX1 suppresses lysine auxotrophy of the yeast sod1 null mutant, as does overexpression of yeast ATX1 [Source:S…
YDR155C	4804.67	0.0237335	0.189027	0.0996021	0.92066	0.949913	CPR1	Cytoplasmic peptidyl-prolyl cis-trans isomerase (cyclophilin); catalyzes the cis-trans isomerization of peptide bonds N-terminal to proline residues; binds the drug cyclosporin A; N-terminally propionylated in vivo; protein abundance increases in response to DNA replication stress [Source:SGD;Acc:S000002562]
YPL025C	9.81783	0.0475793	0.188932	0.156381	0.875733	0.920023	YPL025C	Dubious open reading frame; unlikely to encode a functional protein, based on available experimental and comparative sequence data [Source:SGD;Acc:S000005946]
YGL024W	8.12186	0.638771	0.1889	2.78478	0.00535642	0.0149571	YGL024W	Dubious open reading frame; unlikely to encode a functional protein, based on available experimental and comparative sequence data; partially/completely overlaps the verified ORF PGD1/YGL025C [Source:SGD;Acc:S000002992]
RUF20	38.6629	0.228085	0.188885	1.19809	0.230883	0.346903	RUF20	RNA of Unknown Function [Source:SGD;Acc:S000130127]
tD(GUC)N	56.7246	0.0702827	0.188873	0.405615	0.685025	0.783918	tD(GUC)N	Aspartate tRNA (tRNA-Asp), predicted by tRNAscan-SE analysis [Source:SGD;Acc:S000006544]
YDR218C	7.82358	0.136421	0.18882	0.631228	0.527892	0.649246	SPR28	Sporulation-specific homolog of the CDC3/10/11/12 family of genes; meiotic septin expressed at high levels during meiotic divisions and ascospore formation; the yeast CDC3/10/11/12 family is a family of bud neck microfilament genes [Source:SGD;Acc:S000002626]
YPL061W	8436.25	0.569603	0.1888	2.88881	0.00386704	0.0112838	ALD6	Cytosolic aldehyde dehydrogenase; activated by Mg2+ and utilizes NADP+ as the preferred coenzyme; required for conversion of acetaldehyde to acetate; constitutively expressed; locates to the mitochondrial outer surface upon oxidative stress [Source:SGD;Acc:S000005982]
YLR066W	1035.97	0.595232	0.188748	3.06802	0.0021548	0.00688751	SPC3	Subunit of signal peptidase complex; complex catalyzes cleavage of N-terminal signal sequences of proteins targeted to the secretory pathway; homologous to mammalian SPC22/23; other members of the complex are Spc1p, Spc2p, and Sec11p [Source:SGD;Acc:S000004056]
YJR011C	146.507	0.190211	0.188711	0.956657	0.33874	0.468167	YJR011C	Putative protein of unknown function; GFP-fusion protein expression is induced in response to the DNA-damaging agent MMS [Source:SGD;Acc:S000003772]
YDR259C	92.0231	0.938543	0.18868	4.84538	1.26369e-06	8.92666e-06	YAP6	Basic leucine zipper (bZIP) transcription factor; physically interacts with the Tup1-Cyc8 complex and recruits Tup1p to its targets; overexpression increases sodium and lithium tolerance; computational analysis suggests a role in regulation of expression of genes involved in carbohydrate metabolism; YAP6 has a paralog, CIN5, that arose from the whole genome duplication [Source:SGD;Acc:S000002667]
YOR050C	10.6662	0.115658	0.188672	0.575823	0.564735	0.682496	YOR050C	Dubious open reading frame; unlikely to encode a functional protein, based on available experimental and comparative sequence data; null mutant is viable [Source:SGD;Acc:S000005576]
YGL170C	10.3892	-0.46945	0.188645	-2.46947	0.0135315	0.0331131	SPO74	Component of the meiotic outer plaque of the spindle pole body; involved in modifying the meiotic outer plaque that is required prior to prospore membrane formation [Source:SGD;Acc:S000003138]
YIL101C	82.4322	0.897233	0.188501	4.64625	3.38029e-06	2.1911e-05	XBP1	Transcriptional repressor; binds promoter sequences of cyclin genes, CYS3, and SMF2; not expressed during log phase of growth, but induced by stress or starvation during mitosis, and late in meiosis; represses 15% of all yeast genes as cells transition to quiescence; important for maintaining G1 arrest and for longevity of quiescent cells; member of Swi4p/Mbp1p family; phosphorylated by Cdc28p; r…
YGR038C-B	47.7557	-0.119368	0.188372	-0.604673	0.545396	0.665172	YGR038C-B	Retrotransposon TYA Gag and TYB Pol genes; transcribed/translated as one unit; polyprotein is processed to make a nucleocapsid-like protein (Gag), reverse transcriptase (RT), protease (PR), and integrase (IN); similar to retroviral genes [Source:SGD;Acc:S000007408]
YHR124W	45.9631	1.16226	0.188346	5.85148	4.87213e-09	5.12796e-08	NDT80	Meiosis-specific transcription factor; required for exit from pachytene and for full meiotic recombination; activates middle sporulation genes; competes with Sum1p for binding to promoters containing middle sporulation elements (MSE) [Source:SGD;Acc:S000001166]
YPR059C	9.815	0.0418969	0.188303	0.305063	0.760318	0.842953	YPR059C	Dubious open reading frame; unlikely to encode a functional protein, based on available experimental and comparative sequence data; partially overlaps the verified gene YMC1/YPR058W [Source:SGD;Acc:S000006263]
YOL038C-A	10.9119	0.662433	0.188202	3.51174	0.000445176	0.00171477	YOL038C-A	Putative protein of unknown function; identified by SAGE analysis [Source:SGD;Acc:S000028812]
YNR068C	69.9545	0.496862	0.188175	2.58016	0.00987544	0.0252667	YNR068C	Putative protein of unknown function; exhibits homology to C-terminal end of Bul1p; expressed as a readthrough product of BSC5, the readthrough locus being termed BUL3; the BUL3 readthrough product is involved in ubiquitin-mediated sorting of plasma membrane proteins and interacts with WW domains of Rsp5p in vitro, but in a functionally different way than the non-readthrough form [Source:SGD;Acc:…
YDL041W	8.47259	0.133285	0.188169	0.72375	0.469219	0.596499	YDL041W	Dubious open reading frame; unlikely to encode a functional protein, based on available experimental and comparative sequence data; overlaps the verified gene SIR2/YDL042C [Source:SGD;Acc:S000002199]
YGR269W	43.0413	0.173607	0.188159	0.918524	0.358344	0.488549	YGR269W	Dubious open reading frame; unlikely to encode a functional protein, based on available experimental and comparative sequence data; partially overlaps the uncharacterized ORF HUA1/YGR268C [Source:SGD;Acc:S000003501]
YNL109W	11.4693	-0.0585247	0.188126	-0.249892	0.802671	0.872037	YNL109W	Dubious open reading frame; unlikely to encode a functional protein, based on available experimental and comparative sequence data; partially overlaps the uncharacterized ORF YNL108C [Source:SGD;Acc:S000005053]
YLR461W	82.5751	-0.0270038	0.188064	-0.163563	0.870075	0.916837	PAU4	Member of the seripauperin multigene family; encoded mainly in subtelomeric regions; SWAT-GFP fusion protein localizes to the endoplasmic reticulum and vacuole, while mCherry fusion localizes to just the vacuole; active during alcoholic fermentation; regulated by anaerobiosis; negatively regulated by oxygen; repressed by heme [Source:SGD;Acc:S000004453]
YIL156W-B	71.175	0.311569	0.188064	1.61424	0.106475	0.186828	YIL156W-B	Putative protein of unknown function; originally identified based on homology to Ashbya gossypii and other related yeasts; SWAT-GFP and mCherry fusion proteins localize to the vacuole, while SWAT-GFP fusion also localizes to the endoplasmic reticulum [Source:SGD;Acc:S000028511]
YMR159C	74.542	0.343002	0.187971	1.82765	0.0676022	0.128585	ATG16	Conserved protein involved in autophagy; interacts with Atg12p-Atg5p conjugates to form Atg12p-Atg5p-Atg16p multimers, which binds to membranes and localizes to the pre-autophagosomal structure and are required for autophagy; relocalizes from nucleus to cytoplasmic foci upon DNA replication stress [Source:SGD;Acc:S000004769]
YER190W	8.12473	0.0400631	0.187911	0.272713	0.785074	0.858453	YRF1-2	Helicase encoded by the Y' element of subtelomeric regions; highly expressed in the mutants lacking the telomerase component TLC1; potentially phosphorylated by Cdc28p; induced by treatment with 8-methoxypsoralen and UVA irradiation [Source:SGD;Acc:S000000992]
YOL103W-B	61.0174	0.240525	0.187786	1.2333	0.217465	0.331931	YOL103W-B	Retrotransposon TYA Gag and TYB Pol genes; transcribed/translated as one unit; polyprotein is processed to make a nucleocapsid-like protein (Gag), reverse transcriptase (RT), protease (PR), and integrase (IN); similar to retroviral genes [Source:SGD;Acc:S000007350]
YLR385C	61.6481	-0.354218	0.187747	-1.91187	0.0558934	0.109936	SWC7	Protein of unknown function; component of the Swr1p complex that incorporates Htz1p into chromatin [Source:SGD;Acc:S000004377]
YEL041W	79.1985	0.929011	0.187733	4.8604	1.17149e-06	8.32209e-06	YEF1	ATP-NADH kinase; phosphorylates both NAD and NADH; homooctameric structure consisting of 60-kDa subunits; similar to Pos5p; overexpression complements certain pos5 phenotypes; YEF1 has a paralog, UTR1, that arose from the whole genome duplication [Source:SGD;Acc:S000000767]
YOL097W-A	41.0666	0.434194	0.187706	2.26118	0.0237478	0.0532296	YOL097W-A	Putative protein of unknown function; identified by expression profiling and mass spectrometry [Source:SGD;Acc:S000028854]
YLR307W	8.72206	-0.31916	0.187608	-1.9021	0.0571575	0.112002	CDA1	Chitin deacetylase; together with Cda2p involved in the biosynthesis ascospore wall component, chitosan; required for proper rigidity of the ascospore wall [Source:SGD;Acc:S000004298]
YER011W	166.491	-1.94179	0.187512	-10.7336	7.07564e-27	7.18292e-25	TIR1	Cell wall mannoprotein; expression is downregulated at acidic pH and induced by cold shock and anaerobiosis; abundance is increased in cells cultured without shaking; member of the Srp1p/Tip1p family of serine-alanine-rich proteins [Source:SGD;Acc:S000000813]
YER121W	8.56157	0.0163041	0.187478	0.11868	0.905529	0.93972	YER121W	Putative protein of unknown function; may be involved in phosphatase regulation and/or generation of precursor metabolites and energy [Source:SGD;Acc:S000000923]
YGL062W	1943.23	0.172773	0.187335	0.856997	0.391447	0.521653	PYC1	Pyruvate carboxylase isoform; cytoplasmic enzyme that converts pyruvate to oxaloacetate; differentially regulated than isoform Pyc2p; mutations in the human homolog are associated with lactic acidosis; PYC1 has a paralog, PYC2, that arose from the whole genome duplication [Source:SGD;Acc:S000003030]
YER185W	94.3395	-0.388936	0.187232	-2.12402	0.0336685	0.0717607	PUG1	Plasma membrane protein involved in protoprophyrin and heme transport; roles in the uptake of protoprophyrin IX and the efflux of heme; expression is induced under both low-heme and low-oxygen conditions; member of the fungal lipid-translocating exporter (LTE) family of proteins [Source:SGD;Acc:S000000987]
YCL037C	101.793	-0.0271491	0.187184	-0.167205	0.867209	0.91504	SRO9	Cytoplasmic RNA-binding protein; shuttles between nucleus and cytoplasm and is exported from the nucleus in an mRNA export-dependent manner; associates with translating ribosomes; involved in heme regulation of Hap1p as a component of the HMC complex, also involved in the organization of actin filaments; contains a La motif; SRO9 has a paralog, SLF1, that arose from the whole genome duplication […
YOR379C	55.8563	0.0871517	0.187172	0.453516	0.650177	0.75426	YOR379C	Dubious open reading frame; unlikely to encode a functional protein, based on available experimental and comparative sequence data; partially overlaps the uncharacterized ORF YOR378W [Source:SGD;Acc:S000005906]
YER106W	7.52447	0.0291569	0.187141	0.0939697	0.925133	0.952503	MAM1	Monopolin; meiosis-specific kinetochore-associated protein involved in monopolar attachment of sister kinetochores to the meiotic spindle; subunit of monopolin, a complex that prevents biorientation of sister kinetochores to ensure homolog biorientation during meiosis I; regulates the conformation, enzyme kinetics and substrate specificity of the Dsn1p kinase, Hrr1p; expressed only during the fir…
YKL169C	8.96546	0.120009	0.187109	0.706908	0.479624	0.606053	YKL169C	Dubious open reading frame; unlikely to encode a functional protein, based on available experimental and comparative sequence data; partially overlaps the verified gene MRPL38 [Source:SGD;Acc:S000001652]
YDR216W	320.709	0.634188	0.187108	3.38686	0.000706987	0.00257958	ADR1	Carbon source-responsive zinc-finger transcription factor; required for transcription of the glucose-repressed gene ADH2, of peroxisomal protein genes, and of genes required for ethanol, glycerol, and fatty acid utilization [Source:SGD;Acc:S000002624]
snR57	60.103	0.132093	0.186999	0.59768	0.550054	0.669251	snR57	C/D box small nucleolar RNA (snoRNA); guides 2'-O-methylation of small subunit (SSU) rRNA at position G1572 [Source:SGD;Acc:S000006448]
YJL218W	71.604	0.563605	0.186978	2.99922	0.00270673	0.008305	YJL218W	Putative acetyltransferase; similar to bacterial galactoside O-acetyltransferases; induced by oleate in an OAF1/PIP2-dependent manner; promoter contains an oleate response element consensus sequence; non-essential gene [Source:SGD;Acc:S000003754]
YGL175C	86.8108	-0.432719	0.186862	-2.38261	0.0171902	0.0405681	SAE2	Endonuclease required for telomere elongation; required for telomeric 5' C-rich strand resection; involved in ds-break repair and processing hairpin DNA structures with the MRX complex; function requires sumoylation and phosphorylation; exists as inactive oligomers that are transiently released into smaller active units by phosphorylation; DNA damage triggers Sae2p removal, so active Sae2p is pre…
snR69	11.1199	0.0527428	0.18685	0.353849	0.723452	0.81573	snR69	C/D box small nucleolar RNA (snoRNA); guides 2'-O-methylation of large subunit (LSU) rRNA at position C2948 [Source:SGD;Acc:S000006460]
YCR095W-A	37.9776	0.142735	0.1868	0.744055	0.456843	0.585496	YCR095W-A	Putative protein of unknown function [Source:SGD;Acc:S000029724]
YPR137C-B	8.45526	-0.022093	0.186791	-0.202768	0.839316	0.8978	YPR137C-B	Retrotransposon TYA Gag and TYB Pol genes; transcribed/translated as one unit; polyprotein is processed to make a nucleocapsid-like protein (Gag), reverse transcriptase (RT), protease (PR), and integrase (IN); similar to retroviral genes [Source:SGD;Acc:S000007360]
YNR034W-A	83.689	1.47752	0.186728	7.35104	1.96675e-13	4.11253e-12	EGO4	Protein of unknown function; expression is regulated by Msn2p/Msn4p; YNR034W-A has a paralog, YCR075W-A, that arose from the whole genome duplication [Source:SGD;Acc:S000007525]
YDR261W-B	328.164	0.208534	0.186657	0.989487	0.322425	0.451263	YDR261W-B	Retrotransposon TYA Gag and TYB Pol genes; transcribed/translated as one unit; polyprotein is processed to make a nucleocapsid-like protein (Gag), reverse transcriptase (RT), protease (PR), and integrase (IN); similar to retroviral genes [Source:SGD;Acc:S000007397]
YNL279W	59.368	-0.0200566	0.186652	-0.10709	0.914718	0.946082	PRM1	Pheromone-regulated multispanning membrane protein; involved in membrane fusion during mating; predicted to have 5 transmembrane segments and a coiled coil domain; localizes to the shmoo tip; regulated by Ste12p [Source:SGD;Acc:S000005223]
YMR007W	7.42109	0.274737	0.186646	1.43467	0.151381	0.249844	YMR007W	Putative protein of unknown function; conserved among S. cerevisiae strains; YMR007W is not an essential gene [Source:SGD;Acc:S000004609]
YGR016W	103.401	0.450568	0.186578	2.33198	0.0197016	0.0454552	YGR016W	Putative protein of unknown function [Source:SGD;Acc:S000003248]
YML003W	103.994	0.365537	0.186371	1.92441	0.0543036	0.107615	YML003W	Putative protein of unknown function [Source:SGD;Acc:S000004462]
YKL153W	11.0924	-0.200932	0.186328	-0.887236	0.374952	0.503939	YKL153W	Dubious open reading frame; unlikely to encode a functional protein, based on available experimental and comparative sequence data; transcription of both YLK153W and the overlapping essential gene GPM1 is reduced in the gcr1 null mutant [Source:SGD;Acc:S000001636]
YIL121W	106.921	-0.34106	0.186251	-1.62176	0.104856	0.184553	QDR2	Plasma membrane transporter of the major facilitator superfamily; member of the 12-spanner drug:H(+) antiporter DHA1 family; exports copper; has broad substrate specificity and can transport many mono- and divalent cations; transports a variety of drugs and is required for resistance to quinidine, barban, cisplatin, and bleomycin; contributes to potassium homeostasis; expression is regulated by c…
YJL038C	9.00328	-0.0294475	0.18625	-0.126005	0.899728	0.934778	LOH1	Protein involved in outer spore wall assembly; likely involved directly in dityrosine layer assembly; induced during sporulation; repressed during vegetative growth by Sum1p and Hst1p; sequence similar to adjacent ORF, IRC18/YJL037W, and the irc18 loh1 double mutant exhibits reduced dityrosine fluorescence relative to the single mutants; SWAT-GFP and mCherry fusion proteins localize to the cytoso…
YDL085W	13.857	0.265882	0.186196	1.11282	0.265786	0.38687	NDE2	Mitochondrial external NADH dehydrogenase; catalyzes the oxidation of cytosolic NADH; Nde1p and Nde2p are involved in providing the cytosolic NADH to the mitochondrial respiratory chain; NDE2 has a paralog, NDE1, that arose from the whole genome duplication [Source:SGD;Acc:S000002243]
YNR014W	137.258	-0.148078	0.18619	-0.886741	0.375219	0.50419	YNR014W	Putative protein of unknown function; expression is cell-cycle regulated, Azf1p-dependent, and heat-inducible; YNR014W has a paralog, YMR206W, that arose from the whole genome duplication [Source:SGD;Acc:S000005297]
YDR042C	40.0475	-0.0664598	0.186189	-0.362564	0.716931	0.810847	YDR042C	Putative protein of unknown function; expression is increased in ssu72-ts69 mutant [Source:SGD;Acc:S000002449]
YGR050C	79.1622	0.561962	0.186159	2.93604	0.00332427	0.00988889	YGR050C	Protein of unknown function; mRNA identified as translated by ribosome profiling data [Source:SGD;Acc:S000003282]
YBR047W	77.052	0.356707	0.186102	1.95494	0.0505903	0.101309	FMP23	Putative protein of unknown function; proposed to be involved in iron or copper homeostasis; the authentic, non-tagged protein is detected in highly purified mitochondria in high-throughput studies [Source:SGD;Acc:S000000251]
YNL114C	8.53975	-0.108565	0.186075	-0.524456	0.599962	0.712483	YNL114C	Dubious open reading frame; unlikely to encode a functional protein, based on available experimental and comparative sequence data; completely overlaps the verified ORF RPC19/YNL113W, an RNA polymerase subunit [Source:SGD;Acc:S000005058]
YJL043W	10.2564	-0.0235919	0.186026	-0.281445	0.778369	0.853691	YJL043W	Putative protein of unknown function; YJL043W is a non-essential gene [Source:SGD;Acc:S000003579]
YHR049C-A	11.3445	-0.321467	0.185992	-1.79859	0.0720842	0.135967	YHR049C-A	Dubious open reading frame; unlikely to encode a functional protein, based on available experimental and comparative sequence data [Source:SGD;Acc:S000003532]
YER138C	7.09751	0.106694	0.185876	0.635381	0.52518	0.647499	YER138C	Retrotransposon TYA Gag and TYB Pol genes; transcribed/translated as one unit; polyprotein is processed to make a nucleocapsid-like protein (Gag), reverse transcriptase (RT), protease (PR), and integrase (IN); similar to retroviral genes [Source:SGD;Acc:S000000940]
YJR079W	9.1023	0.0326267	0.185815	0.120381	0.904182	0.938786	YJR079W	Putative protein of unknown function; mutation results in impaired mitochondrial respiration [Source:SGD;Acc:S000003840]
YOR298W	44.7014	0.282882	0.185813	1.48389	0.137839	0.230796	MUM3	Protein of unknown function involved in outer spore wall organization; has similarity to the tafazzins superfamily of acyltransferases [Source:SGD;Acc:S000005824]
YNL203C	59.9475	-0.0209571	0.185777	-0.114495	0.908845	0.941764	YNL203C	Dubious open reading frame; unlikely to encode a functional protein, based on available experimental and comparative sequence data [Source:SGD;Acc:S000005147]
YMR107W	20.8161	1.81806	0.18575	6.96555	3.27121e-12	5.78343e-11	SPG4	Protein required for high temperature survival during stationary phase; not required for growth on nonfermentable carbon sources [Source:SGD;Acc:S000004713]
YOR008W-B	59.4322	0.0692962	0.185719	0.372766	0.709322	0.805135	YOR008W-B	Dubious open reading frame; unlikely to encode a functional protein, based on available experimental and comparative sequence data [Source:SGD;Acc:S000007628]
YBR296C	56.1055	0.964953	0.185649	4.98016	6.35333e-07	4.69892e-06	PHO89	Plasma membrane Na+/Pi cotransporter; active in early growth phase; similar to phosphate transporters of Neurospora crassa; transcription regulated by inorganic phosphate concentrations and Pho4p; mutations in related human transporter genes hPit1 and hPit2 are associated with hyperphosphatemia-induced calcification of vascular tissue and familial idiopathic basal ganglia calcification [Source:SG…
YML133C	56.2008	-0.609538	0.185612	-3.34486	0.000823235	0.00294903	YML133C	Putative Y' element ATP-dependent helicase; the authentic, non-tagged protein is detected in highly purified mitochondria in high-throughput studies; YML133C contains an intron [Source:SGD;Acc:S000004602]
YEL059W	7.03361	0.560334	0.185507	2.85492	0.00430474	0.0123717	HHY1	Dubious open reading frame unlikely to encode a functional protein; mutant is hypersensitive to hygromycin B indicative of defects in vacuolar trafficking [Source:SGD;Acc:S000000785]
YKR035C	8.5622	-0.0683094	0.185465	-0.375581	0.707228	0.803338	OPI8	Dubious open reading frame; unlikely to encode a functional protein, based on available experimental and comparative sequence data; partially overlaps verified gene DID2/YKR035W-A [Source:SGD;Acc:S000001743]
YNL146W	56.8948	0.270978	0.185378	1.3744	0.169317	0.272762	YNL146W	Putative protein of unknown function; green fluorescent protein (GFP)-fusion protein localizes to the endoplasmic reticulum; YNL146W is not an essential gene [Source:SGD;Acc:S000005090]
YPL081W	4997.4	0.547901	0.185261	2.91508	0.00355601	0.0105078	RPS9A	Protein component of the small (40S) ribosomal subunit; homologous to mammalian ribosomal protein S9 and bacterial S4; RPS9A has a paralog, RPS9B, that arose from the whole genome duplication [Source:SGD;Acc:S000006002]
YDR014W-A	9.54535	0.187887	0.185257	1.22077	0.222175	0.3372	HED1	Meiosis-specific protein; down-regulates Rad51p-mediated mitotic recombination when the meiotic recombination machinery is impaired; promotes synapsis and required for the normal morphogenesis of synaptonemal complex; prevents the recruitment of Rad54p to site-specific DNA double-strand breaks in vivo; early meiotic gene, transcribed specifically during meiotic prophase [Source:SGD;Acc:S000113613]
YKL031W	8.06208	-0.024871	0.185075	-0.147767	0.882526	0.924691	YKL031W	Dubious open reading frame; unlikely to encode a functional protein, based on available experimental and comparative sequence data; not conserved in closely related Saccharomyces species [Source:SGD;Acc:S000001514]
YLR194C	4015.14	0.438898	0.184959	2.33035	0.0197875	0.0456032	NCW2	Structural constituent of the cell wall; attached to the plasma membrane by a GPI-anchor; expression is upregulated in response to cell wall stress; null mutant is sensitive to the antifungal agent polyhexamethylene biguanide, resistant to zymolyase treatment and has increased chitin deposition [Source:SGD;Acc:S000004184]
YKL102C	8.03896	0.11173	0.184912	0.664143	0.506599	0.631893	YKL102C	Putative protein of unknown function; conserved across S. cerevisiae strains; deletion confers sensitivity to citric acid; predicted protein would include a thiol-disulfide oxidoreductase active site [Source:SGD;Acc:S000001585]
YLR255C	7.44066	0.10201	0.184911	0.591038	0.554495	0.673613	YLR255C	Putative protein of unknown function; conserved across S. cerevisiae strains [Source:SGD;Acc:S000004245]
YOR032W-A	9.005	-0.0938679	0.184891	-0.490842	0.623538	0.731783	YOR032W-A	Protein of unknown function; SWAT-GFP and seamless-GFP fusion proteins localize to the endoplasmic reticulum; identified by gene-trapping, microarray-based expression analysis, and genome-wide homology searching [Source:SGD;Acc:S000028710]
YPL185W	9.96144	0.237373	0.184674	1.16585	0.243673	0.361739	YPL185W	Dubious open reading frame; unlikely to encode a functional protein, based on available experimental and comparative sequence data; partially overlaps the verified gene UIP4/YPL186C [Source:SGD;Acc:S000006106]
YJL052W	3617.45	-0.464836	0.184664	-2.81353	0.00490001	0.0138672	TDH1	Glyceraldehyde-3-phosphate dehydrogenase (GAPDH), isozyme 1; involved in glycolysis and gluconeogenesis; tetramer that catalyzes the reaction of glyceraldehyde-3-phosphate to 1,3 bis-phosphoglycerate; detected in the cytoplasm and cell wall; protein abundance increases in response to DNA replication stress; GAPDH-derived antimicrobial peptides secreted by S. cerevisiae are active against a wide v…
snR190	10.4697	0.465592	0.184662	2.16315	0.0305293	0.0661907	snR190	C/D box small nucleolar RNA (snoRNA); predicted to guide 2'-O-methylation of large subunit (LSU) rRNA at position G2395; not shown to be active [Source:SGD;Acc:S000006509]
YFL011W	7.55465	0.00093728	0.184576	-0.292694	0.769756	0.848998	HXT10	Putative hexose transporter; expressed at low levels and expression is repressed by glucose [Source:SGD;Acc:S000001883]
YKL070W	8.8186	-0.0784375	0.184521	-0.481706	0.630015	0.737625	YKL070W	Putative protein of unknown function; expression induced in cells treated with mycotoxins patulin or citrinin; the authentic, non-tagged protein is detected in highly purified mitochondria in high-throughput studies [Source:SGD;Acc:S000001553]
YBR056W-A	1481.15	0.772344	0.184504	3.99221	6.54612e-05	0.000312842	YBR056W-A	Protein of unknown function; mRNA identified as translated by ribosome profiling data; partially overlaps dubious ORF YBR056C-B; YBR056W-A has a paralog, YDR034W-B, that arose from the whole genome duplication [Source:SGD;Acc:S000028736]
YGL096W	92.9299	1.27664	0.184504	6.64627	3.00604e-11	4.67161e-10	TOS8	Homeodomain-containing protein and putative transcription factor; found associated with chromatin; target of SBF transcription factor; induced during meiosis and under cell-damaging conditions; TOS8 has a paralog, CUP9, that arose from the whole genome duplication [Source:SGD;Acc:S000003064]
YOR034C-A	8.18632	0.0473121	0.184491	0.283978	0.776427	0.852702	YOR034C-A	Putative protein of unknown function; identified by expression profiling and mass spectrometry [Source:SGD;Acc:S000028856]
snR82	43.6988	-0.352032	0.184366	-1.91837	0.0550639	0.10878	snR82	H/ACA box small nucleolar RNA (snoRNA); guides pseudouridylation of large subunit (LSU) rRNA at positions U1110, U2349, and U2351 [Source:SGD;Acc:S000028467]
YMR156C	62.6522	0.214365	0.184363	1.15858	0.246626	0.364985	TPP1	DNA 3'-phosphatase; functions in repair of endogenous damage of double-stranded DNA, activity is specific for removal of 3' phosphates at strand breaks; similar to the l-2-haloacid dehalogenase superfamily; homolog of human polynucleotide kinase/3'-phosphatase [Source:SGD;Acc:S000004765]
YPR158W-B	42.0845	0.327118	0.184266	1.76054	0.0783162	0.145233	YPR158W-B	Retrotransposon TYA Gag and TYB Pol genes; transcribed/translated as one unit; polyprotein is processed to make a nucleocapsid-like protein (Gag), reverse transcriptase (RT), protease (PR), and integrase (IN); similar to retroviral genes [Source:SGD;Acc:S000007364]
YCR075W-A	83.806	0.170306	0.184247	0.928081	0.353365	0.483181	EGO2	Component of the EGO and GSE complexes; identified by homology to Ashbya gossypii; YCR075W-A has a paralog, YNR034W-A, that arose from the whole genome duplication [Source:SGD;Acc:S000028519]
YOR027W	2645.52	-0.000390097	0.184226	-0.00690212	0.994493	0.996234	STI1	Hsp90 cochaperone; regulates spatial organization of amyloid-like proteins in the cytosol, thereby buffering the proteotoxicity caused by amyloid-like proteins; interacts with the Ssa group of the cytosolic Hsp70 chaperones and activates Ssa1p ATPase activity; interacts with Hsp90 chaperones and inhibits their ATPase activity; homolog of mammalian Hop [Source:SGD;Acc:S000005553]
YGR066C	9.77474	-0.06272	0.184223	-0.33482	0.737761	0.825958	YGR066C	Putative protein of unknown function [Source:SGD;Acc:S000003298]
YAR020C	41.9019	0.341972	0.184184	1.89463	0.0581411	0.11354	PAU7	Member of the seripauperin multigene family; active during alcoholic fermentation, regulated by anaerobiosis, inhibited by oxygen, repressed by heme [Source:SGD;Acc:S000000073]
YLR149C	90.4847	0.0838472	0.18415	0.409599	0.6821	0.781798	YLR149C	Protein of unknown function; overexpression causes a cell cycle delay or arrest; null mutation results in a decrease in plasma membrane electron transport; YLR149C is not an essential gene; protein abundance increases in response to DNA replication stress [Source:SGD;Acc:S000004139]
YIR043C	57.8718	0.675815	0.184148	3.58778	0.000333509	0.00132269	NA	NA
YJL199C	51.2925	0.379059	0.184136	2.01675	0.043722	0.0893463	MBB1	Putative protein of unknown function; conserved among S. cerevisiae strains, not conserved in closely related Saccharomyces species; protein detected in large-scale protein-protein interaction studies; YJL199C is not an essential gene [Source:SGD;Acc:S000003735]
snR78	9.24703	0.427081	0.184046	1.75498	0.0792627	0.146428	snR78	C/D box small nucleolar RNA (snoRNA); guides 2'-O-methylation of large subunit (LSU) rRNA at position U2421 [Source:SGD;Acc:S000007312]
YOR146W	16.5611	0.315704	0.183923	1.52414	0.127474	0.217372	YOR146W	Dubious open reading frame; unlikely to encode a functional protein, based on available experimental and comparative sequence data; open reading frame overlaps the verified gene PNO1/YOR145C [Source:SGD;Acc:S000005672]
YGL199C	8.94215	-0.00380139	0.183921	0.13501	0.892604	0.930911	YGL199C	Dubious open reading frame; unlikely to encode a functional protein, based on available experimental and comparative sequence data; partially overlaps the verified ORF YIP4/YGL198W [Source:SGD;Acc:S000003167]
YJR097W	174.288	0.222294	0.183806	1.19081	0.233726	0.350256	JJJ3	Protein of unknown function; contains a CSL Zn finger and a DnaJ-domain; involved in diphthamide biosynthesis; ortholog human Dph4 [Source:SGD;Acc:S000003858]
YKR047W	53.4678	-0.415307	0.183787	-2.31587	0.0205651	0.047085	YKR047W	Dubious open reading frame; unlikely to encode a functional protein, based on available experimental and comparative sequence data; partially overlaps the verified gene NAP1 [Source:SGD;Acc:S000001755]
YBR045C	86.8235	-0.407991	0.183772	-2.26481	0.0235243	0.052785	GIP1	Meiosis-specific regulatory subunit of the Glc7p protein phosphatase; regulates spore wall formation and septin organization, required for expression of some late meiotic genes and for normal localization of Glc7p [Source:SGD;Acc:S000000249]
YGR146C-A	9.57732	-0.166316	0.183734	-0.881499	0.378048	0.507558	YGR146C-A	Putative protein of unknown function [Source:SGD;Acc:S000028638]
YLR364W	93.2098	0.34104	0.183665	1.83967	0.0658164	0.125911	GRX8	Glutaredoxin that employs a dithiol mechanism of catalysis; monomeric; activity is low and null mutation does not affect sensitivity to oxidative stress; GFP-fusion protein localizes to the cytoplasm; expression strongly induced by arsenic [Source:SGD;Acc:S000004356]
YKR097W	162.605	0.97378	0.183638	5.05448	4.31555e-07	3.28044e-06	PCK1	Phosphoenolpyruvate carboxykinase; key enzyme in gluconeogenesis, catalyzes early reaction in carbohydrate biosynthesis, glucose represses transcription and accelerates mRNA degradation, regulated by Mcm1p and Cat8p, located in the cytosol [Source:SGD;Acc:S000001805]
YHR193C-A	8.2354	-0.197133	0.183594	-1.19719	0.231231	0.34716	YHR193C-A	Dubious open reading frame; unlikely to encode a functional protein, based on available experimental and comparative sequence data; completely overlaps verified ORF MDM31/YHR194W [Source:SGD;Acc:S000028785]
YJL022W	11.1477	0.247352	0.183568	1.1188	0.263224	0.38395	YJL022W	Dubious open reading frame; unlikely to encode a functional protein, based on available experimental and comparative sequence data; partially overlaps the verified gene PET130 [Source:SGD;Acc:S000003559]
YOR382W	1325.63	-1.2896	0.183415	-7.74031	9.91778e-15	2.45758e-13	FIT2	Mannoprotein that is incorporated into the cell wall; incorporated via a glycosylphosphatidylinositol (GPI) anchor; involved in the retention of siderophore-iron in the cell wall [Source:SGD;Acc:S000005909]
YPL119C-A	8.07877	-0.101087	0.183368	-0.462556	0.643683	0.749277	YPL119C-A	Putative protein of unknown function; identified by expression profiling and mass spectrometry [Source:SGD;Acc:S000028859]
YJL153C	134.484	1.22678	0.183334	6.55303	5.63817e-11	8.25271e-10	INO1	Inositol-3-phosphate synthase; involved in synthesis of inositol phosphates and inositol-containing phospholipids; transcription is coregulated with other phospholipid biosynthetic genes by Ino2p and Ino4p, which bind the UASINO DNA element [Source:SGD;Acc:S000003689]
YPL156C	175.358	-0.216553	0.183296	-1.28709	0.198065	0.309258	PRM4	Pheromone-regulated protein proposed to be involved in mating; predicted to have 1 transmembrane segment; transcriptionally regulated by Ste12p during mating and by Cat8p during the diauxic shift [Source:SGD;Acc:S000006077]
YIL028W	52.0007	0.45421	0.183188	2.45978	0.0139022	0.0338886	YIL028W	Dubious open reading frame; unlikely to encode a functional protein, based on available experimental and comparative sequence data [Source:SGD;Acc:S000001290]
YCL048W	9.52539	0.0447097	0.18313	0.235633	0.813717	0.880305	SPS22	Protein of unknown function; SPS22 has a paralog, SPS2, that arose from the whole genome duplication; redundant with Sps2p for the organization of the beta-glucan layer of the spore wall [Source:SGD;Acc:S000000553]
YMR169C	142.038	1.40212	0.183117	7.22899	4.86607e-13	9.6921e-12	ALD3	Cytoplasmic aldehyde dehydrogenase; involved in beta-alanine synthesis; uses NAD+ as the preferred coenzyme; very similar to Ald2p; expression is induced by stress and repressed by glucose [Source:SGD;Acc:S000004779]
YJL088W	3078.35	-0.949079	0.183088	-5.21545	1.83372e-07	1.49307e-06	ARG3	Ornithine carbamoyltransferase; also known as carbamoylphosphate:L-ornithine carbamoyltransferase; catalyzes the biosynthesis of the arginine precursor citrulline [Source:SGD;Acc:S000003624]
YML089C	7.70658	0.285218	0.183054	1.74596	0.080818	0.148734	YML089C	Dubious open reading frame; unlikely to encode a functional protein, based on available experimental and comparative sequence data; expression induced by calcium shortage [Source:SGD;Acc:S000004554]
YCL042W	8.02454	-0.0801203	0.183042	-0.476029	0.634053	0.74067	YCL042W	Putative protein of unknown function; epitope-tagged protein localizes to the cytoplasm [Source:SGD;Acc:S000000547]
YPR116W	105.542	-0.0332617	0.183021	-0.296506	0.766844	0.847723	RRG8	Protein of unknown function; required for mitochondrial genome maintenance; null mutation results in a decrease in plasma membrane electron transport [Source:SGD;Acc:S000006320]
YOR313C	135.054	-1.9453	0.183005	-10.7966	3.57122e-27	3.87539e-25	SPS4	Protein whose expression is induced during sporulation; not required for sporulation; heterologous expression in E. coli induces the SOS response that senses DNA damage [Source:SGD;Acc:S000005840]
YDL026W	7.68627	0.00157856	0.183002	-0.0391816	0.968746	0.979012	YDL026W	Dubious open reading frame; unlikely to encode a functional protein, based on available experimental and comparative sequence data [Source:SGD;Acc:S000002184]
YLR237W	2436.93	-0.124369	0.182835	-0.551765	0.581109	0.696762	THI7	Plasma membrane transporter responsible for the uptake of thiamine; contributes to uptake of 5-aminoimidazole-4-carboxamide-1-beta-D-ribofuranoside (acadesine); member of the major facilitator superfamily of transporters; mutation of human ortholog causes thiamine-responsive megaloblastic anemia [Source:SGD;Acc:S000004227]
YLR121C	2348.11	0.55216	0.182778	2.96321	0.00304449	0.00919484	YPS3	Aspartic protease; member of the yapsin family of proteases involved in cell wall growth and maintenance; attached to the plasma membrane via a glycosylphosphatidylinositol (GPI) anchor [Source:SGD;Acc:S000004111]
YOR134W	332.168	1.85452	0.182762	9.68258	3.57585e-22	1.97425e-20	BAG7	Rho GTPase activating protein (RhoGAP); stimulates the intrinsic GTPase activity of Rho1p, which plays a bud growth by regulating actin cytoskeleton organization and cell wall biosynthesis, resulting in the downregulation of Rho1p; structurally and functionally related to Sac7p; BAG7 has a paralog, SAC7, that arose from the whole genome duplication [Source:SGD;Acc:S000005660]
YDL239C	117.118	-0.108518	0.182716	-0.586952	0.557236	0.67577	ADY3	Protein required for spore wall formation; subunit of the leading edge protein (LEP) complex (Ssp1-Ady3-Don1-Irc10) that forms a ring-like structure at the leading edge of the prospore membrane during meiosis II; mediates assembly of the LEP complex, formation of the ring-like structure via interaction with spindle pole body components and prospore membrane maturation; potentially phosphorylated …
YER087C-A	8.64697	-0.0644551	0.182694	-0.296379	0.766941	0.847723	YER087C-A	Dubious open reading frame; unlikely to encode a functional protein, based on available experimental and comparative sequence data; almost completely overlaps ORF AIM10/YER087W [Source:SGD;Acc:S000028753]
YLL024C	53714.2	-0.0543266	0.182657	-0.306911	0.758911	0.842791	SSA2	HSP70 family ATP-binding protein; involved in protein folding, vacuolar import of proteins; required for ubiquitin-dependent degradation of short-lived proteins; associated with chaperonin-containing T-complex; 98% identical to paralog Ssa1p with distinct functional specificity in propagation of yeast [URE3] prions and vacuolar-mediated degradation of gluconeogenesis enzymes; binds tRNA, has role…
snR48	8.01131	-0.0934875	0.1826	-0.577654	0.563498	0.681963	snR48	C/D box small nucleolar RNA (snoRNA); guides 2'-O-methylation of large subunit (LSU) rRNA at positions G2791 and G2793 [Source:SGD;Acc:S000006440]
YDL210W	74.1065	0.442262	0.182566	2.35131	0.0187076	0.0436418	UGA4	GABA (gamma-aminobutyrate) permease; serves as a GABA transport protein involved in the utilization of GABA as a nitrogen source; catalyzes the transport of putrescine and delta-aminolevulinic acid (ALA); localized to the vacuolar membrane [Source:SGD;Acc:S000002369]
YAR050W	85.7774	0.433772	0.182548	2.38662	0.017004	0.0402192	FLO1	Lectin-like protein involved in flocculation; cell wall protein that binds mannose chains on the surface of other cells, confers floc-forming ability that is chymotrypsin sensitive and heat resistant; important for co-flocculation with other yeasts, mediating interaction with specific species; FLO1 has a paralog, FLO5, that arose from a segmental duplication [Source:SGD;Acc:S000000084]
YHL042W	47.4445	0.244792	0.182538	1.29518	0.195259	0.305559	YHL042W	Protein of unknown function; member of the DUP380 subfamily of conserved, often subtelomerically-encoded proteins; SWAT-GFP and mCherry fusion proteins localize to the vacuole [Source:SGD;Acc:S000001034]
YCL001W-A	8.88018	0.0557463	0.182288	0.192846	0.84708	0.901674	YCL001W-A	Putative protein of unknown function; YCL001W-A gene has similarity to DOM34 and is present in a region duplicated between chromosomes XIV and III [Source:SGD;Acc:S000007221]
YLL026W	4747.89	0.268417	0.182259	1.43656	0.150844	0.249287	HSP104	Disaggregase; heat shock protein that cooperates with Ydj1p (Hsp40) and Ssa1p (Hsp70) to refold and reactivate previously denatured, aggregated proteins; responsive to stresses including: heat, ethanol, and sodium arsenite; involved in [PSI+] propagation; protein becomes more abundant and forms cytoplasmic foci in response to DNA replication stress; potentiated Hsp104p variants decrease TDP-43 pr…
YAL016C-A	10.4602	0.275033	0.182166	1.16791	0.242841	0.360822	YAL016C-A	Dubious open reading frame; unlikely to encode a functional protein, based on available experimental and comparative sequence data; partially overlaps ORF TPD3/YAL016W [Source:SGD;Acc:S000028728]
YFL017W-A	115.66	0.341211	0.182115	1.88272	0.0597387	0.116191	SMX2	Core Sm protein Sm G; part of heteroheptameric complex (with Smb1p, Smd1p, Smd2p, Smd3p, Sme1p, and Smx3p) that is part of the spliceosomal U1, U2, U4, and U5 snRNPs; homolog of human Sm G [Source:SGD;Acc:S000002965]
YHR014W	8.22369	0.00720878	0.18211	0.0224786	0.982066	0.987538	SPO13	Meiotic regulator; involved in maintaining sister chromatid cohesion during meiosis I as well as promoting proper attachment of kinetochores to the spindle during meiosis I and meiosis II; anaphase-promoting complex (APC) substrate that is degraded during anaphase I; expressed only in meiotic cells [Source:SGD;Acc:S000001056]
YPR027C	9.86715	-0.487571	0.181985	-2.72117	0.0065051	0.0176251	YPR027C	Putative protein of unknown function; SWAT-GFP and seamless-GFP fusion proteins localize to the endoplasmic reticulum, while the mCherry fusion protein localizes to the vacuole [Source:SGD;Acc:S000006231]
YGL230C	6.68106	0.118835	0.181962	0.631968	0.527408	0.649101	YGL230C	Putative protein of unknown function; non-essential gene [Source:SGD;Acc:S000003199]
YEL049W	8.71681	0.563867	0.18195	2.64905	0.00807192	0.0212839	PAU2	Member of the seripauperin multigene family; encoded mainly in subtelomeric region; active during alcoholic fermentation; regulated by anaerobiosis; negatively regulated by oxygen; repressed by heme [Source:SGD;Acc:S000000775]
YDL184C	7497.2	0.104192	0.181893	0.588296	0.556333	0.675195	RPL41A	Ribosomal 60S subunit protein L41A; comprises only 25 amino acids; rpl41a rpl41b double null mutant is viable; homologous to mammalian ribosomal protein L41, no bacterial homolog; RPL41A has a paralog, RPL41B, that arose from the whole genome duplication [Source:SGD;Acc:S000002343]
YOL091W	54.3637	0.271452	0.181823	1.43571	0.151086	0.249523	SPO21	Component of the meiotic outer plaque of the spindle pole body; involved in modifying the meiotic outer plaque that is required prior to prospore membrane formation; SPO21 has a paralog, YSW1, that arose from the whole genome duplication [Source:SGD;Acc:S000005451]
YEL059C-A	67.9767	0.517411	0.181823	2.76913	0.00562058	0.0155635	SOM1	Subunit of the mitochondrial inner membrane peptidase (IMP); IMP is required for maturation of mitochondrial proteins of the intermembrane space; Som1p facilitates cleavage of a subset of substrates; contains twin cysteine-x9-cysteine motifs [Source:SGD;Acc:S000002954]
YKL093W	76.2719	0.481435	0.181749	2.55606	0.0105864	0.0268348	MBR1	Protein involved in mitochondrial functions and stress response; overexpression suppresses growth defects of hap2, hap3, and hap4 mutants; MBR1 has a paralog, ISF1, that arose from the whole genome duplication [Source:SGD;Acc:S000001576]
YJL047C-A	8.17101	0.337907	0.181699	1.85096	0.0641758	0.123359	YJL047C-A	Putative protein of unknown function [Source:SGD;Acc:S000028804]
YJL089W	44.7731	0.963132	0.181643	4.99704	5.82164e-07	4.3414e-06	SIP4	C6 zinc cluster transcriptional activator; binds to the carbon source-responsive element (CSRE) of gluconeogenic genes; involved in the positive regulation of gluconeogenesis; regulated by Snf1p protein kinase; localized to the nucleus [Source:SGD;Acc:S000003625]
YBL013W	61.9882	-0.761993	0.181579	-4.26371	2.01063e-05	0.000109471	FMT1	Methionyl-tRNA formyltransferase; catalyzes the formylation of initiator Met-tRNA in mitochondria; potential Cdc28p substrate [Source:SGD;Acc:S000000109]
YAR073W	15.1449	-0.412793	0.181464	-2.41285	0.0158281	0.0378567	IMD1	Nonfunctional protein with homology to IMP dehydrogenase; blocked reading frame, located close to the telomere; not expressed at detectable levels; YAR073W and YAR075W comprise a continuous reading frame in most strains of S. cerevisiae; YAR073W/YAR075W together have a paralog, IMD2, that arose from a segmental duplication [Source:SGD;Acc:S000000095]
YER188W	118.399	-0.208964	0.1814	-1.21718	0.223534	0.338936	YER188W	Putative protein of unknown function; conserved across S. cerevisiae strains; large-scale analyses show mRNA expression increases under anaerobic conditions and two-hybrid interactions with Sst2p [Source:SGD;Acc:S000000990]
YKL065W-A	8.32047	0.169227	0.181368	0.893959	0.371344	0.501123	YKL065W-A	Putative protein of unknown function; SWAT-GFP fusion protein localizes to the endoplasmic reticulum (ER) while mCherry fusion localizes to both the ER and vacuole [Source:SGD;Acc:S000113563]
YJL144W	104.983	-0.256942	0.181336	-1.4339	0.151602	0.250113	YJL144W	Cytoplasmic hydrophilin essential in desiccation-rehydration process; expression induced by osmotic stress, starvation and during stationary phase; protein abundance increases in response to DNA replication stress [Source:SGD;Acc:S000003680]
YAL037W	78.9642	0.591902	0.181315	3.17586	0.00149391	0.00500676	YAL037W	Putative protein of unknown function; YAL037W has a paralog, YOR342C, that arose from the whole genome duplication [Source:SGD;Acc:S000000035]
YNL051W	411.023	0.348376	0.181311	1.88178	0.0598662	0.116403	COG5	Component of the conserved oligomeric Golgi complex; a cytosolic tethering complex (Cog1p through Cog8p) that functions in protein trafficking to mediate fusion of transport vesicles to Golgi compartments [Source:SGD;Acc:S000004996]
YDR320C-A	131.527	0.436132	0.181291	2.42325	0.0153825	0.0369674	DAD4	Essential subunit of the Dam1 complex (aka DASH complex); complex couples kinetochores to the force produced by MT depolymerization thereby aiding in chromosome segregation; is transferred to the kinetochore prior to mitosis [Source:SGD;Acc:S000007604]
YDL218W	58.4607	-0.791929	0.181123	-4.40854	1.0407e-05	6.04815e-05	YDL218W	Putative protein of unknown function; YDL218W transcription is regulated by Azf1p and induced by starvation and aerobic conditions; expression also induced in cells treated with the mycotoxin patulin [Source:SGD;Acc:S000002377]
YLR036C	239.01	0.285734	0.180915	1.55714	0.119437	0.206069	YLR036C	Putative protein predicted to have transmembrane domains; interacts with HSP90 by yeast two-hybrid analysis; YLR036C is not an essential protein [Source:SGD;Acc:S000004026]
YMR103C	114.345	0.326411	0.180895	1.74371	0.0812091	0.149279	YMR103C	Putative protein of unknown function; conserved among S. cerevisiae strains; YMR103C is not an essential gene [Source:SGD;Acc:S000004709]
YGL007W	7.62518	0.2792	0.180878	1.45877	0.144629	0.240247	BRP1	Putative protein of unknown function; conserved among S. cerevisiae strains; located in the upstream region of PMA1; deletion leads to polyamine resistance due to downregulation of PMA1 [Source:SGD;Acc:S000002975]
YAL064C-A	8.78983	-0.449899	0.18086	-2.69674	0.00700216	0.0187964	TDA8	Putative protein of unknown function; null mutant is sensitive to expression of the top1-T722A allele; not an essential gene [Source:SGD;Acc:S000002140]
YDR124W	57.0651	0.0521713	0.180815	0.215583	0.829313	0.891494	YDR124W	Putative protein of unknown function; non-essential gene; expression is strongly induced by alpha factor [Source:SGD;Acc:S000002531]
YJR022W	67.5414	0.545741	0.180685	2.95191	0.00315819	0.0094791	LSM8	Lsm (Like Sm) protein; forms heteroheptameric complex (with Lsm2p, Lsm3p, Lsm4p, Lsm5p, Lsm6p, and Lsm7p) that is part of spliceosomal U6 snRNP and is also implicated in processing of pre-tRNA, pre-snoRNA, and pre-rRNA [Source:SGD;Acc:S000003783]
YAR035W	109.6	0.566268	0.180606	3.03288	0.0024223	0.00758507	YAT1	Outer mitochondrial carnitine acetyltransferase; minor ethanol-inducible enzyme involved in transport of activated acyl groups from the cytoplasm into the mitochondrial matrix; phosphorylated [Source:SGD;Acc:S000000080]
YBR174C	6.34347	-0.324701	0.180576	-1.95962	0.0500398	0.100431	YBR174C	Dubious open reading frame; unlikely to encode a functional protein, based on available experimental and comparative sequence data; partially overlaps the verified ORF YBR175W; null mutant is viable and sporulation defective [Source:SGD;Acc:S000000378]
YHL018W	96.6013	0.0341279	0.180547	0.201414	0.840375	0.898322	YHL018W	Putative 4a-hydroxytetrahydrobiopterin dehydratase; green fluorescent protein (GFP)-fusion protein localizes to mitochondria and is induced in response to the DNA-damaging agent MMS [Source:SGD;Acc:S000001010]
YDR540C	73.3877	-0.219963	0.180451	-1.25314	0.210154	0.323321	IRC4	Protein of unknown function; null mutant displays increased levels of spontaneous Rad52p foci; green fluorescent protein (GFP)-fusion protein localizes to the cytoplasm and nucleus [Source:SGD;Acc:S000002948]
YJR128W	6.40051	0.0106215	0.180442	0.00626429	0.995002	0.996427	YJR128W	Putative protein of unknown function; conserved among S. cerevisiae strains; partially overlaps the verified ORF RSF2 [Source:SGD;Acc:S000003889]
YNL204C	57.7452	0.0229512	0.180413	0.146623	0.88343	0.925071	SPS18	Protein of unknown function, contains a putative zinc-binding domain; expressed during sporulation; SPS18 has a paralog, GCS1, that arose from the whole genome duplication [Source:SGD;Acc:S000005148]
YPL119C	69.3152	-0.357043	0.180269	-2.00143	0.0453466	0.0921871	DBP1	Putative ATP-dependent RNA helicase of the DEAD-box protein family; mutants show reduced stability of the 40S ribosomal subunit scanning through 5' untranslated regions of mRNAs; protein abundance increases in response to DNA replication stress; DBP1 has a paralog, DED1, that arose from the whole genome duplication [Source:SGD;Acc:S000006040]
YBR076C-A	77.8836	0.635256	0.180267	3.39607	0.000683617	0.00251032	YBR076C-A	Dubious open reading frame; unlikely to encode a functional protein, based on available experimental and comparative sequence data; partially overlaps verified gene ECM8; identified by fungal homology and RT-PCR [Source:SGD;Acc:S000028533]
YHR180W	51.6025	-0.0939036	0.180223	-0.524931	0.599631	0.712359	YHR180W	Putative protein of unknown function; conserved among S. cerevisiae strains [Source:SGD;Acc:S000001223]
YDR509W	9.85003	-0.0887853	0.180154	-0.425828	0.670233	0.772043	YDR509W	Dubious open reading frame; unlikely to encode a functional protein, based on available experimental and comparative sequence data [Source:SGD;Acc:S000002917]
YDR022C	73.8873	0.0243781	0.180118	0.130592	0.896098	0.932701	YDR022C	Autophagy-specific protein required for autophagosome formation; forms a complex with Atg17p and Atg29p that localizes other proteins to the pre-autophagosomal structure; constitutively phosphorylated, and phosphorylation of residue S174 is required for function; high-copy suppressor of CIK1 deletion [Source:SGD;Acc:S000002429]
YDL059C	57.155	0.14555	0.180089	0.813842	0.415736	0.543821	RAD59	Protein involved DNA double-strand break repair; repairs breaks in DNA during vegetative growth via recombination and single-strand annealing; anneals complementary single-stranded DNA; forms nuclear foci upon DNA replication stress; required for loading of Rad52p to DSBs; regulates replication fork progression in DNA ligase I-deficient cells; paralog of Rad52p [Source:SGD;Acc:S000002217]
YBR277C	5.54437	-0.364997	0.180061	-1.79444	0.0727423	0.136996	YBR277C	Dubious open reading frame; unlikely to encode a functional protein, based on available experimental and comparative sequence data; partially overlaps the verified gene YBR278W [Source:SGD;Acc:S000000481]
YHR032W-A	59.4573	-0.226642	0.179988	-1.24385	0.213555	0.327274	YHR032W-A	Dubious open reading frame; unlikely to encode a functional protein, based on available experimental and comparative sequence data; partially overlaps the dubious ORF YHR032C-A [Source:SGD;Acc:S000028831]
YBL029W	81.0621	0.611727	0.179948	3.2768	0.00104991	0.00366914	YBL029W	Non-essential protein of unknown function [Source:SGD;Acc:S000000125]
YFR042W	276.775	0.424494	0.179929	2.32969	0.0198226	0.0456674	KEG1	Integral membrane protein of the ER; physically interacts with Kre6p; has a role in the synthesis of beta-1,6-glucan in the cell wall; required for cell viability [Source:SGD;Acc:S000001938]
YGL214W	6.2218	-0.0523851	0.1799	-0.296242	0.767045	0.847723	YGL214W	Dubious open reading frame; unlikely to encode a functional protein, based on available experimental and comparative sequence data; deletion mutation phenotype is likely due to the overlapping verified ORF SKI8/YGL213C [Source:SGD;Acc:S000003182]
YML054C	99.1255	1.66309	0.179852	8.79058	1.48786e-18	5.54118e-17	CYB2	Cytochrome b2 (L-lactate cytochrome-c oxidoreductase); component of the mitochondrial intermembrane space, required for lactate utilization; expression is repressed by glucose and anaerobic conditions [Source:SGD;Acc:S000004518]
YHR199C-A	109.572	0.0521226	0.179837	0.313399	0.753978	0.838878	NBL1	Subunit of the conserved chromosomal passenger complex (CPC); complex regulates mitotic chromosome segregation; not required for the kinase activity of the complex; mediates the interaction of Sli15p and Bir1p; other complex members are Ipl1p, Sli15p, and Bir1p [Source:SGD;Acc:S000029704]
YDL204W	162.193	0.308755	0.179774	1.62211	0.104779	0.18447	RTN2	Reticulon protein; involved in nuclear pore assembly and maintenance of tubular ER morphology; promotes membrane curvature; regulates the ER asymmetry-induced inheritance block during ER stress; role in ER-derived peroxisomal biogenesis; interacts with Sec6p, Yip3p, and Sbh1p; less abundant than RTN1; member of RTNLA (reticulon-like A) subfamily; protein increases in abundance and relocalizes to …
YLR273C	116.322	0.0701955	0.179722	0.380516	0.703562	0.800763	PIG1	Putative targeting subunit for type-1 protein phosphatase Glc7p; tethers Glc7p to Gsy2p glycogen synthase; PIG1 has a paralog, GAC1, that arose from the whole genome duplication [Source:SGD;Acc:S000004263]
YEL028W	69.2368	0.480288	0.179625	2.64313	0.00821428	0.021623	YEL028W	Putative protein of unknown function; conserved among S. cerevisiae strains; YEL028C is not an essential gene [Source:SGD;Acc:S000000754]
YDR009W	70.2029	0.399832	0.179606	2.23993	0.0250955	0.0558846	GAL3	Transcriptional regulator; involved in activation of the GAL genes in response to galactose; forms a complex with Gal80p to relieve Gal80p inhibition of Gal4p; binds galactose and ATP but does not have galactokinase activity; GAL3 has a paralog, GAL1, that arose from the whole genome duplication [Source:SGD;Acc:S000002416]
YMR118C	7.40047	-0.0624891	0.179547	-0.437466	0.661773	0.764819	SHH3	Putative mitochondrial inner membrane protein of unknown function; although similar to paralogous Sdh3p, Shh3p is not a stoichiometric subunit of either succinate dehydrogenase or of the TIM22 translocase; SHH3 has a paralog, SDH3, that arose from the whole genome duplication [Source:SGD;Acc:S000004724]
YDR286C	113.263	-0.0110166	0.179498	-0.0532618	0.957523	0.972775	YDR286C	Putative protein of unknown function; predicted to have thiol-disulfide oxidoreductase active site [Source:SGD;Acc:S000002694]
YOR044W	182.55	1.14413	0.179483	6.13589	8.46863e-10	1.00569e-08	IRC23	Protein of unknown function; green fluorescent protein (GFP)-fusion localizes to the ER; null mutant displays increased levels of spontaneous Rad52p foci; IRC23 has a paralog, BSC2, that arose from the whole genome duplication [Source:SGD;Acc:S000005570]
YBR196C-B	66.9916	0.0393165	0.179447	0.211858	0.832218	0.893548	YBR196C-B	Putative protein of unknown function; identified by expression profiling and mass spectrometry [Source:SGD;Acc:S000028816]
YPR096C	8.00585	-0.052405	0.179433	-0.321384	0.74792	0.834288	YPR096C	Protein of unknown function; may interact with ribosomes, based on co-purification experiments [Source:SGD;Acc:S000006300]
YCL026C-B	126.162	0.613015	0.179405	3.35054	0.00080653	0.00289743	HBN1	Protein of unknown function; similar to bacterial nitroreductases; green fluorescent protein (GFP)-fusion protein localizes to the cytoplasm and nucleus; protein becomes insoluble upon intracellular iron depletion; protein abundance increases in response to DNA replication stress [Source:SGD;Acc:S000007548]
YMR316C-A	7.02992	0.128403	0.179299	0.737827	0.460619	0.588897	YMR316C-A	Protein of unknown function; SWAT-GFP and mCherry fusion proteins localize to the endoplasmic reticulum; mRNA identified as translated by ribosome profiling data; overlaps the verified gene DIA1/YMR316W [Source:SGD;Acc:S000004933]
YHR028W-A	5.15848	0.188385	0.179291	0.890021	0.373455	0.502463	YHR028W-A	Dubious open reading frame; unlikely to encode a functional protein, based on available experimental and comparative sequence data; overlaps ORF DAP2/YHR028C [Source:SGD;Acc:S000028776]
YMR094W	174.916	-0.0569356	0.179243	-0.323792	0.746095	0.833054	CTF13	Subunit of the CBF3 complex; CBF3 binds to the CDE III element of centromeres, bending the DNA upon binding, and may be involved in sister chromatid cohesion during mitosis [Source:SGD;Acc:S000004700]
YKL086W	6.34018	0.280722	0.179157	1.92024	0.0548278	0.108518	SRX1	Sulfiredoxin; contributes to oxidative stress resistance by reducing cysteine-sulfinic acid groups in the peroxiredoxin Tsa1p, which is formed upon exposure to oxidants; conserved in higher eukaryotes; protein abundance increases in response to DNA replication stress [Source:SGD;Acc:S000001569]
YEL011W	141.9	0.288754	0.179058	1.58795	0.112297	0.195464	GLC3	Glycogen branching enzyme, involved in glycogen accumulation; green fluorescent protein (GFP)-fusion protein localizes to the cytoplasm in a punctate pattern; relocalizes from nucleus to cytoplasmic foci upon DNA replication stress; glycogen accumulation defect of the null mutant is functionally complemented by human GBE1, which is associated with glycogen storage disease [Source:SGD;Acc:S0000007…
YMR053C	60.1789	-0.194854	0.178958	-1.09583	0.273153	0.39468	STB2	Protein that interacts with Sin3p in a two-hybrid assay; part of a large protein complex with Sin3p and Stb1p; STB2 has a paralog, STB6, that arose from the whole genome duplication [Source:SGD;Acc:S000004657]
YNL270C	85.0904	0.220248	0.178937	1.25472	0.20958	0.322676	ALP1	Arginine transporter; expression is normally very low and it is unclear what conditions would induce significant expression; ALP1 has a paralog, CAN1, that arose from the whole genome duplication [Source:SGD;Acc:S000005214]
YJL077W-B	88.9754	0.266398	0.178933	1.47394	0.140499	0.234687	YJL077W-B	Putative protein of unknown function; identified by gene-trapping, microarray-based expression analysis, and genome-wide homology searching [Source:SGD;Acc:S000028662]
YGR043C	80.9849	1.06355	0.178806	5.70415	1.16922e-08	1.14806e-07	NQM1	Transaldolase of unknown function; transcription is repressed by Mot1p and induced by alpha-factor and during diauxic shift; NQM1 has a paralog, TAL1, that arose from the whole genome duplication [Source:SGD;Acc:S000003275]
YCR007C	166.718	-0.136485	0.178581	-0.796482	0.425752	0.554456	YCR007C	Putative integral membrane protein; member of DUP240 gene family; SWAT-GFP and mCherry fusion proteins localize to the cell periphery and vacuole; YCR007C is not an essential gene [Source:SGD;Acc:S000000600]
YLL017W	7.2062	-0.492134	0.178428	-2.85735	0.004272	0.0122945	YLL017W	Non-essential Ras guanine nucleotide exchange factor (GEF); localized to the membrane; expressed in poor nutrient conditions and on nonfermentable carbon sources; contains a stop codon in S288C, full-length gene includes YLL016W; SDC25 has a paralog, CDC25, that arose from the whole genome duplication [Source:SGD;Acc:S000003940]
snR8	10.943	-0.205313	0.178382	-1.41094	0.158263	0.259133	snR8	H/ACA box small nucleolar RNA (snoRNA); guides pseudouridylation of large subunit (LSU) rRNA at positions U960 and U986 [Source:SGD;Acc:S000006497]
YAL037C-B	18.9492	-0.0219422	0.178332	0.0797441	0.936441	0.959772	YAL037C-B	Dubious open reading frame; unlikely to encode a functional protein, based on available experimental and comparative sequence data; identified by gene-trapping, microarray-based expression analysis, and genome-wide homology searching [Source:SGD;Acc:S000028592]
YFR027W	66.398	0.0610054	0.178327	0.367125	0.713526	0.808012	ECO1	Acetyltransferase; required for establishment of sister chromatid cohesion; acetylates Mps3p to regulate nuclear organization; modifies Smc3p at replication forks and Mcd1p in response to dsDNA breaks; phosphorylated by three kinases (Cdc28p, Cdc7p, Mck1p) to generate pair of phosphates spaced precisely for recognition by ubiquitin ligase SCF-Cdc4; mutations in human homolog ESCO2 cause Roberts s…
YLR265C	234.327	0.21361	0.178291	1.17155	0.241378	0.359157	NEJ1	Protein involved in regulation of nonhomologous end joining; interacts with DNA ligase IV components Dnl4p and Lif1p; repressed by MAT heterozygosity; regulates cellular distribution of Lif1p [Source:SGD;Acc:S000004255]
YLR462W	9.07554	-0.110046	0.178283	-0.626793	0.530795	0.652122	YLR462W	Putative protein of unknown function with similarity to helicases; YLR462W is within the telomere on the right arm of chromosome XII [Source:SGD;Acc:S000004454]
YPL114W	64.8439	0.251915	0.178121	1.41917	0.155849	0.255979	YPL114W	Dubious open reading frame; unlikely to encode a functional protein, based on available experimental and comparative sequence data; largely overlaps ORF YPL113C; diploid deletion in BY4743 strain background exhibits high budding index [Source:SGD;Acc:S000006035]
YOR302W	119.769	-0.0858379	0.178117	-0.466301	0.641	0.746568	YOR302W	CPA1 uORF; Arginine attenuator peptide, regulates translation of the CPA1 mRNA [Source:SGD;Acc:S000005828]
YDR271C	5.90273	-0.301151	0.178035	-1.61601	0.106093	0.186418	YDR271C	Dubious open reading frame; unlikely to encode a functional protein, based on available experimental and comparative sequence data; partially overlaps the verified ORF CCC2/YDR270W [Source:SGD;Acc:S000002679]
YGL159W	467.783	0.226485	0.177939	1.24956	0.211462	0.324382	YGL159W	Putative protein of unknown function; deletion mutant has no detectable phenotype [Source:SGD;Acc:S000003127]
YER096W	145.242	-0.504769	0.177857	-2.90547	0.00366705	0.0107853	SHC1	Sporulation-specific activator of Chs3p (chitin synthase III); required for the synthesis of the chitosan layer of ascospores; transcriptionally induced at alkaline pH; SHC1 has a paralog, SKT5, that arose from the whole genome duplication [Source:SGD;Acc:S000000898]
YJL114W	7.51055	0.398067	0.177765	2.24063	0.0250504	0.0558113	YJL114W	Retrotransposon TYA Gag gene co-transcribed with TYB Pol; translated as TYA or TYA-TYB polyprotein; Gag is a nucleocapsid protein that is the structural constituent of virus-like particles (VLPs); similar to retroviral Gag [Source:SGD;Acc:S000003650]
YPR066W	119.416	-0.0101271	0.177669	-0.0442663	0.964692	0.976586	UBA3	Protein that activates Rub1p (NEDD8) before neddylation; acts together with Ula1p; may play a role in protein degradation; GFP-fusion protein localizes to the cytoplasm in a punctate pattern [Source:SGD;Acc:S000006270]
YBR302C	47.4473	0.321706	0.177575	1.78169	0.0748003	0.140075	COS2	Endosomal protein involved in turnover of plasma membrane proteins; member of the DUP380 subfamily of conserved, often subtelomeric COS genes; required for the multivesicular vesicle body sorting pathway that internalizes plasma membrane proteins for degradation; Cos proteins provide ubiquitin in trans for nonubiquitinated cargo proteins [Source:SGD;Acc:S000000506]
YNR032C-A	136.393	0.478274	0.177393	2.67414	0.0074921	0.0199388	HUB1	Ubiquitin-like protein modifier; promotes alternative splicing of SRC1 pre-mRNA; binds non-covalently to the HIND domain of Snu66, may function in modification of Sph1p and Hbt1p, functionally complemented by the human or S. pombe ortholog; mechanism of Hub1p adduct formation not yet clear [Source:SGD;Acc:S000007251]
YMR186W	28574.1	0.0510102	0.177361	0.302675	0.762138	0.844226	HSC82	Cytoplasmic chaperone of the Hsp90 family; plays a role in determining prion variants; redundant in function and nearly identical with Hsp82p, and together they are essential; expressed constitutively at 10-fold higher basal levels than HSP82 and induced 2-3 fold by heat shock; contains two acid-rich unstructured regions that promote the solubility of chaperone-substrate complexes; HSC82 has a pa…
YNR069C	114.068	-0.089104	0.177234	-0.570994	0.568004	0.685263	BSC5	Protein of unknown function; shows homology with N-terminal end of Bul1p; ORF exhibits genomic organization compatible with a translational readthrough-dependent mode of expression; readthrough expression includes YNR068C and the locus for this readthrough is termed BUL3; Bul3p is involved in ubiquitin-mediated sorting of plasma membrane proteins; readthrough and shortened forms of Bul3p interact…
YOR152C	107.477	0.47004	0.177147	2.6116	0.00901198	0.0234096	ATG40	Autophagy receptor with a role in endoplasmic reticulum degradation; involved specifically in autophagy of cortical and cytoplasmic ER in response to nitrogen starvation or rapamycin treatment; localizes to the cortical and cytoplasmic ER; similar to human FAM134B, which is also involved in ER autophagy and is associated with sensory neuropathy [Source:SGD;Acc:S000005678]
YDR078C	120.845	0.124335	0.177109	0.673532	0.500609	0.626159	SHU2	Component of Shu complex (aka PCSS complex); Shu complex also includes Psy3, Csm2, Shu1, and promotes error-free DNA repair, Shu complex mediates inhibition of Srs2p function; promotes formation of Rad51p filaments; important for both mitotic and meiotic homologous recombination, and contains a conserved SWIM domain that is necessary for both [Source:SGD;Acc:S000002485]
YNL117W	17.6189	0.240129	0.177067	1.019	0.308202	0.436065	MLS1	Malate synthase, enzyme of the glyoxylate cycle; involved in utilization of non-fermentable carbon sources; expression is subject to carbon catabolite repression; localizes in peroxisomes during growth on oleic acid, otherwise cytosolic; can accept butyryl-CoA as acyl-CoA donor in addition to traditional substrate acetyl-CoA [Source:SGD;Acc:S000005061]
YEL034C-A	6.43759	0.460508	0.176987	2.2381	0.0252146	0.0560455	YEL034C-A	Dubious open reading frame; unlikely to encode a functional protein, based on available experimental and comparative sequence data; completely overlaps HYP2/YEL034W, a verified gene that encodes eiF-5A [Source:SGD;Acc:S000028743]
YDR131C	263.259	0.241598	0.176937	1.35159	0.176506	0.28139	YDR131C	F-box protein subunit of SCF ubiquitin ligase complex; substrate-specific adaptor subunit that recruits substrates to a core ubiquitination complex [Source:SGD;Acc:S000002538]
YMR257C	395.173	-0.339916	0.176935	-1.92488	0.0542439	0.107547	PET111	Mitochondrial translational activator specific for the COX2 mRNA; located in the mitochondrial inner membrane [Source:SGD;Acc:S000004870]
YJR115W	69.7999	-0.63387	0.176895	-3.6171	0.000297927	0.00119818	YJR115W	Putative protein of unknown function; YJR115W has a paralog, ECM13, that arose from the whole genome duplication [Source:SGD;Acc:S000003876]
YGR069W	6.62187	-0.203127	0.176482	-1.40124	0.161143	0.263163	YGR069W	Dubious open reading frame; unlikely to encode a functional protein, based on available experimental and comparative sequence data [Source:SGD;Acc:S000003301]
YNL179C	6.25184	-0.211436	0.176481	-1.34623	0.17823	0.283349	YNL179C	Dubious open reading frame; unlikely to encode a functional protein, based on available experimental and comparative sequence data; not conserved in closely related Saccharomyces species; deletion in cyr1 mutant results in loss of stress resistance [Source:SGD;Acc:S000005123]
YLR164W	82.8047	-0.132158	0.17647	-0.724316	0.468872	0.5962	SHH4	Putative alternate subunit of succinate dehydrogenase (SDH); mitochondrial inner membrane protein; genetic interaction with SDH4 suggests that Shh4p can function as a functional SDH subunit; a fraction copurifies with SDH subunit Sdh3p; expression induced by nitrogen limitation in a GLN3, GAT1-dependent manner; Shh4p has greater similarity to human SDHD (subunit D of SDH, implicated in paragangli…
YGL063C-A	5.32562	-0.0350547	0.176389	-0.264135	0.791676	0.863272	YGL063C-A	Dubious open reading frame unlikely to encode a functional protein; identified by gene-trapping, microarray-based expression analysis, and genome-wide homology searching [Source:SGD;Acc:S000028633]
YEL075W-A	10.9624	0.0344136	0.176382	0.247339	0.804646	0.873481	YEL075W-A	Dubious open reading frame; unlikely to encode a functional protein, based on available experimental and comparative sequence data [Source:SGD;Acc:S000002956]
YIR013C	6.1419	0.0263338	0.17635	0.187181	0.851518	0.904262	GAT4	Protein containing GATA family zinc finger motifs; involved in spore wall assembly; sequence similarity to GAT3, and the double mutant gat3 gat4 exhibits reduced dityrosine fluorescence relative to the single mutants [Source:SGD;Acc:S000001452]
YGL007C-A	7.00302	-0.00829963	0.176324	0.051494	0.958932	0.97352	YGL007C-A	Putative protein of unknown function; identified by gene-trapping, microarray-based expression analysis, and genome-wide homology searching; deletion exhibits slow-growth phenotype; computationally predicted to have a role in cell budding [Source:SGD;Acc:S000028632]
YLR284C	69.0255	-0.19057	0.176028	-1.09334	0.274243	0.395982	ECI1	Peroxisomal delta3,delta2-enoyl-CoA isomerase; hexameric protein that converts 3-hexenoyl-CoA to trans-2-hexenoyl-CoA, essential for the beta-oxidation of unsaturated fatty acids, oleate-induced; ECI1 has a paralog, DCI1, that arose from the whole genome duplication [Source:SGD;Acc:S000004274]
YER142C	120.789	0.498715	0.176002	2.94268	0.00325383	0.00972904	MAG1	3-methyl-adenine DNA glycosylase; involved in protecting DNA against alkylating agents; initiates base excision repair by removing damaged bases to create abasic sites that are subsequently repaired; protein abundance increases in response to DNA replication stress [Source:SGD;Acc:S000000944]
YDR433W	5.63453	0.000174933	0.175999	-0.00280043	0.997766	0.998001	YDR433W	Dubious open reading frame; unlikely to encode a functional protein, based on available experimental and comparative sequence data [Source:SGD;Acc:S000002841]
YNL211C	141.116	0.433989	0.175926	2.40849	0.0160188	0.0382232	MRX7	Protein that associates with mitochondrial ribosome; green fluorescent protein (GFP)-fusion protein localizes to mitochondria; YNL211C is not an essential gene [Source:SGD;Acc:S000005155]
YJL034W	10592.1	-0.541009	0.175913	-3.15341	0.00161377	0.00535992	KAR2	ATPase involved in protein import into the ER; also acts as a chaperone to mediate protein folding in the ER and may play a role in ER export of soluble proteins; regulates the unfolded protein response via interaction with Ire1p [Source:SGD;Acc:S000003571]
YHL008C	81.7322	-0.158153	0.175903	-0.941287	0.346558	0.476113	YHL008C	Putative protein of unknown function; may be involved in the uptake of chloride ions; does not appear to be involved in monocarboxylic acid transport; green fluorescent protein (GFP)-fusion protein localizes to the vacuole [Source:SGD;Acc:S000001000]
snR81	5.92691	0.177091	0.175872	1.10893	0.267462	0.388508	snR81	H/ACA box small nucleolar RNA (snoRNA); guides pseudouridylation of large subunit (LSU) rRNA at position U1052, constitutive pseudouridylation of U2 snRNA (LSR1) at position 42, and stress-induced U2 pseudouridylation at position 93 [Source:SGD;Acc:S000081375]
YGR160W	15.5649	0.125481	0.175806	0.679949	0.496537	0.622426	YGR160W	Dubious open reading frame; unlikely to encode a functional protein, based on available experimental and comparative sequence data [Source:SGD;Acc:S000003392]
YIL089W	91.66	0.0894493	0.17578	0.508419	0.61116	0.721155	YIL089W	Protein of unknown function found in the ER and vacuole lumen; overexpression of YIL089W affects endocytic protein trafficking [Source:SGD;Acc:S000001351]
YDR169C-A	7.06052	-0.187885	0.17576	-1.17736	0.239051	0.356283	YDR169C-A	Putative protein of unknown function; identified by fungal homology and RT-PCR [Source:SGD;Acc:S000028538]
YPR170C	5.38925	0.0451714	0.175722	0.194767	0.845576	0.900716	YPR170C	Dubious open reading frame; unlikely to encode a functional protein, based on available experimental and comparative sequence data; partially overlaps ORFs YPR169W-A and YPR170W-B [Source:SGD;Acc:S000006374]
YKR073C	6.3919	0.0339701	0.175604	0.132861	0.894304	0.931578	YKR073C	Putative protein of unknown function; conserved across S. cerevisiae strains [Source:SGD;Acc:S000001781]
YCR104W	7.00193	-0.100055	0.175559	-0.612358	0.540301	0.660577	PAU3	Member of the seripauperin multigene family; encoded mainly in subtelomeric region; active during alcoholic fermentation; regulated by anaerobiosis; negatively regulated by oxygen; repressed by heme [Source:SGD;Acc:S000000701]
YGR131W	128.85	-0.672291	0.17551	-3.8793	0.000104757	0.000475029	FHN1	Protein of unknown function; induced by ketoconazole; promoter region contains sterol regulatory element motif, which has been identified as a Upc2p-binding site; overexpression complements function of Nce102p in NCE102 deletion strain; FHN1 has a paralog, NCE102, that arose from the whole genome duplication [Source:SGD;Acc:S000003363]
YOR105W	6.72156	0.315163	0.175497	1.61228	0.106902	0.187421	YOR105W	Protein of unknown function; expressed at both mRNA and protein levels [Source:SGD;Acc:S000005631]
YOL083W	72.0062	0.1472	0.175485	0.83257	0.405087	0.534175	ATG34	Receptor protein involved in selective autophagy during starvation; specifically involved in the transport of cargo protein alpha-mannosidase (Ams1p); Atg19p paralog [Source:SGD;Acc:S000005443]
YBR182C-A	5.71024	0.471437	0.175446	2.08734	0.0368576	0.0774046	YBR182C-A	Putative protein of unknown function; identified by gene-trapping, microarray-based expression analysis, and genome-wide homology searching [Source:SGD;Acc:S000028603]
YNL250W	352.341	0.0653694	0.175403	0.370474	0.711029	0.806055	RAD50	Subunit of MRX complex with Mre11p and Xrs2p; complex is involved in processing double-strand DNA breaks in vegetative cells, initiation of meiotic DSBs, telomere maintenance, and nonhomologous end joining; forms nuclear foci upon DNA replication stress [Source:SGD;Acc:S000005194]
YNR057C	112.039	0.17157	0.175319	0.962526	0.335785	0.465104	BIO4	Dethiobiotin synthetase; catalyzes the third step in the biotin biosynthesis pathway; BIO4 is in a cluster of 3 genes (BIO3, BIO4, and BIO5) that mediate biotin synthesis; BIO3 and BIO4 were acquired by horizontal gene transfer (HGT) from bacteria; expression appears to be repressed at low iron levels [Source:SGD;Acc:S000005340]
YDL025W-A	5.83747	-0.0382927	0.175264	-0.361747	0.717541	0.8111	YDL025W-A	Dubious open reading frame; unlikely to encode a functional protein, based on available experimental and comparative sequence data; completely overlaps the ORF YDL025C; identified by gene-trapping, microarray expression analysis, and genome-wide homology searching [Source:SGD;Acc:S000028610]
YLR004C	84.7585	-0.0171757	0.175248	-0.127932	0.898203	0.934119	THI73	Putative plasma membrane permease; proposed to be involved in carboxylic acid uptake and repressed by thiamine; substrate of Dbf2p/Mob1p kinase; transcription is altered if mitochondrial dysfunction occurs [Source:SGD;Acc:S000003994]
YDR256C	88.1405	0.110309	0.175241	0.635004	0.525426	0.647585	CTA1	Catalase A; breaks down hydrogen peroxide in the peroxisomal matrix formed by acyl-CoA oxidase (Pox1p) during fatty acid beta-oxidation [Source:SGD;Acc:S000002664]
YHR021C	12079.2	-0.127175	0.1751	-0.698664	0.484762	0.610341	RPS27B	Protein component of the small (40S) ribosomal subunit; homologous to mammalian ribosomal protein S27, no bacterial homolog; RPS27B has a paralog, RPS27A, that arose from the whole genome duplication [Source:SGD;Acc:S000001063]
tE(UUC)K	6.09984	-0.381407	0.175057	-2.61268	0.00898356	0.0233719	tE(UUC)K	Glutamate tRNA (tRNA-Glu), predicted by tRNAscan-SE analysis; thiolation of uridine at wobble position (34) requires Ncs6p [Source:SGD;Acc:S000006558]
YGR259C	6.48886	0.622349	0.174938	2.93602	0.00332458	0.00988889	YGR259C	Dubious open reading frame; unlikely to encode a functional protein, based on available experimental and comparative sequence data; overlaps almost completely with the verified ORF TNA1/YGR260W [Source:SGD;Acc:S000003491]
YER071C	238.94	0.336283	0.174884	1.89366	0.0582707	0.113723	TDA2	Protein of unknown function; green fluorescent protein (GFP)-fusion protein localizes to the cytoplasm in a punctate pattern; null mutant is sensitive to expression of the top1-T722A allele [Source:SGD;Acc:S000000873]
YMR187C	239.089	0.326249	0.174807	1.82986	0.0672715	0.128195	YMR187C	Putative protein of unknown function; YMR187C is not an essential gene [Source:SGD;Acc:S000004799]
YGL177W	6.9964	0.0243736	0.174726	0.0817452	0.934849	0.95939	YGL177W	Dubious open reading frame; unlikely to encode a functional protein, based on available experimental and comparative sequence data [Source:SGD;Acc:S000003145]
YKL066W	6.13404	-0.0437331	0.174668	-0.198542	0.842621	0.899255	YKL066W	Dubious open reading frame; unlikely to encode a functional protein, based on available experimental and comparative sequence data; not conserved in closely related Saccharomyces species; partially overlaps the verified gene YNK1 [Source:SGD;Acc:S000001549]
YML034C-A	5.91974	0.194989	0.174628	0.94691	0.343685	0.47313	YML034C-A	Dubious open reading frame; unlikely to encode a functional protein, based on available experimental and comparative sequence data; overlaps ORF SRC1/YML034W [Source:SGD;Acc:S000004499]
YAR029W	59.7401	0.496529	0.174546	2.77704	0.00548561	0.0152637	YAR029W	Member of DUP240 gene family but contains no transmembrane domains; green fluorescent protein (GFP)-fusion protein localizes to the cytoplasm in a punctate pattern [Source:SGD;Acc:S000000077]
YPL124W	118.504	-0.138981	0.174528	-0.834628	0.403927	0.533117	SPC29	Inner plaque spindle pole body (SPB) component; links the central plaque component Spc42p to the inner plaque component Spc110p; required for SPB duplication [Source:SGD;Acc:S000006045]
snR38	18.9573	0.17904	0.17451	1.0845	0.278141	0.399805	snR38	C/D box small nucleolar RNA (snoRNA); guides 2'-O-methylation of large subunit (LSU) rRNA at position G2815 [Source:SGD;Acc:S000007301]
YKR075C	135.42	1.00825	0.174442	5.57269	2.50837e-08	2.32857e-07	YKR075C	Protein of unknown function; similar to Reg1p; expression regulated by glucose and Rgt1p; GFP-fusion protein is induced in response to the DNA-damaging agent MMS; YKR075C has a paralog, YOR062C, that arose from the whole genome duplication [Source:SGD;Acc:S000001783]
YHR038W	273.603	-0.0378732	0.174378	-0.221571	0.824648	0.887996	RRF1	Mitochondrial ribosome recycling factor; essential for mitochondrial protein synthesis and for the maintenance of the respiratory function of mitochondria [Source:SGD;Acc:S000001080]
YJR149W	180.814	0.588954	0.174306	3.33134	0.000864285	0.0030807	YJR149W	Putative protein of unknown function; green fluorescent protein (GFP)-fusion protein localizes to the cytoplasm [Source:SGD;Acc:S000003910]
YOR388C	6.27874	0.624158	0.174219	2.70897	0.00674921	0.0182081	FDH1	NAD(+)-dependent formate dehydrogenase; may protect cells from exogenous formate [Source:SGD;Acc:S000005915]
YCR006C	83.5283	0.147759	0.174127	0.856053	0.391968	0.522127	YCR006C	Putative protein of unknown function; conserved among S. cerevisiae strains; YCR006C is not an essential gene [Source:SGD;Acc:S000000599]
YPR158W	283.167	0.0205085	0.173862	0.24096	0.809586	0.877496	CUR1	Sorting factor, central regulator of spatial protein quality control; physically and functionally interacts with chaperones to promote sorting and deposition of misfolded proteins into cytosolic compartments; involved in destabilization of [URE3] prions; CUR1 has a paralog, BTN2, that arose from the whole genome duplication [Source:SGD;Acc:S000006362]
YMR175W	7.08728	0.812313	0.17381	3.4374	0.000587318	0.00220165	SIP18	Phospholipid-binding hydrophilin; essential to overcome desiccation-rehydration process; expression is induced by osmotic stress; SIP18 has a paralog, GRE1, that arose from the whole genome duplication [Source:SGD;Acc:S000004787]
YPR010C-A	520.924	0.54695	0.173702	3.09555	0.00196451	0.00635387	YPR010C-A	Putative protein of unknown function; SWAT-GFP, seamless-GFP and mCherry fusion proteins localize to the cytosol; conserved among Saccharomyces sensu stricto species [Source:SGD;Acc:S000122558]
YER037W	514.859	2.42495	0.173701	13.448	3.16447e-41	9.95858e-39	PHM8	Lysophosphatidic acid (LPA) phosphatase, nucleotidase; principle and physiological nucleotidase working on GMP, UMP and CMP; involved in LPA hydrolysis in response to phosphate starvation and ribose salvage pathway; phosphatase activity is soluble and Mg2+ dependent; expression is induced by low phosphate levels and by inactivation of Pho85p; repressed by Gcn4p under normal conditions; PHM8 has a…
YLL052C	260.082	-1.16113	0.1735	-6.7965	1.07188e-11	1.72985e-10	AQY2	Water channel that mediates water transport across cell membranes; only expressed in proliferating cells; controlled by osmotic signals; may be involved in freeze tolerance; disrupted by a stop codon in many S. cerevisiae strains [Source:SGD;Acc:S000003975]
YAL061W	98.4006	-0.652979	0.173481	-3.88546	0.000102138	0.000465502	BDH2	Putative medium-chain alcohol dehydrogenase with similarity to BDH1; transcription induced by constitutively active PDR1 and PDR3 [Source:SGD;Acc:S000000057]
YLR342W-A	10.7417	0.276177	0.173418	1.18865	0.234579	0.351273	YLR342W-A	Putative protein of unknown function [Source:SGD;Acc:S000028571]
YJR078W	112.574	-1.07653	0.173338	-6.41595	1.39951e-10	1.91489e-09	BNA2	Tryptophan 2,3-dioxygenase or indoleamine 2,3-dioxygenase; required for de novo biosynthesis of NAD from tryptophan via kynurenine; interacts genetically with telomere capping gene CDC13; regulated by Hst1p and Aftp [Source:SGD;Acc:S000003839]
YEL075C	7.86915	-0.35946	0.173317	-2.46487	0.0137062	0.0334626	YEL075C	Putative protein of unknown function [Source:SGD;Acc:S000000801]
YHL002C-A	6.216	0.156574	0.173292	0.821166	0.411551	0.540097	YHL002C-A	Dubious open reading frame; unlikely to encode a functional protein, based on available experimental and comparative sequence data; overlaps ORF HSE1/YHL002W [Source:SGD;Acc:S000028770]
snR64	6.54506	-0.0908466	0.173261	-0.581809	0.560695	0.679441	snR64	C/D box small nucleolar RNA (snoRNA); guides 2'-O-methylation of large subunit (LSU) rRNA at position C2337 [Source:SGD;Acc:S000006455]
YJL152W	5.44804	-0.240317	0.173227	-1.35513	0.175377	0.279874	YJL152W	Dubious open reading frame; unlikely to encode a functional protein, based on available experimental and comparative sequence data [Source:SGD;Acc:S000003688]
YDL241W	440.254	-0.272519	0.173153	-1.71052	0.0871695	0.158293	YDL241W	Putative protein of unknown function; SWAT-GFP and mCherry fusion proteins localize to the endoplasmic reticulum; YDL241W is not an essential gene [Source:SGD;Acc:S000002400]
YPL277C	88.9639	0.217405	0.173127	1.28166	0.199962	0.311293	YPL277C	Putative protein of unknown function; localized to the membranes; gene expression regulated by copper levels [Source:SGD;Acc:S000006198]
YOL159C	234.174	0.783732	0.173118	4.40659	1.05012e-05	6.08908e-05	CSS3	Protein of unknown function, secreted when constitutively expressed; SWAT-GFP, seamless-GFP and mCherry fusion proteins localize to the cell periphery, SWAT-GFP fusion also localizes to the extracellular region, and mCherry fusion also localizes to the vacuole; deletion mutants are viable and have elevated levels of Ty1 retrotransposition and Ty1 cDNA [Source:SGD;Acc:S000005519]
YHR189W	109.394	-0.141251	0.173033	-0.825183	0.409268	0.537998	PTH1	One of two mitochondrially-localized peptidyl-tRNA hydrolases; dispensable for respiratory growth on rich medium, but required for respiratory growth on minimal medium; see also PTH2 [Source:SGD;Acc:S000001232]
YNL012W	106.272	0.505697	0.173029	2.88686	0.00389106	0.0113378	SPO1	Meiosis-specific prospore protein; required for meiotic spindle pole body duplication and separation; required to produce bending force necessary for proper prospore membrane assembly during sporulation; has similarity to phospholipase B [Source:SGD;Acc:S000004957]
YGR015C	228.608	0.126213	0.172993	0.696071	0.486384	0.611893	YGR015C	Putative protein of unknown function; green fluorescent protein (GFP)-fusion protein localizes to the mitochondrion [Source:SGD;Acc:S000003247]
YLR151C	70.4931	0.0214802	0.172902	0.115282	0.908222	0.941737	PCD1	8-oxo-dGTP diphosphatase; prevents spontaneous mutagenesis via sanitization of oxidized purine nucleoside triphosphates; can also act as peroxisomal pyrophosphatase with specificity for coenzyme A and CoA derivatives, may function to remove potentially toxic oxidized CoA disulfide from peroxisomes to maintain the capacity for beta-oxidation of fatty acids; nudix hydrolase family member; similar E…
YIL080W	5.70974	-0.0279468	0.172823	-0.0587999	0.953112	0.970222	NA	NA
YOR031W	66.9638	0.18572	0.172805	1.06099	0.288694	0.412214	NA	NA
YDR396W	7.19971	-0.0200523	0.172805	-0.0396055	0.968408	0.978827	YDR396W	Dubious open reading frame unlikely to encode a functional protein; extensively overlaps essential NCB2 gene encoding the beta subunit of the NC2 dimeric histone-fold complex [Source:SGD;Acc:S000002804]
YPL241C	166.614	0.369075	0.172802	2.10087	0.0356521	0.0753001	CIN2	GTPase-activating protein (GAP) for Cin4p; tubulin folding factor C involved in beta-tubulin (Tub2p) folding; mutants display increased chromosome loss and benomyl sensitivity; human homolog RP2 complements yeast null mutant [Source:SGD;Acc:S000006162]
YML101C-A	8.06921	0.0368236	0.172778	0.28168	0.778189	0.853691	YML101C-A	Dubious open reading frame; unlikely to encode a functional protein, based on available experimental and comparative sequence data [Source:SGD;Acc:S000004569]
YCR064C	6.11954	0.257875	0.172744	1.32033	0.186725	0.294623	YCR064C	Dubious open reading frame; unlikely to encode a functional protein, based on available experimental and comparative sequence data; partially overlaps the verified gene BUD31 [Source:SGD;Acc:S000000660]
YGR161W-C	188.246	0.357266	0.172528	2.03778	0.0415718	0.0856754	YGR161W-C	Putative protein of unknown function; identified by sequence comparison with hemiascomycetous yeast species [Source:SGD;Acc:S000029726]
YJL163C	86.049	-0.737837	0.172493	-4.38343	1.16827e-05	6.69679e-05	YJL163C	Putative protein of unknown function [Source:SGD;Acc:S000003699]
YJR108W	78.24	0.458483	0.172444	2.62189	0.00874436	0.0228749	ABM1	Protein of unknown function; required for normal microtubule organization [Source:SGD;Acc:S000003869]
YLR120W-A	7.56043	0.208761	0.172226	1.00354	0.315599	0.443673	YLR120W-A	Dubious open reading frame; unlikely to encode a functional protein, based on available experimental and comparative sequence data; partially overlaps the verified ORF YLR121C [Source:SGD;Acc:S000028674]
YIL100W	4.69534	0.0822754	0.172148	0.469508	0.638706	0.74431	YIL100W	Dubious open reading frame; unlikely to encode a functional protein, based on available experimental and comparative sequence data; completely overlaps the dubious ORF YIL100C-A [Source:SGD;Acc:S000001362]
YDR413C	6.70801	0.173797	0.172071	0.890827	0.373022	0.502096	YDR413C	Dubious open reading frame; unlikely to encode a functional protein, based on available experimental and comparative sequence data; overlaps the essential uncharacterized ORF YDR412W that is implicated in rRNA processing [Source:SGD;Acc:S000002821]
YEL008W	9.18813	0.139791	0.172055	0.816928	0.41397	0.542131	YEL008W	Putative protein of unknown function; conserved among S. cerevisiae strains; YEL008W is not an essential gene; predicted to be involved in metabolism [Source:SGD;Acc:S000000734]
tV(AAC)G3	6.60755	0.794433	0.172045	3.3954	0.000685276	0.00251494	tV(AAC)G3	Valine tRNA (tRNA-Val), predicted by tRNAscan-SE analysis [Source:SGD;Acc:S000006757]
YPR076W	4.51481	-0.0606162	0.172026	-0.327451	0.743326	0.830552	YPR076W	Dubious open reading frame; unlikely to encode a functional protein, based on available experimental and comparative sequence data [Source:SGD;Acc:S000006280]
YCR038C	116.971	0.154461	0.172024	0.831615	0.405626	0.534327	BUD5	GTP/GDP exchange factor for Rsr1p (Bud1p); required for both axial and bipolar budding patterns; mutants exhibit random budding in all cell types [Source:SGD;Acc:S000000634]
YLR010C	93.8533	1.09025	0.171976	6.1496	7.76771e-10	9.27703e-09	TEN1	Protein that regulates telomeric length; protects telomeric ends in a complex with Cdc13p and Stn1p; similar to human Ten1 which is critical for the telomeric function of the CST (Cdc13p-Stn1p-Ten1p) complex [Source:SGD;Acc:S000004000]
YJL133C-A	384.514	0.543032	0.171961	3.12451	0.001781	0.00584442	YJL133C-A	Putative protein of unknown function; the authentic, non-tagged protein is detected in highly purified mitochondria in high-throughput studies [Source:SGD;Acc:S000028805]
YML083C	5.97139	-0.157112	0.17194	-0.97344	0.330335	0.459171	YML083C	Protein of unknown function; transcriptionally regulated by Upc2p via an upstream sterol response element; strong increase in transcript abundance during anaerobic growth compared to aerobic growth; cells deleted for YML083C do not exhibit growth defects in anerobic or anaerobic conditions [Source:SGD;Acc:S000004548]
YMR173W	60.9973	0.00449473	0.171815	0.0905577	0.927844	0.953597	DDR48	DNA damage-responsive protein; expression is increased in response to heat-shock stress or treatments that produce DNA lesions; contains multiple repeats of the amino acid sequence NNNDSYGS; protein abundance increases in response to DNA replication stress [Source:SGD;Acc:S000004784]
YGR149W	561.155	0.230027	0.171725	1.30701	0.191211	0.300644	GPC1	Glycerophosphocholine acyltransferase (GPCAT); involved in in phosphatidylcholine (PC) synthesis; uses acetyl-CoA to acylate glycero-3-phosphocholine to yield lyso-PC; also catalyzes acylation of glycerophosphoethanolamine with acyl-CoA; predicted to be an integal membrane protein [Source:SGD;Acc:S000003381]
YIL120W	189.31	0.150644	0.171652	0.855459	0.392297	0.522454	QDR1	Multidrug transporter of the major facilitator superfamily; member of the 12-spanner drug:H(+) antiporter DHA1 family; involved in spore wall assembly; sequence similarity to DTR1 and QDR3, and the triple mutant dtr1 qdr1 qdr3 exhibits reduced dityrosine fluorescence relative to the single mutants; required for resistance to quinidine, ketoconazole, fluconazole, and barban; QDR1 has a paralog, AQ…
YGR144W	65.4243	0.950262	0.171643	5.41812	6.02275e-08	5.25031e-07	THI4	Thiazole synthase; abundant protein involved in the formation of the thiazole moiety of thiamine during thiamine biosynthesis; acts more as a co-substrate rather than an enzyme by providing the sulphur source for thiazole formation; undergoes a single turnover only; required for mitochondrial genome stability in response to DNA damaging agents [Source:SGD;Acc:S000003376]
YHR087W	169.363	0.464129	0.17151	2.61992	0.00879497	0.0229691	RTC3	Protein of unknown function involved in RNA metabolism; has structural similarity to SBDS, the human protein mutated in Shwachman-Diamond Syndrome (the yeast SBDS ortholog = SDO1); null mutation suppresses cdc13-1 temperature sensitivity; protein abundance increases in response to DNA replication stress [Source:SGD;Acc:S000001129]
YER060W-A	119.978	-1.26429	0.171479	-7.45019	9.32065e-14	2.01595e-12	FCY22	Putative purine-cytosine permease; very similar to Fcy2p but cannot substitute for its function [Source:SGD;Acc:S000002958]
YBR004C	1276.43	0.910457	0.171398	5.17526	2.27598e-07	1.82484e-06	GPI18	Functional ortholog of human PIG-V; PIG-V is a mannosyltransferase that transfers the second mannose in glycosylphosphatidylinositol biosynthesis; the authentic, non-tagged protein was localized to mitochondria [Source:SGD;Acc:S000000208]
YDR008C	65.0385	1.30079	0.17137	7.27086	3.57195e-13	7.22888e-12	YDR008C	Dubious open reading frame; unlikely to encode a functional protein, based on available experimental and comparative sequence data; partially overlaps TRP1/YDR007W on opposite strand [Source:SGD;Acc:S000002415]
YOR386W	235.864	-0.136552	0.171341	-0.888915	0.374049	0.502937	PHR1	DNA photolyase involved in photoreactivation; repairs pyrimidine dimers in the presence of visible light; induced by DNA damage; regulated by transcriptional repressor Rph1p [Source:SGD;Acc:S000005913]
YBR020W	126.797	-0.311262	0.171332	-1.85109	0.064156	0.123359	GAL1	Galactokinase; phosphorylates alpha-D-galactose to alpha-D-galactose-1-phosphate in the first step of galactose catabolism; expression regulated by Gal4p; human homolog GALK2 complements yeast null mutant; GAL1 has a paralog, GAL3, that arose from the whole genome duplication [Source:SGD;Acc:S000000224]
YBR040W	6.0228	-0.293274	0.171322	-1.36791	0.17134	0.275246	FIG1	Integral membrane protein required for efficient mating; may participate in or regulate the low affinity Ca2+ influx system, which affects intracellular signaling and cell-cell fusion during mating [Source:SGD;Acc:S000000244]
YJL164C	160.471	-0.295471	0.171169	-1.75923	0.078538	0.145473	TPK1	cAMP-dependent protein kinase catalytic subunit; promotes vegetative growth in response to nutrients via the Ras-cAMP signaling pathway; inhibited by regulatory subunit Bcy1p in the absence of cAMP; phosphorylates and inhibits Whi3p to promote G1/S phase passage; partially redundant with Tpk2p and Tpk3p; phosphorylates pre-Tom40p, which impairs its import into mitochondria under non-respiratory c…
YNL195C	55.8435	0.804673	0.17115	4.66842	3.0353e-06	1.98176e-05	YNL195C	Protein of unknown function; shares a promoter with YNL194C; the authentic, non-tagged protein is detected in highly purified mitochondria in high-throughput studies; YNL195C has a paralog, HBT1, that arose from the whole genome duplication [Source:SGD;Acc:S000005139]
YDR067C	258.815	0.422983	0.171094	2.44097	0.0146479	0.0354729	OCA6	Cytoplasmic protein required for replication of Brome mosaic virus; S. cerevisiae is a model system for studying positive-strand RNA virus replication; null mutation confers sensitivity to tunicamycin and DTT [Source:SGD;Acc:S000002474]
YOL153C	86.5256	-0.363266	0.17108	-2.13955	0.0323915	0.0694857	NA	NA
YLR317W	76.1896	0.659818	0.170937	3.80125	0.000143966	0.000625774	YLR317W	Dubious open reading frame; unlikely to encode a functional protein, based on available experimental and comparative sequence data; may be part of a bicistronic transcript with NKP2/YLR315W; overlaps the verified ORF TAD3/YLR316C [Source:SGD;Acc:S000004309]
YPL166W	108.946	0.0344478	0.170896	0.215212	0.829602	0.891504	ATG29	Autophagy-specific protein; required for recruiting other ATG proteins to the pre-autophagosomal structure (PAS); interacts with Atg17p and localizas to the PAS in a manner interdependent with Atg17p and Cis1p; not conserved; relocalizes from nucleus to cytoplasmic foci upon DNA replication stress [Source:SGD;Acc:S000006087]
YLR037C	54.1975	0.0710735	0.170887	0.409288	0.682328	0.781826	PAU23	Cell wall mannoprotein; has similarity to Tir1p, Tir2p, Tir3p, and Tir4p; member of the seripauperin multigene family encoded mainly in subtelomeric regions; expressed under anaerobic conditions, completely repressed during aerobic growth [Source:SGD;Acc:S000004027]
YDR374C	5.58547	0.175199	0.170844	0.925943	0.354476	0.484489	PHO92	Posttranscriptional regulator of phosphate metabolism; facilitates PHO4 mRNA degradation by interacting with Pop2p; regulates PHO4 mRNA stability by binding to PHO4's 3'UTR in a phosphate-dependent manner; contains highly conserved YTH (YT521-B Homology) domain that exhibits RNA-binding activity; human homolog YTHDF2 can complement yeast null mutant [Source:SGD;Acc:S000002782]
YER067W	175.554	-0.129405	0.170766	-1.06487	0.286935	0.410075	RGI1	Protein of unknown function; involved in energy metabolism under respiratory conditions; protein abundance is increased upon intracellular iron depletion or in response to DNA replication stress; RGI1 has a paralog, RGI2, that arose from the whole genome duplication [Source:SGD;Acc:S000000869]
YLL005C	9.69411	-0.273816	0.170687	-1.94618	0.0516328	0.103004	SPO75	Meiosis-specific protein of unknown function; required for spore wall formation during sporulation; dispensable for both nuclear divisions during meiosis [Source:SGD;Acc:S000003928]
tI(AAU)G	4.49826	0.499425	0.170684	2.16124	0.0306769	0.0664419	tI(AAU)G	Isoleucine tRNA (tRNA-Ile), predicted by tRNAscan-SE analysis [Source:SGD;Acc:S000006604]
YNL070W	896.158	-0.345512	0.170644	-2.02542	0.0428246	0.0877493	TOM7	Component of the TOM (translocase of outer membrane) complex; responsible for recognition and initial import steps for all mitochondrially directed proteins; promotes assembly and stability of the TOM complex [Source:SGD;Acc:S000005014]
YKR104W	95.5234	0.115392	0.170544	0.676963	0.49843	0.624177	YKR104W	Putative transporter of the MRP subfamily; contains a stop codon in S288C; adjacent ORFs YKR103W and YKR104W are merged in different strain backgrounds; MRP stands for multidrug resistance-associated protein [Source:SGD;Acc:S000001812]
YOR289W	80.7423	1.32667	0.170527	7.53717	4.80274e-14	1.07193e-12	YOR289W	Putative protein of unknown function; transcription induced by the unfolded protein response; green fluorescent protein (GFP)-fusion protein localizes to both the cytoplasm and the nucleus [Source:SGD;Acc:S000005815]
YEL067C	65.0763	-0.0415511	0.170434	-0.23764	0.81216	0.879212	YEL067C	Putative protein of unknown function; the authentic, non-tagged protein is detected in highly purified mitochondria in high-throughput studies [Source:SGD;Acc:S000000793]
YOL157C	98.3422	0.152963	0.170428	0.911579	0.36199	0.491982	IMA2	Isomaltase (alpha-1,6-glucosidase/alpha-methylglucosidase); preferred specificity for isomaltose, alpha-methylglucoside, and palatinose, but also exhibits alpha-1,2 glucosidase activity on sucrose and kojibiose, and can cleave the 1,3-alpha linkage of nigerose and turanose and the alpha-1,5 linkage of leucrose in vitro; not required for isomaltose utilization, but Ima2p overexpression allows the …
YML122C	5.65034	0.110761	0.170294	0.429046	0.66789	0.770049	YML122C	Putative protein of unknown function; conserved among S. cerevisiae strains; YML122C is not an essential gene [Source:SGD;Acc:S000004591]
YER079W	114.705	-0.219737	0.170175	-1.36104	0.1735	0.277936	YER079W	Putative protein of unknown function [Source:SGD;Acc:S000000881]
YKR004C	180.793	0.294359	0.170136	1.71478	0.0863862	0.157098	ECM9	Non-essential protein of unknown function [Source:SGD;Acc:S000001712]
YKL202W	6.78451	0.317578	0.170076	1.74524	0.0809425	0.148876	YKL202W	Dubious open reading frame; unlikely to encode a functional protein, based on available experimental and comparative sequence data [Source:SGD;Acc:S000001685]
snR55	7.44189	0.235104	0.169986	0.967562	0.333263	0.462589	snR55	C/D box small nucleolar RNA (snoRNA); predicted to guide 2'-O-methylation of small subunit (SSU) rRNA at position U1269 [Source:SGD;Acc:S000006446]
YIL014C-A	150.832	0.960595	0.169972	5.55533	2.77092e-08	2.55721e-07	YIL014C-A	Putative protein of unknown function [Source:SGD;Acc:S000003536]
YEL039C	70.9643	1.9857	0.169892	10.9298	8.30693e-28	1.02517e-25	CYC7	Cytochrome c isoform 2, expressed under hypoxic conditions; also known as iso-2-cytochrome c; electron carrier of the mitochondrial intermembrane space that transfers electrons from ubiquinone-cytochrome c oxidoreductase to cytochrome c oxidase during cellular respiration; protein abundance increases in response to DNA replication stress; CYC7 has a paralog, CYC1, that arose from the whole genome…
YIL029C	114.854	0.983685	0.169821	5.64063	1.6943e-08	1.61575e-07	YIL029C	Putative protein of unknown function; deletion confers sensitivity to 4-(N-(S-glutathionylacetyl)amino) phenylarsenoxide (GSAO); YIL029C has a paralog, YPR071W, that arose from a single-locus duplication [Source:SGD;Acc:S000001291]
YOR368W	189.972	0.340182	0.16979	1.9748	0.0482904	0.0975416	RAD17	Checkpoint protein; involved in the activation of the DNA damage and meiotic pachytene checkpoints; with Mec3p and Ddc1p, forms a clamp that is loaded onto partial duplex DNA; homolog of human and S. pombe Rad1 and U. maydis Rec1 proteins [Source:SGD;Acc:S000005895]
YHL043W	6.21476	-0.130622	0.169764	-0.75866	0.448056	0.576701	ECM34	Protein of unknown function; member of the DUP380 subfamily of conserved, often subtelomerically-encoded proteins; SWAT-GFP, seamless-GFP and mCherry C-terminal fusion proteins localize to the cytosol [Source:SGD;Acc:S000001035]
YOR338W	747.276	1.61534	0.169741	9.30729	1.31133e-20	6.34887e-19	YOR338W	Putative protein of unknown function; YOR338W transcription is regulated by Azf1p and its transcript is a specific target of the G protein effector Scp160p; identified as being required for sporulation in a high-throughput mutant screen; YOR338W has a paralog, FUN19, that arose from the whole genome duplication [Source:SGD;Acc:S000005865]
YKR041W	91.7329	0.148195	0.169718	0.858109	0.390832	0.521165	YKR041W	Protein of unknown function; localizes to the mitotic spindle; overexpression of YKR041W affects endocytic protein trafficking [Source:SGD;Acc:S000001749]
snR17b	76.9704	1.11612	0.169694	6.34211	2.26638e-10	2.97799e-09	snR17b	Small nucleolar RNA (snoRNA) U3; part of small (ribosomal) subunit (SSU) processosome; SNR17A also encodes snoRNA U3 [Source:SGD;Acc:S000007441]
snR68	95.1455	0.408008	0.169653	2.33498	0.0195445	0.0452087	snR68	C/D box small nucleolar RNA (snoRNA); guides 2'-O-methylation of large subunit (LSU) rRNA at position A2640 [Source:SGD;Acc:S000006459]
YLL009C	219.514	-0.19925	0.16964	-1.18789	0.234878	0.351563	COX17	Copper metallochaperone that transfers copper to Sco1p and Cox11p; eventual delivery to cytochrome c oxidase; contains twin cysteine-x9-cysteine motifs; interacts with the MICOS complex, and interaction is promoted by copper ions; human homolog COX17 partially complements yeast null mutant [Source:SGD;Acc:S000003932]
YOR015W	74.5806	-0.34959	0.169638	-2.05162	0.040207	0.0833815	YOR015W	Putative protein of unknown function; conserved among S. cerevisiae strains; YOR015W is not an essential gene [Source:SGD;Acc:S000005541]
YKR011C	250.177	-0.0177598	0.169616	-0.065879	0.947474	0.966829	YKR011C	Protein of unknown function; green fluorescent protein (GFP)-fusion protein localizes to the nucleus; protein abundance increases in response to DNA replication stress [Source:SGD;Acc:S000001719]
YLR377C	14.4823	0.421728	0.169601	1.68525	0.0919395	0.16576	FBP1	Fructose-1,6-bisphosphatase; key regulatory enzyme in the gluconeogenesis pathway, required for glucose metabolism; undergoes either proteasome-mediated or autophagy-mediated degradation depending on growth conditions; glucose starvation results in redistribution to the periplasm; interacts with Vid30p [Source:SGD;Acc:S000004369]
YLL053C	108.319	-0.954203	0.169569	-5.66289	1.48847e-08	1.43248e-07	YLL053C	Putative protein; in the Sigma 1278B strain background YLL053C is contiguous with AQY2 which encodes an aquaporin [Source:SGD;Acc:S000003976]
YOR009W	311.127	0.042549	0.169471	0.261613	0.79362	0.864245	TIR4	Cell wall mannoprotein; expressed under anaerobic conditions and required for anaerobic growth; transcription is also induced by cold shock; member of the Srp1p/Tip1p family of serine-alanine-rich proteins [Source:SGD;Acc:S000005535]
YCL001W-B	5.90631	0.341391	0.169402	2.03963	0.0413876	0.0853797	YCL001W-B	Putative protein of unknown function; present in a region duplicated between chromosomes XIV and III; YCL001W-B has a paralog, DOM34, that arose from the whole genome duplication [Source:SGD;Acc:S000007596]
YDL219W	543.823	0.162205	0.169335	0.94742	0.343425	0.472876	DTD1	D-Tyr-tRNA(Tyr) deacylase; functions in protein translation, may affect nonsense suppression via alteration of the protein synthesis machinery; ubiquitous among eukaryotes [Source:SGD;Acc:S000002378]
YFL012W-A	5.89435	-0.0450238	0.169273	-0.278188	0.780868	0.855061	YFL012W-A	Dubious open reading frame; unlikely to encode a functional protein, based on available experimental and comparative sequence data; overlaps the verified gene IES1/YFL013C [Source:SGD;Acc:S000002964]
YKL097C	4.81331	0.200036	0.169193	1.30623	0.191474	0.300833	YKL097C	Putative protein of unknown function; conserved across S. cerevisiae strains; not conserved in closely related Saccharomyces species [Source:SGD;Acc:S000001580]
YFR012W-A	5.56943	0.194997	0.169183	0.891248	0.372796	0.501919	YFR012W-A	Putative protein of unknown function; identified by homology [Source:SGD;Acc:S000007606]
YFR054C	6.82433	-0.142508	0.169177	-1.01857	0.308405	0.43609	YFR054C	Putative protein of unknown function; conserved among S. cerevisiae strains [Source:SGD;Acc:S000001950]
YPR061C	96.8177	0.714678	0.169078	4.09979	4.13518e-05	0.000207882	JID1	Probable Hsp40p co-chaperone; has a DnaJ-like domain and appears to be involved in ER-associated degradation of misfolded proteins containing a tightly folded cytoplasmic domain; inhibits replication of Brome mosaic virus in S. cerevisiae [Source:SGD;Acc:S000006265]
YIR028W	66.8706	-0.137549	0.168982	-0.822658	0.410702	0.53932	DAL4	Allantoin permease; expression sensitive to nitrogen catabolite repression and induced by allophanate, an intermediate in allantoin degradation [Source:SGD;Acc:S000001467]
YJL120W	5.42001	-0.328783	0.168932	-1.91934	0.0549407	0.108673	YJL120W	Dubious open reading frame; unlikely to encode a functional protein, based on available experimental and comparative sequence data; partially overlaps the verified gene YJL121C/RPE1; deletion confers sensitivity to GSAO [Source:SGD;Acc:S000003656]
YAR023C	83.8275	0.116424	0.16889	0.683229	0.494462	0.620073	YAR023C	Putative integral membrane protein; member of DUP240 gene family [Source:SGD;Acc:S000000074]
YFL060C	79.0857	0.21446	0.168795	1.28108	0.200164	0.311532	SNO3	Protein of unknown function; nearly identical to Sno2p; expression is induced before the diauxic shift and also in the absence of thiamin [Source:SGD;Acc:S000001834]
YPL248C	103.457	-0.652075	0.16878	-3.94411	8.00962e-05	0.000375373	GAL4	DNA-binding transcription factor required for activating GAL genes; responds to galactose; repressed by Gal80p and activated by Gal3p [Source:SGD;Acc:S000006169]
YOR053W	6.09326	-0.00907059	0.168626	0.0165331	0.986809	0.990586	YOR053W	Dubious open reading frame; unlikely to encode a functional protein, based on available experimental and comparative sequence data; partially overlaps the verified gene VHS3/YOR054C [Source:SGD;Acc:S000005579]
YIL152W	117.772	0.0838538	0.168544	0.502966	0.614988	0.72465	YIL152W	Putative protein of unknown function [Source:SGD;Acc:S000001414]
YDR534C	114.592	-0.0519461	0.168487	-0.305963	0.759633	0.842791	FIT1	Mannoprotein that is incorporated into the cell wall; incorporated via a glycosylphosphatidylinositol (GPI) anchor; involved in the retention of siderophore-iron in the cell wall [Source:SGD;Acc:S000002942]
YOR012W	5.70616	0.119304	0.168484	0.744928	0.456315	0.584938	YOR012W	Putative protein of unknown function [Source:SGD;Acc:S000005538]
YPR002C-A	8.59116	0.328667	0.168391	1.51381	0.130074	0.220644	YPR002C-A	Dubious open reading frame; unlikely to encode a functional protein, based on available experimental and comparative sequence data; completely overlaps the Ty1 long terminal repeat, YPRWdelta12 [Source:SGD;Acc:S000007254]
YLR080W	75.4164	-0.0904314	0.16837	-0.500699	0.616583	0.726056	EMP46	Integral membrane component of ER-derived COPII-coated vesicles; functions in ER to Golgi transport; EMP46 has a paralog, EMP47, that arose from the whole genome duplication [Source:SGD;Acc:S000004070]
YER104W	165.137	0.164436	0.16831	0.973774	0.330169	0.459042	RTT105	Protein with a role in regulation of Ty1 transposition [Source:SGD;Acc:S000000906]
YFL059W	131.702	-0.42416	0.168309	-2.5878	0.00965916	0.0248142	SNZ3	Member of a stationary phase-induced gene family; expressed in the presence of galactose; transcription of SNZ3 is induced prior to diauxic shift, and also in the absence of thiamin in a Thi2p-dependent manner; forms a coregulated gene pair with SNO3 [Source:SGD;Acc:S000001835]
LSR1	137.436	0.781959	0.168307	4.54879	5.39561e-06	3.30672e-05	LSR1	U2 spliceosomal RNA (U2 snRNA), component of the spliceosome; pairs with the branchpoint sequence; functionally equivalent to mammalian U2 snRNA; stress-induced pseudouridylations at positions 56 and 93 may contribute to regulation of splicing [Source:SGD;Acc:S000006478]
YKR053C	111.036	0.022498	0.168293	0.173828	0.862001	0.911536	YSR3	Dihydrosphingosine 1-phosphate phosphatase; membrane protein involved in sphingolipid metabolism; YSR3 has a paralog, LCB3, that arose from the whole genome duplication [Source:SGD;Acc:S000001761]
YMR085W	147.438	-1.17721	0.168232	-7.20633	5.74808e-13	1.12355e-11	YMR085W	Putative protein of unknown function; YMR085W and adjacent ORF YMR084W are merged in related strains, and together are paralogous to glutamine-fructose-6-phosphate amidotransferase GFA1 [Source:SGD;Acc:S000004690]
YJL113W	118.822	0.365475	0.168227	2.15372	0.0312623	0.0674341	YJL113W	Retrotransposon TYA Gag and TYB Pol genes; transcribed/translated as one unit; polyprotein is processed to make a nucleocapsid-like protein (Gag), reverse transcriptase (RT), protease (PR), and integrase (IN); similar to retroviral genes [Source:SGD;Acc:S000003649]
YIL132C	85.6013	-0.228641	0.1681	-1.39203	0.163912	0.26658	CSM2	Component of Shu complex (aka PCSS complex); Shu complex also includes Psy3, Shu1, Shu2, and promotes error-free DNA repair,; Shu complex mediates inhibition of Srs2p function; promotes formation of Rad51p filaments; Psy3p and Csm2p contain similar DNA-binding regions which work together to form a single DNA binding site; required for accurate chromosome segregation during meiosis [Source:SGD;Acc…
YKL050C	133.503	-0.16633	0.168094	-1.00222	0.316238	0.444386	YKL050C	Protein of unknown function; the YKL050W protein is a target of the SCFCdc4 ubiquitin ligase complex and YKL050W transcription is regulated by Azf1p; YKL050C has a paralog, EIS1, that arose from the whole genome duplication [Source:SGD;Acc:S000001533]
YBR284W	94.6876	0.219956	0.168074	1.29757	0.194435	0.304573	YBR284W	Putative metallo-dependent hydrolase superfamily protein; similar to AMP deaminases but lacks key catalytic residues and does not rescue purine nucleotide metabolic defect of quadruple aah1 ade8 amd1 his1 mutant; null mutant exhibits longer telomeres, altered Ty mobility, decreased resistance to rapamycin and wortmannin; induced in response to hydrostatic pressure; not an essential gene; YBR284W …
YGR153W	83.5532	-0.0888064	0.16807	-0.515694	0.606068	0.716759	YGR153W	Putative protein of unknown function [Source:SGD;Acc:S000003385]
YKL055C	66.9766	0.20531	0.168048	1.21481	0.224438	0.339978	OAR1	Mitochondrial 3-oxoacyl-[acyl-carrier-protein] reductase; may comprise a type II mitochondrial fatty acid synthase along with Mct1p; human homolog CBR4 complements yeast null mutant [Source:SGD;Acc:S000001538]
YLR174W	93.2861	1.05603	0.168026	6.20512	5.46555e-10	6.70568e-09	IDP2	Cytosolic NADP-specific isocitrate dehydrogenase; catalyzes oxidation of isocitrate to alpha-ketoglutarate; levels are elevated during growth on non-fermentable carbon sources and reduced during growth on glucose; IDP2 has a paralog, IDP3, that arose from the whole genome duplication [Source:SGD;Acc:S000004164]
YIL011W	296.81	-1.14552	0.167997	-6.94556	3.7697e-12	6.62751e-11	TIR3	Cell wall mannoprotein; member of Srp1p/Tip1p family of serine-alanine-rich proteins; expressed under anaerobic conditions and required for anaerobic growth; TIR3 has a paralog, TIR2, that arose from the whole genome duplication [Source:SGD;Acc:S000001273]
YFR015C	155.214	-1.03487	0.167954	-6.17689	6.5376e-10	7.92705e-09	GSY1	Glycogen synthase; expression induced by glucose limitation, nitrogen starvation, environmental stress, and entry into stationary phase; GSY1 has a paralog, GSY2, that arose from the whole genome duplication; relocalizes from nucleus to cytoplasmic foci upon DNA replication stress [Source:SGD;Acc:S000001911]
YLR119W	115.991	0.283153	0.167924	1.66061	0.096791	0.172971	SRN2	Component of the ESCRT-I complex; ESCRT-I is involved in ubiquitin-dependent sorting of proteins into the endosome; suppressor of rna1-1 mutation; may be involved in RNA export from nucleus [Source:SGD;Acc:S000004109]
21S_rRNA	5.95104	0.127721	0.16788	0.476991	0.633369	0.740283	NA	NA
YAL047W-A	5.2927	0.0700411	0.167878	0.327276	0.743459	0.830553	YAL047W-A	Dubious open reading frame; unlikely to encode a functional protein, based on available experimental and comparative sequence data; partially overlaps ORF GEM1/YAL048C [Source:SGD;Acc:S000028733]
YBR184W	72.5426	1.1487	0.167834	6.62538	3.46349e-11	5.27826e-10	YBR184W	Putative protein of unknown function; YBR184W is not an essential gene [Source:SGD;Acc:S000000388]
YML091C	909.94	0.0384542	0.16783	0.197859	0.843155	0.899255	RPM2	Protein subunit of mitochondrial RNase P; has roles in nuclear transcription, cytoplasmic and mitochondrial RNA processing, and mitochondrial translation; distributed to mitochondria, cytoplasmic processing bodies, and the nucleus [Source:SGD;Acc:S000004556]
YGR045C	4.82492	0.36331	0.167808	1.79151	0.0732111	0.137673	YGR045C	Putative protein of unknown function; conserved across S. cerevisiae strains [Source:SGD;Acc:S000003277]
YJR159W	7.48502	-0.106924	0.167793	-0.791532	0.428634	0.557596	SOR1	Sorbitol dehydrogenase; protein sequence is 99% identical to the Sor2p sorbitol dehydrogenase; expression is induced in the presence of sorbitol or xylose [Source:SGD;Acc:S000003920]
YOR390W	164.86	0.0943133	0.167726	0.56128	0.574607	0.690845	FEX1	Protein involved in fluoride export; nearly identical to FEX2, and deletion of both proteins results in a large increase in fluoride sensitivity compared with the single mutant; contains two FEX domains connected by a linker; part of a widespread family of conserved fluoride export proteins [Source:SGD;Acc:S000005917]
YKL026C	106.747	0.674959	0.167598	3.97092	7.15949e-05	0.000339833	GPX1	Phospholipid hydroperoxide glutathione peroxidase; induced by glucose starvation that protects cells from phospholipid hydroperoxides and nonphospholipid peroxides during oxidative stress; GPX1 has a paralog, HYR1, that arose from the whole genome duplication [Source:SGD;Acc:S000001509]
YOL044W	235.579	0.114508	0.1675	0.667978	0.504148	0.629335	PEX15	Tail-anchored type II integral peroxisomal membrane protein; required for peroxisome biogenesis; cells lacking Pex15p mislocalize peroxisomal matrix proteins to cytosol; overexpression results in impaired peroxisome assembly [Source:SGD;Acc:S000005404]
YDR066C	97.9293	0.436044	0.167434	2.54529	0.0109186	0.0275106	RTR2	Protein of unknown function; exhibits genetic interactions with Rtr1p; green fluorescent protein (GFP)-fusion protein localizes to the cytoplasm; YDR066C is not an essential gene; relocalizes from nucleus to cytoplasmic foci upon DNA replication stress; RTR2 has a paralog, RTR1, that arose from the whole genome duplication [Source:SGD;Acc:S000002473]
YLR296W	5.89093	0.198788	0.167424	1.15212	0.24927	0.368288	YLR296W	Putative protein of unknown function; conserved across S. cerevisiae strains [Source:SGD;Acc:S000004287]
YNR075W	727.438	0.0627778	0.167402	0.281903	0.778018	0.853691	COS10	Endosomal protein involved in turnover of plasma membrane proteins; member of the DUP380 subfamily of conserved, often subtelomeric COS genes; required for the multivesicular vesicle body sorting pathway that internalizes plasma membrane proteins for degradation; Cos proteins provide ubiquitin in trans for nonubiquitinated cargo proteins [Source:SGD;Acc:S000005358]
YOL024W	6.7924	-0.0930766	0.167302	-0.72147	0.470621	0.597556	YOL024W	Putative protein of unknown function; predicted to have thiol-disulfide oxidoreductase active site; YOL024W has a paralog, IGD1, that arose from the whole genome duplication [Source:SGD;Acc:S000005384]
YER062C	636.26	1.41804	0.167028	8.2902	1.13056e-16	3.59381e-15	YER062C	DL-glycerol-3-phosphate phosphatase involved in glycerol biosynthesis; also known as glycerol-1-phosphatase; induced in response to hyperosmotic or oxidative stress, and during diauxic shift; GPP2 has a paralog, GPP1, that arose from the whole genome duplication [Source:SGD;Acc:S000000864]
YPL230W	75.1695	0.494972	0.167005	2.86522	0.00416723	0.0120204	USV1	Putative transcription factor containing a C2H2 zinc finger; mutation affects transcriptional regulation of genes involved in growth on non-fermentable carbon sources, response to salt stress and cell wall biosynthesis; USV1 has a paralog, RGM1, that arose from the whole genome duplication [Source:SGD;Acc:S000006151]
YOR077W	119.46	-0.136668	0.166896	-0.81679	0.414049	0.542131	RTS2	Basic zinc-finger protein; similar to human and mouse Kin17 proteins which are chromatin-associated proteins involved in UV response and DNA replication [Source:SGD;Acc:S000005603]
YNL196C	4.82649	0.186633	0.16684	1.11143	0.266383	0.387477	SLZ1	Sporulation-specific protein with a leucine zipper motif; subunit of the MIS complex which controls mRNA methylation during during the induction of sporulation [Source:SGD;Acc:S000005140]
YCR045C	6.12693	0.100505	0.166748	0.637856	0.523567	0.646354	RRT12	Probable subtilisin-family protease; role in formation of the dityrosine layer of spore walls; localizes to the spore wall and also the nuclear envelope and ER region in mature spores [Source:SGD;Acc:S000000641]
YOR072W-A	6.5042	0.0480309	0.166742	0.081086	0.935374	0.95942	YOR072W-A	Dubious open reading frame; unlikely to encode a functional protein, based on available experimental and comparative sequence data; partially overlaps the uncharacterized ORF YOR072W; originally identified by fungal homology and RT-PCR [Source:SGD;Acc:S000028582]
YHR048W	304.446	0.272532	0.166741	1.65204	0.0985257	0.175398	YHK8	Presumed antiporter of the major facilitator superfamily; member of the 12-spanner drug:H(+) antiporter DHA1 family; expression of gene is up-regulated in cells exhibiting reduced susceptibility to azoles [Source:SGD;Acc:S000001090]
YGL010W	147.731	0.107816	0.166723	0.631157	0.527938	0.649246	MPO1	Protein involved in metabolism of phytosphingosine; not an essential gene [Source:SGD;Acc:S000002978]
YHL044W	108.267	0.592541	0.166686	3.45772	0.000544774	0.00205195	YHL044W	Putative integral membrane protein; member of DUP240 gene family; green fluorescent protein (GFP)-fusion protein localizes to the plasma membrane in a punctate pattern [Source:SGD;Acc:S000001036]
YLR466C-B	6.43757	0.032345	0.166675	0.170353	0.864732	0.913613	YLR466C-B	Dubious open reading frame; unlikely to encode a functional protein, based on available experimental and comparative sequence data [Source:SGD;Acc:S000028686]
YOR062C	136.512	0.746085	0.166589	4.3244	1.52951e-05	8.5389e-05	YOR062C	Protein of unknown function; similar to Reg1p; expression regulated by glucose and Rgt1p; GFP-fusion protein is induced in response to the DNA-damaging agent MMS; YOR062C has a paralog, YKR075C, that arose from the whole genome duplication [Source:SGD;Acc:S000005588]
YBL091C-A	103.789	0.222148	0.166561	1.3381	0.180863	0.286667	SCS22	Protein involved in regulation of phospholipid metabolism; one of 6 proteins (Ist2p, Scs2p, Scs22p, Tcb1p, Tcb2p, Tcb3p) that connect the ER and plasma membrane (PM); regulates PM PI4P levels by controlling access of the Sac1p phosphatase to its substrate, PI4P; human VAP homolog; similar to D. melanogaster inturned protein; SWAT-GFP and mCherry fusion proteins localize to the cytosol; SCS22 has …
YNL328C	78.1011	-0.105094	0.166549	-0.633698	0.526278	0.648218	MDJ2	Constituent of the mitochondrial import motor; associated with the presequence translocase; function overlaps with that of Pam18p; stimulates the ATPase activity of Ssc1p to drive mitochondrial import; contains a J domain [Source:SGD;Acc:S000005272]
YDR250C	4.9858	-0.317124	0.166529	-1.75305	0.0795927	0.14691	YDR250C	Dubious open reading frame; unlikely to encode a functional protein, based on available experimental and comparative sequence data [Source:SGD;Acc:S000002658]
tK(UUU)D	4.43363	-0.122392	0.166523	-0.749077	0.453811	0.582531	tK(UUU)D	Lysine tRNA (tRNA-Lys), predicted by tRNAscan-SE analysis; thiolation of uridine at wobble position (34) requires Ncs6p [Source:SGD;Acc:S000006629]
YIL024C	94.2639	0.620097	0.166512	3.69483	0.000220032	0.000914718	YIL024C	Putative protein of unknown function; non-essential gene; expression directly regulated by the metabolic and meiotic transcriptional regulator Ume6p [Source:SGD;Acc:S000001286]
YAR031W	71.7171	-0.498488	0.166479	-3.01946	0.00253223	0.00783573	PRM9	Pheromone-regulated protein; contains 3 predicted transmembrane segments and an FF sequence, a motif involved in COPII binding; member of DUP240 gene family; PRM9 has a paralog, PRM8, that arose from a segmental duplication [Source:SGD;Acc:S000000078]
YLR339C	5.4884	0.0235072	0.16646	0.0475944	0.962039	0.975367	YLR339C	Dubious open reading frame; unlikely to encode a functional protein, based on available experimental and comparative sequence data; partially overlaps the essential gene RPP0 [Source:SGD;Acc:S000004331]
YDR180W	462.19	-0.144673	0.166425	-0.862288	0.388529	0.519193	SCC2	Subunit of cohesin loading factor (Scc2p-Scc4p); a complex required for loading of cohesin complexes onto chromosomes; involved in establishing sister chromatid cohesion during DSB repair via histone H2AX; promotes gene expression program that supports translational fidelity; evolutionarily-conserved adherin; relocalizes to cytosol in response to hypoxia; human disorder Cornelia de Lange syndrome…
YNR060W	817.423	-1.44307	0.166404	-8.90744	5.22248e-19	2.01658e-17	FRE4	Ferric reductase; reduces a specific subset of siderophore-bound iron prior to uptake by transporters; expression induced by low iron levels [Source:SGD;Acc:S000005343]
YGR098C	526.96	0.114436	0.166395	0.687684	0.491652	0.617163	ESP1	Separase, a caspase-like cysteine protease; promotes sister chromatid separation by mediating dissociation of the cohesin Scc1p from chromatin; inhibits protein phosphatase 2A-Cdc55p to promote mitotic exit; inhibited by Pds1p; relative distribution to the nucleus increases upon DNA replication stress [Source:SGD;Acc:S000003330]
YDR449C	1168.18	-0.0415476	0.166337	-0.250071	0.802532	0.872037	UTP6	Nucleolar protein; component of the small subunit (SSU) processome containing the U3 snoRNA that is involved in processing of pre-18S rRNA [Source:SGD;Acc:S000002857]
YDR403W	118.979	0.286205	0.166332	1.68679	0.0916434	0.165476	DIT1	Sporulation-specific enzyme required for spore wall maturation; involved in the production of a soluble LL-dityrosine-containing precursor of the spore wall; transcripts accumulate at the time of prospore enclosure [Source:SGD;Acc:S000002811]
YJR118C	671.972	0.0635021	0.166302	0.390898	0.695872	0.793734	ILM1	Protein of unknown function; may be involved in mitochondrial DNA maintenance; required for slowed DNA synthesis-induced filamentous growth [Source:SGD;Acc:S000003879]
YFL019C	6.35479	0.155094	0.166288	1.05455	0.291632	0.415962	YFL019C	Putative protein of unknown function; conserved across S. cerevisiae strains; YFL019C is not an essential gene [Source:SGD;Acc:S000001875]
YLR122C	7.78248	0.293657	0.166212	1.46679	0.142433	0.237162	YLR122C	Putative protein of unknown function; conserved among S. cerevisiae strains; partially overlaps dubious ORF YLR123C [Source:SGD;Acc:S000004112]
YKR076W	164.458	0.0300398	0.166211	0.147363	0.882845	0.924872	ECM4	S-glutathionyl-(chloro)hydroquinone reductase (GS-HQR); glutathione transferase involved in cell-surface biosynthesis and architecture; catalyzes glutathione (GSH)-dependent reduction of GS-trichloro-p-hydroquinone to trichloro-p-hydroquinone; expression upregulated upon exposure to genotoxic agents, such as methyl methanesulfonate, cisplatin and bleomycin; not an essential gene; similar to YGR15…
snR85	5.26198	0.0305674	0.166206	0.260941	0.794138	0.864577	snR85	H/ACA box small nucleolar RNA (snoRNA); predicted to guide pseudouridylation of small subunit (SSU) rRNA at position U1181 [Source:SGD;Acc:S000081376]
YPL265W	657.428	0.541468	0.16616	3.17512	0.00149774	0.00501423	DIP5	Dicarboxylic amino acid permease; mediates high-affinity and high-capacity transport of L-glutamate and L-aspartate; also a transporter for Gln, Asn, Ser, Ala, and Gly; relocalizes from plasma membrane to vacuole upon DNA replication stress [Source:SGD;Acc:S000006186]
YHR035W	122.912	-0.402301	0.166086	-2.45194	0.0142087	0.0345554	NEL1	Activator of Sar1p GTPase activity; paralog of Sec23 but does not associate with the COPII components; not an essential gene [Source:SGD;Acc:S000001077]
YEL030C-A	5.23525	0.106548	0.166049	0.548555	0.583311	0.697977	YEL030C-A	Protein of unknown function; identified by gene-trapping, microarray-based expression analysis, and genome-wide homology searching [Source:SGD;Acc:S000028619]
YDL107W	222.83	0.00317977	0.166002	0.0294525	0.976504	0.984166	MSS2	Peripherally bound inner membrane protein of the mitochondrial matrix; involved in membrane insertion of C-terminus of Cox2p, interacts genetically and physically with Cox18p [Source:SGD;Acc:S000002265]
YBL070C	4.49215	0.0937626	0.165997	0.519112	0.603682	0.715417	YBL070C	Dubious open reading frame; unlikely to encode a functional protein, based on available experimental and comparative sequence data [Source:SGD;Acc:S000000166]
YGL184C	65.8648	-0.196997	0.165967	-1.20222	0.229278	0.345069	STR3	Peroxisomal cystathionine beta-lyase; converts cystathionine into homocysteine; may be redox regulated by Gto1p; involved in the release of the aromatic thiol 3-mercaptohexanol during wine fermentation [Source:SGD;Acc:S000003152]
YNL130C-A	5.50618	-0.0816243	0.16596	-0.533542	0.593659	0.706999	DGR1	Protein of unknown function; dgr1 null mutant is resistant to 2-deoxy-D-glucose [Source:SGD;Acc:S000028579]
YDR031W	171.434	0.717141	0.165951	4.26706	1.98062e-05	0.000107931	MIX14	Mitochondrial intermembrane space protein of unknown function; required for normal oxygen consumption; contains twin cysteine-x9-cysteine motifs; protein abundance increases in response to DNA replication stress [Source:SGD;Acc:S000002438]
YGR146C	484.525	-0.44316	0.165948	-2.67058	0.00757197	0.0201343	ECL1	Protein of unknown function; mitochondrial-dependent role in the extension of chronological lifespan; overexpression increases oxygen consumption and respiratory activity while deletion results in reduced oxygen consumption under conditions of caloric restriction; induced by iron homeostasis transcription factor Aft2p; multicopy suppressor of temperature sensitive hsf1 mutant; induced by treatmen…
YPL067C	488.234	0.302678	0.16581	1.82913	0.0673802	0.128279	YPL067C	Putative protein of unknown function; green fluorescent protein (GFP)-fusion protein localizes to the cytoplasm; YPL067C is not an essential gene [Source:SGD;Acc:S000005988]
YBR089W	5.74928	-0.216067	0.165762	-1.36214	0.173153	0.27752	YBR089W	Dubious open reading frame; unlikely to encode a functional protein, based on available experimental and comparative sequence data; almost completely overlaps the verified gene POL30 [Source:SGD;Acc:S000000293]
YGL156W	141.296	1.14077	0.165758	6.75594	1.41915e-11	2.26704e-10	AMS1	Vacuolar alpha mannosidase; involved in free oligosaccharide (fOS) degradation; delivered to the vacuole in a novel pathway separate from the secretory pathway [Source:SGD;Acc:S000003124]
YDR235W	637.599	0.312883	0.165752	1.86929	0.061583	0.119336	PRP42	U1 snRNP protein involved in splicing; required for U1 snRNP biogenesis; contains multiple tetriatricopeptide repeats [Source:SGD;Acc:S000002643]
YHR184W	102.337	0.0501331	0.165741	0.330707	0.740866	0.828538	SSP1	Protein involved in the control of meiotic nuclear division; involved in the coordination of meiosis with spore formation; subunit of the leading edge protein (LEP) complex (Ssp1-Ady3-Don1-Irc10) that forms a ring-like structure at the leading edge of the prospore membrane during meiosis II; required for assembly of the leading edge coat and both prospore membrane shaping and organization; transc…
YPR123C	9.77654	-0.117603	0.16571	-0.703732	0.4816	0.60775	YPR123C	Dubious open reading frame; unlikely to encode a functional protein, based on available experimental and comparative sequence data; partially/completely overlaps the verified ORF CTR [Source:SGD;Acc:S000006327]
YDR263C	117.435	-0.371593	0.165621	-2.24955	0.0244778	0.0546906	DIN7	Mitochondrial nuclease functioning in DNA repair and replication; modulates the stability of the mitochondrial genome, induced by exposure to mutagens, also induced during meiosis at a time nearly coincident with commitment to recombination; DIN7 has a paralog, EXO1, that arose from the whole genome duplication [Source:SGD;Acc:S000002671]
snR83	110.888	-0.0945297	0.165537	-0.553586	0.579862	0.695702	snR83	H/ACA box small nucleolar RNA (snoRNA); guides pseudouridylation of small subunit (SSU) rRNA at positions U1290 and U1415 [Source:SGD;Acc:S000028468]
YNL007C	2081.99	0.245777	0.165433	1.52074	0.128324	0.218408	SIS1	Type II HSP40 co-chaperone that interacts with the HSP70 protein Ssa1p; shuttles between cytosol and nucleus; mediates delivery of misfolded proteins into the nucleus for degradation; involved in proteasomal degradation of misfolded cytosolic proteins; protein abundance increases in response to DNA replication stress; polyQ aggregates sequester Sis1p and interfere with clearance of misfolded prot…
YLR318W	230.651	0.414767	0.165407	2.47422	0.0133529	0.0327653	EST2	Reverse transcriptase subunit of the telomerase holoenzyme; essential for telomerase core catalytic activity, involved in other aspects of telomerase assembly and function; mutations in human homolog are associated with aplastic anemia [Source:SGD;Acc:S000004310]
YOR277C	5.3556	-0.0331982	0.165383	-0.0922826	0.926473	0.952503	YOR277C	Dubious open reading frame; unlikely to encode a functional protein, based on available experimental and comparative sequence data; almost completely overlaps the verified gene CAF20 [Source:SGD;Acc:S000005803]
YCR024C	372.841	-0.249441	0.165381	-1.51518	0.129727	0.220259	SLM5	Mitochondrial asparaginyl-tRNA synthetase [Source:SGD;Acc:S000000618]
YML087C	116.469	-0.311214	0.165352	-1.88133	0.0599273	0.116486	AIM33	Protein of unknown function, highly conserved across species; homolog of human CYB5R4; null mutant displays reduced frequency of mitochondrial genome loss; AIM33 has a paralog, PGA3, that arose from the whole genome duplication [Source:SGD;Acc:S000004552]
YKL103C	391.284	-0.82306	0.165344	-5.07127	3.95163e-07	3.02574e-06	YKL103C	Vacuolar aminopeptidase yscI; zinc metalloproteinase that belongs to the peptidase family M18; often used as a marker protein in studies of autophagy and cytosol to vacuole targeting (CVT) pathway; protein increases in abundance and relative distribution to cytoplasmic foci increases upon DNA replication stress [Source:SGD;Acc:S000001586]
YDL094C	5.33442	0.086512	0.16526	0.509991	0.610058	0.72026	YDL094C	Dubious open reading frame; unlikely to encode a functional protein, based on available experimental and comparative sequence data; partially overlaps verfied gene PMT5/YDL093W; YDL094C is not essential [Source:SGD;Acc:S000002252]
YGR108W	881.391	-0.051775	0.165203	-0.292293	0.770063	0.849022	CLB1	B-type cyclin involved in cell cycle progression; activates Cdc28p to promote the transition from G2 to M phase; accumulates during G2 and M, then targeted via a destruction box motif for ubiquitin-mediated degradation by the proteasome; CLB1 has a paralog, CLB2, that arose from the whole genome duplication [Source:SGD;Acc:S000003340]
YOR010C	92.5533	0.658379	0.16516	3.94956	7.82943e-05	0.00036775	TIR2	Putative cell wall mannoprotein; member of the Srp1p/Tip1p family of serine-alanine-rich proteins; transcription is induced by cold shock and anaerobiosis; TIR2 has a paralog, TIR3, that arose from the whole genome duplication [Source:SGD;Acc:S000005536]
YHR177W	86.6888	-0.663077	0.165073	-4.00656	6.16102e-05	0.000297686	YHR177W	Putative transcription factor containing a WOPR domain; binds DNA in vitro; similar to C. albicans Wor1p transcription factor that regulates white-opaque switching; overexpression causes a cell cycle delay or arrest [Source:SGD;Acc:S000001220]
YAL032C	302.093	-0.224796	0.165037	-1.37408	0.169416	0.272852	PRP45	Protein required for pre-mRNA splicing; associates with the spliceosome and interacts with splicing factors Prp22p and Prp46p; orthologous to human transcriptional coactivator SKIP and can activate transcription of a reporter gene [Source:SGD;Acc:S000000030]
YPR002W	116.953	0.605774	0.16502	3.64918	0.000263082	0.00107104	PDH1	Putative 2-methylcitrate dehydratase; mitochondrial protein that participates in respiration; induced by diauxic shift; homologous to E. coli PrpD, may take part in the conversion of 2-methylcitrate to 2-methylisocitrate [Source:SGD;Acc:S000006206]
YNL334C	89.1129	0.195871	0.164924	1.18619	0.235549	0.352316	SNO2	Protein of unknown function; nearly identical to Sno3p; expression is induced before the diauxic shift and also in the absence of thiamin [Source:SGD;Acc:S000005278]
YJL127C-B	565.086	0.25587	0.164808	1.56629	0.11728	0.202847	YJL127C-B	Putative protein of unknown function; identified based on homology to the filamentous fungus, Ashbya gossypii; SWAT-GFP and seamless-GFP fusion proteins localize to the mitochondria [Source:SGD;Acc:S000028522]
YML007C-A	4.20266	-0.00778859	0.164727	-0.0398319	0.968227	0.978802	YML007C-A	Putative protein of unknown function; green fluorescent protein (GFP)-fusion protein localizes to mitochondria [Source:SGD;Acc:S000007621]
YHL035C	887.311	-0.231289	0.164727	-1.37224	0.169989	0.273565	VMR1	Vacuolar membrane protein; involved in multiple drug resistance and metal sensitivity; ATP-binding cassette (ABC) family member involved in drug transport; potential Cdc28p substrate; induced under respiratory conditions; VMR1 has a paralog, YBT1, that arose from the whole genome duplication [Source:SGD;Acc:S000001027]
YLR099W-A	175.461	0.541894	0.164698	3.30576	0.00094718	0.0033473	MIM2	Mitochondrial protein required for outer membrane protein import; involved in import of the subset of proteins with multiple alpha-helical transmembrane segments, including Ugo1p, Tom20p, and Fzo1p; component of a large protein complex in the outer membrane that includes Mim1p; not essential in W303 strain background [Source:SGD;Acc:S000007618]
YKL106C-A	5.14187	0.237413	0.164675	1.12465	0.260736	0.381378	YKL106C-A	Putative protein of unknown function; identified by homology to uncharacterized proteins in other fungi [Source:SGD;Acc:S000007616]
YOR097C	153.064	0.139599	0.164658	0.852106	0.394155	0.524381	YOR097C	Putative protein of unknown function; identified as interacting with Hsp82p in a high-throughput two-hybrid screen; YOR097C is not an essential gene [Source:SGD;Acc:S000005623]
YIL160C	4.98585	0.360886	0.164652	1.98233	0.0474422	0.096044	POT1	3-ketoacyl-CoA thiolase with broad chain length specificity; cleaves 3-ketoacyl-CoA into acyl-CoA and acetyl-CoA during beta-oxidation of fatty acids [Source:SGD;Acc:S000001422]
YHR136C	5.96717	-0.179841	0.164651	-0.729971	0.465408	0.593304	SPL2	Protein with similarity to cyclin-dependent kinase inhibitors; downregulates low-affinity phosphate transport during phosphate limitation by targeting Pho87p to the vacuole; upstream region harbors putative hypoxia response element (HRE) cluster; overproduction suppresses a plc1 null mutation; promoter shows an increase in Snf2p occupancy after heat shock; GFP-fusion protein localizes to the cyto…
YLR338W	7.18673	-0.0572336	0.164647	-0.340575	0.733423	0.822553	OPI9	Dubious open reading frame; unlikely to encode a functional protein, based on available experimental and comparative sequence data; partially overlaps the verified ORF VRP1/YLR337C [Source:SGD;Acc:S000004330]
YLR178C	228.3	0.384841	0.164631	2.24504	0.0247654	0.0552351	TFS1	Inhibitor of carboxypeptidase Y (Prc1p), and Ras GAP (Ira2p); phosphatidylethanolamine-binding protein (PEBP) family member and ortholog of hPEBP1/RKIP, a natural metastasis suppressor; targets to vacuolar membranes during stationary phase; acetylated by NatB N-terminal acetyltransferase; protein abundance increases in response to DNA replication stress [Source:SGD;Acc:S000004168]
YMR077C	284.613	0.951599	0.164582	5.6788	1.35641e-08	1.3114e-07	VPS20	Myristoylated subunit of the ESCRT-III complex; the endosomal sorting complex required for transport of transmembrane proteins into the multivesicular body pathway to the lysosomal/vacuolar lumen; cytoplasmic protein recruited to endosomal membranes [Source:SGD;Acc:S000004682]
YIR005W	128.55	0.787557	0.16452	4.7147	2.42073e-06	1.61913e-05	IST3	Component of the U2 snRNP; required for the first catalytic step of splicing and for spliceosomal assembly; interacts with Rds3p and is required for Mer1p-activated splicing; diploid mutants have a specific defect in MATa1 pre-mRNA splicing which leads to haploid gene expression in diploids [Source:SGD;Acc:S000001444]
YDR241W	120.859	0.831384	0.164387	4.99759	5.80524e-07	4.3343e-06	BUD26	Dubious open reading frame; unlikely to encode a functional protein, based on available experimental and comparative sequence data; not conserved in closely related Saccharomyces species; 1% of ORF overlaps the verified gene SNU56; diploid mutant displays a weak budding pattern phenotype in a systematic assay [Source:SGD;Acc:S000002649]
YKL217W	134.902	0.892262	0.164385	5.26062	1.43569e-07	1.19527e-06	JEN1	Monocarboxylate/proton symporter of the plasma membrane; transport activity is dependent on the pH gradient across the membrane; mediates high-affinity uptake of carbon sources lactate, pyuvate, and acetate, and also of the micronutrient selenite, whose structure mimics that of monocarboxylates; expression and localization are tightly regulated, with transcription repression, mRNA degradation, an…
tP(UGG)M	6.87651	0.592034	0.164325	2.61484	0.00892694	0.0232569	SUF7	Proline tRNA (tRNA-Pro), predicted by tRNAscan-SE analysis; target of K. lactis zymocin; can mutate to suppress +1 frameshift mutations in proline codons [Source:SGD;Acc:S000006684]
YKL133C	101.266	0.506731	0.164279	3.09044	0.00199858	0.00645079	YKL133C	Putative protein of unknown function; not required for growth of cells lacking the mitochondrial genome; SWAT-GFP and mCherry fusion proteins localize to the mitochondria; YKL133C has a paralog, MGR3, that arose from the whole genome duplication [Source:SGD;Acc:S000001616]
YGL015C	4.40623	0.0896658	0.1642	0.521663	0.601905	0.713848	YGL015C	Putative protein of unknown function; null mutants accumulate cargo in the Golgi [Source:SGD;Acc:S000002983]
YMR105C	340.173	-0.188626	0.16418	-1.19708	0.231275	0.34716	PGM2	Phosphoglucomutase; catalyzes the conversion from glucose-1-phosphate to glucose-6-phosphate, which is a key step in hexose metabolism; functions as the acceptor for a Glc-phosphotransferase; protein abundance increases in response to DNA replication stress; PGM2 has a paralog, PGM1, that arose from the whole genome duplication [Source:SGD;Acc:S000004711]
YBR066C	219.149	-0.769442	0.164001	-4.72491	2.30212e-06	1.54473e-05	NRG2	Transcriptional repressor; mediates glucose repression and negatively regulates filamentous growth; activated in stochastic pulses of nuclear localization in response to low glucose [Source:SGD;Acc:S000000270]
YJL091C	739.036	-0.198086	0.163973	-1.2012	0.229675	0.345501	GWT1	Protein involved in the inositol acylation of GlcN-PI; the inositol acylation of glucosaminyl phosphatidylinositol (GlcN-PI) forms glucosaminyl(acyl)phosphatidylinositol (GlcN(acyl)PI), an intermediate in the biosynthesis of glycosylphosphatidylinositol (GPI) anchors [Source:SGD;Acc:S000003627]
YOR249C	291.01	0.149745	0.163912	0.911779	0.361885	0.491968	APC5	Subunit of the Anaphase-Promoting Complex/Cyclosome (APC/C); APC/C is a ubiquitin-protein ligase required for degradation of anaphase inhibitors, including mitotic cyclins, during the metaphase/anaphase transition; component of the platform domain of the APC/C, based on structural analysis; relative distribution to nuclear foci decreases upon DNA replication stress [Source:SGD;Acc:S000005775]
YJL077W-A	80.1276	0.595131	0.163901	3.60505	0.000312092	0.00124876	YJL077W-A	Protein of unknown function; mRNA identified as translated by ribosome profiling data; completely overlaps the verified gene YJL077C/ICS3 [Source:SGD;Acc:S000028661]
YCL064C	173.231	1.6447	0.163844	9.79331	1.20295e-22	6.94623e-21	CHA1	Catabolic L-serine (L-threonine) deaminase; catalyzes the degradation of both L-serine and L-threonine; required to use serine or threonine as the sole nitrogen source, transcriptionally induced by serine and threonine [Source:SGD;Acc:S000000569]
YNL024C	231.142	0.729407	0.163588	4.36942	1.24576e-05	7.10221e-05	EFM6	Putative S-adenosylmethionine-dependent lysine methyltransferase; responsible for modifying Lys-390 in translational elongation factor EF-1 alpha (eEF1A); has seven beta-strand methyltransferase motif; green fluorescent protein (GFP)-fusion protein localizes to the cytoplasm [Source:SGD;Acc:S000004969]
snR19	75.26	-0.13014	0.163548	-0.791547	0.428625	0.557596	snR19	U1 spliceosomal RNA (U1 snRNA); snRNA U1 homolog [Source:SGD;Acc:S000007295]
YJR041C	1946.84	-0.0691096	0.163527	-0.4152	0.677995	0.778989	URB2	Protein required for normal metabolism of the rRNA primary transcript; nucleolar protein; proposed to be involved in ribosome biogenesis [Source:SGD;Acc:S000003802]
YLR211C	120.847	0.415619	0.163502	2.50156	0.0123649	0.0306759	ATG38	Homodimeric subunit of autophagy-specific PtdIns-3-kinase complex I; required for the integrity of the active PtdIns-3-kinase complex I by maintaining an association between Vps15p-Vps34p and Atg14p-Vps30p subcomplexes; localizes to the pre-autophagosomal structure (PAS) in an Atg14p-dependent manner; ATG38 is non-essential but is required for macroautophagy [Source:SGD;Acc:S000004201]
YPR197C	4.14888	-0.262232	0.163456	-1.75803	0.0787426	0.145724	YPR197C	Dubious open reading frame; unlikely to encode a functional protein, based on available experimental and comparative sequence data; overlaps ORF SGE1/YPR198W [Source:SGD;Acc:S000006401]
YIL119C	145.61	-0.589211	0.163433	-3.58557	0.000336345	0.00133225	RPI1	Transcription factor, allelic differences between S288C and Sigma1278b; mediates fermentation stress tolerance by modulating cell wall integrity; overexpression suppresses heat shock sensitivity of wild-type RAS2 overexpression and also suppresses cell lysis defect of mpk1 mutation; allele from S288c can confer fMAPK pathway independent transcription of FLO11; S288C and Sigma1278b alleles differ …
YMR040W	83.5348	-0.057572	0.163413	-0.360673	0.718344	0.811424	YET2	Protein of unknown function that may interact with ribosomes; based on co-purification experiments; homolog of human BAP31 protein; YET2 has a paralog, YET1, that arose from the whole genome duplication [Source:SGD;Acc:S000004643]
YLR128W	125.571	0.329757	0.1634	2.01275	0.044141	0.0900052	DCN1	Scaffold-type E3 ligase; required for cullin neddylation and ubiquitin ligase activation; contains a ubiquitin-binding domain (UBA) for ubiquitin and Nedd8 (Rub1p) interaction and a PONY domain involved in cullin binding and neddylation [Source:SGD;Acc:S000004118]
YPR194C	688.882	-0.747139	0.163301	-4.6134	3.96132e-06	2.52609e-05	OPT2	Oligopeptide transporter; localized to peroxisomes and affects glutathione redox homeostasis; also localizes to the plasma membrane (PM) and to the late Golgi, and has a role in maintenance of lipid asymmetry between the inner and outer leaflets of the PM; member of the OPT family, with potential orthologs in S. pombe and C. albicans; also plays a role in formation of mature vacuoles and in polar…
YOR258W	112.622	0.268526	0.163262	1.61476	0.106364	0.186685	HNT3	DNA 5' AMP hydrolase involved in DNA repair; member of the histidine triad (HIT) superfamily of nucleotide-binding proteins; homolog of Aprataxin, a Hint related protein that is mutated in individuals with ataxia with oculomotor apraxia; relative distribution to nuclear foci decreases upon DNA replication stress [Source:SGD;Acc:S000005784]
YLR402W	244.516	0.0441626	0.163163	0.26968	0.787406	0.859958	YLR402W	Dubious open reading frame; unlikely to encode a functional protein, based on available experimental and comparative sequence data [Source:SGD;Acc:S000004394]
YPR157W	810.021	1.64984	0.163125	9.91624	3.53845e-23	2.14144e-21	TDA6	Putative protein of unknown function; induced by treatment with 8-methoxypsoralen and UVA irradiation; null mutant is sensitive to expression of the top1-T722A allele; SWAT-GFP and mCherry fusion proteins localize to the cell periphery and vacuole; TDA6 has a paralog, VPS62, that arose from the whole genome duplication [Source:SGD;Acc:S000006361]
YEL048C	547.056	0.408309	0.163102	2.48976	0.0127831	0.0315888	TCA17	Component of transport protein particle (TRAPP) complex II; TRAPPII is a multimeric guanine nucleotide-exchange factor for the GTPase Ypt1p, regulating intra-Golgi and endosome-Golgi traffic; promotes association of TRAPPII-specific subunits with the TRAPP core complex; sedlin related; human Sedlin mutations cause SEDT, a skeletal disorder [Source:SGD;Acc:S000000774]
YMR206W	5.07173	-0.148683	0.163095	-0.93542	0.349572	0.479035	YMR206W	Putative protein of unknown function; not an essential gene; YMR206W has a paralog, YNR014W, that arose from the whole genome duplication [Source:SGD;Acc:S000004819]
YJL131C	192.56	-0.168351	0.163093	-0.985732	0.324265	0.453035	AIM23	Mitochondrial translation initiation factor 3 (IF3, mIF3); evolutionarily conserved; binds to E. coli ribosomes in vitro; null mutant displays severe respiratory growth defect and elevated frequency of mitochondrial genome loss [Source:SGD;Acc:S000003667]
YML108W	774.737	0.253297	0.16306	1.53073	0.125837	0.215105	YML108W	Protein of unknown function; structure defines a new subfamily of the split beta-alpha-beta sandwiches; green fluorescent protein (GFP)-fusion protein localizes to the cytoplasm and nucleus; YML108W is not an essential gene; relative distribution to the nucleus increases upon DNA replication stress [Source:SGD;Acc:S000004576]
YLR136C	230.397	-0.866411	0.163037	-5.46234	4.69907e-08	4.1833e-07	TIS11	mRNA-binding protein expressed during iron starvation; binds to a sequence element in the 3'-untranslated regions of specific mRNAs to mediate their degradation; involved in iron homeostasis; protein increases in abundance and relative distribution to the nucleus increases upon DNA replication stress; TIS11 has a paralog, CTH1, that arose from the whole genome duplication [Source:SGD;Acc:S0000041…
YCR063W	136.973	-0.23237	0.163011	-1.4183	0.156104	0.256265	BUD31	Component of the SF3b subcomplex of the U2 snRNP; increases efficiency of first and second step pre-mRNA splicing; diploid mutants display a random budding pattern instead of the wild-type bipolar pattern; facilitates passage through G1/S Start, but is not required for G2/M transition or exit from mitosis [Source:SGD;Acc:S000000659]
YGL005C	441.647	0.198304	0.163006	1.2032	0.228901	0.344822	COG7	Component of the conserved oligomeric Golgi complex; a cytosolic tethering complex (Cog1p through Cog8p) that functions in protein trafficking to mediate fusion of transport vesicles to Golgi compartments [Source:SGD;Acc:S000002973]
YGL204C	221.407	0.0922986	0.162951	0.546945	0.584416	0.698768	YGL204C	Protein of unknown function; mRNA identified as translated by ribosome profiling data; SWAT-GFP and mCherry fusion proteins localize to the endoplasmic reticulum [Source:SGD;Acc:S000003172]
YDL042C	566.268	-0.84473	0.162945	-5.25858	1.45171e-07	1.20701e-06	SIR2	Conserved NAD+ dependent histone deacetylase of the Sirtuin family; deacetylation targets are primarily nuclear proteins; required for telomere hypercluster formation in quiescent yeast cells; involved in regulation of lifespan; plays roles in silencing at HML, HMR, telomeres, and rDNA; negatively regulates initiation of DNA replication; functions as regulator of autophagy like mammalian homolog …
YLR262C	256.612	0.0279713	0.162943	0.174325	0.86161	0.911424	YPT6	Rab family GTPase; required for endosome-to-Golgii, intra-Golgi retrograde, and retrograde Golgi-to-ER transport; temporarily at the Golgi, dissociating into the cytosol on arrival of the late Golgi GTPase Ypt32p; Golgi-localized form is GTP bound, while cytosolic form is GDP-bound; required for delivery of Atg9p to the phagophore assembly site during autophagy under heat stress, with Ypt6p for s…
YCL021W-A	96.4401	0.0774519	0.162919	0.465495	0.641577	0.747102	YCL021W-A	Putative protein of unknown function; SWAT-GFP and mCherry fusion proteins localize to the vacuole [Source:SGD;Acc:S000007549]
ICR1	183.274	-0.532415	0.162915	-3.26998	0.00107557	0.00374841	ICR1	Long intergenic regulatory ncRNA; has a key role in regulating transcription of the nearby protein-coding ORF FLO11; initiated far upstream from FLO11 and transcribed across much of the large promoter of FLO11, repressing FLO11 transcription in cis [Source:SGD;Acc:S000132612]
YOL118C	4.16422	-0.345484	0.162818	-2.2981	0.0215559	0.0488911	YOL118C	Putative protein of unknown function; conserved across S. cerevisiae strains [Source:SGD;Acc:S000005478]
YLL004W	348.144	0.332107	0.162818	2.02169	0.0432086	0.0884119	ORC3	Subunit of the origin recognition complex (ORC); ORC directs DNA replication by binding to replication origins and is also involved in transcriptional silencing [Source:SGD;Acc:S000003927]
YLL032C	390.642	-0.0839346	0.162803	-0.51502	0.606539	0.717182	YLL032C	Protein of unknown function; may interact with ribosomes, based on co-purification experiments; green fluorescent protein (GFP)-fusion protein localizes to the cytoplasm; YLL032C is not an essential gene [Source:SGD;Acc:S000003955]
YMR204C	104.549	-0.311693	0.162751	-1.93947	0.0524438	0.104423	INP1	Peripheral membrane protein of peroxisomes; involved in peroxisomal inheritance; recruitment to peroxisomes is mediated by interaction with Pex3p at the peroxisomal membrane [Source:SGD;Acc:S000004817]
YFL054C	189.988	-0.185203	0.162703	-1.16106	0.245617	0.36383	AQY3	Putative channel-like protein; similar to Fps1p; mediates passive diffusion of glycerol in the presence of ethanol [Source:SGD;Acc:S000001840]
YIR009W	242.507	0.548031	0.162694	3.34896	0.000811157	0.00290907	MSL1	U2B component of U2 snRNP; involved in splicing, binds the U2 snRNA stem-loop IV in vitro but requires association of Lea1p for in vivo binding; does not contain the conserved C-terminal RNA binding domain found in other family members [Source:SGD;Acc:S000001448]
YMR025W	78.9298	0.653197	0.162541	3.92269	8.75647e-05	0.000405841	CSI1	Subunit of the Cop9 signalosome; which is required for deneddylation, or removal of the ubiquitin-like protein Rub1p from Cdc53p (cullin); involved in adaptation to pheromone signaling; functional equivalent of canonical Csn6 subunit of the COP9 signalosome [Source:SGD;Acc:S000004627]
YKL018C-A	227.635	0.377879	0.162519	2.33467	0.0195609	0.0452301	YKL018C-A	Putative protein of unknown function; identified by homology; green fluorescent protein (GFP)-fusion protein localizes to the cytoplasm [Source:SGD;Acc:S000007615]
YDR357C	233.785	0.312869	0.162502	1.89624	0.0579287	0.113261	CNL1	Subunit of the BLOC-1 complex involved in endosomal maturation; interacts with Msb3p; null mutant is sensitive to drug inducing secretion of vacuolar cargo; green fluorescent protein (GFP)-fusion protein localizes to the cytoplasm [Source:SGD;Acc:S000002765]
YEL004W	280.934	0.159293	0.162433	0.971782	0.331159	0.460012	YEA4	Uridine diphosphate-N-acetylglucosamine (UDP-GlcNAc) transporter; required for cell wall chitin synthesis; localized to the ER [Source:SGD;Acc:S000000730]
YDR100W	561.122	0.482947	0.162386	2.95916	0.00308477	0.00929419	TVP15	Integral membrane protein; localized to late Golgi vesicles along with the v-SNARE Tlg2p [Source:SGD;Acc:S000002507]
tH(GUG)M	6.81106	0.551178	0.162384	2.35622	0.0184618	0.0431644	tH(GUG)M	Histidine tRNA (tRNA-His), predicted by tRNAscan-SE analysis [Source:SGD;Acc:S000006599]
snR87	175.84	-0.198035	0.162382	-1.22081	0.222159	0.3372	snR87	C/D box small nucleolar RNA (snoRNA); guides 2'-O-methylation of small subunit (SSU) rRNA at position A436 [Source:SGD;Acc:S000114301]
YJL195C	5.0101	0.091648	0.16234	0.548681	0.583224	0.697977	YJL195C	Dubious open reading frame; unlikely to encode a functional protein, based on available experimental and comparative sequence data; partially overlaps the verified gene YJL194W/CDC6 [Source:SGD;Acc:S000003731]
YHR171W	131.747	-0.287753	0.162253	-1.76238	0.0780057	0.144828	ATG7	Autophagy-related protein and dual specificity member of the E1 family; mediates the attachment of Atg12p to Atg5p and Atg8p to phosphatidylethanolamine which are required steps in autophagosome formation; E1 enzymes are also known as ubiquitin-activating enzymes; involved in methionine restriction extension of chronological lifespan in an autophagy-dependent manner [Source:SGD;Acc:S000001214]
RUF23	5.07605	0.0239749	0.162244	0.0824884	0.934258	0.95894	RUF23	RNA of Unknown Function; precise location of 3' end uncertain; RUF23 may be longer than currently annotated [Source:SGD;Acc:S000130133]
YOR378W	95.2052	-0.904103	0.162161	-5.68152	1.33501e-08	1.2987e-07	AMF1	Low affinity NH4+ transporter; member of the DHA2 family of drug:H+ anti porters; putative paralog of ATR1; but not required for boron tolerance; non-essential gene [Source:SGD;Acc:S000005905]
YLR446W	77.6253	-0.0753022	0.162142	-0.458866	0.64633	0.751557	YLR446W	Putative hexokinase; transcript is upregulated during sporulation and the unfolded protein response; YLR446W is not an essential gene [Source:SGD;Acc:S000004438]
YER124C	3242.01	0.606144	0.162054	3.71897	0.000200036	0.000838235	DSE1	Daughter cell-specific protein; may regulate cross-talk between the mating and filamentation pathways; deletion affects cell separation after division and sensitivity to alpha-factor and drugs affecting the cell wall; relocalizes from bud neck to cytoplasm upon DNA replication stress [Source:SGD;Acc:S000000926]
YNR044W	1152.46	-1.03714	0.161984	-6.57767	4.77873e-11	7.09371e-10	AGA1	Anchorage subunit of a-agglutinin of a-cells; highly O-glycosylated protein with N-terminal secretion signal and C-terminal signal for addition of GPI anchor to cell wall, linked to adhesion subunit Aga2p via two disulfide bonds; AGA1 has a paralog, FIG2, that arose from the whole genome duplication [Source:SGD;Acc:S000005327]
YDR171W	837.47	-0.334138	0.161978	-2.09974	0.0357517	0.0754598	HSP42	Small heat shock protein (sHSP) with chaperone activity; forms barrel-shaped oligomers that suppress unfolded protein aggregation; involved in cytoskeleton reorganization after heat shock; protein abundance increases and forms cytoplasmic foci in response to DNA replication stress [Source:SGD;Acc:S000002578]
YOR186C-A	4.30277	-0.0731803	0.161966	-0.292232	0.770109	0.849022	YOR186C-A	Protein of unknown function; identified by gene-trapping, microarray-based expression analysis, and genome-wide homology searching [Source:SGD;Acc:S000028715]
YGR052W	248.061	0.408598	0.161955	2.44116	0.0146402	0.0354678	FMP48	Putative protein of unknown function; the authentic, non-tagged protein is detected in highly purified mitochondria in high-throughput studies; induced by treatment with 8-methoxypsoralen and UVA irradiation [Source:SGD;Acc:S000003284]
YOL077W-A	486.482	0.135573	0.161901	0.831773	0.405537	0.534321	ATP19	Subunit k of the mitochondrial F1F0 ATP synthase; F1F0 ATP synthase is a large, evolutionarily conserved enzyme complex required for ATP synthesis; associated only with the dimeric form of ATP synthase [Source:SGD;Acc:S000007339]
YFR036W	130.718	-0.121473	0.16189	-0.736742	0.461279	0.589501	CDC26	Subunit of the Anaphase-Promoting Complex/Cyclosome (APC/C); which is a ubiquitin-protein ligase required for degradation of anaphase inhibitors, including mitotic cyclins, during the metaphase/anaphase transition; relocalizes to the cytosol in response to hypoxia [Source:SGD;Acc:S000001932]
YDL199C	109.567	0.129672	0.161873	0.77173	0.440274	0.568751	YDL199C	Putative transporter; member of the sugar porter family [Source:SGD;Acc:S000002358]
YDR484W	338.637	0.334958	0.161801	2.0551	0.0398695	0.0828454	VPS52	Component of the GARP (Golgi-associated retrograde protein) complex; GARP is required for the recycling of proteins from endosomes to the late Golgi, and for mitosis after DNA damage induced checkpoint arrest; involved in localization of actin and chitin; members of the GARP complex are Vps51p-Vps52p-Vps53p-Vps54p [Source:SGD;Acc:S000002892]
YBL074C	138.942	-0.426339	0.161772	-2.65887	0.00784035	0.0207777	AAR2	Component of the U5 snRNP complex; required for splicing of U3 precursors; originally described as a splicing factor specifically required for splicing pre-mRNA of the MATa1 cistron [Source:SGD;Acc:S000000170]
YDR183W	230.288	0.447603	0.16176	2.74237	0.00609967	0.0166915	PLP1	Protein that interacts with CCT (chaperonin containing TCP-1) complex; has a role in actin and tubulin folding; has weak similarity to phosducins, which are G-protein regulators [Source:SGD;Acc:S000002591]
YFL012W	6.21005	-0.224636	0.161753	-1.60529	0.10843	0.189836	YFL012W	Putative protein of unknown function; transcribed during sporulation; null mutant exhibits increased resistance to rapamycin [Source:SGD;Acc:S000001882]
YLR411W	89.8769	-0.245933	0.161692	-1.53676	0.124351	0.213021	CTR3	High-affinity copper transporter of the plasma membrane; acts as a trimer; gene is disrupted by a Ty2 transposon insertion in many laboratory strains of S. cerevisiae [Source:SGD;Acc:S000004403]
YNR037C	277.9	-0.341789	0.161679	-2.13681	0.032613	0.0698661	RSM19	Mitochondrial ribosomal protein of the small subunit; has similarity to E. coli S19 ribosomal protein [Source:SGD;Acc:S000005320]
YBL097W	179.188	-0.351964	0.161666	-2.19838	0.0279223	0.0612692	BRN1	Subunit of the condensin complex; required for chromosome condensation and for clustering of tRNA genes at the nucleolus; may influence multiple aspects of chromosome transmission [Source:SGD;Acc:S000000193]
YPL222C-A	4.43082	-0.0468583	0.161478	-0.231727	0.81675	0.882813	YPL222C-A	Protein of unknown function; identified by gene-trapping, microarray-based expression analysis, and genome-wide homology searching [Source:SGD;Acc:S000028722]
YML037C	142.94	-0.481096	0.161366	-3.01156	0.00259913	0.00801123	YML037C	Putative protein of unknown function; has some characteristics of a transcriptional activator; may be a target of Dbf2p-Mob1p kinase; GFP-fusion protein co-localizes with clathrin-coated vesicles; YML037C is not an essential gene [Source:SGD;Acc:S000004501]
YMR003W	148.211	0.324893	0.161296	1.99946	0.0455586	0.0925585	AIM34	Protein of unknown function; GFP-fusion protein localizes to the mitochondria; null mutant is viable and displays reduced frequency of mitochondrial genome loss [Source:SGD;Acc:S000004605]
YLR428C	3.6698	0.0876142	0.161288	0.413353	0.679348	0.780259	YLR428C	Dubious open reading frame; unlikely to encode a functional protein, based on available experimental and comparative sequence data; partially overlaps the verified ORF CRN1 [Source:SGD;Acc:S000004420]
YFL057C	116.323	0.245002	0.161273	1.55283	0.120463	0.207497	NA	NA
YPR094W	177.78	0.493214	0.161197	3.04464	0.00232958	0.00734221	RDS3	Component of the SF3b subcomplex of the U2 snRNP; zinc cluster protein involved in pre-mRNA splicing and cycloheximide resistance [Source:SGD;Acc:S000006298]
YHL036W	154.161	-0.136221	0.161151	-0.843311	0.399054	0.528879	MUP3	Low affinity methionine permease; similar to Mup1p [Source:SGD;Acc:S000001028]
YHL050C	552.636	-0.651372	0.161092	-4.10633	4.01989e-05	0.000202734	YHL050C	Putative protein of unknown function; potential Cdc28p substrate [Source:SGD;Acc:S000001042]
YER150W	846.696	1.08838	0.161026	6.63267	3.29675e-11	5.06091e-10	SPI1	GPI-anchored cell wall protein involved in weak acid resistance; basal expression requires Msn2p/Msn4p; expression is induced under conditions of stress and during the diauxic shift; SPI1 has a paralog, SED1, that arose from the whole genome duplication [Source:SGD;Acc:S000000952]
YKR091W	423.285	1.10981	0.161025	6.83387	8.26516e-12	1.3618e-10	SRL3	GTB motif (G1/S transcription factor binding) containing protein; binds SBF-regulated promoters in hydroxyurea-treated cells; when overexpressed, suppresses the lethality of a rad53 null mutation; potential Cdc28p substrate; SRL3 has a paralog, WHI5, that arose from the whole genome duplication [Source:SGD;Acc:S000001799]
YOL164W-A	4.67689	-0.1567	0.16102	-1.34086	0.179967	0.285398	YOL164W-A	Putative protein of unknown function; identified by fungal homology and RT-PCR [Source:SGD;Acc:S000028580]
YDL154W	231.628	-0.370875	0.160967	-2.30403	0.0212211	0.0483057	MSH5	Protein of the MutS family; forms a dimer with Msh4p that facilitates crossovers between homologs during meiosis; msh5-Y823H mutation confers tolerance to DNA alkylating agents; homologs present in C. elegans and humans [Source:SGD;Acc:S000002313]
YIL170W	4.91783	0.024868	0.160945	0.169078	0.865735	0.914098	HXT12	Possible pseudogene in strain S288C; YIL170W/HXT12 and the adjacent ORF, YIL171W, together encode a non-functional member of the hexose transporter family [Source:SGD;Acc:S000001432]
YER153C	131.297	-0.726405	0.160927	-4.59776	4.27057e-06	2.69869e-05	PET122	Mitochondrial translational activator specific for the COX3 mRNA; acts together with Pet54p and Pet494p; located in the mitochondrial inner membrane [Source:SGD;Acc:S000000955]
YCR099C	90.9964	0.369479	0.160917	2.27298	0.0230275	0.0517994	YCR099C	Putative protein of unknown function [Source:SGD;Acc:S000000696]
YHR176W	112.707	0.123155	0.160796	0.748467	0.454178	0.58273	FMO1	Flavin-containing monooxygenase; localized to the cytoplasmic face of the ER membrane; catalyzes oxidation of biological thiols to maintain the ER redox buffer ratio for correct folding of disulfide-bonded proteins [Source:SGD;Acc:S000001219]
snR40	5.52115	0.00688816	0.160759	0.0809211	0.935505	0.95942	snR40	C/D box small nucleolar RNA (snoRNA); guides 2'-O-methylation of large subunit (LSU) rRNA at position U898 and small subunit (SSU) rRNA at position G1271 [Source:SGD;Acc:S000007304]
YIL166C	84.6223	0.285575	0.160674	1.76463	0.0776256	0.144336	YIL166C	Putative protein with similarity to allantoate permease; similar to the allantoate permease (Dal5p) subfamily of the major facilitator superfamily; mRNA expression is elevated by sulfur limitation; YIL166C is a non-essential gene [Source:SGD;Acc:S000001428]
YDR118W	257.056	0.00939823	0.160638	0.0588937	0.953037	0.970222	APC4	Subunit of the Anaphase-Promoting Complex/Cyclosome (APC/C); APC/C is a ubiquitin-protein ligase required for degradation of anaphase inhibitors, including mitotic cyclins, during the metaphase/anaphase transition; component of the platform domain of the APC/C, based on structural analysis; relative distribution to the nucleus increases upon DNA replication stress [Source:SGD;Acc:S000002525]
YBL043W	169.046	1.4715	0.160615	8.96842	3.00789e-19	1.21357e-17	ECM13	Non-essential protein of unknown function; induced by treatment with 8-methoxypsoralen and UVA irradiation; ECM13 has a paralog, YJR115W, that arose from the whole genome duplication [Source:SGD;Acc:S000000139]
YEL019C	106.049	-0.117233	0.160598	-0.731066	0.464739	0.592719	MMS21	Highly conserved SUMO E3 ligase subunit of SMC5-SMC6 complex; required for anchoring dsDNA breaks to the nuclear periphery; SMC5-SMC6 plays a key role in removal of X-shaped DNA structures that arise between sister chromatids during DNA replication and repair; required for efficient sister chromatid cohesion; mutants are sensitive to MMS, show increased spontaneous mutation and mitotic recombinat…
YPL123C	163.098	0.00266541	0.160596	-0.0110204	0.991207	0.99405	RNY1	Vacuolar RNase of the T(2) family; relocalizes to the cytosol where it cleaves tRNAs upon oxidative or stationary phase stress; required for tRNA-specific translational pausing suring oxidative stress; promotes apoptosis under stress conditions and this function is independent of Rny1p catalytic activity [Source:SGD;Acc:S000006044]
YBL018C	265.641	0.046184	0.1605	0.286235	0.774698	0.851248	POP8	Subunit of both RNase MRP and nuclear RNase P; RNase MRP cleaves pre-rRNA, while nuclear RNase P cleaves tRNA precursors to generate mature 5' ends and facilitates turnover of nuclear RNAs; relocalizes to the cytosol in response to hypoxia [Source:SGD;Acc:S000000114]
YLR234W	155.938	-0.663316	0.160446	-4.20467	2.61467e-05	0.000138758	TOP3	DNA Topoisomerase III; conserved protein that functions in a complex with Sgs1p and Rmi1p to relax single-stranded negatively-supercoiled DNA preferentially; DNA catenation/decatenation activity is stimulated by RPA and Sgs1p-Top3p-Rmi1p; involved in telomere stability and regulation of mitotic recombination [Source:SGD;Acc:S000004224]
YPL191C	180.45	0.125451	0.160444	0.777607	0.436801	0.565684	YPL191C	Protein of unknown function; diploid deletion strain exhibits high budding index; green fluorescent protein (GFP)-fusion protein localizes to the cytoplasm; YPL191C has a paralog, YGL082W, that arose from the whole genome duplication [Source:SGD;Acc:S000006112]
YGR036C	489.299	-0.0239629	0.160366	-0.143349	0.886015	0.926188	CAX4	Dolichyl pyrophosphate (Dol-P-P) phosphatase; has a luminally oriented active site in the ER; cleaves the anhydride linkage in Dol-P-P; required for Dol-P-P-linked oligosaccharide intermediate synthesis and protein N-glycosylation [Source:SGD;Acc:S000003268]
YNR004W	162.516	0.293441	0.16036	1.80872	0.0704951	0.133402	SWM2	Protein with a role in snRNA and snoRNA cap trimethylation; interacts with Tgs1p and shows similar phenotypes; required for trimethylation of the caps of spliceosomal snRNAs and the U3 snoRNA, and for efficient 3' end processing of U3 snoRNA; may act as a specificity factor for Tgs1p [Source:SGD;Acc:S000005287]
YBR258C	129.46	0.501378	0.160345	3.09101	0.00199477	0.00644181	SHG1	Subunit of the COMPASS (Set1C) complex; COMPASS methylates histone H3 on lysine 4 and is required in transcriptional silencing near telomeres [Source:SGD;Acc:S000000462]
YDR079W	289.949	0.494738	0.160287	3.06274	0.00219319	0.00698935	PET100	Chaperone that facilitates the assembly of cytochrome c oxidase; integral to the mitochondrial inner membrane; interacts with a subcomplex of subunits VII, VIIa, and VIII (Cox7p, Cox9p, and Cox8p) but not with the holoenzyme [Source:SGD;Acc:S000002486]
tS(UGA)E	4.08268	0.298345	0.160285	1.37564	0.168932	0.272421	SUP19	Serine tRNA (tRNA-Ser), predicted by tRNAscan-SE analysis; can mutate to suppress ochre nonsense mutations [Source:SGD;Acc:S000006734]
YOR348C	264.689	1.55676	0.160274	9.4841	2.44473e-21	1.2409e-19	PUT4	Proline permease; required for high-affinity transport of proline; also transports the toxic proline analog azetidine-2-carboxylate (AzC); PUT4 transcription is repressed in ammonia-grown cells [Source:SGD;Acc:S000005875]
YGR024C	728.82	0.441965	0.160243	2.72563	0.0064178	0.0174186	THG1	tRNAHis guanylyltransferase; adds a guanosine residue to the 5' end of tRNAH is after transcription and RNase P cleavage; can also catalyze reverse (3'-5') polymerization with certain substrates in a template-dependent reaction; couples nuclear division and migration to cell budding and cytokinesis; essential enzyme conserved among eukaryotes [Source:SGD;Acc:S000003256]
YHR175W-A	4.13514	0.284715	0.160232	1.64198	0.100594	0.178248	YHR175W-A	Putative protein of unknown function; identified by fungal homology and RT-PCR [Source:SGD;Acc:S000028553]
YBR120C	272.657	-0.0616984	0.160224	-0.385118	0.70015	0.797456	CBP6	Mitochondrial protein required for translation of the COB mRNA; forms a complex with Cbp3p that binds to mt ribosomes near the polypeptide tunnel exit and promotes efficient translation of the COB mRNA; Cbp3p-Cbp6p complex also interacts with newly synthesized cytochrome b (Cobp) and Cbp4p to promote assembly of Cobp into the cytochrome bc1 complex; Cbp3p-Cbp6p complex is sequestered if assembly …
YER076W-A	7.1041	0.117746	0.160153	0.659068	0.509852	0.634693	YER076W-A	Dubious open reading frame; unlikely to encode a functional protein, based on available experimental and comparative sequence data; partially overlaps the uncharacterized ORF YER076C [Source:SGD;Acc:S000028750]
YMR034C	232.663	-0.563909	0.160115	-3.53246	0.000411712	0.00159368	RCH1	Putative transporter; localizes to the plasma membrane in response to high levels of extracellular calcium; member of the SLC10 carrier family; identified in a transposon mutagenesis screen as a gene involved in azole resistance; YMR034C is not an essential gene [Source:SGD;Acc:S000004637]
YDL243C	159.625	0.0063336	0.160048	0.0463181	0.963057	0.975688	AAD4	Putative aryl-alcohol dehydrogenase; involved in oxidative stress response; similar to P. chrysosporium aryl-alcohol dehydrogenase; expression induced in cells treated with the mycotoxin patulin; members of the AAD gene family comprise three pairs (AAD3 + AAD15, AAD6/AAD16 + AAD4, AAD10 + AAD14) whose two genes are more related to one another than to other members of the family [Source:SGD;Acc:S0…
YHL037C	5.86186	0.145366	0.160039	0.974383	0.329866	0.458824	YHL037C	Putative protein of unknown function; conserved among S. cerevisiae strains [Source:SGD;Acc:S000001029]
YBR178W	3.68172	-0.276617	0.160025	-1.74643	0.0807371	0.148628	YBR178W	Dubious open reading frame; unlikely to encode a functional protein, based on available experimental and comparative sequence data; partially overlaps the verified gene YBR177C [Source:SGD;Acc:S000000382]
YOL154W	107.264	-0.201234	0.159813	-1.27381	0.202732	0.314594	ZPS1	Putative GPI-anchored protein; transcription is induced under low-zinc conditions, as mediated by the Zap1p transcription factor, and at alkaline pH [Source:SGD;Acc:S000005514]
YPR030W	149.731	-0.150982	0.159678	-0.950256	0.341982	0.471715	CSR2	Nuclear ubiquitin protein ligase binding protein; may regulate utilization of nonfermentable carbon sources and endocytosis of plasma membrane proteins; overproduction suppresses chs5 spa2 lethality at high temp; ubiquitinated by Rsp5p, deubiquitinated by Ubp2p; CSR2 has a paralog, ECM21, that arose from the whole genome duplication [Source:SGD;Acc:S000006234]
YJR146W	5.76168	-0.0290771	0.159659	-0.268424	0.788373	0.860747	YJR146W	Protein of unknown function; expressed at both mRNA and protein levels; partially overlaps HMS2 [Source:SGD;Acc:S000003907]
YIR041W	3.92155	0.128553	0.159606	0.770952	0.440735	0.56914	PAU15	Protein of unknown function; member of the seripauperin multigene family encoded mainly in subtelomeric regions; SWAT-GFP and mCherry fusion proteins localize to the vacuole [Source:SGD;Acc:S000001480]
YGR071C	539.556	0.100324	0.159594	0.625734	0.531489	0.652466	ENV11	Protein proposed to be involved in vacuolar functions; mutant shows defect in CPY processing and fragmented vacuoles; deletion mutant has increased glycogen accumulation and displays elongated buds; green fluorescent protein (GFP)-fusion protein localizes to the nucleus; ENV11 has a paralog, VID22, that arose from the whole genome duplication [Source:SGD;Acc:S000003303]
YGL240W	148.735	0.276681	0.159575	1.7248	0.0845643	0.154364	DOC1	Processivity factor; required for the ubiquitination activity of the anaphase promoting complex (APC), mediates the activity of the APC by contributing to substrate recognition; involved in cyclin proteolysis; contains a conserved DOC1 homology domain [Source:SGD;Acc:S000003209]
YMR111C	201.074	-0.0229538	0.159491	-0.161725	0.871522	0.917438	YMR111C	Protein of unknown function; green fluorescent protein (GFP)-fusion protein localizes to the nucleus; YMR111C is not an essential gene; forms nuclear foci upon DNA replication stress [Source:SGD;Acc:S000004717]
YDR231C	158.401	0.584611	0.159429	3.65851	0.000253688	0.0010375	COX20	Mitochondrial inner membrane protein; required for proteolytic processing of Cox2p and its assembly into cytochrome c oxidase [Source:SGD;Acc:S000002639]
YMR114C	151.387	0.536696	0.159381	3.34967	0.000809092	0.00290498	YMR114C	Protein of unknown function; may interact with ribosomes, based on co-purification experiments; green fluorescent protein (GFP)-fusion protein localizes to the nucleus and cytoplasm; YMR114C is not an essential gene [Source:SGD;Acc:S000004720]
tP(UGG)N2	5.6939	0.651444	0.159357	3.01612	0.00256029	0.00791087	tP(UGG)N2	Proline tRNA (tRNA-Pro), predicted by tRNAscan-SE analysis; target of K. lactis zymocin [Source:SGD;Acc:S000006686]
YBR096W	1238.99	0.480797	0.159315	2.99805	0.00271711	0.0083219	YBR096W	Putative protein of unknown function; green fluorescent protein (GFP)-fusion protein localizes to the ER [Source:SGD;Acc:S000000300]
YDR516C	786.12	-0.163569	0.159301	-1.09118	0.275193	0.39708	EMI2	Non-essential protein of unknown function; required for transcriptional induction of the early meiotic-specific transcription factor IME1; required for sporulation; expression regulated by glucose-repression transcription factors Mig1/2p; EMI2 has a paralog, GLK1, that arose from the whole genome duplication; protein abundance increases in response to DNA replication stress [Source:SGD;Acc:S00000…
YPR203W	10.1715	-0.0856595	0.159269	-0.452725	0.650747	0.754708	YPR203W	Putative protein of unknown function [Source:SGD;Acc:S000006407]
YLR410W-B	754.2	0.367927	0.159258	2.30911	0.0209372	0.0477633	YLR410W-B	Retrotransposon TYA Gag and TYB Pol genes; transcribed/translated as one unit; polyprotein is processed to make a nucleocapsid-like protein (Gag), reverse transcriptase (RT), protease (PR), and integrase (IN); similar to retroviral genes [Source:SGD;Acc:S000007380]
YGR096W	217.357	-0.221832	0.159255	-1.39134	0.164122	0.266783	TPC1	Mitochondrial membrane transporter; mediates uptake of the essential cofactor thiamine pyrophosphate (ThPP) into mitochondria; expression appears to be regulated by carbon source; member of the mitochondrial carrier family [Source:SGD;Acc:S000003328]
YHL019W-A	4.44374	-0.0752738	0.159252	-0.478848	0.632047	0.739287	YHL019W-A	Dubious open reading frame; unlikely to encode a functional protein, based on available experimental and comparative sequence data; overlaps the verified gene APM2/YHL019C [Source:SGD;Acc:S000028772]
YHR011W	177.085	-0.130965	0.159243	-0.817601	0.413585	0.541919	DIA4	Probable mitochondrial seryl-tRNA synthetase; mutant displays increased invasive and pseudohyphal growth [Source:SGD;Acc:S000001053]
YNL008C	629.743	0.20049	0.159172	1.2533	0.210095	0.32331	ASI3	Subunit of the inner nuclear membrane Asi ubiquitin ligase complex; Asi complex targets both misfolded proteins of the inner nuclear membrane-associated degradation (INMAD) pathway and regulators of sterol biosynthesis for ubiquitin-mediated degradation; acts with Asi1p and Asi2p to ensure the fidelity of SPS-sensor signaling by targeting latent unprocessed forms of Stp1p and Stp2p, maintaining t…
YPL147W	177.722	0.0515566	0.159103	0.338467	0.735011	0.8236	PXA1	Subunit of heterodimeric peroxisomal ABC transport complex, with Pxa2p; required for import of long-chain fatty acids into peroxisomes; similar to human adrenoleukodystrophy transporters ABCD1and ABCD2, and ALD-related proteins; mutations in ABCD1 cause X-linked adrenoleukodystrophy (X-ALD), a peroxisomal disorder; human ABCD1 and ABCD2 can each partially complement yeast pxa1 pxa2 double null mu…
YIR030C	148.23	-0.258057	0.15902	-1.64923	0.0991002	0.175998	DCG1	Protein of unknown function; expression is sensitive to nitrogen catabolite repression and regulated by Dal80p; contains transmembrane domain [Source:SGD;Acc:S000001469]
YHL006W-A	5.18929	0.572952	0.158941	2.41962	0.0155369	0.0372532	YHL006W-A	Dubious open reading frame; unlikely to encode a functional protein, based on available experimental and comparative sequence data; overlaps ORF STE20/YHL007C [Source:SGD;Acc:S000028771]
YGR183C	1472.76	0.573906	0.158939	3.58822	0.000332946	0.00132129	QCR9	Subunit 9 of ubiquinol cytochrome-c reductase (Complex III); Complex III is a component of the mitochondrial inner membrane electron transport chain; required for electron transfer at the ubiquinol oxidase site of the complex [Source:SGD;Acc:S000003415]
YDR065W	301.99	0.337281	0.158926	2.13155	0.0330438	0.0706686	RRG1	Protein of unknown function; required for vacuolar acidification and mitochondrial genome maintenance; the authentic, non-tagged protein is detected in highly purified mitochondria in high-throughput studies [Source:SGD;Acc:S000002472]
snR49	53.6777	0.0106732	0.158833	0.066595	0.946904	0.966445	snR49	H/ACA box small nucleolar RNA (snoRNA); guides pseudouridylation of large subunit (LSU) rRNA at position U990 and small subunit (SSU) rRNA at positions U120, U211, and U302 [Source:SGD;Acc:S000007460]
YIL066C	125.962	-0.355878	0.158717	-2.25372	0.0242136	0.0541387	RNR3	Minor isoform of large subunit of ribonucleotide-diphosphate reductase; the RNR complex catalyzes rate-limiting step in dNTP synthesis, regulated by DNA replication and DNA damage checkpoint pathways via localization of small subunits; RNR3 has a paralog, RNR1, that arose from the whole genome duplication [Source:SGD;Acc:S000001328]
YML103C	1594.3	-0.0110134	0.158714	-0.069084	0.944923	0.965008	NUP188	Subunit of the inner ring of the nuclear pore complex (NPC); contributes to NPC organization and nucleocytoplasmic transport; homologous to human NUP188 [Source:SGD;Acc:S000004571]
YPR198W	1073.95	0.103885	0.158703	0.63334	0.526512	0.648322	SGE1	Plasma membrane multidrug transporter; member of the major facilitator superfamily; acts as an extrusion permease; partial multicopy suppressor of gal11 mutations [Source:SGD;Acc:S000006402]
YOR367W	232.924	0.233869	0.158693	1.47303	0.140742	0.234906	SCP1	Component of yeast cortical actin cytoskeleton; binds and cross links actin filaments; originally identified by its homology to calponin (contains a calponin-like repeat) but the Scp1p domain structure is more similar to transgelin [Source:SGD;Acc:S000005894]
YCL048W-A	5.31895	0.70874	0.158686	3.54917	0.000386444	0.00150233	YCL048W-A	Putative protein of unknown function; SWAT-GFP and mCherry fusion proteins localize to the cell periphery and vacuole; YCL048W-A has a paralog, YDR524C-B, that arose from the whole genome duplication [Source:SGD;Acc:S000087203]
YOR247W	1918.55	0.722611	0.158622	4.48688	7.22722e-06	4.32966e-05	SRL1	Mannoprotein that exhibits a tight association with the cell wall; required for cell wall stability in the absence of GPI-anchored mannoproteins; has a high serine-threonine content; expression is induced in cell wall mutants; SRL1 has a paralog, SVS1, that arose from the whole genome duplication [Source:SGD;Acc:S000005773]
YPL280W	4.49775	0.387442	0.158498	1.88587	0.0593128	0.115506	HSP32	Possible chaperone and cysteine protease; required for transcriptional reprogramming during the diauxic shift and for survival in stationary phase; similar to E. coli Hsp31 and S. cerevisiae Hsp31p, Hsp33p, and Sno4p; member of the DJ-1/ThiJ/PfpI superfamily, which includes human DJ-1 involved in Parkinson's disease and cancer [Source:SGD;Acc:S000006201]
YPL171C	163.786	-0.392523	0.158468	-2.50534	0.0122335	0.0303737	OYE3	Conserved NADPH oxidoreductase containing flavin mononucleotide (FMN); homologous to Oye2p with different ligand binding and catalytic properties; has potential roles in oxidative stress response and programmed cell death [Source:SGD;Acc:S000006092]
YDL022W	2505.97	-0.475831	0.158466	-3.05249	0.00226948	0.00718154	GPD1	NAD-dependent glycerol-3-phosphate dehydrogenase; key enzyme of glycerol synthesis, essential for growth under osmotic stress; expression regulated by high-osmolarity glycerol response pathway; protein abundance increases in response to DNA replication stress; constitutively inactivated via phosphorylation by the protein kinases Ypk1p and Ypk2p, dephosphorylation increases catalytic activity; for…
YNL253W	459.892	0.120501	0.158406	0.749841	0.45335	0.582324	TEX1	Protein involved in mRNA export; component of the transcription export (TREX) complex [Source:SGD;Acc:S000005197]
YOL086W-A	215.213	0.60383	0.158263	3.79536	0.000147432	0.000639076	MHF1	Component of the heterotetrameric MHF histone-fold complex; in humans the MHF complex interacts with both DNA and Mph1p ortholog FANCM, a Fanconi anemia complementation group protein, to stabilize and remodel blocked replication forks and repair damaged DNA; mhf1 srs2 double mutants are MMS hypersensitive; ortholog of human centromere constitutive-associated network (CCAN) subunit CENP-S, also kn…
YHR209W	328.922	1.35096	0.158258	8.37587	5.48167e-17	1.76029e-15	CRG1	S-AdoMet-dependent methyltransferase involved in lipid homeostasis; mediates resistance to a drug cantharidin [Source:SGD;Acc:S000001252]
YDR417C	4.06621	-0.0616817	0.158192	-0.320791	0.748369	0.834556	YDR417C	Dubious open reading frame; unlikely to encode a functional protein, based on available experimental and comparative sequence data; partially overlaps the verified ORF RPL12B/YDR418W [Source:SGD;Acc:S000002825]
YDR185C	137.612	0.00215407	0.158154	-0.0501235	0.960024	0.97423	UPS3	Mitochondrial protein of unknown function; similar to Ups1p and Ups2p which are involved in regulation of mitochondrial cardiolipin and phosphatidylethanolamine levels; null is viable but interacts synthetically with ups1 and ups2 mutations; UPS3 has a paralog, UPS2, that arose from the whole genome duplication [Source:SGD;Acc:S000002593]
YNL228W	4.44181	0.147582	0.158128	0.791016	0.428935	0.557651	YNL228W	Dubious open reading frame; unlikely to encode a functional protein, based on available experimental and comparative sequence data; almost completely overlaps ORF YNL227C/JJJ1 [Source:SGD;Acc:S000005172]
YLL057C	79.0903	0.165216	0.158126	1.04252	0.297172	0.422594	JLP1	Fe(II)-dependent sulfonate/alpha-ketoglutarate dioxygenase; involved in sulfonate catabolism for use as a sulfur source; contains sequence that resembles a J domain (typified by the E. coli DnaJ protein); induced by sulphur starvation [Source:SGD;Acc:S000003980]
YLR262C-A	1145.39	0.0400539	0.158067	0.250109	0.802503	0.872037	TMA7	Protein of unknown that associates with ribosomes; null mutant exhibits translation defects, altered polyribosome profiles, and resistance to the translation inhibitor anisomcyin; protein abundance increases in response to DNA replication stress [Source:SGD;Acc:S000007246]
YHR210C	123.611	0.32638	0.158053	2.02611	0.042754	0.0876526	YHR210C	Putative aldose 1-epimerase superfamily protein; non-essential gene; highly expressed under anaeorbic conditions [Source:SGD;Acc:S000001253]
YBR005W	1386.99	0.409995	0.158053	2.52247	0.0116533	0.0291403	RCR1	Protein of the ER membrane involved in cell wall chitin deposition; may function in the endosomal-vacuolar trafficking pathway, helping determine whether plasma membrane proteins are degraded or routed to the plasma membrane; RCR1 has a paralog, RCR2, that arose from the whole genome duplication [Source:SGD;Acc:S000000209]
YMR271C	91.722	0.489427	0.158007	3.05824	0.00222639	0.00707205	URA10	Minor orotate phosphoribosyltransferase (OPRTase) isozyme; catalyzes the fifth enzymatic step in the de novo biosynthesis of pyrimidines, converting orotate into orotidine-5'-phosphate; URA10 has a paralog, URA5, that arose from the whole genome duplication [Source:SGD;Acc:S000004884]
YFL030W	138.966	0.410454	0.157859	2.56149	0.0104225	0.0265048	AGX1	Alanine:glyoxylate aminotransferase (AGT); catalyzes the synthesis of glycine from glyoxylate, which is one of three pathways for glycine biosynthesis in yeast; similar to mammalian and plant alanine:glyoxylate aminotransferases; human homolog AGXT complements yeast null mutant [Source:SGD;Acc:S000001864]
YBR240C	73.61	0.174387	0.157843	1.08668	0.27718	0.399124	THI2	Transcriptional activator of thiamine biosynthetic genes; interacts with regulatory factor Thi3p to control expression of thiamine biosynthetic genes with respect to thiamine availability; acts together with Pdc2p to respond to thiaminediphosphate demand, possibly as related to carbon source availability; zinc finger protein of the Zn(II)2Cys6 type [Source:SGD;Acc:S000000444]
YML057C-A	4.23577	0.138372	0.157727	0.894322	0.37115	0.501123	YML057C-A	Dubious open reading frame; unlikely to encode a functional protein, based on available experimental and comparative sequence data; overlaps the verified gene CMP2/YML057W [Source:SGD;Acc:S000004522]
YIL165C	75.1638	0.29031	0.157589	1.82943	0.0673347	0.128238	YIL165C	Putative protein of unknown function; mutant exhibits mitophagy defects; in closely related species and other S. cerevisiae strain backgrounds YIL165C and adjacent ORF, YIL164C, likely constitute a single ORF encoding a nitrilase gene [Source:SGD;Acc:S000001427]
YLR294C	5.99305	0.554007	0.157579	2.68321	0.00729183	0.0194634	YLR294C	Dubious open reading frame; unlikely to encode a functional protein, based on available experimental and comparative sequence data; partially overlaps the verified gene ATP14 [Source:SGD;Acc:S000004285]
YLR271W	116.682	0.485632	0.157579	3.02901	0.00245356	0.00766006	CMG1	Putative protein of unknown function; green fluorescent protein (GFP)-fusion protein localizes to the cytoplasm and the nucleus and is induced in response to the DNA-damaging agent MMS [Source:SGD;Acc:S000004261]
YMR247C	1071.23	-0.19349	0.157576	-1.22453	0.220751	0.335912	RKR1	RING domain E3 ubiquitin ligase; involved in ubiquitin-mediated degradation of non-stop proteins and translationally stalled ER membrane proteins; component of ribosome-bound RQC (ribosome quality control) complex; degrades products of mRNAs lacking a termination codon regardless of a poly(A) tail; functional connections to chromatin modification; homolog of mouse Listerin, mutations in which rep…
YLL067C	6.07122	-0.162637	0.157569	-0.943747	0.345299	0.475041	YLL067C	Putative Y' element ATP-dependent helicase [Source:SGD;Acc:S000003990]
YOR220W	1321.42	0.733811	0.157532	4.58233	4.59826e-06	2.86192e-05	RCN2	Protein of unknown function; green fluorescent protein (GFP)-fusion protein localizes to the cytoplasm; phosphorylated in response to alpha factor; protein abundance increases in response to DNA replication stress [Source:SGD;Acc:S000005746]
YPL189W	101.291	0.0187934	0.157503	0.119291	0.905045	0.939372	GUP2	Probable membrane protein; possible role in proton symport of glycerol; member of the MBOAT family of putative membrane-bound O-acyltransferases; homolog of the mammalian Hedgehog pathway modulator HHAT; GUP2 has a paralog, GUP1, that arose from the whole genome duplication [Source:SGD;Acc:S000006110]
YOR192C	145.637	-0.0159637	0.157483	-0.0987103	0.921368	0.950144	THI72	Transporter of thiamine or related compound; contributes to uptake of 5-aminoimidazole-4-carboxamide-1-beta-D-ribofuranoside (acadesine); shares sequence similarity with Thi7p [Source:SGD;Acc:S000005718]
YGL054C	2588.84	0.697194	0.157437	4.37279	1.22668e-05	7.01248e-05	ERV14	COPII-coated vesicle protein; involved in vesicle formation and incorporation of specific secretory cargo; required for the delivery of bud-site selection protein Axl2p and Nha1p antiporter to cell surface; related to Drosophila cornichon; ERV14 has a paralog, ERV15, that arose from the whole genome duplication [Source:SGD;Acc:S000003022]
YPR050C	4.47609	0.146628	0.157361	0.637653	0.523699	0.646354	YPR050C	Dubious open reading frame; unlikely to encode a functional protein, based on available experimental and comparative sequence data; almost completely overlaps verified ORF MAK3/YPR051W [Source:SGD;Acc:S000006254]
YNL126W	402.479	-0.049599	0.157234	-0.309928	0.756616	0.840922	SPC98	Component of the microtubule-nucleating Tub4p (gamma-tubulin) complex; interacts with Spc110p at the spindle pole body (SPB) inner plaque and with Spc72p at the SPB outer plaque [Source:SGD;Acc:S000005070]
YIL167W	82.18	0.383275	0.15722	2.41107	0.0159059	0.0379931	NA	NA
YPL108W	170.531	0.204305	0.157186	1.27317	0.202959	0.314869	YPL108W	Cytoplasmic protein of unknown function; non-essential gene that is induced in a GDH1 deleted strain with altered redox metabolism; GFP-fusion protein is induced in response to the DNA-damaging agent MMS [Source:SGD;Acc:S000006029]
YER042W	482.443	0.255884	0.157119	1.62534	0.10409	0.183461	MXR1	Methionine-S-sulfoxide reductase; involved in the response to oxidative stress; protects iron-sulfur clusters from oxidative inactivation along with MXR2; involved in the regulation of lifespan; reduced activity of human homolog implicated in Alzheimer disease [Source:SGD;Acc:S000000844]
YIR018W	111.245	0.11573	0.15708	0.749093	0.453801	0.582531	YAP5	Basic leucine zipper (bZIP) iron-sensing transcription factor; involved in diauxic shift; YAP5 has a paralog, YAP7, that arose from the whole genome duplication [Source:SGD;Acc:S000001457]
YDL039C	5092.57	-0.914585	0.157078	-5.87254	4.2917e-09	4.57056e-08	PRM7	Pheromone-regulated protein; predicted to have one transmembrane segment; promoter contains Gcn4p binding elements; in W303 strain one continuous open reading frame comprising of YDL037C, the intergenic region and YDL039C encodes the IMI1 [Source:SGD;Acc:S000002197]
YNL333W	134.302	-0.17919	0.157073	-1.16177	0.24533	0.363553	SNZ2	Member of a stationary phase-induced gene family; transcription of SNZ2 is induced prior to diauxic shift, and also in the absence of thiamin in a Thi2p-dependent manner; forms a coregulated gene pair with SNO2; interacts with Thi11p [Source:SGD;Acc:S000005277]
YBR085W	138.6	-1.32833	0.157019	-8.47749	2.30101e-17	7.7035e-16	AAC3	Mitochondrial inner membrane ADP/ATP translocator; exchanges cytosolic ADP for mitochondrially synthesized ATP; expressed under anaerobic conditions; similar to Aac1p; has roles in maintenance of viability and in respiration; AAC3 has a paralog, PET9, that arose from the whole genome duplication [Source:SGD;Acc:S000000289]
YLR233C	210.136	-0.140943	0.157009	-0.893675	0.371496	0.501221	EST1	TLC1 RNA-associated factor involved in telomere length regulation; recruitment subunit of telomerase; has G-quadruplex promoting activity required for telomere elongation; role in activating telomere-bound Est2p-TLC1-RNA; EST1 has a paralog, EBS1, that arose from the whole genome duplication [Source:SGD;Acc:S000004223]
snR30	227.071	-0.0809292	0.156956	-0.492555	0.622327	0.730878	snR30	H/ACA box small nucleolar RNA (snoRNA); essential gene required for cleavage of 35S primary rRNA transcript to release the precursor to the 18S rRNA [Source:SGD;Acc:S000007497]
YJL137C	167.552	-0.185925	0.156923	-1.20636	0.227677	0.343563	GLG2	Glycogenin glucosyltransferase; self-glucosylating initiator of glycogen synthesis, also glucosylates n-dodecyl-beta-D-maltoside; similar to mammalian glycogenin; GLG2 has a paralog, GLG1, that arose from the whole genome duplication [Source:SGD;Acc:S000003673]
YNL086W	129.993	0.465766	0.156915	2.95625	0.003114	0.0093688	SNN1	Subunit of the BLOC-1 complex involved in endosomal maturation; interacts with Msb3p; green fluorescent protein (GFP)-fusion protein localizes to endosomes [Source:SGD;Acc:S000005030]
YBL096C	5.37414	0.0541562	0.156912	0.230888	0.817402	0.883063	YBL096C	Non-essential protein of unknown function [Source:SGD;Acc:S000000192]
YKL053C-A	370.72	0.169421	0.15691	1.0844	0.278188	0.399805	MDM35	Mitochondrial intermembrane space protein; forms complex with Ups2p that transfers phosphatidylserine from outer membrane to inner membrane for phosphatidylethanolamine synthesis; mutation affects mitochondrial distribution and morphology; contains twin cysteine-x9-cysteine motifs; protein abundance increases in response to DNA replication stress [Source:SGD;Acc:S000007243]
YOR114W	105.799	0.0293624	0.156878	0.187152	0.851541	0.904262	YOR114W	Putative protein of unknown function; null mutant is viable [Source:SGD;Acc:S000005640]
YGL055W	43000.9	-0.224555	0.156828	-1.39536	0.162908	0.265548	OLE1	Delta(9) fatty acid desaturase; required for monounsaturated fatty acid synthesis and for normal distribution of mitochondria [Source:SGD;Acc:S000003023]
YMR081C	310.594	0.0379163	0.156792	0.145408	0.884388	0.92541	ISF1	Serine-rich, hydrophilic protein; overexpression suppresses growth defects of hap2, hap3, and hap4 mutants; expression is under glucose control; cotranscribed with NAM7 in a cyp1 mutant; ISF1 has a paralog, MBR1, that arose from the whole genome duplication [Source:SGD;Acc:S000004686]
YMR001C-A	33.1614	0.0246512	0.156729	0.205458	0.837214	0.896466	YMR001C-A	Putative protein of unknown function [Source:SGD;Acc:S000028691]
YKR033C	4.94318	-0.0619128	0.156697	-0.419084	0.675155	0.776576	YKR033C	Dubious open reading frame; unlikely to encode a functional protein, based on available experimental and comparative sequence data; partially overlaps the verified gene DAL80 [Source:SGD;Acc:S000001741]
YGL047W	165.2	0.708273	0.156687	4.49718	6.88617e-06	4.14355e-05	ALG13	Catalytic component of UDP-GlcNAc transferase; required for the second step of dolichyl-linked oligosaccharide synthesis; anchored to the ER membrane via interaction with Alg14p; similar to bacterial and human glycosyltransferases; protein abundance increases in response to DNA replication stress; both human homologs ALG13 and ALG14 are required to complement yeast alg13 mutant [Source:SGD;Acc:S0…
YOR298C-A	4659.27	0.96544	0.156627	6.18553	6.18953e-10	7.53519e-09	MBF1	Transcriptional coactivator; bridges the DNA-binding region of Gcn4p and TATA-binding protein Spt15p; suppressor of frameshift mutations; protein abundance increases in response to DNA replication stress [Source:SGD;Acc:S000007253]
YOR186W	7.35828	-0.109082	0.156567	-0.547877	0.583777	0.698269	YOR186W	Putative protein of unknown function; proper regulation of expression during heat stress is sphingolipid-dependent; mCherry fusion protein localizes to the vacuole; YOR186W has a paralog, YLR297W, that arose from the whole genome duplication [Source:SGD;Acc:S000005712]
YOL155C	1373.32	1.86666	0.156559	11.8089	3.51083e-32	5.81505e-30	HPF1	Haze-protective mannoprotein; reduces the particle size of aggregated proteins in white wines [Source:SGD;Acc:S000005515]
YER066W	77.8106	0.423554	0.156545	2.6643	0.00771481	0.0204796	RRT13	Putative protein of unknown function; non-essential gene identified in a screen for mutants with decreased levels of rDNA transcription [Source:SGD;Acc:S000000868]
YJR156C	124.79	0.55857	0.156456	3.54706	0.000389553	0.00151349	THI11	Protein involved in synthesis of the thiamine precursor HMP; member of a subtelomeric gene family including THI5, THI11, THI12, and THI13; hydroxymethylpyrimidine is also known as HMP [Source:SGD;Acc:S000003917]
YDR249C	368.319	-0.0957393	0.156449	-0.629255	0.529182	0.650395	YDR249C	Putative protein of unknown function [Source:SGD;Acc:S000002657]
YLR372W	9040.45	-0.0723519	0.156424	-0.460092	0.64545	0.750918	YLR372W	Elongase; involved in fatty acid and sphingolipid biosynthesis; synthesizes very long chain 20-26-carbon fatty acids from C18-CoA primers; involved in regulation of sphingolipid biosynthesis; lethality of the elo2 elo3 double null mutation is functionally complemented by human ELOVL1 and weakly complemented by human ELOVL3 or ELOV7 [Source:SGD;Acc:S000004364]
YGL179C	850.381	0.460287	0.156418	2.88712	0.00388789	0.0113341	TOS3	Protein kinase; related to and functionally redundant with Elm1p and Sak1p for the phosphorylation and activation of Snf1p; functionally orthologous to LKB1, a mammalian kinase associated with Peutz-Jeghers cancer-susceptibility syndrome; TOS3 has a paralog, SAK1, that arose from the whole genome duplication [Source:SGD;Acc:S000003147]
YHR160C	4.78053	0.253729	0.156387	1.74259	0.0814055	0.149596	PEX18	Peroxin; required for targeting of peroxisomal matrix proteins containing PTS2; interacts with Pex7p; partially redundant with Pex21p; primarily responsible for peroxisomal import during growth on oleate, and expression is induced during oleate growth [Source:SGD;Acc:S000001203]
YDL049C	168.63	-0.330932	0.156362	-2.12745	0.0333828	0.071321	KNH1	Protein with similarity to Kre9p; Kre9p is involved in cell wall beta 1,6-glucan synthesis; overproduction suppresses growth defects of a kre9 null mutant; required for propionic acid resistance [Source:SGD;Acc:S000002207]
YLR132C	96.2167	-0.0547907	0.156351	-0.346549	0.72893	0.819558	USB1	Putative poly(U)-specific 3'-to-5' RNA exonuclease; involved in 3'-end processing of U6 snRNA removing uridines and generating a terminal 2&#8242;,3&#8242; cyclic phosphate; essential protein that localizes to the nucleus and mitochondria; overexpression suppresses the respiratory defects of oxa1 and mtf2 mutants; homolog of S.pombe gene, mpn1 and human gene, hUSB1; mutations in hUSB1 are associa…
YLL049W	236.302	0.410962	0.156351	2.61899	0.00881914	0.0230227	LDB18	Component of the dynactin complex; dynactin is required for dynein activity; null mutant exhibits defects in nuclear migration and spindle orientation and has reduced affinity for alcian blue dye; has homology to mammalian dynactin subunit p24 [Source:SGD;Acc:S000003972]
YJL103C	197.294	-0.214946	0.15626	-1.39142	0.164097	0.266783	GSM1	Putative zinc cluster protein of unknown function; proposed to be involved in the regulation of energy metabolism, based on patterns of expression and sequence analysis [Source:SGD;Acc:S000003639]
YMR274C	323.461	-0.0577944	0.156163	-0.377467	0.705827	0.802325	RCE1	Type II CAAX prenyl protease; involved in the proteolysis and maturation of Ras and the a-factor mating pheromone [Source:SGD;Acc:S000004887]
YKL167C	416.061	0.0945151	0.156141	0.60744	0.543559	0.663659	MRP49	Mitochondrial ribosomal protein of the large subunit; not essential for mitochondrial translation [Source:SGD;Acc:S000001650]
YDR277C	171.363	-0.0191472	0.156141	-0.100226	0.920165	0.94974	MTH1	Negative regulator of the glucose-sensing signal transduction pathway; required for repression of transcription by Rgt1p; interacts with Rgt1p and the Snf3p and Rgt2p glucose sensors; phosphorylated by Yck1p, triggering Mth1p degradation; MTH1 has a paralog, STD1, that arose from the whole genome duplication [Source:SGD;Acc:S000002685]
YLR307C-A	7.82027	0.822582	0.156089	4.09745	4.17725e-05	0.000209495	YLR307C-A	Putative protein of unknown function [Source:SGD;Acc:S000028525]
YDR014W	205.561	0.347903	0.156083	2.22732	0.0259262	0.0574373	RAD61	Subunit of a complex that inhibits sister chromatid cohesion; also negatively regulates chromosome condensation; inhibited by Eco1p-acetylated cohesin subunits Smc3p and Mcd1p; binds Smc3p ATPase head of cohesin; related to the human Wapl protein that controls the association of cohesin with chromatin [Source:SGD;Acc:S000002421]
YKL057C	1714.29	0.0797562	0.15607	0.509815	0.610181	0.72027	NUP120	Subunit of the Nup84p subcomplex of the nuclear pore complex (NPC); contributes to nucleocytoplasmic transport and NPC biogenesis and is involved in establishment of a normal nucleocytoplasmic concentration gradient of the GTPase Gsp1p; also plays roles in several processes that may require localization of genes or chromosomes at the nuclear periphery, including double-strand break repair, transc…
YPL096C-A	131.794	0.0573586	0.15603	0.368128	0.712778	0.807456	ERI1	Endoplasmic reticulum membrane protein that binds and inhibits Ras2p; binds to and inhibits GTP-bound Ras2p at the endoplasmic reticulum (ER); component of the GPI-GnT complex which catalyzes the first step in GPI-anchor biosynthesis; probable homolog of mammalian PIG-Y protein [Source:SGD;Acc:S000028423]
YPL279C	152.127	0.0280158	0.156029	0.161031	0.872069	0.91786	FEX2	Protein involved in fluoride export; nearly identical to FEX1, and deletion of both proteins results in a large increase in fluoride sensitivity compared with the single mutant; contains two FEX domains connected by a linker; part of a widespread family of conserved fluoride export proteins [Source:SGD;Acc:S000006200]
YDL110C	226.519	0.6545	0.155959	4.19034	2.78532e-05	0.000146947	TMA17	ATPase dedicated chaperone that adapts proteasome assembly to stress; Tma17p is induced upon stress; interacts with Rpt6p to assist its pairing to Rpt3p and early steps in proteasome biogenesis; associates with ribosomes; heterozygous deletion demonstrated increases in chromosome instability in a rad9 deletion background; protein abundance is decreased upon intracellular iron depletion [Source:SG…
YNR063W	179.714	-0.352374	0.155914	-2.26624	0.0234366	0.0526444	YNR063W	Putative zinc-cluster protein of unknown function [Source:SGD;Acc:S000005346]
YOL104C	197.833	0.126147	0.155845	0.808589	0.418751	0.547263	NDJ1	Protein that regulates meiotic SPB cohesion and telomere clustering; localizes to both spindle pole bodies (SPBs) and telomeres; required for bouquet formation, effective homolog pairing, ordered cross-over distribution, sister chromatid cohesion at meiotic telomeres, chromosomal segregation and telomere-led rapid prophase movement [Source:SGD;Acc:S000005464]
YLR376C	76.6004	0.270352	0.155836	1.71269	0.0867692	0.157664	PSY3	Component of Shu complex (aka PCSS complex); Shu complex also includes Shu1, Csm2, Shu2, and promotes error-free DNA repair; promotes Rad51p filament assembly; Shu complex mediates inhibition of Srs2p function; Psy3p and Csm2p contain similar DNA-binding regions which work together to form a single DNA binding site; deletion of PSY3 results in a mutator phenotype; deletion increases sensitivity t…
YGR150C	671.651	-0.294026	0.155827	-1.89409	0.0582129	0.113645	CCM1	Mitochondrial 15S rRNA-binding protein; required for intron removal of COB and COX1 pre-mRNAs; has separable roles in stabilizing mitochondrial 15S rRNA and in maturation of the COB and COX1 mRNAs; contains pentatricopeptide repeat (PPR) motifs; mutant is respiratory deficient and has defective plasma membrane electron transport [Source:SGD;Acc:S000003382]
YDR512C	254.776	0.752677	0.155669	4.78523	1.70796e-06	1.17614e-05	EMI1	Non-essential protein of unknown function; required for transcriptional induction of the early meiotic-specific transcription factor IME1, also required for sporulation; contains twin cysteine-x9-cysteine motifs; deletion affects mitochondrial morphology [Source:SGD;Acc:S000002920]
YPL238C	6.01212	0.153996	0.155663	0.813779	0.415772	0.543821	YPL238C	Dubious open reading frame; unlikely to encode a functional protein, based on available experimental and comparative sequence data; partially overlaps 5' end of the verified essential gene SUI3/YPL237W [Source:SGD;Acc:S000006159]
YAL063C	135.659	0.48745	0.155574	3.12729	0.00176428	0.00579562	FLO9	Lectin-like protein with similarity to Flo1p; thought to be expressed and involved in flocculation [Source:SGD;Acc:S000000059]
YGR075C	157.964	0.471812	0.155564	2.99825	0.00271532	0.00832047	PRP38	Unique component of the U4/U6.U5 tri-snRNP particle; tri-snRNP is required for conformational changes which result in the catalytic activation of the spliceosome; dispensable for spliceosome assembly [Source:SGD;Acc:S000003307]
YHR075C	104.973	-0.103236	0.155557	-0.654495	0.512793	0.637094	PPE1	Protein with carboxyl methyl esterase activity; may have a role in demethylation of the phosphoprotein phosphatase catalytic subunit; also identified as a small subunit mitochondrial ribosomal protein [Source:SGD;Acc:S000001117]
YNL160W	5073.24	0.235459	0.155488	1.48882	0.136536	0.229161	YGP1	Cell wall-related secretory glycoprotein; induced by nutrient deprivation-associated growth arrest and upon entry into stationary phase; may be involved in adaptation prior to stationary phase entry; YGP1 has a paralog, SPS100, that arose from the whole genome duplication [Source:SGD;Acc:S000005104]
YGR018C	5.91206	0.113422	0.155485	0.597351	0.550273	0.669389	YGR018C	Protein of unknown function; mRNA identified as translated by ribosome profiling data; partially overlaps the uncharacterized ORF YGR017W [Source:SGD;Acc:S000003250]
YFR032C-A	1898.04	0.132492	0.155482	0.850172	0.395229	0.525359	RPL29	Ribosomal 60S subunit protein L29; not essential for translation, but required for proper joining of large and small ribosomal subunits and for normal translation rate; homologous to mammalian ribosomal protein L29, no bacterial homolog [Source:SGD;Acc:S000006437]
YIL134C-A	4.31206	0.0315368	0.15548	0.163298	0.870284	0.916837	YIL134C-A	Putative protein of unknown function; identified by fungal homology and RT-PCR [Source:SGD;Acc:S000028556]
YIL045W	148.774	-0.155374	0.15548	-1.05036	0.293554	0.418299	PIG2	Putative type-1 protein phosphatase targeting subunit; tethers Glc7p type-1 protein phosphatase to Gsy2p glycogen synthase; PIG2 has a paralog, GIP2, that arose from the whole genome duplication [Source:SGD;Acc:S000001307]
YPL055C	239.981	-0.445091	0.155431	-2.88814	0.00387523	0.0113025	LGE1	Protein of unknown function; null mutant forms abnormally large cells, and homozygous diploid null mutant displays delayed premeiotic DNA synthesis and reduced efficiency of meiotic nuclear division [Source:SGD;Acc:S000005976]
YNL214W	123.442	-0.122822	0.155378	-0.783285	0.43346	0.562283	PEX17	Membrane peroxin of the peroxisomal importomer complex; complex facilitates the import of peroxisomal matrix proteins; required for peroxisome biogenesis [Source:SGD;Acc:S000005158]
YDL105W	132.107	-0.137787	0.155297	-0.894554	0.371026	0.501123	NSE4	Component of the SMC5-SMC6 complex; this complex plays a key role in the removal of X-shaped DNA structures that arise between sister chromatids during DNA replication and repair [Source:SGD;Acc:S000002263]
YIL136W	344.781	0.283204	0.155251	1.76191	0.0780847	0.144932	OM45	Mitochondrial outer membrane protein of unknown function; major constituent of the outer membrane, extending into the intermembrane space; interacts with porin (Por1p) and with Om14p; imported via the presequence pathway involving the TOM and TIM23 complexes, then assembled in the outer membrane by Mim1p; protein abundance increases in response to DNA replication stress [Source:SGD;Acc:S000001398]
YIL058W	4.03607	0.342022	0.155247	1.68774	0.0914606	0.165275	YIL058W	Dubious open reading frame; unlikely to encode a functional protein, based on available experimental and comparative sequence data [Source:SGD;Acc:S000001320]
YNL077W	369.202	-0.193367	0.155215	-1.22015	0.22241	0.337394	APJ1	Chaperone with a role in SUMO-mediated protein degradation; member of the DnaJ-like family; conserved across eukaryotes; overexpression interferes with propagation of the [Psi+] prion; the authentic, non-tagged protein is detected in highly purified mitochondria in high-throughput studies; forms nuclear foci upon DNA replication stress [Source:SGD;Acc:S000005021]
YMR316C-B	114.229	0.0526402	0.155213	0.355127	0.722495	0.815089	YMR316C-B	Dubious open reading frame; unlikely to encode a functional protein, based on available experimental and comparative sequence data; almost completely overlaps 5' end of ORF YMR317W [Source:SGD;Acc:S000004934]
YHL047C	1042.48	-0.511513	0.155208	-3.33386	0.00085651	0.00306126	ARN2	Transporter; member of the ARN family of transporters that specifically recognize siderophore-iron chelates; responsible for uptake of iron bound to the siderophore triacetylfusarinine C [Source:SGD;Acc:S000001039]
YNL200C	232.401	0.314021	0.155204	1.97482	0.048289	0.0975416	NNR1	NADHX epimerase; catalyzes isomerization of (R)- and (S)-NADHX; homologous to AIBP in mammals and the N- terminal domain of YjeF in E.coli; enzyme is widespread in eukaryotes, prokaryotes and archaea; the authentic, non-tagged protein is detected in highly purified mitochondria in high-throughput studies [Source:SGD;Acc:S000005144]
YER111C	404.363	0.0766547	0.15508	0.495323	0.620372	0.729572	SWI4	DNA binding component of the SBF complex (Swi4p-Swi6p); a transcriptional activator that in concert with MBF (Mbp1-Swi6p) regulates late G1-specific transcription of targets including cyclins and genes required for DNA synthesis and repair; Slt2p-independent regulator of cold growth; acetylation at two sites, K1016 and K1066, regulates interaction with Swi6p [Source:SGD;Acc:S000000913]
YPL132W	392.42	-0.429046	0.155058	-2.76136	0.00575612	0.015869	COX11	Protein required for delivery of copper to Cox1p; mitochondrial inner membrane protein; association with mitochondrial ribosomes suggests that copper delivery may occur during translation of Cox1p [Source:SGD;Acc:S000006053]
YGL102C	4.69119	-0.0466164	0.155038	-0.221799	0.82447	0.887956	YGL102C	Dubious open reading frame unlikely to encode a functional protein; overlaps 3' end of essential RPL28 gene encoding a large subunit ribosomal protein [Source:SGD;Acc:S000003070]
YGL127C	365.711	-0.254527	0.154978	-1.65974	0.0969675	0.173237	SOH1	Subunit of the RNA polymerase II mediator complex; associates with core polymerase subunits to form the RNA polymerase II holoenzyme; involved in telomere maintenance; conserved with other metazoan MED31 subunits [Source:SGD;Acc:S000003095]
YDR079C-A	160.04	0.45752	0.154955	2.91042	0.00360942	0.0106356	TFB5	Component of RNA polymerase II general transcription factor TFIIH; involved in transcription initiation and in nucleotide-excision repair; relocalizes to the cytosol in response to hypoxia; homolog of Chlamydomonas reinhardtii REX1-S protein involved in DNA repair [Source:SGD;Acc:S000007603]
YAL028W	86.6024	0.261634	0.154945	1.67597	0.093745	0.168725	FRT2	Tail-anchored ER membrane protein of unknown function; interacts with homolog Frt1p; promotes growth in conditions of high Na+, alkaline pH, or cell wall stress, possibly via a role in posttranslational translocation; potential Cdc28p substrate; FRT2 has a paralog, FRT1, that arose from the whole genome duplication [Source:SGD;Acc:S000000026]
YLR360W	314.416	0.118326	0.154911	0.763792	0.444991	0.573342	VPS38	Part of a Vps34p phosphatidylinositol 3-kinase complex; functions in carboxypeptidase Y (CPY) sorting; binds Vps30p and Vps34p to promote production of phosphatidylinositol 3-phosphate (PtdIns3P) which stimulates kinase activity; required for overflow degradation of misfolded proteins when ERAD is saturated [Source:SGD;Acc:S000004352]
YDL016C	6.88247	-0.0237588	0.154874	-0.135623	0.89212	0.93056	YDL016C	Dubious open reading frame; unlikely to encode a functional protein, based on available experimental and comparative sequence data; partially overlaps the verified ORF CDC7/YDL153C, the catalytic subunit of a complex that regulates DNA replication [Source:SGD;Acc:S000002174]
YNL297C	932.282	-0.103464	0.154872	-0.670092	0.502799	0.628215	MON2	Protein with a role in endocytosis and vacuole integrity; peripheral membrane protein; interacts with and negatively regulates Arl1p; localizes to the endosome; member of the Sec7p family of proteins [Source:SGD;Acc:S000005241]
YDR453C	118.791	0.41287	0.154864	2.60249	0.00925505	0.0239127	TSA2	Stress inducible cytoplasmic thioredoxin peroxidase; cooperates with Tsa1p in the removal of reactive oxygen, nitrogen and sulfur species using thioredoxin as hydrogen donor; deletion enhances the mutator phenotype of tsa1 mutants; protein abundance increases in response to DNA replication stress; TSA2 has a paralog, TSA1, that arose from the whole genome duplication [Source:SGD;Acc:S000002861]
YCR095C	365.024	0.5537	0.154801	3.55183	0.000382556	0.0014909	OCA4	Cytoplasmic protein required for replication of Brome mosaic virus; S. cerevisiae is a model system for studying replication of positive-strand RNA viruses in their natural hosts [Source:SGD;Acc:S000000691]
YIR018C-A	3.5907	0.64834	0.154768	3.05798	0.00222836	0.00707277	YIR018C-A	Putative protein of unknown function; identified by expression profiling and mass spectrometry [Source:SGD;Acc:S000028837]
YOL026C	222.208	0.0225575	0.154747	0.148093	0.88227	0.924614	MIM1	Mitochondrial protein required for outer membrane protein import; cooperates with Tom70p to import the subset of proteins with multiple alpha-helical transmembrane segments, including Ugo1p, Tom20p, and others; present in a complex with Mim2p in the outer membrane that may create a local environment to facilitate membrane insertion of substrate proteins; also has a role in assembly of Tom20p into…
YDL206W	415.614	0.298944	0.154661	1.91848	0.0550503	0.10878	YDL206W	Putative protein of unknown function; YDL206W is not an essential protein [Source:SGD;Acc:S000002365]
YLR251W	114.806	0.217632	0.154635	1.4711	0.141265	0.235654	SYM1	Protein required for ethanol metabolism; induced by heat shock and localized to the inner mitochondrial membrane; homologous to mammalian peroxisomal membrane protein Mpv17; human homolog MPV17 is implicated in hepatocerebral mtDNA depletion syndromes (MDDS), and complements yeast null mutant [Source:SGD;Acc:S000004241]
YOL106W	4.40593	0.113537	0.154607	0.55895	0.576196	0.692035	YOL106W	Dubious open reading frame; unlikely to encode a functional protein, based on available experimental and comparative sequence data [Source:SGD;Acc:S000005466]
YFR008W	141.346	0.207134	0.154573	1.34104	0.179909	0.285398	FAR7	Protein involved in recovery from pheromone-induced cell cycle arrest; acts in a Far1p-independent pathway; interacts with Far3p, Far8p, Far9p, Far10p, and Far11p; protein abundance increases in response to DNA replication stress [Source:SGD;Acc:S000001904]
YER081W	1468.55	-0.753171	0.154569	-4.89775	9.69406e-07	6.94135e-06	SER3	3-phosphoglycerate dehydrogenase and alpha-ketoglutarate reductase; 3PG dehydrogenase that catalyzes the first step in serine and glycine biosynthesis; also functions as an alpha-ketoglutarate reductase, converting alpha-ketoglutarate to D-2-hydroxyglutarate (D-2HG); localizes to the cytoplasm; SER3 has a paralog, SER33, that arose from the whole genome duplication [Source:SGD;Acc:S000000883]
YCR045W-A	271.653	0.18936	0.154541	1.22287	0.221379	0.336398	YCR045W-A	Dubious open reading frame; unlikely to encode a functional protein, based on available experimental and comparative sequence data; completely overlaps with YCR045C; identified by gene-trapping, microarray expression analysis, and genome-wide homology searching [Source:SGD;Acc:S000028607]
YPL120W	271.724	0.229848	0.15453	1.48745	0.136895	0.229581	VPS30	Subunit of phosphatidylinositol (PtdIns) 3-kinase complexes I and II; Complex I is essential in autophagy, Complex II is required for vacuolar protein sorting; required for overflow degradation of misfolded proteins when ERAD is saturated; C-terminus has novel globular fold essential for autophagy through the targeting of the PI3-kinase complex I to the pre-autophagosomal structure; ortholog of h…
YBR012W-B	2.85215	0.127836	0.154525	0.748155	0.454367	0.582797	YBR012W-B	Retrotransposon TYA Gag and TYB Pol genes; transcribed/translated as one unit; polyprotein is processed to make a nucleocapsid-like protein (Gag), reverse transcriptase (RT), protease (PR), and integrase (IN); similar to retroviral genes [Source:SGD;Acc:S000002155]
YOL084W	151.861	0.292324	0.154483	1.83561	0.0664158	0.126788	PHM7	Protein of unknown function; expression is regulated by phosphate levels; green fluorescent protein (GFP)-fusion protein localizes to the cell periphery and vacuole; protein abundance increases in response to DNA replication stress [Source:SGD;Acc:S000005444]
YOL058W	10048.8	-1.45045	0.154457	-9.4853	2.41692e-21	1.23676e-19	ARG1	Arginosuccinate synthetase; catalyzes the formation of L-argininosuccinate from citrulline and L-aspartate in the arginine biosynthesis pathway; potential Cdc28p substrate [Source:SGD;Acc:S000005419]
YBL078C	123.798	0.465315	0.154411	3.01297	0.00258703	0.00798565	ATG8	Component of autophagosomes and Cvt vesicles; regulator of Atg1p, targets it to autophagosomes; binds the Atg1p-Atg13p complex, triggering its vacuolar degradation; unique ubiquitin-like protein whose conjugation target is lipid phosphatidylethanolamine (PE); Atg8p-PE is anchored to membranes, is involved in phagophore expansion, and may mediate membrane fusion during autophagosome formation; dec…
YFL002W-A	3.74749	-0.0318057	0.154359	-0.201617	0.840216	0.898305	YFL002W-A	Retrotransposon TYA Gag and TYB Pol genes; transcribed/translated as one unit; polyprotein is processed to make a nucleocapsid-like protein (Gag), reverse transcriptase (RT), protease (PR), and integrase (IN); similar to retroviral genes [Source:SGD;Acc:S000002962]
YPR166C	466.198	-0.0330446	0.15435	-0.20184	0.840042	0.898271	MRP2	Mitochondrial ribosomal protein of the small subunit [Source:SGD;Acc:S000006370]
YFR034W-A	189.826	0.697078	0.15427	4.47659	7.58447e-06	4.52051e-05	YFR034W-A	Dubious open reading frame; unlikely to encode a functional protein, based on available experimental and comparative sequence data; partially overlaps YFR035C; identified by gene-trapping, microarray expression analysis, and genome-wide homology searching [Source:SGD;Acc:S000028631]
YCR087C-A	922.18	0.373034	0.154255	2.41137	0.0158926	0.0379756	YCR087C-A	Putative protein of unknown function; green fluorescent protein (GFP)-fusion protein localizes to the nucleolus; YCR087C-A is not an essential gene [Source:SGD;Acc:S000007223]
YDR254W	168.592	0.1791	0.154253	1.17132	0.241468	0.359206	CHL4	Outer kinetochore protein required for chromosome stability; involved in new kinetochore assembly and sister chromatid cohesion; forms a stable complex with Iml3p; peripheral component of the Ctf19 kinetochore complex that interacts with Ctf19p, Ctf3p, and Mif2p; required for the spindle assembly checkpoint; orthologous to human centromere constitutive-associated network (CCAN) subunit CENP-N and…
YMR228W	306.227	0.105742	0.154165	0.666937	0.504812	0.630039	MTF1	Mitochondrial RNA polymerase specificity factor; has structural similarity to S-adenosylmethionine-dependent methyltransferases and functional similarity to bacterial sigma-factors; Mtf1p interacts with and stabilizes the Rpo41p-promoter complex, enhancing DNA bending and melting to facilitate pre-initiation open complex formation [Source:SGD;Acc:S000004841]
YDR424C	252.314	0.441135	0.154139	2.8445	0.00444814	0.0127199	DYN2	Cytoplasmic light chain dynein, microtubule motor protein; required for intracellular transport and cell division; involved in mitotic spindle positioning; forms complex with dynein intermediate chain Pac11p that promotes Dyn1p homodimerization, potentiates motor processivity; Dyn2p-Pac11p complex important for interaction of dynein motor complex with dynactin complex; acts as molecular glue to d…
YEL066W	346.045	0.086758	0.154078	0.563027	0.573417	0.689941	HPA3	D-Amino acid N-acetyltransferase that detoxifies D-amino acids; catalyzes N-acetylation of D-amino acids through ordered bi-bi mechanism in which acetyl-CoA is first substrate bound and CoA is last product liberated; acetylates histones and polyamines, also autoacetylates [Source:SGD;Acc:S000000792]
YLR423C	104.456	-0.308683	0.154043	-2.00772	0.0446734	0.090995	ATG17	Scaffold protein responsible for phagophore assembly site organization; regulatory subunit of an autophagy-specific complex that includes Atg1p and Atg13p; stimulates Atg1p kinase activity; human ortholog RB1CC1/FIP200 interacts with p53, which inhibits autophagy in human cells [Source:SGD;Acc:S000004415]
YGR035C	156.752	-0.289707	0.154002	-1.86337	0.0624095	0.120743	YGR035C	Putative protein of unknown function, potential Cdc28p substrate; transcription is activated by paralogous transcription factors Yrm1p and Yrr1p along with genes involved in multidrug resistance; YGR035C has a paralog, YLR346C, that arose from the whole genome duplication [Source:SGD;Acc:S000003267]
YMR068W	124.81	0.427257	0.153972	2.77191	0.00557278	0.0154584	AVO2	Component of a complex containing the Tor2p kinase and other proteins; complex may have a role in regulation of cell growth [Source:SGD;Acc:S000004672]
YBL039W-B	103.067	0.822683	0.153948	5.27579	1.32183e-07	1.1078e-06	YBL039W-B	Putative protein of unknown function; mCherry fusion protein localizes to the vacuole [Source:SGD;Acc:S000028517]
YDR058C	105.38	0.813259	0.153749	5.20451	1.94505e-07	1.5776e-06	TGL2	Triacylglycerol lipase that is localized to the mitochondria; has lipolytic activity towards triacylglycerols and diacylglycerols when expressed in E. coli [Source:SGD;Acc:S000002465]
YGL152C	3.44754	-0.027709	0.153717	-0.0704201	0.943859	0.964548	YGL152C	Dubious open reading frame; unlikely to encode a functional protein, based on available experimental and comparative sequence data; partially overlaps the verified ORF PEX14/YGL153W [Source:SGD;Acc:S000003120]
YMR120C	178.367	1.69772	0.153708	10.7876	3.94036e-27	4.2035e-25	ADE17	Enzyme of 'de novo' purine biosynthesis; contains both 5-aminoimidazole-4-carboxamide ribonucleotide transformylase and inosine monophosphate cyclohydrolase activities; ADE17 has a paralog, ADE16, that arose from the whole genome duplication; ade16 ade17 mutants require adenine and histidine [Source:SGD;Acc:S000004727]
YDL200C	156.827	0.440539	0.153703	2.83313	0.00460941	0.0131274	MGT1	DNA repair methyltransferase (6-O-methylguanine-DNA methylase); involved in protection against DNA alkylation damage [Source:SGD;Acc:S000002359]
YPL174C	342.181	-0.0722839	0.153674	-0.457575	0.647258	0.752186	NIP100	Large subunit of the dynactin complex; dynactin is involved in partitioning the mitotic spindle between mother and daughter cells; putative ortholog of mammalian p150(glued) [Source:SGD;Acc:S000006095]
YLR076C	4.22925	0.387865	0.153555	1.87535	0.0607447	0.117784	YLR076C	Dubious open reading frame; unlikely to encode a functional protein, based on available experimental and comparative sequence data; partially overlaps the essential gene RPL10 which encodes the ribosomal protein L10 [Source:SGD;Acc:S000004066]
YDL139C	114.458	0.581544	0.153544	3.77424	0.000160495	0.000690941	SCM3	Nonhistone component of centromeric chromatin; binds to histone H3 variant, Cse4p, and recruits it to centromeres; involved in the assembly and maintenance of Cse4-H4 at centromeres; required for kinetochore assembly and G2/M progression; may protect Cse4p from ubiquitination; homolog of mammalian HJURP [Source:SGD;Acc:S000002298]
YPL003W	180.701	0.21314	0.153511	1.41767	0.156287	0.256335	ULA1	Protein that activates Rub1p (NEDD8) before neddylation; acts together with Uba3p; may play a role in protein degradation [Source:SGD;Acc:S000005924]
YPL272C	137.931	0.333592	0.153496	2.15609	0.0310765	0.0671458	PBI1	Putative protein of unknown function; gene expression induced in response to ketoconazole; YPL272C is not an essential gene [Source:SGD;Acc:S000006193]
YJL207C	1039.07	-0.191301	0.153472	-1.24108	0.214577	0.328546	LAA1	AP-1 accessory protein; colocalizes with clathrin to the late-Golgi apparatus; involved in TGN-endosome transport; physically interacts with AP-1; similar to the mammalian p200; may interact with ribosomes; YJL207C is a non-essential gene [Source:SGD;Acc:S000003743]
YBR213W	220.659	-0.632472	0.153454	-4.17323	3.00305e-05	0.000157379	MET8	Bifunctional dehydrogenase and ferrochelatase; involved in the biosynthesis of siroheme, a prosthetic group used by sulfite reductase; required for sulfate assimilation and methionine biosynthesis [Source:SGD;Acc:S000000417]
YPR046W	127.577	0.638982	0.153433	4.10716	4.00556e-05	0.000202173	MCM16	Component of the Ctf19 complex and the COMA subcomplex; involved in kinetochore-microtubule mediated chromosome segregation; binds to centromere DNA; orthologous to human centromere constitutive-associated network (CCAN) subunit CENP-H and fission yeast fta3 [Source:SGD;Acc:S000006250]
YJL106W	131.913	0.375597	0.153292	2.4382	0.0147606	0.0357045	IME2	Serine/threonine protein kinase involved in activation of meiosis; associates with Ime1p and mediates its stability, activates Ndt80p; IME2 expression is positively regulated by Ime1p; human CDK2 can complement ime2 null mutant [Source:SGD;Acc:S000003642]
YDR374W-A	151.723	0.629352	0.153282	4.08634	4.38239e-05	0.000218564	WIP1	Kinetochore localized protein of unknown function; interacts with Cnn1p (CENP-T); orthologous to human centromere constitutive-associated network (CCAN) subunit CENP-W and fission yeast new1 [Source:SGD;Acc:S000113553]
YDL114W-A	4.11691	0.265192	0.153229	1.30637	0.191427	0.300833	YDL114W-A	Dubious open reading frame; unlikely to encode a functional protein, based on available experimental and comparative sequence data; identified based on homology to hemiascomycetous yeasts [Source:SGD;Acc:S000007598]
YGR106C	4130.21	-0.0699085	0.153193	-0.455563	0.648704	0.75331	VOA1	ER protein that functions in assembly of the V0 sector of V-ATPase; functions with other assembly factors; null mutation enhances the vacuolar ATPase (V-ATPase) deficiency of a vma21 mutant impaired in endoplasmic reticulum (ER) retrieval [Source:SGD;Acc:S000003338]
YBL064C	474.592	1.22884	0.153176	7.9383	2.04978e-15	5.51339e-14	PRX1	Mitochondrial peroxiredoxin with thioredoxin peroxidase activity; has a role in reduction of hydroperoxides; reactivation requires Trr2p and glutathione; induced during respiratory growth and oxidative stress; phosphorylated; protein abundance increases in response to DNA replication stress [Source:SGD;Acc:S000000160]
YHR173C	4.70765	0.0251193	0.153108	0.22985	0.818208	0.883631	YHR173C	Protein of unknown function; expressed at both mRNA and protein levels; SWAT-GFP and mCherry fusion proteins localize to the vacuole [Source:SGD;Acc:S000001216]
YOR195W	559.149	0.111053	0.153105	0.718252	0.472602	0.599105	SLK19	Kinetochore-associated protein; required for chromosome segregation and kinetochore clustering; required for normal segregation of chromosomes in meiosis and mitosis; component of the FEAR regulatory network, which promotes Cdc14p release from the nucleolus during anaphase; potential Cdc28p substrate [Source:SGD;Acc:S000005721]
YOL016C	7365.04	0.162144	0.153082	0.978332	0.32791	0.45681	CMK2	Calmodulin-dependent protein kinase; may play a role in stress response, many CA++/calmodulan dependent phosphorylation substrates demonstrated in vitro, amino acid sequence similar to mammalian Cam Kinase II; CMK2 has a paralog, CMK1, that arose from the whole genome duplication [Source:SGD;Acc:S000005376]
YDL234C	1775.19	0.0900887	0.153059	0.508924	0.610805	0.720872	GYP7	GTPase-activating protein for yeast Rab family members; members include Ypt7p (most effective), Ypt1p, Ypt31p, and Ypt32p (in vitro); involved in vesicle mediated protein trafficking; contains a PH-like domain [Source:SGD;Acc:S000002393]
YDL211C	123.29	-0.492276	0.153038	-3.25575	0.00113095	0.00391495	YDL211C	Protein of unknown function; green fluorescent protein (GFP)-fusion protein localizes to the vacuole; YDL211C has a paralog, TDA7, that arose from the whole genome duplication [Source:SGD;Acc:S000002370]
YNR001C	2819.82	0.348688	0.153037	2.29092	0.0219679	0.049718	CIT1	Citrate synthase; catalyzes the condensation of acetyl coenzyme A and oxaloacetate to form citrate; the rate-limiting enzyme of the TCA cycle; nuclear encoded mitochondrial protein; CIT1 has a paralog, CIT2, that arose from the whole genome duplication [Source:SGD;Acc:S000005284]
YJL049W	227.856	0.301085	0.153015	1.96549	0.0493573	0.0993143	CHM7	Yeast homolog of human CHMP7, localizes to the endoplasmic reticulum presumably as part of an ESCRT-III like complex; null mutant has growth defect at 37 C in an apq12 deletion background; non-essential gene [Source:SGD;Acc:S000003585]
YAL062W	136.236	-0.19697	0.152975	-1.3075	0.191043	0.30053	GDH3	NADP(+)-dependent glutamate dehydrogenase; synthesizes glutamate from ammonia and alpha-ketoglutarate; rate of alpha-ketoglutarate utilization differs from Gdh1p; expression regulated by nitrogen and carbon sources; GDH3 has a paralog, GDH1, that arose from the whole genome duplication [Source:SGD;Acc:S000000058]
YJR003C	786.115	0.294486	0.152957	1.9147	0.0555311	0.109367	MRX12	Protein that associates with mitochondrial ribosome; detected in highly purified mitochondria in high-throughput studies; predicted to be involved in ribosome biogenesis [Source:SGD;Acc:S000003763]
YPL016W	578.191	-0.585882	0.15291	-3.83958	0.000123247	0.000545895	SWI1	Subunit of the SWI/SNF chromatin remodeling complex; regulates transcription by remodeling chromatin; required for transcription of many genes, including ADH1, ADH2, GAL1, HO, INO1 and SUC2; self-assembles to form [SWI+] prion and to alter expression pattern; human homolog ARID1A is a candidate tumor suppressor gene in breast cancer [Source:SGD;Acc:S000005937]
YMR011W	5783.58	-0.142437	0.152852	-0.892071	0.372355	0.501768	HXT2	High-affinity glucose transporter of the major facilitator superfamily; expression is induced by low levels of glucose and repressed by high levels of glucose [Source:SGD;Acc:S000004613]
YBR067C	4429.26	-0.0247404	0.152834	-0.153084	0.878332	0.921831	TIP1	Major cell wall mannoprotein with possible lipase activity; transcription is induced by heat- and cold-shock; member of the Srp1p/Tip1p family of serine-alanine-rich proteins [Source:SGD;Acc:S000000271]
YHR037W	1303.68	-0.0399584	0.152809	-0.355381	0.722304	0.81502	PUT2	Delta-1-pyrroline-5-carboxylate dehydrogenase; nuclear-encoded mitochondrial protein involved in utilization of proline as sole nitrogen source; deficiency of human homolog ALDH4A1 causes type II hyperprolinemia (HPII), an autosomal recessive inborn error of metabolism; human homolog ALDH4A1 can complement yeast null mutant [Source:SGD;Acc:S000001079]
YMR056C	192.944	0.63178	0.152726	4.11435	3.88265e-05	0.000196284	AAC1	Mitochondrial inner membrane ADP/ATP translocator; exchanges cytosolic ADP for mitochondrially synthesized ATP; phosphorylated; Aac1p is a minor isoform while Pet9p is the major ADP/ATP translocator; relocalizes from mitochondrion to cytoplasm upon DNA replication stress [Source:SGD;Acc:S000004660]
YJL078C	4210.62	0.273656	0.152722	1.80837	0.0705485	0.133463	PRY3	Cell wall-associated protein involved in export of acetylated sterols; member of the CAP protein superfamily (cysteine-rich secretory proteins (CRISP), antigen 5, and pathogenesis related 1 proteins); role in mating efficiency; expression of full-length transcript is daughter cell-specific; in response to alpha factor, a short transcript starting at +452 is expressed and the long form is represse…
YDR432W	4047.21	-0.117569	0.152708	-0.773901	0.438989	0.56805	NPL3	RNA-binding protein; promotes elongation, regulates termination, and carries poly(A) mRNA from nucleus to cytoplasm; represses translation initiation by binding eIF4G; required for pre-mRNA splicing; interacts with E3 ubiquitin ligase Bre1p, linking histone ubiquitination to mRNA processing; may have role in telomere maintenance; dissociation from mRNAs promoted by Mtr10p; phosphorylated by Sky1p…
YMR284W	246.902	-0.0644415	0.15265	-0.422577	0.672604	0.774066	YKU70	Subunit of the telomeric Ku complex (Yku70p-Yku80p); involved in telomere length maintenance, structure and telomere position effect; required for localization of telomerase ribonucleoprotein to nucleus via interaction with the TLC1 guide RNA; relocates to sites of double-strand cleavage to promote nonhomologous end joining during DSB repair [Source:SGD;Acc:S000004897]
YNL185C	210.359	-0.466167	0.152635	-3.09441	0.00197205	0.00637498	MRPL19	Mitochondrial ribosomal protein of the large subunit [Source:SGD;Acc:S000005129]
YKR049C	172.582	0.291153	0.152618	1.88368	0.0596081	0.115973	FMP46	Putative redox protein containing a thioredoxin fold; the authentic, non-tagged protein is detected in highly purified mitochondria in high-throughput studies [Source:SGD;Acc:S000001757]
YDR220C	5.2835	0.0117341	0.152539	0.142882	0.886384	0.92642	YDR220C	Dubious open reading frame; unlikely to encode a functional protein, based on available experimental and comparative sequence data; null mutant exhibits synthetic phenotype with alpha-synuclein [Source:SGD;Acc:S000002628]
YER098W	146.779	0.00542995	0.152539	0.0580772	0.953687	0.97063	UBP9	Ubiquitin-specific protease that cleaves ubiquitin-protein fusions; UBP9 has a paralog, UBP13, that arose from the whole genome duplication [Source:SGD;Acc:S000000900]
YML128C	500.474	0.68411	0.152497	4.38828	1.1425e-05	6.56705e-05	MSC1	Protein of unknown function; mutant is defective in directing meiotic recombination events to homologous chromatids; the authentic, non-tagged protein is detected in highly purified mitochondria and is phosphorylated [Source:SGD;Acc:S000004597]
YLR453C	124.767	0.331613	0.152448	2.18304	0.0290331	0.0633614	RIF2	Protein that binds to the Rap1p C-terminus; acts synergistically with Rif1p to help control telomere length and establish telomeric silencing; deletion results in telomere elongation; RIF2 has a paralog, ORC4, that arose from the whole genome duplication [Source:SGD;Acc:S000004445]
YNL144C	166.528	-0.449763	0.152412	-3.0068	0.00264013	0.00811773	YNL144C	Putative protein of unknown function; non-tagged protein is detected in highly purified mitochondria in high-throughput studies; contains a PH domain and binds phosphatidylinositols and phosphatidylethanolamine in a large-scale study; YNL144C has a paralog, YHR131C, that arose from the whole genome duplication [Source:SGD;Acc:S000005088]
YGR230W	137.11	1.10774	0.152395	7.13866	9.42471e-13	1.76021e-11	BNS1	Protein of unknown function; overexpression bypasses need for Spo12p, but not required for meiosis; BNS1 has a paralog, SPO12, that arose from the whole genome duplication [Source:SGD;Acc:S000003462]
YMR010W	1248.71	0.151805	0.152342	0.988226	0.323042	0.451929	ANY1	Putative protein of unknown function; null allele suppresses the lethality of neo1 and dop1 null alleles, as well as the growth defect of a mon2 null allele, and the cold sensitivity of a drs2 null; proposed function as a phospholipid scramblase that reduces membrane asymmetry; PQ loop family member; localizes to the cytoplasm and endoplasmic reticulum in HTP studies; non-essential gene [Source:S…
YPR078C	3.48076	0.0933912	0.152325	0.519936	0.603108	0.715005	YPR078C	Putative protein of unknown function; possible role in DNA metabolism and/or in genome stability; expression is heat-inducible [Source:SGD;Acc:S000006282]
YPR167C	161.381	0.301336	0.152284	1.97345	0.0484448	0.0977594	MET16	3'-phosphoadenylsulfate reductase; reduces 3'-phosphoadenylyl sulfate to adenosine-3',5'-bisphosphate and free sulfite using reduced thioredoxin as cosubstrate, involved in sulfate assimilation and methionine metabolism [Source:SGD;Acc:S000006371]
YFL055W	119.563	-0.136361	0.152191	-0.894485	0.371062	0.501123	AGP3	Low-affinity amino acid permease; may act to supply the cell with amino acids as nitrogen source in nitrogen-poor conditions; transcription is induced under conditions of sulfur limitation; plays a role in regulating Ty1 transposition [Source:SGD;Acc:S000001839]
YAL055W	77.2007	0.443742	0.152178	2.87655	0.00402048	0.0116612	PEX22	Putative peroxisomal membrane protein; required for import of peroxisomal proteins; functionally complements a Pichia pastoris pex22 mutation [Source:SGD;Acc:S000000051]
YMR259C	1615.44	-0.0253241	0.152013	-0.166979	0.867387	0.915074	TRM732	Protein involved in 2'-O-methylation of C32 of substrate tRNAs; interacts with 2'-O-ribose methyltransferase Trm7p; green fluorescent protein (GFP)-fusion protein localizes to the cytoplasm; non-essential gene; yeast null mutant can be functionally complemented by human THADA, mutations in which have been implicated in epithelial thyroid adenomas, type 2 diabetes, and polycystic ovary syndrome (P…
YML009C	447.479	-0.203853	0.152007	-1.37016	0.170636	0.274325	MRPL39	Mitochondrial ribosomal protein of the large subunit [Source:SGD;Acc:S000004468]
YOL015W	145.91	-0.488705	0.15198	-3.2551	0.00113354	0.00392005	IRC10	Protein of unknown function; subunit of the leading edge protein (LEP) complex (Ssp1-Ady3-Don1-Irc10) that forms a ring-like structure at the leading edge of the prospore membrane during meiosis II; null mutant displays increased levels of spontaneous Rad52p foci [Source:SGD;Acc:S000005375]
YNL180C	716.683	0.438668	0.151966	2.87583	0.00402972	0.0116827	RHO5	Non-essential small GTPase of the Rho/Rac family of Ras-like proteins; RAC1 ortholog; regulated by phosphorylation and ubiquitination; likely involved in protein kinase C (Pkc1p)-dependent signal transduction pathway that controls cell integrity [Source:SGD;Acc:S000005124]
YDR210W-B	108.636	-0.0368194	0.151962	-0.240424	0.810002	0.877781	YDR210W-B	Retrotransposon TYA Gag and TYB Pol genes; transcribed/translated as one unit; polyprotein is processed to make a nucleocapsid-like protein (Gag), reverse transcriptase (RT), protease (PR), and integrase (IN); similar to retroviral genes [Source:SGD;Acc:S000007393]
YOL159C-A	121.126	0.229908	0.151901	1.5044	0.132478	0.223664	YOL159C-A	Protein of unknown function; overexpression affects endocytic protein trafficking; identified by sequence comparison with hemiascomycetous yeast species [Source:SGD;Acc:S000007627]
YDR536W	4.03159	0.205031	0.151887	1.08574	0.277593	0.399531	STL1	Glycerol proton symporter of the plasma membrane; subject to glucose-induced inactivation, strongly but transiently induced when cells are subjected to osmotic shock [Source:SGD;Acc:S000002944]
YHR116W	237.123	-0.484825	0.151869	-3.22057	0.00127934	0.00435959	COX23	Protein that functions in mitochondrial copper homeostasis; mitochondrial intermembrane space protein; essential for functional cytochrome oxidase expression; homologous to Cox17p; contains twin cysteine-x9-cysteine motifs [Source:SGD;Acc:S000001158]
YNL133C	95.4972	1.22629	0.151861	7.89805	2.83295e-15	7.52344e-14	FYV6	Protein of unknown function; required for survival upon exposure to K1 killer toxin; proposed to regulate double-strand break repair via non-homologous end-joining [Source:SGD;Acc:S000005077]
HRA1	4.38032	-0.0473269	0.151827	-0.327869	0.743011	0.830346	HRA1	Non-protein-coding RNA; substrate of RNase P, possibly involved in rRNA processing, specifically maturation of 20S precursor into the mature 18S rRNA [Source:SGD;Acc:S000119380]
YNL210W	3.41193	0.119595	0.151781	0.877575	0.380174	0.510087	MER1	mRNA-binding protein required for meiosis-specific mRNA splicing; required for chromosome pairing and meiotic recombination; Mer1p regulon embraces four essential meiotic pre-mRNAs: REC107, HFM1, AMA1 and SPO22 [Source:SGD;Acc:S000005154]
YLR035C-A	6.02842	0.0128405	0.151769	0.321283	0.747996	0.834288	YLR035C-A	Retrotransposon TYA Gag and TYB Pol genes; polyprotein is processed to make a nucleocapsid-like protein (Gag), reverse transcriptase (RT), protease (PR), and integrase (IN); YLR035C-A is part of a mutant retrotransposon [Source:SGD;Acc:S000007225]
YLR099C	513.3	-0.577263	0.151744	-3.82503	0.000130756	0.000573902	ICT1	Lysophosphatidic acid acyltransferase; responsible for enhanced phospholipid synthesis during organic solvent stress; null displays increased sensitivity to Calcofluor white; highly expressed during organic solvent stress; ICT1 has a paralog, ECM18, that arose from the whole genome duplication; human ABHD5 can complement ict1 null mutant [Source:SGD;Acc:S000004089]
YIL046W-A	4.32972	0.0289669	0.151667	0.113268	0.909818	0.942617	YIL046W-A	Putative protein of unknown function; identified by expression profiling and mass spectrometry [Source:SGD;Acc:S000028836]
YIL006W	214.514	-0.431503	0.151624	-2.84431	0.0044508	0.0127218	YIA6	Mitochondrial NAD+ transporter; involved in the transport of NAD+ into the mitochondria (see also YEA6); member of the mitochondrial carrier subfamily; disputed role as a pyruvate transporter; has putative mouse and human orthologs; YIA6 has a paralog, YEA6, that arose from the whole genome duplication [Source:SGD;Acc:S000001268]
YDL037C	2604.19	-1.16918	0.151614	-7.78416	7.01789e-15	1.77392e-13	BSC1	Protein of unconfirmed function; similar to cell surface flocculin Flo11p; ORF exhibits genomic organization compatible with a translational readthrough-dependent mode of expression; in W303 strain one continuous open reading frame comprising of YDL037C, the intergenic region and YDL039C encodes the gene IMI1 [Source:SGD;Acc:S000002195]
YPL027W	4.3258	0.119466	0.151565	0.739324	0.45971	0.588452	SMA1	Protein of unknown function involved in prospore membrane assembly; involved in the assembly of the prospore membrane during sporulation; interacts with Spo14p [Source:SGD;Acc:S000005948]
YIL055C	140.974	0.00837131	0.151563	0.0694558	0.944627	0.965008	YIL055C	Putative protein of unknown function [Source:SGD;Acc:S000001317]
YDR255C	148.797	-0.207727	0.151517	-1.39525	0.16294	0.265548	RMD5	Component of GID Complex that confers ubiquitin ligase (U3) activity; necessary for polyubiquitination and degradation of the gluconeogenic enzyme fructose-1,6-bisphosphatase; forms dimer with Fyv10p that is then recruited to GID Complex by Gid8p; also required for sporulation; conserved protein that has a degenerate RING finger domain [Source:SGD;Acc:S000002663]
YOL105C	601.597	0.310415	0.151507	2.05474	0.0399039	0.0828621	WSC3	Sensor-transducer of the stress-activated PKC1-MPK1 signaling pathway; involved in maintenance of cell wall integrity; involved in response to heat shock and other stressors; regulates 1,3-beta-glucan synthesis; WSC3 has a paralog, WSC2, that arose from the whole genome duplication [Source:SGD;Acc:S000005465]
YHL016C	147.575	0.191289	0.151444	1.26922	0.204364	0.31658	DUR3	Plasma membrane transporter for both urea and polyamines; expression is highly sensitive to nitrogen catabolite repression and induced by allophanate, the last intermediate of the allantoin degradative pathway [Source:SGD;Acc:S000001008]
YLR166C	722.682	0.0883405	0.151421	0.584747	0.558718	0.677436	SEC10	Essential 100kDa subunit of the exocyst complex; the exocyst mediates polarized targeting and tethering of post-Golgi secretory vesicles to active sites of exocytosis at the plasma membrane prior to SNARE-mediated fusion [Source:SGD;Acc:S000004156]
YKL090W	275.68	0.176577	0.151406	1.15803	0.246852	0.365215	CUE2	Protein of unknown function; has two CUE domains that bind ubiquitin, which may facilitate intramolecular monoubiquitination [Source:SGD;Acc:S000001573]
YKR102W	257.276	-0.521023	0.151354	-3.46813	0.0005241	0.00198	FLO10	Member of the FLO family of cell wall flocculation proteins; not expressed in most lab strains; overproduction induces flocculation that can be inhibited by mannose, sucrose, or glucose; overproduction also promotes haploid invasive growth and diploid filamentous growth [Source:SGD;Acc:S000001810]
YOR137C	593.54	-0.013009	0.151279	-0.132664	0.89446	0.931578	SIA1	Protein of unassigned function; involved in activation of the Pma1p plasma membrane H+-ATPase by glucose; contains peptide signal for membrane localization [Source:SGD;Acc:S000005663]
YJL189W	3978.85	0.301731	0.151222	1.99291	0.0462711	0.0938544	RPL39	Ribosomal 60S subunit protein L39; required for ribosome biogenesis; loss of both Rpl31p and Rpl39p confers lethality; also exhibits genetic interactions with SIS1 and PAB1; homologous to mammalian ribosomal protein L39, no bacterial homolog [Source:SGD;Acc:S000003725]
YHR097C	537.035	-0.653433	0.151218	-4.42015	9.8633e-06	5.75878e-05	YHR097C	Putative protein of unknown function; green fluorescent protein (GFP)-fusion protein localizes to the cytoplasm and the nucleus; YHR097C has a paralog, PAL1, that arose from the whole genome duplication [Source:SGD;Acc:S000001139]
YDR427W	1946.59	0.702457	0.151191	4.61673	3.8984e-06	2.49355e-05	RPN9	Non-ATPase regulatory subunit of the 26S proteasome; similar to putative proteasomal subunits in other species; null mutant is temperature sensitive and exhibits cell cycle and proteasome assembly defects; protein abundance increases in response to DNA replication stress; relocalizes to the cytosol in response to hypoxia [Source:SGD;Acc:S000002835]
YLR227C	173.512	0.547205	0.151141	3.5967	0.000322283	0.00128464	ADY4	Structural component of the meiotic outer plaque; outer plaque is a membrane-organizing center that assembles on the cytoplasmic face of the spindle pole body during meiosis II and triggers the formation of the prospore membrane [Source:SGD;Acc:S000004217]
YDL057W	136.307	0.110158	0.151127	0.735002	0.462338	0.590734	YDL057W	Putative protein of unknown function; YDL057W is not an essential gene [Source:SGD;Acc:S000002215]
YBR138C	176.635	-0.011948	0.151106	-0.0867723	0.930852	0.956068	YBR138C	Cytoplasmic protein of unknown function; APCC(Cdh1) substrate; potentially phosphorylated by Cdc28p; YBR138C is not an essential gene [Source:SGD;Acc:S000000342]
YJR120W	23.7543	-0.0194005	0.15106	-0.0781672	0.937695	0.960275	YJR120W	Protein of unknown function; essential for growth under anaerobic conditions; mutation causes decreased expression of ATP2, impaired respiration, defective sterol uptake, and altered levels/localization of ABC transporters Aus1p and Pdr11p [Source:SGD;Acc:S000003881]
YIL168W	121.93	0.217584	0.151059	1.43108	0.152408	0.251312	NA	NA
YCL012C	238.685	0.262966	0.151024	1.73644	0.0824855	0.151227	YCL012C	Protein of unknown function; SWAT-GFP and mCherry fusion proteins localize to the endoplasmic reticulum and vacuole respectively; orthologs are present in S. bayanus, S. paradoxus and Ashbya gossypii; YCL012C is not an essential gene [Source:SGD;Acc:S000029705]
YGL238W	2713.92	-0.163056	0.151006	-1.07675	0.28159	0.40372	CSE1	Nuclear envelope protein that acts as a recycling factor; mediates the nuclear export of Srp1p (importin alpha) back to the cytoplasm after its import substrates have been released into the nucleoplasm, thereby allowing the participation of Srp1p in multiple rounds of nuclear import; required for accurate chromosome segregation; homolog of metazoan CAS and human CSE1L, overexpression of which is …
YIL040W	779.023	0.479462	0.150934	3.14347	0.00166955	0.00552188	APQ12	Nuclear envelope/ER integral membrane protein; interacts and functions with Brr6p and Brl1p in lipid homeostasis; mutants are defective in nuclear pore complex biogenesis, nuclear envelope morphology, mRNA export from the nucleus and are sensitive to sterol biosynthesis inhibitors and membrane fluidizing agents; exhibits synthetic lethal genetic interactions with genes involved in lipid metabolis…
YBR197C	499.596	0.066183	0.15085	0.439048	0.660627	0.763634	YBR197C	Protein of unknown function; green fluorescent protein (GFP)-fusion protein localizes to the cytoplasm and nucleus; YBR197C is not an essential gene; relative distribution to the nucleus increases upon DNA replication stress; YBR197C has a paralog, YPL077C, that arose from the whole genome duplication [Source:SGD;Acc:S000000401]
YCR046C	542.479	-0.476933	0.150833	-3.20329	0.00135866	0.00460001	IMG1	Mitochondrial ribosomal protein of the large subunit; required for respiration and for maintenance of the mitochondrial genome [Source:SGD;Acc:S000000642]
YGR161C-D	110.65	-0.233839	0.150825	-1.5483	0.12155	0.209084	YGR161C-D	Retrotransposon TYA Gag and TYB Pol genes; transcribed/translated as one unit; polyprotein is processed to make a nucleocapsid-like protein (Gag), reverse transcriptase (RT), protease (PR), and integrase (IN); similar to retroviral genes [Source:SGD;Acc:S000007368]
YJR008W	215.341	0.354855	0.150808	2.32376	0.0201383	0.04631	MHO1	Protein of unknown function; inhibits haploid invasive growth when overexpressed; synthetically lethal with phospholipase C (PLC1); expression induced by mild heat-stress on a non-fermentable carbon source, upon entry into stationary phase and upon nitrogen deprivation; repressed by inosine and choline in an Opi1p-dependent manner; highly conserved from bacteria to human; Memo, the human homolog,…
YJL201W	496.704	-0.226333	0.150798	-1.50745	0.131696	0.222632	ECM25	Non-essential protein of unknown function; promoter contains a consensus binding sequence for factor Abf1p [Source:SGD;Acc:S000003737]
YMR030W	109.984	0.0649637	0.150774	0.408555	0.682866	0.782158	RSF1	Protein required for respiratory growth; localized to both the nucleus and mitochondrion; may interact with transcription factors to mediate the transition to respiratory growth and activate transcription of nuclear and mitochondrial genes [Source:SGD;Acc:S000004632]
YBL031W	151.566	-0.223517	0.150681	-1.48711	0.136986	0.229633	SHE1	Mitotic spindle protein; interacts with components of the Dam1 (DASH) complex, its effector Sli15p, and microtubule-associated protein Bim1p; also localizes to nuclear microtubules and to the bud neck in a ring-shaped structure; inhibits dynein function [Source:SGD;Acc:S000000127]
YML043C	422.305	-0.218712	0.150668	-1.52148	0.128139	0.21821	RRN11	Component of the core factor (CF) rDNA transcription factor complex; CF is required for transcription of 35S rRNA genes by RNA polymerase I and is composed of Rrn6p, Rrn7p, and Rrn11p [Source:SGD;Acc:S000004507]
YMR048W	182.962	0.141855	0.1506	0.922	0.356528	0.48666	CSM3	Replication fork associated factor; required for stable replication fork pausing; component of the DNA replication checkpoint pathway; required for accurate chromosome segregation during meiosis; forms nuclear foci upon DNA replication stress [Source:SGD;Acc:S000004651]
YDR230W	4.69469	-0.19844	0.150558	-1.46906	0.141815	0.236384	YDR230W	Dubious open reading frame; unlikely to encode a functional protein, based on available experimental and comparative sequence data; partially overlaps the verified gene COX20/YDR231C [Source:SGD;Acc:S000002638]
YGR188C	158.02	-0.286664	0.150419	-1.9285	0.0537927	0.106771	BUB1	Protein kinase involved in the cell cycle checkpoint into anaphase; in complex with Mad1p and Bub3p, prevents progression into anaphase in presence of spindle damage; Cdc28p-mediated phosphorylation at Bub1p-T566 is important for degradation in anaphase and adaptation of checkpoint to prolonged mitotic arrest; associates with centromere DNA via Skp1p; involved in Sgo1p relocalization in response …
YMR299C	299.57	0.492885	0.150411	3.26268	0.00110366	0.00383357	DYN3	Dynein light intermediate chain (LIC); localizes with dynein, null mutant is defective in nuclear migration [Source:SGD;Acc:S000004914]
YGR110W	154.63	0.397372	0.150405	2.63747	0.00835278	0.0219234	CLD1	Mitochondrial cardiolipin-specific phospholipase; functions upstream of Taz1p to generate monolyso-cardiolipin; transcription increases upon genotoxic stress; involved in restricting Ty1 transposition; has homology to mammalian CGI-58 [Source:SGD;Acc:S000003342]
YLR345W	307.75	0.414803	0.150281	2.80807	0.004984	0.0140669	YLR345W	Similar to 6-phosphofructo-2-kinase enzymes; mRNA expression is repressed by the Rfx1p-Tup1p-Ssn6p repressor complex; YLR345W is not an essential gene [Source:SGD;Acc:S000004337]
YMR175W-A	3.31271	-0.139827	0.150275	-1.40724	0.159357	0.260726	YMR175W-A	Putative protein of unknown function [Source:SGD;Acc:S000028848]
YNL174W	4.38045	-0.0799863	0.150251	-0.507816	0.611582	0.721518	YNL174W	Dubious open reading frame; unlikely to encode a functional protein, based on available experimental and comparative sequence data; overlaps the verified gene NOP13/YNL175C [Source:SGD;Acc:S000005118]
YDR270W	517.416	-0.729977	0.150234	-4.93086	8.18702e-07	5.95712e-06	CCC2	Cu(+2)-transporting P-type ATPase; required for export of copper from the cytosol into an extracytosolic compartment; similar to human proteins involved in Menkes and Wilsons diseases; protein abundance increases in response to DNA replication stress; affects TBSV model (+)RNA virus replication by regulating copper metabolism; human homologs ATP7A and ATP7B both complement yeast null mutant [Sour…
YPL148C	169.496	0.807119	0.150193	5.29575	1.18531e-07	1.00186e-06	PPT2	Phosphopantetheine:protein transferase (PPTase); activates mitochondrial acyl carrier protein (Acp1p) by phosphopantetheinylation [Source:SGD;Acc:S000006069]
YPL216W	260.315	-0.0833526	0.150188	-0.558846	0.576267	0.692035	YPL216W	Putative protein of unknown function; not an essential gene; YPL216W has a paralog, ITC1, that arose from the whole genome duplication [Source:SGD;Acc:S000006137]
YDR132C	317.864	0.0636815	0.150184	0.406999	0.684009	0.783039	YDR132C	Protein of unknown function; protein increases in abundance and relative distribution to the nucleus increases upon DNA replication stress; YDR132C has a paralog, YLR108C, that arose from the whole genome duplication [Source:SGD;Acc:S000002539]
YIR030W-A	3.64152	0.386363	0.150147	2.26742	0.0233643	0.0525009	YIR030W-A	Dubious open reading frame; unlikely to encode a functional protein, based on available experimental and comparative sequence data; overlaps ORF DAL7/YIR031C [Source:SGD;Acc:S000028802]
YNL277W-A	4.96506	0.0331176	0.150142	0.280844	0.77883	0.85385	YNL277W-A	Putative protein of unknown function [Source:SGD;Acc:S000028852]
YDR034C-D	240.825	-0.238347	0.15014	-1.6205	0.105125	0.184872	YDR034C-D	Retrotransposon TYA Gag and TYB Pol genes; transcribed/translated as one unit; polyprotein is processed to make a nucleocapsid-like protein (Gag), reverse transcriptase (RT), protease (PR), and integrase (IN); similar to retroviral genes [Source:SGD;Acc:S000007345]
YDR089W	326.674	0.370733	0.15013	2.46712	0.0136206	0.0332666	VTC5	Novel subunit of the vacuolar transporter chaperone complex; vacuolar transmembrane protein that regulates biosynthesis of polyphosphate; deletion reduces and overexpression increases polyP accumulation; SPX domain (Syg1, Pho81, Xpr1)-containing protein involved in phosphate homeostasis; relocalizes from vacuole to cytoplasm upon DNA replication stress [Source:SGD;Acc:S000002496]
YER069W	5396.46	-0.578488	0.15012	-3.84554	0.000120289	0.00053543	ARG5,6	Acetylglutamate kinase and N-acetyl-gamma-glutamyl-phosphate reductase; N-acetyl-L-glutamate kinase (NAGK) catalyzes the 2nd and N-acetyl-gamma-glutamyl-phosphate reductase (NAGSA), the 3rd step in arginine biosynthesis; synthesized as a precursor which is processed in the mitochondrion to yield mature NAGK and NAGSA; enzymes form a metabolon complex with Arg2p; NAGK C-terminal domain stabilizes …
YJL102W	282.313	-0.239381	0.150104	-1.63358	0.102348	0.180796	MEF2	Mitochondrial elongation factor involved in translational elongation [Source:SGD;Acc:S000003638]
YJR054W	564.548	0.14343	0.150076	0.949061	0.342589	0.472139	KCH1	Potassium transporter that mediates K+ influx; activates high-affinity Ca2+ influx system (HACS) during mating pheromone response; expression up-regulated in response to alpha factor; localized to sites of polarized growth; member of a fungal-specific gene family; potential Cdc28p substrate; KCH1 has a paralog, PRM6, that arose from the whole genome duplication [Source:SGD;Acc:S000003815]
YDL085C-A	264.484	0.187787	0.150047	1.25247	0.2104	0.323383	YDL085C-A	Putative protein of unknown function; green fluorescent protein (GFP)-fusion protein localizes to the cytoplasm and nucleus [Source:SGD;Acc:S000007588]
YDR053W	3.3291	-0.0279635	0.150041	-0.179586	0.857478	0.90819	YDR053W	Putative protein of unknown function; open reading frame overlaps 5' end of essential DBF4 gene encoding the regulatory subunit of the Cdc7p-Dbf4p kinase complex [Source:SGD;Acc:S000002460]
YJR038C	3.30127	-0.234484	0.150036	-1.65889	0.0971385	0.173493	YJR038C	Dubious open reading frame; unlikely to encode a functional protein, based on available experimental and comparative sequence data [Source:SGD;Acc:S000003799]
snR189	5.38319	-0.0636373	0.149993	-0.243214	0.807839	0.876192	snR189	H/ACA box small nucleolar RNA (snoRNA); guides pseudouridylation of large subunit (LSU) rRNA at position U2735 and small subunit (SSU) rRNA at position U466 [Source:SGD;Acc:S000007314]
YGL063W	433.556	-0.593345	0.149958	-3.98395	6.77782e-05	0.000322934	PUS2	Mitochondrial tRNA:pseudouridine synthase; acts at positions 27 and 28, but not at position 72; efficiently and rapidly targeted to mitochondria, specifically dedicated to mitochondrial tRNA modification; mutation also affects pseudouridylation of some nuclear-encoded mRNAs; PUS2 has a paralog, PUS1, that arose from the whole genome duplication [Source:SGD;Acc:S000003031]
YGL174W	215.603	0.711866	0.149954	4.71393	2.42981e-06	1.62176e-05	BUD13	Subunit of the RES complex; RES complex is required for nuclear pre-mRNA retention and splicing; involved in bud-site selection; diploid mutants display a unipolar budding pattern instead of the wild-type bipolar pattern due to a specific defect in MATa1 pre-mRNA splicing which leads to haploid gene expression in diploids [Source:SGD;Acc:S000003142]
YNR058W	132.252	0.524949	0.149949	3.47828	0.000504633	0.00191566	BIO3	7,8-diamino-pelargonic acid aminotransferase (DAPA); catalyzes the second step in the biotin biosynthesis pathway; BIO3 is in a cluster of 3 genes (BIO3, BIO4, and BIO5) that mediate biotin synthesis; BIO3 and BIO4 were acquired by horizontal gene transfer (HGT) from bacteria [Source:SGD;Acc:S000005341]
YML104C	661.299	-0.214486	0.149918	-1.42589	0.1539	0.253264	MDM1	PtdIns-3-P binding protein that tethers the ER to vacuoles at NVJs; anchored in the ER membrane at nucleus-vacuole junctions and binds phosphatidylinositol 3-phosphate (PtdIns-3-P) in the vacuolar membrane via its Phox homology (PX) domain; expressed predominantly in late G1 to early S phase of the cell cycle; mutation affects nuclear and mitochondrial transmission to daughter buds; similar to 4 …
YGL034C	3.19877	-0.109295	0.149882	-0.954265	0.33995	0.469632	YGL034C	Putative protein of unknown function; conserved among S. cerevisiae strains; YGL034C is not an essential gene [Source:SGD;Acc:S000003002]
YCL049C	642.151	0.403729	0.149799	2.68381	0.00727874	0.0194367	YCL049C	Protein of unknown function; localizes to membrane fraction; YCL049C is not an essential gene [Source:SGD;Acc:S000000554]
YGL258W-A	4.76163	0.348755	0.149796	2.42842	0.0151649	0.0365702	YGL258W-A	Putative protein of unknown function [Source:SGD;Acc:S000007607]
YDR156W	745.971	-0.0398479	0.149784	-0.263865	0.791884	0.863349	RPA14	RNA polymerase I subunit A14 [Source:SGD;Acc:S000002563]
[truncated: 5,478 more rows]

## Sheet: btt1_WT
ID	baseMean	log2FoldChange	lfcSE	stat	pvalue	padj	external_gene_name	description
[truncated: 6,822 more rows]

## Sheet: btt1egd1_WT
ID	baseMean	log2FoldChange	lfcSE	stat	pvalue	padj	external_gene_name	description
[truncated: 6,822 more rows]

[truncated: 4 more sheets: caf130_WT, cal4_WT, egd1_WT, egd2_WT]
