# Supplementary material for: Dedicated chaperones coordinate co-translational regulation of ribosomal protein production with ribosome assembly to preserve proteostasis
Source: eLife. 2022 Mar 31;11:e74255. doi: 10.7554/eLife.74255 (PMC8970588; doi:10.7554/eLife.74255)
Supplement: Supplementary file 8. [file elife-74255-supp8.xlsx]

## Sheet: proteinGroups
Protein IDs	Protein names	Gene names	Fasta headers	Number of proteins	Peptides	Sequence coverage [%]	Mol. weight [kDa]	Sequence length	Q-value	Score	Intensity	Intensity 01	Intensity 02	Intensity 03	Intensity 04	Intensity 05	Intensity 06	Intensity 07	Intensity 08	Intensity 09	Intensity 10	Intensity 11	Intensity 12	Intensity 13	Intensity 14	Intensity 15	Intensity 16	Intensity 17	Intensity 18	Intensity 19	Intensity 20	Intensity 21	Intensity 22	Intensity 23	Intensity 24	Intensity 25	Intensity 26	Intensity 27	Intensity 28	Intensity 29	Intensity 30	Intensity 31	Intensity 32	Intensity 33	Intensity 34	Intensity 35	Intensity 36	Intensity 37	Intensity 38
P0CX46;P0CX45	60S ribosomal protein L2-B;60S ribosomal protein L2-A	RPL2B;RPL2A	sp|P0CX46|RL2B_YEAST 60S ribosomal protein L2-B OS=Saccharomyces cerevisiae (strain ATCC 204508 / S288c) GN=RPL2B PE=1 SV=1;sp|P0CX45|RL2A_YEAST 60S ribosomal protein L2-A OS=Saccharomyces cerevisiae (strain ATCC 204508 / S288c) GN=RPL2A PE=1 SV=1	2	16	59.4	27.408	254	0	323.31	37384000000	91717000	8314300	1672200	1194300	1919900	51635000	72922000	21739000	92292000	6889900000	15151000	3557600	9998200	25932000	8189900	1544000	0	3346900	1757700	1312200	21172000	186710	16467000	4857900	3978600	48158000	106560000	72787000	188040000	408480000	6787800000	18530000000	1043300000	858630000	1178300000	113950000	145500000	229560000
Q12277	Exosome complex component RRP42	RRP42	sp|Q12277|RRP42_YEAST Exosome complex component RRP42 OS=Saccharomyces cerevisiae (strain ATCC 204508 / S288c) GN=RRP42 PE=1 SV=1	1	2	10.6	29.055	265	0	16.58	105680000000	0	0	3980800000	5612100000	4022900000	5864400000	5791800000	5337100000	4997300000	6631900000	6917200000	5658100000	4737900000	2585800000	4862800000	5301600000	4870300000	4127400000	2819000000	3831600000	6102400000	0	45941000	5691000000	0	39763000	0	47671000	0	0	3633500	162620000	43403000	5589400000	0	0	0	0
P23248	40S ribosomal protein S1-B	RPS1B	sp|P23248|RS3A2_YEAST 40S ribosomal protein S1-B OS=Saccharomyces cerevisiae (strain ATCC 204508 / S288c) GN=RPS1B PE=1 SV=3	1	18	57.6	28.812	255	0	323.31	40522000000	610080	809830	0	0	0	10836000	12504000	8518200	33554000	3039700000	13715000	17795000	1277300	0	9686900	1229200	6870300	0	7036300	119600	18537000	3346300	4889700	4316800	15683000	16317000	54183000	50113000	108180000	194940000	13176000000	16686000000	2032700000	1409600000	1069700000	730350000	891600000	408970000
P02994	Elongation factor 1-alpha	TEF1	sp|P02994|EF1A_YEAST Elongation factor 1-alpha OS=Saccharomyces cerevisiae (strain ATCC 204508 / S288c) GN=TEF1 PE=1 SV=1	1	26	53.7	50.032	458	0	323.31	459480000000	1770000000	3584500000	2313700000	846300000	1496000000	215980000000	3726800000	4720000000	9390200000	2801900000	1540100000	811530000	1344800000	1365200000	1627100000	1843100000	1648600000	787300000	1653600000	1248000000	3067400000	3471900000	4674900000	3039700000	9595100000	14521000000	8994200000	6911800000	19407000000	40509000000	14088000000	15765000000	7798600000	5464300000	6105800000	5429700000	13698000000	7693700000
Q07953	Ribosome maturation protein SDO1	SDO1	sp|Q07953|SDO1_YEAST Ribosome maturation protein SDO1 OS=Saccharomyces cerevisiae (strain ATCC 204508 / S288c) GN=SDO1 PE=1 SV=1	1	5	18.4	28.283	250	0	8.7088	45491000000	2061500000	656610000	1587200000	1738200000	177790000	804860000	0	358770000	1176900000	1823800000	1718700000	1037400000	367960000	43656000	141710000	691570000	616520000	504100000	0	106900000	1893000000	516720000	2381900000	1452300000	2462600000	2224000000	1814600000	2700000000	1078600000	2041100000	248700000	111490000	2560100000	363320000	202620000	351550000	1628600000	2527600000
P41903	Peroxisomal acyl-coenzyme A thioester hydrolase 1	TES1	sp|P41903|PTE1_YEAST Peroxisomal acyl-coenzyme A thioester hydrolase 1 OS=Saccharomyces cerevisiae (strain ATCC 204508 / S288c) GN=TES1 PE=1 SV=1	1	3	9.7	40.259	349	0	7.0778	69298000000	1889600000	3810400000	1626500000	1218800000	1795300000	749330000	1282300000	1521200000	1846300000	1439700000	1774200000	1495000000	1777200000	1447300000	1694300000	1713600000	3463100000	1072300000	1200000000	1577800000	2076100000	1755800000	1781500000	1079200000	1559300000	4015700000	1458300000	1302800000	1705900000	2048100000	2108500000	1457300000	2060800000	2174600000	2120800000	1783700000	1266300000	3136900000
P00330;P38113	Alcohol dehydrogenase 1	ADH1	sp|P00330|ADH1_YEAST Alcohol dehydrogenase 1 OS=Saccharomyces cerevisiae (strain ATCC 204508 / S288c) GN=ADH1 PE=1 SV=5	2	16	49.1	36.849	348	0	323.31	51997000000	857500	396370000	283460000	742140000	485850000	619920000	1240300000	530290000	711410000	1134900000	777280000	918280000	707900000	1316100000	790680000	310350000	1061600000	641010000	565350000	32836000	562950000	595240000	647750000	1310400000	524460000	720240000	10111000000	12491000000	2405000000	884990000	850000000	624610000	816420000	732840000	934660000	1176000000	897840000	1054000000
P29453	60S ribosomal protein L8-B	RPL8B	sp|P29453|RL8B_YEAST 60S ribosomal protein L8-B OS=Saccharomyces cerevisiae (strain ATCC 204508 / S288c) GN=RPL8B PE=1 SV=3	1	24	65.2	28.111	256	0	323.31	27100000000	111840000	11326000	7057600	7043800	5141100	7812600	3796100	3175200	17761000	960270000	18554000	3665200	3229600	0	1598400	4094400	870920	2434000	2739200	6064800	20108000	6827200	103600000	12264000	8677300	1436900000	595080000	390920000	855540000	1114600000	13699000000	4941100000	756080000	723420000	661360000	214350000	76267000	72442000
P0CX38;P0CX37	40S ribosomal protein S6-B;40S ribosomal protein S6-A	RPS6B;RPS6A	sp|P0CX38|RS6B_YEAST 40S ribosomal protein S6-B OS=Saccharomyces cerevisiae (strain ATCC 204508 / S288c) GN=RPS6B PE=1 SV=1;sp|P0CX37|RS6A_YEAST 40S ribosomal protein S6-A OS=Saccharomyces cerevisiae (strain ATCC 204508 / S288c) GN=RPS6A PE=1 SV=1	2	10	44.9	26.996	236	0	323.31	17263000000	0	3800400	778520	0	18811000	8311200	11852000	7277400	12849000	824730000	9600100	5107400	13364000	4978600	3503700	1909000	0	0	1732700	8401800	8114000	2631900	14800000	0	7205000	11984000	128230000	120690000	240640000	387170000	2407400000	10555000000	291190000	219700000	191650000	228400000	1091200000	153690000
P05030;P19657	Plasma membrane ATPase 1;Plasma membrane ATPase 2	PMA1;PMA2	sp|P05030|PMA1_YEAST Plasma membrane ATPase 1 OS=Saccharomyces cerevisiae (strain ATCC 204508 / S288c) GN=PMA1 PE=1 SV=2;sp|P19657|PMA2_YEAST Plasma membrane ATPase 2 OS=Saccharomyces cerevisiae (strain ATCC 204508 / S288c) GN=PMA2 PE=1 SV=3	2	29	33.6	99.618	918	0	323.31	129340000000	11380000	15344000	63064000	12127000000	3930100000	488520000	135930000	54159000	134800000	808750000	109190000	11085000	26329000	11193000	13195000000	7425800000	33519000000	20394000000	17377000000	5559800000	1888700000	898580000	7216100000	700240000	734500000	37422000	127390000	84041000	239260000	191490000	222480000	810570000	170610000	77085000	232870000	88440000	108800000	28134000
P40506	Phosphopantothenate--cysteine ligase CAB2	CAB2	sp|P40506|PPCS_YEAST Phosphopantothenate--cysteine ligase CAB2 OS=Saccharomyces cerevisiae (strain ATCC 204508 / S288c) GN=CAB2 PE=1 SV=2	1	15	49	41.866	365	0	153.39	2982600000	0	0	0	0	0	0	0	107720000	662490	745410000	1270500	0	0	0	1822000	0	573020000	0	0	0	0	0	0	0	0	661900000	74191000	28354000	7733500	4264300	1304700	10864000	0	6667700	2003700	804000	748560000	2044100
Q03768	Protein GIR2	GIR2	sp|Q03768|GIR2_YEAST Protein GIR2 OS=Saccharomyces cerevisiae (strain ATCC 204508 / S288c) GN=GIR2 PE=1 SV=1	1	3	13.2	31.03	265	0	23.575	1707700000	454580	0	782810000	7327200	12210000	20040000	19665000	11436000	8890900	719720000	0	0	2270100	0	0	0	1090400	0	0	0	0	0	0	5289500	0	0	75256000	27675000	10939000	2601400	0	0	0	0	0	0	0	0
P0CX36;P0CX35	40S ribosomal protein S4-B;40S ribosomal protein S4-A	RPS4B;RPS4A	sp|P0CX36|RS4B_YEAST 40S ribosomal protein S4-B OS=Saccharomyces cerevisiae (strain ATCC 204508 / S288c) GN=RPS4B PE=1 SV=1;sp|P0CX35|RS4A_YEAST 40S ribosomal protein S4-A OS=Saccharomyces cerevisiae (strain ATCC 204508 / S288c) GN=RPS4A PE=1 SV=1	2	19	55.9	29.41	261	0	323.31	45075000000	0	0	452920	0	2551300	7260700	62978000	3646700	58186000	557270000	2576200	562540	1128200	2210700	17381000	4784700	6587100	2986800	8422300	16584000	88340000	13599000	55244000	34752000	72788000	85651000	226700000	196920000	498790000	805250000	36449000000	2683600000	393870000	511890000	291690000	302290000	406380000	235870000
P33442	40S ribosomal protein S1-A	RPS1A	sp|P33442|RS3A1_YEAST 40S ribosomal protein S1-A OS=Saccharomyces cerevisiae (strain ATCC 204508 / S288c) GN=RPS1A PE=1 SV=2	1	18	57.6	28.743	255	0	53.554	8646100000	0	544870	0	33698000	512710	1907700	4454700	4559100	7163300	490740000	3428300	5661300	1421900	247680	0	0	0	0	0	605910	1361600	1428100	7619500	12242000	5873400	3709900	12533000	15537000	15712000	45545000	3196900000	3280600000	416880000	240360000	249460000	154950000	252010000	74294000
P38625	GMP synthase [glutamine-hydrolyzing]	GUA1	sp|P38625|GUAA_YEAST GMP synthase [glutamine-hydrolyzing] OS=Saccharomyces cerevisiae (strain ATCC 204508 / S288c) GN=GUA1 PE=1 SV=4	1	22	45.9	58.482	525	0	275.85	9445900000	760210000	1082000	429450000	268540000	328770000	0	706370000	438870000	3487100	480760000	0	209000000	0	277510	1489100	867920	205090000	121500000	74261000	4677500	329640000	349270000	26045000	3323600000	363400000	390520000	229010000	38640000	86045000	15855000	5994400	6767200	17593000	4263800	14664000	24327000	63666000	2257200
P32471	Elongation factor 1-beta	EFB1	sp|P32471|EF1B_YEAST Elongation factor 1-beta OS=Saccharomyces cerevisiae (strain ATCC 204508 / S288c) GN=EFB1 PE=1 SV=4	1	5	25.2	22.627	206	0	102.68	3162800000	0	0	1171700	0	0	0	0	0	2439100	472610000	0	0	1771200	3675200	0	0	0	0	0	0	0	5916300	5390000	0	0	0	0	0	4472400	11627000	93770000	2041100000	33408000	15526000	63542000	20723000	77723000	30428000
P05750	40S ribosomal protein S3	RPS3	sp|P05750|RS3_YEAST 40S ribosomal protein S3 OS=Saccharomyces cerevisiae (strain ATCC 204508 / S288c) GN=RPS3 PE=1 SV=5	1	13	56.7	26.502	240	0	323.31	19701000000	708660	4331600	438030	0	1253100	0	9090800	4883300	6974600	458100000	1857700	0	514040	0	0	1299300	2600000	3107400	0	2438800	0	3800700	2473900	2422300	0	2331900	8601700	23487000	140020000	85667000	2239600000	9867900000	3813400000	914220000	703390000	315710000	391660000	192540000
P32324	Elongation factor 2	EFT1	sp|P32324|EF2_YEAST Elongation factor 2 OS=Saccharomyces cerevisiae (strain ATCC 204508 / S288c) GN=EFT1 PE=1 SV=1	1	48	50.6	93.288	842	0	323.31	128600000000	70841000	85973000	134200000	72377000000	1065300000	709820000	1337500000	1242300000	740620000	369350000	218510000	167270000	206720000	232740000	790680000	1442600000	2816600000	1197500000	3355800000	1621700000	1982900000	1211100000	2595900000	2953400000	4295000000	6576500000	5101300000	1570000000	3838100000	1808400000	717580000	1175100000	787190000	854620000	980300000	413330000	545490000	208740000
P00950	Phosphoglycerate mutase 1	GPM1	sp|P00950|PMG1_YEAST Phosphoglycerate mutase 1 OS=Saccharomyces cerevisiae (strain ATCC 204508 / S288c) GN=GPM1 PE=1 SV=3	1	12	51.8	27.608	247	0	157.78	1363200000	0	0	0	0	0	0	11221000	1112300	9595500	348550000	0	0	0	0	0	0	0	0	0	459950	0	5527800	0	0	1141700	0	9801300	4209200	7175000	0	8081100	750820000	92304000	24671000	40982000	6539600	14882000	810200
P14126	60S ribosomal protein L3	RPL3	sp|P14126|RL3_YEAST 60S ribosomal protein L3 OS=Saccharomyces cerevisiae (strain ATCC 204508 / S288c) GN=RPL3 PE=1 SV=4	1	30	58.9	43.757	387	0	323.31	192130000000	5797000	0	2406500	211010000	283940000	3018900000	93519000000	504410000	552720000	304900000	53560000	35095000	16778000	89923000	489470000	448580000	858090000	393060000	561260000	337240000	1269400000	709200000	1479200000	1487400000	2739600000	10877000000	33482000000	20046000000	3905300000	2575800000	1221700000	2469000000	566340000	481960000	1208600000	571760000	1307500000	1286700000
Q02260	Small nuclear ribonucleoprotein Sm D1	SMD1	sp|Q02260|SMD1_YEAST Small nuclear ribonucleoprotein Sm D1 OS=Saccharomyces cerevisiae (strain ATCC 204508 / S288c) GN=SMD1 PE=1 SV=1	1	3	16.4	16.275	146	0	5.1326	7305100000	147560000	193470000	126070000	0	133420000	188710000	270160000	327190000	165080000	297670000	188760000	188730000	159790000	127890000	199010000	189980000	167490000	154300000	157250000	137040000	289070000	201330000	192310000	153610000	149810000	154820000	217390000	252360000	245640000	0	213440000	217110000	221460000	253210000	229910000	260090000	172080000	3193400
P20447	ATP-dependent RNA helicase DBP3	DBP3	sp|P20447|DBP3_YEAST ATP-dependent RNA helicase DBP3 OS=Saccharomyces cerevisiae (strain ATCC 204508 / S288c) GN=DBP3 PE=1 SV=2	1	6	13.6	58.826	523	0	14.907	2797900000	0	337090000	204530000	146930000	61758000	2612800	5634300	393430000	233570000	280340000	342180000	274750000	926260	307590000	28678000	9006800	5408400	0	2247300	1247300	0	0	0	0	23921000	27644000	14277000	8375800	22117000	9094900	8032700	3848700	3867500	7324000	12220000	5284100	7125800	2012600
P38427	Trehalose synthase complex regulatory subunit TSL1	TSL1	sp|P38427|TSL1_YEAST Trehalose synthase complex regulatory subunit TSL1 OS=Saccharomyces cerevisiae (strain ATCC 204508 / S288c) GN=TSL1 PE=1 SV=1	1	2	3.4	123.02	1098	0.0051053	1.9169	30875000000	277780000	31555000	38751000	49109000	65838000	15962000000	153250000	287900000	742320000	189630000	86745000	45043000	75969000	5731500	42422000	74081000	56116000	40384000	24219000	25944000	171180000	183070000	191780000	196780000	460230000	863420000	600960000	548080000	1069400000	2717200000	580850000	1021800000	843380000	315620000	214120000	535490000	1671700000	153770000
Q07915	Ribosome biogenesis protein RLP24	RLP24	sp|Q07915|RLP24_YEAST Ribosome biogenesis protein RLP24 OS=Saccharomyces cerevisiae (strain ATCC 204508 / S288c) GN=RLP24 PE=1 SV=1	1	5	20.1	23.975	199	0	116.96	4498800000	0	0	0	730590	5097900	0	2119000	0	1652700	174820000	1535200	0	0	0	2221100	2065500	0	0	0	3176000	39851000	16632000	1248300	25605000	16733000	95764000	161880000	96873000	192660000	307000000	450580000	2691300000	32681000	6254200	25602000	16476000	118380000	2117800
Q12117	Protein MRH1	MRH1	sp|Q12117|MRH1_YEAST Protein MRH1 OS=Saccharomyces cerevisiae (strain ATCC 204508 / S288c) GN=MRH1 PE=1 SV=1	1	4	15.6	36.19	320	0	83.283	3702500000	0	3704000	24137000	288900000	71563000	34142000	16090000	15705000	29215000	168930000	528700000	1614300	673340	22866000	487230000	327630000	71334000	44836000	49611000	30422000	100720000	83024000	122040000	35618000	27085000	24929000	21805000	19184000	28968000	58845000	125140000	361400000	353390000	35281000	20148000	0	0	13985000
P20433	DNA-directed RNA polymerase II subunit RPB4	RPB4	sp|P20433|RPB4_YEAST DNA-directed RNA polymerase II subunit RPB4 OS=Saccharomyces cerevisiae (strain ATCC 204508 / S288c) GN=RPB4 PE=1 SV=1	1	8	43	25.414	221	0	120.69	624110000	62718000	2685100	0	2241000	0	0	12417000	8383800	0	147210000	706140	1472600	1688700	8468300	0	0	0	0	0	1789300	0	1833600	0	12552000	0	1460300	0	0	0	0	23066000	334720000	0	691990	0	0	0	0
P38219	Obg-like ATPase 1	OLA1	sp|P38219|OLA1_YEAST Obg-like ATPase 1 OS=Saccharomyces cerevisiae (strain ATCC 204508 / S288c) GN=OLA1 PE=1 SV=1	1	24	48	44.174	394	0	323.31	22928000000	26571000	141940000	56974000	37513000	28348000	83501000	12511000000	298580000	233020000	146570000	43149000	13970000	35163000	101540000	45050000	55981000	90393000	43821000	59626000	33897000	137590000	90572000	84217000	51757000	111950000	1236200000	1875100000	445210000	756820000	616700000	328430000	725880000	362120000	314390000	204420000	162730000	469530000	402860000
Q05900	U1 small nuclear ribonucleoprotein C	YHC1	sp|Q05900|RU1C_YEAST U1 small nuclear ribonucleoprotein C OS=Saccharomyces cerevisiae (strain ATCC 204508 / S288c) GN=YHC1 PE=1 SV=1	1	8	34.6	27.044	231	0	51.766	3115700000	0	0	0	0	0	0	0	12552000	0	132440000	0	10707000	25900000	0	0	15254000	0	0	21138000	36634000	0	0	0	0	2342200	53532000	52733000	54336000	69094000	119240000	1070800000	1246400000	0	21493000	19542000	29832000	79317000	25785000
P06634;P24784	ATP-dependent RNA helicase DED1	DED1	sp|P06634|DED1_YEAST ATP-dependent RNA helicase DED1 OS=Saccharomyces cerevisiae (strain ATCC 204508 / S288c) GN=DED1 PE=1 SV=2	2	21	44.4	65.552	604	0	323.31	5359200000	125380000	75623000	46271000	99841000	90759000	112960000	228710000	119370000	0	131730000	147340000	134920000	125310000	129740000	158010000	75056000	724820	0	103080000	184850	1469500000	177710000	124990000	36898000	889160000	111270000	141000000	44900000	69470000	72466000	25305000	87324000	34288000	22837000	38395000	18442000	44723000	3875900
P06103	Eukaryotic translation initiation factor 3 subunit B	PRT1	sp|P06103|EIF3B_YEAST Eukaryotic translation initiation factor 3 subunit B OS=Saccharomyces cerevisiae (strain ATCC 204508 / S288c) GN=PRT1 PE=1 SV=1	1	32	41.2	88.129	763	0	323.31	5332600000	0	8716200	776750	4702400	94428000	110170000	13766000	98575000	116240000	127800000	0	1891900	0	0	0	3733400	3091400000	113000000	131440000	28514000	179950000	126470000	7781600	82783000	105780000	99524000	135570000	9560200	9648400	18105000	109730000	10819000	138140000	100340000	100520000	124650000	18089000	1193600
Q08032	Cell division control protein 45	CDC45	sp|Q08032|CDC45_YEAST Cell division control protein 45 OS=Saccharomyces cerevisiae (strain ATCC 204508 / S288c) GN=CDC45 PE=1 SV=1	1	4	6	74.248	650	0	5.4128	3324200000	0	82079000	47816000	0	133640000	79297000	90913000	0	119650000	112630000	124170000	134990000	109350000	142000000	132050000	104170000	99068000	3725700	110930000	149160000	114200000	150450000	126420000	2696400	0	0	117080000	102600000	0	113290000	139450000	105740000	0	113090000	129760000	132400000	73402000	128030000
Q3E757;P0C0W9	60S ribosomal protein L11-B;60S ribosomal protein L11-A	RPL11B;RPL11A	sp|Q3E757|RL11B_YEAST 60S ribosomal protein L11-B OS=Saccharomyces cerevisiae (strain ATCC 204508 / S288c) GN=RPL11B PE=1 SV=3;sp|P0C0W9|RL11A_YEAST 60S ribosomal protein L11-A OS=Saccharomyces cerevisiae (strain ATCC 204508 / S288c) GN=RPL11A PE=1 SV=2	2	10	52.9	19.749	174	0	214.82	15142000000	0	40002000	14601000	18001000	0	13240000	8266000	10366000	16153000	90679000	74666000	74569000	821150000	5457500	25468000	8121600	12886000	7883800	0	8498900	37666000	9931400	25406000	33742000	41342000	53670000	13272000	67337000	56101000	54694000	39562000	72338000	83736000	48003000	1124300000	11480000000	234200000	100680000
P28274;P38627	CTP synthase 1	URA7	sp|P28274|URA7_YEAST CTP synthase 1 OS=Saccharomyces cerevisiae (strain ATCC 204508 / S288c) GN=URA7 PE=1 SV=2	2	21	40.6	64.71	579	0	323.31	9238600000	187050000	250330000	162810000	226870000	598660000	210290000	45113000	175800000	195920000	88979000	104000000	73399000	114890000	200430000	226890000	289590000	197140000	142780000	120810000	98235000	1606900000	463600000	355490000	67559000	198100000	136670000	146500000	624350000	88958000	243600000	134970000	196610000	75116000	77933000	168800000	30831000	58366000	31250000
P46654;P32905	40S ribosomal protein S0-B;40S ribosomal protein S0-A	RPS0B;RPS0A	sp|P46654|RSSA2_YEAST 40S ribosomal protein S0-B OS=Saccharomyces cerevisiae (strain ATCC 204508 / S288c) GN=RPS0B PE=1 SV=2;sp|P32905|RSSA1_YEAST 40S ribosomal protein S0-A OS=Saccharomyces cerevisiae (strain ATCC 204508 / S288c) GN=RPS0A PE=1 SV=3	2	9	38.1	27.962	252	0	323.31	12704000000	0	0	3455600	0	659290	0	438720	1934400	0	73726000	0	278190	0	332430	0	0	0	4841200	3303500	0	37748000	3675600	10043000	0	4050500	13432000	7575600	11322000	9423400	24138000	105040000	5944800000	2066400000	1238900000	930110000	613530000	642720000	362790000
P32481	Eukaryotic translation initiation factor 2 subunit gamma	GCD11	sp|P32481|IF2G_YEAST Eukaryotic translation initiation factor 2 subunit gamma OS=Saccharomyces cerevisiae (strain ATCC 204508 / S288c) GN=GCD11 PE=1 SV=1	1	9	21.1	57.865	527	0	136.31	5451000000	175990000	132240000	98344000	119640000	136000000	151270000	184310000	142590000	149490000	70002000	170840000	150240000	104320000	61909000	127530000	36781000	102470000	82292000	71278000	92190000	107260000	237860000	276340000	91047000	164800000	167390000	148950000	188580000	230090000	2495200	189680000	45940000	201830000	176100000	136690000	195130000	179840000	0
Q12134	Protein HUA2	HUA2	sp|Q12134|HUA2_YEAST Protein HUA2 OS=Saccharomyces cerevisiae (strain ATCC 204508 / S288c) GN=HUA2 PE=1 SV=1	1	8	35.8	28.414	243	0	107.5	715670000	0	0	0	0	0	0	0	0	0	69029000	3578000	0	0	0	0	0	0	0	0	0	0	3739000	0	0	0	0	0	0	0	0	32744000	579500000	16485000	945280	0	0	0	3079100
P38079	Protein YRO2	YRO2	sp|P38079|YRO2_YEAST Protein YRO2 OS=Saccharomyces cerevisiae (strain ATCC 204508 / S288c) GN=YRO2 PE=1 SV=1	1	3	12.5	38.719	344	0	9.5162	354420000	0	0	0	8087500	5757200	0	0	0	5078600	68607000	0	0	0	0	19188000	8663100	0	1737200	0	0	0	0	0	0	0	0	6508600	4085900	8142700	16504000	157810000	8989400	17915000	17348000	0	0	0	0
P07283	Phosphomannomutase	SEC53	sp|P07283|PMM_YEAST Phosphomannomutase OS=Saccharomyces cerevisiae (strain ATCC 204508 / S288c) GN=SEC53 PE=1 SV=1	1	16	59.1	29.063	254	0	323.31	9073000000	2092700	0	0	0	0	0	0	676290	714380	68160000	2607400	0	306360	0	3194600	2920400	3440100	1381500	1544000	6496900	14750000	6374600	29253000	12083000	23065000	13847000	26343000	6208800	17247000	33248000	556440000	5391700000	1203300000	497760000	462900000	365710000	89148000	40126000
Q99314	Something about silencing protein 5	SAS5	sp|Q99314|SAS5_YEAST Something about silencing protein 5 OS=Saccharomyces cerevisiae (strain ATCC 204508 / S288c) GN=SAS5 PE=1 SV=1	1	9	34.7	29.018	248	0	43.711	552380000	0	2241700	0	1463400	1214300	0	2113700	0	0	59628000	0	0	0	0	13405000	597180	2464500	0	0	0	0	0	3451400	0	0	115110000	32722000	8443100	10220000	25027000	29089000	238570000	0	0	0	0	3354400	3261900
P36009	Probable ATP-dependent RNA helicase DHR2	DHR2	sp|P36009|DHR2_YEAST Probable ATP-dependent RNA helicase DHR2 OS=Saccharomyces cerevisiae (strain ATCC 204508 / S288c) GN=DHR2 PE=1 SV=1	1	12	18	82.712	735	0	95.752	1118100000	88616000	54267000	41434000	52626000	12330000	15049000	31027000	21305000	14986000	50279000	18921000	33145000	25878000	18952000	15876000	18497000	27283000	28432000	111760000	229400000	0	0	32354000	0	39182000	43673000	24775000	0	0	4664200	0	19861000	4117300	6305000	0	0	9411000	0
P14020	Dolichol-phosphate mannosyltransferase	DPM1	sp|P14020|DPM1_YEAST Dolichol-phosphate mannosyltransferase OS=Saccharomyces cerevisiae (strain ATCC 204508 / S288c) GN=DPM1 PE=1 SV=3	1	8	37.8	30.362	267	0	98.02	233470000	4211300	0	0	0	0	0	0	0	0	50066000	0	0	0	0	0	0	0	3222300	1454000	0	0	0	0	0	0	0	0	0	0	0	14365000	157440000	0	2710700	0	0	0	0
P36008	Elongation factor 1-gamma 2	TEF4	sp|P36008|EF1G2_YEAST Elongation factor 1-gamma 2 OS=Saccharomyces cerevisiae (strain ATCC 204508 / S288c) GN=TEF4 PE=1 SV=1	1	20	43.7	46.52	412	0	323.31	14430000000	25663000	16304000	11065000	10146000	19663000	11094000000	78144000	65707000	106890000	49562000	22913000	9126800	40214000	18035000	4498000	9437900	6466000	3654300	1291300	2396300	17659000	48600000	44393000	7383000	51013000	219560000	422290000	143470000	164940000	228920000	362490000	319290000	113050000	79267000	135130000	90542000	169610000	98687000
P16521	Elongation factor 3A	YEF3	sp|P16521|EF3A_YEAST Elongation factor 3A OS=Saccharomyces cerevisiae (strain ATCC 204508 / S288c) GN=YEF3 PE=1 SV=4	1	46	42	115.94	1044	0	323.31	41287000000	27758000	4334600	2531600	210620000	62119000	136140000	1237000000	39031000	38364000	46560000	5531600	2819100	714750	1087900	29170000000	962700000	1036400000	384210000	715670000	358570000	678080000	580390000	627150000	190000000	667390000	149940000	371090000	179100000	374820000	450170000	379270000	518650000	123020000	134530000	353780000	318550000	268770000	116740000
P10592	Heat shock protein SSA2	SSA2	sp|P10592|HSP72_YEAST Heat shock protein SSA2 OS=Saccharomyces cerevisiae (strain ATCC 204508 / S288c) GN=SSA2 PE=1 SV=3	1	42	66	69.469	639	0	323.31	51512000000	5538600	17933000	13060000	53392000	30201000000	261970000	92449000	123050000	187960000	41383000	21903000	8427700	16169000	2926400	125830000	97905000	85393000	56279000	115380000	115300000	1624200000	2799500000	571810000	464980000	486650000	2430200000	2259300000	716480000	900130000	1575700000	905540000	658600000	845790000	457220000	1174500000	451300000	695380000	321270000
P23724	Proteasome subunit beta type-6	PRE7	sp|P23724|PSB6_YEAST Proteasome subunit beta type-6 OS=Saccharomyces cerevisiae (strain ATCC 204508 / S288c) GN=PRE7 PE=1 SV=1	1	5	21.2	26.871	241	0	11.044	149710000	0	0	0	0	0	8845700	0	0	0	32931000	0	1348100	0	0	0	0	0	0	0	0	0	0	0	0	0	0	0	0	0	0	27447000	69030000	0	3417700	0	0	6694500	0
P00359	Glyceraldehyde-3-phosphate dehydrogenase 3	TDH3	sp|P00359|G3P3_YEAST Glyceraldehyde-3-phosphate dehydrogenase 3 OS=Saccharomyces cerevisiae (strain ATCC 204508 / S288c) GN=TDH3 PE=1 SV=3	1	19	49.1	35.746	332	0	323.31	92856000000	26020000	19962000	10767000	22900000	30691000	52305000	47521000	71319000	256770000	32353000	25760000	8280900	28232000	17072000	64460000	39913000	60208000	46972000	72234000	53373000	99876000	256080000	169300000	83660000	165950000	309930000	3765500000	72070000000	1986000000	2417000000	390610000	904960000	1114800000	1234800000	1899800000	998900000	2227500000	467790000
P46948	Exosome complex component SKI6	SKI6	sp|P46948|RRP41_YEAST Exosome complex component SKI6 OS=Saccharomyces cerevisiae (strain ATCC 204508 / S288c) GN=SKI6 PE=1 SV=1	1	11	41.9	27.56	246	0	113.11	1003400000	0	0	0	0	0	0	0	0	1691100	32284000	0	0	0	0	0	0	0	0	0	0	0	0	5436500	0	0	0	0	0	0	0	795060000	164370000	0	0	4599400	0	0	0
P29509	Thioredoxin reductase 1	TRR1	sp|P29509|TRXB1_YEAST Thioredoxin reductase 1 OS=Saccharomyces cerevisiae (strain ATCC 204508 / S288c) GN=TRR1 PE=1 SV=3	1	1	3.8	34.238	319	0	4.3893	239940000	31160000	16066000	9216800	23301000	16051000	14071000	31513000	13478000	5820000	32100000	0	0	0	0	0	0	0	0	0	0	0	0	19568000	0	0	11473000	0	0	11386000	4739300	0	0	0	0	0	0	0	0
Q02948	Vacuolar protein sorting-associated protein 30	VPS30	sp|Q02948|BECN1_YEAST Vacuolar protein sorting-associated protein 30 OS=Saccharomyces cerevisiae (strain ATCC 204508 / S288c) GN=VPS30 PE=1 SV=1	1	2	4.1	63.26	557	0	2.7569	1015000000	22214000	7290900	1405600	1431600	4637800	3104600	1322000	2565500	1738300	29707000	1956000	64892000	4708300	24329000	19348000	2375500	15914000	3101100	13022000	6130100	23105000	0	0	0	5630800	0	4068400	2681400	25624000	10812000	88443000	73646000	28447000	309700000	51735000	33851000	24234000	49077000
P25343	Reduced viability upon starvation protein 161	RVS161	sp|P25343|RV161_YEAST Reduced viability upon starvation protein 161 OS=Saccharomyces cerevisiae (strain ATCC 204508 / S288c) GN=RVS161 PE=1 SV=1	1	7	27.9	30.25	265	0	154.91	590030000	0	715410	0	0	0	0	4515400	0	1031400	29242000	0	0	857350	0	0	0	6958700	0	0	0	582760	700760	0	8349200	0	0	8578100	2149100	0	0	411850000	47419000	6743500	1745200	2700500	21341000	19301000	3325600
P40150	Heat shock protein SSB2	SSB2	sp|P40150|HSP76_YEAST Heat shock protein SSB2 OS=Saccharomyces cerevisiae (strain ATCC 204508 / S288c) GN=SSB2 PE=1 SV=2	1	31	54.8	66.594	613	0	323.31	103350000000	0	0	2032500	20997000	3533800000	102770000	66220000	55587000	49262000	27875000	6945900	713160	4417700	0	148750000	114600000	100670000	71656000	162020000	152410000	72579000000	1517100000	4204200000	1459000000	1489400000	1015000000	2176300000	1189600000	2890700000	1203600000	851020000	908040000	1478000000	723530000	1943400000	740260000	975650000	488040000
P53221	60S ribosomal protein L26-B	RPL26B	sp|P53221|RL26B_YEAST 60S ribosomal protein L26-B OS=Saccharomyces cerevisiae (strain ATCC 204508 / S288c) GN=RPL26B PE=1 SV=2	1	11	53.5	14.235	127	0	122.17	7632400000	29549000	16235000	19707000	17562000	15034000	19614000	17964000	14563000	17163000	27430000	27892000	27853000	21720000	17634000	21229000	11084000	13498000	12613000	8547400	11770000	11111000	14058000	15000000	15620000	15924000	12062000	16090000	20364000	20892000	13032000	19614000	14605000	13639000	11877000	47580000	67825000	5610700000	701240000
P40339	Replication factor C subunit 4	RFC4	sp|P40339|RFC4_YEAST Replication factor C subunit 4 OS=Saccharomyces cerevisiae (strain ATCC 204508 / S288c) GN=RFC4 PE=1 SV=1	1	15	53.9	36.149	323	0	323.31	1873100000	26478000	18673000	35550000	19395000	13074000	20019000	24928000	12670000	15671000	26478000	14647000	61753000	21023000	0	10623000	45136000	63479000	13114000	28380000	1367100	106750000	0	69071000	4460900	0	1471000	3030100	0	643180000	332630000	25986000	20666000	41226000	14656000	6818800	2472200	31829000	51062000
P06208;Q12166	2-isopropylmalate synthase	LEU4	sp|P06208|LEU1_YEAST 2-isopropylmalate synthase OS=Saccharomyces cerevisiae (strain ATCC 204508 / S288c) GN=LEU4 PE=1 SV=1	2	4	5.3	68.408	619	0	7.2749	1274300000	25863000	9849400	3786000	175810000	0	24519000	2106200	0	0	26017000	0	81252000	0	0	0	543190	23534000	58962000	0	9903300	70521000	20795000	0	0	185450000	244070000	24489000	70876000	15035000	2932500	0	0	97284000	1669900	21117000	730550	4119000	706880
P35189	Transcription initiation factor TFIID subunit 14	TAF14	sp|P35189|TAF14_YEAST Transcription initiation factor TFIID subunit 14 OS=Saccharomyces cerevisiae (strain ATCC 204508 / S288c) GN=TAF14 PE=1 SV=1	1	6	29.1	27.44	244	0	77.124	196030000	0	0	0	0	0	0	0	0	0	25848000	0	0	0	0	0	213310	0	0	1265300	1971800	8147000	0	1887200	0	0	0	0	3281100	0	0	0	142410000	0	8981200	0	0	2022000	0
P36068	SWI5-dependent HO expression protein 2	SHE2	sp|P36068|SHE2_YEAST SWI5-dependent HO expression protein 2 OS=Saccharomyces cerevisiae (strain ATCC 204508 / S288c) GN=SHE2 PE=1 SV=1	1	5	23.6	28.251	246	0	95.394	460920000	849080	0	0	0	0	0	0	634060	0	25692000	0	0	0	0	0	0	0	0	0	0	0	0	0	0	0	0	0	0	0	620510	73518000	333310000	7280300	2633800	1882200	8948400	4627700	924030
P39985	DNA polymerase V	POL5	sp|P39985|DPO5_YEAST DNA polymerase V OS=Saccharomyces cerevisiae (strain ATCC 204508 / S288c) GN=POL5 PE=1 SV=1	1	19	18.9	115.89	1022	0	195.8	1735900000	53049000	35803000	10591000	20560000	34844000	41402000	30718000	37067000	32238000	24894000	48823000	48438000	54269000	62065000	378150000	0	41537000	43774000	66451000	51163000	27622000	51440000	45465000	0	2285800	16297000	57767000	23437000	65960000	26972000	78719000	22865000	22142000	7566900	8299200	70654000	482340	53303000
P38626	NADH-cytochrome b5 reductase 1	CBR1	sp|P38626|NCB5R_YEAST NADH-cytochrome b5 reductase 1 OS=Saccharomyces cerevisiae (strain ATCC 204508 / S288c) GN=CBR1 PE=1 SV=2	1	16	48.9	31.493	284	0	211.49	1583100000	1229500	0	0	0	0	1004600	0	855760	0	24564000	0	0	0	0	0	0	0	1820600	2037100	0	7149300	0	0	0	2038600	130390	0	3679800	0	0	1063800000	350480000	6581700	17994000	16169000	16951000	26478000	1612200
P40160	Serine/threonine-protein kinase RIO2	RIO2	sp|P40160|RIO2_YEAST Serine/threonine-protein kinase RIO2 OS=Saccharomyces cerevisiae (strain ATCC 204508 / S288c) GN=RIO2 PE=1 SV=1	1	11	32.5	49.124	425	0	217.43	1794200000	0	0	0	20691000	0	33979000	34897000	15900000	24986000	24382000	22618000	14146000	25287000	13811000	0	0	570880	0	12803000	0	19050000	0	0	24234000	1091100000	29245000	129150000	136690000	31664000	49584000	3887900	8256600	0	8673800	3457600	5455900	3050000	0
Q12143	Kinetochore-associated protein NSL1	NSL1	sp|Q12143|NSL1_YEAST Kinetochore-associated protein NSL1 OS=Saccharomyces cerevisiae (strain ATCC 204508 / S288c) GN=NSL1 PE=1 SV=1	1	7	32.9	25.416	216	0	22.824	1060100000	28137000	22930000	14210000	29573000	26354000	27453000	21724000	23783000	24888000	24162000	32812000	46911000	26906000	36013000	36579000	25376000	25762000	18262000	27732000	38837000	33830000	31115000	32325000	26056000	24124000	34337000	32675000	28593000	38951000	25565000	41252000	0	33092000	90227000	3059900	0	23749000	2778800
P53866	Protein SQS1	SQS1	sp|P53866|SQS1_YEAST Protein SQS1 OS=Saccharomyces cerevisiae (strain ATCC 204508 / S288c) GN=SQS1 PE=1 SV=1	1	22	30.6	86.949	767	0	323.31	1791000000	0	0	0	2011400	0	1777600	0	0	656120	24078000	23776000	0	925580	0	0	1328400000	2041600	3774300	11507000	52587000	63955000	13798000	3787000	34851000	108670000	14322000	12122000	3400400	177980	8509800	2606600	1343200	874870	0	0	43169000	2566500	0
P60010	Actin	ACT1	sp|P60010|ACT_YEAST Actin OS=Saccharomyces cerevisiae (strain ATCC 204508 / S288c) GN=ACT1 PE=1 SV=1	1	14	45.6	41.689	375	0	253.33	4782900000	43986000	41386000	38756000	20844000	25055000	64553000	355890000	275270000	15065000	22860000	17088000	13910000	10204000	8660300	21858000	22152000	13298000	25465000	12162000	7877500	40954000	19257000	45895000	7470400	35837000	1637400000	558600000	265140000	153430000	76585000	153150000	190660000	118450000	67354000	34702000	9263700	110190000	40628000
P25443	40S ribosomal protein S2	RPS2	sp|P25443|RS2_YEAST 40S ribosomal protein S2 OS=Saccharomyces cerevisiae (strain ATCC 204508 / S288c) GN=RPS2 PE=1 SV=3	1	8	35	27.449	254	0	261.83	5670700000	0	0	1379800	0	704810	2011400	1454200	1232700	0	22380000	0	2316700	0	0	1858800	0	2005800	0	0	0	3235200	3266100	15206000	2289600	15405000	122990000	183210000	156180000	156700000	267930000	591340000	2838100000	353760000	155650000	176650000	111290000	261670000	89714000
P26321	60S ribosomal protein L5	RPL5	sp|P26321|RL5_YEAST 60S ribosomal protein L5 OS=Saccharomyces cerevisiae (strain ATCC 204508 / S288c) GN=RPL5 PE=1 SV=4	1	11	48.5	33.714	297	0	323.31	32311000000	0	0	0	0	2287900	22917000	81717000	189990000	5280100000	22261000	9385600	5251000	4511000	0	0	7223300	3991100	0	836840	9241800	4256700	5361200	30548000	0	15284000	95684000	845010000	4003100000	18070000000	1117700000	711840000	475400000	375730000	115900000	306820000	68039000	275020000	35994000
Q12103	Putative lipase YDL109C		sp|Q12103|YD109_YEAST Putative lipase YDL109C OS=Saccharomyces cerevisiae (strain ATCC 204508 / S288c) GN=YDL109C PE=1 SV=1	1	1	1.2	72.855	647	0.0092822	1.6963	893130000	21934000	26036000	18733000	0	21462000	36891000	32088000	23400000	22069000	22248000	23806000	16017000	19551000	25056000	27123000	18674000	16504000	12434000	15340000	14666000	27465000	22364000	26608000	18034000	20658000	19453000	27589000	21272000	0	26290000	28338000	25742000	23421000	18835000	38193000	23275000	33436000	26107000
P53843	Vacuolar protein sorting-associated protein IST1	IST1	sp|P53843|IST1_YEAST Vacuolar protein sorting-associated protein IST1 OS=Saccharomyces cerevisiae (strain ATCC 204508 / S288c) GN=IST1 PE=1 SV=1	1	9	30.2	34.495	298	0	82.796	570380000	0	6435600	3829700	7341500	11428000	0	0	64650000	7071000	21925000	8166600	6052200	8642500	0	9729300	6474100	0	5958900	3756900	4392100	6224100	0	15294000	28231000	39040000	188260000	9980900	0	12036000	9862700	0	31917000	10903000	3164000	0	17947000	19592000	0
P36006	Myosin-3	MYO3	sp|P36006|MYO3_YEAST Myosin-3 OS=Saccharomyces cerevisiae (strain ATCC 204508 / S288c) GN=MYO3 PE=1 SV=4	1	5	4	142.45	1272	0	7.0413	5259200000	22998000	100900000	16182000	7991600	16652000	3759400000	27514000	68899000	25478000	21334000	7688200	0	10005000	0	29761000	20970000	12350000	10043000	0	13272000	20026000	23990000	27907000	39245000	84016000	109870000	75300000	35289000	27902000	50552000	33898000	80821000	33937000	43727000	71506000	50695000	231640000	0
P22202	Heat shock protein SSA4	SSA4	sp|P22202|HSP74_YEAST Heat shock protein SSA4 OS=Saccharomyces cerevisiae (strain ATCC 204508 / S288c) GN=SSA4 PE=1 SV=3	1	17	26.2	69.65	642	0	54.306	2024800000	24438000	764310	3083800	0	55083000	824500000	0	9733900	42395000	20915000	16574000	4321800	1919600	0	0	5995600	1550300	0	0	1035600	25506000	11719000	19675000	1277100	34227000	57581000	60230000	38531000	98938000	359660000	336950	91101000	28987000	18888000	13565000	19147000	106120000	17361000
P32379	Proteasome subunit alpha type-5	PUP2	sp|P32379|PSA5_YEAST Proteasome subunit alpha type-5 OS=Saccharomyces cerevisiae (strain ATCC 204508 / S288c) GN=PUP2 PE=1 SV=2	1	5	19.2	28.617	260	0	18.347	245730000	0	0	0	0	1407400	0	0	0	0	20321000	0	0	0	0	0	0	0	0	0	0	0	0	0	0	0	0	0	0	877790	0	10819000	187200000	24109000	0	0	0	0	997590
P30657	Proteasome subunit beta type-7	PRE4	sp|P30657|PSB7_YEAST Proteasome subunit beta type-7 OS=Saccharomyces cerevisiae (strain ATCC 204508 / S288c) GN=PRE4 PE=1 SV=1	1	4	15.8	29.443	266	0	33.027	326700000	0	4555800	2292600	0	1989400	0	0	2916000	3420600	19847000	2846500	0	0	0	3267600	1739500	0	0	0	0	2132500	0	1853200	1345000	1948400	0	0	0	0	1489800	80338000	153360000	8217200	10372000	10922000	0	4793300	7054300
P47085	MEMO1 family protein YJR008W		sp|P47085|YJX8_YEAST MEMO1 family protein YJR008W OS=Saccharomyces cerevisiae (strain ATCC 204508 / S288c) GN=YJR008W PE=1 SV=1	1	7	24.9	38.481	338	0	38.168	1303200000	0	0	0	0	0	0	0	0	0	19733000	0	0	0	0	0	0	0	0	0	0	0	0	59491000	4087400	0	0	255050000	3755000	4262500	8790500	55138000	602150000	235700000	36511000	8198900	10343000	0	0
P25617	Uncharacterized protein YCR016W		sp|P25617|YCQ6_YEAST Uncharacterized protein YCR016W OS=Saccharomyces cerevisiae (strain ATCC 204508 / S288c) GN=YCR016W PE=1 SV=2	1	4	20.3	33.593	290	0	112.34	792420000	15180000	9734200	9901600	11944000	28150000	8475100	15418000	19774000	13367000	18916000	20560000	16696000	16399000	10167000	19321000	16278000	13158000	10570000	0	16952000	0	0	0	18413000	21748000	113600000	110560000	4430700	15053000	15619000	27401000	5661800	23803000	18891000	24725000	21516000	18422000	23713000
P53200	Protein-lysine N-methyltransferase EFM5	EFM5	sp|P53200|EFM5_YEAST Protein-lysine N-methyltransferase EFM5 OS=Saccharomyces cerevisiae (strain ATCC 204508 / S288c) GN=EFM5 PE=1 SV=2	1	7	22.6	28.582	248	0	234.6	672790000	0	0	0	0	0	8436600	0	0	0	17974000	0	0	5764600	0	0	0	0	0	0	0	0	0	0	0	0	5748700	0	0	0	662210	381020000	178620000	20815000	11928000	13934000	14142000	6103500	3259700
P89886	Translation machinery-associated protein 20	TMA20	sp|P89886|TMA20_YEAST Translation machinery-associated protein 20 OS=Saccharomyces cerevisiae (strain ATCC 204508 / S288c) GN=TMA20 PE=1 SV=1	1	8	39.8	20.277	181	0	73.833	448580000	0	2958000	3668600	11072000	0	4188900	3089400	3123300	3300400	17867000	0	0	26833000	0	0	6809500	8931900	6581200	0	4095800	10523000	0	0	14396000	14197000	1006100	0	17855000	0	5552400	3072700	16150000	20274000	0	1015200	187460000	20667000	5282800
P17076	60S ribosomal protein L8-A	RPL8A	sp|P17076|RL8A_YEAST 60S ribosomal protein L8-A OS=Saccharomyces cerevisiae (strain ATCC 204508 / S288c) GN=RPL8A PE=1 SV=4	1	21	60.9	28.124	256	0	106.75	665670000	0	0	0	0	0	0	0	0	0	17095000	0	0	0	0	0	0	0	0	0	0	0	0	5838100	0	0	3734300	14006000	4363400	16471000	19299000	442300000	72973000	18487000	20510000	20537000	8149300	0	1061200
P32791	Ferric/cupric reductase transmembrane component 1	FRE1	sp|P32791|FRE1_YEAST Ferric/cupric reductase transmembrane component 1 OS=Saccharomyces cerevisiae (strain ATCC 204508 / S288c) GN=FRE1 PE=1 SV=1	1	7	11.4	78.853	686	0	19.86	1969200000	0	2140000	1294000	15130000	12253000	5499500	5294600	44801000	36494000	16691000	38588000	7658700	11816000	4693900	32991000	0	0	0	3898000	0	0	0	0	0	0	19983000	47172000	16797000	10144000	5540700	2128600	3599700	12539000	3457200	10463000	4346200	1574400000	19364000
P38911	FK506-binding nuclear protein	FPR3	sp|P38911|FKBP3_YEAST FK506-binding nuclear protein OS=Saccharomyces cerevisiae (strain ATCC 204508 / S288c) GN=FPR3 PE=1 SV=2	1	11	34.3	46.553	411	0	323.31	16422000000	0	944250	0	292010	16693000	7421600	38389000	498040	13505000	16522000	6430100	0	0	0	612610000	398380000	344730000	202330000	375340000	308680000	562370000	614370000	2080300000	9268700000	147490000	59632000	45085000	29517000	101460000	233070000	269750000	221950000	107920000	53284000	12751000	10250000	51417000	154450000
P10664	60S ribosomal protein L4-A	RPL4A	sp|P10664|RL4A_YEAST 60S ribosomal protein L4-A OS=Saccharomyces cerevisiae (strain ATCC 204508 / S288c) GN=RPL4A PE=1 SV=4	1	22	59.1	39.092	362	0	323.31	170270000000	0	559040	1862600	6985800	15293000	92418000	192220000	14772000000	863380000	16507000	2483400	911620	9191300	8635500	135660000	124600000	363040000	228840000	622790000	385980000	508150000	240910000	296850000	133690000	442820000	106160000000	20383000000	6409200000	5605800000	2763300000	1364500000	1026100000	1772200000	948090000	1233500000	587080000	1019900000	479730000
Q12078	Iron transporter SMF3	SMF3	sp|Q12078|SMF3_YEAST Iron transporter SMF3 OS=Saccharomyces cerevisiae (strain ATCC 204508 / S288c) GN=SMF3 PE=1 SV=1	1	1	1.7	51.775	473	0.0093226	1.7172	237170000	17214000	10384000	8446400	1136900	0	6263200	0	0	0	16391000	18543000	9917300	4089800	997120	4233900	4968200	0	4908700	0	0	12089000	0	16010000	14313000	21842000	12697000	19754000	0	0	0	4610800	0	0	0	0	0	0	14100000
P36017	Vacuolar protein sorting-associated protein 21	VPS21	sp|P36017|VPS21_YEAST Vacuolar protein sorting-associated protein 21 OS=Saccharomyces cerevisiae (strain ATCC 204508 / S288c) GN=VPS21 PE=1 SV=1	1	12	55.7	23.081	210	0	196.5	1186200000	6568400	0	0	972790	0	0	0	0	0	16281000	0	4317700	0	0	0	0	0	0	0	0	2615800	0	0	18436000	0	0	0	27289000	0	0	0	0	97501000	415470000	51511000	45841000	399180000	25675000
P43582	WW domain-containing protein WWM1	WWM1	sp|P43582|WWM1_YEAST WW domain-containing protein WWM1 OS=Saccharomyces cerevisiae (strain ATCC 204508 / S288c) GN=WWM1 PE=1 SV=1	1	3	30.8	22.655	211	0	37.878	192050000	0	0	0	0	0	3568400	0	0	0	15852000	0	4146700	0	0	0	0	0	0	0	0	0	0	0	0	0	3817700	0	4354000	0	0	2005100	158300000	0	0	0	0	0	0
P20424	Signal recognition particle subunit SRP54	SRP54	sp|P20424|SRP54_YEAST Signal recognition particle subunit SRP54 OS=Saccharomyces cerevisiae (strain ATCC 204508 / S288c) GN=SRP54 PE=1 SV=2	1	13	24.6	59.624	541	0	82.644	1111500000	2568500	0	2261400	1034200	1702400	0	2346800	3127100	22225000	15632000	0	708890	2374500	3110800	0	1153100	0	1511300	0	3364900	0	0	39208000	560950000	41061000	11828000	5930300	9403600	188080000	95065000	6199500	17418000	4451000	3647900	5572800	32596000	22453000	0
P22146	1,3-beta-glucanosyltransferase GAS1	GAS1	sp|P22146|GAS1_YEAST 1,3-beta-glucanosyltransferase GAS1 OS=Saccharomyces cerevisiae (strain ATCC 204508 / S288c) GN=GAS1 PE=1 SV=2	1	8	13.2	59.582	559	0	261.12	3440300000	0	0	0	104990000	62912000	10351000	43460000	2561900	1784900	15259000	9250500	0	0	0	2862000000	45483000	21520000	22455000	37430000	42418000	12025000	13425000	25542000	0	9950800	0	0	1758600	2130100	4797300	20622000	13540000	40461000	4860600	3429800	1157500	4698800	0
P53889	Uncharacterized mitochondrial hydrolase FMP41	FMP41	sp|P53889|FMP41_YEAST Uncharacterized mitochondrial hydrolase FMP41 OS=Saccharomyces cerevisiae (strain ATCC 204508 / S288c) GN=FMP41 PE=1 SV=1	1	3	11.6	28.792	259	0	19.71	158310000	0	0	0	0	0	0	0	0	0	15101000	0	0	0	0	0	0	0	0	0	0	0	0	4187100	0	0	0	13088000	0	0	0	92679000	26529000	0	4391700	2334200	0	0	0
P34162	Mediator of RNA polymerase II transcription subunit 20	SRB2	sp|P34162|MED20_YEAST Mediator of RNA polymerase II transcription subunit 20 OS=Saccharomyces cerevisiae (strain ATCC 204508 / S288c) GN=SRB2 PE=1 SV=1	1	7	35.7	22.894	210	0	44.279	259120000	0	0	0	11916000	0	0	0	0	35027000	14086000	0	0	0	0	0	0	0	0	0	0	53664000	0	0	0	0	0	3110000	2284100	0	0	0	4895600	2677900	4910900	124070000	2484100	0	0
Q01560	Nucleolar protein 3	NPL3	sp|Q01560|NOP3_YEAST Nucleolar protein 3 OS=Saccharomyces cerevisiae (strain ATCC 204508 / S288c) GN=NPL3 PE=1 SV=1	1	6	12.3	45.407	414	0	56.287	306370000	0	0	4121000	0	848460	150420	1726500	0	2353900	14086000	859030	2379900	693810	0	0	955110	1549600	2923700	0	0	12882000	0	0	3904600	145690000	8550800	36255000	14293000	0	15329000	2364600	9977000	4063800	2833100	0	0	13836000	194100
P25349	Flavoprotein-like protein YCP4	YCP4	sp|P25349|YCP4_YEAST Flavoprotein-like protein YCP4 OS=Saccharomyces cerevisiae (strain ATCC 204508 / S288c) GN=YCP4 PE=1 SV=1	1	3	14.2	26.35	247	0	4.001	528810000	20587000	9723700	14821000	3606800	7817100	0	2705200	5360300	492820	14036000	34311000	20529000	17014000	7501200	0	6927400	13174000	6825400	2996600	0	29068000	0	26000000	3944100	0	0	20197000	41196000	17532000	22115000	6674100	48429000	18876000	12143000	3046400	12364000	16204000	27273000
P05748	60S ribosomal protein L15-A	RPL15A	sp|P05748|RL15A_YEAST 60S ribosomal protein L15-A OS=Saccharomyces cerevisiae (strain ATCC 204508 / S288c) GN=RPL15A PE=1 SV=3	1	8	31.9	24.422	204	0	301.89	14631000000	0	0	0	0	0	0	950750	2589600	8255800	13996000	1014500000	730490	2676600	0	12781000	2693300	13352000	8878000	6064900	12229000	33566000	37677000	45732000	24411000	51677000	46960000	74679000	77343000	62594000	128170000	100680000	207300000	10927000000	801420000	104420000	255950000	322820000	103940000
P25491	Mitochondrial protein import protein MAS5	YDJ1	sp|P25491|MAS5_YEAST Mitochondrial protein import protein MAS5 OS=Saccharomyces cerevisiae (strain ATCC 204508 / S288c) GN=YDJ1 PE=1 SV=1	1	15	36.2	44.67	409	0	323.31	4995200000	8637900	17541000	1184700	6112900	9020900	2926800000	163500000	26496000	35683000	13905000	23317000	16838000	11622000	5293700	0	4504900	7517800	3601600	19931000	7094400	6210500	10977000	5633700	9986500	29804000	82587000	108750000	79412000	856110000	126960000	44648000	32421000	74092000	67575000	34893000	22472000	45368000	34483000
P33201	Ribosome assembly factor MRT4	MRT4	sp|P33201|MRT4_YEAST Ribosome assembly factor MRT4 OS=Saccharomyces cerevisiae (strain ATCC 204508 / S288c) GN=MRT4 PE=1 SV=1	1	12	49.6	27.058	236	0	251.16	2072600000	0	0	0	0	0	0	6298500	0	6309200	13620000	0	0	24489000	0	4419300	1138000	0	3711600	0	3348800	0	1262700	0	17235000	4965600	0	0	0	9711200	0	145010000	1675000000	28462000	5512800	5503300	53063000	21559000	10732000
P15108	ATP-dependent molecular chaperone HSC82	HSC82	sp|P15108|HSC82_YEAST ATP-dependent molecular chaperone HSC82 OS=Saccharomyces cerevisiae (strain ATCC 204508 / S288c) GN=HSC82 PE=1 SV=4	1	42	50.2	80.899	705	0	323.31	34126000000	17633000	7706600	13790000	40397000	120730000	76775000	59885000	35659000	11304000	13499000	9849400	3021800	9394100	3841700	64148000	77265000	5989300000	15637000000	1635300000	4194800000	1173500000	254130000	870700000	367080000	475820000	518460000	716760000	182720000	207950000	270630000	95970000	105200000	115110000	118820000	231110000	79357000	177880000	37798000
P23638	Proteasome subunit alpha type-3	PRE9	sp|P23638|PSA3_YEAST Proteasome subunit alpha type-3 OS=Saccharomyces cerevisiae (strain ATCC 204508 / S288c) GN=PRE9 PE=1 SV=1	1	11	38.4	28.714	258	0	144.38	1772600000	0	0	0	6950000	0	32780000	93046000	0	0	13227000	0	0	0	0	716110000	771660	1335000	0	0	0	0	5969900	7345400	0	0	0	0	8755800	0	0	0	634760000	49170000	58349000	54078000	12830000	38483000	25783000
P40018	Small nuclear ribonucleoprotein-associated protein B	SMB1	sp|P40018|RSMB_YEAST Small nuclear ribonucleoprotein-associated protein B OS=Saccharomyces cerevisiae (strain ATCC 204508 / S288c) GN=SMB1 PE=1 SV=1	1	10	46.9	22.379	196	0	76.768	6832200000	6358600	1803400	7001200	9861500	10218000	93822000	4927500000	0	13423000	13149000	41830000	4865400	1144300	0	0	1999200	592080	656560	0	0	0	22939000	1513400	6358700	62840000	2965100	0	100620000	0	78434000	0	21803000	1066500000	221380000	20494000	60392000	10501000	7947400
Q12080	Ribosome biogenesis protein NOP53	NOP53	sp|Q12080|NOP53_YEAST Ribosome biogenesis protein NOP53 OS=Saccharomyces cerevisiae (strain ATCC 204508 / S288c) GN=NOP53 PE=1 SV=1	1	14	28.8	52.555	455	0	285.04	2056500000	0	0	0	0	0	0	0	0	2762800	13000000	0	0	0	0	1053700	0	0	0	0	0	0	0	18852000	1175200000	20071000	52913000	5972700	3908900	202060000	289000000	154960000	49092000	19629000	6462500	19626000	8467200	942020	3897200
P38833	Uncharacterized protein YHR127W	YHR127W	sp|P38833|YHS7_YEAST Uncharacterized protein YHR127W OS=Saccharomyces cerevisiae (strain ATCC 204508 / S288c) GN=YHR127W PE=1 SV=1	1	5	23	27.132	243	0	30.787	285440000	0	0	0	0	0	0	0	0	0	12875000	0	0	0	0	2439500	1804600	0	0	0	0	0	0	0	0	0	0	0	0	1206000	0	55339000	192050000	0	5233000	0	9898200	4097400	0
Q12460	Nucleolar protein 56	NOP56	sp|Q12460|NOP56_YEAST Nucleolar protein 56 OS=Saccharomyces cerevisiae (strain ATCC 204508 / S288c) GN=NOP56 PE=1 SV=1	1	21	53	56.863	504	0	149.42	2122000000	21131000	0	1954400	215370000	170960000	11983000	50822000	14711000	3230200	12841000	17895000	6667400	7333500	1459000	212360000	76607000	45121000	20667000	36287000	24974000	109680000	76091000	51587000	0	196040000	64023000	117080000	51939000	41338000	33461000	17010000	49008000	32524000	31919000	11082000	11962000	157010000	26949000
P42846	Protein KRI1	KRI1	sp|P42846|KRI1_YEAST Protein KRI1 OS=Saccharomyces cerevisiae (strain ATCC 204508 / S288c) GN=KRI1 PE=1 SV=1	1	10	16.4	68.653	591	0	94.059	832310000	0	0	0	0	2750600	0	22746000	10569000	18159000	12770000	0	6244500	0	0	105550000	82386000	34279000	16731000	31143000	54521000	23388000	94023000	33160000	10044000	26050000	14499000	52203000	24245000	17079000	19517000	10901000	3269600	14811000	12180000	17974000	0	4647100	16964000
P40553	Peroxiredoxin DOT5	DOT5	sp|P40553|DOT5_YEAST Peroxiredoxin DOT5 OS=Saccharomyces cerevisiae (strain ATCC 204508 / S288c) GN=DOT5 PE=1 SV=1	1	12	53.5	24.119	215	0	180.42	1509400000	0	0	0	0	2820900	0	0	0	0	12624000	0	0	0	0	0	0	0	0	0	0	2143000	0	0	0	0	0	2678900	0	0	0	207700000	897110000	11430000	18509000	124690000	54179000	108510000	48196000
P34760;Q04120	Peroxiredoxin TSA1	TSA1	sp|P34760|TSA1_YEAST Peroxiredoxin TSA1 OS=Saccharomyces cerevisiae (strain ATCC 204508 / S288c) GN=TSA1 PE=1 SV=3	2	11	50	21.589	196	0	262.49	7384600000	3739200	1049800	0	8779200	4016600	0	910250	0	4988700	12521000	633630	290750	86190000	0	7190400	2543400	34147000	50493000	16789000	10924000	4326700	14361000	29432000	27077000	1707500	4693500	9852800	15947000	6998600	7382300	7001700	7403700	5684400	14234000	250520000	4825500000	1789400000	70534000
P19097	Fatty acid synthase subunit alpha;Acyl carrier;3-oxoacyl-[acyl-carrier-protein] reductase;3-oxoacyl-[acyl-carrier-protein] synthase	FAS2	sp|P19097|FAS2_YEAST Fatty acid synthase subunit alpha OS=Saccharomyces cerevisiae (strain ATCC 204508 / S288c) GN=FAS2 PE=1 SV=2	1	53	33.9	206.94	1887	0	323.31	7232400000	0	8952200	4523900	36379000	59627000	12112000	8037200	15635000	24583000	12442000	14354000	874560	6210300	2741700	728620000	298170000	233920000	131570000	208790000	139240000	251690000	588990000	329380000	300350000	194900000	523210000	591750000	135650000	222060000	225170000	139980000	92118000	91854000	58385000	269160000	307730000	365170000	126560000
P23639	Proteasome subunit alpha type-2	PRE8	sp|P23639|PSA2_YEAST Proteasome subunit alpha type-2 OS=Saccharomyces cerevisiae (strain ATCC 204508 / S288c) GN=PRE8 PE=1 SV=1	1	11	42	27.162	250	0	295.19	2829600000	5395000	0	0	0	25325000	0	4821000	0	0	12247000	85306000	0	0	0	51789000	612480	3389900	0	0	0	0	2816800	0	6163200	674260	3160000	0	0	0	3438400	0	22485000	2113300000	355470000	23162000	34373000	41440000	24758000
P0CX40;P0CX39	40S ribosomal protein S8-B;40S ribosomal protein S8-A	RPS8B;RPS8A	sp|P0CX40|RS8B_YEAST 40S ribosomal protein S8-B OS=Saccharomyces cerevisiae (strain ATCC 204508 / S288c) GN=RPS8B PE=1 SV=1;sp|P0CX39|RS8A_YEAST 40S ribosomal protein S8-A OS=Saccharomyces cerevisiae (strain ATCC 204508 / S288c) GN=RPS8A PE=1 SV=1	2	6	39	22.489	200	0	323.31	17460000000	0	0	224270	0	11209000	17638000	36572000	15723000	10153000	11980000	87054000	11479000	0	0	0	2987300	1709500	184900	0	3637500	2274000	8933300	9050400	0	18331000	24144000	39805000	26726000	18701000	83142000	342540000	1726500000	4025500000	9237900000	221400000	589070000	292690000	67544000
P43535	Protein GCN20	GCN20	sp|P43535|GCN20_YEAST Protein GCN20 OS=Saccharomyces cerevisiae (strain ATCC 204508 / S288c) GN=GCN20 PE=1 SV=1	1	20	28.9	85.026	752	0	145.63	683980000	3197300	0	0	0	7967300	4049700	2723500	0	0	11827000	0	0	335550	0	0	0	318660000	194510000	4352300	696630	10749000	4934800	500780	7129700	2690800	0	0	2527300	2758900	48742000	0	1027500	46163000	0	3030700	0	0	1107900
P41805	60S ribosomal protein L10	RPL10	sp|P41805|RL10_YEAST 60S ribosomal protein L10 OS=Saccharomyces cerevisiae (strain ATCC 204508 / S288c) GN=RPL10 PE=1 SV=1	1	16	48.9	25.361	221	0	302.06	8034700000	804130	0	1954600	0	1200700	0	2646700	0	3820200	11733000	15974000	1600400000	5921800	1389600	1205700	9926700	3522500	16212000	2247000	509670	22613000	56301000	52017000	4160500	36640000	45559000	120110000	86855000	138810000	143220000	292140000	438610000	764040000	1196000000	1950800000	411560000	275160000	99561000
P32264	Glutamate 5-kinase	PRO1	sp|P32264|PROB_YEAST Glutamate 5-kinase OS=Saccharomyces cerevisiae (strain ATCC 204508 / S288c) GN=PRO1 PE=1 SV=2	1	6	15.7	47.162	428	0	21.164	173040000	0	0	0	0	0	0	0	0	0	11731000	0	0	0	264360	0	0	0	0	0	0	0	8008300	0	1716100	0	15832000	1336300	0	0	2204500	0	1553000	7434300	22200000	18122000	54922000	27713000	0
P04147	Polyadenylate-binding protein, cytoplasmic and nuclear	PAB1	sp|P04147|PABP_YEAST Polyadenylate-binding protein, cytoplasmic and nuclear OS=Saccharomyces cerevisiae (strain ATCC 204508 / S288c) GN=PAB1 PE=1 SV=4	1	32	54.9	64.343	577	0	323.31	14985000000	0	217460	0	9213100	80156000	24803000	72339000	23682000	9835000	11466000	0	0	2471300	0	2196300	5254100	4995700	736050	3183900	0	9377700000	199950000	350380000	137750000	3994000000	124400000	113420000	82672000	48456000	51593000	41784000	43435000	12794000	20034000	6607900	7846400	80256000	12649000
Q04493	Prefoldin subunit 5	GIM5	sp|Q04493|PFD5_YEAST Prefoldin subunit 5 OS=Saccharomyces cerevisiae (strain ATCC 204508 / S288c) GN=GIM5 PE=1 SV=1	1	4	27.6	18.356	163	0	47.827	387710000	10471000	9210900	0	0	7759800	2597800	2630700	4688400	6069100	11366000	12167000	12383000	7301000	21101000	16050000	3606300	12428000	2192800	0	14509000	9115700	9094200	7627200	0	9302800	7619700	10566000	1749000	13071000	3550400	13512000	2570800	0	2147300	13059000	119950000	1492700	0
P40565	U2 snRNP component IST3	IST3	sp|P40565|IST3_YEAST U2 snRNP component IST3 OS=Saccharomyces cerevisiae (strain ATCC 204508 / S288c) GN=IST3 PE=1 SV=1	1	2	16.2	17.098	148	0	39.625	899850000	13836000	29202000	31539000	19270000	29145000	22916000	9566800	17666000	8908900	10968000	12734000	9650000	12252000	17779000	29636000	50885000	10674000	12394000	10794000	33151000	9889700	17846000	15106000	19234000	45625000	54550000	9622400	16745000	10080000	0	40919000	15352000	12387000	30837000	38908000	34000000	42727000	34834000
P32178	Chorismate mutase	ARO7	sp|P32178|CHMU_YEAST Chorismate mutase OS=Saccharomyces cerevisiae (strain ATCC 204508 / S288c) GN=ARO7 PE=1 SV=1	1	4	13.3	29.747	256	0	5.0596	386440000	28556000	0	438800	1077500	0	4574500	0	797650	2571900	10769000	0	3607600	0	2102600	0	6091700	0	2287100	13299000	3119100	200550000	0	0	11889000	7809000	0	0	0	0	6898200	41170000	9047200	29785000	0	0	0	0	0
P14127;P02407	40S ribosomal protein S17-B;40S ribosomal protein S17-A	RPS17B;RPS17A	sp|P14127|RS17B_YEAST 40S ribosomal protein S17-B OS=Saccharomyces cerevisiae (strain ATCC 204508 / S288c) GN=RPS17B PE=1 SV=1;sp|P02407|RS17A_YEAST 40S ribosomal protein S17-A OS=Saccharomyces cerevisiae (strain ATCC 204508 / S288c) GN=RPS17A PE=1 SV=1	2	7	46.3	15.803	136	0	220.41	3078200000	50590000	1059500	1312600	3477100	1939100	1115100	0	2914200	875690	10621000	6174900	3365100	4985000	2887000	4855600	1759500	2497200	3252000	2594900	966680	3129000	3118100	3253600	3169100	0	2373200	0	0	3623200	52322000	4787000	5723500	5589000	6010200	36048000	260210000	2155400000	196930000
Q01939	26S protease regulatory subunit 8 homolog	RPT6	sp|Q01939|PRS8_YEAST 26S protease regulatory subunit 8 homolog OS=Saccharomyces cerevisiae (strain ATCC 204508 / S288c) GN=RPT6 PE=1 SV=4	1	6	15.1	45.271	405	0	12.814	206420000	4259300	1461400	8195000	4235500	0	0	0	1481200	0	10594000	6503100	7187700	1669300	579800	0	0	5457200	2687900	0	0	0	0	0	0	0	2355300	2441000	17924000	641120	6672500	35339000	18330000	18952000	12923000	11514000	3589800	7170500	9794800
Q03219	Uncharacterized protein YMR178W		sp|Q03219|YM44_YEAST Uncharacterized protein YMR178W OS=Saccharomyces cerevisiae (strain ATCC 204508 / S288c) GN=YMR178W PE=1 SV=1	1	11	44.9	31.144	274	0	250.97	584580000	1315500	0	0	0	0	0	0	0	3028800	10446000	6260100	4388200	0	581560	3325400	5892800	7127200	3029300	2571900	4157700	12412000	6461300	8329300	0	4867100	4382600	0	7918100	5736400	4905500	317000000	81462000	2816700	5520800	10646000	8127400	10817000	4724200
Q99207	Nucleolar complex protein 14	NOP14	sp|Q99207|NOP14_YEAST Nucleolar complex protein 14 OS=Saccharomyces cerevisiae (strain ATCC 204508 / S288c) GN=NOP14 PE=1 SV=1	1	18	22	94.301	810	0	96.943	454600000	0	0	0	0	0	8802700	8580700	0	0	10383000	0	0	0	0	396590	345540000	968020	0	967130	3823200	1329100	5835900	1577900	4907800	3660700	4998100	30758000	5180000	0	0	0	12318000	0	0	0	0	0	0
P47008	Phosphatidylinositol transfer protein SFH5	SFH5	sp|P47008|SFH5_YEAST Phosphatidylinositol transfer protein SFH5 OS=Saccharomyces cerevisiae (strain ATCC 204508 / S288c) GN=SFH5 PE=1 SV=1	1	4	12.6	34.388	294	0	5.2835	65550000	0	0	0	0	0	0	0	0	3939700	10189000	0	0	0	0	1481600	0	0	0	0	0	0	0	0	0	0	0	0	0	4149700	42238000	0	0	0	3551600	0	0	0	0
P50085	Prohibitin-2	PHB2	sp|P50085|PHB2_YEAST Prohibitin-2 OS=Saccharomyces cerevisiae (strain ATCC 204508 / S288c) GN=PHB2 PE=1 SV=2	1	6	17.4	34.406	310	0	14.654	264620000	0	0	921840	1372100	0	770810	1559200	0	4620600	9913700	0	0	1451600	3621100	0	331360	4986300	0	0	1983100	0	0	19929000	37940000	0	4959500	0	19977000	30538000	112610000	0	2358900	0	0	0	0	3648600	1121900
P53914	UPF0202 protein KRE33	KRE33	sp|P53914|NAT10_YEAST RNA cytidine acetyltransferase OS=Saccharomyces cerevisiae (strain ATCC 204508 / S288c) GN=NAT10 PE=1 SV=1	1	10	10.7	119.35	1056	0	88.641	287780000	0	0	2065300	572670	0	0	0	0	0	9629800	0	0	0	0	167320000	5473600	7363100	2716000	4210400	6009600	6029300	15072000	5143000	2170600	9071400	0	2325600	1278500	0	2952600	6850700	12773000	0	2221400	11127000	569770	3133400	0
Q04225	Ribosome assembly protein RRB1	RRB1	sp|Q04225|RRB1_YEAST Ribosome assembly protein RRB1 OS=Saccharomyces cerevisiae (strain ATCC 204508 / S288c) GN=RRB1 PE=1 SV=1	1	14	26	57.261	511	0	323.31	1201000000	2529600	0	0	0	2524800	5428700	4877900	11423000	0	8993100	0	2364200	0	0	4410300	977950	9577300	0	0	2565000	130330000	535860000	86638000	10401000	248970000	0	71680000	6604600	0	4429600	893340	34288000	0	0	5397800	0	9654900	0
P14682	Ubiquitin-conjugating enzyme E2-34 kDa	CDC34	sp|P14682|UBC3_YEAST Ubiquitin-conjugating enzyme E2-34 kDa OS=Saccharomyces cerevisiae (strain ATCC 204508 / S288c) GN=CDC34 PE=1 SV=1	1	3	12.9	34.064	295	0	6.4442	51050000	0	0	0	0	0	0	0	6787300	0	8836700	0	0	0	0	0	0	0	0	1351000	0	0	0	0	0	2089900	23451000	0	0	0	1254300	0	0	0	0	6084800	1194800	0	0
P0CX30;P0CX29	40S ribosomal protein S23-B;40S ribosomal protein S23-A	RPS23B;RPS23A	sp|P0CX30|RS23B_YEAST 40S ribosomal protein S23-B OS=Saccharomyces cerevisiae (strain ATCC 204508 / S288c) GN=RPS23B PE=1 SV=1;sp|P0CX29|RS23A_YEAST 40S ribosomal protein S23-A OS=Saccharomyces cerevisiae (strain ATCC 204508 / S288c) GN=RPS23A PE=1 SV=1	2	6	31.7	16.038	145	0	25.903	9844000000	91791000	4347200	17016000	0	1041000	0	7640500	0	0	8775900	0	0	2616700	10978000	706910	2822600	0	0	1007400	0	3301900	4829700	3671600	12494000	4756600	8777000	47796000	10473000	49894000	50651000	66428000	70639000	142940000	106240000	250970000	148030000	8234200000	79645000
P0CX56;P0CX55	40S ribosomal protein S18-B;40S ribosomal protein S18-A	RPS18B;RPS18A	sp|P0CX56|RS18B_YEAST 40S ribosomal protein S18-B OS=Saccharomyces cerevisiae (strain ATCC 204508 / S288c) GN=RPS18B PE=1 SV=1;sp|P0CX55|RS18A_YEAST 40S ribosomal protein S18-A OS=Saccharomyces cerevisiae (strain ATCC 204508 / S288c) GN=RPS18A PE=1 SV=1	2	10	64.4	17.037	146	0	323.31	19016000000	990330000	23279000	6564100	13381000	2303500	17080000	34272000	2001400	3201000	8426300	9904100	2368100	9617000	2509600	0	0	0	0	0	1087400	5340900	12401000	1269900	1465400	8737800	4843300	13838000	0	11343000	1940000	36250000	10581000	19749000	8215300	154240000	332330000	15449000000	345500000
P51401	60S ribosomal protein L9-B	RPL9B	sp|P51401|RL9B_YEAST 60S ribosomal protein L9-B OS=Saccharomyces cerevisiae (strain ATCC 204508 / S288c) GN=RPL9B PE=1 SV=1	1	11	53.4	21.657	191	0	323.31	14516000000	0	0	0	4153200	0	0	0	3242900	0	8397500	1420000	4097600	0	0	9073000	532430	0	0	2070300	0	0	3686200	0	0	9779700	22032000	51151000	11025000	26606000	14634000	47884000	64343000	409270000	864370000	12447000000	104710000	208930000	62924000
Q05016	Uncharacterized oxidoreductase YMR226C		sp|Q05016|YM71_YEAST NADP-dependent 3-hydroxy acid dehydrogenase OS=Saccharomyces cerevisiae (strain ATCC 204508 / S288c) GN=YMR226C PE=1 SV=1	1	7	31.8	29.158	267	0	215	1271100000	0	0	0	0	0	0	0	0	0	7964700	0	0	0	0	0	0	0	0	0	0	0	0	3061100	0	0	0	0	0	0	0	21142000	1147700000	14494000	3651600	0	2247700	7042000	0
P06738	Glycogen phosphorylase	GPH1	sp|P06738|PHSG_YEAST Glycogen phosphorylase OS=Saccharomyces cerevisiae (strain ATCC 204508 / S288c) GN=GPH1 PE=1 SV=4	1	42	50.2	103.27	902	0	323.31	14122000000	1310300	1648600	2390900	27793000	1828000	34474000	0	5213100	53042000	7875400	2084700	0	3013700	14045000	47378000	12155000000	284900000	251780000	167350000	58404000	187910000	96397000	44335000	142930000	33807000	10298000	45489000	45821000	12238000	19849000	23074000	50953000	21732000	10901000	112590000	8156000	96091000	6254800
P19882	Heat shock protein 60, mitochondrial	HSP60	sp|P19882|HSP60_YEAST Heat shock protein 60, mitochondrial OS=Saccharomyces cerevisiae (strain ATCC 204508 / S288c) GN=HSP60 PE=1 SV=1	1	23	42.5	60.751	572	0	323.31	1351600000	3133600	1561600	1517700	3860700	1175700	29538000	11427000	9004800	10967000	7835700	2331300	4244700	1999000	2607100	2002700	5453500	7131800	646370	1307500	3133100	7076600	929840000	9875500	6695000	8121400	19465000	173990000	26421000	17628000	18358000	9221100	7009500	0	0	0	3555700	0	0
P04456	60S ribosomal protein L25	RPL25	sp|P04456|RL25_YEAST 60S ribosomal protein L25 OS=Saccharomyces cerevisiae (strain ATCC 204508 / S288c) GN=RPL25 PE=1 SV=4	1	7	47.9	15.757	142	0	242.45	5339200000	49960000	0	3373500	0	3056900	592860	5245700	4342700	5658100	7633400	3590600	423830	4357600	3354400	0	680670	0	1818400	0	1661700	0	0	0	0	0	1673800	0	0	0	0	0	0	11499000	11504000	117130000	406590000	3826800000	93618000
P35691	Translationally-controlled tumor protein homolog	TMA19	sp|P35691|TCTP_YEAST Translationally-controlled tumor protein homolog OS=Saccharomyces cerevisiae (strain ATCC 204508 / S288c) GN=TMA19 PE=1 SV=1	1	9	41.9	18.741	167	0	136.46	2051000000	0	1154300	0	0	2070700	606520	0	0	0	7442800	1588600	0	147100000	0	0	0	650410	0	2669800	0	908860	0	5577100	2194500	1860900	0	3313200	0	1145200	10567000	3823400	38484000	5555400	11684000	399470000	938150000	266600000	25548000
P32610	V-type proton ATPase subunit D	VMA8	sp|P32610|VATD_YEAST V-type proton ATPase subunit D OS=Saccharomyces cerevisiae (strain ATCC 204508 / S288c) GN=VMA8 PE=1 SV=1	1	5	14.1	29.194	256	0	22.619	328380000	16134000	0	1629200	6714800	0	0	1717300	0	5418400	7439600	9513400	0	0	0	0	0	2463500	1678500	1946500	0	13851000	0	10160000	7694600	4989500	0	4765500	5169000	0	6053300	155320000	13888000	10310000	3005400	6860300	6133500	10482000	1753200
P48164	40S ribosomal protein S7-B	RPS7B	sp|P48164|RS7B_YEAST 40S ribosomal protein S7-B OS=Saccharomyces cerevisiae (strain ATCC 204508 / S288c) GN=RPS7B PE=1 SV=1	1	8	50	21.634	190	0	187.55	8117700000	3081500	2458000	882100	0	0	0	7199600	4698000	8612700	7408400	1692200	1462200	6614600	649530	0	0	0	0	3999600	0	0	3913800	3210000	1732000	2856000	1849100	0	0	2762600	4460600	80468000	22308000	77167000	210330000	6307600000	472790000	553800000	81146000
P32328	Serine/threonine-protein kinase DBF20	DBF20	sp|P32328|DBF20_YEAST Serine/threonine-protein kinase DBF20 OS=Saccharomyces cerevisiae (strain ATCC 204508 / S288c) GN=DBF20 PE=1 SV=2	1	10	16.3	65.879	564	0	76.116	490650000	6461400	0	3321600	5145400	0	0	5161000	4330400	3587500	7322900	0	5019700	0	4133400	3733400	312080	0	0	2234900	0	0	308880000	46334000	21900000	43891000	0	0	0	0	4201600	3237700	2840000	0	6200300	0	0	0	0
P31116	Homoserine dehydrogenase	HOM6	sp|P31116|DHOM_YEAST Homoserine dehydrogenase OS=Saccharomyces cerevisiae (strain ATCC 204508 / S288c) GN=HOM6 PE=1 SV=1	1	6	17.8	38.502	359	0	33.609	191040000	0	0	0	0	0	0	0	0	0	7289200	0	0	0	0	1430500	2704800	0	9839900	0	0	5921600	0	0	3777200	7117600	0	139500000	10117000	1368900	0	0	0	1541600	0	428380	0	0	0
P02294;P02293	Histone H2B.2;Histone H2B.1	HTB2;HTB1	sp|P02294|H2B2_YEAST Histone H2B.2 OS=Saccharomyces cerevisiae (strain ATCC 204508 / S288c) GN=HTB2 PE=1 SV=2;sp|P02293|H2B1_YEAST Histone H2B.1 OS=Saccharomyces cerevisiae (strain ATCC 204508 / S288c) GN=HTB1 PE=1 SV=2	2	7	45.8	14.237	131	0	215.36	25116000000	15024000000	81921000	65165000	698710	1435100	0	16091000	1134800	0	7284000	4219800	22047000	11247000	977000	1190400	0	0	0	0	0	0	2856400	16463000	7909900	0	0	3734400	2861100	12779000	2709900	12366000	16712000	33937000	94722000	100720000	235290000	9169700000	46513000
P34167	Eukaryotic translation initiation factor 4B	TIF3	sp|P34167|IF4B_YEAST Eukaryotic translation initiation factor 4B OS=Saccharomyces cerevisiae (strain ATCC 204508 / S288c) GN=TIF3 PE=1 SV=1	1	9	30	48.521	436	0	26.411	1151400000	844670	359640	409510	0	1081500	3069900	5618700	6309000	10630000	7156700	667550	191390	764200	0	286960	1696600	2794300	1888000	3834700	0	12078000	4347600	10823000	2773100	76399000	69312000	191880000	66807000	153840000	92626000	61682000	86183000	56070000	24528000	61680000	22000000	53206000	23419000
P33416	Heat shock protein 78, mitochondrial	HSP78	sp|P33416|HSP78_YEAST Heat shock protein 78, mitochondrial OS=Saccharomyces cerevisiae (strain ATCC 204508 / S288c) GN=HSP78 PE=1 SV=2	1	41	52.3	91.335	811	0	323.31	7503200000	0	1064900	1438600	350290	268660	0	27971000	1792900	1497700	7001500	3108700	4921000	1125000	0	2575400	3044000	26020000	61567000	5765400000	445260000	86266000	175510000	91056000	58719000	49738000	49206000	130220000	155640000	68234000	52340000	41800000	27412000	32143000	23492000	27763000	36705000	27147000	1862700
P05317	60S acidic ribosomal protein P0	RPP0	sp|P05317|RLA0_YEAST 60S acidic ribosomal protein P0 OS=Saccharomyces cerevisiae (strain ATCC 204508 / S288c) GN=RPP0 PE=1 SV=2	1	11	36.2	33.717	312	0	323.31	20998000000	5144500	2000900	2017900	0	2511100	4315600	11454000	18831000	155280000	6766300	5379400	3086600	20962000	2370800	0	880590	837640	0	0	850580	1215300	979140	1254500	0	1963200	6352700	23333000	8233600	109940000	16285000000	1755300000	1546600000	48664000	73010000	199610000	187100000	118300000	39907000
P53549	26S protease subunit RPT4	RPT4	sp|P53549|PRS10_YEAST 26S protease subunit RPT4 OS=Saccharomyces cerevisiae (strain ATCC 204508 / S288c) GN=RPT4 PE=1 SV=4	1	20	43.7	49.408	437	0	323.31	2227500000	5360700	1590900	461300	3243500	0	1176900	2940300	6323500	11933000	6759900	0	0	0	4342900	0	3783600	5873600	5255500	782060	3781300	18147000	2047800	1729900	113860000	1128000000	91864000	166690000	73717000	37068000	67898000	154140000	119810000	29713000	20877000	48677000	18485000	26489000	8249000
P25368	Ribosomal RNA-processing protein 7	RRP7	sp|P25368|RRP7_YEAST Ribosomal RNA-processing protein 7 OS=Saccharomyces cerevisiae (strain ATCC 204508 / S288c) GN=RRP7 PE=1 SV=1	1	9	29	34.47	297	0	199.78	1728100000	3185800	0	0	1760200	0	0	1280900	18183000	0	6621400	5692800	6754600	4339200	8754300	0	0	0	0	0	0	0	0	0	0	6040200	18865000	1523000000	89949000	1442900	0	7317500	1901700	0	23021000	0	0	0	0
P21374	Pre-mRNA-splicing factor ISY1	ISY1	sp|P21374|ISY1_YEAST Pre-mRNA-splicing factor ISY1 OS=Saccharomyces cerevisiae (strain ATCC 204508 / S288c) GN=ISY1 PE=1 SV=2	1	4	22.6	28.023	235	0	4.9658	51660000	0	0	0	0	0	0	0	0	0	6498100	0	2857200	0	514230	0	0	0	0	0	0	0	0	0	0	0	0	0	0	0	0	6463800	35326000	0	0	0	0	0	0
Q12331	FAS1 domain-containing protein YDR262W		sp|Q12331|YFAS1_YEAST FAS1 domain-containing protein YDR262W OS=Saccharomyces cerevisiae (strain ATCC 204508 / S288c) GN=YDR262W PE=1 SV=1	1	7	31.6	30.633	272	0	87.488	197430000	0	0	0	0	0	0	2279100	0	0	6458800	0	0	0	0	0	0	0	0	1455300	0	5572400	0	0	0	0	0	0	0	0	0	143760000	35391000	1757700	756450	0	0	0	0
P32453	Protein ATP11, mitochondrial	ATP11	sp|P32453|ATP11_YEAST Protein ATP11, mitochondrial OS=Saccharomyces cerevisiae (strain ATCC 204508 / S288c) GN=ATP11 PE=1 SV=1	1	11	32.1	36.851	318	0	45.162	1790300000	3851300	0	1811700	0	0	4818300	1888000	3657200	57578000	6177600	17628000	5568200	3071100	3863700	5625300	0	1618800	2302100	0	5358100	1547400	3405100	0	305480000	0	0	472820000	407610000	115020000	204640000	6929700	4789900	36020000	63454000	20271000	5576200	7075800	5659400
P53207	U1 small nuclear ribonucleoprotein component SNU71	SNU71	sp|P53207|SNU71_YEAST U1 small nuclear ribonucleoprotein component SNU71 OS=Saccharomyces cerevisiae (strain ATCC 204508 / S288c) GN=SNU71 PE=1 SV=1	1	4	7.1	71.382	620	0	14.561	70159000	0	0	0	4236200	2245900	0	0	0	0	6154800	0	0	0	0	0	0	16030000	0	8967900	23588000	0	0	1904700	0	0	0	0	0	0	0	0	7032000	0	0	0	0	0	0
P15646	rRNA 2-O-methyltransferase fibrillarin	NOP1	sp|P15646|FBRL_YEAST rRNA 2-O-methyltransferase fibrillarin OS=Saccharomyces cerevisiae (strain ATCC 204508 / S288c) GN=NOP1 PE=1 SV=1	1	19	41.3	34.465	327	0	301.56	35029000000	0	2207000	971220	0	4361100	798510	10559000	420680000	23869000	6055400	1916100	704630	1583000	0	0	0	2320300	1494200	2999500	738250	8817800	2878300	3516900	4884500	11060000	2069100000	26477000000	3242800000	217310000	147030000	72608000	173160000	592290000	233830000	278370000	148530000	176090000	296190000
P36049	rRNA-processing protein EBP2	EBP2	sp|P36049|EBP2_YEAST rRNA-processing protein EBP2 OS=Saccharomyces cerevisiae (strain ATCC 204508 / S288c) GN=EBP2 PE=1 SV=1	1	20	39.3	49.734	427	0	323.31	4019000000	11406000	11435000	1586400	0	4285200	0	1592000	1869600	0	5932300	2653200	7212700	5414100	9791200	0	0	8061800	1232400	6990000	2220100	0	10704000	3430800000	229240000	46557000	25287000	62117000	75857000	11614000	13669000	0	5112900	8468900	2817200	3499500	1467200	9673000	411280
P36060	NADH-cytochrome b5 reductase 2;NADH-cytochrome b5 reductase p34 form;NADH-cytochrome b5 reductase p32 form	MCR1	sp|P36060|MCR1_YEAST NADH-cytochrome b5 reductase 2 OS=Saccharomyces cerevisiae (strain ATCC 204508 / S288c) GN=MCR1 PE=1 SV=1	1	5	14.2	34.137	302	0	11.078	518960000	0	0	0	0	0	0	0	0	0	5911400	15818000	0	0	0	0	0	0	0	0	0	1128800	0	0	0	0	0	6877900	4070900	33925000	120410000	43046000	10630000	80452000	30512000	17341000	14236000	118680000	5146600
P54003	Protein SUR7	SUR7	sp|P54003|SUR7_YEAST Protein SUR7 OS=Saccharomyces cerevisiae (strain ATCC 204508 / S288c) GN=SUR7 PE=1 SV=1	1	5	12.6	33.829	302	0	49.99	713770000	0	1555400	0	0	2299400	0	0	860920	27328000	5908800	0	0	0	0	15132000	0	0	0	1062500	0	1633500	0	0	5932900	1730100	6811000	13446000	24423000	45913000	516930000	7259000	17839000	10487000	7221500	0	0	0	0
P00127	Cytochrome b-c1 complex subunit 6	QCR6	sp|P00127|QCR6_YEAST Cytochrome b-c1 complex subunit 6 OS=Saccharomyces cerevisiae (strain ATCC 204508 / S288c) GN=QCR6 PE=1 SV=2	1	1	14.3	17.257	147	0	84.2	142460000	0	0	0	0	0	0	0	0	2672800	5815500	0	4053100	0	0	0	0	0	0	0	0	0	0	0	27215000	10008000	10174000	0	10781000	0	2475000	3523200	4618000	0	0	45608000	7252000	0	5050500
P53297	PAB1-binding protein 1	PBP1	sp|P53297|PBP1_YEAST PAB1-binding protein 1 OS=Saccharomyces cerevisiae (strain ATCC 204508 / S288c) GN=PBP1 PE=1 SV=1	1	3	5.7	78.78	722	0	18.736	73748000	0	0	0	21130000	0	0	0	610410	0	5752200	0	0	0	0	0	0	0	0	0	2881600	0	0	0	0	852790	907600	1281400	736550	0	0	39595000	0	0	0	0	0	0	0
P53313	Protein SDA1	SDA1	sp|P53313|SDA1_YEAST Protein SDA1 OS=Saccharomyces cerevisiae (strain ATCC 204508 / S288c) GN=SDA1 PE=1 SV=1	1	17	22.3	86.617	767	0	138.22	779190000	0	0	0	573710000	5350400	1506500	15961000	0	550240	5746200	0	0	0	0	1858600	2381500	19567000	37804000	19429000	8751100	10893000	6596400	4228900	8488600	7662200	1054500	17691000	1310900	0	3821300	0	7979000	0	0	716410	0	4372900	10100000
Q12692	Histone H2A.Z	HTZ1	sp|Q12692|H2AZ_YEAST Histone H2A.Z OS=Saccharomyces cerevisiae (strain ATCC 204508 / S288c) GN=HTZ1 PE=1 SV=3	1	4	29.9	14.282	134	0	66.102	551360000	141850000	22260000	11370000	8748100	7984100	0	7686000	8276300	7654000	5723600	6675800	5599400	3214500	6141400	4348900	3284000	5648700	3342600	3915000	3862200	4852500	3497000	3397000	0	4139300	3411700	3636300	4377600	6459700	0	3557300	3368300	2708500	2729300	5567600	5734100	211710000	6168700
P53168	DASH complex subunit DUO1	DUO1	sp|P53168|DUO1_YEAST DASH complex subunit DUO1 OS=Saccharomyces cerevisiae (strain ATCC 204508 / S288c) GN=DUO1 PE=1 SV=1	1	2	15.4	27.473	247	0	6.6819	31367000	0	0	0	0	0	0	0	0	0	5638500	0	1171600	0	0	0	0	0	0	0	0	0	0	0	0	0	0	0	0	0	0	20099000	0	0	0	4458100	0	0	0
Q12493	Central kinetochore subunit NKP1	NKP1	sp|Q12493|NKP1_YEAST Central kinetochore subunit NKP1 OS=Saccharomyces cerevisiae (strain ATCC 204508 / S288c) GN=NKP1 PE=1 SV=2	1	9	38.7	26.976	238	0	170.21	452190000	0	0	0	0	378260	0	0	355890	0	5594700	33149000	0	0	0	1208200	0	424900	0	2830900	2844900	0	0	0	0	8835600	5009300	15542000	0	0	0	0	0	178280000	189830000	0	3934300	0	3975800
P28834	Isocitrate dehydrogenase [NAD] subunit 1, mitochondrial	IDH1	sp|P28834|IDH1_YEAST Isocitrate dehydrogenase [NAD] subunit 1, mitochondrial OS=Saccharomyces cerevisiae (strain ATCC 204508 / S288c) GN=IDH1 PE=1 SV=2	1	15	49.7	39.324	360	0	323.31	3319200000	0	0	0	317970	0	0	1542900	210670000	0	5491300	2528200	0	0	3205300	3777200	1765700	0	397760	3718500	1845200	4746300	0	6023800	0	1781400	467800000	2470600000	9050300	8068500	7503000	5908300	70574000	1870200	6243100	2393700	0	17715000	1051200
P33324	CRAL-TRIO domain-containing protein YKL091C	YKL091C	sp|P33324|YKJ1_YEAST CRAL-TRIO domain-containing protein YKL091C OS=Saccharomyces cerevisiae (strain ATCC 204508 / S288c) GN=YKL091C PE=1 SV=2	1	9	26.5	36.073	310	0	31.564	263880000	1701400	2462900	870190	0	3351600	5267500	4074400	9480200	6820500	5397100	4136200	0	2568700	0	0	8927900	0	0	0	5763000	0	0	0	0	0	0	0	0	196350000	6711300	0	0	0	0	0	0	0	0
Q06205	FK506-binding protein 4	FPR4	sp|Q06205|FKBP4_YEAST FK506-binding protein 4 OS=Saccharomyces cerevisiae (strain ATCC 204508 / S288c) GN=FPR4 PE=1 SV=1	1	14	35.5	43.903	392	0	323.31	26028000000	0	0	7276300	0	0	11176000	3098900	3991000	0	5389400	0	0	2361800	6215600	54816000	17741000	33496000	9205600	45897000	13663000	55966000	110840000	299890000	904610000	23249000000	133550000	225800000	46744000	74355000	21725000	283670000	85027000	61778000	140150000	47261000	13327000	11927000	24038000
P50947	Transcriptional regulatory protein PHO23	PHO23	sp|P50947|PHO23_YEAST Transcriptional regulatory protein PHO23 OS=Saccharomyces cerevisiae (strain ATCC 204508 / S288c) GN=PHO23 PE=1 SV=1	1	8	28.5	37.024	330	0	167.65	597370000	0	0	0	0	0	6928900	0	7877100	5101700	5015800	3549900	3908800	4046000	0	0	3729800	0	1576900	0	3056200	0	6164100	1078900	5328200	9606000	91311000	275210000	2461900	7020800	2687100	22220000	23280000	19771000	19080000	34201000	0	0	27964000
P05626	ATP synthase subunit 4, mitochondrial	ATP4	sp|P05626|ATPF_YEAST ATP synthase subunit 4, mitochondrial OS=Saccharomyces cerevisiae (strain ATCC 204508 / S288c) GN=ATP4 PE=1 SV=2	1	6	27.5	26.925	244	0	161.09	364840000	6704900	3298900	6290700	4758200	0	0	5119200	2103300	2244900	4993300	0	7035700	1733300	0	0	0	3664400	0	0	0	9909400	0	6424800	0	0	0	7128700	20351000	6978500	10029000	12469000	8560900	2590100	5763000	176810000	2945100	28168000	9144700
P0C2H7;P0C2H6	60S ribosomal protein L27-B;60S ribosomal protein L27-A	RPL27B;RPL27A	sp|P0C2H7|RL27B_YEAST 60S ribosomal protein L27-B OS=Saccharomyces cerevisiae (strain ATCC 204508 / S288c) GN=RPL27B PE=1 SV=1;sp|P0C2H6|RL27A_YEAST 60S ribosomal protein L27-A OS=Saccharomyces cerevisiae (strain ATCC 204508 / S288c) GN=RPL27A PE=1 SV=1	2	7	50	15.505	136	0	254.02	7314600000	111520000	8177000	0	2502800	2080500	7089400	7045900	4616000	7008400	4918900	2631100	756570	4654200	473910	6218100	10827000	558510	0	0	0	0	0	1304200	0	1483400	5585200	5583200	10089000	17674000	14525000	17195000	33299000	76106000	97900000	529220000	474670000	5579500000	136260000
P38719	ATP-dependent RNA helicase DBP8	DBP8	sp|P38719|DBP8_YEAST ATP-dependent RNA helicase DBP8 OS=Saccharomyces cerevisiae (strain ATCC 204508 / S288c) GN=DBP8 PE=1 SV=1	1	10	23.9	47.878	431	0	35.303	665960000	0	0	385630	14758000	5194100	428640000	0	0	375420	4822200	585450	0	0	0	13361000	8766900	2965300	26467000	16568000	7819400	11574000	0	0	0	5526500	7448000	51167000	11346000	13672000	1828100	0	1135200	8059600	1176500	2967700	7908900	4956100	768120
P38708	Putative proline--tRNA ligase YHR020W	YHR020W	sp|P38708|YHI0_YEAST Putative proline--tRNA ligase YHR020W OS=Saccharomyces cerevisiae (strain ATCC 204508 / S288c) GN=YHR020W PE=1 SV=1	1	23	38.2	77.385	688	0	323.31	2361000000	0	581170	0	0	0	1336400	0	529810	0	4755100	0	0	0	0	15154000	6287900	15533000	16040000	208020000	1263400000	66253000	57991000	100780000	16178000	34101000	7528000	39770000	22400000	101140000	104440000	40209000	56775000	13230000	22864000	50217000	10941000	28808000	11283000
P18759	Vesicular-fusion protein SEC18	SEC18	sp|P18759|SEC18_YEAST Vesicular-fusion protein SEC18 OS=Saccharomyces cerevisiae (strain ATCC 204508 / S288c) GN=SEC18 PE=1 SV=2	1	30	42.3	84.055	758	0	323.31	2987200000	5123400	5470900	3258100	0	4338800	7238400	1873000	6375900	2566000	4712700	0	5582100	0	0	0	4186300	42605000	699150000	1343100000	312340000	12087000	15245000	25528000	67267000	42006000	66415000	13756000	20360000	54020000	29324000	35393000	57584000	9291900	22990000	19507000	6542900	21021000	6625300
P41920	Ran-specific GTPase-activating protein 1	YRB1	sp|P41920|YRB1_YEAST Ran-specific GTPase-activating protein 1 OS=Saccharomyces cerevisiae (strain ATCC 204508 / S288c) GN=YRB1 PE=1 SV=1	1	6	34.8	22.953	201	0	85.348	441700000	0	0	0	0	0	0	0	0	0	4566600	0	0	0	0	0	0	0	0	0	0	0	14408000	0	0	0	0	0	0	0	0	246530000	53938000	0	38938000	0	3501300	57698000	19868000
Q08686	Thiosulfate sulfurtransferase TUM1	TUM1	sp|Q08686|THTR_YEAST Thiosulfate sulfurtransferase TUM1 OS=Saccharomyces cerevisiae (strain ATCC 204508 / S288c) GN=TUM1 PE=1 SV=1	1	20	70.1	34.219	304	0	323.31	5485800000	0	0	0	0	0	803760	318620000	169930000	194500000	4483000	3563400	0	0	0	266830000	133710000	0	223140000	204540000	256120000	138970000	0	10710000	93867000	8853200	0	1415500	6862000	1182400000	660500000	12962000	150700000	157440000	153910000	200770000	184790000	249530000	158580000
Q12207	Non-classical export protein 2	NCE102	sp|Q12207|NCE2_YEAST Non-classical export protein 2 OS=Saccharomyces cerevisiae (strain ATCC 204508 / S288c) GN=NCE102 PE=1 SV=1	1	3	13.3	18.967	173	0	30.195	5696300000	119420000	411380000	3501500	120240000	1165400	4987800	3058900	4508900	3274600	4356200	2010100	5072300	17275000	2991000	145940000	99461000	6033200	10580000	9363800	8719500	0	0	2515200	4827600	11454000	0	0	5081700	5104100	6582600	3337000	29929000	34414000	17146000	209950000	66080000	4072700000	228210000
Q06385	Vacuolar protein sorting-associated protein 74	VPS74	sp|Q06385|VPS74_YEAST Vacuolar protein sorting-associated protein 74 OS=Saccharomyces cerevisiae (strain ATCC 204508 / S288c) GN=VPS74 PE=1 SV=1	1	8	28.4	39.286	345	0	91.986	595950000	0	3393300	0	0	0	0	463400	0	4317100	4308800	0	0	0	0	0	0	0	0	0	0	0	0	0	9595000	0	0	209800000	267390000	21514000	38552000	2493300	12847000	0	0	15250000	0	0	6023000
P38810	SED5-binding protein 3	SFB3	sp|P38810|SFB3_YEAST SED5-binding protein 3 OS=Saccharomyces cerevisiae (strain ATCC 204508 / S288c) GN=SFB3 PE=1 SV=1	1	13	15.6	103.95	929	0	83.714	300960000	0	628520	210550	1597500	641840	146360	0	3166100	1303900	4252000	0	684930	0	1061700	0	121300000	81961000	24160000	27625000	6412900	4851600	1178300	4096200	5376100	632300	0	3560200	1252200	0	1209700	0	3644200	0	0	0	0	0	0
P20448	ATP-dependent RNA helicase HCA4	HCA4	sp|P20448|DBP4_YEAST ATP-dependent RNA helicase HCA4 OS=Saccharomyces cerevisiae (strain ATCC 204508 / S288c) GN=HCA4 PE=1 SV=2	1	6	8.7	87.192	770	0	16.545	375680000	0	0	0	21297000	0	0	3761300	5301300	0	4235400	442490	392680	0	0	0	3136600	2372500	4780300	3789200	785410	7898300	37105000	39382000	0	18654000	20253000	14643000	13517000	21826000	87641000	15465000	31490000	7236500	1146600	5025500	0	2848400	0
P00549	Pyruvate kinase 1	CDC19	sp|P00549|KPYK1_YEAST Pyruvate kinase 1 OS=Saccharomyces cerevisiae (strain ATCC 204508 / S288c) GN=CDC19 PE=1 SV=2	1	28	47.2	54.544	500	0	323.31	15205000000	1981000	7018600	3477300	24017000	55999000	11725000	11615000	33474000	17241000	4179400	1718400	44339000	7589500	3648100	166670000	100530000	107420000	65733000	116420000	90639000	185940000	258150000	693590000	9746800000	278210000	176140000	486810000	181070000	404560000	220480000	118300000	70382000	135480000	70569000	106820000	158370000	365970000	148410000
P53323	EKC/KEOPS complex subunit BUD32	BUD32	sp|P53323|BUD32_YEAST EKC/KEOPS complex subunit BUD32 OS=Saccharomyces cerevisiae (strain ATCC 204508 / S288c) GN=BUD32 PE=1 SV=1	1	4	10.7	29.936	261	0	49.209	321580000	0	0	0	0	0	0	0	0	0	4167200	0	0	0	0	0	0	0	0	8307600	4638000	0	0	0	0	0	0	0	0	0	0	57191000	161030000	0	0	2875700	3107400	34324000	4444800
P32342	Signal recognition particle subunit SRP21	SRP21	sp|P32342|SRP21_YEAST Signal recognition particle subunit SRP21 OS=Saccharomyces cerevisiae (strain ATCC 204508 / S288c) GN=SRP21 PE=1 SV=3	1	2	11.4	18.425	167	0	13.358	143440000	0	0	278720	0	0	0	0	3363900	776610	4122900	2700000	0	377460	0	0	5381000	2182900	0	0	228770	3243600	0	0	31972000	0	3656100	0	0	0	0	0	0	4819100	12834000	58234000	0	5889500	2595500
Q12487	54S ribosomal protein L23, mitochondrial	MRPL23	sp|Q12487|RM23_YEAST 54S ribosomal protein L23, mitochondrial OS=Saccharomyces cerevisiae (strain ATCC 204508 / S288c) GN=MRPL23 PE=1 SV=1	1	3	16.6	18.463	163	0	14.418	232200000	0	807390	0	13757000	0	1032000	0	1296300	4133500	4040400	6249400	0	0	0	0	0	0	353630	0	1680200	0	0	0	11336000	3635100	938250	0	0	0	0	0	66885000	36380000	0	4200500	713430	73908000	0
Q02486	ARS-binding factor 2, mitochondrial	ABF2	sp|Q02486|ABF2_YEAST ARS-binding factor 2, mitochondrial OS=Saccharomyces cerevisiae (strain ATCC 204508 / S288c) GN=ABF2 PE=1 SV=1	1	9	42.6	21.561	183	0	75.928	524820000	10761000	15726000	0	0	4424700	4952700	0	1245700	751720	4002100	0	0	769640	709450	0	0	0	0	0	1181800	6444900	0	250260	5563700	0	2393300	25864000	44822000	695330	0	8837300	6889500	0	0	0	318900000	43309000	14315000
Q03532	ATP-dependent RNA helicase HAS1	HAS1	sp|Q03532|HAS1_YEAST ATP-dependent RNA helicase HAS1 OS=Saccharomyces cerevisiae (strain ATCC 204508 / S288c) GN=HAS1 PE=1 SV=1	1	17	32.5	56.717	505	0	323.31	1292500000	1543600	1464900	0	0	2949200	0	1992200	959210	10188000	3998100	0	0	0	1686600	0	2377700	1928000	2309100	1124000	3268900	5917600	17818000	13096000	765170000	166140000	24349000	23888000	2491100	9327600	23543000	40597000	6970800	13215000	1270600	4075300	4856300	121720000	9294200
P06174	Uroporphyrinogen-III synthase	HEM4	sp|P06174|HEM4_YEAST Uroporphyrinogen-III synthase OS=Saccharomyces cerevisiae (strain ATCC 204508 / S288c) GN=HEM4 PE=1 SV=2	1	3	10.9	30.911	275	0	4.4552	63621000	0	0	0	0	0	0	0	0	3475500	3876100	0	0	1449800	0	2234200	1358700	0	941940	0	1336700	1841500	0	4766100	7288400	0	0	0	0	0	0	11356000	4742400	0	1313100	7956500	2375700	3276200	2070400
P40825	Alanine--tRNA ligase, mitochondrial	ALA1	sp|P40825|SYA_YEAST Alanine--tRNA ligase, mitochondrial OS=Saccharomyces cerevisiae (strain ATCC 204508 / S288c) GN=ALA1 PE=1 SV=3	1	29	33.1	110.06	983	0	323.31	2301900000	0	0	764880	148440000	0	0	0	2006700	10358000	3764100	0	1496700	0	0	206770000	487090000	41995000	93392000	70008000	132040000	67596000	26794000	59181000	18392000	213910000	16217000	72082000	49402000	151170000	78937000	54577000	70214000	28538000	40355000	64634000	30246000	22754000	17144000
Q05931	Heat shock protein SSQ1, mitochondrial	SSQ1	sp|Q05931|HSP7Q_YEAST Heat shock protein SSQ1, mitochondrial OS=Saccharomyces cerevisiae (strain ATCC 204508 / S288c) GN=SSQ1 PE=1 SV=1	1	10	17.8	72.364	657	0	57.977	204170000	2380700	0	0	2460500	130120000	0	0	0	0	3756200	0	0	0	0	0	0	0	0	0	0	0	3436500	0	0	2433300	7795700	0	0	1482800	0	16533000	20029000	2668200	0	2657400	0	8417600	0
P36517	54S ribosomal protein L4, mitochondrial	MRPL4	sp|P36517|RM04_YEAST 54S ribosomal protein L4, mitochondrial OS=Saccharomyces cerevisiae (strain ATCC 204508 / S288c) GN=MRPL4 PE=1 SV=2	1	8	29.8	36.964	319	0	52.207	381300000	2112500	0	1679200	1677400	0	0	0	2538000	0	3741600	0	0	1712600	2038000	0	1691400	0	0	0	2034400	3193000	6194500	4334900	5236100	0	0	15665000	304800000	0	0	0	0	0	2117300	0	0	14389000	4123500
P32583	Suppressor protein SRP40	SRP40	sp|P32583|SRP40_YEAST Suppressor protein SRP40 OS=Saccharomyces cerevisiae (strain ATCC 204508 / S288c) GN=SRP40 PE=1 SV=2	1	6	18.7	41.015	406	0	245.23	2627100000	12761000	737520	498270	0	1428500	11362000	9007100	3132400	3551600	3706500	6407800	1058700	6857900	0	1163100	0	935140	0	1407200	2112500	15489000	1901900000	238430000	0	28261000	12947000	9327100	11634000	9105100	25579000	18557000	26684000	26043000	25883000	48041000	23716000	107140000	0
P07260	Eukaryotic translation initiation factor 4E	CDC33	sp|P07260|IF4E_YEAST Eukaryotic translation initiation factor 4E OS=Saccharomyces cerevisiae (strain ATCC 204508 / S288c) GN=CDC33 PE=1 SV=1	1	9	42.3	24.254	213	0	178.9	703970000	1333600	1079900	554960	0	0	2986300	425310	0	1005100	3620300	40479000	0	796910	1405600	2382300	2028300	1923800	944760	0	6405100	0	1828300	6135400	0	5831600	11646000	33839000	539480	2452700	1143900	0	7325500	288150000	17893000	195940000	4077300	7581500	13429000
P04912;P04911	Histone H2A.2;Histone H2A.1	HTA2;HTA1	sp|P04912|H2A2_YEAST Histone H2A.2 OS=Saccharomyces cerevisiae (strain ATCC 204508 / S288c) GN=HTA2 PE=1 SV=2;sp|P04911|H2A1_YEAST Histone H2A.1 OS=Saccharomyces cerevisiae (strain ATCC 204508 / S288c) GN=HTA1 PE=1 SV=2	2	4	34.8	13.989	132	0	235.48	17358000000	156900000	8640700000	43143000	3402800	3218400	0	0	2716900	2129900	3520000	2435000	2689300	3639800	4912700	1627700	0	0	0	0	0	0	2334100	22103000	0	0	1823900	2392900	0	10673000	0	0	0	0	4567800	49802000	34721000	1103100000	7110800000
P26786	40S ribosomal protein S7-A	RPS7A	sp|P26786|RS7A_YEAST 40S ribosomal protein S7-A OS=Saccharomyces cerevisiae (strain ATCC 204508 / S288c) GN=RPS7A PE=1 SV=4	1	8	40.5	21.622	190	0	82.6	9314500000	2217800	0	0	0	0	550340	1599900	1483400	3194100	3489300	1356000	883040	2007900	958060	0	0	0	0	0	0	1320300	822210	1131600	2175500	886730	1809500	2482900	821220	3130000	1124600	21371000	17773000	34869000	162530000	8512800000	89323000	140420000	61822000
P31412	V-type proton ATPase subunit C	VMA5	sp|P31412|VATC_YEAST V-type proton ATPase subunit C OS=Saccharomyces cerevisiae (strain ATCC 204508 / S288c) GN=VMA5 PE=1 SV=4	1	8	24.2	44.188	392	0	134.46	510310000	0	802300	453770	0	0	2244800	338660000	1010400	0	3477000	0	0	0	0	0	0	0	0	0	0	0	0	0	0	858650	22143000	22749000	10038000	0	0	0	4262500	6055400	5366300	20275000	48579000	18673000	0
P49626	60S ribosomal protein L4-B	RPL4B	sp|P49626|RL4B_YEAST 60S ribosomal protein L4-B OS=Saccharomyces cerevisiae (strain ATCC 204508 / S288c) GN=RPL4B PE=1 SV=2	1	22	59.1	39.062	362	0	73.119	7430100000	0	0	0	0	597950	0	10646000	1394100000	3202700	3438400	0	0	0	361650	5524000	2537600	5021200	10405000	22817000	16684000	12429000	2213600	6126300	0	6969400	4712400000	744570000	99938000	124320000	64799000	21155000	12470000	42681000	23931000	30108000	4188900	32472000	9147600
P11792	Serine/threonine-protein kinase SCH9	SCH9	sp|P11792|SCH9_YEAST Serine/threonine-protein kinase SCH9 OS=Saccharomyces cerevisiae (strain ATCC 204508 / S288c) GN=SCH9 PE=1 SV=3	1	2	2.2	91.81	824	0.0092308	1.6468	48367000	0	0	0	1334800	0	0	0	0	0	3410400	0	0	0	0	0	4920000	2622100	1248800	0	2684000	4128600	13883000	2907800	0	0	0	0	0	0	0	0	1382900	0	0	9844600	0	0	0
P10614	Lanosterol 14-alpha demethylase	ERG11	sp|P10614|CP51_YEAST Lanosterol 14-alpha demethylase OS=Saccharomyces cerevisiae (strain ATCC 204508 / S288c) GN=ERG11 PE=1 SV=1	1	3	7.7	60.719	530	0	13.407	199060000	0	0	0	0	0	0	0	0	0	3409800	0	0	0	0	0	0	0	0	0	0	0	0	0	43348000	7297900	0	0	0	0	0	13298000	127160000	0	0	0	0	1778400	2767700
P45818	ATP-dependent RNA helicase ROK1	ROK1	sp|P45818|ROK1_YEAST ATP-dependent RNA helicase ROK1 OS=Saccharomyces cerevisiae (strain ATCC 204508 / S288c) GN=ROK1 PE=1 SV=1	1	11	23.8	63.652	564	0	234.19	944820000	3226000	0	368770	1136700	0	1440400	0	0	0	3404000	5426400	4313400	2960200	3909000	5060200	0	1938500	1319000	2258300	1966900	773810	729780000	9605800	0	3574900	21536000	0	3439600	4428100	3340000	4548700	0	0	35076000	16338000	2772000	62222000	2759500
P40032	Prolyl 3,4-dihydroxylase TPA1	TPA1	sp|P40032|TPA1_YEAST Prolyl 3,4-dihydroxylase TPA1 OS=Saccharomyces cerevisiae (strain ATCC 204508 / S288c) GN=TPA1 PE=1 SV=1	1	7	12	74.041	644	0	12.596	145660000	0	0	0	0	0	2076900	0	0	0	3378600	0	0	0	0	0	0	4255800	913780	6116200	75942000	0	0	13075000	0	0	0	0	0	0	0	19610000	16954000	0	0	0	0	3340400	0
P05755	40S ribosomal protein S9-B	RPS9B	sp|P05755|RS9B_YEAST 40S ribosomal protein S9-B OS=Saccharomyces cerevisiae (strain ATCC 204508 / S288c) GN=RPS9B PE=1 SV=4	1	16	50.8	22.298	195	0	323.31	37627000000	0	6204800	0	0	0	638980	7205000	7317900	755840	3348300	2397300	2747300	1718300	242920	0	3567900	0	0	0	656270	1568000	18926000	14267000	0	0	23936000	180070000	181270000	321090000	408480000	696710000	1499800000	2688800000	1683900000	26838000000	974140000	1006300000	693630000
Q12517	mRNA-decapping enzyme subunit 1	DCP1	sp|Q12517|DCP1_YEAST mRNA-decapping enzyme subunit 1 OS=Saccharomyces cerevisiae (strain ATCC 204508 / S288c) GN=DCP1 PE=1 SV=1	1	4	16	26.266	231	0	9.3744	91456000	0	0	0	0	0	0	1340900	0	0	3255700	0	0	0	0	0	0	0	0	0	0	0	0	0	2328800	0	0	0	0	0	0	0	65546000	5715000	1633800	0	0	7261200	1087200
Q03973	High mobility group protein 1	HMO1	sp|Q03973|HMO1_YEAST High mobility group protein 1 OS=Saccharomyces cerevisiae (strain ATCC 204508 / S288c) GN=HMO1 PE=1 SV=1	1	1	4.9	27.544	246	0.0069664	1.8587	7559100	0	0	0	0	0	0	0	0	0	3172700	0	0	0	0	0	0	0	0	0	0	0	0	0	0	0	0	0	0	0	0	2746500	1639900	0	0	0	0	0	0
P05737;Q12213	60S ribosomal protein L7-A;60S ribosomal protein L7-B	RPL7A;RPL7B	sp|P05737|RL7A_YEAST 60S ribosomal protein L7-A OS=Saccharomyces cerevisiae (strain ATCC 204508 / S288c) GN=RPL7A PE=1 SV=3;sp|Q12213|RL7B_YEAST 60S ribosomal protein L7-B OS=Saccharomyces cerevisiae (strain ATCC 204508 / S288c) GN=RPL7B PE=1 SV=3	2	11	48	27.638	244	0	197.63	3377400000	0	4886100	2536000	0	148990	0	0	1218300	1518300	3150200	4034600	0	0	0	0	0	30692000	0	0	0	3556600	11179000	0	0	2955700	70292000	88145000	58005000	78833000	159460000	197560000	813450000	679300000	118930000	57748000	245820000	654850000	45033000
P20434	DNA-directed RNA polymerases I, II, and III subunit RPABC1	RPB5	sp|P20434|RPAB1_YEAST DNA-directed RNA polymerases I, II, and III subunit RPABC1 OS=Saccharomyces cerevisiae (strain ATCC 204508 / S288c) GN=RPB5 PE=1 SV=1	1	5	28.8	25.079	215	0	195.95	457090000	0	0	0	0	0	0	0	235040	0	3140700	907260	8662900	0	0	771480	0	0	0	0	0	0	0	0	4332200	0	1124700	0	0	0	0	0	2443600	57367000	345840000	12706000	1491300	8558300	2925600
P53844	Phosphatidylinositol transfer protein PDR17	PDR17	sp|P53844|PDR17_YEAST Phosphatidylinositol transfer protein PDR17 OS=Saccharomyces cerevisiae (strain ATCC 204508 / S288c) GN=PDR17 PE=1 SV=1	1	6	19.4	40.677	350	0	23.14	99400000	0	0	0	2627300	0	0	0	21135000	0	3104200	0	0	0	0	0	0	8070700	0	0	0	0	0	7665700	0	0	33707000	2917200	0	0	0	3003200	6133800	2126400	0	3089200	0	5820100	0
P17558	37S ribosomal protein PET123, mitochondrial	PET123	sp|P17558|RTPT_YEAST 37S ribosomal protein PET123, mitochondrial OS=Saccharomyces cerevisiae (strain ATCC 204508 / S288c) GN=PET123 PE=1 SV=1	1	8	23.9	35.998	318	0	48.116	986930000	0	0	659260	0	0	277810000	1201200	11495000	10201000	3014000	1866300	0	0	0	0	3152000	0	0	0	0	0	0	6277100	0	31730000	210400000	149010000	18975000	27493000	58153000	5704100	9488900	15491000	7877700	43892000	7007000	62356000	12419000
P04397	Bifunctional protein GAL10;UDP-glucose 4-epimerase;Aldose 1-epimerase	GAL10	sp|P04397|GAL10_YEAST Bifunctional protein GAL10 OS=Saccharomyces cerevisiae (strain ATCC 204508 / S288c) GN=GAL10 PE=1 SV=2	1	1	2.3	78.194	699	0	3.1133	25395000	0	0	0	0	0	0	0	0	0	2993400	0	0	0	0	0	0	0	0	0	0	0	0	0	0	0	0	0	0	0	0	12300000	10102000	0	0	0	0	0	0
P21965	Protein kinase MCK1	MCK1	sp|P21965|MCK1_YEAST Protein kinase MCK1 OS=Saccharomyces cerevisiae (strain ATCC 204508 / S288c) GN=MCK1 PE=1 SV=1	1	10	31.7	43.135	375	0	53.047	4209400000	797010	0	0	4280400	0	56118000	2163400000	7099000	6919800	2961200	0	0	0	2911200	2977700	1282200	2144700	0	0	0	3142900	2782200	7955600	2371600	4990400	67827000	630660000	698900000	153750000	106240000	30980000	34551000	15182000	11142000	14472000	41010000	27464000	40610000
P32522	Pentatricopeptide repeat-containing protein PET309, mitochondrial	PET309	sp|P32522|PT309_YEAST Pentatricopeptide repeat-containing protein PET309, mitochondrial OS=Saccharomyces cerevisiae (strain ATCC 204508 / S288c) GN=PET309 PE=1 SV=1	1	10	10.9	112.64	965	0	46.251	148490000	3166000	2337900	1318000	3411200	2660500	4915100	3865600	3312800	3335000	2892200	3490100	2590200	2703300	2126000	2772800	52186000	1696500	1270800	0	2425000	2660600	0	6316800	5177100	5878100	981540	1780200	6382100	7187700	1856400	0	0	0	0	0	3092100	0	1318600
P25808	ATP-dependent rRNA helicase SPB4	SPB4	sp|P25808|SPB4_YEAST ATP-dependent rRNA helicase SPB4 OS=Saccharomyces cerevisiae (strain ATCC 204508 / S288c) GN=SPB4 PE=1 SV=1	1	14	22.6	69.421	606	0	63.58	544560000	3338200	1643700	0	10436000	13126000	13829000	17350000	5806600	9217900	2872900	1097200	1158700	4215300	5135200	9978900	4434300	3214500	4003000	1858600	1913300	296360000	26968000	3903100	5668400	16580000	3898900	10589000	32564000	4905500	6802900	4284300	7959400	0	2779800	4411800	1399800	0	0
P31334	54S ribosomal protein L9, mitochondrial	MRPL9	sp|P31334|RM09_YEAST 54S ribosomal protein L9, mitochondrial OS=Saccharomyces cerevisiae (strain ATCC 204508 / S288c) GN=MRPL9 PE=1 SV=3	1	4	16.7	29.79	269	0	8.5126	192980000	6720000	7017700	0	1357700	0	0	3901700	1677400	0	2868100	6771200	3855700	1257600	1846300	3771000	4708900	17180000	8446800	0	3365400	32466000	2045600	0	0	0	1205700	3566800	0	0	0	0	40194000	23484000	0	0	0	0	5689800
P42933	Stationary phase protein 5	SPG5	sp|P42933|SPG5_YEAST Stationary phase protein 5 OS=Saccharomyces cerevisiae (strain ATCC 204508 / S288c) GN=SPG5 PE=2 SV=3	1	4	12.1	42.162	373	0	80.453	185220000	5006200	0	0	0	0	0	0	0	0	2866600	0	0	0	0	0	0	0	0	0	0	0	0	0	0	0	0	0	0	0	0	7214300	170130000	0	0	0	0	0	0
P06780	GTP-binding protein RHO1	RHO1	sp|P06780|RHO1_YEAST GTP-binding protein RHO1 OS=Saccharomyces cerevisiae (strain ATCC 204508 / S288c) GN=RHO1 PE=1 SV=3	1	5	21.1	23.152	209	0	175.19	2340600000	5960700	2137900	0	0	0	0	0	0	0	2861400	0	1085300	5602200	0	0	0	0	10888000	5731700	785380	0	12630000	6831200	3303900	0	10540000	0	3290100	2524800	0	22871000	19767000	40131000	71138000	1330400000	168210000	444760000	102950000
P0CX54;P0CX53	60S ribosomal protein L12-B;60S ribosomal protein L12-A	RPL12B;RPL12A	sp|P0CX54|RL12B_YEAST 60S ribosomal protein L12-B OS=Saccharomyces cerevisiae (strain ATCC 204508 / S288c) GN=RPL12B PE=1 SV=1;sp|P0CX53|RL12A_YEAST 60S ribosomal protein L12-A OS=Saccharomyces cerevisiae (strain ATCC 204508 / S288c) GN=RPL12A PE=1 SV=1	2	6	51.5	17.822	165	0	266.63	7040300000	3235000	1354300	664500	1463600	0	0	0	2895900	5932200	2857200	12482000	12984000	643890000	3816900	877130	590670	0	0	0	757120	0	0	0	1952500	0	2241900	2823900	2461600	7323000	5784900	4534000	7646700	4669500	11853000	163800000	5973700000	117340000	15793000
P36080	Ribosomal RNA-processing protein 14	RRP14	sp|P36080|RRP14_YEAST Ribosomal RNA-processing protein 14 OS=Saccharomyces cerevisiae (strain ATCC 204508 / S288c) GN=RRP14 PE=1 SV=1	1	3	6.5	50.481	434	0	13.281	45115000	1309100	1664300	0	8677300	0	0	0	1340500	10111000	2819800	0	0	0	0	0	0	870760	1532500	0	0	0	1218700	15571000	0	0	0	0	0	0	0	0	0	0	0	0	0	0	0
P40327	26S protease regulatory subunit 4 homolog	RPT2	sp|P40327|PRS4_YEAST 26S protease regulatory subunit 4 homolog OS=Saccharomyces cerevisiae (strain ATCC 204508 / S288c) GN=RPT2 PE=1 SV=3	1	25	60.9	48.828	437	0	323.31	5614600000	10573000	3080500	1620800	8058300	915600	7896200	0	2321300	645210	2810800	5418100	6700300	6630400	4447600	6165500	3211200	1910300	933410	7527200	1569600	5311600	22095000	31055000	12210000	4501500000	141990000	183810000	50194000	99415000	33581000	105320000	75940000	29528000	23600000	61583000	22043000	68222000	13450000
P38333	Essential nuclear protein 1	ENP1	sp|P38333|ENP1_YEAST Essential nuclear protein 1 OS=Saccharomyces cerevisiae (strain ATCC 204508 / S288c) GN=ENP1 PE=1 SV=1	1	17	41.4	55.136	483	0	288.79	1158800000	1415600	1194100	1584800	4641800	0	0	0	0	0	2804700	1553700	0	0	0	0	4433000	0	907110	0	0	0	0	10063000	924160000	51410000	2423600	16760000	11482000	64114000	9338400	15293000	5432500	2329200	720920	1438300	797840	10173000	4620100
P38146	GTP-binding protein YPT10	YPT10	sp|P38146|YPT10_YEAST GTP-binding protein YPT10 OS=Saccharomyces cerevisiae (strain ATCC 204508 / S288c) GN=YPT10 PE=1 SV=2	1	4	22.6	21.834	199	0	12.754	92741000	0	0	0	0	0	4270700	0	0	0	2727000	8949200	0	0	0	0	0	0	0	0	0	0	0	0	0	0	0	0	0	0	0	12707000	0	0	1661600	58039000	2463900	1309400	613390
P43593	Ubiquitin carboxyl-terminal hydrolase 6	UBP6	sp|P43593|UBP6_YEAST Ubiquitin carboxyl-terminal hydrolase 6 OS=Saccharomyces cerevisiae (strain ATCC 204508 / S288c) GN=UBP6 PE=1 SV=1	1	12	31.7	57.11	499	0	323.31	793600000	3581200	0	0	0	0	0	0	0	0	2718500	1641700	1653100	1026200	850360	0	0	0	0	0	0	0	2429100	0	577770000	5819700	3449100	12920000	13095000	4363700	9898700	13887000	36384000	5954300	0	78233000	0	6879400	5172100
P27476	Nuclear localization sequence-binding protein	NSR1	sp|P27476|NSR1_YEAST Nuclear localization sequence-binding protein OS=Saccharomyces cerevisiae (strain ATCC 204508 / S288c) GN=NSR1 PE=1 SV=1	1	17	35.3	44.535	414	0	323.31	2342000000	1389200	0	0	0	0	5323900	5485700	12537000	10976000	2675100	611850	1026200	2511100	0	1268900	2481200	2273700	851310	1047400	2087600	5489200	15448000	38874000	1374700000	171690000	141460000	150550000	49336000	110680000	29886000	15206000	29926000	21293000	6984400	17401000	18035000	59467000	28942000
Q99278	Mediator of RNA polymerase II transcription subunit 11	MED11	sp|Q99278|MED11_YEAST Mediator of RNA polymerase II transcription subunit 11 OS=Saccharomyces cerevisiae (strain ATCC 204508 / S288c) GN=MED11 PE=1 SV=2	1	2	22.6	13.307	115	0	5.9817	33887000	0	0	0	0	0	0	0	0	0	2661300	0	0	0	2574600	0	0	0	0	0	0	0	0	0	0	0	0	0	0	0	0	1455100	0	0	0	0	0	0	0
P36040	Proteasome assembly chaperone 2	ADD66	sp|P36040|POC2_YEAST Proteasome assembly chaperone 2 OS=Saccharomyces cerevisiae (strain ATCC 204508 / S288c) GN=ADD66 PE=1 SV=1	1	5	15.4	30.739	267	0	27.915	161570000	0	0	0	0	0	0	0	0	1244200	2651500	0	0	0	0	0	0	0	0	0	0	0	0	0	0	0	0	0	0	5322000	3491200	56043000	92818000	0	0	0	0	0	0
P21771	37S ribosomal protein S28, mitochondrial	MRPS28	sp|P21771|RT28_YEAST 37S ribosomal protein S28, mitochondrial OS=Saccharomyces cerevisiae (strain ATCC 204508 / S288c) GN=MRPS28 PE=1 SV=1	1	11	37.8	33.057	286	0	323.31	656320000	0	0	0	0	6029200	2573900	0	0	3694200	2649100	0	0	0	0	13730000	6237200	0	5132300	1857500	0	1622800	627850	2020700	0	9474800	8460300	5072200	31892000	0	0	532260000	3465100	5172400	4974400	0	1759100	1627400	0
P26783	40S ribosomal protein S5	RPS5	sp|P26783|RS5_YEAST 40S ribosomal protein S5 OS=Saccharomyces cerevisiae (strain ATCC 204508 / S288c) GN=RPS5 PE=1 SV=3	1	10	39.6	25.038	225	0	201.37	11548000000	0	1948800	1012000	0	1330400	2578200	3378600	0	4487100	2638700	778490000	378070	0	0	0	1511300	0	0	0	1500900	4435400	5392900	1389700	4510700	23763000	12611000	49608000	21442000	10450000	17824000	35410000	151260000	7588900000	1191900000	412780000	282070000	561110000	149830000
P61830	Histone H3	HHT1	sp|P61830|H3_YEAST Histone H3 OS=Saccharomyces cerevisiae (strain ATCC 204508 / S288c) GN=HHT1 PE=1 SV=2	1	3	16.9	15.356	136	0	19.807	15499000000	4510400000	34636000	13709000	871740	0	89590000	0	31857000	5369000	2634900	1872100	2582400	6716900	6787400	1183400	0	0	0	45627000	12305000	3667900	1993800	3517300	2092600	5361900	24861000	46274000	35927000	36789000	41992000	52465000	79013000	94044000	56210000	116270000	65297000	9851300000	111660000
P02992	Elongation factor Tu, mitochondrial	TUF1	sp|P02992|EFTU_YEAST Elongation factor Tu, mitochondrial OS=Saccharomyces cerevisiae (strain ATCC 204508 / S288c) GN=TUF1 PE=1 SV=1	1	11	30.2	47.972	437	0	111.42	874670000	0	976170	0	0	0	18811000	118220000	2396900	4775800	2553100	0	0	0	0	0	7599100	0	0	0	1531100	3652100	0	1195500	14608000	2526200	103020000	275380000	79883000	70414000	15442000	31561000	37897000	5872600	11861000	18072000	2979000	18064000	21682000
P40987	Chromosome instability protein 1	CIN1	sp|P40987|CIN1_YEAST Chromosome instability protein 1 OS=Saccharomyces cerevisiae (strain ATCC 204508 / S288c) GN=CIN1 PE=1 SV=1	1	4	3.6	116.65	1014	0	4.2428	2059000000	1627200	0	0	3388700	0	7364900	4645000	0	20410000	2552900	2606000	3653500	4525600	0	0	17957000	0	5265300	3138800	3471500	5490300	0	0	0	0	0	2829800	156140000	3363100	0	2491100	1428800	1781200000	2075000	2560900	4965000	3469700	2659300
Q02753	60S ribosomal protein L21-A	RPL21A	sp|Q02753|RL21A_YEAST 60S ribosomal protein L21-A OS=Saccharomyces cerevisiae (strain ATCC 204508 / S288c) GN=RPL21A PE=1 SV=1	1	6	41.9	18.242	160	0	96.779	13458000000	2553100	0	13288000	6787400	1138100	12502000	5789200	0	9095700	2537600	2129300	9159300	1437300000	13892000	2446800	4822500	11665000	1587000	0	7762500	8601000	11244000	16670000	22121000	14618000	19264000	60159000	52687000	77193000	108520000	135670000	132310000	297590000	245970000	389650000	8076100000	1155200000	840770000
P40484	DBF2 kinase activator protein MOB1	MOB1	sp|P40484|MOB1_YEAST DBF2 kinase activator protein MOB1 OS=Saccharomyces cerevisiae (strain ATCC 204508 / S288c) GN=MOB1 PE=1 SV=2	1	3	10.5	35.882	314	0	40.743	145860000	0	0	0	0	0	0	0	0	31097000	2537400	10541000	0	0	0	0	0	0	0	0	0	0	0	0	0	0	0	0	15617000	61565000	2908200	0	21594000	0	0	0	0	0	0
P24783	ATP-dependent RNA helicase DBP2	DBP2	sp|P24783|DBP2_YEAST ATP-dependent RNA helicase DBP2 OS=Saccharomyces cerevisiae (strain ATCC 204508 / S288c) GN=DBP2 PE=1 SV=1	1	25	43.2	60.999	546	0	323.31	10552000000	2309900	4955800	4853600	6575500	7079000	12111000	1345200	6423000	3678000	2536900	0	0	317240	0	16489000	15900000	1543700	9828800	6448600	8327200	139990000	46701000	9107500000	90121000	63003000	78280000	173740000	165650000	151720000	106760000	18027000	38025000	1504400	44520000	63320000	39591000	74020000	29616000
P14681	Mitogen-activated protein kinase KSS1	KSS1	sp|P14681|KSS1_YEAST Mitogen-activated protein kinase KSS1 OS=Saccharomyces cerevisiae (strain ATCC 204508 / S288c) GN=KSS1 PE=1 SV=1	1	7	19.8	42.692	368	0	15.625	190250000	0	0	0	0	0	0	2732100	11606000	1945300	2519700	488960	0	0	0	0	0	0	0	0	0	0	0	1558300	0	0	132210000	6593900	9263700	1382700	10527000	543750	0	4321800	2687400	0	0	1865500	0
P22936	DNA-(apurinic or apyrimidinic site) lyase 1	APN1	sp|P22936|APN1_YEAST DNA-(apurinic or apyrimidinic site) lyase 1 OS=Saccharomyces cerevisiae (strain ATCC 204508 / S288c) GN=APN1 PE=1 SV=4	1	4	12.3	41.439	367	0	4.9726	55182000	0	0	0	0	0	3705600	5100900	5839800	0	2486500	0	0	0	0	0	3848800	0	0	0	0	0	0	0	0	0	7234100	2230800	0	0	2904600	0	0	0	21831000	0	0	0	0
P22135	Protein ATP12, mitochondrial	ATP12	sp|P22135|ATP12_YEAST Protein ATP12, mitochondrial OS=Saccharomyces cerevisiae (strain ATCC 204508 / S288c) GN=ATP12 PE=1 SV=2	1	5	14.8	36.554	325	0	59.635	183690000	0	0	0	3015300	0	0	0	0	5024200	2310000	0	0	0	0	0	0	0	2332600	0	2506500	3288400	3455100	0	26435000	11112000	2588000	0	23852000	8366400	59490000	0	0	0	4914800	0	3499900	17892000	0
P32916	Signal recognition particle receptor subunit alpha homolog	SRP101	sp|P32916|SRPR_YEAST Signal recognition particle receptor subunit alpha homolog OS=Saccharomyces cerevisiae (strain ATCC 204508 / S288c) GN=SRP101 PE=1 SV=2	1	6	12.1	69.277	621	0	17.216	175940000	0	0	0	2900600	0	0	0	0	0	2283500	0	0	5168400	0	0	278270	0	0	0	3922200	88026000	0	0	5162900	1509900	0	25303000	10857000	6009300	946750	6783500	0	16784000	0	0	0	0	0
Q04004	Phosducin-like protein 1	PLP1	sp|Q04004|PLP1_YEAST Phosducin-like protein 1 OS=Saccharomyces cerevisiae (strain ATCC 204508 / S288c) GN=PLP1 PE=1 SV=1	1	3	13.5	26.622	230	0	6.1404	68965000	0	0	0	0	0	0	2204800	0	0	2267000	0	0	0	0	2980500	0	0	0	0	0	0	0	0	0	0	0	0	0	0	0	22786000	30561000	2094200	923860	0	0	3739700	1408100
P40024	ABC transporter ATP-binding protein ARB1	ARB1	sp|P40024|ARB1_YEAST ABC transporter ATP-binding protein ARB1 OS=Saccharomyces cerevisiae (strain ATCC 204508 / S288c) GN=ARB1 PE=1 SV=1	1	27	44.6	68.376	610	0	323.31	12921000000	0	0	0	7568600	10225000	3329400	12914000	769560	2456300	2184400	453760	0	1574500	0	43623000	10094000	11769000	11874000	19711000	11039000	9225000000	1847900000	251740000	11498000	91041000	31163000	116320000	92947000	142760000	210300000	104380000	129600000	83710000	157190000	68649000	90025000	66162000	21152000
P26784	60S ribosomal protein L16-A	RPL16A	sp|P26784|RL16A_YEAST 60S ribosomal protein L16-A OS=Saccharomyces cerevisiae (strain ATCC 204508 / S288c) GN=RPL16A PE=1 SV=3	1	11	42.2	22.201	199	0	247.31	6226300000	0	0	0	0	1407900	0	1048200	3654500	70009000	2173100	2777900	3346200	11256000	0	0	0	0	0	0	1100400	0	6059600	0	5773200	5121700	29141000	43537000	48598000	168640000	47704000	33496000	46958000	28845000	17553000	5129500000	288500000	143930000	57702000
P05453	Eukaryotic peptide chain release factor GTP-binding subunit	SUP35	sp|P05453|ERF3_YEAST Eukaryotic peptide chain release factor GTP-binding subunit OS=Saccharomyces cerevisiae (strain ATCC 204508 / S288c) GN=SUP35 PE=1 SV=1	1	38	46.9	76.55	685	0	323.31	7882900000	1343000	0	0	122280000	8869100	1513700	1661800	5785400	428850	2169900	932190	0	1493400	0	22403000	46015000	5803500000	333740000	49936000	22537000	285330000	130740000	14431000	95827000	381370000	15592000	150310000	67515000	59975000	45067000	54433000	25212000	27323000	16504000	12380000	2914600	38165000	21300000
Q06616	Nuclear envelope protein YPR174C	YPR174C	sp|Q06616|YP174_YEAST Nuclear envelope protein YPR174C OS=Saccharomyces cerevisiae (strain ATCC 204508 / S288c) GN=YPR174C PE=1 SV=1	1	1	8.6	25.411	221	0	4.306	8032500	0	0	0	0	0	0	0	0	0	2164000	0	0	0	0	0	0	0	0	0	0	0	0	0	0	0	0	0	0	0	0	0	5868500	0	0	0	0	0	0
P38687	Signal recognition particle subunit SRP68	SRP68	sp|P38687|SRP68_YEAST Signal recognition particle subunit SRP68 OS=Saccharomyces cerevisiae (strain ATCC 204508 / S288c) GN=SRP68 PE=1 SV=1	1	9	17	69.005	599	0	48.97	301990000	0	842310	1788300	4334500	1053100	6315400	1804500	1215600	1233900	2156600	0	0	0	0	5641600	2693200	0	481040	735640	0	226070000	28664000	5312400	0	1126300	0	0	2402000	0	1233300	0	1936500	0	4014400	0	0	0	0
P32614	Fumarate reductase 1	FRD1	sp|P32614|FRDS_YEAST Fumarate reductase 1 OS=Saccharomyces cerevisiae (strain ATCC 204508 / S288c) GN=FRD1 PE=1 SV=1	1	6	14.3	50.843	470	0	21.779	278800000	0	0	596990	0	1360900	0	5724100	0	20229000	2150900	0	0	0	0	1075900	0	0	0	0	0	0	0	0	3843600	43660000	10509000	0	10691000	47668000	3940100	0	0	0	0	112870000	13266000	0	1212800
P40348	Replication factor C subunit 2	RFC2	sp|P40348|RFC2_YEAST Replication factor C subunit 2 OS=Saccharomyces cerevisiae (strain ATCC 204508 / S288c) GN=RFC2 PE=1 SV=1	1	15	46.7	39.741	353	0	323.31	2065200000	0	0	13238000	492730	0	585870	0	0	0	2150700	2007500	0	445380	0	0	0	0	0	0	665660	0	0	0	9287900	0	0	1219800000	636250000	61811000	75128000	8161800	3033000	4227700	1371100	2968700	0	5009600	2265100
Q02767	Vacuolar protein sorting-associated protein 28	VPS28	sp|Q02767|VPS28_YEAST Vacuolar protein sorting-associated protein 28 OS=Saccharomyces cerevisiae (strain ATCC 204508 / S288c) GN=VPS28 PE=1 SV=1	1	3	17.4	27.702	242	0	10.896	81224000	0	0	0	0	0	0	0	0	0	2142300	9739100	0	0	0	0	0	0	0	0	0	0	0	0	0	0	0	0	0	0	0	4473400	7775400	34346000	22748000	0	0	0	0
Q12449	Hsp90 co-chaperone AHA1	AHA1	sp|Q12449|AHA1_YEAST Hsp90 co-chaperone AHA1 OS=Saccharomyces cerevisiae (strain ATCC 204508 / S288c) GN=AHA1 PE=1 SV=1	1	6	20.9	39.435	350	0	38.136	342130000	0	1197200	0	0	0	1342800	66781000	4604000	5488700	2104900	3579300	0	2589600	0	0	486030	0	0	0	1294100	0	0	0	0	0	9313100	5985200	1092800	17858000	11926000	0	4442200	21604000	8902100	67747000	93828000	3858200	1409700
P15891	Actin-binding protein	ABP1	sp|P15891|ABP1_YEAST Actin-binding protein OS=Saccharomyces cerevisiae (strain ATCC 204508 / S288c) GN=ABP1 PE=1 SV=4	1	14	28.4	65.575	592	0	121.56	371700000	0	0	1940400	0	0	8793100	6058300	1410900	2293300	1902000	3199100	0	0	0	0	0	0	138330000	60118000	0	1435900	0	1477600	0	12101000	5524400	24837000	4715700	9588600	14316000	8215300	2380400	5350500	8612800	0	1655800	31781000	12160000
P38252	Putative uncharacterized protein YBR089W		sp|P38252|YBT9_YEAST Putative uncharacterized protein YBR089W OS=Saccharomyces cerevisiae (strain ATCC 204508 / S288c) GN=YBR089W PE=5 SV=1	1	2	7	22.094	199	0.005102	1.916	105210000	14035000	10237000	5764900	4251200	5119700	0	3550600	3913500	3028200	1889500	24560000	1437200	1514800	1619200	0	1568900	820340	0	797200	607540	0	0	0	0	0	0	0	10863000	6338700	3290600	0	0	0	0	0	0	0	0
P32605	U1 small nuclear ribonucleoprotein A	MUD1	sp|P32605|RU1A_YEAST U1 small nuclear ribonucleoprotein A OS=Saccharomyces cerevisiae (strain ATCC 204508 / S288c) GN=MUD1 PE=1 SV=1	1	10	36.9	34.378	298	0	104.52	352810000	0	0	13783000	1192200	0	0	0	0	22980000	1875400	0	0	0	0	0	0	0	0	0	1006600	0	0	0	8492600	0	0	0	0	220130000	76498000	745330	0	0	0	0	0	6106100	0
P00830	ATP synthase subunit beta, mitochondrial	ATP2	sp|P00830|ATPB_YEAST ATP synthase subunit beta, mitochondrial OS=Saccharomyces cerevisiae (strain ATCC 204508 / S288c) GN=ATP2 PE=1 SV=2	1	21	64	54.793	511	0	323.31	4156000000	2935000	0	3054500	0	1700600	0	4867300	6877100	3679700	1874400	2379600	1884600	2256500	595010	2336000	8900800	0	1611200	0	2330200	0	0	0	0	3860300000	46108000	59689000	14932000	65246000	16454000	2627100	0	1927400	4339900	1568600	0	7091600	0
P38628	Phosphoacetylglucosamine mutase	PCM1	sp|P38628|AGM1_YEAST Phosphoacetylglucosamine mutase OS=Saccharomyces cerevisiae (strain ATCC 204508 / S288c) GN=PCM1 PE=1 SV=2	1	4	6.1	62.066	557	0	4.9973	121600000	743960	0	434280	0	0	0	0	1226000	4563100	1851400	760540	0	1110600	0	947760	0	0	0	0	0	825700	2417000	62549000	4742900	2964600	0	1964900	16742000	1267300	3818000	0	0	7057700	0	0	0	0	1651300
P32466	Low-affinity glucose transporter HXT3	HXT3	sp|P32466|HXT3_YEAST Low-affinity glucose transporter HXT3 OS=Saccharomyces cerevisiae (strain ATCC 204508 / S288c) GN=HXT3 PE=1 SV=1	1	5	11.1	62.557	567	0	30.008	822670000	2503700	0	1294600	103330000	63767000	67928000	275630000	3882900	1822300	1845700	0	1416400	2181700	1669200	76703000	32081000	22113000	17131000	13332000	19133000	13859000	28906000	40909000	0	19664000	0	0	0	0	5029100	0	0	0	1875300	0	2539700	0	2127200
P12688	Serine/threonine-protein kinase YPK1	YPK1	sp|P12688|YPK1_YEAST Serine/threonine-protein kinase YPK1 OS=Saccharomyces cerevisiae (strain ATCC 204508 / S288c) GN=YPK1 PE=1 SV=2	1	15	24.1	76.479	680	0	271.3	962890000	0	6331500	0	0	5918900	0	0	4290900	0	1825200	6866100	0	0	2258400	1036500	2187600	6202900	20383000	379560000	99572000	101020000	114420000	32729000	8284800	19011000	19526000	23633000	19395000	6174500	20228000	8480500	2691500	0	6718300	11534000	9728800	13136000	0
Q06287	Ribosomal RNA small subunit methyltransferase NEP1	EMG1	sp|Q06287|NEP1_YEAST Ribosomal RNA small subunit methyltransferase NEP1 OS=Saccharomyces cerevisiae (strain ATCC 204508 / S288c) GN=EMG1 PE=1 SV=1	1	10	35.7	27.895	252	0	174.85	776690000	0	0	2634100	0	5691600	0	0	0	0	1787800	1680800	0	0	0	0	0	0	0	0	0	0	0	0	0	0	0	0	0	4697500	0	8120400	13601000	517210000	167550000	31889000	13603000	7193900	0
Q08972	[NU+] prion formation protein 1	NEW1	sp|Q08972|NEW1_YEAST [NU+] prion formation protein 1 OS=Saccharomyces cerevisiae (strain ATCC 204508 / S288c) GN=NEW1 PE=1 SV=1	1	30	26.9	134.33	1196	0	323.31	1792400000	19373000	0	403390	30315000	26767000	65434000	122310000	2443900	0	1775600	3622900	0	865080	0	711060000	156300000	122070000	36771000	33695000	68353000	25735000	48696000	22375000	6099200	22387000	6637700	65926000	43002000	21965000	14677000	14239000	21357000	3027400	8083600	19473000	5813500	25522000	1755000
P39954	Adenosylhomocysteinase	SAH1	sp|P39954|SAHH_YEAST Adenosylhomocysteinase OS=Saccharomyces cerevisiae (strain ATCC 204508 / S288c) GN=SAH1 PE=1 SV=1	1	4	11.4	49.125	449	0	19.071	93235000	0	1705300	0	0	1217200	70447000	5854200	0	0	1759100	0	0	0	0	0	0	0	0	0	3961500	0	0	0	0	0	1856000	0	0	0	0	6434100	0	0	0	0	0	0	0
Q07623	Nucleolar protein 6	NOP6	sp|Q07623|NOP6_YEAST Nucleolar protein 6 OS=Saccharomyces cerevisiae (strain ATCC 204508 / S288c) GN=NOP6 PE=1 SV=1	1	7	39.1	25.216	225	0	227.96	446370000	0	0	0	0	0	0	0	0	0	1742500	0	0	0	0	0	0	0	0	0	0	0	0	0	0	0	0	0	0	0	0	332300000	13746000	10691000	6323100	8188600	1695300	71543000	140420
P48570;Q12122	Homocitrate synthase, cytosolic isozyme;Homocitrate synthase, mitochondrial	LYS20;LYS21	sp|P48570|HOSC_YEAST Homocitrate synthase, cytosolic isozyme OS=Saccharomyces cerevisiae (strain ATCC 204508 / S288c) GN=LYS20 PE=1 SV=1;sp|Q12122|HOSM_YEAST Homocitrate synthase, mitochondrial OS=Saccharomyces cerevisiae (strain ATCC 204508 / S288c) GN=LY	2	15	37.9	47.098	428	0	207.06	3560500000	0	0	0	0	3715800	2811700000	15415000	25976000	51603000	1717100	1331800	1837100	8151200	359970	1234900	2134200	0	0	2075200	1970100	1152200	1022900	0	0	9104800	30820000	81650000	57909000	130180000	115270000	19494000	15809000	13870000	16856000	34850000	17335000	61425000	5211400
P06169;Q07471	Pyruvate decarboxylase isozyme 1	PDC1	sp|P06169|PDC1_YEAST Pyruvate decarboxylase isozyme 1 OS=Saccharomyces cerevisiae (strain ATCC 204508 / S288c) GN=PDC1 PE=1 SV=7	2	27	54.9	61.495	563	0	323.31	38943000000	0	590670	2129200	91845000	27308000	38684000	51608000	20743000	12529000	1710200	1224500	474770	556620	808970	97959000	49896000	55991000	20458000	39607000	27087000	98962000	245070000	32867000000	947620000	601730000	463970000	749760000	231510000	340330000	362070000	123680000	149810000	112860000	148490000	296490000	101540000	181200000	77107000
P0CX83;P0CX82	60S ribosomal protein L19-B;60S ribosomal protein L19-A	RPL19B;RPL19A	sp|P0CX83|RL19B_YEAST 60S ribosomal protein L19-B OS=Saccharomyces cerevisiae (strain ATCC 204508 / S288c) GN=RPL19B PE=1 SV=1;sp|P0CX82|RL19A_YEAST 60S ribosomal protein L19-A OS=Saccharomyces cerevisiae (strain ATCC 204508 / S288c) GN=RPL19A PE=1 SV=1	2	7	30.2	21.704	189	0	177.33	4606700000	10081000	0	1811900	2668400	0	3342600	1487800	0	1525700	1684100	2110900	17461000	813140	2808700	0	2334900	945930	0	0	616800	0	2522600	10318000	12614000	2037800	72777000	157590000	122970000	124150000	183300000	199820000	422790000	204580000	144480000	1724200000	250580000	747260000	56954000
P32589	Heat shock protein homolog SSE1	SSE1	sp|P32589|HSP7F_YEAST Heat shock protein homolog SSE1 OS=Saccharomyces cerevisiae (strain ATCC 204508 / S288c) GN=SSE1 PE=1 SV=4	1	35	48.3	77.365	693	0	323.31	5425300000	858550	0	298480	2105800	5358100	1336100	4782900	996790	2492500	1638000	0	0	871090	0	15967000	9442000	137650000	1654400000	1657700000	469020000	164080000	453890000	98339000	187310000	49028000	43368000	24581000	32828000	15054000	139490000	18636000	37865000	39528000	13805000	7707000	24056000	29425000	10557000
P19414	Aconitate hydratase, mitochondrial	ACO1	sp|P19414|ACON_YEAST Aconitate hydratase, mitochondrial OS=Saccharomyces cerevisiae (strain ATCC 204508 / S288c) GN=ACO1 PE=1 SV=2	1	30	40	85.367	778	0	323.31	2682800000	0	0	693890	0	0	10736000	71517000	0	0	1608200	0	3126500	718060	0	3459400	18690000	2093300000	116630000	6289800	30507000	12286000	33399000	27217000	14245000	88050000	25931000	11530000	17449000	5440900	58523000	2421900	5535500	9182800	4366400	0	0	914420	0
Q12285	Ubiquitin-like protein MDY2	MDY2	sp|Q12285|MDY2_YEAST Ubiquitin-like protein MDY2 OS=Saccharomyces cerevisiae (strain ATCC 204508 / S288c) GN=MDY2 PE=1 SV=1	1	3	16.5	23.732	212	0	21.364	45922000	0	0	0	0	0	0	0	0	0	1594700	0	0	0	0	0	0	0	0	0	0	0	0	0	0	0	0	0	0	0	0	0	40308000	2406800	1612400	0	0	0	0
P40303	Proteasome subunit alpha type-4	PRE6	sp|P40303|PSA4_YEAST Proteasome subunit alpha type-4 OS=Saccharomyces cerevisiae (strain ATCC 204508 / S288c) GN=PRE6 PE=1 SV=1	1	7	36.2	28.439	254	0	261.02	1026300000	0	0	0	0	0	0	0	0	0	1571900	0	0	0	0	0	0	0	0	0	0	0	0	0	0	0	0	8369300	8859100	10667000	9588200	660630000	136270000	35309000	13229000	9416000	4258600	34013000	57766000
Q07651	SUR7 family protein FMP45	FMP45	sp|Q07651|FMP45_YEAST SUR7 family protein FMP45 OS=Saccharomyces cerevisiae (strain ATCC 204508 / S288c) GN=FMP45 PE=1 SV=1	1	4	17.8	34.135	309	0	69.717	540440000	0	0	0	0	0	0	0	0	0	1549700	0	0	0	0	0	0	0	0	0	0	0	0	0	0	0	0	45877000	236250000	2169700	170350000	9811600	45059000	5681000	20591000	0	3101600	0	0
P36525	54S ribosomal protein L24, mitochondrial	MRPL24	sp|P36525|RM24_YEAST 54S ribosomal protein L24, mitochondrial OS=Saccharomyces cerevisiae (strain ATCC 204508 / S288c) GN=MRPL24 PE=1 SV=2	1	10	33.7	30.049	258	0	40.033	473490000	0	0	0	0	1762300	0	0	0	0	1540100	0	0	0	0	0	0	0	0	4134500	607770	0	0	5692600	0	0	0	0	0	0	0	147720000	307740000	0	1966800	0	0	0	0
P0CY09;P0CY08;P0CY13	Silenced mating-type protein ALPHA2;Mating-type protein ALPHA2;Silenced mating-type protein A2	HMLALPHA2;MATALPHA2;HMRA2	sp|P0CY09|HMAL2_YEAST Silenced mating-type protein ALPHA2 OS=Saccharomyces cerevisiae (strain ATCC 204508 / S288c) GN=HMLALPHA2 PE=3 SV=1;sp|P0CY08|MTAL2_YEAST Mating-type protein ALPHA2 OS=Saccharomyces cerevisiae (strain ATCC 204508 / S288c) GN=MATALPHA2	3	10	51.4	24.282	210	0	323.31	587070000	0	0	0	1451400	1071800	6406200	0	0	420510	1539500	4995500	124180000	0	592520	0	1413700	0	0	0	0	4584600	7625800	0	0	0	0	413840	0	1002700	0	7312600	10635000	23026000	379290000	823940	0	1791700	0
P38243	Uncharacterized protein YBR071W		sp|P38243|YBS1_YEAST Uncharacterized protein YBR071W OS=Saccharomyces cerevisiae (strain ATCC 204508 / S288c) GN=YBR071W PE=1 SV=1	1	2	12.8	23.548	211	0	9.6079	58546000	0	0	0	0	0	0	0	0	0	1528700	0	0	0	0	0	0	0	0	0	0	0	0	0	0	0	0	0	0	0	0	23564000	18224000	4131900	11096000	0	0	0	0
P53226	Bud site selection protein 9	BUD9	sp|P53226|BUD9_YEAST Bud site selection protein 9 OS=Saccharomyces cerevisiae (strain ATCC 204508 / S288c) GN=BUD9 PE=1 SV=1	1	1	2.9	60.75	547	0	3.2823	5064900	0	0	0	0	0	0	0	0	0	1526100	0	3538800	0	0	0	0	0	0	0	0	0	0	0	0	0	0	0	0	0	0	0	0	0	0	0	0	0	0
P0CX85;P0CX84	60S ribosomal protein L35-B;60S ribosomal protein L35-A	RPL35B;RPL35A	sp|P0CX85|RL35B_YEAST 60S ribosomal protein L35-B OS=Saccharomyces cerevisiae (strain ATCC 204508 / S288c) GN=RPL35B PE=1 SV=1;sp|P0CX84|RL35A_YEAST 60S ribosomal protein L35-A OS=Saccharomyces cerevisiae (strain ATCC 204508 / S288c) GN=RPL35A PE=1 SV=1	2	9	37.5	13.909	120	0	224.23	5059900000	0	29782000	0	5671200	1155000	11864000	0	0	0	1468900	0	0	0	0	0	0	803110	0	0	1541000	0	0	4791800	9097400	4342900	0	0	0	1888700	0	0	0	0	0	7150900	48565000	2282500000	2189400000
P10081	ATP-dependent RNA helicase eIF4A	TIF1	sp|P10081|IF4A_YEAST ATP-dependent RNA helicase eIF4A OS=Saccharomyces cerevisiae (strain ATCC 204508 / S288c) GN=TIF1 PE=1 SV=3	1	18	54.7	44.697	395	0	323.31	8194900000	107250000	116020000	82793000	76065000	84365000	175140000	458590000	115310000	8103600	1429100	0	0	12368000	1420200	99778000	23838000	3080900	6850700	5106000	10328000	21651000	119950000	172380000	9102700	59976000	799550000	2052100000	607380000	567050000	230550000	184820000	222600000	119050000	196240000	274460000	254970000	253390000	220880000
P31688	Trehalose-phosphatase	TPS2	sp|P31688|TPS2_YEAST Trehalose-phosphatase OS=Saccharomyces cerevisiae (strain ATCC 204508 / S288c) GN=TPS2 PE=1 SV=3	1	17	22	102.98	896	0	142.06	452750000	2143100	0	0	0	0	0	14105000	0	0	1383600	0	0	5561500	0	0	231230000	3187300	5182900	10472000	2370600	20425000	0	870690	0	20233000	0	5595500	72333000	0	4990800	3957700	0	0	2369900	0	27607000	5301600	2245100
P17967	Protein disulfide-isomerase	PDI1	sp|P17967|PDI_YEAST Protein disulfide-isomerase OS=Saccharomyces cerevisiae (strain ATCC 204508 / S288c) GN=PDI1 PE=1 SV=2	1	17	34.9	58.226	522	0	323.31	1612300000	10168000	5750100	0	0	0	118500000	0	0	0	1376000	0	0	0	0	1262400	808590	581610	0	0	0	1227200000	16821000	30837000	3164600	33484000	15896000	20522000	2501200	4433500	12358000	10589000	8049700	0	1247700	0	0	77119000	1014300
Q12464	RuvB-like protein 2	RVB2	sp|Q12464|RUVB2_YEAST RuvB-like protein 2 OS=Saccharomyces cerevisiae (strain ATCC 204508 / S288c) GN=RVB2 PE=1 SV=1	1	15	34.2	51.611	471	0	203.3	904430000	0	0	0	4696300	0	0	2045100	0	0	1363900	0	0	0	932240	0	0	0	1071400	0	4908800	439590	0	31021000	32418000	470890000	0	1539200	2349800	0	0	2689600	7488100	157040000	34274000	85106000	1776800	11750000	4872200
Q07478	ATP-dependent RNA helicase SUB2	SUB2	sp|Q07478|SUB2_YEAST ATP-dependent RNA helicase SUB2 OS=Saccharomyces cerevisiae (strain ATCC 204508 / S288c) GN=SUB2 PE=1 SV=1	1	19	39.9	50.308	446	0	323.31	6710100000	0	8394500	1229900	836860	1164600	13332000	12399000	8500500	36913000	1357000	0	0	3254100	5521000	2879300	5164800	2832600	2787800	9602100	20880000	11806000	13566000	45594000	4589900	4308300000	283300000	395660000	335440000	130060000	113380000	143560000	74584000	67636000	54085000	209180000	94329000	119740000	69897000
P38429	Transcriptional regulatory protein SAP30	SAP30	sp|P38429|SAP30_YEAST Transcriptional regulatory protein SAP30 OS=Saccharomyces cerevisiae (strain ATCC 204508 / S288c) GN=SAP30 PE=1 SV=2	1	1	6.5	23.026	201	0	4.2226	4597000	0	0	0	0	0	0	0	0	0	1350500	526300	0	0	0	0	0	0	0	0	0	0	0	0	0	0	0	0	0	0	0	0	2720200	0	0	0	0	0	0
P32939	GTP-binding protein YPT7	YPT7	sp|P32939|YPT7_YEAST GTP-binding protein YPT7 OS=Saccharomyces cerevisiae (strain ATCC 204508 / S288c) GN=YPT7 PE=1 SV=1	1	7	46.2	23.042	208	0	282.72	2248000000	1857100	1040800	1071100	0	1775000	0	2058300	1117000	0	1349200	1418400	3367400	955980	1914500	1564400	0	1505400	991850	1451500	3924200	0	0	0	0	0	0	0	0	0	0	0	435540	2974600	9090500	2021200000	17936000	11754000	51756000
P53131	Pre-mRNA-splicing factor ATP-dependent RNA helicase PRP43	PRP43	sp|P53131|PRP43_YEAST Pre-mRNA-splicing factor ATP-dependent RNA helicase PRP43 OS=Saccharomyces cerevisiae (strain ATCC 204508 / S288c) GN=PRP43 PE=1 SV=1	1	26	37.3	87.561	767	0	323.31	4530000000	712670	0	4251200	6592800	856290	0	5052500	2867600	6422000	1348800	0	0	0	0	0	14780000	4009800000	269720000	61501000	19147000	8255200	10100000	16280000	13158000	2101800	13455000	8185700	8021600	11364000	16050000	3938600	0	0	0	0	0	5661600	0
Q00776	AP-1 complex subunit mu-1-I	APM1	sp|Q00776|AP1M1_YEAST AP-1 complex subunit mu-1-I OS=Saccharomyces cerevisiae (strain ATCC 204508 / S288c) GN=APM1 PE=1 SV=2	1	11	23.2	53.873	475	0	43.837	236900000	0	0	0	0	0	2762800	0	0	2727600	1343300	0	0	0	1039700	1846100	0	0	0	626110	0	0	0	0	3951100	193890000	0	4360700	0	0	0	0	1200200	3673600	0	0	0	2065500	15190000
Q04792	Glutamate decarboxylase	GAD1	sp|Q04792|DCE_YEAST Glutamate decarboxylase OS=Saccharomyces cerevisiae (strain ATCC 204508 / S288c) GN=GAD1 PE=1 SV=1	1	5	10.4	65.989	585	0	18.563	101810000	2245900	0	0	0	0	0	0	0	0	1342400	0	0	0	0	0	0	0	0	0	0	0	49545000	11902000	0	720160	0	0	0	0	0	24125000	9267800	0	1483900	1180000	0	0	0
P38254	Probable tubulin--tyrosine ligase PBY1	PBY1	sp|P38254|TTL_YEAST Probable tubulin--tyrosine ligase PBY1 OS=Saccharomyces cerevisiae (strain ATCC 204508 / S288c) GN=PBY1 PE=1 SV=2	1	13	18.7	86.352	753	0	190.22	329370000	3280300	3273700	1945200	2705500	1724600	19113000	13443000	0	1434700	1283200	0	992290	0	833930	699390	0	220150000	7312000	0	0	24030000	0	280660	2915900	2675000	0	0	0	1910600	1554400	0	3012300	4457200	0	0	0	6883100	3462300
P53915	Nicotinamide riboside kinase	NRK1	sp|P53915|NRK1_YEAST Nicotinamide riboside kinase OS=Saccharomyces cerevisiae (strain ATCC 204508 / S288c) GN=NRK1 PE=1 SV=1	1	6	27.5	27.689	240	0	32.371	214850000	0	343230	0	0	0	0	786230	0	0	1264400	10327000	0	0	0	2508100	2138200	1634600	0	10987000	1929700	0	4622600	0	13184000	9377200	0	0	7683700	0	10230000	0	4054000	127280000	6497800	0	0	0	0
P53333	Pre-mRNA-splicing factor CWC22	CWC22	sp|P53333|CWC22_YEAST Pre-mRNA-splicing factor CWC22 OS=Saccharomyces cerevisiae (strain ATCC 204508 / S288c) GN=CWC22 PE=1 SV=1	1	11	17.9	67.293	577	0	111.28	165690000	0	0	0	0	0	0	0	0	1091700	1258300	0	0	0	0	402920	0	0	0	0	0	5314000	137390000	2465000	16412000	0	0	0	0	0	0	0	1357900	0	0	0	0	0	0
P48240	Exosome complex component MTR3	MTR3	sp|P48240|MTR3_YEAST Exosome complex component MTR3 OS=Saccharomyces cerevisiae (strain ATCC 204508 / S288c) GN=MTR3 PE=1 SV=1	1	2	12	27.577	250	0	35.748	41499000	0	0	0	0	0	0	0	0	0	1240100	1391000	0	0	0	0	0	0	0	0	0	0	0	0	0	0	0	0	0	0	0	0	8583200	27771000	2513900	0	0	0	0
P33750	Protein SOF1	SOF1	sp|P33750|DCA13_YEAST Protein SOF1 OS=Saccharomyces cerevisiae (strain ATCC 204508 / S288c) GN=SOF1 PE=1 SV=1	1	10	24.9	56.788	489	0	163.19	590470000	0	0	0	1755100	0	174300000	0	612420	2867700	1139500	0	0	0	0	0	0	0	8320400	0	1692200	3747000	0	1243600	329180000	3650000	2719200	1958400	0	0	48094000	597720	0	0	0	0	0	0	1807700
P37838	Nucleolar protein 4	NOP4	sp|P37838|NOP4_YEAST Nucleolar protein 4 OS=Saccharomyces cerevisiae (strain ATCC 204508 / S288c) GN=NOP4 PE=1 SV=1	1	30	42.2	77.824	685	0	323.31	3440200000	13690000	0	0	2005400	0	19656000	0	0	0	1136800	283230	380600	1533600	0	7429600	32122000	2855500000	166350000	39918000	16337000	93392000	13443000	16921000	2331500	29404000	13107000	4967300	11438000	16226000	12711000	5306900	11981000	10387000	1009700	6839000	21281000	10927000	1760800
P35193	Autophagy-related protein 19	ATG19	sp|P35193|ATG19_YEAST Autophagy-related protein 19 OS=Saccharomyces cerevisiae (strain ATCC 204508 / S288c) GN=ATG19 PE=1 SV=1	1	5	11.6	47.599	415	0	30.687	164980000	0	0	0	0	0	0	0	0	0	1110300	0	0	0	0	0	2512300	0	627130	0	0	1654700	0	1518200	0	98007000	1518900	0	46473000	1464900	0	3363100	3803100	2744300	0	0	0	0	178380
P46655	Glutamate--tRNA ligase, cytoplasmic	GUS1	sp|P46655|SYEC_YEAST Glutamate--tRNA ligase, cytoplasmic OS=Saccharomyces cerevisiae (strain ATCC 204508 / S288c) GN=GUS1 PE=1 SV=3	1	34	43.8	80.842	708	0	323.31	8573700000	0	0	299750	0	661690	330520	4852300	2522100	4505800	1079200	18821000	0	0	0	20146000	30050000	405030000	4816100000	878490000	93410000	84203000	165590000	291520000	66153000	223000000	89663000	161900000	268860000	155150000	349970000	60806000	78317000	82312000	20123000	33490000	35958000	102620000	17811000
Q03835	Monothiol glutaredoxin-3	GRX3	sp|Q03835|GLRX3_YEAST Monothiol glutaredoxin-3 OS=Saccharomyces cerevisiae (strain ATCC 204508 / S288c) GN=GRX3 PE=1 SV=2	1	4	17.2	28.261	250	0	50.403	479040000	0	0	0	0	0	0	0	0	1720300	1068700	300490	0	0	0	0	0	0	0	0	0	0	306520	0	0	104300000	0	2790800	3958400	0	0	3537600	127320000	47655000	21217000	0	0	96676000	48231000
Q04439	Myosin-5	MYO5	sp|Q04439|MYO5_YEAST Myosin-5 OS=Saccharomyces cerevisiae (strain ATCC 204508 / S288c) GN=MYO5 PE=1 SV=1	1	18	20.8	136.9	1219	0	299.94	737810000	0	0	0	6873800	3483100	5502000	682690	0	0	1051300	2511700	0	0	0	337540000	26187000	12763000	5987200	7321400	9531900	6000100	3928400	193060000	2628800	19903000	2358000	2284300	0	74627000	0	414090	0	0	1654200	1534300	4542900	4362700	0
P38754;P36105	60S ribosomal protein L14-B;60S ribosomal protein L14-A	RPL14B;RPL14A	sp|P38754|RL14B_YEAST 60S ribosomal protein L14-B OS=Saccharomyces cerevisiae (strain ATCC 204508 / S288c) GN=RPL14B PE=1 SV=1;sp|P36105|RL14A_YEAST 60S ribosomal protein L14-A OS=Saccharomyces cerevisiae (strain ATCC 204508 / S288c) GN=RPL14A PE=1 SV=1	2	7	35.5	15.153	138	0	43.587	4357300000	20327000	4187100	23314000	0	0	0	0	0	0	1041100	565490	0	0	24585000	0	739000	0	0	0	757230	0	8017400	6069700	0	4654600	0	3741500	2145800	5482400	3619700	6124300	5196000	13073000	23488000	61683000	132140000	3084500000	558180000
P0CX42;P0CX41	60S ribosomal protein L23-B;60S ribosomal protein L23-A	RPL23B;RPL23A	sp|P0CX42|RL23B_YEAST 60S ribosomal protein L23-B OS=Saccharomyces cerevisiae (strain ATCC 204508 / S288c) GN=RPL23B PE=1 SV=1;sp|P0CX41|RL23A_YEAST 60S ribosomal protein L23-A OS=Saccharomyces cerevisiae (strain ATCC 204508 / S288c) GN=RPL23A PE=1 SV=1	2	6	37.2	14.473	137	0	85.715	9976000000	9775200	1820900000	10605000	0	0	0	0	0	1933000	1033200	2046700	0	5883500	0	1270100	0	1831200	0	1232800	1426900	0	4181200	10302000	2008100	3304700	14358000	1946700	5076800	3939300	0	57076000	10664000	4593600	14016000	41418000	44262000	985510000	6085400000
P15496	Isopentenyl-diphosphate Delta-isomerase	IDI1	sp|P15496|IDI1_YEAST Isopentenyl-diphosphate Delta-isomerase OS=Saccharomyces cerevisiae (strain ATCC 204508 / S288c) GN=IDI1 PE=1 SV=2	1	4	16.3	33.351	288	0	40.085	228610000	0	2133300	0	7180800	11975000	0	13779000	0	4291700	1018500	0	0	0	0	11289000	0	0	3950500	0	0	0	7446400	0	3867100	0	0	0	18895000	70105000	37277000	0	9488500	0	0	7219300	0	12913000	5777700
P32338	Zinc finger protein RME1	RME1	sp|P32338|RME1_YEAST Zinc finger protein RME1 OS=Saccharomyces cerevisiae (strain ATCC 204508 / S288c) GN=RME1 PE=1 SV=1	1	5	17.3	33.904	300	0	93.6	475330000	0	0	0	0	3407600	0	637180	2406200	259030000	984940	0	0	0	0	0	0	0	0	0	0	0	0	0	0	0	0	13852000	33996000	115080000	41689000	0	0	0	0	0	0	0	4241900
P50946	Putative tyrosine-protein phosphatase OCA1	OCA1	sp|P50946|OCA1_YEAST Putative tyrosine-protein phosphatase OCA1 OS=Saccharomyces cerevisiae (strain ATCC 204508 / S288c) GN=OCA1 PE=1 SV=1	1	4	21	27.205	238	0	26.899	244330000	2175400	0	0	0	0	0	0	0	2432600	979000	0	0	0	0	0	0	0	0	0	0	0	0	0	4966400	0	3248700	0	0	0	0	122900000	69220000	2700700	3129800	3532600	25039000	3997500	0
P04449	60S ribosomal protein L24-A	RPL24A	sp|P04449|RL24A_YEAST 60S ribosomal protein L24-A OS=Saccharomyces cerevisiae (strain ATCC 204508 / S288c) GN=RPL24A PE=1 SV=1	1	8	32.3	17.613	155	0	167.91	7987200000	0	1952700	24319000	4972600	4283900	4292000	0	0	3719800	971000	0	405430	663030000	27555000	0	1484800	0	2075400	0	0	939410	26600000	9461600	2670900	7497700	9598000	34363000	26174000	54176000	74218000	90661000	155550000	210780000	184990000	176440000	5595600000	175540000	78107000
Q12486	Putative uncharacterized hydrolase YOR131C		sp|Q12486|YOR31_YEAST Putative uncharacterized hydrolase YOR131C OS=Saccharomyces cerevisiae (strain ATCC 204508 / S288c) GN=YOR131C PE=1 SV=1	1	7	36.2	24.84	218	0	93.589	585980000	0	885400	0	0	0	0	0	0	0	961730	3159200	30454000	457570	0	0	636300	0	0	0	0	0	3624500	12769000	0	0	0	0	0	0	11633000	0	0	10161000	144530000	266940000	12939000	65696000	13942000
Q08601	Metacaspase-1	MCA1	sp|Q08601|MCA1_YEAST Metacaspase-1 OS=Saccharomyces cerevisiae (strain ATCC 204508 / S288c) GN=MCA1 PE=1 SV=2	1	3	8.6	47.982	432	0	12.41	126580000	0	0	0	0	0	1402900	1690500	0	1044200	952190	0	0	585370	679110	646500	0	0	0	0	0	0	0	0	0	62732000	14481000	7117900	742670	535770	0	5438800	7238700	2128000	0	0	479560	11702000	0
P38075	Pyridoxamine 5-phosphate oxidase	PDX3	sp|P38075|PDX3_YEAST Pyridoxamine 5-phosphate oxidase OS=Saccharomyces cerevisiae (strain ATCC 204508 / S288c) GN=PDX3 PE=1 SV=1	1	5	31.6	26.908	228	0	52.292	193740000	0	0	0	0	0	0	0	0	0	915290	0	0	0	0	0	0	0	0	0	1449500	0	0	2267000	0	0	0	0	0	0	12019000	857980	108110000	0	24109000	4221700	13587000	9366400	6731200
P03872	Partitioning protein REP2	REP2	sp|P03872|REP2_YEAST Partitioning protein REP2 OS=Saccharomyces cerevisiae (strain ATCC 204508 / S288c) GN=REP2 PE=1 SV=1	1	8	30.7	33.196	296	0	228.96	701020000	0	0	0	0	0	0	595140	0	72119000	861210	694930	1364000	0	1301600	0	0	0	0	0	0	0	0	0	0	0	2973800	0	302350000	283610000	21506000	4607500	0	0	1384900	4731200	0	1391300	0
P05756	40S ribosomal protein S13	RPS13	sp|P05756|RS13_YEAST 40S ribosomal protein S13 OS=Saccharomyces cerevisiae (strain ATCC 204508 / S288c) GN=RPS13 PE=1 SV=3	1	8	47	17.029	151	0	119	13964000000	464960000	2496000	0	0	0	852950	378770	336150	843160	826570	460500	0	3390000	535520	0	0	20432000	2623900	0	372710	0	0	0	2946300	0	1702700	4082000	2033100	10649000	8591900	44028000	52423000	76936000	70722000	290530000	137130000	11839000000	699690000
P43633	Serine/threonine-protein kinase Haspin homolog ALK1	ALK1	sp|P43633|ALK1_YEAST Serine/threonine-protein kinase Haspin homolog ALK1 OS=Saccharomyces cerevisiae (strain ATCC 204508 / S288c) GN=ALK1 PE=1 SV=2	1	13	19.5	86.086	760	0	121.29	400980000	4843500	3260100	2039100	26698000	13278000	2039500	0	2171200	1943700	824970	0	0	0	0	0	0	91234000	196780000	10939000	8650000	2980900	10002000	5973900	0	5766600	0	2145200	4258000	0	2004000	2377800	0	0	0	0	774140	0	0
P00925	Enolase 2	ENO2	sp|P00925|ENO2_YEAST Enolase 2 OS=Saccharomyces cerevisiae (strain ATCC 204508 / S288c) GN=ENO2 PE=1 SV=2	1	16	39.1	46.914	437	0	323.31	3155100000	3214700	2662400	7348000	21989000	25443000	1902000000	8078700	15297000	22569000	820310	4533200	917840	5471000	3540600	19797000	29754000	11002000	32830000	16849000	6523800	24679000	19936000	398360000	23554000	41049000	70634000	143320000	24169000	26278000	13051000	6066800	8601300	52388000	5595000	24589000	13806000	79510000	5663100
Q02931	NET1-associated nuclear protein 1	NAN1	sp|Q02931|UTP17_YEAST NET1-associated nuclear protein 1 OS=Saccharomyces cerevisiae (strain ATCC 204508 / S288c) GN=NAN1 PE=1 SV=1	1	15	18.8	101.24	896	0	180.53	460590000	0	0	0	150770000	0	8944100	0	0	0	775120	920690	1467700	0	1087300	1529700	5500500	40205000	147630000	70446000	4071500	576950	2133800	1156300	0	623350	0	1860700	0	1310700	7024800	2582700	0	0	0	4209500	979670	0	4775400
P33296	Ubiquitin-conjugating enzyme E2 6	UBC6	sp|P33296|UBC6_YEAST Ubiquitin-conjugating enzyme E2 6 OS=Saccharomyces cerevisiae (strain ATCC 204508 / S288c) GN=UBC6 PE=1 SV=1	1	3	20.4	28.383	250	0	44.92	46575000	0	0	0	0	0	1246600	0	0	0	764140	0	0	0	0	0	0	0	0	0	0	0	0	0	0	0	0	0	0	0	0	30273000	9905600	1200900	3184600	0	0	0	0
P32787	Mitochondrial genome maintenance protein MGM101	MGM101	sp|P32787|MG101_YEAST Mitochondrial genome maintenance protein MGM101 OS=Saccharomyces cerevisiae (strain ATCC 204508 / S288c) GN=MGM101 PE=1 SV=1	1	7	29.4	30.09	269	0	148.16	219000000	0	0	0	0	0	0	0	0	0	711770	0	0	0	0	0	0	0	0	0	0	0	0	0	0	0	0	0	0	0	0	184880000	26162000	7244900	0	0	0	0	0
P09232	Cerevisin	PRB1	sp|P09232|PRTB_YEAST Cerevisin OS=Saccharomyces cerevisiae (strain ATCC 204508 / S288c) GN=PRB1 PE=1 SV=1	1	7	12.6	69.621	635	0	134.56	946750000	0	0	0	0	0	0	0	0	0	665840	0	0	0	0	2949400	1452200	0	3477500	4714400	26540000	0	0	1960100	1227500	0	14379000	4777300	10621000	21356000	8804100	488930000	288420000	22850000	11991000	1792900	983540	25015000	2174600
P53981	Uncharacterized phosphatase YNL010W		sp|P53981|YNB0_YEAST Uncharacterized phosphatase YNL010W OS=Saccharomyces cerevisiae (strain ATCC 204508 / S288c) GN=YNL010W PE=1 SV=1	1	5	21.2	27.48	241	0	19.033	253500000	0	0	0	0	0	4028300	0	0	0	662850	14471000	0	2587600	0	1851800	0	0	0	0	0	0	0	0	0	0	0	0	3264700	10201000	6167700	0	2209200	188390000	5974700	0	8162700	4437900	1086000
P53271	Conserved oligomeric Golgi complex subunit 2	COG2	sp|P53271|COG2_YEAST Conserved oligomeric Golgi complex subunit 2 OS=Saccharomyces cerevisiae (strain ATCC 204508 / S288c) GN=COG2 PE=1 SV=2	1	5	20.6	30.325	262	0	150.54	316590000	0	0	0	0	0	0	0	0	0	658070	0	0	0	0	0	0	4707700	6868900	4399800	0	0	0	0	0	5492300	0	0	4144700	0	0	254320000	32204000	2105400	1695200	0	0	0	0
P28263	Ubiquitin-conjugating enzyme E2-24 kDa	UBC8	sp|P28263|UBC8_YEAST Ubiquitin-conjugating enzyme E2-24 kDa OS=Saccharomyces cerevisiae (strain ATCC 204508 / S288c) GN=UBC8 PE=1 SV=2	1	4	22.9	24.633	218	0	39.478	203440000	0	0	0	2390000	0	0	0	0	0	653720	1330000	4696900	596840	0	0	0	0	0	1820800	0	0	895940	0	0	0	0	0	0	0	0	0	1171800	151030000	7901000	0	0	19567000	5152900
P12385	Eukaryotic peptide chain release factor subunit 1	SUP45	sp|P12385|ERF1_YEAST Eukaryotic peptide chain release factor subunit 1 OS=Saccharomyces cerevisiae (strain ATCC 204508 / S288c) GN=SUP45 PE=1 SV=2	1	16	34.8	49.005	437	0	209.98	3115700000	765210	1368000	0	0	0	13956000	2136100	7421400	16640000	644000	0	1233200	7013900	629560	6528200	8627700	0	0	4046300	2673200	5728200	7515500	14120000	10454000	504400000	205630000	332660000	207560000	220170000	141700000	150990000	130250000	142270000	143390000	140810000	63081000	56906000	98965000
P32598	Serine/threonine-protein phosphatase PP1-2	GLC7	sp|P32598|PP12_YEAST Serine/threonine-protein phosphatase PP1-2 OS=Saccharomyces cerevisiae (strain ATCC 204508 / S288c) GN=GLC7 PE=1 SV=1	1	6	21.2	35.907	312	0	323.31	1591400000	2384700	0	0	0	0	0	1202600	0	136330000	525760	0	0	0	0	0	0	5646800	1345700	0	2098500	0	2089200	0	0	0	1721100	6901600	6802900	532690000	846120000	8306500	17181000	1104600	1163700	0	0	5682500	748290
Q04299	Probable ADP-ribose 1-phosphate phosphatase YML087W		sp|Q04299|YMX7_YEAST Probable ADP-ribose 1-phosphate phosphatase YML087W OS=Saccharomyces cerevisiae (strain ATCC 204508 / S288c) GN=YMR087W PE=1 SV=1	1	7	22.9	32.067	284	0	122.56	636200000	14062000	0	0	0	0	0	0	0	0	480470	0	0	0	298660	0	5429400	0	0	63008000	0	17807000	0	0	2579300	0	0	0	0	0	0	203530000	251720000	2155400	0	2320500	6037200	62675000	0
P36169	Suppressor of lethality of KEX2 GAS1 double null mutant protein 1	SKG1	sp|P36169|SKG1_YEAST Suppressor of lethality of KEX2 GAS1 double null mutant protein 1 OS=Saccharomyces cerevisiae (strain ATCC 204508 / S288c) GN=SKG1 PE=1 SV=2	1	3	9.9	39.829	355	0	6.0723	46314000	10005000	1408300	1036900	0	0	0	0	0	0	474610	599910	0	0	0	0	0	0	0	0	0	422570	0	665930	0	663590	0	723340	0	0	0	0	0	0	0	0	0	28863000	1449800
P38934	Nuclear segregation protein BFR1	BFR1	sp|P38934|BFR1_YEAST Nuclear segregation protein BFR1 OS=Saccharomyces cerevisiae (strain ATCC 204508 / S288c) GN=BFR1 PE=1 SV=1	1	13	27.4	54.639	470	0	151.69	271050000	0	7252100	0	0	0	0	54144000	0	524200	468630	0	0	0	192090	0	0	0	0	0	0	669670	0	186890000	3856700	0	762640	2628800	7211500	2240300	0	0	0	0	0	0	0	0	4211500
P53741	UBP3-associated protein BRE5	BRE5	sp|P53741|BRE5_YEAST UBP3-associated protein BRE5 OS=Saccharomyces cerevisiae (strain ATCC 204508 / S288c) GN=BRE5 PE=1 SV=1	1	2	6.4	57.673	515	0	6.7839	42546000	0	0	0	0	0	0	0	0	0	468520	0	0	0	0	0	0	0	0	0	0	26208000	0	0	0	1503000	0	0	1334500	2515000	4127300	0	6389900	0	0	0	0	0	0
Q07844	Ribosome biogenesis ATPase RIX7	RIX7	sp|Q07844|RIX7_YEAST Ribosome biogenesis ATPase RIX7 OS=Saccharomyces cerevisiae (strain ATCC 204508 / S288c) GN=RIX7 PE=1 SV=1	1	21	26.2	93.068	837	0	155.18	835830000	0	9553700	0	1006800	4574200	0	17027000	0	11870000	373970	0	0	1541700	0	0	557260000	1868000	1728200	2894100	5116900	10032000	4722100	10460000	2618400	3971800	3267500	8403000	1505500	53397000	29022000	0	3595500	78894000	1061300	0	7643300	1227300	440010
P39707	tRNA-splicing endonuclease subunit SEN34	SEN34	sp|P39707|SEN34_YEAST tRNA-splicing endonuclease subunit SEN34 OS=Saccharomyces cerevisiae (strain ATCC 204508 / S288c) GN=SEN34 PE=1 SV=1	1	3	9.8	31.313	275	0	4.9769	28923000	0	0	0	0	0	0	0	0	643330	325090	0	0	0	0	0	0	0	0	0	0	0	0	0	0	390460	0	0	0	0	25436000	0	0	0	0	0	0	0	0
P25294	Protein SIS1	SIS1	sp|P25294|SIS1_YEAST Protein SIS1 OS=Saccharomyces cerevisiae (strain ATCC 204508 / S288c) GN=SIS1 PE=1 SV=1	1	19	44.9	37.59	352	0	323.31	3092400000	435800	685410	1708400	1063400	2314800	3264800	1212500	676420000	8063000	311100	10451000	0	0	8226600	0	10401000	2344100	0	0	0	2153200	0	1883500	5832500	3470300	1971400000	16581000	2342700	5750500	13498000	10756000	75447000	144160000	86573000	4149700	4944800	10117000	688600
P03962	Orotidine 5-phosphate decarboxylase	URA3	sp|P03962|PYRF_YEAST Orotidine 5-phosphate decarboxylase OS=Saccharomyces cerevisiae (strain ATCC 204508 / S288c) GN=URA3 PE=1 SV=2	1	6	21.3	29.239	267	0	19.251	252440000	0	0	0	0	0	65751000	0	0	1059500	305940	0	0	0	0	0	0	0	366800	0	0	0	10105000	0	0	0	5260500	4977500	0	1579700	0	91073000	71627000	0	0	0	0	0	0
Q12415	Transcription factor tau 55 kDa subunit	TFC7	sp|Q12415|TFC7_YEAST Transcription factor tau 55 kDa subunit OS=Saccharomyces cerevisiae (strain ATCC 204508 / S288c) GN=TFC7 PE=1 SV=1	1	9	26.9	49.146	435	0	146.28	154940000	0	0	0	0	0	986610	0	0	0	175650	0	0	0	0	0	0	0	0	0	0	0	0	0	0	135890000	0	0	0	0	0	0	0	0	3659300	14233000	0	0	0
P0CX44;P0CX43	60S ribosomal protein L1-B;60S ribosomal protein L1-A	RPL1B;RPL1A	sp|P0CX44|RL1B_YEAST 60S ribosomal protein L1-B OS=Saccharomyces cerevisiae (strain ATCC 204508 / S288c) GN=RPL1B PE=1 SV=1;sp|P0CX43|RL1A_YEAST 60S ribosomal protein L1-A OS=Saccharomyces cerevisiae (strain ATCC 204508 / S288c) GN=RPL1A PE=1 SV=1	2	8	28.6	24.485	217	0	188.89	2434800000	0	0	0	0	0	0	0	0	0	174140	0	111620000	0	0	4407100	0	0	0	0	0	32793000	0	19217000	0	1056900	0	4968800	12870000	4568900	11506000	115270000	126470000	352570000	494370000	1014800000	68235000	18687000	41141000
P46990	60S ribosomal protein L17-B	RPL17B	sp|P46990|RL17B_YEAST 60S ribosomal protein L17-B OS=Saccharomyces cerevisiae (strain ATCC 204508 / S288c) GN=RPL17B PE=1 SV=2	1	11	51.1	20.551	184	0	323.31	10251000000	0	2448700	227500	4513300	0	0	1669600	0	0	0	1516600	941220	4637300	0	0	0	0	0	0	0	715630	0	15887000	1611200	27375000	2825900	31118000	23109000	52130000	101360000	198160000	323590000	704620000	406450000	7338800000	295270000	250260000	50317000
Q12447	Polyamine N-acetyltransferase 1	PAA1	sp|Q12447|PAA1_YEAST Polyamine N-acetyltransferase 1 OS=Saccharomyces cerevisiae (strain ATCC 204508 / S288c) GN=PAA1 PE=1 SV=1	1	14	78.5	21.947	191	0	323.31	6199800000	1585900	2327400	1300900	1424400	0	1682300	2651200	1377900	1955400	0	0	485760	2027400	3660700	2595700	0	0	1750300	0	1668500	0	0	0	6681100	0	1829600	1927400	2637800	2291100	1554300	736530	1241800	0	1902800	5836600000	194230000	46835000	10602000
P36015	Synaptobrevin homolog YKT6	YKT6	sp|P36015|YKT6_YEAST Synaptobrevin homolog YKT6 OS=Saccharomyces cerevisiae (strain ATCC 204508 / S288c) GN=YKT6 PE=1 SV=1	1	15	74.5	22.707	200	0	323.31	3019600000	971200	0	595590	0	0	0	0	0	0	0	1139100	9033600	1001200	1103700	0	2464800	0	2729300	0	0	0	0	0	1087400	0	0	4425100	9653800	0	8211100	1752300	0	0	2512900	2747100000	57017000	88670000	54447000
Q02326	60S ribosomal protein L6-A	RPL6A	sp|Q02326|RL6A_YEAST 60S ribosomal protein L6-A OS=Saccharomyces cerevisiae (strain ATCC 204508 / S288c) GN=RPL6A PE=1 SV=2	1	9	44.9	19.961	176	0	254.07	3654700000	0	2818200	0	0	0	1870900	11528000	0	1359300	0	0	0	0	0	0	0	0	0	0	0	554990	0	1756700	74796000	1144200	0	6168300	0	4150900	0	0	8590300	64694000	142930000	2500000000	214190000	274520000	82572000
P05740	60S ribosomal protein L17-A	RPL17A	sp|P05740|RL17A_YEAST 60S ribosomal protein L17-A OS=Saccharomyces cerevisiae (strain ATCC 204508 / S288c) GN=RPL17A PE=1 SV=4	1	11	51.1	20.549	184	0	51.539	2951100000	0	0	0	3373700	0	0	1670900	0	0	0	0	0	0	0	0	0	0	0	0	0	0	0	0	0	0	27299000	14058000	0	14637000	9456800	58852000	110090000	150990000	93068000	2115900000	93266000	120050000	4515700
P0CX50;P0CX49	60S ribosomal protein L18-B;60S ribosomal protein L18-A	RPL18B;RPL18A	sp|P0CX50|RL18B_YEAST 60S ribosomal protein L18-B OS=Saccharomyces cerevisiae (strain ATCC 204508 / S288c) GN=RPL18B PE=1 SV=1;sp|P0CX49|RL18A_YEAST 60S ribosomal protein L18-A OS=Saccharomyces cerevisiae (strain ATCC 204508 / S288c) GN=RPL18A PE=1 SV=1	2	6	28.5	20.563	186	0	61.984	3208200000	0	848770	0	0	611700	0	2505500	184510000	9917000	0	0	2423200	913890	480450	3863600	3196900	0	0	0	475820	1982300	1318000	0	3999600	4315900	45090000	85478000	48284000	49393000	71361000	46507000	58005000	42806000	47834000	1987000000	76930000	226490000	107090000
P05739	60S ribosomal protein L6-B	RPL6B	sp|P05739|RL6B_YEAST 60S ribosomal protein L6-B OS=Saccharomyces cerevisiae (strain ATCC 204508 / S288c) GN=RPL6B PE=1 SV=4	1	9	48.3	19.986	176	0	166.94	2307100000	0	0	0	0	0	0	0	0	0	0	0	0	0	608980	1416100	0	0	0	0	0	0	0	0	0	0	0	4067900	11119000	5521700	2652900	0	4175300	39515000	80926000	1792500000	97217000	141360000	23452000
P26785	60S ribosomal protein L16-B	RPL16B	sp|P26785|RL16B_YEAST 60S ribosomal protein L16-B OS=Saccharomyces cerevisiae (strain ATCC 204508 / S288c) GN=RPL16B PE=1 SV=3	1	11	40.9	22.249	198	0	192.47	2362500000	0	0	0	0	0	0	0	0	0	0	0	0	4280300	0	0	0	0	0	0	0	0	0	22041000	0	2166600	24307000	41888000	25254000	21328000	44960000	40461000	32780000	24220000	20229000	1786500000	83651000	62262000	62153000
P07560	Ras-related protein SEC4	SEC4	sp|P07560|SEC4_YEAST Ras-related protein SEC4 OS=Saccharomyces cerevisiae (strain ATCC 204508 / S288c) GN=SEC4 PE=1 SV=1	1	8	45.1	23.505	215	0	323.31	1986300000	0	0	0	0	0	0	0	0	0	0	0	4890800	961080	0	2776100	0	0	0	0	0	0	0	0	0	0	0	0	0	0	0	0	7145800	11532000	135640000	1358600000	92280000	120290000	136020000
P01123	GTP-binding protein YPT1	YPT1	sp|P01123|YPT1_YEAST GTP-binding protein YPT1 OS=Saccharomyces cerevisiae (strain ATCC 204508 / S288c) GN=YPT1 PE=1 SV=2	1	9	52.9	23.214	206	0	296.9	1482400000	0	0	0	0	0	0	7288000	1243200	0	0	2475200	0	1057300	0	0	0	0	0	0	0	1765900	0	764180	0	0	3035900	0	3491200	13942000	1773500	0	0	2413600	1854200	972260000	130990000	208180000	67967000
P38828	Protein LSM12	LSM12	sp|P38828|LSM12_YEAST Protein LSM12 OS=Saccharomyces cerevisiae (strain ATCC 204508 / S288c) GN=LSM12 PE=1 SV=1	1	10	49.2	21.313	187	0	323.31	929510000	0	0	0	0	0	825200	0	0	0	0	0	0	0	0	9845400	0	0	0	4680300	0	17958000	6526100	0	0	0	0	0	0	0	7592000	0	0	0	0	872450000	2826800	6805000	0
Q12335	Protoplast secreted protein 2	PST2	sp|Q12335|PST2_YEAST Protoplast secreted protein 2 OS=Saccharomyces cerevisiae (strain ATCC 204508 / S288c) GN=PST2 PE=1 SV=1	1	6	43.9	20.965	198	0	323.31	1438300000	0	0	0	0	0	0	0	0	4527700	0	0	0	4003200	0	0	0	0	0	0	0	0	1625600	0	0	0	0	0	0	44611000	0	1722400	0	0	0	833210000	248650000	68180000	187280000
P05738	60S ribosomal protein L9-A	RPL9A	sp|P05738|RL9A_YEAST 60S ribosomal protein L9-A OS=Saccharomyces cerevisiae (strain ATCC 204508 / S288c) GN=RPL9A PE=1 SV=2	1	11	53.4	21.569	191	0	69.507	806590000	0	0	0	0	0	0	963980	0	897460	0	0	0	0	0	0	0	0	0	0	0	0	0	0	0	0	0	2935900	1020100	0	0	0	5925900	45478000	4781100	744590000	0	0	0
P32836;P32835	GTP-binding nuclear protein GSP2/CNR2;GTP-binding nuclear protein GSP1/CNR1	GSP2;GSP1	sp|P32836|GSP2_YEAST GTP-binding nuclear protein GSP2/CNR2 OS=Saccharomyces cerevisiae (strain ATCC 204508 / S288c) GN=GSP2 PE=1 SV=1;sp|P32835|GSP1_YEAST GTP-binding nuclear protein GSP1/CNR1 OS=Saccharomyces cerevisiae (strain ATCC 204508 / S288c) GN=GSP	2	8	34.1	24.99	220	0	105.18	6558800000	1941900	3082200	1926600	0	1352500	0	6468000	0	0	0	0	0	0	1319500	8547400	6502900	5518700	1909100	1753900	3366900	5447000	4221200	4305800	11268000	3432500	5416500	126680000	6005900	13142000	25798000	108930000	1992600000	1148600000	610090000	685060000	461710000	550990000	354170000
P18562	Uracil phosphoribosyltransferase	FUR1	sp|P18562|UPP_YEAST Uracil phosphoribosyltransferase OS=Saccharomyces cerevisiae (strain ATCC 204508 / S288c) GN=FUR1 PE=1 SV=2	1	7	33.3	24.594	216	0	96.687	672690000	82460000	0	0	6826600	0	5005100	0	0	0	0	0	3011500	0	0	0	0	0	0	0	0	0	0	0	0	5121700	0	0	0	0	0	0	676610	6149900	34320000	446480000	3924200	52345000	8366400
P32899	U3 small nucleolar ribonucleoprotein protein IMP3	IMP3	sp|P32899|IMP3_YEAST U3 small nucleolar ribonucleoprotein protein IMP3 OS=Saccharomyces cerevisiae (strain ATCC 204508 / S288c) GN=IMP3 PE=1 SV=1	1	12	54.6	21.885	183	0	231.57	993460000	0	3864000	2745700	0	0	2707700	0	0	0	0	0	0	34048000	4330700	0	0	7211100	0	0	0	17348000	654200	0	0	4619900	0	0	0	0	1375200	0	3918300	23196000	58275000	439300000	359760000	27315000	0
Q12690;P40212	60S ribosomal protein L13-A;60S ribosomal protein L13-B	RPL13A;RPL13B	sp|Q12690|RL13A_YEAST 60S ribosomal protein L13-A OS=Saccharomyces cerevisiae (strain ATCC 204508 / S288c) GN=RPL13A PE=1 SV=1;sp|P40212|RL13B_YEAST 60S ribosomal protein L13-B OS=Saccharomyces cerevisiae (strain ATCC 204508 / S288c) GN=RPL13B PE=1 SV=1	2	9	48.7	22.554	199	0	218.65	9202300000	3482000	2761900	7096800	0	810150	5841200	2292700	489940	6312100	0	329110000	227190	0	976090	0	491170	0	0	1984900	2645300	0	0	8614700	25033000	0	102410000	154880000	100340000	116840000	154890000	218440000	222970000	3064400000	426400000	436140000	410820000	3023600000	117970000
P0CX24;P0CX23	60S ribosomal protein L20-B;60S ribosomal protein L20-A	RPL20B;RPL20A	sp|P0CX24|RL20B_YEAST 60S ribosomal protein L20-B OS=Saccharomyces cerevisiae (strain ATCC 204508 / S288c) GN=RPL20B PE=1 SV=1;sp|P0CX23|RL20A_YEAST 60S ribosomal protein L20-A OS=Saccharomyces cerevisiae (strain ATCC 204508 / S288c) GN=RPL20A PE=1 SV=1	2	10	48.8	20.437	172	0	175.22	8401000000	0	0	0	0	405910000	0	800340	0	0	0	0	0	439650000	0	0	0	0	0	0	0	25467000	50260000	11555000	9781300	3983800	59190000	51288000	16641000	48239000	73617000	141190000	303000000	351700000	277400000	338950000	5274100000	385260000	84851000
P15992	Heat shock protein 26	HSP26	sp|P15992|HSP26_YEAST Heat shock protein 26 OS=Saccharomyces cerevisiae (strain ATCC 204508 / S288c) GN=HSP26 PE=1 SV=3	1	17	60.7	23.879	214	0	323.31	57065000000	0	0	313430	0	0	0	0	2055900	791710	0	302670000	0	1308900	190860	0	909940	588750	0	789350	269940	0	0	2710100	2250800	21014000	0	6780500	3098400	4343200	27149000	28795000	428500000	52022000000	1664300000	324330000	390800000	1541600000	112550000
P13298;P30402	Orotate phosphoribosyltransferase 1	URA5	sp|P13298|PYRE_YEAST Orotate phosphoribosyltransferase 1 OS=Saccharomyces cerevisiae (strain ATCC 204508 / S288c) GN=URA5 PE=1 SV=2	2	7	40.7	24.664	226	0	242.89	287200000	0	0	0	0	1003000	5593600	0	0	0	0	0	0	0	0	4023900	0	0	0	0	0	0	0	0	0	0	0	0	0	0	0	0	0	0	0	266380000	6616800	2196900	0
P38624	Proteasome subunit beta type-1	PRE3	sp|P38624|PSB1_YEAST Proteasome subunit beta type-1 OS=Saccharomyces cerevisiae (strain ATCC 204508 / S288c) GN=PRE3 PE=1 SV=2	1	8	37.2	23.547	215	0	26.822	331290000	0	0	0	0	0	0	0	0	0	0	0	0	462480	0	0	0	0	0	0	0	763420	0	0	0	1701200	0	0	0	4644400	0	0	22407000	0	0	263800000	37319000	0	0
P0CX48;P0CX47	40S ribosomal protein S11-B;40S ribosomal protein S11-A	RPS11B;RPS11A	sp|P0CX48|RS11B_YEAST 40S ribosomal protein S11-B OS=Saccharomyces cerevisiae (strain ATCC 204508 / S288c) GN=RPS11B PE=1 SV=1;sp|P0CX47|RS11A_YEAST 40S ribosomal protein S11-A OS=Saccharomyces cerevisiae (strain ATCC 204508 / S288c) GN=RPS11A PE=1 SV=1	2	8	38.5	17.749	156	0	90.266	9821100000	2549200	0	0	0	5479000	0	0	0	0	0	0	3628500	796230000	0	21463000	19725000	0	3156900	1553700	3890600	5060500	9432700	29107000	17094000	9219400	40250000	65904000	79980000	107900000	131340000	62700000	136190000	37284000	82509000	259140000	6124400000	1297400000	292290000
P53538	RNA polymerase II subunit A C-terminal domain phosphatase SSU72	SSU72	sp|P53538|SSU72_YEAST RNA polymerase II subunit A C-terminal domain phosphatase SSU72 OS=Saccharomyces cerevisiae (strain ATCC 204508 / S288c) GN=SSU72 PE=1 SV=1	1	3	23.3	23.469	206	0	204.28	264600000	0	0	0	0	0	0	0	0	0	0	0	0	0	0	2046500	0	0	0	0	0	0	0	0	0	0	0	0	0	0	0	0	0	0	0	256090000	5861500	605460	0
P39959	Zinc finger protein YER130C	YER130C	sp|P39959|YEW0_YEAST Zinc finger protein YER130C OS=Saccharomyces cerevisiae (strain ATCC 204508 / S288c) GN=YER130C PE=3 SV=2	1	6	11.3	50.319	443	0	12.82	388230000	0	0	0	0	0	0	0	0	673130	0	0	0	0	0	183900	0	0	0	0	0	5402200	1214300	92848000	11024000	425460	1942800	1981100	0	0	2088100	0	0	0	0	252540000	0	17916000	0
P53600	Coatomer subunit zeta	RET3	sp|P53600|COPZ_YEAST Coatomer subunit zeta OS=Saccharomyces cerevisiae (strain ATCC 204508 / S288c) GN=RET3 PE=1 SV=1	1	5	31.7	21.687	189	0	148.76	312550000	0	0	0	0	0	0	4328200	0	0	0	0	0	0	0	2995300	0	0	0	0	0	0	0	0	0	0	0	0	0	0	0	0	0	0	0	246410000	52280000	6051600	489740
P41940	Mannose-1-phosphate guanyltransferase	PSA1	sp|P41940|MPG1_YEAST Mannose-1-phosphate guanyltransferase OS=Saccharomyces cerevisiae (strain ATCC 204508 / S288c) GN=PSA1 PE=1 SV=2	1	16	51.8	39.565	361	0	323.31	14580000000	0	0	0	0	949090	1510000	1031600	319650000	3136700	0	0	0	1529400	0	5302000	4185100	4164300	2003700	6111100	4305600	6539700	21609000	7608500	0	8017800	11463000000	868150000	93577000	66415000	54098000	175880000	294950000	78076000	246310000	200610000	116600000	176930000	205420000
P32495	H/ACA ribonucleoprotein complex subunit 2	NHP2	sp|P32495|NHP2_YEAST H/ACA ribonucleoprotein complex subunit 2 OS=Saccharomyces cerevisiae (strain ATCC 204508 / S288c) GN=NHP2 PE=1 SV=2	1	3	18.6	17.122	156	0	19.602	353900000	0	0	0	0	0	0	0	0	0	0	0	0	52736000	0	0	0	0	0	0	0	0	0	0	0	0	0	0	0	9554800	0	1211500	3722600	19938000	31789000	172410000	58296000	4237500	0
P40958	Mitotic spindle checkpoint component MAD2	MAD2	sp|P40958|MAD2_YEAST Mitotic spindle checkpoint component MAD2 OS=Saccharomyces cerevisiae (strain ATCC 204508 / S288c) GN=MAD2 PE=1 SV=1	1	6	32.1	22.284	196	0	60.251	239670000	856160	1196100	1056300	0	0	0	0	0	0	0	9879800	0	0	481770	0	0	10674000	14579000	0	0	0	0	0	0	0	0	0	679780	0	0	0	0	0	23310000	155380000	8895300	11400000	0
P32527	Zuotin	ZUO1	sp|P32527|ZUO1_YEAST Zuotin OS=Saccharomyces cerevisiae (strain ATCC 204508 / S288c) GN=ZUO1 PE=1 SV=1	1	16	36.5	49.019	433	0	323.31	8616400000	0	0	0	0	0	3467700	0	1364400	0	0	0	0	0	0	8345600	2288700	432500	1464500	0	2595000	2321300	10458000	32684000	6060300000	178770000	28038000	389540000	651060000	147560000	87802000	53133000	114810000	215440000	56580000	153280000	65473000	51781000	52968000
Q02804	ADP-ribosylation factor-like protein 3	ARL3	sp|Q02804|ARL3_YEAST ADP-ribosylation factor-like protein 3 OS=Saccharomyces cerevisiae (strain ATCC 204508 / S288c) GN=ARL3 PE=1 SV=1	1	5	32.8	22.782	198	0	80.207	164550000	0	0	0	0	0	0	0	0	0	0	0	0	0	0	0	0	0	0	0	0	0	0	0	0	0	0	0	0	1250300	0	0	3138600	0	0	152570000	0	7588100	0
Q01855	40S ribosomal protein S15	RPS15	sp|Q01855|RS15_YEAST 40S ribosomal protein S15 OS=Saccharomyces cerevisiae (strain ATCC 204508 / S288c) GN=RPS15 PE=1 SV=1	1	4	29.6	16.002	142	0	43.081	5313600000	78386000	2576300	1593100	0	0	0	1503300	0	0	0	0	0	606960	0	0	0	0	166430	20990000	0	0	0	0	0	0	0	0	0	0	0	921900	12639000	25132000	34988000	143040000	87501000	4586400000	212350000
P0CY07;P0CY06	Silenced mating-type protein ALPHA1;Mating-type protein ALPHA1	HMLALPHA1;MATALPHA1	sp|P0CY07|HMAL1_YEAST Silenced mating-type protein ALPHA1 OS=Saccharomyces cerevisiae (strain ATCC 204508 / S288c) GN=HMLALPHA1 PE=3 SV=1;sp|P0CY06|MTAL1_YEAST Mating-type protein ALPHA1 OS=Saccharomyces cerevisiae (strain ATCC 204508 / S288c) GN=MATALPHA1	2	4	26.3	20.413	175	0	129.38	1383600000	0	0	0	0	0	0	0	0	0	0	0	0	125170000	0	0	0	0	0	0	0	0	0	0	0	0	0	0	0	0	1689400	2739600	5554100	11223000	38786000	141530000	1041700000	5949000	4027300
P00447	Superoxide dismutase [Mn], mitochondrial	SOD2	sp|P00447|SODM_YEAST Superoxide dismutase [Mn], mitochondrial OS=Saccharomyces cerevisiae (strain ATCC 204508 / S288c) GN=SOD2 PE=1 SV=1	1	5	22.7	25.774	233	0	65.398	196930000	0	0	0	0	0	0	0	0	0	0	0	0	0	0	0	0	0	0	0	0	579170	0	0	0	0	0	0	0	0	0	3554600	722860	5590300	31459000	136370000	10069000	2199900	3452100
P38801	Exosome complex protein LRP1	LRP1	sp|P38801|LRP1_YEAST Exosome complex protein LRP1 OS=Saccharomyces cerevisiae (strain ATCC 204508 / S288c) GN=LRP1 PE=1 SV=1	1	4	25.5	21.045	184	0	53.315	204920000	0	0	0	0	0	0	0	17692000	0	0	0	0	0	0	0	0	0	0	0	0	35880000	0	0	0	0	0	0	0	0	0	0	0	15277000	0	136070000	0	0	0
P06168	Ketol-acid reductoisomerase, mitochondrial	ILV5	sp|P06168|ILV5_YEAST Ketol-acid reductoisomerase, mitochondrial OS=Saccharomyces cerevisiae (strain ATCC 204508 / S288c) GN=ILV5 PE=1 SV=1	1	16	45.8	44.368	395	0	323.31	3501500000	0	0	871930	0	0	1144000	13200000	5590700	0	0	0	0	0	0	0	2110200	0	0	2997200	0	3905800	2156800	8378400	128000000	0	16522000	2813900000	191650000	18996000	15108000	0	20219000	1943400	27339000	127110000	4365200	46570000	29074000
Q12035	rRNA-processing protein FCF2	FCF2	sp|Q12035|FCF2_YEAST rRNA-processing protein FCF2 OS=Saccharomyces cerevisiae (strain ATCC 204508 / S288c) GN=FCF2 PE=1 SV=1	1	15	50.2	25.636	217	0	323.31	4021200000	0	4573400	23555000	18990000	1143100	13493000	0	36102000	747290	0	0	0	0	1263900	2036700	9552400	3204900	0	6679400	0	10758000	36484000	660930	0	1485600	487560000	314650000	78439000	42729000	3739200	2587700000	63310000	36130000	45897000	126950000	11666000	35673000	7031300
P36531	54S ribosomal protein L36, mitochondrial	MRPL36	sp|P36531|RM36_YEAST 54S ribosomal protein L36, mitochondrial OS=Saccharomyces cerevisiae (strain ATCC 204508 / S288c) GN=MRPL36 PE=1 SV=3	1	4	27.1	20.09	177	0	57.074	144420000	0	0	0	1606900	0	0	0	0	0	0	0	0	0	0	0	0	0	0	0	0	0	0	0	0	0	0	0	0	4361800	0	0	0	2290100	0	124220000	0	1980000	0
P22141	Proteasome subunit beta type-4	PRE1	sp|P22141|PSB4_YEAST Proteasome subunit beta type-4 OS=Saccharomyces cerevisiae (strain ATCC 204508 / S288c) GN=PRE1 PE=1 SV=2	1	6	35.4	22.516	198	0	98.926	824140000	0	0	0	0	0	0	0	0	3321600	0	0	747580	10997000	0	0	2354900	4700000	0	0	0	0	1809500	0	4015300	0	0	0	0	0	0	0	0	4249600	0	123750000	562470000	37994000	42851000
P08067	Cytochrome b-c1 complex subunit Rieske, mitochondrial	RIP1	sp|P08067|UCRI_YEAST Cytochrome b-c1 complex subunit Rieske, mitochondrial OS=Saccharomyces cerevisiae (strain ATCC 204508 / S288c) GN=RIP1 PE=1 SV=1	1	3	14	23.365	215	0	24.505	141250000	0	2021900	590530	0	0	0	0	0	0	0	0	0	0	0	0	0	0	0	0	0	0	0	0	0	0	0	0	0	0	0	0	1522600	1167100	3948700	121530000	5644800	4826800	0
Q02196	Adenylyl-sulfate kinase	MET14	sp|Q02196|KAPS_YEAST Adenylyl-sulfate kinase OS=Saccharomyces cerevisiae (strain ATCC 204508 / S288c) GN=MET14 PE=1 SV=1	1	3	17.3	23.06	202	0	37.592	117960000	0	0	0	0	0	0	0	0	0	0	0	0	0	0	0	0	0	0	0	0	0	0	0	4274900	0	0	0	0	0	0	0	0	0	0	113680000	0	0	0
Q08687	Translation machinery-associated protein 16	TMA16	sp|Q08687|TMA16_YEAST Translation machinery-associated protein 16 OS=Saccharomyces cerevisiae (strain ATCC 204508 / S288c) GN=TMA16 PE=1 SV=2	1	4	23.6	20.839	178	0	20.589	283500000	0	0	0	22993000	0	0	0	5817900	78134000	0	2336400	0	0	0	3580900	1047600	0	0	0	4822000	0	0	0	0	0	0	0	0	0	0	1740500	49063000	0	0	108820000	1656300	0	0
Q12488	DNA replication complex GINS protein PSF1	PSF1	sp|Q12488|PSF1_YEAST DNA replication complex GINS protein PSF1 OS=Saccharomyces cerevisiae (strain ATCC 204508 / S288c) GN=PSF1 PE=1 SV=1	1	5	26.9	24.203	208	0	143.01	113410000	0	0	0	0	0	0	0	0	0	0	0	0	0	0	0	0	0	0	0	0	0	0	0	0	0	0	0	1472700	0	0	0	0	0	0	107250000	3025900	0	0
P38788	Ribosome-associated complex subunit SSZ1	SSZ1	sp|P38788|SSZ1_YEAST Ribosome-associated complex subunit SSZ1 OS=Saccharomyces cerevisiae (strain ATCC 204508 / S288c) GN=SSZ1 PE=1 SV=2	1	27	65.1	58.237	538	0	323.31	22124000000	9932800	2864000	2705700	2020700	0	4208100	3992100	0	1502000	0	0	3797500	0	1027600	7055400	2045800	4207200	4024700	5357500	21930000	59454000	18472000000	179700000	83375000	345880000	27143000	83082000	124490000	389920000	1002400000	224010000	337450000	253680000	258960000	106600000	42673000	24928000	8710400
Q08962	60S ribosome subunit biogenesis protein NIP7	NIP7	sp|Q08962|NIP7_YEAST 60S ribosome subunit biogenesis protein NIP7 OS=Saccharomyces cerevisiae (strain ATCC 204508 / S288c) GN=NIP7 PE=1 SV=1	1	8	39.2	20.38	181	0	138.74	3322100000	0	0	0	1036800	0	0	0	0	0	0	30461000	1221400	69623000	0	0	0	0	798310	0	0	0	0	0	0	0	2358500	0	0	0	18483000	24821000	160560000	576950000	1282900000	104480000	934970000	75007000	30276000
P27472	Glycogen [starch] synthase isoform 2	GSY2	sp|P27472|GYS2_YEAST Glycogen [starch] synthase isoform 2 OS=Saccharomyces cerevisiae (strain ATCC 204508 / S288c) GN=GSY2 PE=1 SV=3	1	30	42.1	80.078	705	0	323.31	6811100000	0	0	0	858060	3155600	0	3513200	0	1749900	0	0	0	5942000	0	12688000	9245300	72446000	45207000	747330000	4862400000	422620000	11323000	17974000	9239100	42596000	109350000	106300000	58778000	15248000	25294000	8357600	13977000	22952000	10758000	101710000	27914000	23094000	8073400
P00331	Alcohol dehydrogenase 2	ADH2	sp|P00331|ADH2_YEAST Alcohol dehydrogenase 2 OS=Saccharomyces cerevisiae (strain ATCC 204508 / S288c) GN=ADH2 PE=1 SV=3	1	7	20.7	36.731	348	0	19.335	5770500000	4013400	4742700	2533100	1563000	2998800	5414400	11368000	3242700	0	0	0	0	0	0	0	0	0	0	0	0	0	0	0	0	7250000	29036000	4321900000	713370000	45088000	48346000	29507000	62862000	0	75768000	101370000	78393000	102150000	53260000
Q12009	tRNA (guanine-N(7)-)-methyltransferase	TRM8	sp|Q12009|TRMB_YEAST tRNA (guanine-N(7)-)-methyltransferase OS=Saccharomyces cerevisiae (strain ATCC 204508 / S288c) GN=TRM8 PE=1 SV=1	1	6	22.7	33.391	286	0	52.458	366970000	0	0	0	0	0	0	0	0	0	0	0	0	0	0	0	0	0	0	0	0	0	0	0	0	33147000	0	0	0	0	206880000	2060100	8415600	3602600	1903300	94947000	1527800	1099700	7391500
P43547;P47182;P25612;P42884	Putative aryl-alcohol dehydrogenase AAD6	AAD6	sp|P43547|AAD6_YEAST Putative aryl-alcohol dehydrogenase AAD6 OS=Saccharomyces cerevisiae (strain ATCC 204508 / S288c) GN=AAD6 PE=5 SV=1	4	3	14.2	23.918	212	0	7.9622	93817000	0	0	0	0	0	0	0	0	0	0	0	0	0	0	0	0	0	0	0	0	0	0	0	0	0	0	0	0	0	0	0	0	0	974010	90352000	2491100	0	0
P15700	Uridylate kinase	URA6	sp|P15700|KCY_YEAST Uridylate kinase OS=Saccharomyces cerevisiae (strain ATCC 204508 / S288c) GN=URA6 PE=1 SV=1	1	4	23	22.933	204	0	19.413	96712000	0	0	0	0	0	0	5357800	0	0	0	0	0	0	0	0	0	0	0	0	0	0	0	0	0	0	0	0	0	0	0	0	0	0	0	89938000	0	0	0
P07246	Alcohol dehydrogenase 3, mitochondrial	ADH3	sp|P07246|ADH3_YEAST Alcohol dehydrogenase 3, mitochondrial OS=Saccharomyces cerevisiae (strain ATCC 204508 / S288c) GN=ADH3 PE=1 SV=2	1	14	32.8	40.369	375	0	140.83	8535100000	0	477140	1319800	10596000	294610	0	1325300	263710000	1472800	0	859270	0	164840	353590	660930	642440	0	6114700	0	1835000	3052900	1510500	3643200	7182700	3990000	469570000	7093400000	283830000	65982000	41843000	10675000	22280000	22388000	17764000	82739000	29518000	29961000	7905400
P0CX32;P0CX31	40S ribosomal protein S24-B;40S ribosomal protein S24-A	RPS24B;RPS24A	sp|P0CX32|RS24B_YEAST 40S ribosomal protein S24-B OS=Saccharomyces cerevisiae (strain ATCC 204508 / S288c) GN=RPS24B PE=1 SV=1;sp|P0CX31|RS24A_YEAST 40S ribosomal protein S24-A OS=Saccharomyces cerevisiae (strain ATCC 204508 / S288c) GN=RPS24A PE=1 SV=1	2	10	53.3	15.329	135	0	232.72	9209900000	11110000	172770000	6354400	5489100	0	3277000	7332500	0	0	0	0	35676000	0	0	0	0	0	0	0	0	0	5129000	5397800	0	0	3246200	0	0	0	6318300	9854600	3373200	28507000	34130000	81239000	238980000	5160500000	2942800000
O13516	40S ribosomal protein S9-A	RPS9A	sp|O13516|RS9A_YEAST 40S ribosomal protein S9-A OS=Saccharomyces cerevisiae (strain ATCC 204508 / S288c) GN=RPS9A PE=1 SV=3	1	15	51.3	22.443	197	0	179.54	211900000	0	0	0	0	0	0	0	0	0	0	0	0	0	0	0	0	0	0	0	0	0	0	0	0	0	1073100	3026700	0	4649200	7194500	8392100	20110000	43741000	24289000	79442000	2705100	3689600	11891000
Q03195	Translation initiation factor RLI1	RLI1	sp|Q03195|RLI1_YEAST Translation initiation factor RLI1 OS=Saccharomyces cerevisiae (strain ATCC 204508 / S288c) GN=RLI1 PE=1 SV=1	1	23	40.6	68.34	608	0	323.31	4006600000	4675400	0	474460	0	1120900	778460	0	0	0	0	203520	2526100	0	0	5216400	3915100	4973800	936000	3109900	6982700	30010000	2294400000	529530000	60701000	364250000	39023000	74500000	38205000	28669000	59475000	29280000	46126000	50331000	37211000	75641000	34921000	81832000	20755000
P42847	37S ribosomal protein S18, mitochondrial	MRPS18	sp|P42847|RT18_YEAST 37S ribosomal protein S18, mitochondrial OS=Saccharomyces cerevisiae (strain ATCC 204508 / S288c) GN=MRPS18 PE=1 SV=2	1	4	18.4	24.563	217	0	6.6443	90852000	0	0	0	0	0	0	0	0	0	0	0	0	0	0	0	0	0	0	0	0	0	0	3835800	0	3599700	0	0	0	0	0	0	0	0	9694400	73722000	0	0	0
P14742	Glutamine--fructose-6-phosphate aminotransferase [isomerizing]	GFA1	sp|P14742|GFA1_YEAST Glutamine--fructose-6-phosphate aminotransferase [isomerizing] OS=Saccharomyces cerevisiae (strain ATCC 204508 / S288c) GN=GFA1 PE=1 SV=4	1	15	18.8	80.046	717	0	323.31	1882900000	4314100	0	0	823880	0	4352300	0	0	0	0	0	0	0	0	12254000	15430000	11945000	12106000	70358000	1085600000	47924000	9204700	5707700	0	9249200	51428000	221070000	131240000	20988000	13802000	21669000	20807000	9601000	2526900	73517000	7911900	15123000	1887500
P48353	Protein HLJ1	HLJ1	sp|P48353|HLJ1_YEAST Protein HLJ1 OS=Saccharomyces cerevisiae (strain ATCC 204508 / S288c) GN=HLJ1 PE=1 SV=1	1	2	8	25.008	224	0	10.694	121910000	0	0	0	0	0	0	0	0	0	0	0	0	0	0	0	0	0	0	0	0	0	16530000	0	0	0	0	0	0	0	0	0	0	0	11819000	72863000	6788500	6527400	0
P02309	Histone H4	HHF1	sp|P02309|H4_YEAST Histone H4 OS=Saccharomyces cerevisiae (strain ATCC 204508 / S288c) GN=HHF1 PE=1 SV=2	1	9	53.4	11.368	103	0	220.31	22482000000	24154000	62054000	6010400000	16680000	2234300	7224100	7988600	1620200	2612000	0	0	0	3145800	2104900000	0	0	0	0	0	0	0	0	8655300	0	0	0	0	0	4724900	2353900	1496300	11958000	27729000	25627000	70855000	74436000	78170000	35280000
P39938;P39939	40S ribosomal protein S26-A;40S ribosomal protein S26-B	RPS26A;RPS26B	sp|P39938|RS26A_YEAST 40S ribosomal protein S26-A OS=Saccharomyces cerevisiae (strain ATCC 204508 / S288c) GN=RPS26A PE=1 SV=1;sp|P39939|RS26B_YEAST 40S ribosomal protein S26-B OS=Saccharomyces cerevisiae (strain ATCC 204508 / S288c) GN=RPS26B PE=1 SV=1	2	3	26.9	13.505	119	0	53.077	3626600000	15455000	18066000	4426800	0	0	0	0	1185200	0	0	0	0	0	0	0	0	0	1088600	0	0	2268200	3868900	1769700	0	3232600	5531100	0	7069800	7233900	0	18691000	15032000	5439300	20091000	69888000	72017000	2764500000	246130000
P38892	Probable S-adenosylmethionine-dependent methyltransferase CRG1	CRG1	sp|P38892|CRG1_YEAST Probable S-adenosylmethionine-dependent methyltransferase CRG1 OS=Saccharomyces cerevisiae (strain ATCC 204508 / S288c) GN=CRG1 PE=1 SV=1	1	10	39.2	33.785	291	0	116.14	1621100000	0	0	0	9080400	11172000	14337000	2371100	2560600	0	0	0	0	0	0	11050000	13554000	5998300	3247000	1873700	3820300	14660000	10489000	9763800	0	9302800	12855000	0	2218500	485720000	698130000	117950000	27962000	4195500	8964400	69144000	49069000	10341000	1434100
P11076	ADP-ribosylation factor 1	ARF1	sp|P11076|ARF1_YEAST ADP-ribosylation factor 1 OS=Saccharomyces cerevisiae (strain ATCC 204508 / S288c) GN=ARF1 PE=1 SV=3	1	9	60.2	20.529	181	0	258.77	5818600000	18678000	5566600	2030400	838210	0	0	703230	1665900	2292500	0	0	1112400	145080000	4681600	0	1346600	0	0	0	0	4408100	0	4881800	0	0	1100500	3452400	1086900	5335900	41823000	1816000	13434000	3567700	12574000	66074000	1975000000	2922500000	41277000
Q06217	Small nuclear ribonucleoprotein Sm D2	SMD2	sp|Q06217|SMD2_YEAST Small nuclear ribonucleoprotein Sm D2 OS=Saccharomyces cerevisiae (strain ATCC 204508 / S288c) GN=SMD2 PE=1 SV=2	1	5	47.3	12.853	110	0	50.233	2737600000	0	0	1588300	0	0	14689000	0	0	0	0	0	106720000	0	27929000	106010000	179590000	2685800	2029100	3301300	60305000	0	3909000	0	73340000	2768500	0	0	2658500	0	320240000	0	230180000	257830000	114700000	65815000	130420000	386360000	8001800
P40302	Proteasome subunit alpha type-6	PRE5	sp|P40302|PSA6_YEAST Proteasome subunit alpha type-6 OS=Saccharomyces cerevisiae (strain ATCC 204508 / S288c) GN=PRE5 PE=1 SV=1	1	4	17.9	25.604	234	0	7.1375	174960000	0	0	398520	0	5909900	0	0	1850500	0	0	0	3973400	0	0	2561800	4174700	0	0	0	0	0	21496000	0	0	0	0	0	44585000	0	19223000	0	0	0	3784000	63796000	1185500	0	1016200
P32904	54S ribosomal protein L6, mitochondrial	MRPL6	sp|P32904|RM06_YEAST 54S ribosomal protein L6, mitochondrial OS=Saccharomyces cerevisiae (strain ATCC 204508 / S288c) GN=MRPL6 PE=1 SV=2	1	3	14.5	23.889	214	0	27.538	63754000	0	0	0	0	0	0	0	0	0	0	0	0	0	0	0	0	0	0	0	0	0	0	0	0	0	0	0	0	0	0	0	0	0	0	63754000	0	0	0
Q12462	Peroxisomal membrane protein PMP27	PEX11	sp|Q12462|PEX11_YEAST Peroxisomal membrane protein PMP27 OS=Saccharomyces cerevisiae (strain ATCC 204508 / S288c) GN=PEX11 PE=1 SV=2	1	3	12.3	26.875	236	0	6.3522	100800000	0	0	0	0	0	0	1280700	0	0	0	0	0	0	0	0	0	0	0	0	0	0	0	0	0	0	0	0	1137600	0	0	0	4330400	0	4580100	63444000	0	26024000	0
P23301;P19211	Eukaryotic translation initiation factor 5A-1	HYP2	sp|P23301|IF5A1_YEAST Eukaryotic translation initiation factor 5A-1 OS=Saccharomyces cerevisiae (strain ATCC 204508 / S288c) GN=HYP2 PE=1 SV=3	2	6	40.1	17.114	157	0	323.31	3210900000	2505300	0	1791400	0	0	5527200	12057000	0	841870	0	0	0	29898000	819050	1409900	2682600	0	1189300	0	1018100	9934800	5837700	76447000	0	0	10626000	32410000	1586800	14246000	12780000	10232000	15600000	0	9731200	63121000	555600000	1623300000	162560000
P38555	GTP-binding protein YPT31/YPT8	YPT31	sp|P38555|YPT31_YEAST GTP-binding protein YPT31/YPT8 OS=Saccharomyces cerevisiae (strain ATCC 204508 / S288c) GN=YPT31 PE=1 SV=3	1	13	62.8	24.469	223	0	323.31	3100000000	0	0	0	21790000	0	0	0	0	0	0	20690000	3488900	0	0	0	0	0	3256000	0	0	0	974250	0	2164800	0	0	0	0	0	0	0	2483800	1061300000	1450400000	61671000	29607000	153430000	47224000
Q06504	N-terminal acetyltransferase B complex catalytic subunit NAT3	NAT3	sp|Q06504|NAT3_YEAST N-terminal acetyltransferase B complex catalytic subunit NAT3 OS=Saccharomyces cerevisiae (strain ATCC 204508 / S288c) GN=NAT3 PE=1 SV=2	1	4	28.7	22.921	195	0	170.4	66265000	0	0	0	0	0	0	0	0	0	0	0	0	0	0	0	0	0	0	0	0	2492500	0	0	0	0	0	0	0	0	0	0	0	0	0	61107000	2665200	0	0
P40069	Importin subunit beta-4	KAP123	sp|P40069|IMB4_YEAST Importin subunit beta-4 OS=Saccharomyces cerevisiae (strain ATCC 204508 / S288c) GN=KAP123 PE=1 SV=1	1	14	14.9	122.6	1113	0	81.976	387290000	522020	0	0	1820400	671500	0	1436600	0	1790600	0	3709600	0	0	0	94760000	96284000	16128000	7742900	9976200	2742400	7542600	1637900	9775700	9105900	12565000	0	3584400	0	17400000	0	0	936980	2663900	1117000	57854000	7257800	18267000	0
P02406	60S ribosomal protein L28	RPL28	sp|P02406|RL28_YEAST 60S ribosomal protein L28 OS=Saccharomyces cerevisiae (strain ATCC 204508 / S288c) GN=RPL28 PE=1 SV=3	1	9	45.6	16.721	149	0	64.988	7450900000	146640000	56926000	4496500	4562600	0	0	838760	794320	2182300	0	0	0	26801000	4421600	0	3491200	1477600	0	1826200	1546300	0	0	0	1994800	3560000	25116000	30580000	30846000	37986000	39588000	55212000	48847000	72453000	40102000	56812000	58439000	6170500000	262420000
P16140	V-type proton ATPase subunit B	VMA2	sp|P16140|VATB_YEAST V-type proton ATPase subunit B OS=Saccharomyces cerevisiae (strain ATCC 204508 / S288c) GN=VMA2 PE=1 SV=2	1	34	65	57.749	517	0	323.31	21699000000	0	0	0	6107900	0	5267800	5076500	0	0	0	1691600	0	0	0	8784000	10893000	0	961750	1461000	743160	38397000	8986100	44799000	19474000000	231480000	187620000	453740000	153250000	166790000	83657000	51605000	13785000	198590000	41119000	56671000	34757000	65922000	22497000
Q02754	Uncharacterized protein YPL067C	YPL067C	sp|Q02754|YP067_YEAST Uncharacterized protein YPL067C OS=Saccharomyces cerevisiae (strain ATCC 204508 / S288c) GN=YPL067C PE=1 SV=1	1	3	18.2	22.776	198	0	19.592	70533000	1831400	0	0	0	0	0	0	0	0	0	0	0	0	297830	0	0	7118100	0	0	0	0	0	0	0	0	0	0	1250200	0	0	0	0	720420	0	56324000	0	0	2990900
P33297	26S protease regulatory subunit 6A	RPT5	sp|P33297|PRS6A_YEAST 26S protease regulatory subunit 6A OS=Saccharomyces cerevisiae (strain ATCC 204508 / S288c) GN=RPT5 PE=1 SV=3	1	19	55.3	48.255	434	0	323.31	1296700000	0	0	0	0	893540	0	0	8526400	0	0	0	0	0	0	3129900	0	0	0	3353400	0	0	0	0	16657000	703230000	15100000	45429000	41579000	25980000	10742000	194250000	7906900	43957000	11602000	54798000	34272000	17240000	2402800
P22354	54S ribosomal protein L20, mitochondrial	MRPL20	sp|P22354|RM20_YEAST 54S ribosomal protein L20, mitochondrial OS=Saccharomyces cerevisiae (strain ATCC 204508 / S288c) GN=MRPL20 PE=1 SV=2	1	2	12.8	22.392	195	0	10.43	61715000	0	0	0	0	0	0	0	0	0	0	0	0	0	0	0	0	0	0	0	0	0	0	0	0	2572700	0	0	1604800	0	0	412900	0	0	3372800	53752000	0	0	0
P32582	Cystathionine beta-synthase	CYS4	sp|P32582|CBS_YEAST Cystathionine beta-synthase OS=Saccharomyces cerevisiae (strain ATCC 204508 / S288c) GN=CYS4 PE=1 SV=1	1	16	43	56.021	507	0	323.31	1702300000	0	0	0	0	0	0	0	633380	0	0	0	0	0	0	1234300	0	0	1405800	0	0	0	1910200	3664800	314290000	231990000	261980000	207640000	42329000	60885000	38333000	126070000	58984000	39288000	41228000	52830000	22008000	73650000	24115000
P40053	Altered inheritance of mitochondria protein 9, mitochondrial	AIM9	sp|P40053|AIM9_YEAST Altered inheritance of mitochondria protein 9, mitochondrial OS=Saccharomyces cerevisiae (strain ATCC 204508 / S288c) GN=AIM9 PE=1 SV=1	1	31	51.7	72.413	627	0	323.31	4720800000	8461100	2992400	558640	0	43589000	9387700	0	512030	0	0	991210	445680	8142100	628100	2125000	0	1432900	1312100	1698900	896660	4069800000	74188000	54013000	12968000	15596000	27395000	44146000	24516000	32302000	49158000	4249400	19010000	13392000	6274400	52613000	2961400	1716000	94853000
Q08873	Transgelin	SCP1	sp|Q08873|SCP1_YEAST Transgelin OS=Saccharomyces cerevisiae (strain ATCC 204508 / S288c) GN=SCP1 PE=1 SV=1	1	3	17.5	22.748	200	0	52.877	121200000	0	0	0	0	0	0	0	3443600	0	0	0	0	0	0	19043000	0	0	0	0	0	0	0	0	0	0	31986000	7188800	0	2328400	0	0	3895400	0	0	52033000	1280000	0	0
P53949	Tyrosine-protein phosphatase-like protein OCA2	OCA2	sp|P53949|OCA2_YEAST Tyrosine-protein phosphatase-like protein OCA2 OS=Saccharomyces cerevisiae (strain ATCC 204508 / S288c) GN=OCA2 PE=1 SV=1	1	2	9.6	22.472	197	0	8.6485	53393000	0	0	0	0	0	0	0	0	0	0	0	0	0	0	0	0	0	0	0	0	0	0	0	0	0	0	0	0	0	0	0	0	0	0	50443000	0	0	2949600
Q04170	Uncharacterized protein YDR391C	YDR391C	sp|Q04170|YD391_YEAST Uncharacterized protein YDR391C OS=Saccharomyces cerevisiae (strain ATCC 204508 / S288c) GN=YDR391C PE=1 SV=1	1	5	19.4	26.273	232	0	38.532	523660000	0	0	0	0	0	0	0	0	0	0	0	0	0	0	0	0	0	0	0	0	0	0	0	0	0	0	0	0	0	0	0	0	164020000	277500000	49711000	5286100	7057400	4084100
Q03786	Probable gluconokinase	YDR248C	sp|Q03786|GNTK_YEAST Probable gluconokinase OS=Saccharomyces cerevisiae (strain ATCC 204508 / S288c) GN=YDR248C PE=1 SV=1	1	3	13.5	22.174	193	0	4.5252	121230000	4426700	3301100	2895800	0	0	17459000	0	0	0	0	0	0	0	0	1593200	0	0	0	0	0	0	245820	0	0	4528400	0	0	0	0	0	0	0	0	0	49300000	36498000	0	0
P53927	Ribosome biogenesis protein 15	NOP15	sp|P53927|NOP15_YEAST Ribosome biogenesis protein 15 OS=Saccharomyces cerevisiae (strain ATCC 204508 / S288c) GN=NOP15 PE=1 SV=1	1	5	23.2	25.447	220	0	25.67	277510000	0	0	0	0	0	0	0	0	4999400	0	0	0	0	0	0	0	0	0	0	0	12541000	0	0	0	0	0	10035000	2606300	0	167400000	5086200	0	2146900	6408100	47978000	13954000	4351400	0
P20606	Small COPII coat GTPase SAR1	SAR1	sp|P20606|SAR1_YEAST Small COPII coat GTPase SAR1 OS=Saccharomyces cerevisiae (strain ATCC 204508 / S288c) GN=SAR1 PE=1 SV=1	1	9	59.5	21.45	190	0	323.31	6703200000	1343100	0	0	0	0	0	331900	0	562870	0	3594800	4397600	845210000	3675500	0	0	1689000	0	0	0	0	0	0	0	0	0	979770	1809600	5080500	110800000	9039300	4079700	0	4586400	47088000	5097700000	226560000	95043000
Q04728	Arginine biosynthesis bifunctional protein ArgJ, mitochondrial;Glutamate N-acetyltransferase;Amino-acid acetyltransferase;Arginine biosynthesis bifunctional protein ArgJ alpha chain;Arginine biosynthesis bifunctional protein ArgJ beta chain	ARG7	sp|Q04728|ARGJ_YEAST Arginine biosynthesis bifunctional protein ArgJ, mitochondrial OS=Saccharomyces cerevisiae (strain ATCC 204508 / S288c) GN=ARG7 PE=1 SV=1	1	7	14.7	47.848	441	0	26.509	304990000	0	0	0	1454000	1665700	0	0	0	0	0	2747000	0	0	0	0	0	11629000	5696300	0	0	0	2136400	1863700	0	0	0	0	0	1870000	3079400	5427300	61646000	111630000	43671000	46357000	3004000	0	0
P32419	Malate dehydrogenase, peroxisomal	MDH3	sp|P32419|MDHP_YEAST Malate dehydrogenase, peroxisomal OS=Saccharomyces cerevisiae (strain ATCC 204508 / S288c) GN=MDH3 PE=1 SV=3	1	7	25.7	37.186	343	0	37.721	830260000	0	0	0	0	0	0	0	2030700	0	0	3245800	3034400	734630	2173000	22299000	13368000	30771000	18873000	15295000	16527000	30169000	0	41141000	42541000	0	98327000	188800000	13632000	51134000	0	39257000	40543000	0	18673000	45052000	7505000	39806000	6586800
P43621	Coatomer subunit delta	RET2	sp|P43621|COPD_YEAST Coatomer subunit delta OS=Saccharomyces cerevisiae (strain ATCC 204508 / S288c) GN=RET2 PE=1 SV=3	1	12	20.7	60.627	546	0	248.47	1458500000	0	775930	13521000	787100	0	0	0	0	0	0	0	0	5509500	0	10430000	1365200	2819300	5309100	0	2130500	600820	1208100000	5086400	11546000	1703800	5186500	6796900	59304000	0	0	20452000	0	5769500	15360000	44899000	4742000	6732200	2358400
P25378	Rheb-like protein RHB1	RHB1	sp|P25378|RHEB_YEAST Rheb-like protein RHB1 OS=Saccharomyces cerevisiae (strain ATCC 204508 / S288c) GN=RHB1 PE=1 SV=2	1	2	11	23.338	209	0	8.9247	56531000	0	0	0	0	0	0	0	0	0	0	0	0	0	0	0	1577700	0	0	0	0	0	0	0	0	0	0	0	1147700	0	0	0	0	0	0	44807000	3227300	1812500	3958700
P05759;P0CH09;P0CH08;P0CG63	Ubiquitin-40S ribosomal protein S31;Ubiquitin;40S ribosomal protein S31;Ubiquitin-60S ribosomal protein L40;Ubiquitin;60S ribosomal protein L40;Polyubiquitin;Ubiquitin	RPS31;RPL40B;RPL40A;UBI4	sp|P05759|RS27A_YEAST Ubiquitin-40S ribosomal protein S31 OS=Saccharomyces cerevisiae (strain ATCC 204508 / S288c) GN=RPS31 PE=1 SV=3;sp|P0CH09|RL402_YEAST Ubiquitin-60S ribosomal protein L40 OS=Saccharomyces cerevisiae (strain ATCC 204508 / S288c) GN=RPL4	4	2	11.2	17.216	152	0	77.462	1392700000	10237000	16885000	7008300	35944000	32476000	45687000	18628000	12146000	20025000	0	7578700	12901000	8507200	12972000	38211000	31021000	20726000	10639000	24501000	23913000	45944000	55159000	77572000	53253000	58941000	33147000	45377000	0	55351000	44635000	40911000	31838000	22959000	52765000	44027000	22722000	9914600	16499000
P41277;P40106	Glycerol-1-phosphate phosphohydrolase 1	GPP1	sp|P41277|GPP1_YEAST Glycerol-1-phosphate phosphohydrolase 1 OS=Saccharomyces cerevisiae (strain ATCC 204508 / S288c) GN=GPP1 PE=1 SV=3	2	4	21.2	27.947	250	0	21.156	352340000	0	0	0	0	0	8347800	1819800	0	2354700	0	0	733390	0	0	0	0	0	1895900	0	0	0	0	0	0	1411300	0	0	2060200	0	38164000	86239000	65905000	9276300	11410000	41600000	0	58916000	8883600
P39676	Flavohemoprotein	YHB1	sp|P39676|FHP_YEAST Flavohemoprotein OS=Saccharomyces cerevisiae (strain ATCC 204508 / S288c) GN=YHB1 PE=1 SV=2	1	9	29.3	44.646	399	0	163.61	1081900000	0	0	0	0	0	2479000	556990000	3914500	1731400	0	0	0	418610	0	2841600	7121400	10424000	2662300	4936600	3680700	3383800	2190300	2698000	1116000	3696300	40849000	117900000	85418000	20937000	16732000	42931000	489830	18854000	12201000	40299000	21929000	26805000	976590
P31539	Heat shock protein 104	HSP104	sp|P31539|HS104_YEAST Heat shock protein 104 OS=Saccharomyces cerevisiae (strain ATCC 204508 / S288c) GN=HSP104 PE=1 SV=2	1	17	20.4	102.03	908	0	174.52	1281800000	0	0	0	0	0	1639200	0	5183400	0	0	0	0	1026100	0	12335000	89147000	15072000	25433000	53913000	26176000	42531000	123350000	38623000	45102000	9109900	190760000	103810000	51188000	28448000	13925000	28039000	33788000	25072000	25813000	40014000	25057000	81916000	13853000
Q12522	Eukaryotic translation initiation factor 6	TIF6	sp|Q12522|IF6_YEAST Eukaryotic translation initiation factor 6 OS=Saccharomyces cerevisiae (strain ATCC 204508 / S288c) GN=TIF6 PE=1 SV=1	1	5	28.2	26.457	245	0	258.61	2948100000	36515000	629560	570010	14004000	0	39647000	0	17446000	0	0	274060000	43003000	0	0	0	0	0	0	3537600	0	0	1254400	0	64980000	3735500	13979000	5412300	5983800	0	85965000	4234500	9845900	872390000	1391900000	39951000	0	4136300	7774500
Q03940	RuvB-like protein 1	RVB1	sp|Q03940|RUVB1_YEAST RuvB-like protein 1 OS=Saccharomyces cerevisiae (strain ATCC 204508 / S288c) GN=RVB1 PE=1 SV=1	1	22	57.7	50.452	463	0	323.31	2563900000	0	0	0	0	0	85071000	0	1474400	0	0	0	0	0	0	0	2321300	0	0	0	0	2690400	0	0	0	2252500000	4396200	4933500	1286000	1567700	34118000	15168000	9348000	22277000	22888000	39004000	44106000	17573000	1231000
Q06170	Uncharacterized membrane protein YLR326W	YLR326W	sp|Q06170|YL326_YEAST Uncharacterized membrane protein YLR326W OS=Saccharomyces cerevisiae (strain ATCC 204508 / S288c) GN=YLR326W PE=1 SV=1	1	3	14.2	27.423	240	0	42.01	140520000	0	0	0	808950	0	0	1176100	0	0	0	0	1205600	0	0	0	0	0	1651800	0	0	0	0	0	1791100	0	0	0	0	1280300	1667300	3907300	28621000	39467000	10680000	38337000	9926500	0	0
P38234	Protein RFS1	RFS1	sp|P38234|RFS1_YEAST Protein RFS1 OS=Saccharomyces cerevisiae (strain ATCC 204508 / S288c) GN=RFS1 PE=1 SV=1	1	5	26.7	22.921	210	0	28.373	178530000	0	0	0	0	0	0	0	0	0	0	0	0	0	0	0	677780	0	0	0	0	0	0	0	0	0	0	1377200	1839900	0	0	0	0	14143000	91555000	37290000	10620000	8293400	8039000
P10659	S-adenosylmethionine synthase 1	SAM1	sp|P10659|METK1_YEAST S-adenosylmethionine synthase 1 OS=Saccharomyces cerevisiae (strain ATCC 204508 / S288c) GN=SAM1 PE=1 SV=2	1	8	24.6	41.818	382	0	109.75	2267300000	0	10814000	0	0	2547700	4769300	239640000	688300	6139100	0	44799000	0	1774900	0	12698000	93150000	10761000	5687300	6839800	5909700	14808000	12929000	22894000	5570600	23849000	248150000	219520000	43442000	88166000	151000000	212920000	201790000	60953000	41000000	37278000	33428000	199250000	26554000
P34227	Mitochondrial peroxiredoxin PRX1	PRX1	sp|P34227|PRX1_YEAST Mitochondrial peroxiredoxin PRX1 OS=Saccharomyces cerevisiae (strain ATCC 204508 / S288c) GN=PRX1 PE=1 SV=1	1	10	50.6	29.495	261	0	157.91	1569200000	0	0	0	0	0	0	0	0	0	0	1461300	8197200	0	0	0	0	0	0	0	481150	0	0	0	0	0	0	4134100	7170100	0	0	3910500	2152000	282240000	1172400000	36918000	15039000	22550000	4516300
P22517	Calcium/calmodulin-dependent protein kinase II	CMK2	sp|P22517|KCC2_YEAST Calcium/calmodulin-dependent protein kinase II OS=Saccharomyces cerevisiae (strain ATCC 204508 / S288c) GN=CMK2 PE=1 SV=2	1	9	21.7	50.447	447	0	39.589	758690000	0	0	0	0	0	5707100	0	0	0	0	0	0	0	0	0	0	0	0	896850	4362000	6625300	7433500	2541500	1412500	84033000	31841000	24779000	20958000	45964000	157360000	79395000	46811000	22937000	9014400	36045000	36792000	67162000	18573000
P38845	Cruciform DNA-recognizing protein 1;CRP1 short N-terminal subpeptide;CRP1 short C-terminal subpeptide	CRP1	sp|P38845|CRP1_YEAST Cruciform DNA-recognizing protein 1 OS=Saccharomyces cerevisiae (strain ATCC 204508 / S288c) GN=CRP1 PE=1 SV=1	1	5	13.5	51.115	465	0	51.299	289050000	805050	0	0	2761800	0	0	0	0	0	0	0	0	0	0	0	3466400	0	874760	0	2308500	12052000	0	0	1507700	1595600	4041100	2207500	1552600	3313200	1751400	4913800	9346300	22051000	37817000	35721000	4634900	17526000	21830000
P25605	Acetolactate synthase small subunit, mitochondrial	ILV6	sp|P25605|ILV6_YEAST Acetolactate synthase small subunit, mitochondrial OS=Saccharomyces cerevisiae (strain ATCC 204508 / S288c) GN=ILV6 PE=1 SV=2	1	7	29.1	33.986	309	0	161.68	996110000	0	0	0	0	0	0	0	0	8019500	0	0	0	0	0	0	0	0	0	0	0	0	6095000	0	0	0	0	0	0	25969000	858700000	8424400	15533000	6642300	9533700	35398000	2889600	5146500	0
P38210	Chromatin structure-remodeling complex protein RSC14	LDB7	sp|P38210|LDB7_YEAST Chromatin structure-remodeling complex protein RSC14 OS=Saccharomyces cerevisiae (strain ATCC 204508 / S288c) GN=LDB7 PE=1 SV=2	1	4	28.3	19.792	180	0	82.917	125100000	0	0	0	0	0	0	0	0	0	0	0	0	0	0	0	0	0	0	0	1882300	0	0	0	0	0	0	0	0	0	0	0	0	0	0	35226000	87993000	0	0
P87262;P40525	60S ribosomal protein L34-A;60S ribosomal protein L34-B	RPL34A;RPL34B	sp|P87262|RL34A_YEAST 60S ribosomal protein L34-A OS=Saccharomyces cerevisiae (strain ATCC 204508 / S288c) GN=RPL34A PE=1 SV=1;sp|P40525|RL34B_YEAST 60S ribosomal protein L34-B OS=Saccharomyces cerevisiae (strain ATCC 204508 / S288c) GN=RPL34B PE=1 SV=1	2	1	6.6	13.639	121	0	10.885	1560900000	31996000	1334600	1462700	0	0	0	0	0	0	0	0	453690	1285500	1915000	1706100	0	2251100	1029300	0	902210	1447400	2919900	3468100	2379000	4081700	0	10508000	4655900	10076000	13289000	17022000	11663000	13474000	14633000	35025000	26091000	1309400000	36491000
P40893	Regulation of enolase protein 1	REE1	sp|P40893|REE1_YEAST Regulation of enolase protein 1 OS=Saccharomyces cerevisiae (strain ATCC 204508 / S288c) GN=REE1 PE=1 SV=1	1	3	18.2	21.966	198	0	12.933	45601000	0	0	0	0	0	0	0	0	0	0	0	0	0	0	0	0	0	0	0	0	3244200	0	0	0	0	0	0	0	0	0	0	0	2695500	0	34748000	4913600	0	0
Q04772	Increased recombination centers protein 21	IRC21	sp|Q04772|IRC21_YEAST Increased recombination centers protein 21 OS=Saccharomyces cerevisiae (strain ATCC 204508 / S288c) GN=IRC21 PE=1 SV=1	1	2	10.9	23.182	201	0	3.1415	57074000	0	0	303910	0	3329100	3427300	11872000	0	0	0	0	0	0	468280	0	0	0	0	0	0	0	0	0	0	0	0	0	0	0	0	0	0	0	0	33965000	0	3708100	0
P39730	Eukaryotic translation initiation factor 5B	FUN12	sp|P39730|IF2P_YEAST Eukaryotic translation initiation factor 5B OS=Saccharomyces cerevisiae (strain ATCC 204508 / S288c) GN=FUN12 PE=1 SV=2	1	11	11.6	112.27	1002	0	125.93	907560000	18368000	2185300	0	6100300	6587700	2594300	2317800	4730500	1244100	0	0	0	0	0	23303000	30188000	26247000	14892000	56892000	28342000	161060000	114930000	143280000	36427000	8810800	4168200	11802000	6910700	32337000	28622000	12739000	16047000	14474000	14393000	33200000	8584300	7737800	15490000
Q12408	Phosphatidylglycerol/phosphatidylinositol transfer protein	NPC2	sp|Q12408|NPC2_YEAST Phosphatidylglycerol/phosphatidylinositol transfer protein OS=Saccharomyces cerevisiae (strain ATCC 204508 / S288c) GN=NPC2 PE=1 SV=1	1	2	13.3	19.063	173	0	4.624	74740000	0	0	0	0	0	0	0	0	0	0	0	0	0	0	0	0	0	0	0	0	0	0	0	0	0	0	0	0	0	0	0	0	0	0	32949000	0	22953000	8378800
P29547	Elongation factor 1-gamma 1	CAM1	sp|P29547|EF1G1_YEAST Elongation factor 1-gamma 1 OS=Saccharomyces cerevisiae (strain ATCC 204508 / S288c) GN=CAM1 PE=1 SV=2	1	14	35.2	47.087	415	0	101.27	1112400000	0	655460	0	0	1082700	674150000	11278000	1877600	11657000	0	0	0	0	0	0	0	0	0	0	0	0	0	0	0	3208600	12584000	41584000	25332000	31728000	17527000	10585000	48005000	27874000	18573000	32588000	4777300	0	2919500
P00560	Phosphoglycerate kinase	PGK1	sp|P00560|PGK_YEAST Phosphoglycerate kinase OS=Saccharomyces cerevisiae (strain ATCC 204508 / S288c) GN=PGK1 PE=1 SV=2	1	18	49	44.738	416	0	259.65	1096800000	0	1007700	16959000	7265900	16096000	609940000	2151600	3085700	11497000	0	0	0	4212900	1127200	8765100	2413600	4684500	3185900	3660200	757810	0	9566100	129430000	7836900	16550000	2987900	27122000	21222000	38028000	32481000	600150	5462900	12901000	1291300	32575000	22480000	14465000	8503800
P53952	Uncharacterized protein YNL050C		sp|P53952|YNF0_YEAST Uncharacterized protein YNL050C OS=Saccharomyces cerevisiae (strain ATCC 204508 / S288c) GN=YNL050C PE=4 SV=1	1	6	23.3	31.437	270	0	29.569	376330000	0	0	458270	1681400	3597900	2448500	86875000	968040	1583400	0	0	0	0	0	1375800	0	0	469080	0	0	1143000	0	0	0	7162600	0	1167200	9609200	1690700	4819500	13902000	150490000	0	10508000	32253000	39001000	5121700	0
P0CS90;P39987	Heat shock protein SSC1, mitochondrial	SSC1	sp|P0CS90|HSP77_YEAST Heat shock protein SSC1, mitochondrial OS=Saccharomyces cerevisiae (strain ATCC 204508 / S288c) GN=SSC1 PE=1 SV=1	2	13	24.6	70.627	654	0	128.84	951960000	0	0	0	883320	23482000	2654700	3409300	9401400	744520	0	362580	0	0	0	1897800	0	0	0	0	8186400	140780000	83866000	75346000	3730700	21317000	120310000	147690000	93427000	23391000	39176000	1947400	13744000	40539000	17933000	32194000	16377000	27717000	0
P28737;Q06708	Protein MSP1	MSP1	sp|P28737|MSP1_YEAST Protein MSP1 OS=Saccharomyces cerevisiae (strain ATCC 204508 / S288c) GN=MSP1 PE=1 SV=2	2	6	16.9	40.343	362	0	9.8654	259490000	0	0	0	0	0	0	0	0	0	0	0	0	0	0	0	0	0	0	0	3989600	917830	2140300	0	0	0	86934000	89277000	22734000	13145000	3228900	2472200	2638400	0	0	32010000	0	0	0
P16550	Protein APA1;5,5-P-1,P-4-tetraphosphate phosphorylase;ADP-sulfurylase	APA1	sp|P16550|APA1_YEAST Protein APA1 OS=Saccharomyces cerevisiae (strain ATCC 204508 / S288c) GN=APA1 PE=1 SV=4	1	13	49.5	36.492	321	0	279.77	2854900000	4211100	6238200	0	0	1693000	825960	0	0	0	0	0	5197100	0	4588600	613180	0	0	0	2791400	0	0	3966500	808540	0	4505500	67401000	2255200000	77075000	186360000	71299000	6400900	14789000	38189000	37676000	31575000	5828000	5748900	8201200
P23337	Glycogen [starch] synthase isoform 1	GSY1	sp|P23337|GYS1_YEAST Glycogen [starch] synthase isoform 1 OS=Saccharomyces cerevisiae (strain ATCC 204508 / S288c) GN=GSY1 PE=1 SV=3	1	21	31.5	80.509	708	0	323.31	1082500000	0	0	0	0	0	2564200	1376500	0	0	0	0	10291000	0	0	13624000	838640	2844600	13159000	857760000	67313000	24638000	3705400	2998600	19237000	2147400	2526400	3967100	0	2487200	1374900	1070200	3921800	0	0	31411000	0	1396100	7683800
Q03655	Probable 1,3-beta-glucanosyltransferase GAS3	GAS3	sp|Q03655|GAS3_YEAST Probable 1,3-beta-glucanosyltransferase GAS3 OS=Saccharomyces cerevisiae (strain ATCC 204508 / S288c) GN=GAS3 PE=1 SV=1	1	3	9.2	56.793	524	0	29.933	97463000	0	0	736250	1288000	0	7783900	2071900	0	0	0	0	0	2852200	0	39696000	2257000	2274500	1302800	0	0	0	0	0	0	0	0	4868800	0	0	0	0	1172800	0	0	31159000	0	0	0
P09457	ATP synthase subunit 5, mitochondrial	ATP5	sp|P09457|ATPO_YEAST ATP synthase subunit 5, mitochondrial OS=Saccharomyces cerevisiae (strain ATCC 204508 / S288c) GN=ATP5 PE=1 SV=1	1	3	16	22.814	212	0	11.149	76664000	0	0	0	0	0	0	0	0	0	0	0	0	685230	0	0	0	0	0	0	0	0	0	0	2320200	0	0	0	0	0	0	0	26705000	0	0	30995000	15958000	0	0
P41911	Glycerol-3-phosphate dehydrogenase [NAD(+)] 2, mitochondrial	GPD2	sp|P41911|GPD2_YEAST Glycerol-3-phosphate dehydrogenase [NAD(+)] 2, mitochondrial OS=Saccharomyces cerevisiae (strain ATCC 204508 / S288c) GN=GPD2 PE=1 SV=2	1	7	18.9	49.421	440	0	115.34	506010000	0	43431000	0	0	0	1449500	202570000	578020	0	0	0	0	0	0	0	973670	0	974130	0	1246500	0	0	1030600	0	0	30884000	21754000	4158500	34586000	47753000	7234100	9628700	5286500	6555900	29664000	17949000	14464000	3840100
P52919	NAP1-binding protein	NBP1	sp|P52919|NBP1_YEAST NAP1-binding protein OS=Saccharomyces cerevisiae (strain ATCC 204508 / S288c) GN=NBP1 PE=1 SV=1	1	5	16.9	37.353	319	0	29.969	2404300000	2634800	0	0	17918000	4799800	10307000	5916100	8003000	0	0	0	0	0	0	1461900000	84235000	95806000	44731000	35168000	29463000	39133000	54990000	52457000	40966000	38281000	72665000	35829000	17627000	29604000	27315000	14534000	16960000	17989000	13157000	29585000	7922400	26751000	10302000
P34253	Protein KTI12	KTI12	sp|P34253|KTI12_YEAST Protein KTI12 OS=Saccharomyces cerevisiae (strain ATCC 204508 / S288c) GN=KTI12 PE=1 SV=2	1	11	43.1	35.322	313	0	323.31	1249400000	882610	8942700	7412600	0	5373100	10519000	0	0	40946000	0	1517400	0	6521700	0	492560	694310	2253800	0	4592100	0	0	2558600	6259800	0	0	1261100	0	13690000	696550000	351470000	4594300	13685000	985540	2003100	29562000	6035900	15348000	6778600
O14455	60S ribosomal protein L36-B	RPL36B	sp|O14455|RL36B_YEAST 60S ribosomal protein L36-B OS=Saccharomyces cerevisiae (strain ATCC 204508 / S288c) GN=RPL36B PE=1 SV=3	1	8	57	11.135	100	0	215.81	6879100000	19917000	7551000	115750000	5676200	0	0	0	0	0	0	3789900	0	0	235060000	0	6016900	3296800	0	5490100	988000	0	3309500	0	7776100	9829000	4038800	14756000	0	0	0	4832300	0	14647000	3420400	29544000	10934000	24376000	8982500
P05744	60S ribosomal protein L33-A	RPL33A	sp|P05744|RL33A_YEAST 60S ribosomal protein L33-A OS=Saccharomyces cerevisiae (strain ATCC 204508 / S288c) GN=RPL33A PE=1 SV=3	1	5	39.3	12.154	107	0	50.648	3322500000	0	0	81843000	0	0	67094000	0	1927100	2544700	0	0	0	0	411700000	0	0	0	0	0	2006700	0	0	0	0	1295100	0	0	0	3249100	10119000	2771500	4843900	0	1007800	29436000	18864000	50312000	642290
P07264	3-isopropylmalate dehydratase	LEU1	sp|P07264|LEUC_YEAST 3-isopropylmalate dehydratase OS=Saccharomyces cerevisiae (strain ATCC 204508 / S288c) GN=LEU1 PE=1 SV=3	1	5	6.8	85.793	779	0	8.8086	275010000	0	0	0	6051400	0	0	0	0	0	0	1348500	0	0	0	3752100	3017400	31402000	8627600	12047000	25977000	12719000	2865500	6451600	3343400	6608400	1197900	4746800	3029000	23339000	3300800	11822000	12649000	8743700	10417000	28710000	3452100	11347000	4585400
P0CX52;P0CX51	40S ribosomal protein S16-B;40S ribosomal protein S16-A	RPS16B;RPS16A	sp|P0CX52|RS16B_YEAST 40S ribosomal protein S16-B OS=Saccharomyces cerevisiae (strain ATCC 204508 / S288c) GN=RPS16B PE=1 SV=1;sp|P0CX51|RS16A_YEAST 40S ribosomal protein S16-A OS=Saccharomyces cerevisiae (strain ATCC 204508 / S288c) GN=RPS16A PE=1 SV=1	2	12	72	15.847	143	0	290.55	10165000000	118920000	9122900	2095600	0	0	8948600	0	1008600	784400	0	413380	0	49284000	0	0	0	450480	0	0	0	968430	951330	21901000	0	14091000	5872400	4954800	1080600	24875000	12739000	2107800	1874500	1885700	419660	28335000	68156000	6815900000	1181800000
Q99369	Family of serine hydrolases 3	FSH3	sp|Q99369|FSH3_YEAST Family of serine hydrolases 3 OS=Saccharomyces cerevisiae (strain ATCC 204508 / S288c) GN=FSH3 PE=2 SV=1	1	3	13.9	30.418	266	0	11.251	94453000	0	0	0	0	0	0	0	0	0	0	0	0	0	0	0	0	0	0	0	0	0	0	0	0	0	0	3123200	0	0	24213000	11099000	5815400	5241500	4762100	28274000	2505800	7777700	1641900
Q00245	GTP-binding protein RHO3	RHO3	sp|Q00245|RHO3_YEAST GTP-binding protein RHO3 OS=Saccharomyces cerevisiae (strain ATCC 204508 / S288c) GN=RHO3 PE=1 SV=2	1	7	34.2	25.312	231	0	102.98	948190000	0	0	0	0	1292800	0	0	0	0	0	4304300	0	0	0	0	9175300	2147200	2668400	2472700	2124800	3615600	3758500	7573900	0	9892500	3636900	7707400	0	0	0	4817300	28320000	337100000	394690000	28233000	7563800	54204000	20735000
P53184	Nicotinamidase	PNC1	sp|P53184|PNC1_YEAST Nicotinamidase OS=Saccharomyces cerevisiae (strain ATCC 204508 / S288c) GN=PNC1 PE=1 SV=1	1	4	25.5	24.993	216	0	38.842	126940000	0	0	0	0	0	0	0	671050	1090000	0	0	1594700	0	0	0	375400	0	0	0	0	251930	0	1227200	1968000	0	0	0	0	0	0	0	0	1481500	61459000	27838000	3336700	4089800	16093000
P40693	Ribosome biogenesis protein RLP7	RLP7	sp|P40693|RLP7_YEAST Ribosome biogenesis protein RLP7 OS=Saccharomyces cerevisiae (strain ATCC 204508 / S288c) GN=RLP7 PE=1 SV=1	1	8	21.4	36.559	322	0	20.744	575040000	0	0	0	0	0	19075000	16156000	26524000	3139000	0	0	0	0	0	0	0	0	0	0	2329400	3176100	0	2926600	0	0	183960000	129920000	1926000	27457000	70203000	9013200	28232000	8294000	9185900	27776000	2576000	3175000	0
P36018	GTP-binding protein YPT52	YPT52	sp|P36018|YPT52_YEAST GTP-binding protein YPT52 OS=Saccharomyces cerevisiae (strain ATCC 204508 / S288c) GN=YPT52 PE=1 SV=1	1	8	38.5	26.132	234	0	218.09	739350000	0	0	0	0	0	1948900	0	0	0	0	21873000	0	0	0	0	0	0	0	0	0	7820400	0	0	0	0	0	0	0	0	0	0	0	379900000	78453000	27762000	47533000	132590000	6213800
P07703	DNA-directed RNA polymerases I and III subunit RPAC1	RPC40	sp|P07703|RPAC1_YEAST DNA-directed RNA polymerases I and III subunit RPAC1 OS=Saccharomyces cerevisiae (strain ATCC 204508 / S288c) GN=RPC40 PE=1 SV=1	1	13	47.8	37.686	335	0	252.55	2625100000	0	0	0	0	528550	0	0	62103000	0	0	0	0	0	0	0	0	2583300	1027000	2310500	3816100	0	0	0	0	0	307490000	1802500000	144800000	21444000	19881000	42855000	7361000	2851100	3855200	27712000	52599000	54417000	22560000
P19358	S-adenosylmethionine synthase 2	SAM2	sp|P19358|METK2_YEAST S-adenosylmethionine synthase 2 OS=Saccharomyces cerevisiae (strain ATCC 204508 / S288c) GN=SAM2 PE=1 SV=3	1	7	19	42.255	384	0	35.715	441220000	0	0	0	0	0	0	5028700	0	0	0	0	0	0	0	1359600	0	0	0	0	0	0	0	0	0	2066800	52014000	64079000	18033000	22026000	11779000	12835000	37310000	22335000	29930000	27257000	12913000	27007000	15736000
P36152	Fe-S cluster assembly protein DRE2	DRE2	sp|P36152|DRE2_YEAST Fe-S cluster assembly protein DRE2 OS=Saccharomyces cerevisiae (strain ATCC 204508 / S288c) GN=DRE2 PE=1 SV=1	1	2	8	38.542	348	0	12.901	55610000	0	0	0	0	0	0	0	0	0	0	0	0	0	0	1623700	0	0	0	0	0	0	0	0	15247000	0	0	4734300	0	0	0	0	0	0	0	27130000	0	6875300	0
P47079	T-complex protein 1 subunit theta	CCT8	sp|P47079|TCPQ_YEAST T-complex protein 1 subunit theta OS=Saccharomyces cerevisiae (strain ATCC 204508 / S288c) GN=CCT8 PE=1 SV=1	1	15	29.8	61.662	568	0	137.16	1580400000	7778800	859650000	3011000	0	0	1756400	0	0	0	0	0	0	0	0	0	0	0	0	0	739510	0	9288800	354330000	27216000	26934000	1674900	22619000	13027000	48208000	27754000	0	16055000	5864100	12449000	26647000	4220900	35853000	51941000
P28007	H/ACA ribonucleoprotein complex subunit 1	GAR1	sp|P28007|GAR1_YEAST H/ACA ribonucleoprotein complex subunit 1 OS=Saccharomyces cerevisiae (strain ATCC 204508 / S288c) GN=GAR1 PE=1 SV=1	1	2	14.1	21.48	205	0	123.62	267950000	0	0	0	0	0	0	0	0	0	0	0	101790000	1548100	0	0	0	0	0	0	0	0	0	0	0	0	10267000	18896000	9403300	13140000	7511300	17582000	15014000	14595000	19739000	26429000	10040000	1994100	0
P50086	Probable 26S proteasome regulatory subunit p28	NAS6	sp|P50086|PSD10_YEAST Probable 26S proteasome regulatory subunit p28 OS=Saccharomyces cerevisiae (strain ATCC 204508 / S288c) GN=NAS6 PE=1 SV=1	1	3	13.6	25.616	228	0	7.626	32945000	0	0	0	0	0	0	0	0	0	0	0	0	0	0	0	0	0	0	0	0	0	0	0	0	0	0	0	0	0	0	0	0	0	6529300	26415000	0	0	0
P30822	Exportin-1	CRM1	sp|P30822|XPO1_YEAST Exportin-1 OS=Saccharomyces cerevisiae (strain ATCC 204508 / S288c) GN=CRM1 PE=1 SV=1	1	7	5.7	124.1	1084	0	10.218	154610000	8018000	0	0	0	0	0	0	465440	0	0	0	0	0	0	78893000	661540	0	0	0	0	0	3853800	0	0	0	4831300	0	0	0	3259300	10352000	0	0	1288300	26391000	2519700	12484000	0
P12904	5-AMP-activated protein kinase subunit gamma	SNF4	sp|P12904|AAKG_YEAST 5-AMP-activated protein kinase subunit gamma OS=Saccharomyces cerevisiae (strain ATCC 204508 / S288c) GN=SNF4 PE=1 SV=1	1	8	28.9	36.401	322	0	148.33	494740000	0	4649700	0	0	0	0	1467700	0	3626400	0	1010900	0	0	0	0	0	0	0	0	3422200	9144200	2141200	2836200	0	0	0	0	0	865720	367680000	7079200	28782000	12020000	4673200	25566000	14071000	2874300	0
P36523	54S ribosomal protein L15, mitochondrial	MRPL15	sp|P36523|RM15_YEAST 54S ribosomal protein L15, mitochondrial OS=Saccharomyces cerevisiae (strain ATCC 204508 / S288c) GN=MRPL15 PE=1 SV=3	1	3	11.5	28.167	253	0	5.5461	35688000	0	0	0	0	0	0	0	0	0	0	0	0	0	0	0	0	0	0	0	0	0	0	0	0	0	0	0	0	0	0	0	0	0	9706100	25426000	0	332370	224110
P40010	Nuclear GTP-binding protein NUG1	NUG1	sp|P40010|NUG1_YEAST Nuclear GTP-binding protein NUG1 OS=Saccharomyces cerevisiae (strain ATCC 204508 / S288c) GN=NUG1 PE=1 SV=1	1	24	48.8	57.708	520	0	323.31	4386900000	0	0	0	0	0	1222500	0	0	0	0	0	0	0	0	459290	822870	0	0	0	0	19227000	3846300000	113730000	80020000	16450000	10886000	81209000	27019000	20807000	14926000	14312000	17488000	18885000	15681000	25266000	11697000	42579000	7897800
P39015	Suppressor protein STM1	STM1	sp|P39015|STM1_YEAST Suppressor protein STM1 OS=Saccharomyces cerevisiae (strain ATCC 204508 / S288c) GN=STM1 PE=1 SV=3	1	13	52	29.995	273	0	323.31	3298300000	0	0	0	0	0	0	0	0	0	0	0	0	0	0	0	0	0	0	0	0	0	0	0	0	0	3280600	1810400000	567370000	210310000	58683000	42350000	66367000	13891000	875250	25056000	6185200	250260000	52837000
P09938	Ribonucleoside-diphosphate reductase small chain 1	RNR2	sp|P09938|RIR2_YEAST Ribonucleoside-diphosphate reductase small chain 1 OS=Saccharomyces cerevisiae (strain ATCC 204508 / S288c) GN=RNR2 PE=1 SV=2	1	3	8.8	46.147	399	0	10.016	71129000	0	0	0	0	0	0	3596400	0	0	0	0	0	0	0	0	0	0	0	0	0	0	0	0	0	0	16440000	18418000	0	3842800	0	0	1557100	1500800	898590	24875000	0	0	0
P39076	T-complex protein 1 subunit beta	CCT2	sp|P39076|TCPB_YEAST T-complex protein 1 subunit beta OS=Saccharomyces cerevisiae (strain ATCC 204508 / S288c) GN=CCT2 PE=1 SV=1	1	13	27.1	57.203	527	0	198.29	544540000	0	1588100	0	0	0	4788400	0	1609900	2345400	0	0	0	0	0	0	727020	0	744700	0	0	0	0	75122000	267440000	26754000	19990000	20997000	7392700	14566000	20021000	7107400	0	7370000	10043000	24613000	2842200	4234000	0
Q03201	37S ribosomal protein S10, mitochondrial	RSM10	sp|Q03201|RT10_YEAST 37S ribosomal protein S10, mitochondrial OS=Saccharomyces cerevisiae (strain ATCC 204508 / S288c) GN=RSM10 PE=1 SV=1	1	2	11.8	23.424	203	0	6.8618	25295000	0	0	0	0	0	0	0	988410	0	0	0	0	0	0	0	0	0	0	0	0	0	0	0	0	0	0	0	0	0	0	0	0	0	0	24306000	0	0	0
P40413	T-complex protein 1 subunit epsilon	CCT5	sp|P40413|TCPE_YEAST T-complex protein 1 subunit epsilon OS=Saccharomyces cerevisiae (strain ATCC 204508 / S288c) GN=CCT5 PE=1 SV=3	1	8	12.8	61.913	562	0	18.041	431580000	0	0	0	0	0	0	4418300	0	691240	0	0	0	0	0	0	0	0	0	0	0	3327000	130250000	133450000	12296000	7806300	4925400	21099000	5241100	1728500	19536000	28968000	9357900	0	9789700	24085000	4062300	5873500	0
P47149	Kinetochore-associated protein NNF1	NNF1	sp|P47149|NNF1_YEAST Kinetochore-associated protein NNF1 OS=Saccharomyces cerevisiae (strain ATCC 204508 / S288c) GN=NNF1 PE=1 SV=3	1	2	10.9	23.639	201	0	35.172	27691000	0	0	0	0	0	0	0	0	0	0	0	0	0	0	0	0	0	0	0	0	3289600	0	0	0	0	0	0	0	0	0	0	0	0	0	23681000	0	0	0
P38998	Saccharopine dehydrogenase [NAD(+), L-lysine-forming]	LYS1	sp|P38998|LYS1_YEAST Saccharopine dehydrogenase [NAD(+), L-lysine-forming] OS=Saccharomyces cerevisiae (strain ATCC 204508 / S288c) GN=LYS1 PE=1 SV=3	1	8	25.5	41.464	373	0	278.12	565470000	0	0	0	0	0	0	2709100	4070700	0	0	0	0	0	0	0	4585300	2066500	1148000	622230	0	0	1408500	1534900	0	1077500	314880000	61623000	14106000	25736000	25330000	16319000	19174000	8833800	11742000	23543000	4098000	5898800	3807900
P40099	5-formyltetrahydrofolate cyclo-ligase	FAU1	sp|P40099|FTHC_YEAST 5-formyltetrahydrofolate cyclo-ligase OS=Saccharomyces cerevisiae (strain ATCC 204508 / S288c) GN=FAU1 PE=1 SV=1	1	2	11.4	24.058	211	0	8.3913	93771000	0	0	0	0	0	0	0	0	0	0	0	5677700	0	0	0	0	0	0	0	0	0	0	1470200	0	0	0	0	6635400	0	0	0	0	0	50950000	22332000	0	0	0
P39719	Flavin carrier protein 2	FLC2	sp|P39719|FLC2_YEAST Flavin carrier protein 2 OS=Saccharomyces cerevisiae (strain ATCC 204508 / S288c) GN=FLC2 PE=1 SV=2	1	1	1.9	87.468	783	0	75.82	104320000	0	0	0	0	0	0	0	24111000	0	0	0	0	0	0	0	0	0	0	0	0	0	0	0	0	0	58194000	0	0	0	0	0	0	0	0	22014000	0	0	0
P11484	Heat shock protein SSB1	SSB1	sp|P11484|HSP75_YEAST Heat shock protein SSB1 OS=Saccharomyces cerevisiae (strain ATCC 204508 / S288c) GN=SSB1 PE=1 SV=3	1	30	53.3	66.601	613	0	12.555	5871000000	0	0	2620500	0	49470000	0	9915100	0	6808400	0	0	0	0	0	0	0	11155000	8794300	16796000	12146000	4656500000	38863000	113610000	84809000	68611000	35797000	81379000	0	97140000	46863000	37636000	43460000	31293000	35078000	21996000	108970000	94025000	30190000
Q07793;Q92393;Q12414;Q12316;Q12269;Q12141;Q12088;Q04711;Q04670;Q03855;Q03619;Q03612;Q03434;P47100;P47098;P0C2J1;P0C2I9;P0C2I7;P0C2I6;P0C2I5;P0C2I3;P0C2I2;Q12193;P0C2J0;O13535;Q99337;Q99231;Q12273;Q6Q5H1;Q12485;Q12470;Q12217;Q12085;Q04706;Q03856;P47099;P0CX76;P0CX75;P0CX74;P0CX73;P0CX72;P0CX71;P0CX70;P0CX69;P0CX68;P0CX67;P0CX66;P0CX65;P0CX60;P0CX59;P0CX58;P0CX57;P0C2I8;O74302;P0C2I4;Q12441;Q92392;…	Transposon Ty1-DR4 Gag-Pol polyprotein;Capsid protein;Ty1 protease;Integrase;Reverse transcriptase/ribonuclease H;Transposon Ty1-OR Gag-Pol polyprotein;Capsid protein;Ty1 protease;Integrase;Reverse transcriptase/ribonuclease H;Transposon Ty1-PL Gag-Pol polyprotein;Capsid protein;Ty1 protease;Integrase;Reverse transcriptase/ribonuclease H;Transposon Ty1-GR3 Gag-Pol polyprotein;Capsid protein;Ty1 p…	TY1B-DR4;TY1B-OR;TY1B-PL;TY1B-GR3;TY1B-GR2;TY1B-GR1;TY1B-LR1;TY1B-ML1;TY1B-MR2;TY1B-DR1;TY1B-ER2;TY1B-ER1;TY1B-ML2;TY1B-JR2;TY1B-JR1;TY1B-PR3;TY1B-PR1;TY1B-LR4;TY1B-LR3;TY1B-LR2;TY1B-DR6;TY1B-DR5;TY1B-BR;TY1B-PR2;TY1B-H;TY1B-NL2;TY1B-DR3;TY1B-OL;TY1A-PR3;TY1A-GR2;TY1A-NL2;TY1A-BR;TY1A-GR1;TY1A-ML1;TY1A-DR1;TY1A-JR2;TY1A-ML2;TY1A-LR3;TY1A-JR1;TY1A-PL;TY1A-LR2;TY1A-ER1;TY1A-DR6;TY1A-MR2;TY1A-LR1;TY…	sp|Q07793|YD13B_YEAST Transposon Ty1-DR4 Gag-Pol polyprotein OS=Saccharomyces cerevisiae (strain ATCC 204508 / S288c) GN=TY1B-DR4 PE=3 SV=2;sp|Q92393|YO12B_YEAST Transposon Ty1-OR Gag-Pol polyprotein OS=Saccharomyces cerevisiae (strain ATCC 204508 / S288c)	65	6	5.1	181.66	1604	0	34.114	613430000	416170	0	0	10269000	1149300	0	0	11970000	0	0	0	2428400	180530	0	3284700	7212200	0	837000	532350	0	37876000	11173000	21699000	8374900	83645000	16806000	68791000	87608000	10793000	11800000	3481600	17500000	53890000	9762600	21672000	2741100	73568000	23915000
Q06549	Cytidine deaminase	CDD1	sp|Q06549|CDD_YEAST Cytidine deaminase OS=Saccharomyces cerevisiae (strain ATCC 204508 / S288c) GN=CDD1 PE=1 SV=1	1	1	6.3	15.536	142	0	2.9463	113490000	0	0	1195600	0	4174700	8669700	3885000	0	0	0	0	0	0	2463600	0	0	0	0	0	0	5504600	22162000	0	0	0	0	4570800	1272300	0	1733400	0	0	0	0	21561000	10725000	0	6627300
Q12154	ATPase GET3	GET3	sp|Q12154|GET3_YEAST ATPase GET3 OS=Saccharomyces cerevisiae (strain ATCC 204508 / S288c) GN=GET3 PE=1 SV=1	1	14	43.2	39.353	354	0	305.92	2783300000	0	0	17053000	0	0	0	2208900	27983000	0	0	0	0	0	0	0	0	0	0	0	0	0	0	3728700	1444800	0	1607200000	700170000	67197000	30384000	37386000	21088000	60651000	39284000	16286000	21040000	7407700	13944000	4287800
P38249	Eukaryotic translation initiation factor 3 subunit A	RPG1	sp|P38249|EIF3A_YEAST Eukaryotic translation initiation factor 3 subunit A OS=Saccharomyces cerevisiae (strain ATCC 204508 / S288c) GN=RPG1 PE=1 SV=1	1	46	44.6	110.34	964	0	323.31	4325600000	1854900	0	0	9244000	23743000	9916300	4815100	20045000	5668900	0	456990	3310300	785560	1128200	2748700000	174520000	29851000	34168000	172420000	104820000	51367000	161750000	115780000	74515000	36855000	108730000	132600000	34787000	37562000	52660000	10401000	14954000	8574000	9444800	21019000	5922100	87031000	4545800
P38431	Eukaryotic translation initiation factor 5	TIF5	sp|P38431|IF5_YEAST Eukaryotic translation initiation factor 5 OS=Saccharomyces cerevisiae (strain ATCC 204508 / S288c) GN=TIF5 PE=1 SV=1	1	10	29.1	45.261	405	0	53.468	2356000000	19805000	16408000	14343000	184360000	0	0	140350000	968730	0	0	0	0	0	406940	406910	161980000	0	0	0	83454000	4648500	0	131650000	0	7908700	7171800	4943300	1182100000	0	33317000	11552000	15212000	39732000	27479000	21001000	149260000	47284000	29401000
Q03784	Trafficking protein particle complex subunit 23	TRS23	sp|Q03784|TRS23_YEAST Trafficking protein particle complex subunit 23 OS=Saccharomyces cerevisiae (strain ATCC 204508 / S288c) GN=TRS23 PE=1 SV=1	1	3	17.8	24.863	219	0	9.5174	21266000	0	0	0	393680	0	0	0	0	0	0	0	0	0	0	0	0	0	0	0	0	0	0	0	0	0	0	0	0	0	0	0	0	0	0	20872000	0	0	0
Q05775	Eukaryotic translation initiation factor 3 subunit J	HCR1	sp|Q05775|EIF3J_YEAST Eukaryotic translation initiation factor 3 subunit J OS=Saccharomyces cerevisiae (strain ATCC 204508 / S288c) GN=HCR1 PE=1 SV=1	1	1	4.2	29.564	265	0.00068259	2.6639	41185000	0	0	0	0	0	0	0	0	5665200	0	0	0	0	0	0	0	0	0	0	0	0	0	0	0	0	0	0	0	10040000	4711800	0	0	0	0	20768000	0	0	0
P09733	Tubulin alpha-1 chain	TUB1	sp|P09733|TBA1_YEAST Tubulin alpha-1 chain OS=Saccharomyces cerevisiae (strain ATCC 204508 / S288c) GN=TUB1 PE=1 SV=2	1	11	26.6	49.799	447	0	250.81	1260700000	0	0	0	0	0	0	0	0	0	0	3957900	0	0	11141000	0	0	0	950390	0	0	0	861890	1846900	0	1092000000	1632300	6238900	10976000	19628000	16266000	5121300	1653100	1568900	2296000	20738000	12119000	33250000	2299300
P13188	Glutamine--tRNA ligase	GLN4	sp|P13188|SYQ_YEAST Glutamine--tRNA ligase OS=Saccharomyces cerevisiae (strain ATCC 204508 / S288c) GN=GLN4 PE=1 SV=2	1	5	5.8	93.132	809	0	8.1472	125710000	0	0	0	22905000	0	0	2362600	0	0	0	0	427000	6655600	0	0	1811500	2249300	5453200	8449300	0	9422400	16556000	2609000	1734100	3393500	1591700	4709000	1915900	0	0	2257900	0	2013300	1483900	20394000	4398500	2202400	0
Q08909	Uncharacterized protein YOR385W	YOR385W	sp|Q08909|YO385_YEAST Uncharacterized protein YOR385W OS=Saccharomyces cerevisiae (strain ATCC 204508 / S288c) GN=YOR385W PE=1 SV=1	1	10	34.1	34.063	290	0	78.738	832260000	0	0	0	0	0	0	0	0	0	0	0	0	0	0	0	2511200	870020	0	0	0	0	0	15320000	0	0	0	0	0	9297700	622840000	62660000	18990000	11570000	18365000	20180000	21177000	6808900	1667100
Q06408	Transaminated amino acid decarboxylase	ARO10	sp|Q06408|ARO10_YEAST Transaminated amino acid decarboxylase OS=Saccharomyces cerevisiae (strain ATCC 204508 / S288c) GN=ARO10 PE=1 SV=1	1	17	26.3	71.384	635	0	184.93	1680600000	10084000	1884800	3321500	0	30218000	3855500	10863000	2941600	0	0	5384200	0	0	0	6893700	3411600	1591900	621520	2294400	2906700	1339900000	56045000	14755000	8690000	25771000	0	14032000	0	1419800	30204000	946430	5358100	4006200	6308300	19902000	8592100	31885000	3647100
P16861	ATP-dependent 6-phosphofructokinase subunit alpha	PFK1	sp|P16861|PFKA1_YEAST ATP-dependent 6-phosphofructokinase subunit alpha OS=Saccharomyces cerevisiae (strain ATCC 204508 / S288c) GN=PFK1 PE=1 SV=1	1	15	17.5	107.97	987	0	96.141	767550000	0	2715700	635950	2619600	463360	0	2115600	0	2394400	0	0	0	0	0	68772000	34583000	254050000	109250000	26419000	10425000	29310000	34032000	26783000	15777000	2100000	4337400	12782000	2708000	9954400	11840000	6810400	7303200	7059300	2883700	19756000	9701000	22282000	10317000
P32465;P38695	Low-affinity glucose transporter HXT1	HXT1	sp|P32465|HXT1_YEAST Low-affinity glucose transporter HXT1 OS=Saccharomyces cerevisiae (strain ATCC 204508 / S288c) GN=HXT1 PE=1 SV=1	2	4	6.8	63.261	570	0	25.316	460100000	0	0	0	29958000	11484000	23999000	58828000	0	0	0	0	0	0	0	0	0	0	0	0	0	0	0	13937000	0	0	5636500	0	271450000	25369000	0	0	0	0	0	19437000	0	0	0
P14540	Fructose-bisphosphate aldolase	FBA1	sp|P14540|ALF_YEAST Fructose-bisphosphate aldolase OS=Saccharomyces cerevisiae (strain ATCC 204508 / S288c) GN=FBA1 PE=1 SV=3	1	14	43.7	39.62	359	0	323.31	9743200000	0	0	0	0	0	5531000	880800	70901000	0	0	0	0	0	0	11324000	1372200	36449000	4253400	12658000	2142000	16526000	25063000	13143000	18157000	18309000	6491000000	1259300000	214090000	257080000	582800000	67220000	75987000	107090000	114720000	19297000	57141000	153800000	71437000
P39715	Shuttling pre-60S factor ECM1	ECM1	sp|P39715|ECM1_YEAST Shuttling pre-60S factor ECM1 OS=Saccharomyces cerevisiae (strain ATCC 204508 / S288c) GN=ECM1 PE=1 SV=2	1	3	13.7	23.891	212	0	40.064	93285000	0	0	0	0	0	0	0	0	0	0	0	0	0	0	0	0	0	0	0	0	0	0	0	0	7011400	3190600	7370000	3391900	5078800	14808000	0	0	1797000	27511000	19046000	0	4079900	0
P48234	Ribosome biogenesis protein ENP2	ENP2	sp|P48234|NOL10_YEAST Ribosome biogenesis protein ENP2 OS=Saccharomyces cerevisiae (strain ATCC 204508 / S288c) GN=ENP2 PE=1 SV=2	1	11	18.4	81.733	707	0	141.6	704530000	0	0	0	0	0	0	0	2206400	0	0	0	0	0	0	0	0	293550000	36452000	14554000	7464500	182420000	1413600	62584000	21842000	10854000	7362200	0	0	7888200	0	0	8222400	0	0	18967000	23307000	4694400	0
Q01080	DNA-directed RNA polymerase I subunit RPA49	RPA49	sp|Q01080|RPA49_YEAST DNA-directed RNA polymerase I subunit RPA49 OS=Saccharomyces cerevisiae (strain ATCC 204508 / S288c) GN=RPA49 PE=1 SV=2	1	12	31.1	46.65	415	0	235.31	666270000	56307000	0	327320	2596700	0	457670000	0	0	5845200	0	0	0	2363000	1773700	1229500	0	2905900	4104800	3396300	0	0	0	2671100	0	0	0	10773000	14062000	6264900	13095000	3274200	22193000	8589500	1323300	18946000	11441000	12342000	0
P40078	Ribosome biogenesis protein NSA2	NSA2	sp|P40078|NSA2_YEAST Ribosome biogenesis protein NSA2 OS=Saccharomyces cerevisiae (strain ATCC 204508 / S288c) GN=NSA2 PE=1 SV=1	1	11	41.4	29.722	261	0	323.31	2090300000	1458300	0	315610	0	0	0	0	0	21281000	0	0	0	267340	0	0	0	0	470170	0	0	0	6390100	0	0	0	152490000	245700000	210570000	425650000	915390000	10011000	12641000	3946600	19978000	18925000	27824000	12594000	3468100
P40517	Ran-specific GTPase-activating protein 2	YRB2	sp|P40517|YRB2_YEAST Ran-specific GTPase-activating protein 2 OS=Saccharomyces cerevisiae (strain ATCC 204508 / S288c) GN=YRB2 PE=1 SV=1	1	2	6.1	36.054	327	0.00068213	2.6633	41952000	964120	0	0	0	0	1818900	0	0	0	0	0	0	0	0	0	0	0	0	0	0	0	0	2934600	0	0	0	0	0	0	0	7041300	2263100	2649100	0	18332000	0	3859600	2089100
Q86ZR7	Putative uncharacterized hydrolase YKL033W-A	YKL033W-A	sp|Q86ZR7|YKD3A_YEAST Putative uncharacterized hydrolase YKL033W-A OS=Saccharomyces cerevisiae (strain ATCC 204508 / S288c) GN=YKL033W-A PE=3 SV=2	1	6	25.4	26.17	236	0	83.029	965100000	0	0	0	0	0	0	0	0	0	0	13784000	19535000	0	0	0	0	1531700	0	0	1027000	0	0	0	4695500	0	22975000	0	6771100	0	3482400	2873700	4501200	280770000	532800000	18037000	10056000	19933000	1910700
P41338	Acetyl-CoA acetyltransferase	ERG10	sp|P41338|THIL_YEAST Acetyl-CoA acetyltransferase OS=Saccharomyces cerevisiae (strain ATCC 204508 / S288c) GN=ERG10 PE=1 SV=3	1	6	17.1	41.728	398	0	30.991	126860000	0	0	0	0	0	22693000	70085000	0	0	0	0	0	0	0	0	0	0	1569200	0	0	0	0	0	0	0	0	0	0	1383500	9853300	0	0	3246800	0	18032000	0	0	0
P38061	60S ribosomal protein L32	RPL32	sp|P38061|RL32_YEAST 60S ribosomal protein L32 OS=Saccharomyces cerevisiae (strain ATCC 204508 / S288c) GN=RPL32 PE=1 SV=1	1	6	40.8	14.771	130	0	155.9	4821200000	3220400	380220	813480	0	0	0	37530000	0	3209100	0	0	0	2097700	0	1406300	0	0	1639300	0	0	665440	1828000	2560900	4479100	2061800	7086000	46023000	29702000	16900000	19518000	22106000	23740000	70108000	121510000	17983000	10535000	4087400000	177250000
P15019	Transaldolase	TAL1	sp|P15019|TAL1_YEAST Transaldolase OS=Saccharomyces cerevisiae (strain ATCC 204508 / S288c) GN=TAL1 PE=1 SV=4	1	15	50.1	37.036	335	0	323.31	2122900000	0	0	0	0	1454600	14838000	0	456540	1110200	0	0	0	646690	0	0	0	0	11187000	3829500	0	2006200	1775700	0	0	7147600	0	827120000	1042700000	82028000	61254000	8718300	12668000	1164600	2879200	17978000	4016400	5102800	2006200
Q05933	Actin-related protein 2/3 complex subunit 3	ARC18	sp|Q05933|ARPC3_YEAST Actin-related protein 2/3 complex subunit 3 OS=Saccharomyces cerevisiae (strain ATCC 204508 / S288c) GN=ARC18 PE=1 SV=1	1	5	29.2	20.578	178	0	167.48	1806100000	1250400	0	0	0	0	0	0	0	0	0	0	650010	599460	522260	0	0	0	0	0	0	0	0	0	13515000	0	0	4644800	201200000	274720000	238400000	0	216430000	0	623700	17463000	20859000	815240000	0
P53252	Sphingolipid long chain base-responsive protein PIL1	PIL1	sp|P53252|PIL1_YEAST Sphingolipid long chain base-responsive protein PIL1 OS=Saccharomyces cerevisiae (strain ATCC 204508 / S288c) GN=PIL1 PE=1 SV=1	1	9	29.8	38.349	339	0	241.31	646280000	0	0	0	0	0	7056900	357950000	0	14634000	0	0	0	0	0	0	1746800	0	0	190840	0	0	0	7529000	6992200	10357000	6730300	22404000	12569000	16901000	19121000	42539000	18203000	70806000	2065700	16864000	2441300	0	7171400
Q03559	Uncharacterized protein YMR295C	YMR295C	sp|Q03559|YM8V_YEAST Uncharacterized protein YMR295C OS=Saccharomyces cerevisiae (strain ATCC 204508 / S288c) GN=YMR295C PE=1 SV=1	1	2	12.7	22.178	197	0	16.361	160180000	0	0	0	0	0	0	0	0	0	0	15998000	0	2352800	0	0	0	0	0	0	0	0	0	0	0	0	0	0	0	0	0	0	0	73032000	26862000	16774000	8469600	9325200	2279600
P21825	Translocation protein SEC62	SEC62	sp|P21825|SEC62_YEAST Translocation protein SEC62 OS=Saccharomyces cerevisiae (strain ATCC 204508 / S288c) GN=SEC62 PE=1 SV=2	1	5	17.5	31.346	274	0	38.991	263670000	0	0	0	0	0	0	0	0	0	0	0	0	0	0	0	0	0	0	0	0	0	0	0	0	0	0	0	0	0	186710	191750000	29409000	1389900	1236800	16473000	0	22928000	292960
Q05022	rRNA biogenesis protein RRP5	RRP5	sp|Q05022|RRP5_YEAST rRNA biogenesis protein RRP5 OS=Saccharomyces cerevisiae (strain ATCC 204508 / S288c) GN=RRP5 PE=1 SV=1	1	1	0.7	193.13	1729	0.0019907	2.3145	383190000	0	0	0	0	107770000	0	0	0	0	0	0	0	0	0	1403500	3554000	10295000	0	0	0	184440000	18841000	22389000	8932900	5959800	0	0	3257700	0	0	0	0	0	0	16354000	0	0	0
P30771	ATP-dependent helicase NAM7	NAM7	sp|P30771|NAM7_YEAST ATP-dependent helicase NAM7 OS=Saccharomyces cerevisiae (strain ATCC 204508 / S288c) GN=NAM7 PE=1 SV=1	1	8	9.5	109.43	971	0	34.883	156220000	0	0	0	0	0	0	0	0	0	0	5557100	986050	0	0	19683000	54195000	6634000	0	2400200	692070	0	0	1692100	2358300	0	0	2162500	0	32492000	5947700	0	2225400	0	0	16288000	2902200	0	0
Q02892	Nucleolar GTP-binding protein 1	NOG1	sp|Q02892|NOG1_YEAST Nucleolar GTP-binding protein 1 OS=Saccharomyces cerevisiae (strain ATCC 204508 / S288c) GN=NOG1 PE=1 SV=1	1	23	35.7	74.409	647	0	147.29	1907000000	0	0	0	4004300	13484000	4721700	10496000	0	8352200	0	0	0	1589900	0	11549000	9578300	10125000	11661000	31466000	54644000	414690000	699630000	127580000	29429000	33799000	36070000	49153000	44211000	132970000	58583000	21351000	5803800	6427600	1589900	15763000	30055000	24399000	3800100
P15180	Lysine--tRNA ligase, cytoplasmic	KRS1	sp|P15180|SYKC_YEAST Lysine--tRNA ligase, cytoplasmic OS=Saccharomyces cerevisiae (strain ATCC 204508 / S288c) GN=KRS1 PE=1 SV=2	1	8	13.4	67.958	591	0	17.995	392280000	0	0	238640	0	49458000	0	0	0	0	0	3178500	0	0	0	4206800	5466800	3695100	1507000	3379800	6200100	68572000	8515500	16739000	5310400	10281000	0	0	29473000	16888000	8555300	7821700	8468300	6113700	4784700	15726000	67221000	38442000	0
Q12265	Ribose-phosphate pyrophosphokinase 5	PRS5	sp|Q12265|KPR5_YEAST Ribose-phosphate pyrophosphokinase 5 OS=Saccharomyces cerevisiae (strain ATCC 204508 / S288c) GN=PRS5 PE=1 SV=1	1	11	35.1	53.504	496	0	323.31	692440000	3810400	5213900	14423000	0	0	0	6466800	0	9536100	0	0	0	12125000	0	0	0	0	0	0	3353500	3569800	0	0	0	226520000	2577500	34003000	0	29931000	91494000	2812100	26568000	12797000	7194800	15529000	17081000	102310000	37318000
P04046	Amidophosphoribosyltransferase	ADE4	sp|P04046|PUR1_YEAST Amidophosphoribosyltransferase OS=Saccharomyces cerevisiae (strain ATCC 204508 / S288c) GN=ADE4 PE=1 SV=2	1	12	23.1	56.719	510	0	61.775	496560000	2133700	1456900	2592600	1665000	0	0	0	0	0	0	0	0	0	0	0	0	3832800	0	1636300	0	0	2639600	7532400	366410000	37387000	2211600	9165800	1457200	3006400	5670100	2037100	2045700	4376400	2085500	15327000	0	11816000	4728900
Q3E792;P0C0T4	40S ribosomal protein S25-A;40S ribosomal protein S25-B	RPS25A;RPS25B	sp|Q3E792|RS25A_YEAST 40S ribosomal protein S25-A OS=Saccharomyces cerevisiae (strain ATCC 204508 / S288c) GN=RPS25A PE=1 SV=1;sp|P0C0T4|RS25B_YEAST 40S ribosomal protein S25-B OS=Saccharomyces cerevisiae (strain ATCC 204508 / S288c) GN=RPS25B PE=1 SV=1	2	4	30.6	12.039	108	0	97.46	3673300000	0	1520100	149410000	0	0	0	0	0	0	0	0	0	1274200	252820000	0	0	0	0	0	0	0	0	0	0	0	0	0	0	0	0	0	0	1345900	7931000	15214000	27130000	98246000	21005000
Q08920	Nuclear cap-binding protein subunit 2	CBC2	sp|Q08920|NCBP2_YEAST Nuclear cap-binding protein subunit 2 OS=Saccharomyces cerevisiae (strain ATCC 204508 / S288c) GN=CBC2 PE=1 SV=1	1	4	18.8	23.774	208	0	26.591	89869000	0	0	0	3382100	3101100	0	0	0	0	0	0	0	0	0	0	0	0	0	0	0	0	0	0	0	0	0	0	0	0	0	0	4808100	11188000	48788000	14596000	3082400	0	0
P30619	Protein transport protein SEC1	SEC1	sp|P30619|SEC1_YEAST Protein transport protein SEC1 OS=Saccharomyces cerevisiae (strain ATCC 204508 / S288c) GN=SEC1 PE=1 SV=1	1	8	12.6	83.479	724	0	31.969	431550000	13528000	19696000	12276000	0	8608000	21598000	26738000	10585000	19331000	0	7376400	4848500	13471000	12200000	11248000	4051800	0	899680	75143000	6961300	0	7832800	20488000	0	0	0	17228000	2954300	14328000	0	8937900	4193700	0	8439200	14495000	15207000	33568000	15321000
P33299	26S protease regulatory subunit 7 homolog	RPT1	sp|P33299|PRS7_YEAST 26S protease regulatory subunit 7 homolog OS=Saccharomyces cerevisiae (strain ATCC 204508 / S288c) GN=RPT1 PE=1 SV=1	1	7	15.8	51.982	467	0	23.997	318450000	0	0	0	0	0	0	0	8802100	0	0	0	0	0	0	0	0	0	0	0	0	5134700	463620	0	15291000	11404000	26232000	2381000	9631600	2837900	817680	73220000	27577000	53541000	34410000	14443000	2306400	12780000	0
P21801	Succinate dehydrogenase [ubiquinone] iron-sulfur subunit, mitochondrial	SDH2	sp|P21801|SDHB_YEAST Succinate dehydrogenase [ubiquinone] iron-sulfur subunit, mitochondrial OS=Saccharomyces cerevisiae (strain ATCC 204508 / S288c) GN=SDH2 PE=1 SV=1	1	2	7.5	30.231	266	0	4.6452	73370000	0	0	0	0	0	0	0	0	0	0	0	0	0	0	0	0	0	0	0	0	0	0	0	0	0	0	0	0	0	0	0	0	27523000	31418000	14428000	0	0	0
P35719	Uncharacterized protein MRP8	MRP8	sp|P35719|MRP8_YEAST Uncharacterized protein MRP8 OS=Saccharomyces cerevisiae (strain ATCC 204508 / S288c) GN=MRP8 PE=1 SV=1	1	14	74	25.097	219	0	323.31	989770000	2749300	0	0	0	558310	2102600	0	0	0	0	13770000	0	0	0	0	0	0	0	0	0	0	0	0	3308500	1461500	0	0	0	1858200	0	3055200	1066600	391100000	517200000	14403000	16608000	14830000	2931900
Q12746	Plasma membrane-associated coenzyme Q6 reductase PGA3	PGA3	sp|Q12746|PGA3_YEAST Plasma membrane-associated coenzyme Q6 reductase PGA3 OS=Saccharomyces cerevisiae (strain ATCC 204508 / S288c) GN=PGA3 PE=1 SV=1	1	10	33	35.287	312	0	245.46	2543700000	0	0	0	0	0	0	0	0	0	0	0	0	0	0	0	0	0	0	0	0	0	0	0	0	0	0	0	0	53929000	2293600000	45501000	30024000	4110700	4694300	14401000	1763200	61204000	19655000
Q01329	Pre-tRNA-processing protein PTA1	PTA1	sp|Q01329|PTA1_YEAST Pre-tRNA-processing protein PTA1 OS=Saccharomyces cerevisiae (strain ATCC 204508 / S288c) GN=PTA1 PE=1 SV=1	1	8	12.2	88.472	785	0	26.067	81555000	0	0	0	0	0	0	0	0	0	0	0	0	0	0	0	2442700	1426700	54975000	1412600	0	0	0	0	0	0	0	2641000	887310	0	1183500	0	0	0	0	14400000	0	2186500	0
P24000	60S ribosomal protein L24-B	RPL24B	sp|P24000|RL24B_YEAST 60S ribosomal protein L24-B OS=Saccharomyces cerevisiae (strain ATCC 204508 / S288c) GN=RPL24B PE=1 SV=1	1	8	32.3	17.547	155	0	32.383	343790000	0	0	0	0	0	0	0	0	0	0	0	0	4475200	0	0	0	0	0	0	0	0	0	7466500	0	0	0	0	0	0	0	3509100	6734100	4610600	7438900	13811000	272780000	4870600	0
Q06350	Sporulation-specific chitinase 2	CTS2	sp|Q06350|CHI2_YEAST Sporulation-specific chitinase 2 OS=Saccharomyces cerevisiae (strain ATCC 204508 / S288c) GN=CTS2 PE=1 SV=1	1	6	13.7	59.117	511	0	96.139	217390000	0	0	32760000	0	0	0	0	0	0	0	0	0	0	0	1119400	0	0	0	0	0	0	0	0	6291800	140590000	0	0	984660	0	0	18527000	0	3076000	0	13747000	290260	0	0
P53941	U3 small nucleolar ribonucleoprotein protein IMP4	IMP4	sp|P53941|IMP4_YEAST U3 small nucleolar ribonucleoprotein protein IMP4 OS=Saccharomyces cerevisiae (strain ATCC 204508 / S288c) GN=IMP4 PE=1 SV=1	1	10	29.3	33.482	290	0	323.31	1154800000	0	0	198430	0	0	0	0	895990	34510000	0	0	0	0	0	0	491130	0	1665800	0	499970	1881300	0	0	4448900	0	0	2088800	974590000	102600000	7761500	0	3487600	2590400	3224300	13483000	0	0	0
Q12452	3-keto-steroid reductase	ERG27	sp|Q12452|ERG27_YEAST 3-keto-steroid reductase OS=Saccharomyces cerevisiae (strain ATCC 204508 / S288c) GN=ERG27 PE=1 SV=1	1	4	12.7	39.724	347	0	23.813	171590000	0	0	0	0	0	0	0	0	0	0	0	0	0	0	0	0	0	2566500	969730	0	0	0	0	0	0	0	0	0	0	68707000	27609000	14075000	2986000	19267000	13395000	0	15902000	6112100
Q04947	Reticulon-like protein 1	RTN1	sp|Q04947|RTN1_YEAST Reticulon-like protein 1 OS=Saccharomyces cerevisiae (strain ATCC 204508 / S288c) GN=RTN1 PE=1 SV=1	1	4	18.3	32.916	295	0	56.682	379800000	1146200	6584400	0	0	0	157620000	0	4613400	0	0	0	0	0	1093100	0	0	0	0	0	0	0	0	0	0	2049900	3086800	43873000	54203000	7694900	5156000	3776500	23834000	3602000	4900400	12671000	1124400	30003000	6893700
P38081	Uncharacterized glycosyl hydrolase YBR056W		sp|P38081|YBQ6_YEAST Uncharacterized glycosyl hydrolase YBR056W OS=Saccharomyces cerevisiae (strain ATCC 204508 / S288c) GN=YBR056W PE=1 SV=1	1	9	15.4	57.821	501	0	92.982	295050000	0	0	0	0	0	0	0	0	0	0	0	0	0	0	811200	0	0	0	0	0	0	0	9974600	247140000	11587000	0	0	7422200	0	0	0	0	0	0	12306000	0	2386900	1480700
P38340	Alpha N-terminal protein methyltransferase 1	TAE1	sp|P38340|NTM1_YEAST Alpha N-terminal protein methyltransferase 1 OS=Saccharomyces cerevisiae (strain ATCC 204508 / S288c) GN=TAE1 PE=1 SV=1	1	6	29.3	26.067	232	0	93.197	489250000	0	3557700	1972000	17087000	0	416750	0	0	1042000	0	0	0	0	0	0	0	0	0	0	0	0	8680200	2096900	2253900	0	0	0	0	0	0	391580000	34924000	742120	0	12297000	0	8067600	2342300
Q12499	Nucleolar protein 58	NOP58	sp|Q12499|NOP58_YEAST Nucleolar protein 58 OS=Saccharomyces cerevisiae (strain ATCC 204508 / S288c) GN=NOP58 PE=1 SV=1	1	16	40.5	56.956	511	0	323.31	1852000000	0	1327900	0	109970000	95144000	58079000	15484000	24105000	7239000	0	0	0	969210	0	144070000	68967000	36179000	17292000	19403000	22188000	50927000	77398000	7473900	10466000	449720000	76677000	100090000	39020000	141740000	88418000	29627000	8635500	9242200	5621900	12020000	14817000	32393000	62415000
P40217	Eukaryotic translation initiation factor 3 subunit I	TIF34	sp|P40217|EIF3I_YEAST Eukaryotic translation initiation factor 3 subunit I OS=Saccharomyces cerevisiae (strain ATCC 204508 / S288c) GN=TIF34 PE=1 SV=1	1	13	51.9	38.755	347	0	323.31	2339900000	0	0	2733200	2555900	1412200	153060000	1770300	160660000	3207300	0	1573100	0	1849900	1682600	11653000	23918000	0	1042400	0	1827000	0	0	0	0	4640100	1672700000	115950000	5549500	0	15669000	93439000	12366000	7506800	3553900	11764000	6841200	13664000	0
P22696	Peptidyl-prolyl cis-trans isomerase ESS1	ESS1	sp|P22696|ESS1_YEAST Peptidyl-prolyl cis-trans isomerase ESS1 OS=Saccharomyces cerevisiae (strain ATCC 204508 / S288c) GN=ESS1 PE=1 SV=3	1	8	51.2	19.404	170	0	173.98	657780000	0	0	0	0	0	0	0	0	0	0	0	0	0	0	0	546060	12179000	0	0	0	0	0	0	0	0	0	3595100	0	0	5744700	0	0	0	0	11596000	544790000	19171000	23057000
Q03503	N-alpha-acetyltransferase 30	MAK3	sp|Q03503|NAA30_YEAST N-alpha-acetyltransferase 30 OS=Saccharomyces cerevisiae (strain ATCC 204508 / S288c) GN=MAK3 PE=1 SV=1	1	8	38.6	20.457	176	0	36.364	396470000	0	0	403400	0	0	0	0	0	0	0	0	0	7430600	0	0	649190	2164500	1290100	0	2004500	0	0	0	0	0	0	0	23667000	0	0	0	15262000	0	0	11592000	307960000	24054000	0
P25296	Calcineurin subunit B	CNB1	sp|P25296|CANB_YEAST Calcineurin subunit B OS=Saccharomyces cerevisiae (strain ATCC 204508 / S288c) GN=CNB1 PE=1 SV=3	1	3	22.9	19.639	175	0	28.225	133800000	0	0	0	0	0	0	0	0	0	0	0	0	0	0	0	0	0	0	0	0	0	0	0	0	0	0	0	0	0	0	0	0	0	0	11558000	0	122240000	0
P21243	Proteasome subunit alpha type-1	SCL1	sp|P21243|PSA1_YEAST Proteasome subunit alpha type-1 OS=Saccharomyces cerevisiae (strain ATCC 204508 / S288c) GN=SCL1 PE=1 SV=1	1	3	13.1	28.001	252	0	3.3483	151750000	0	0	0	0	0	2440400	1065200	0	2227900	0	0	0	5610300	4131200	1745700	2162100	3898900	1729600	1997800	850050	0	0	0	2420000	0	36236000	7531400	3372500	0	6936900	4464400	0	21730000	0	11554000	6563900	7266000	5903900
P39744	Nucleolar complex protein 2	NOC2	sp|P39744|NOC2_YEAST Nucleolar complex protein 2 OS=Saccharomyces cerevisiae (strain ATCC 204508 / S288c) GN=NOC2 PE=1 SV=2	1	29	32.5	81.6	710	0	278.36	2657900000	6824800	0	622140	5403700	909850	90289000	2547300	0	7598600	0	5299500	0	0	252600	2677500	4421700	532810000	1333300000	261480000	35031000	35188000	63086000	39830000	30603000	29244000	72432000	11753000	1850500	2391700	21136000	5698300	15474000	1672800	682450	11514000	0	22965000	0
P36059	ATP-dependent (S)-NAD(P)H-hydrate dehydratase		sp|P36059|NNRD_YEAST ATP-dependent (S)-NAD(P)H-hydrate dehydratase OS=Saccharomyces cerevisiae (strain ATCC 204508 / S288c) GN=YKL151C PE=1 SV=1	1	11	27	37.357	337	0	100.32	1618800000	0	0	0	5043500	0	0	834750	0	21611000	0	0	0	0	0	0	1471100	12459000	19218000	6233900	0	0	2230800	6421300	12376000	16427000	4544600	715460000	694180000	36669000	22534000	5295500	4492600	1642000	0	11452000	0	17169000	0
P53839	Glyoxylate reductase 1	GOR1	sp|P53839|GOR1_YEAST Glyoxylate reductase 1 OS=Saccharomyces cerevisiae (strain ATCC 204508 / S288c) GN=GOR1 PE=1 SV=1	1	11	36.9	38.831	350	0	119.06	822460000	0	0	0	0	4739200	0	0	2652800	0	0	12507000	0	0	0	0	7047900	0	1478900	0	0	1930000	0	1403500	11291000	0	398910000	75298000	84922000	84940000	68589000	5229900	7435500	7822000	0	11339000	14282000	5051700	0
Q12672	60S ribosomal protein L21-B	RPL21B	sp|Q12672|RL21B_YEAST 60S ribosomal protein L21-B OS=Saccharomyces cerevisiae (strain ATCC 204508 / S288c) GN=RPL21B PE=1 SV=1	1	6	41.9	18.274	160	0	22.461	352070000	0	0	0	0	0	0	0	0	0	0	0	0	21514000	0	0	0	0	0	0	0	0	0	0	0	0	1508500	991770	1808400	3671700	0	3167500	5976000	4819700	6346900	11323000	229400000	20498000	34571000
P09064	Eukaryotic translation initiation factor 2 subunit beta	SUI3	sp|P09064|IF2B_YEAST Eukaryotic translation initiation factor 2 subunit beta OS=Saccharomyces cerevisiae (strain ATCC 204508 / S288c) GN=SUI3 PE=1 SV=2	1	5	16.5	31.574	285	0	40.037	137560000	0	0	0	0	0	0	0	0	8147300	0	0	0	0	0	0	0	0	0	0	0	0	0	0	0	0	0	0	15896000	70602000	9276400	0	2661500	10458000	8580000	11237000	702070	0	0
Q03071	Elongin-C	ELC1	sp|Q03071|ELOC_YEAST Elongin-C OS=Saccharomyces cerevisiae (strain ATCC 204508 / S288c) GN=ELC1 PE=1 SV=1	1	2	20.2	11.328	99	0	6.1849	35456000	0	0	0	0	0	0	0	0	0	0	0	0	0	0	0	0	0	0	0	0	0	0	0	0	0	0	0	0	0	0	0	0	0	0	11205000	0	1216000	0
Q03362	Uncharacterized protein YDR476C	YDR476C	sp|Q03362|YD476_YEAST Uncharacterized protein YDR476C OS=Saccharomyces cerevisiae (strain ATCC 204508 / S288c) GN=YDR476C PE=1 SV=1	1	1	6.2	25.265	224	0	22.279	11151000	0	0	0	0	0	0	0	0	0	0	0	0	0	0	0	0	0	0	0	0	0	0	0	0	0	0	0	0	0	0	0	0	0	0	11151000	0	0	0
P47150	37S ribosomal protein S7, mitochondrial	RSM7	sp|P47150|RT07_YEAST 37S ribosomal protein S7, mitochondrial OS=Saccharomyces cerevisiae (strain ATCC 204508 / S288c) GN=RSM7 PE=1 SV=1	1	8	38.5	27.816	247	0	35.565	209140000	0	0	0	0	0	0	0	0	0	0	0	0	0	0	0	0	0	0	0	1232700	0	0	2475400	0	0	0	0	0	2064800	8390300	2541200	0	17585000	162770000	11059000	0	0	1021900
P52910	Acetyl-coenzyme A synthetase 2	ACS2	sp|P52910|ACS2_YEAST Acetyl-coenzyme A synthetase 2 OS=Saccharomyces cerevisiae (strain ATCC 204508 / S288c) GN=ACS2 PE=1 SV=1	1	18	29.9	75.491	683	0	211	1806000000	0	0	1138800	1790400	11828000	15127000	5330000	336830	0	0	997680	0	0	402900	4448500	3956400	17642000	5052000	30062000	86855000	89735000	121870000	270530000	382870000	39447000	46547000	294790000	8972700	9072000	6503900	34008000	15806000	37106000	4901300	10936000	11408000	54882000	65072000
P43591	ATP-dependent kinase YFH7	YFH7	sp|P43591|YFH7_YEAST ATP-dependent kinase YFH7 OS=Saccharomyces cerevisiae (strain ATCC 204508 / S288c) GN=YFH7 PE=1 SV=1	1	9	29.2	39.885	353	0	183.8	342950000	0	0	0	0	0	0	0	0	0	0	0	0	2555100	0	0	0	0	0	0	0	596180	0	0	0	0	0	104160000	176210000	9406100	0	5412500	2785300	0	1849700	10582000	25065000	2711100	0
P16892	Mitogen-activated protein kinase FUS3	FUS3	sp|P16892|FUS3_YEAST Mitogen-activated protein kinase FUS3 OS=Saccharomyces cerevisiae (strain ATCC 204508 / S288c) GN=FUS3 PE=1 SV=2	1	13	47.9	40.772	353	0	140.02	2000100000	0	0	0	0	0	0	2860300	218650000	1792700	0	0	0	0	0	0	4128200	0	0	0	0	0	0	0	0	664670	1095100000	511420000	17026000	45141000	39488000	4398400	9621400	2492400	1877100	10567000	2765100	21798000	6650700
P32772	Protein UGX2	UGX2	sp|P32772|UGX2_YEAST Protein UGX2 OS=Saccharomyces cerevisiae (strain ATCC 204508 / S288c) GN=UGX2 PE=1 SV=2	1	4	26	25.732	223	0	232.09	741270000	0	0	0	0	0	0	0	0	0	0	0	0	0	0	0	0	0	0	0	0	0	0	0	0	0	0	0	0	0	1285100	711540000	10373000	0	1345000	10373000	1528000	3724500	1099300
Q08224;Q08975;Q06490	Hydroxymethylpyrimidine/phosphomethylpyrimidine kinase THI20	THI20	sp|Q08224|THI20_YEAST Hydroxymethylpyrimidine/phosphomethylpyrimidine kinase THI20 OS=Saccharomyces cerevisiae (strain ATCC 204508 / S288c) GN=THI20 PE=1 SV=1	3	8	15.6	61.269	551	0	97.279	662900000	10732000	0	0	3560200	0	0	0	0	3795700	0	0	0	7846600	0	0	3914900	0	0	0	8812800	0	3108000	30746000	330450000	9350300	5122000	73031000	13296000	8938000	25630000	12255000	23962000	20395000	8729500	10336000	35341000	7882100	0
P10591	Heat shock protein SSA1	SSA1	sp|P10591|HSP71_YEAST Heat shock protein SSA1 OS=Saccharomyces cerevisiae (strain ATCC 204508 / S288c) GN=SSA1 PE=1 SV=4	1	40	56.5	69.656	642	0	323.31	5842500000	0	0	0	0	4729500000	60501000	9934600	5071800	16830000	0	0	0	0	0	6720400	3331400	3814500	3505100	1038300	4091800	278490000	114340000	35856000	25209000	22553000	169260000	76418000	44499000	31060000	14974000	76846000	8694400	14578000	7344000	10129000	5973500	48754000	0
P41819	Dimethyladenosine transferase	DIM1	sp|P41819|DIM1_YEAST Dimethyladenosine transferase OS=Saccharomyces cerevisiae (strain ATCC 204508 / S288c) GN=DIM1 PE=3 SV=1	1	17	53.8	35.95	318	0	323.31	2036900000	0	0	0	0	2197100	1607000	5445000	2081900	50612000	0	0	0	710110	1485300	7762300	0	0	0	0	0	16936000	2204700	0	1782100	0	0	51582000	19570000	1495300000	309660000	5080200	26572000	13232000	6151200	10078000	1678600	4375500	0
P53261	Pescadillo homolog	NOP7	sp|P53261|PESC_YEAST Pescadillo homolog OS=Saccharomyces cerevisiae (strain ATCC 204508 / S288c) GN=NOP7 PE=1 SV=1	1	20	29.4	69.876	605	0	309.56	1349500000	0	0	0	7001700	9615500	15808000	2447700	0	1596300	0	0	0	1193500	0	8167400	1661600	2649600	8991100	54015000	476110000	18095000	17953000	185240000	13137000	19860000	7731500	83017000	29699000	84241000	186050000	34898000	18063000	0	1004100	9999100	1905400	29474000	11485000
Q12157	Anaphase-promoting complex subunit 11	APC11	sp|Q12157|APC11_YEAST Anaphase-promoting complex subunit 11 OS=Saccharomyces cerevisiae (strain ATCC 204508 / S288c) GN=APC11 PE=1 SV=1	1	4	24.2	18.865	165	0	40.173	275700000	0	0	0	0	0	0	0	0	0	0	1368200	0	43773000	0	0	0	0	0	0	0	16037000	1372600	0	8665700	0	6414200	0	0	0	6374100	0	2232100	0	0	9887000	171700000	5341700	0
P32074	Coatomer subunit gamma	SEC21	sp|P32074|COPG_YEAST Coatomer subunit gamma OS=Saccharomyces cerevisiae (strain ATCC 204508 / S288c) GN=SEC21 PE=1 SV=2	1	30	31.8	104.83	935	0	323.31	2659000000	0	664940	668300	6276500	988120	3664300	0	993830	3057200	0	0	0	538190	0	14088000	1259800000	7292100	13325000	7468400	17991000	335130000	213810000	378700000	167120000	32255000	0	11420000	9591300	17642000	53117000	24928000	23780000	1479900	0	9883000	1398900	38380000	1409800
P36019	GTP-binding protein YPT53	YPT53	sp|P36019|YPT53_YEAST GTP-binding protein YPT53 OS=Saccharomyces cerevisiae (strain ATCC 204508 / S288c) GN=YPT53 PE=1 SV=1	1	4	21.8	24.647	220	0	4.2758	1745800000	770860000	0	0	0	0	0	2849400	0	0	0	0	0	0	0	0	0	0	0	0	934420000	0	2467800	0	0	0	0	0	0	0	0	0	0	9456000	14228000	9806100	0	0	1675700
Q04689	Altered inheritance of mitochondria protein 32	AIM32	sp|Q04689|AIM32_YEAST Altered inheritance of mitochondria protein 32 OS=Saccharomyces cerevisiae (strain ATCC 204508 / S288c) GN=AIM32 PE=3 SV=1	1	4	12.2	35.977	311	0	23.195	112980000	0	0	0	0	0	0	0	0	0	0	0	0	0	0	0	0	0	0	0	0	0	0	0	0	0	0	0	0	5107700	74172000	0	2223700	10257000	11568000	9648700	0	0	0
P00899	Anthranilate synthase component 1	TRP2	sp|P00899|TRPE_YEAST Anthranilate synthase component 1 OS=Saccharomyces cerevisiae (strain ATCC 204508 / S288c) GN=TRP2 PE=1 SV=4	1	18	40	56.767	507	0	323.31	1465700000	0	0	0	1728500	12459000	0	9967500	0	0	0	0	2008400	0	0	4789000	1095500	7780100	0	0	5466300	702610	0	18594000	1227100000	11050000	3299300	15767000	18502000	9499700	24527000	5715900	6745600	3124600	13823000	9613800	8259800	21188000	8229000
Q12031	Mitochondrial 2-methylisocitrate lyase	ICL2	sp|Q12031|ACEB_YEAST Mitochondrial 2-methylisocitrate lyase OS=Saccharomyces cerevisiae (strain ATCC 204508 / S288c) GN=ICL2 PE=1 SV=1	1	1	1.7	64.975	575	0.00068166	2.6621	12945000	0	0	0	0	0	0	0	0	0	0	0	0	0	0	0	0	0	0	0	0	0	0	0	0	0	0	3453800	0	0	0	0	0	0	0	9491400	0	0	0
P38064	54S ribosomal protein L16, mitochondrial	MRPL16	sp|P38064|RM16_YEAST 54S ribosomal protein L16, mitochondrial OS=Saccharomyces cerevisiae (strain ATCC 204508 / S288c) GN=MRPL16 PE=1 SV=1	1	1	3	26.518	232	0.0026455	2.2951	58008000	0	0	0	0	0	0	0	0	0	0	0	0	0	3767000	0	0	0	0	0	0	0	0	0	0	0	0	0	0	0	0	0	0	0	1601900	9409600	0	7320300	35909000
P35180	Mitochondrial import receptor subunit TOM20	TOM20	sp|P35180|TOM20_YEAST Mitochondrial import receptor subunit TOM20 OS=Saccharomyces cerevisiae (strain ATCC 204508 / S288c) GN=TOM20 PE=1 SV=1	1	1	9.3	20.317	183	0	8.8465	9307200	0	0	0	0	0	0	0	0	0	0	0	0	0	0	0	0	0	0	0	0	0	0	0	0	0	0	0	0	0	0	0	0	0	0	9307200	0	0	0
P07278	cAMP-dependent protein kinase regulatory subunit	BCY1	sp|P07278|KAPR_YEAST cAMP-dependent protein kinase regulatory subunit OS=Saccharomyces cerevisiae (strain ATCC 204508 / S288c) GN=BCY1 PE=1 SV=4	1	6	14.2	47.218	416	0	25.031	628120000	0	0	0	0	0	16729000	19107000	17857000	3411800	0	0	0	0	0	0	0	0	0	0	1636500	0	0	1011400	0	6952600	79149000	180980000	29364000	56809000	120810000	21023000	10516000	12160000	19460000	9260200	4872600	11435000	0
P53336	Putative methyltransferase YGR283C	YGR283C	sp|P53336|YG5X_YEAST Putative methyltransferase YGR283C OS=Saccharomyces cerevisiae (strain ATCC 204508 / S288c) GN=YGR283C PE=1 SV=1	1	5	20.5	38.546	341	0	222.64	157330000	0	0	0	0	0	0	0	1156100	531860	0	0	0	0	0	1741000	0	0	0	0	0	0	0	0	0	0	0	110480000	23093000	3125200	3442500	0	0	0	0	9257600	0	0	1611500
P37291;P37292	Serine hydroxymethyltransferase, cytosolic	SHM2	sp|P37291|GLYC_YEAST Serine hydroxymethyltransferase, cytosolic OS=Saccharomyces cerevisiae (strain ATCC 204508 / S288c) GN=SHM2 PE=1 SV=2	2	9	18.6	52.218	469	0	45.056	396400000	0	0	0	0	0	0	0	0	653800	0	0	0	0	0	0	735320	0	0	0	0	0	869480	0	0	55693000	10269000	42185000	20642000	39498000	66293000	6285400	11064000	31193000	12420000	9093000	14546000	40028000	11687000
P38630	Replication factor C subunit 1	RFC1	sp|P38630|RFC1_YEAST Replication factor C subunit 1 OS=Saccharomyces cerevisiae (strain ATCC 204508 / S288c) GN=RFC1 PE=1 SV=1	1	21	26.5	94.902	861	0	142.91	553650000	0	0	0	4244700	0	0	0	0	9425600	0	0	2584400	0	0	21813000	355430000	2942600	7297000	26737000	14415000	7934200	17121000	4785600	22232000	7630500	4802700	2209600	10625000	6523900	115550	4039900	0	0	1288000	9083900	7824900	0	0
P54005	Protein DIA1	DIA1	sp|P54005|DIA1_YEAST Protein DIA1 OS=Saccharomyces cerevisiae (strain ATCC 204508 / S288c) GN=DIA1 PE=1 SV=1	1	7	20.5	38.76	336	0	46.736	296180000	0	0	0	0	0	0	0	0	0	0	0	0	0	0	0	1022400	0	0	0	0	3713400	0	0	0	1672700	0	0	12460000	191520000	57370000	2185800	1991600	0	0	8956300	4545000	0	0
P38314	Protein SDS24	SDS24	sp|P38314|SDS24_YEAST Protein SDS24 OS=Saccharomyces cerevisiae (strain ATCC 204508 / S288c) GN=SDS24 PE=1 SV=1	1	8	19	57.187	527	0	95.092	953920000	0	0	0	0	0	0	327840	0	0	0	9651500	0	3340000	0	0	0	0	0	796120	569670	3104200	86189000	59525000	98638000	100230000	58372000	112840000	130820000	151650000	55604000	11178000	9817100	4919800	5554200	8925600	17457000	6101800	7363200
P25651	Monopolin complex subunit CSM1	CSM1	sp|P25651|CSM1_YEAST Monopolin complex subunit CSM1 OS=Saccharomyces cerevisiae (strain ATCC 204508 / S288c) GN=CSM1 PE=1 SV=1	1	1	7.9	21.751	190	0.00068074	2.6596	8842800	0	0	0	0	0	0	0	0	0	0	0	0	0	0	0	0	0	0	0	0	0	0	0	0	0	0	0	0	0	0	0	0	0	0	8842800	0	0	0
P40483	Putative zinc metalloproteinase YIL108W	YIL108W	sp|P40483|YIK8_YEAST Putative zinc metalloproteinase YIL108W OS=Saccharomyces cerevisiae (strain ATCC 204508 / S288c) GN=YIL108W PE=1 SV=1	1	5	8.5	77.413	696	0	10.875	119290000	0	0	0	0	4259600	1478200	1014300	0	0	0	0	0	0	0	0	0	0	574210	964240	1576600	1200200	35765000	56823000	0	0	0	0	0	0	4014600	0	0	0	351540	8806800	0	1595000	0
P25694	Cell division control protein 48	CDC48	sp|P25694|CDC48_YEAST Cell division control protein 48 OS=Saccharomyces cerevisiae (strain ATCC 204508 / S288c) GN=CDC48 PE=1 SV=3	1	19	27.8	91.995	835	0	196.69	500340000	0	0	0	314840	0	0	0	0	3055000	0	0	0	0	0	701970	288820000	8660100	15378000	18422000	1197900	10250000	5637500	9926500	12452000	12558000	2243800	1111900	0	2011900	4727200	0	5039400	1324800	2508700	8643100	6734100	53207000	6672900
P32477	Glutamate--cysteine ligase	GSH1	sp|P32477|GSH1_YEAST Glutamate--cysteine ligase OS=Saccharomyces cerevisiae (strain ATCC 204508 / S288c) GN=GSH1 PE=1 SV=1	1	8	13.3	78.253	678	0	22.662	216210000	0	0	0	2865100	0	0	0	0	0	0	0	0	0	0	0	0	0	1901600	9603600	71961000	0	0	0	0	1530900	43167000	34676000	901900	3895000	3019100	3750300	5751200	12415000	2766800	8577300	3418600	0	3253000
P39935;P39936	Eukaryotic initiation factor 4F subunit p150	TIF4631	sp|P39935|IF4F1_YEAST Eukaryotic initiation factor 4F subunit p150 OS=Saccharomyces cerevisiae (strain ATCC 204508 / S288c) GN=TIF4631 PE=1 SV=2	2	8	8.3	107.1	952	0	28.766	411260000	0	0	0	577750	13713000	0	0	0	0	0	0	0	0	0	29489000	10446000	6544000	607380	13048000	958230	2845500	24645000	88559000	22173000	74672000	6220300	5882300	10162000	16991000	11039000	6260200	30896000	8101800	2872500	8499000	4538100	4038200	6787200
Q12090	RNA exonuclease 3	REX3	sp|Q12090|REXO3_YEAST RNA exonuclease 3 OS=Saccharomyces cerevisiae (strain ATCC 204508 / S288c) GN=REX3 PE=1 SV=1	1	5	12.9	45.879	404	0	27.009	522080000	0	0	0	0	0	0	2026600	0	0	0	0	0	0	0	0	0	0	0	0	0	0	0	0	7308000	0	0	8187200	99228000	0	2326900	195850000	104750000	50227000	31468000	8445500	0	12273000	0
P29055	Transcription initiation factor IIB	SUA7	sp|P29055|TF2B_YEAST Transcription initiation factor IIB OS=Saccharomyces cerevisiae (strain ATCC 204508 / S288c) GN=SUA7 PE=1 SV=1	1	7	25.2	38.2	345	0	323.31	836960000	0	0	1248900	0	3953900	0	0	2935800	2808500	0	0	3841000	0	0	0	2622900	3123000	2576500	3931500	0	120120000	4506400	6380600	4048700	2101200	2617400	513570000	105660000	3917900	4174000	5570000	2390300	3810700	5137300	8393700	0	4360700	1842200
Q12176	Ribosome biogenesis protein MAK21	MAK21	sp|Q12176|MAK21_YEAST Ribosome biogenesis protein MAK21 OS=Saccharomyces cerevisiae (strain ATCC 204508 / S288c) GN=MAK21 PE=1 SV=1	1	8	8.5	116.68	1025	0	21.413	207240000	0	0	0	0	0	0	0	723680	0	0	0	0	0	0	50468000	32435000	6144200	7068600	7710800	9696300	47817000	0	0	3700900	3328900	2123200	9621800	0	3392100	624840	0	4171900	7254200	2653300	8305700	0	0	0
P47155	Protein ILM1	ILM1	sp|P47155|ILM1_YEAST Protein ILM1 OS=Saccharomyces cerevisiae (strain ATCC 204508 / S288c) GN=ILM1 PE=1 SV=1	1	1	4.4	23.644	203	0.0020107	2.4449	8142700	0	0	0	0	0	0	0	0	0	0	0	0	0	0	0	0	0	0	0	0	0	0	0	0	0	0	0	0	0	0	0	0	0	0	8142700	0	0	0
P38779	Proteasome-interacting protein CIC1	CIC1	sp|P38779|CIC1_YEAST Proteasome-interacting protein CIC1 OS=Saccharomyces cerevisiae (strain ATCC 204508 / S288c) GN=CIC1 PE=1 SV=1	1	11	31.6	42.529	376	0	140.67	605550000	0	335820	0	591880	0	448740000	780740	27250000	0	0	853960	0	372340	0	0	0	0	0	0	1024000	0	4776500	0	14862000	7340000	17425000	17004000	16289000	8315400	24847000	0	2007500	0	0	8119000	0	3312700	0
Q03305	Protein arginine N-methyltransferase 2	RMT2	sp|Q03305|RMT2_YEAST Protein arginine N-methyltransferase 2 OS=Saccharomyces cerevisiae (strain ATCC 204508 / S288c) GN=RMT2 PE=1 SV=1	1	2	4.4	47.469	412	0	4.4341	101870000	0	0	0	1579900	2091900	53144000	1445900	0	0	0	0	0	3172400	0	3028900	4332100	0	483920	995410	851610	0	0	0	0	3263500	4996400	7635200	0	0	0	0	0	0	0	7999200	6853600	0	0
P20449	ATP-dependent RNA helicase DBP5	DBP5	sp|P20449|DBP5_YEAST ATP-dependent RNA helicase DBP5 OS=Saccharomyces cerevisiae (strain ATCC 204508 / S288c) GN=DBP5 PE=1 SV=2	1	5	11.4	53.873	482	0	9.9229	124080000	0	0	0	0	0	0	979320	0	0	0	0	0	0	0	0	0	0	0	0	0	0	0	0	0	34908000	14647000	17157000	9112100	8918200	4773900	4368200	2463000	0	1996700	7994500	8316700	2489300	1119300
P13856	Ras-related protein RSR1	RSR1	sp|P13856|RSR1_YEAST Ras-related protein RSR1 OS=Saccharomyces cerevisiae (strain ATCC 204508 / S288c) GN=RSR1 PE=3 SV=1	1	3	12.5	30.39	272	0	21.801	180280000	0	0	0	2409300	0	0	0	0	2097400	0	0	0	0	0	0	0	0	0	0	4710200	1557600	0	0	14831000	0	0	0	0	0	15144000	23735000	42311000	13927000	38212000	7852700	6595700	6892400	0
P40187	GSY2-interacting protein PIG2	PIG2	sp|P40187|PIG2_YEAST GSY2-interacting protein PIG2 OS=Saccharomyces cerevisiae (strain ATCC 204508 / S288c) GN=PIG2 PE=1 SV=1	1	2	3.2	61.938	538	0	2.8087	10129000	0	0	0	0	0	0	0	0	0	0	0	0	0	0	0	0	0	0	0	0	0	0	0	0	0	0	0	0	0	0	0	0	0	0	7848300	2280600	0	0
P42943	T-complex protein 1 subunit eta	CCT7	sp|P42943|TCPH_YEAST T-complex protein 1 subunit eta OS=Saccharomyces cerevisiae (strain ATCC 204508 / S288c) GN=CCT7 PE=1 SV=1	1	10	20.9	59.735	550	0	116.56	311880000	0	0	3234700	0	0	0	1003300	0	0	0	0	0	0	1378300	0	0	0	0	0	385000	881620	705180	142390000	88378000	12049000	1528700	16997000	322710	4470300	1432100	4044700	10278000	1160200	1485600	7754600	1470200	1677300	0
P54781	Cytochrome P450 61	ERG5	sp|P54781|ERG5_YEAST Cytochrome P450 61 OS=Saccharomyces cerevisiae (strain ATCC 204508 / S288c) GN=ERG5 PE=1 SV=1	1	1	1.5	61.334	538	0.0026076	2.1953	21103000	0	0	922440	0	0	0	0	0	4496500	0	0	0	0	0	0	0	0	0	0	0	0	0	1932900	6060100	0	0	0	0	0	0	0	0	0	0	7690600	0	0	0
P40558	Cytosolic Fe-S cluster assembly factor CFD1	CFD1	sp|P40558|CFD1_YEAST Cytosolic Fe-S cluster assembly factor CFD1 OS=Saccharomyces cerevisiae (strain ATCC 204508 / S288c) GN=CFD1 PE=1 SV=1	1	6	27.6	31.921	293	0	11.125	74765000	0	0	0	0	2762000	0	0	0	0	0	0	0	0	0	0	0	3412600	0	0	0	0	0	0	2386700	0	0	0	1870100	0	53487000	0	0	0	2830500	7665100	0	351450	0
P07257	Cytochrome b-c1 complex subunit 2, mitochondrial	QCR2	sp|P07257|QCR2_YEAST Cytochrome b-c1 complex subunit 2, mitochondrial OS=Saccharomyces cerevisiae (strain ATCC 204508 / S288c) GN=QCR2 PE=1 SV=1	1	11	37.8	40.478	368	0	289.78	963320000	0	0	0	7956100	0	4035700	0	56765000	1703200	0	0	0	0	4197300	0	493330	0	0	0	0	9894300	4397700	0	31067000	10044000	189340000	568550000	11852000	9084900	6216300	7793000	3640200	3285600	2928000	7644000	3783000	6606300	8502500
Q12377	26S proteasome regulatory subunit RPN6	RPN6	sp|Q12377|RPN6_YEAST 26S proteasome regulatory subunit RPN6 OS=Saccharomyces cerevisiae (strain ATCC 204508 / S288c) GN=RPN6 PE=1 SV=3	1	10	21.4	49.773	434	0	66.74	583420000	0	0	0	327440	0	136050000	0	0	0	0	0	0	0	0	0	0	0	0	0	0	2240300	0	0	0	1073300	9102800	35258000	2448900	1342300	4526500	0	0	0	1499900	7541500	8422800	13393000	0
P53215	tRNA(His) guanylyltransferase	THG1	sp|P53215|THG1_YEAST tRNA(His) guanylyltransferase OS=Saccharomyces cerevisiae (strain ATCC 204508 / S288c) GN=THG1 PE=1 SV=1	1	4	16.9	27.757	237	0	10.972	306570000	0	0	1087800	0	0	0	0	0	0	0	0	0	0	0	0	0	0	0	0	2126300	0	0	0	0	0	0	0	0	0	0	0	0	107220000	182070000	7455200	3860400	2761400	0
Q08723	26S proteasome regulatory subunit RPN8	RPN8	sp|Q08723|RPN8_YEAST 26S proteasome regulatory subunit RPN8 OS=Saccharomyces cerevisiae (strain ATCC 204508 / S288c) GN=RPN8 PE=1 SV=3	1	14	50.3	38.312	338	0	192.96	1006900000	0	0	0	3693200	0	0	0	3206900	0	0	0	0	0	0	3140000	0	0	0	0	1039700	0	0	0	0	3072700	806240000	114060000	16550000	20375000	6549500	5634600	3802900	0	0	7430900	4325300	895170	1935700
Q03144	Pyridoxal 5-phosphate synthase subunit SNO1	SNO1	sp|Q03144|SNO1_YEAST Pyridoxal 5-phosphate synthase subunit SNO1 OS=Saccharomyces cerevisiae (strain ATCC 204508 / S288c) GN=SNO1 PE=1 SV=1	1	1	8.5	24.906	224	0	3.3519	7424600	0	0	0	0	0	0	0	0	0	0	0	0	0	0	0	0	0	0	0	0	0	0	0	0	0	0	0	0	0	0	0	0	0	0	7424600	0	0	0
P53289	Protein phosphatase type 2A regulatory subunit RTS3	RTS3	sp|P53289|RTS3_YEAST Protein phosphatase type 2A regulatory subunit RTS3 OS=Saccharomyces cerevisiae (strain ATCC 204508 / S288c) GN=RTS3 PE=1 SV=1	1	4	17.5	29.263	263	0	6.14	91989000	0	0	0	0	0	0	0	0	0	0	0	0	0	0	0	0	0	0	0	0	214680	97040	0	0	0	0	295150	0	696090	1531600	12346000	9139500	16174000	16174000	7362000	5095700	15389000	6016800
P36973	Adenine phosphoribosyltransferase 2	APT2	sp|P36973|APT2_YEAST Adenine phosphoribosyltransferase 2 OS=Saccharomyces cerevisiae (strain ATCC 204508 / S288c) GN=APT2 PE=1 SV=2	1	2	11.6	19.986	181	0	6.2918	89963000	0	0	0	0	0	0	0	0	0	0	0	0	16552000	0	0	1906100	3442700	0	0	0	0	0	0	4747900	5057300	0	12285000	0	700330	0	0	0	0	3294900	7292200	12239000	2674300	18385000
P21576	Vacuolar protein sorting-associated protein 1	VPS1	sp|P21576|VPS1_YEAST Vacuolar protein sorting-associated protein 1 OS=Saccharomyces cerevisiae (strain ATCC 204508 / S288c) GN=VPS1 PE=1 SV=2	1	37	58	78.736	704	0	323.31	11937000000	834300	2212100	0	5986500	106580000	0	943680	337920000	1074400	0	2726300	0	0	1242700	0	6779200	1875100	8021900	2957700000	238070000	585020000	60089000	270050000	43141000	85922000	976690000	42077000	67701000	1498800000	3546700000	5763600	965390000	17908000	13805000	7263600	0	35923000	0
P19146	ADP-ribosylation factor 2	ARF2	sp|P19146|ARF2_YEAST ADP-ribosylation factor 2 OS=Saccharomyces cerevisiae (strain ATCC 204508 / S288c) GN=ARF2 PE=1 SV=3	1	9	60.2	20.657	181	0	134.7	434790000	1972900	569700	920160	0	0	0	0	0	0	0	0	0	11255000	0	0	0	0	0	0	0	0	0	990110	0	0	0	1233000	0	1267700	1929200	0	2113500	0	1129900	7238300	145640000	178500000	10560000
Q12146	DNA replication complex GINS protein PSF3	PSF3	sp|Q12146|PSF3_YEAST DNA replication complex GINS protein PSF3 OS=Saccharomyces cerevisiae (strain ATCC 204508 / S288c) GN=PSF3 PE=1 SV=2	1	1	6.7	21.952	194	0	17.845	7236700	0	0	0	0	0	0	0	0	0	0	0	0	0	0	0	0	0	0	0	0	0	0	0	0	0	0	0	0	0	0	0	0	0	0	7236700	0	0	0
P00546	Cyclin-dependent kinase 1	CDC28	sp|P00546|CDK1_YEAST Cyclin-dependent kinase 1 OS=Saccharomyces cerevisiae (strain ATCC 204508 / S288c) GN=CDC28 PE=1 SV=1	1	15	48	34.061	298	0	263.52	1950700000	0	402870	0	0	0	3440200	700040	0	12594000	0	0	0	390250	0	0	0	0	0	0	0	3047900	6767100	6303000	4423700	0	0	0	2449300	19862000	1594000000	47591000	52238000	18490000	28391000	7190700	1688200	22700000	10104000
P02557	Tubulin beta chain	TUB2	sp|P02557|TBB_YEAST Tubulin beta chain OS=Saccharomyces cerevisiae (strain ATCC 204508 / S288c) GN=TUB2 PE=1 SV=2	1	16	45.5	50.922	457	0	323.31	1297200000	3488500	0	0	0	0	313670	15738000	0	0	0	0	0	0	0	0	1710200	0	0	0	6056400	0	0	237880	14952000	1077800000	4574200	10161000	4824700	5970600	35395000	13656000	6675300	0	1801100	7080000	12354000	55409000	13569000
P25626	54S ribosomal protein IMG1, mitochondrial	IMG1	sp|P25626|IMG1_YEAST 54S ribosomal protein IMG1, mitochondrial OS=Saccharomyces cerevisiae (strain ATCC 204508 / S288c) GN=IMG1 PE=1 SV=1	1	5	34.3	19.393	169	0	61.463	238150000	0	0	0	2519800	0	0	0	0	0	0	0	0	0	0	0	0	0	0	0	0	0	0	0	0	4361700	0	0	0	3114000	0	0	0	0	759850	6801400	25792000	191460000	3334400
P39968	Vacuolar protein 8	VAC8	sp|P39968|VAC8_YEAST Vacuolar protein 8 OS=Saccharomyces cerevisiae (strain ATCC 204508 / S288c) GN=VAC8 PE=1 SV=3	1	5	10	63.207	578	0	37.663	1645700000	0	6843700	0	0	5205300	0	0	10311000	0	0	0	0	309010000	0	358310000	106550000	0	0	0	358750000	196740000	0	121160000	3230600	0	0	0	2302200	0	1346700	0	0	0	1253100	6773300	8345100	10882000	0
P40087	DNA damage-inducible protein 1	DDI1	sp|P40087|DDI1_YEAST DNA damage-inducible protein 1 OS=Saccharomyces cerevisiae (strain ATCC 204508 / S288c) GN=DDI1 PE=1 SV=1	1	3	6.3	47.354	428	0	4.7882	32854000	0	0	0	0	0	22762000	0	0	0	0	0	0	0	0	0	0	0	0	0	0	0	0	0	0	0	0	0	0	0	2538200	0	0	0	0	6763100	0	790670	0
Q12387	N-terminal acetyltransferase B complex subunit MDM20	MDM20	sp|Q12387|NAA25_YEAST N-terminal acetyltransferase B complex subunit MDM20 OS=Saccharomyces cerevisiae (strain ATCC 204508 / S288c) GN=MDM20 PE=1 SV=1	1	13	16.5	92.808	796	0	101.47	590610000	0	3421700	4185900	12737000	21091000	26607000	19596000	18362000	16379000	0	3647500	2576100	3893300	4146800	16902000	11165000	28549000	161850000	25802000	10832000	12803000	13829000	16028000	8627100	12591000	9459200	26977000	26840000	12187000	11956000	11859000	6213600	0	0	6745200	2185800	3540900	0
Q12044	Regulator of calcineurin 2	RCN2	sp|Q12044|RCN2_YEAST Regulator of calcineurin 2 OS=Saccharomyces cerevisiae (strain ATCC 204508 / S288c) GN=RCN2 PE=1 SV=1	1	5	24.5	29.255	265	0	10.505	147170000	0	0	0	0	0	0	0	0	1447700	0	0	0	0	0	0	0	0	0	0	1813900	0	0	0	7693800	0	0	0	0	0	11506000	27865000	22531000	0	1703000	6694100	13202000	13576000	7146500
P12612	T-complex protein 1 subunit alpha	TCP1	sp|P12612|TCPA_YEAST T-complex protein 1 subunit alpha OS=Saccharomyces cerevisiae (strain ATCC 204508 / S288c) GN=TCP1 PE=1 SV=2	1	14	28.8	60.48	559	0	277.48	697570000	0	1075200	0	0	0	0	0	0	0	0	0	0	0	0	0	0	0	0	0	0	26762000	0	552150000	29882000	20145000	0	7539700	8594400	13607000	12806000	0	0	2963900	0	6492400	3408500	11211000	927200
P00958	Methionine--tRNA ligase, cytoplasmic	MES1	sp|P00958|SYMC_YEAST Methionine--tRNA ligase, cytoplasmic OS=Saccharomyces cerevisiae (strain ATCC 204508 / S288c) GN=MES1 PE=1 SV=4	1	28	39.7	85.677	751	0	323.31	2025300000	0	1354400	0	0	10175000	14883000	2673700	15266000	3763200	0	2652000	0	0	0	3118900	0	37631000	528970000	1151000000	21597000	19569000	22898000	22460000	31846000	7366400	51779000	1356800	10659000	2521500	0	0	5106000	0	0	6467400	31578000	17596000	0
P38874	Elongator complex protein 5	IKI1	sp|P38874|ELP5_YEAST Elongator complex protein 5 OS=Saccharomyces cerevisiae (strain ATCC 204508 / S288c) GN=IKI1 PE=1 SV=1	1	5	19.4	35.219	309	0	85.342	543130000	0	0	0	0	0	0	0	0	10166000	0	0	0	0	0	0	0	0	2503300	1929800	0	0	0	0	0	0	0	3132400	189090000	184610000	11436000	71215000	47313000	0	0	6364500	12451000	2364900	0
Q3E705	rRNA-processing protein EFG1	EFG1	sp|Q3E705|EFG1P_YEAST rRNA-processing protein EFG1 OS=Saccharomyces cerevisiae (strain ATCC 204508 / S288c) GN=EFG1 PE=1 SV=2	1	3	15	27.121	233	0	6.8953	105260000	0	0	0	0	0	0	0	0	0	0	690810	470810	559960	1121500	0	0	0	0	0	0	1355800	0	944810	0	0	0	2217600	956790	0	2235200	70046000	8689900	0	0	6344900	4780300	4841700	0
P06242	Serine/threonine-protein kinase KIN28	KIN28	sp|P06242|KIN28_YEAST Serine/threonine-protein kinase KIN28 OS=Saccharomyces cerevisiae (strain ATCC 204508 / S288c) GN=KIN28 PE=1 SV=1	1	5	17	35.247	306	0	10.577	236480000	0	0	0	0	0	0	0	3500100	0	0	0	0	0	0	0	3016500	2367900	1290300	0	0	0	0	0	0	1436100	0	1027600	31351000	44785000	132170000	0	0	0	0	6339900	0	5442300	0
Q12024	Ribosome biogenesis protein YTM1	YTM1	sp|Q12024|YTM1_YEAST Ribosome biogenesis protein YTM1 OS=Saccharomyces cerevisiae (strain ATCC 204508 / S288c) GN=YTM1 PE=1 SV=1	1	15	45.2	51.358	460	0	323.31	1290500000	0	0	0	6745600	0	116110000	0	0	0	0	0	0	0	0	0	0	0	0	0	0	0	0	2765900	27305000	932340000	0	0	0	15660000	114940000	12074000	9059200	3885300	6893300	6229300	16144000	9083100	1705000
P47122	GPN-loop GTPase 1	NPA3	sp|P47122|GPN1_YEAST GPN-loop GTPase 1 OS=Saccharomyces cerevisiae (strain ATCC 204508 / S288c) GN=NPA3 PE=1 SV=1	1	2	5.7	43.194	385	0	2.9516	60625000	0	0	0	0	0	13270000	0	0	0	0	0	0	0	0	0	0	0	0	0	0	0	0	2599500	0	0	3694000	6366900	0	0	6076400	7247000	4091300	2930400	1526700	6121400	0	0	0
P0CX28;P0CX27	60S ribosomal protein L42-B;60S ribosomal protein L42-A	RPL42B;RPL42A	sp|P0CX28|RL44B_YEAST 60S ribosomal protein L42-B OS=Saccharomyces cerevisiae (strain ATCC 204508 / S288c) GN=RPL42B PE=1 SV=1;sp|P0CX27|RL44A_YEAST 60S ribosomal protein L42-A OS=Saccharomyces cerevisiae (strain ATCC 204508 / S288c) GN=RPL42A PE=1 SV=1	2	2	15.1	12.211	106	0	12.181	336790000	0	0	0	0	0	0	0	0	0	0	0	0	0	0	0	0	0	0	0	0	0	0	0	0	0	0	5049600	9111700	4389100	4495300	3719600	14512000	0	4030300	6087600	6943200	223540000	0
P53172	Protein SDS23	SDS23	sp|P53172|SDS23_YEAST Protein SDS23 OS=Saccharomyces cerevisiae (strain ATCC 204508 / S288c) GN=SDS23 PE=1 SV=2	1	7	17.6	58.097	527	0	99.67	289220000	0	0	0	0	0	0	0	0	0	0	0	0	0	0	0	0	0	0	0	1625000	2233700	84737000	53868000	0	83151000	24452000	20832000	0	1757000	6123500	0	1886800	0	0	5993000	0	0	0
P38011	Guanine nucleotide-binding protein subunit beta-like protein	ASC1	sp|P38011|GBLP_YEAST Guanine nucleotide-binding protein subunit beta-like protein OS=Saccharomyces cerevisiae (strain ATCC 204508 / S288c) GN=ASC1 PE=1 SV=4	1	10	30.1	34.805	319	0	164.68	3532000000	0	5697200	0	956870	0	0	1571500	0	144540000	0	0	0	0	0	0	3184700	0	3462000	3900500	460310	63144000	0	0	3779100	17623000	0	0	6154900	554570000	2511800000	10668000	8650000	11895000	1774000	5846900	0	96509000	52881000
P13393	TATA-box-binding protein	SPT15	sp|P13393|TBP_YEAST TATA-box-binding protein OS=Saccharomyces cerevisiae (strain ATCC 204508 / S288c) GN=SPT15 PE=1 SV=3	1	4	13.8	27.003	240	0	8.2308	169690000	0	1150800	0	2018600	0	0	0	1557000	3623900	0	14802000	0	1845800	0	0	432870	0	0	0	0	0	0	0	16820000	1571300	0	0	0	0	0	0	0	112000000	4177400	5763800	0	3926300	0
P30665	DNA replication licensing factor MCM4	MCM4	sp|P30665|MCM4_YEAST DNA replication licensing factor MCM4 OS=Saccharomyces cerevisiae (strain ATCC 204508 / S288c) GN=MCM4 PE=1 SV=2	1	11	14	105	933	0	33.043	134690000	1642300	0	0	847360	0	0	0	0	0	0	0	0	0	0	729160	67749000	25414000	615670	1000200	9054600	2100500	3547600	1454000	8892400	0	2680700	3243300	0	0	0	0	0	0	0	5717900	0	0	0
Q12298	Uncharacterized ABC transporter ATP-binding protein YDR061W		sp|Q12298|YD061_YEAST Uncharacterized ABC transporter ATP-binding protein YDR061W OS=Saccharomyces cerevisiae (strain ATCC 204508 / S288c) GN=YDR061W PE=1 SV=1	1	15	30.4	61.191	539	0	253.98	753790000	0	0	709920	4804800	3810000	2378300	0	0	0	0	0	0	0	0	20330000	6111400	0	1567800	2819000	427480	5093400	10553000	6215800	626400000	7982700	0	7936300	1439300	0	2943700	0	0	2309800	3301700	5686100	819140	29039000	0
P53293	Uncharacterized protein YGR168C	YGR168C	sp|P53293|YG3W_YEAST Uncharacterized protein YGR168C OS=Saccharomyces cerevisiae (strain ATCC 204508 / S288c) GN=YGR168C PE=4 SV=1	1	2	2.1	44.3	376	0	9.6329	590370000	0	0	0	0	0	0	0	0	0	0	0	0	0	0	1684000	0	0	0	0	0	0	458430000	24920000	20111000	7360500	5371500	17942000	0	9534300	7764300	5240200	5900800	3537500	2943500	5564400	3660500	10402000	0
P48362	Protein HGH1	HGH1	sp|P48362|HGH1_YEAST Protein HGH1 OS=Saccharomyces cerevisiae (strain ATCC 204508 / S288c) GN=HGH1 PE=1 SV=2	1	2	5.3	44.951	394	0	4.4298	33813000	0	0	0	0	0	0	0	0	0	0	0	0	0	0	0	0	0	0	0	0	0	0	0	0	0	0	0	0	0	0	1550900	0	7764400	3572500	5513400	0	12500000	0
P53883	Nucleolar protein 13	NOP13	sp|P53883|NOP13_YEAST Nucleolar protein 13 OS=Saccharomyces cerevisiae (strain ATCC 204508 / S288c) GN=NOP13 PE=1 SV=2	1	10	26.3	45.609	403	0	109.85	307740000	0	0	0	0	0	0	1385000	0	0	0	0	0	0	0	0	0	0	0	0	0	0	0	6201900	0	273470000	2269500	0	4781900	0	1584300	0	872250	0	0	5498400	0	11672000	0
P25451	Proteasome subunit beta type-3	PUP3	sp|P25451|PSB3_YEAST Proteasome subunit beta type-3 OS=Saccharomyces cerevisiae (strain ATCC 204508 / S288c) GN=PUP3 PE=1 SV=1	1	5	30.2	22.605	205	0	167.34	581390000	0	0	0	0	0	0	0	0	0	0	0	0	23032000	0	0	0	0	0	0	0	0	0	0	0	0	0	0	0	0	0	0	0	0	0	5422300	531510000	1036800	0
P38886	26S proteasome regulatory subunit RPN10	RPN10	sp|P38886|RPN10_YEAST 26S proteasome regulatory subunit RPN10 OS=Saccharomyces cerevisiae (strain ATCC 204508 / S288c) GN=RPN10 PE=1 SV=3	1	1	4.9	29.747	268	0.0038685	2.0549	5370400	0	0	0	0	0	0	0	0	0	0	0	0	0	0	0	0	0	0	0	0	0	0	0	0	0	0	0	0	0	0	0	0	0	0	5370400	0	0	0
P40165	NAD(P)H-hydrate epimerase		sp|P40165|NNRE_YEAST NAD(P)H-hydrate epimerase OS=Saccharomyces cerevisiae (strain ATCC 204508 / S288c) GN=YNL200C PE=1 SV=1	1	6	30.9	27.521	246	0	156.18	528210000	0	0	0	0	0	0	0	0	0	0	3908600	0	0	0	0	0	0	0	0	0	0	0	0	0	4297100	2609100	3429700	800350	2880900	2050500	11278000	126700000	276630000	77932000	5333800	5264800	2265200	1705000
P37262;P50278	6-phosphogluconolactonase-like protein 2;6-phosphogluconolactonase-like protein 1	SOL2;SOL1	sp|P37262|SOL2_YEAST 6-phosphogluconolactonase-like protein 2 OS=Saccharomyces cerevisiae (strain ATCC 204508 / S288c) GN=SOL2 PE=1 SV=2;sp|P50278|SOL1_YEAST 6-phosphogluconolactonase-like protein 1 OS=Saccharomyces cerevisiae (strain ATCC 204508 / S288c)	2	2	6	34.501	315	0	3.4605	48926000	0	0	0	0	2412000	10917000	0	0	0	0	0	0	0	0	0	0	0	0	0	0	0	0	0	0	0	0	1493700	15439000	2251600	0	6123600	0	0	0	5196800	3475600	0	0
P42937	CDC25-like phosphatase YCH1	YCH1	sp|P42937|YCH1_YEAST CDC25-like phosphatase YCH1 OS=Saccharomyces cerevisiae (strain ATCC 204508 / S288c) GN=YCH1 PE=1 SV=1	1	4	25.7	17.248	148	0	15.75	257520000	0	0	0	0	0	99782000	19742000	0	0	0	0	0	0	0	0	0	0	0	0	5502900	0	0	0	0	0	0	0	0	5743000	62922000	0	4891000	0	0	5194000	11943000	0	41799000
Q04067	Eukaryotic translation initiation factor 3 subunit G	TIF35	sp|Q04067|EIF3G_YEAST Eukaryotic translation initiation factor 3 subunit G OS=Saccharomyces cerevisiae (strain ATCC 204508 / S288c) GN=TIF35 PE=1 SV=1	1	8	36.9	30.501	274	0	176.87	1025100000	0	651550	0	0	0	0	0	0	0	0	0	0	0	0	0	0	0	0	0	0	0	0	0	0	0	0	537550	0	7602900	792020000	13318000	9134500	7595300	0	5036300	0	82801000	96919000
P38701	40S ribosomal protein S20	RPS20	sp|P38701|RS20_YEAST 40S ribosomal protein S20 OS=Saccharomyces cerevisiae (strain ATCC 204508 / S288c) GN=RPS20 PE=1 SV=3	1	8	52.1	13.907	121	0	323.31	6790000000	270100000	11876000	7034200	0	0	0	0	0	2482100	0	0	0	2267200	1302000	0	0	0	0	0	0	0	0	1047700	0	0	0	0	0	0	0	2772400	1865600	1428700	1426500	4849500	2427000	5817900000	443980000
P15731	Ubiquitin-conjugating enzyme E2 4	UBC4	sp|P15731|UBC4_YEAST Ubiquitin-conjugating enzyme E2 4 OS=Saccharomyces cerevisiae (strain ATCC 204508 / S288c) GN=UBC4 PE=1 SV=1	1	2	12.2	16.456	148	0	5.7581	584940000	0	31854000	2289400	0	0	0	9818800	0	0	0	0	0	0	3614000	0	593490	0	2873200	0	0	0	0	0	0	0	0	0	0	0	0	0	0	0	0	4831000	3184700	317090000	153180000
Q08960	S-adenosyl-L-methionine-dependent tRNA 4-demethylwyosine synthase	TYW1	sp|Q08960|TYW1_YEAST S-adenosyl-L-methionine-dependent tRNA 4-demethylwyosine synthase OS=Saccharomyces cerevisiae (strain ATCC 204508 / S288c) GN=TYW1 PE=1 SV=1	1	6	6.9	89.804	810	0	8.1584	82563000	0	0	0	0	0	11004000	0	0	1222200	0	0	0	0	846780	0	4017100	26318000	8959700	12802000	843730	6155900	0	0	3106900	0	0	0	0	0	0	0	0	2477400	0	4809400	0	0	0
P40495	Homoisocitrate dehydrogenase, mitochondrial	LYS12	sp|P40495|LYS12_YEAST Homoisocitrate dehydrogenase, mitochondrial OS=Saccharomyces cerevisiae (strain ATCC 204508 / S288c) GN=LYS12 PE=1 SV=1	1	17	43.4	40.068	371	0	225.82	2492100000	0	0	1349000	0	175710	0	0	689820000	9872000	0	2189400	0	0	0	0	574910	0	0	0	0	764870	0	0	0	8269400	965090000	477120000	3123400	18842000	82255000	3337500	51020000	87264000	44786000	4700900	10958000	14814000	15750000
P40471	NADPH-dependent 1-acyldihydroxyacetone phosphate reductase	AYR1	sp|P40471|AYR1_YEAST NADPH-dependent 1-acyldihydroxyacetone phosphate reductase OS=Saccharomyces cerevisiae (strain ATCC 204508 / S288c) GN=AYR1 PE=1 SV=1	1	3	12.5	32.814	297	0	27.633	90085000	0	0	0	0	0	0	0	0	0	0	0	0	0	19244000	0	0	0	0	0	0	0	0	0	0	0	0	0	0	0	55750000	0	0	0	0	4697900	0	0	0
P38088	Glycine--tRNA ligase 1, mitochondrial	GRS1	sp|P38088|SYG_YEAST Glycine--tRNA ligase 1, mitochondrial OS=Saccharomyces cerevisiae (strain ATCC 204508 / S288c) GN=GRS1 PE=1 SV=3	1	15	27	78.183	690	0	118.21	362060000	0	0	0	0	28173000	9006200	1812700	0	0	0	0	927320	4153000	0	455720	1261700	0	471560	5159600	156920000	13311000	1311400	17889000	4926800	31574000	0	25597000	5291600	2065500	11443000	6016700	3057400	1048300	0	4669200	23450000	0	0
P32599	Fimbrin	SAC6	sp|P32599|FIMB_YEAST Fimbrin OS=Saccharomyces cerevisiae (strain ATCC 204508 / S288c) GN=SAC6 PE=1 SV=1	1	19	34.7	71.772	642	0	323.31	932400000	0	0	0	0	51596000	1559600	0	1081000	0	0	0	0	312320	0	0	0	5511200	0	0	2691100	640090000	10695000	34817000	32293000	17853000	4397200	27443000	9461700	29259000	6794600	0	0	4120900	1424400	4657000	12332000	8694300	12554000
P35178	Ribosomal RNA-processing protein 1	RRP1	sp|P35178|RRP1_YEAST Ribosomal RNA-processing protein 1 OS=Saccharomyces cerevisiae (strain ATCC 204508 / S288c) GN=RRP1 PE=1 SV=2	1	17	41.4	33.202	278	0	323.31	3893100000	0	1709600	0	0	0	0	0	0	44883000	0	0	1192000	0	0	0	290280	1170000	0	920510	0	0	0	798220	0	8189300	25634000	4757600	21923000	3390700000	341480000	2402500	4514500	24537000	0	4653500	0	11995000	1349100
P53256	Exosome complex component RRP46	RRP46	sp|P53256|RRP46_YEAST Exosome complex component RRP46 OS=Saccharomyces cerevisiae (strain ATCC 204508 / S288c) GN=RRP46 PE=1 SV=2	1	3	14.8	24.407	223	0	46.249	223650000	0	0	0	0	0	2179800	0	0	0	0	0	0	0	0	0	0	0	0	5595700	3067800	0	0	4285900	12298000	0	0	0	0	0	0	3071900	2338300	45375000	140840000	4596200	0	0	0
Q08230	Succinate dehydrogenase assembly factor 2, mitochondrial	SDH5	sp|Q08230|SDHF2_YEAST Succinate dehydrogenase assembly factor 2, mitochondrial OS=Saccharomyces cerevisiae (strain ATCC 204508 / S288c) GN=SDH5 PE=1 SV=1	1	3	19.8	19.042	162	0	53.245	145070000	0	0	0	0	0	15868000	4538900	0	0	0	0	0	0	0	0	0	0	0	0	0	0	0	0	0	0	0	0	0	0	15066000	0	0	0	0	4538200	0	0	103590000
P37263	UPF0743 protein YCR087C-A		sp|P37263|YC16_YEAST UPF0743 protein YCR087C-A OS=Saccharomyces cerevisiae (strain ATCC 204508 / S288c) GN=YCR087C-A PE=1 SV=1	1	2	13.1	17.738	153	0	5.0044	185720000	0	0	0	0	0	0	0	0	0	0	0	0	24721000	0	0	0	0	0	0	0	0	0	0	0	0	0	0	22535000	0	0	0	0	8279500	0	4533900	125650000	0	0
P53598	Succinyl-CoA ligase [ADP-forming] subunit alpha, mitochondrial	LSC1	sp|P53598|SUCA_YEAST Succinyl-CoA ligase [ADP-forming] subunit alpha, mitochondrial OS=Saccharomyces cerevisiae (strain ATCC 204508 / S288c) GN=LSC1 PE=1 SV=1	1	11	41.9	35.032	329	0	244.52	744930000	0	0	0	0	590230	0	0	0	12719000	0	0	0	0	0	0	2486900	0	1862600	1001800	0	0	0	0	4663500	0	0	0	0	78134000	626730000	0	5798100	2882700	0	4522200	0	3540900	0
Q12481	rRNA biogenesis protein RRP36	RRP36	sp|Q12481|RRP36_YEAST rRNA biogenesis protein RRP36 OS=Saccharomyces cerevisiae (strain ATCC 204508 / S288c) GN=RRP36 PE=1 SV=1	1	7	19.3	36.125	300	0	54.623	509350000	0	0	0	3477100	0	0	1392100	17852000	0	0	0	0	0	0	0	0	0	2919400	0	0	0	654330	3715900	0	0	173480000	44720000	13284000	159060000	74800000	4961800	2481600	0	0	4481100	0	606010	105880
Q03148;P53824;P43545	Pyridoxal 5-phosphate synthase subunit SNZ1	SNZ1	sp|Q03148|SNZ1_YEAST Pyridoxal 5-phosphate synthase subunit SNZ1 OS=Saccharomyces cerevisiae (strain ATCC 204508 / S288c) GN=SNZ1 PE=1 SV=1	3	8	30.3	31.817	297	0	282.45	357880000	0	785780	0	5265700	0	0	0	0	0	0	0	0	0	0	0	0	0	0	0	0	0	6111000	614080	0	0	0	0	0	14536000	322180000	1707500	2206600	0	0	4476600	0	0	0
P0C2H8	60S ribosomal protein L31-A	RPL31A	sp|P0C2H8|RL31A_YEAST 60S ribosomal protein L31-A OS=Saccharomyces cerevisiae (strain ATCC 204508 / S288c) GN=RPL31A PE=1 SV=1	1	7	61.1	12.953	113	0	157.43	1418500000	0	0	19379000	0	0	0	0	0	0	0	0	0	0	57978000	0	0	4705000	1228700	0	0	0	0	0	0	0	0	0	869090	0	0	0	0	0	1509500	4402600	13002000	120520000	120230000
P39990	13 kDa ribonucleoprotein-associated protein	SNU13	sp|P39990|SNU13_YEAST 13 kDa ribonucleoprotein-associated protein OS=Saccharomyces cerevisiae (strain ATCC 204508 / S288c) GN=SNU13 PE=1 SV=1	1	4	32.5	13.569	126	0	140.76	8138500000	0	17828000	1680500000	3449300	0	0	0	0	0	0	0	0	0	988100000	0	0	0	0	0	0	0	0	0	0	15819000	0	2578700	0	0	4471700	0	4655400	0	0	4371700	2326800	14399000	20515000
P38712	ATP-dependent rRNA helicase RRP3	RRP3	sp|P38712|RRP3_YEAST ATP-dependent rRNA helicase RRP3 OS=Saccharomyces cerevisiae (strain ATCC 204508 / S288c) GN=RRP3 PE=1 SV=2	1	17	33.9	55.968	501	0	130.2	1377700000	0	0	0	493220	3017000	934350	1941100	0	890620	0	0	1549900	0	0	1655200	2676300	855390	0	1093200	909200	1776400	1673300	9333400	793240000	140870000	109050000	109270000	32235000	72987000	28241000	14194000	2939200	872110	4165200	4368700	1922100	24380000	0
Q06543	GPN-loop GTPase 3	GPN3	sp|Q06543|GPN3_YEAST GPN-loop GTPase 3 OS=Saccharomyces cerevisiae (strain ATCC 204508 / S288c) GN=GPN3 PE=1 SV=1	1	4	21	30.653	272	0	37.239	166750000	0	0	0	0	0	0	0	0	0	0	0	0	0	0	0	0	0	0	0	0	0	0	0	0	0	0	0	0	0	2653400	138270000	15709000	0	0	4356300	1635000	1722900	0
Q07938	S-methyl-5-thioadenosine phosphorylase	MEU1	sp|Q07938|MTAP_YEAST S-methyl-5-thioadenosine phosphorylase OS=Saccharomyces cerevisiae (strain ATCC 204508 / S288c) GN=MEU1 PE=1 SV=1	1	6	18.4	37.856	337	0	32.536	401330000	0	0	0	0	0	0	0	852180	36104000	0	0	0	0	0	0	0	0	0	0	0	0	0	0	0	0	0	13631000	51167000	203380000	17656000	30647000	3872400	10677000	28993000	4353700	0	0	0
Q08444	20S-pre-rRNA D-site endonuclease NOB1	NOB1	sp|Q08444|NOB1_YEAST 20S-pre-rRNA D-site endonuclease NOB1 OS=Saccharomyces cerevisiae (strain ATCC 204508 / S288c) GN=NOB1 PE=1 SV=1	1	7	19.4	51.741	459	0	37.584	164830000	0	0	0	0	0	131260	0	0	0	0	0	0	0	0	0	0	0	0	0	0	110350	0	1767600	133150000	4380500	445670	3333400	540120	1031700	5005600	2239600	757400	1347200	1670700	4341000	1677900	0	0
P07284	Serine--tRNA ligase, cytoplasmic	SES1	sp|P07284|SYSC_YEAST Serine--tRNA ligase, cytoplasmic OS=Saccharomyces cerevisiae (strain ATCC 204508 / S288c) GN=SES1 PE=1 SV=2	1	3	9.3	53.309	462	0	28.246	51582000	0	0	0	0	0	0	0	0	0	0	0	0	0	0	0	0	0	0	0	906140	0	0	0	0	23323000	0	6417200	2411700	0	0	3625100	1463800	0	4166400	4325700	0	2000000	0
P23369	54S ribosomal protein L25, mitochondrial	MRPL25	sp|P23369|RM25_YEAST 54S ribosomal protein L25, mitochondrial OS=Saccharomyces cerevisiae (strain ATCC 204508 / S288c) GN=MRPL25 PE=1 SV=2	1	1	7	18.587	157	0.0020121	2.4457	49097000	0	0	0	0	3011500	0	0	0	0	0	0	0	469760	0	0	0	0	0	0	1196400	0	4303000	0	0	3514100	0	6873800	0	0	0	0	6015600	4008300	2968100	4323300	9448800	0	0
P28495	F-actin-capping protein subunit alpha	CAP1	sp|P28495|CAPZA_YEAST F-actin-capping protein subunit alpha OS=Saccharomyces cerevisiae (strain ATCC 204508 / S288c) GN=CAP1 PE=1 SV=1	1	2	6.3	30.699	268	0.0032531	2.1853	15397000	0	0	0	0	0	0	0	0	0	0	0	0	0	0	0	0	0	0	0	0	0	0	0	0	0	0	0	0	0	7280100	2417600	1386400	0	0	4313000	0	0	0
P34730;P29311	Protein BMH2;Protein BMH1	BMH2;BMH1	sp|P34730|BMH2_YEAST Protein BMH2 OS=Saccharomyces cerevisiae (strain ATCC 204508 / S288c) GN=BMH2 PE=1 SV=3;sp|P29311|BMH1_YEAST Protein BMH1 OS=Saccharomyces cerevisiae (strain ATCC 204508 / S288c) GN=BMH1 PE=1 SV=4	2	11	46.5	31.061	273	0	153.27	987720000	0	0	1268500	1140600	2723200	37961000	2259700	1273700	76103000	0	0	0	0	0	0	0	4263500	2357900	732250	2870200	6617600	7976400	32615000	8351400	0	0	5705500	8371500	325650000	394930000	9585800	9691300	15531000	559330	4258600	3819100	18550000	0
P05743	60S ribosomal protein L26-A	RPL26A	sp|P05743|RL26A_YEAST 60S ribosomal protein L26-A OS=Saccharomyces cerevisiae (strain ATCC 204508 / S288c) GN=RPL26A PE=1 SV=3	1	10	53.5	14.234	127	0	22.121	233000000	0	0	0	2576600	0	0	0	0	0	0	0	0	0	0	0	0	0	0	0	0	0	0	0	0	0	0	0	0	0	0	0	0	0	0	4209900	0	212480000	7226500
Q08826	Sorting nexin-3	SNX3	sp|Q08826|SNX3_YEAST Sorting nexin-3 OS=Saccharomyces cerevisiae (strain ATCC 204508 / S288c) GN=SNX3 PE=1 SV=1	1	4	21	18.769	162	0	11.694	130550000	0	0	0	0	0	0	0	0	0	0	25797000	0	2292000	0	0	0	0	0	0	0	0	0	0	0	0	0	0	0	0	0	0	0	0	0	4146300	36194000	57959000	2516700
P33298	26S protease regulatory subunit 6B homolog	RPT3	sp|P33298|PRS6B_YEAST 26S protease regulatory subunit 6B homolog OS=Saccharomyces cerevisiae (strain ATCC 204508 / S288c) GN=RPT3 PE=1 SV=2	1	4	11.7	47.893	428	0	4.488	50160000	0	0	0	0	0	0	0	0	0	0	0	0	0	0	0	0	0	0	0	0	0	0	0	0	0	0	6550200	3933000	2286400	5362100	736470	6181500	8688600	2230100	4120000	1072900	6397900	0
P38336	RNases MRP/P 32.9 kDa subunit	POP4	sp|P38336|POP4_YEAST RNases MRP/P 32.9 kDa subunit OS=Saccharomyces cerevisiae (strain ATCC 204508 / S288c) GN=POP4 PE=1 SV=1	1	6	21.9	32.881	279	0	30.632	71455000	0	0	0	0	0	0	0	0	0	0	0	0	0	0	0	0	0	0	0	0	0	0	0	0	0	0	0	9458700	0	0	55332000	2550300	0	0	4114100	0	0	0
P33328	Synaptobrevin homolog 2	SNC2	sp|P33328|SNC2_YEAST Synaptobrevin homolog 2 OS=Saccharomyces cerevisiae (strain ATCC 204508 / S288c) GN=SNC2 PE=1 SV=2	1	3	26.1	12.957	115	0	28.049	211460000	0	26845000	0	0	0	0	0	0	0	0	2951700	0	0	0	0	0	0	0	0	0	0	0	2199500	0	0	0	45958000	0	0	0	0	0	0	0	4108200	0	34185000	72246000
P25586	KRR1 small subunit processome component	KRR1	sp|P25586|KRR1_YEAST KRR1 small subunit processome component OS=Saccharomyces cerevisiae (strain ATCC 204508 / S288c) GN=KRR1 PE=1 SV=1	1	14	43.7	37.159	316	0	206.05	1870300000	0	0	316890	0	706120	4406200	0	104060000	0	0	0	1810100	6027800	0	8752900	0	7638000	0	0	5457900	2554000	0	2089300	0	0	1186900000	374590000	76233000	11195000	11751000	5207700	5495300	27147000	2215800	4010500	20847000	0	920760
P15303	Protein transport protein SEC23	SEC23	sp|P15303|SEC23_YEAST Protein transport protein SEC23 OS=Saccharomyces cerevisiae (strain ATCC 204508 / S288c) GN=SEC23 PE=1 SV=1	1	18	23	85.384	768	0	323.31	1400800000	0	0	2915800	0	5615700	719460	21929000	1053000	0	0	0	0	0	3039200	0	4596300	6511200	33982000	1042800000	147380000	32978000	4265500	25155000	3751500	12842000	0	2810800	5134000	4796700	1560700	4826200	0	0	2315000	3997200	5590700	3988000	0
P07281;P07280	40S ribosomal protein S19-B;40S ribosomal protein S19-A	RPS19B;RPS19A	sp|P07281|RS19B_YEAST 40S ribosomal protein S19-B OS=Saccharomyces cerevisiae (strain ATCC 204508 / S288c) GN=RPS19B PE=1 SV=2;sp|P07280|RS19A_YEAST 40S ribosomal protein S19-A OS=Saccharomyces cerevisiae (strain ATCC 204508 / S288c) GN=RPS19A PE=1 SV=2	2	8	45.8	15.891	144	0	134.1	2929900000	0	4150400	0	6182500	1074800	0	0	1791700	0	0	1663600	0	1769800	1401500	1568200	1408700	0	790720	0	0	0	1893600	2804000	2191800	0	0	0	2709800	4435900	3042700	0	2714300	0	1796000	3966500	0	1906800000	649870000
Q08965	Ribosome biogenesis protein BMS1	BMS1	sp|Q08965|BMS1_YEAST Ribosome biogenesis protein BMS1 OS=Saccharomyces cerevisiae (strain ATCC 204508 / S288c) GN=BMS1 PE=1 SV=1	1	15	15.8	135.57	1183	0	119.57	446200000	0	4651900	777080	0	0	0	96461	2272800	511000	0	0	0	0	0	11597000	187090000	24828000	19005000	20643000	8892400	2956000	2674200	1082700	4363200	37609000	2769900	61598000	11751000	13234000	10292000	3560500	0	0	0	3850600	0	0	9784100
Q04660	Ribosome biogenesis protein ERB1	ERB1	sp|Q04660|ERB1_YEAST Ribosome biogenesis protein ERB1 OS=Saccharomyces cerevisiae (strain ATCC 204508 / S288c) GN=ERB1 PE=1 SV=1	1	25	34.8	91.704	807	0	323.31	1950400000	0	0	0	10936000	3307300	0	0	0	0	0	0	0	0	0	130100000	529490000	98800000	103750000	716680000	67184000	99588000	24879000	12274000	0	29741000	5693300	11495000	11540000	0	5262200	25345000	19100000	3502300	1398100	3848300	2541900	28894000	4454800
Q07362	Protein PBP4	PBP4	sp|Q07362|PBP4_YEAST Protein PBP4 OS=Saccharomyces cerevisiae (strain ATCC 204508 / S288c) GN=PBP4 PE=1 SV=1	1	3	20	19.881	185	0	6.7809	57807000	0	0	0	1341900	0	0	0	0	0	0	0	0	0	0	14986000	1223000	0	628840	0	0	0	0	2189100	0	4475100	6570300	952430	0	0	0	0	0	0	21600000	3840500	0	0	0
P00724	Invertase 2	SUC2	sp|P00724|INV2_YEAST Invertase 2 OS=Saccharomyces cerevisiae (strain ATCC 204508 / S288c) GN=SUC2 PE=1 SV=1	1	6	9.6	60.639	532	0	13.817	685970000	2071500	0	0	0	0	0	0	0	0	0	0	0	0	0	17850000	27062000	32632000	24570000	27650000	35992000	66084000	82819000	90410000	30389000	46416000	15527000	30707000	7303900	7717300	14777000	15388000	8213800	6476300	11115000	3765000	3336600	41461000	20729000
P39077	T-complex protein 1 subunit gamma	CCT3	sp|P39077|TCPG_YEAST T-complex protein 1 subunit gamma OS=Saccharomyces cerevisiae (strain ATCC 204508 / S288c) GN=CCT3 PE=1 SV=2	1	7	14	58.814	534	0	18.067	246680000	11099000	0	0	0	0	0	0	0	0	0	0	0	0	1537100	0	0	0	0	0	932320	0	0	44905000	137160000	10446000	0	0	0	0	1356500	9917600	0	4004400	4667800	3748800	3882200	9020500	1979800
P25039	Elongation factor G, mitochondrial	MEF1	sp|P25039|EFGM_YEAST Elongation factor G, mitochondrial OS=Saccharomyces cerevisiae (strain ATCC 204508 / S288c) GN=MEF1 PE=1 SV=2	1	7	11.2	84.573	761	0	28.93	211430000	0	0	0	0	0	0	0	0	0	0	0	0	0	0	677290	0	827390	3912300	159560000	16541000	1690300	883190	7980400	0	7433500	0	1518800	0	0	4809700	0	1888400	0	0	3713300	0	0	0
Q06168	Chromatin structure-remodeling complex subunit SFH1	SFH1	sp|Q06168|SFH1_YEAST Chromatin structure-remodeling complex subunit SFH1 OS=Saccharomyces cerevisiae (strain ATCC 204508 / S288c) GN=SFH1 PE=1 SV=1	1	1	3.1	48.777	426	0	7.4715	58286000	0	0	0	0	0	0	0	0	0	0	0	0	0	0	0	0	0	0	0	0	0	0	0	0	9348500	3109900	2252200	1183200	10202000	0	7325000	2355300	3597600	13706000	3704600	0	1501100	0
P38879	Nascent polypeptide-associated complex subunit alpha	EGD2	sp|P38879|NACA_YEAST Nascent polypeptide-associated complex subunit alpha OS=Saccharomyces cerevisiae (strain ATCC 204508 / S288c) GN=EGD2 PE=1 SV=3	1	1	7.5	18.709	174	0	4.7337	21568000	0	0	0	0	0	0	0	0	0	0	0	3399800	0	0	0	0	0	0	0	0	0	0	0	0	0	0	0	0	0	0	0	0	0	11246000	3673100	0	3249300	0
Q06624	DNA damage tolerance protein RHC31	AOS1	sp|Q06624|RHC31_YEAST DNA damage tolerance protein RHC31 OS=Saccharomyces cerevisiae (strain ATCC 204508 / S288c) GN=AOS1 PE=1 SV=1	1	5	14.1	39.273	347	0	77.134	180020000	0	0	0	0	0	0	0	0	0	0	0	0	1591900	0	0	0	0	0	15606000	0	0	1384800	0	0	0	12566000	129560000	12543000	0	0	0	0	0	0	3650700	0	0	0
Q02354	U3 small nucleolar RNA-associated protein 6	UTP6	sp|Q02354|UTP6_YEAST U3 small nucleolar RNA-associated protein 6 OS=Saccharomyces cerevisiae (strain ATCC 204508 / S288c) GN=UTP6 PE=1 SV=2	1	4	8.2	52.418	440	0	5.9071	56784000	0	0	0	0	0	660430	0	0	0	0	0	0	0	0	946130	0	2325100	0	0	0	3252400	0	0	7904200	3190900	0	0	0	0	0	0	0	0	0	3618200	29170000	5716800	0
Q04304	UPF0659 protein YMR090W		sp|Q04304|YMY0_YEAST UPF0659 protein YMR090W OS=Saccharomyces cerevisiae (strain ATCC 204508 / S288c) GN=YMR090W PE=1 SV=1	1	4	16.7	24.882	227	0	5.858	33282000	0	0	0	1611600	0	0	0	0	0	0	0	0	0	1514900	0	0	0	0	0	0	0	0	0	0	0	0	0	0	0	0	0	0	0	26560000	3594900	0	0	0
P36151	Uncharacterized protein YKR070W	YKR070W	sp|P36151|YK50_YEAST Uncharacterized protein YKR070W OS=Saccharomyces cerevisiae (strain ATCC 204508 / S288c) GN=YKR070W PE=1 SV=1	1	6	19	39.406	352	0	48.51	252070000	0	0	0	0	0	0	0	0	0	0	0	0	0	0	0	0	0	0	0	0	0	0	0	0	0	0	189320000	57162000	0	2014100	0	0	0	0	3578900	0	0	0
P40079	U3 small nucleolar ribonucleoprotein protein LCP5	LCP5	sp|P40079|LCP5_YEAST U3 small nucleolar ribonucleoprotein protein LCP5 OS=Saccharomyces cerevisiae (strain ATCC 204508 / S288c) GN=LCP5 PE=1 SV=1	1	4	9.8	40.794	357	0	8.9984	68753000	0	0	0	0	0	0	49255000	0	0	0	0	0	0	0	0	0	0	0	0	580160	0	0	0	0	0	0	0	0	0	0	140360	10966000	2277200	0	3538200	0	1996800	0
P69771	Vacuolar protein-sorting-associated protein 46	DID2	sp|P69771|DID2_YEAST Vacuolar protein-sorting-associated protein 46 OS=Saccharomyces cerevisiae (strain ATCC 204508 / S288c) GN=DID2 PE=1 SV=1	1	6	28.9	23.091	204	0	16.161	335000000	0	0	0	0	0	0	0	0	0	0	0	0	0	1184900	0	0	0	0	0	0	0	0	1024800	6770800	0	0	0	1104800	0	0	0	86776000	112030000	27601000	3513000	16822000	57578000	17032000
P16622	Ferrochelatase, mitochondrial	HEM15	sp|P16622|HEMH_YEAST Ferrochelatase, mitochondrial OS=Saccharomyces cerevisiae (strain ATCC 204508 / S288c) GN=HEM15 PE=1 SV=1	1	3	7.9	44.596	393	0	9.7411	46139000	0	0	0	0	0	4273600	0	13923000	0	0	0	0	0	0	0	7320600	0	0	0	0	0	0	0	0	5347800	11767000	0	0	0	0	0	0	0	0	3507200	0	0	0
P15454	Guanylate kinase	GUK1	sp|P15454|KGUA_YEAST Guanylate kinase OS=Saccharomyces cerevisiae (strain ATCC 204508 / S288c) GN=GUK1 PE=1 SV=2	1	8	41.7	20.637	187	0	114.47	355240000	0	0	0	0	0	0	0	0	0	0	0	0	1907000	0	0	1989000	0	0	0	3556900	0	0	0	0	0	0	0	0	0	0	0	0	0	0	3363300	318430000	14616000	6692600
Q12333	Ferric/cupric reductase transmembrane component 7	FRE7	sp|Q12333|FRE7_YEAST Ferric/cupric reductase transmembrane component 7 OS=Saccharomyces cerevisiae (strain ATCC 204508 / S288c) GN=FRE7 PE=1 SV=2	1	3	6	70.905	620	0	10.214	65414000	0	11195000	1075800	2250600	0	0	0	0	0	0	0	0	2386700	0	1470800	2828300	0	0	0	0	0	1042500	0	6821900	0	0	7908600	15375000	3503600	0	0	0	0	0	3359900	0	0	6195000
P00931	Tryptophan synthase	TRP5	sp|P00931|TRP_YEAST Tryptophan synthase OS=Saccharomyces cerevisiae (strain ATCC 204508 / S288c) GN=TRP5 PE=1 SV=1	1	18	31.1	76.625	707	0	323.31	1025600000	0	0	0	0	7494200	2045200	355770	0	0	0	0	0	0	0	1916900	1139200	1763900	1430700	3293300	13089000	90157000	32220000	468610000	42359000	32046000	13112000	13110000	2364300	9727800	3703000	136170000	38787000	25347000	6128700	3251600	2760900	2299600	1152400
P33330	Phosphoserine aminotransferase	SER1	sp|P33330|SERC_YEAST Phosphoserine aminotransferase OS=Saccharomyces cerevisiae (strain ATCC 204508 / S288c) GN=SER1 PE=1 SV=1	1	3	6.1	43.415	395	0	16.404	70373000	0	0	0	0	0	0	3631900	0	0	0	0	0	0	0	0	0	1981400	0	2830600	0	0	1740600	7081000	3586800	0	19710000	13388000	2757900	3271200	769900	0	4244700	0	0	3168900	0	0	0
P20459	Eukaryotic translation initiation factor 2 subunit alpha	SUI2	sp|P20459|IF2A_YEAST Eukaryotic translation initiation factor 2 subunit alpha OS=Saccharomyces cerevisiae (strain ATCC 204508 / S288c) GN=SUI2 PE=1 SV=1	1	14	42.4	34.717	304	0	249.27	1941300000	5221900	464470000	4056600	2436300	0	0	0	513820	80972000	0	0	0	5042600	0	3329200	3885700	0	0	0	0	4962900	0	6834100	0	0	1397100	4856700	75502000	1139500000	101920000	11274000	2483800	496140	3141200	3104000	0	11286000	3831000
P32381	Actin-related protein 2	ARP2	sp|P32381|ARP2_YEAST Actin-related protein 2 OS=Saccharomyces cerevisiae (strain ATCC 204508 / S288c) GN=ARP2 PE=1 SV=1	1	4	13.3	44.073	391	0	12.133	184700000	0	0	0	0	0	1013200	0	0	0	0	0	0	0	0	0	0	0	0	0	0	0	0	0	0	0	5526200	54159000	62437000	27452000	25677000	0	3175200	0	0	3094000	0	2168900	0
P24279	DNA replication licensing factor MCM3	MCM3	sp|P24279|MCM3_YEAST DNA replication licensing factor MCM3 OS=Saccharomyces cerevisiae (strain ATCC 204508 / S288c) GN=MCM3 PE=1 SV=1	1	6	6	107.52	971	0	24.776	124330000	7502400	0	0	1864500	0	0	5206300	589120	0	0	0	0	0	460640	55737000	0	3194000	2306800	0	0	0	1828300	3433500	0	2805800	3198000	0	5190300	0	1811000	4451100	0	5214500	1981900	3092900	2478300	5464600	1985500
Q07897	Protein CMS1	CMS1	sp|Q07897|CMS1_YEAST Protein CMS1 OS=Saccharomyces cerevisiae (strain ATCC 204508 / S288c) GN=CMS1 PE=1 SV=1	1	6	22	33.394	291	0	60.825	236050000	0	0	0	0	0	0	0	0	18022000	0	0	0	0	0	0	0	0	0	0	0	0	0	0	5291700	0	2653800	0	0	137280000	30759000	28197000	878650	0	607960	3090300	2152300	7116800	0
P25649	ADA histone acetyltransferase complex component 2	AHC2	sp|P25649|AHC2_YEAST ADA histone acetyltransferase complex component 2 OS=Saccharomyces cerevisiae (strain ATCC 204508 / S288c) GN=AHC2 PE=1 SV=1	1	5	41.4	15.117	128	0	99.084	329040000	0	0	0	0	0	0	0	0	0	0	0	0	497290	46029000	0	0	7352400	0	0	15396000	0	0	0	0	0	0	0	0	0	0	0	0	0	0	3086000	0	0	0
P36104	COMPASS component SWD2	SWD2	sp|P36104|SWD2_YEAST COMPASS component SWD2 OS=Saccharomyces cerevisiae (strain ATCC 204508 / S288c) GN=SWD2 PE=1 SV=1	1	3	10	37.122	329	0	9.9798	85587000	0	4318500	0	0	0	0	0	0	19713000	0	0	0	0	0	0	0	0	0	0	0	0	0	0	3842600	0	0	0	12407000	23035000	0	0	1552800	0	0	3081000	0	0	0
P13663	Aspartate-semialdehyde dehydrogenase	HOM2	sp|P13663|DHAS_YEAST Aspartate-semialdehyde dehydrogenase OS=Saccharomyces cerevisiae (strain ATCC 204508 / S288c) GN=HOM2 PE=1 SV=1	1	5	17.5	39.543	365	0	14.021	74697000	0	0	0	0	0	0	0	18268000	0	0	0	0	0	0	0	0	0	0	0	0	0	0	0	0	0	53389000	0	0	0	0	0	0	0	0	3040000	0	0	0
P34252	DNA replication regulator SLD2	SLD2	sp|P34252|SLD2_YEAST DNA replication regulator SLD2 OS=Saccharomyces cerevisiae (strain ATCC 204508 / S288c) GN=SLD2 PE=1 SV=1	1	5	13.2	52.271	453	0	12.849	90953000	0	0	0	0	0	0	15959000	0	0	0	0	0	0	0	0	0	0	0	0	1096500	0	0	64123000	0	0	0	0	1450800	0	0	1288000	0	0	0	3013500	1433200	0	1740800
P47141	37S ribosomal protein S26, mitochondrial	RSM26	sp|P47141|RT26_YEAST 37S ribosomal protein S26, mitochondrial OS=Saccharomyces cerevisiae (strain ATCC 204508 / S288c) GN=RSM26 PE=1 SV=1	1	3	10.9	30.223	266	0	109.46	160710000	0	0	0	0	0	32482000	0	0	0	0	0	0	0	0	0	0	0	0	0	0	982320	0	0	0	0	0	0	0	0	0	8659200	114440000	0	0	2929200	0	0	0
P25627	18S rRNA (guanine(1575)-N(7))-methyltransferase	BUD23	sp|P25627|BUD23_YEAST 18S rRNA (guanine(1575)-N(7))-methyltransferase OS=Saccharomyces cerevisiae (strain ATCC 204508 / S288c) GN=BUD23 PE=1 SV=1	1	4	19.6	30.742	275	0	29.188	180470000	0	0	292370	0	0	3008100	0	1512400	13901000	0	0	0	828840	0	0	0	0	0	0	0	0	1260900	0	0	0	0	0	1471400	481600	147220000	1763900	0	0	0	2924000	2522300	3281000	0
Q08981	APC/C-CDH1 modulator 1	ACM1	sp|Q08981|ACM1_YEAST APC/C-CDH1 modulator 1 OS=Saccharomyces cerevisiae (strain ATCC 204508 / S288c) GN=ACM1 PE=1 SV=1	1	3	12.4	23.87	209	0	4.7292	67471000	0	0	0	0	0	0	0	0	0	0	0	0	0	0	0	0	0	0	0	0	0	0	0	0	0	0	0	0	0	0	0	9152800	41292000	7728400	2910600	0	6387300	0
P40531	Protein GVP36	GVP36	sp|P40531|GVP36_YEAST Protein GVP36 OS=Saccharomyces cerevisiae (strain ATCC 204508 / S288c) GN=GVP36 PE=1 SV=1	1	10	38.3	36.67	326	0	139.03	298460000	0	0	0	0	14754000	0	0	17650000	0	0	0	0	0	0	0	2028700	4487200	0	0	0	0	0	5355700	0	0	0	245960000	4038800	0	355600	0	972850	0	0	2859100	0	0	0
P0CX26;P0CX25	60S ribosomal protein L43-B;60S ribosomal protein L43-A	RPL43B;RPL43A	sp|P0CX26|RL43B_YEAST 60S ribosomal protein L43-B OS=Saccharomyces cerevisiae (strain ATCC 204508 / S288c) GN=RPL43B PE=1 SV=1;sp|P0CX25|RL43A_YEAST 60S ribosomal protein L43-A OS=Saccharomyces cerevisiae (strain ATCC 204508 / S288c) GN=RPL43A PE=1 SV=1	2	5	38	10.091	92	0	133.77	1775100000	0	0	1135400	0	0	0	0	0	0	0	0	0	0	13121000	0	0	0	0	0	0	2635700	0	3094700	0	1071900	0	1325100	833260	8683200	3732200	1074100	2391700	0	0	2847600	22336000	9169100	39442000
P38784	Vacuolar ATPase assembly protein VMA22	VMA22	sp|P38784|VMA22_YEAST Vacuolar ATPase assembly protein VMA22 OS=Saccharomyces cerevisiae (strain ATCC 204508 / S288c) GN=VMA22 PE=1 SV=1	1	2	9.9	21.077	181	0	5.141	70902000	542110	0	0	0	0	0	0	0	0	0	0	0	3143900	0	0	0	0	0	1582500	0	0	0	0	0	0	0	0	0	0	0	0	0	0	0	2824400	62809000	0	0
P38281	Actin patches distal protein 1	APD1	sp|P38281|APD1_YEAST Actin patches distal protein 1 OS=Saccharomyces cerevisiae (strain ATCC 204508 / S288c) GN=APD1 PE=1 SV=1	1	6	18.4	35.758	316	0	20.836	132010000	0	0	0	0	0	0	0	0	1180400	0	0	0	0	0	0	0	0	0	0	0	0	722310	0	12557000	0	0	422260	48882000	47840000	12206000	0	3111100	1862300	0	2816700	0	0	410500
P15624	Phenylalanine--tRNA ligase beta subunit	FRS1	sp|P15624|SYFB_YEAST Phenylalanine--tRNA ligase beta subunit OS=Saccharomyces cerevisiae (strain ATCC 204508 / S288c) GN=FRS1 PE=1 SV=3	1	10	17.6	67.364	595	0	98.101	230370000	0	0	0	0	0	0	0	0	0	0	0	0	0	0	0	0	2079100	0	0	3655400	174120000	2777100	0	0	0	5098400	2896200	0	0	10553000	0	0	3224600	2170300	2815000	7213200	11066000	0
Q05874	Protein N-methyltransferase NNT1	NNT1	sp|Q05874|NNT1_YEAST Protein N-methyltransferase NNT1 OS=Saccharomyces cerevisiae (strain ATCC 204508 / S288c) GN=NNT1 PE=1 SV=1	1	3	12.3	29.632	261	0	21.737	335010000	0	0	0	0	0	0	0	0	0	0	0	0	0	0	0	0	0	0	0	0	0	0	0	0	0	0	0	0	2082500	0	256900000	29197000	0	3161100	2813500	0	1943500	0
P39516	40S ribosomal protein S14-B	RPS14B	sp|P39516|RS14B_YEAST 40S ribosomal protein S14-B OS=Saccharomyces cerevisiae (strain ATCC 204508 / S288c) GN=RPS14B PE=1 SV=2	1	10	68.8	14.65	138	0	323.31	12454000000	12411000	950450000	9954200	0	0	0	0	8485300	0	0	0	0	6714400	4197200	0	0	0	0	0	4612200	25390000	0	2200500	4490200	2323700	0	0	0	3715000	2564400	0	4286700	0	3118800	2799800	22855000	908190000	9908300000
P15703	Glucan 1,3-beta-glucosidase	BGL2	sp|P15703|BGL2_YEAST Glucan 1,3-beta-glucosidase OS=Saccharomyces cerevisiae (strain ATCC 204508 / S288c) GN=BGL2 PE=1 SV=1	1	6	23.3	34.118	313	0	197.39	1246400000	0	0	0	0	0	0	0	768600	14525000	0	0	0	0	0	0	0	0	0	0	0	0	0	0	0	0	0	6249100	26869000	73400000	1050200000	48439000	15672000	0	1600100	2743600	3593900	1620700	712510
Q12159	RNA annealing protein YRA1	YRA1	sp|Q12159|YRA1_YEAST RNA annealing protein YRA1 OS=Saccharomyces cerevisiae (strain ATCC 204508 / S288c) GN=YRA1 PE=1 SV=2	1	3	17.7	24.955	226	0	10.524	59903000	0	0	0	0	0	0	0	0	0	0	0	0	0	0	0	0	0	0	0	0	0	0	0	0	0	0	0	0	0	0	0	46078000	3676500	0	2740600	3428000	2734900	1244800
P07273	Transcription elongation factor S-II	DST1	sp|P07273|TFS2_YEAST Transcription elongation factor S-II OS=Saccharomyces cerevisiae (strain ATCC 204508 / S288c) GN=DST1 PE=1 SV=4	1	10	32.7	34.843	309	0	140.77	569590000	0	0	1342800	0	0	0	0	54689000	0	0	0	0	0	0	0	0	467920	0	0	93005	3283200	0	3785900	1306100	1121900	138080000	339030000	3637200	3518600	0	9021000	0	940030	3166600	2714200	0	0	0
P21242	Probable proteasome subunit alpha type-7	PRE10	sp|P21242|PSA7_YEAST Probable proteasome subunit alpha type-7 OS=Saccharomyces cerevisiae (strain ATCC 204508 / S288c) GN=PRE10 PE=1 SV=2	1	6	23.3	31.536	288	0	238.32	489690000	0	0	0	0	0	0	0	0	3125800	0	0	0	0	1237300	0	0	0	0	0	1826400	0	5634900	0	0	0	0	0	0	9400000	434080000	16621000	5651100	0	2194000	2676900	1159300	5054800	0
P40991	25S rRNA (cytosine(2870)-C(5))-methyltransferase	NOP2	sp|P40991|NOP2_YEAST 25S rRNA (cytosine(2870)-C(5))-methyltransferase OS=Saccharomyces cerevisiae (strain ATCC 204508 / S288c) GN=NOP2 PE=1 SV=1	1	18	31.1	69.811	618	0	140.74	2066800000	888080	1105500	2804600	2874500	677220	0	618970	0	0	0	0	0	0	1435700	25485000	53935000	340200000	576680000	338390000	53186000	36377000	17626000	59255000	111300000	222160000	3855100	11769000	101660000	19257000	37025000	5117300	9632700	3750500	2435500	2667600	8708900	8778200	6068100
P32588	Nuclear and cytoplasmic polyadenylated RNA-binding protein PUB1	PUB1	sp|P32588|PUB1_YEAST Nuclear and cytoplasmic polyadenylated RNA-binding protein PUB1 OS=Saccharomyces cerevisiae (strain ATCC 204508 / S288c) GN=PUB1 PE=1 SV=4	1	2	4.9	50.762	453	0	3.5439	120850000	0	0	0	0	814400	0	0	0	0	0	0	0	0	0	0	0	0	0	0	0	0	0	0	48731000	3985900	0	28994000	15059000	3340400	0	6034800	0	2926600	3836800	2642200	1280300	2162200	0
P19073	Cell division control protein 42	CDC42	sp|P19073|CDC42_YEAST Cell division control protein 42 OS=Saccharomyces cerevisiae (strain ATCC 204508 / S288c) GN=CDC42 PE=1 SV=2	1	2	14.7	21.322	191	0	40.682	681680000	9530500	0	0	0	0	2387000	0	0	0	0	0	0	550140	0	0	0	0	0	0	0	0	0	0	0	0	0	3963000	1885200	3202500	0	7868100	8815200	4676300	7858900	2627700	107030000	450440000	48006000
P25567	RNA-binding protein SRO9	SRO9	sp|P25567|SRO9_YEAST RNA-binding protein SRO9 OS=Saccharomyces cerevisiae (strain ATCC 204508 / S288c) GN=SRO9 PE=1 SV=2	1	3	11.3	48.059	434	0	28.185	45994000	0	0	0	0	0	623400	0	0	0	0	0	0	0	0	0	740950	0	324420	1140100	0	1495400	0	2248800	23548000	5053700	0	2873800	1885300	1404300	0	0	1310900	0	0	2581300	0	763860	0
P32793	Protein YSC84	YSC84	sp|P32793|YSC84_YEAST Protein YSC84 OS=Saccharomyces cerevisiae (strain ATCC 204508 / S288c) GN=YSC84 PE=1 SV=2	1	8	17.5	50.901	468	0	20.209	292440000	0	0	0	0	986680	47355000	0	806720	959810	0	0	0	708680	180030	0	366660	0	473810	0	0	0	0	0	0	128580000	12208000	5758200	9556700	9455600	27341000	6463700	2440200	10391000	2130600	2535600	0	4359700	3005600
P32656	Glutathione-specific gamma-glutamylcyclotransferase	GCG1	sp|P32656|CHAC_YEAST Glutathione-specific gamma-glutamylcyclotransferase OS=Saccharomyces cerevisiae (strain ATCC 204508 / S288c) GN=GCG1 PE=1 SV=1	1	4	22.4	26.293	232	0	26.507	119890000	0	0	0	0	0	0	0	0	0	0	0	0	0	0	0	0	0	0	0	0	0	5370900	0	6886600	0	0	0	0	0	0	0	101340000	3121300	0	2524800	0	0	641080
P43588	Ubiquitin carboxyl-terminal hydrolase RPN11	RPN11	sp|P43588|RPN11_YEAST Ubiquitin carboxyl-terminal hydrolase RPN11 OS=Saccharomyces cerevisiae (strain ATCC 204508 / S288c) GN=RPN11 PE=1 SV=1	1	9	31.4	34.398	306	0	68.066	921810000	0	2646300	2524500	3040100	0	0	0	0	123550000	0	0	0	0	382620	0	0	0	39303000	0	0	0	0	26439000	1367000	1952800	0	0	2545900	434180000	213550000	2920400	1440900	0	8368700	2442800	12764000	34828000	0
P06785	Thymidylate synthase	CDC21	sp|P06785|TYSY_YEAST Thymidylate synthase OS=Saccharomyces cerevisiae (strain ATCC 204508 / S288c) GN=CDC21 PE=1 SV=1	1	5	20.1	35.047	304	0	61.97	135610000	0	0	0	0	0	5464500	0	0	0	0	0	0	0	0	0	0	0	0	0	0	0	0	0	0	0	0	9302600	1143400	0	112850000	0	3191000	0	0	2400500	0	0	295340
Q12163	NAP1-binding protein 2	NBP2	sp|Q12163|NBP2_YEAST NAP1-binding protein 2 OS=Saccharomyces cerevisiae (strain ATCC 204508 / S288c) GN=NBP2 PE=1 SV=1	1	3	18.2	26.57	236	0	38.138	68827000	0	0	0	0	0	0	0	0	0	0	0	0	0	0	1576000	0	0	0	0	0	0	0	0	0	0	0	0	1480700	338760	43287000	989150	0	5342100	12531000	2399300	0	0	0
P47912	Long-chain-fatty-acid--CoA ligase 4	FAA4	sp|P47912|LCF4_YEAST Long-chain-fatty-acid--CoA ligase 4 OS=Saccharomyces cerevisiae (strain ATCC 204508 / S288c) GN=FAA4 PE=1 SV=1	1	1	1.7	77.266	694	0	6.1734	39825000	0	0	0	0	1275900	0	0	0	0	0	0	0	0	0	2022800	2029200	0	923040	0	5901000	10921000	0	0	2563500	0	0	0	3045200	0	0	0	2157500	3863700	2723200	2398500	0	0	0
Q3E7Y3;P0C0W1	40S ribosomal protein S22-B;40S ribosomal protein S22-A	RPS22B;RPS22A	sp|Q3E7Y3|RS22B_YEAST 40S ribosomal protein S22-B OS=Saccharomyces cerevisiae (strain ATCC 204508 / S288c) GN=RPS22B PE=1 SV=3;sp|P0C0W1|RS22A_YEAST 40S ribosomal protein S22-A OS=Saccharomyces cerevisiae (strain ATCC 204508 / S288c) GN=RPS22A PE=1 SV=2	2	6	57.7	14.626	130	0	174.53	588250000	0	44357000	8011800	0	0	0	0	0	0	0	0	0	0	3224200	0	0	0	0	0	1548800	0	0	3652300	0	0	0	0	0	2133500	0	0	0	0	0	2384200	7461400	16368000	418120000
Q08492	Bud site selection protein 21	BUD21	sp|Q08492|BUD21_YEAST Bud site selection protein 21 OS=Saccharomyces cerevisiae (strain ATCC 204508 / S288c) GN=BUD21 PE=1 SV=1	1	6	29.9	24.385	214	0	172.02	413140000	2085100	0	0	0	0	0	0	0	25126000	0	0	0	0	0	0	0	0	0	0	0	1683600	0	0	5607500	0	0	7873200	2562500	67087000	246410000	2597800	35317000	2034400	0	2369100	0	4213200	8173700
Q03161	Glucose-6-phosphate 1-epimerase		sp|Q03161|YMY9_YEAST Glucose-6-phosphate 1-epimerase OS=Saccharomyces cerevisiae (strain ATCC 204508 / S288c) GN=YMR099C PE=1 SV=1	1	4	14.5	33.955	297	0	4.026	84733000	0	0	0	0	0	0	0	0	5948500	0	0	0	0	0	0	0	0	0	0	0	0	0	0	0	0	0	17612000	5657600	43681000	7071900	0	0	0	0	2348000	2414500	0	0
P34247	U3 small nucleolar RNA-associated protein 11	UTP11	sp|P34247|UTP11_YEAST U3 small nucleolar RNA-associated protein 11 OS=Saccharomyces cerevisiae (strain ATCC 204508 / S288c) GN=UTP11 PE=1 SV=2	1	9	34.4	29.735	250	0	106.26	530830000	0	0	0	0	0	0	0	0	0	0	0	0	0	0	622820	0	0	0	0	0	0	0	0	7055300	0	0	0	0	0	514280000	1195600	0	0	3911200	2347500	1412500	0	0
P40169	Uncharacterized plasma membrane protein YNL194C		sp|P40169|YNT4_YEAST Uncharacterized plasma membrane protein YNL194C OS=Saccharomyces cerevisiae (strain ATCC 204508 / S288c) GN=YNL194C PE=1 SV=1	1	4	12	34.081	301	0	8.0091	85519000	0	0	0	0	2473300	1364100	2443600	0	748320	0	0	0	0	0	2657200	0	0	1008500	0	0	0	0	0	0	0	0	0	6216200	45426000	9602400	8559900	1157800	0	1525700	2335800	0	0	0
Q99325	Uncharacterized membrane protein YOR152C		sp|Q99325|ATG40_YEAST Autophagy-related protein 40 OS=Saccharomyces cerevisiae (strain ATCC 204508 / S288c) GN=ATG40 PE=1 SV=1	1	2	7.4	29.692	256	0	2.9519	20604000	0	0	0	0	0	0	0	0	0	0	0	0	0	0	0	0	0	0	0	0	0	0	0	4725700	0	0	0	0	2341800	1114700	0	0	0	6198400	2321700	0	3901900	0
P39078	T-complex protein 1 subunit delta	CCT4	sp|P39078|TCPD_YEAST T-complex protein 1 subunit delta OS=Saccharomyces cerevisiae (strain ATCC 204508 / S288c) GN=CCT4 PE=1 SV=2	1	13	29.2	57.603	528	0	162.73	729480000	0	0	0	0	0	3630300	0	0	0	0	0	0	0	0	0	0	0	0	0	0	0	0	381570000	139950000	39611000	0	18223000	8082100	12457000	12648000	6986600	25015000	17932000	5086000	2318300	3896600	31465000	1205100
P38074	Protein arginine N-methyltransferase 1	HMT1	sp|P38074|HMT1_YEAST Protein arginine N-methyltransferase 1 OS=Saccharomyces cerevisiae (strain ATCC 204508 / S288c) GN=HMT1 PE=1 SV=1	1	7	19.3	39.786	348	0	48.33	448730000	0	0	1548400	0	0	0	2344600	3777100	0	0	0	0	0	0	0	785760	0	1230600	2275500	9956000	1891100	0	0	0	0	323540000	49645000	2781600	3014800	15991000	0	0	0	0	2259800	12454000	6058300	4075900
P14747;P23287	Serine/threonine-protein phosphatase 2B catalytic subunit A2	CMP2	sp|P14747|PP2B2_YEAST Serine/threonine-protein phosphatase 2B catalytic subunit A2 OS=Saccharomyces cerevisiae (strain ATCC 204508 / S288c) GN=CMP2 PE=1 SV=2	2	7	14.1	68.527	604	0	101.31	144790000	0	0	0	0	0	0	0	0	0	0	0	0	0	0	0	0	0	0	0	0	91947000	3917400	10209000	964240	0	11229000	783830	872740	1780500	3096500	6419100	2651100	2720000	1533900	2222500	1058400	3381200	0
P23644	Mitochondrial import receptor subunit TOM40	TOM40	sp|P23644|TOM40_YEAST Mitochondrial import receptor subunit TOM40 OS=Saccharomyces cerevisiae (strain ATCC 204508 / S288c) GN=TOM40 PE=1 SV=1	1	1	4.1	42.038	387	0	5.4018	556940000	127030000	85284000	41727000	83800000	86138000	119990000	8257800	0	0	0	0	0	2555800	0	0	0	0	0	0	0	0	0	0	0	0	0	0	0	0	0	0	0	0	0	2155100	0	0	0
P16862	ATP-dependent 6-phosphofructokinase subunit beta	PFK2	sp|P16862|PFKA2_YEAST ATP-dependent 6-phosphofructokinase subunit beta OS=Saccharomyces cerevisiae (strain ATCC 204508 / S288c) GN=PFK2 PE=1 SV=4	1	7	9	104.62	959	0	22.71	137740000	0	0	0	0	0	11653000	0	0	0	0	0	0	0	0	0	0	23469000	63500000	16533000	0	2362800	0	0	0	0	1926300	3670800	0	0	767820	0	0	0	0	2147200	0	0	7008400
P38116	ADP-ribosylation factor-like protein 1	ARL1	sp|P38116|ARL1_YEAST ADP-ribosylation factor-like protein 1 OS=Saccharomyces cerevisiae (strain ATCC 204508 / S288c) GN=ARL1 PE=1 SV=4	1	4	24	20.434	183	0	46.126	499150000	0	0	0	0	0	7792800	0	0	0	0	0	0	0	0	0	0	0	0	0	0	1359500	0	0	2704800	17133000	0	0	7267000	0	0	0	551680	0	0	2139800	37948000	414000000	0
P38882	U3 small nucleolar RNA-associated protein 9	UTP9	sp|P38882|UTP9_YEAST U3 small nucleolar RNA-associated protein 9 OS=Saccharomyces cerevisiae (strain ATCC 204508 / S288c) GN=UTP9 PE=1 SV=1	1	14	27	65.271	575	0	179.76	465480000	0	0	0	0	0	0	197530	0	0	0	0	0	145250	546550	0	3479300	0	0	0	1947100	66853000	188070000	138730000	10027000	1236200	1386200	0	406850	2034100	0	0	3922600	0	0	2136700	3784300	29224000	3554300
P53290	GTP-binding protein GTR2	GTR2	sp|P53290|GTR2_YEAST GTP-binding protein GTR2 OS=Saccharomyces cerevisiae (strain ATCC 204508 / S288c) GN=GTR2 PE=1 SV=1	1	5	14.1	38.6	341	0	73.806	479490000	0	0	0	0	0	0	0	0	13390000	0	0	0	0	0	3850600	870170	0	0	0	0	0	0	0	0	0	93732000	7366000	218170000	103890000	13839000	0	0	0	3761400	2128600	3754500	11671000	0
P40543	Uncharacterized protein YIL024C	YIL024C	sp|P40543|YIC4_YEAST Uncharacterized protein YIL024C OS=Saccharomyces cerevisiae (strain ATCC 204508 / S288c) GN=YIL024C PE=1 SV=1	1	3	20.6	21.791	189	0	6.9977	49955000	0	0	0	0	0	0	0	0	0	0	0	0	0	0	0	0	0	0	0	0	0	0	0	0	0	0	0	0	0	0	0	0	4928000	42191000	2121800	0	0	714480
P05373	Delta-aminolevulinic acid dehydratase	HEM2	sp|P05373|HEM2_YEAST Delta-aminolevulinic acid dehydratase OS=Saccharomyces cerevisiae (strain ATCC 204508 / S288c) GN=HEM2 PE=1 SV=2	1	7	24.6	37.74	342	0	149.77	386920000	0	0	0	0	0	21096000	959640	0	0	0	0	0	0	0	0	0	0	0	0	0	0	0	0	0	0	0	48277000	218320000	81459000	0	4594300	0	3810100	739600	2096900	0	0	0
P32445	Single-stranded DNA-binding protein RIM1, mitochondrial	RIM1	sp|P32445|RIM1_YEAST Single-stranded DNA-binding protein RIM1, mitochondrial OS=Saccharomyces cerevisiae (strain ATCC 204508 / S288c) GN=RIM1 PE=1 SV=1	1	6	48.1	15.386	135	0	323.31	2096100000	0	3351900	429110000	0	0	0	0	0	0	0	0	0	0	28646000	0	2337000	1169500	0	1115400	0	0	0	0	0	0	0	0	1187000	282900	0	0	0	0	0	2091300	0	0	0
P39009	DNA damage response protein kinase DUN1	DUN1	sp|P39009|DUN1_YEAST DNA damage response protein kinase DUN1 OS=Saccharomyces cerevisiae (strain ATCC 204508 / S288c) GN=DUN1 PE=1 SV=1	1	14	27.5	58.632	513	0	230.76	1141700000	796280	50683000	45295000	1868900	0	0	2035200	0	0	0	3170000	640650	851400	0	1054600	0	0	0	0	1935300	0	2458800	6662800	567250000	7049600	8832100	39569000	25281000	5144800	2228700	3917700	9739800	181130000	1254800	2065800	1741900	106760000	23327000
Q06679	U3 small nucleolar RNA-associated protein 4	UTP4	sp|Q06679|UTP4_YEAST U3 small nucleolar RNA-associated protein 4 OS=Saccharomyces cerevisiae (strain ATCC 204508 / S288c) GN=UTP4 PE=1 SV=1	1	21	26.7	87.8	776	0	323.31	1518400000	1890000	8802400	0	6747600	2666000	6421100	5026100	5143200	5345000	0	3257900	13292000	5349300	0	8566300	9970500	1036500000	161770000	16967000	12232000	37058000	10884000	21877000	85623000	2007300	2612600	2858500	0	181460	0	3394300	15147000	2796200	4608300	2064600	5932500	8196400	0
P35182	Protein phosphatase 2C homolog 1	PTC1	sp|P35182|PP2C1_YEAST Protein phosphatase 2C homolog 1 OS=Saccharomyces cerevisiae (strain ATCC 204508 / S288c) GN=PTC1 PE=1 SV=1	1	2	7.5	31.549	281	0	4.0754	26851000	0	0	0	0	0	0	0	0	0	0	0	0	0	0	0	0	0	0	0	0	0	0	0	0	0	0	0	0	0	0	740650	18498000	2161100	0	2063100	0	3387700	0
P53077	Maintenance of telomere capping protein 3, mitochondrial	MTC3	sp|P53077|MTC3_YEAST Maintenance of telomere capping protein 3, mitochondrial OS=Saccharomyces cerevisiae (strain ATCC 204508 / S288c) GN=MTC3 PE=1 SV=1	1	1	6.5	14.488	123	0.0092365	1.65	186440000	0	0	0	0	0	0	0	0	0	0	0	0	0	0	0	0	0	0	0	0	0	0	0	0	0	0	0	0	0	0	0	0	8067200	0	2043700	0	173570000	2757300
P17157	Cyclin-dependent protein kinase PHO85	PHO85	sp|P17157|PHO85_YEAST Cyclin-dependent protein kinase PHO85 OS=Saccharomyces cerevisiae (strain ATCC 204508 / S288c) GN=PHO85 PE=1 SV=2	1	8	27.2	34.906	305	0	25.428	456190000	0	0	0	0	0	0	0	0	26499000	0	0	4824500	0	0	0	0	0	0	0	0	0	0	0	0	0	0	0	0	40882000	362500000	0	6535900	0	0	2040000	5069300	5701100	0
Q12125	Golgi to ER traffic protein 4	GET4	sp|Q12125|GET4_YEAST Golgi to ER traffic protein 4 OS=Saccharomyces cerevisiae (strain ATCC 204508 / S288c) GN=GET4 PE=1 SV=1	1	10	38.8	36.28	312	0	233.65	606570000	0	0	0	0	0	0	1367600	7663800	1201500	0	0	0	0	0	0	774630	0	0	0	2607400	0	0	0	23585000	0	74634000	0	2171900	0	436090000	4544400	8990700	7499900	7402300	2037300	24241000	1760200	0
P38182	Autophagy-related protein 8	ATG8	sp|P38182|ATG8_YEAST Autophagy-related protein 8 OS=Saccharomyces cerevisiae (strain ATCC 204508 / S288c) GN=ATG8 PE=1 SV=1	1	2	7.7	13.627	117	0.0032425	2.1567	53432000	0	0	0	0	0	0	0	0	0	0	0	0	0	0	0	0	0	0	0	0	0	0	0	0	0	0	0	0	0	0	0	0	0	0	2020700	0	0	0
P07342	Acetolactate synthase catalytic subunit, mitochondrial	ILV2	sp|P07342|ILVB_YEAST Acetolactate synthase catalytic subunit, mitochondrial OS=Saccharomyces cerevisiae (strain ATCC 204508 / S288c) GN=ILV2 PE=1 SV=1	1	23	40.9	74.936	687	0	323.31	3936200000	0	5045400	556790	1093900	1874700000	10502000	3745400	7719800	7203400	0	988020	552350	2463500	0	5056600	2839900	6513100	2632600	5196300	13506000	1017300000	294080000	65074000	72959000	137290000	23044000	95146000	29309000	14560000	64243000	9656700	12170000	672760	7920300	1995400	7454700	18872000	2727100
P38805	Ribosome production factor 1	RPF1	sp|P38805|RPF1_YEAST Ribosome production factor 1 OS=Saccharomyces cerevisiae (strain ATCC 204508 / S288c) GN=RPF1 PE=1 SV=1	1	18	54.2	35.121	295	0	323.31	2194600000	0	0	0	514750	0	0	0	2478600	18260000	0	0	0	0	0	0	0	0	1704800	0	358390	0	3550000	0	25970000	157800000	7233800	56925000	1631000000	177480000	18848000	12556000	41116000	7909800	7316000	1945700	13623000	8005700	0
P06105	Protein SCP160	SCP160	sp|P06105|SC160_YEAST Protein SCP160 OS=Saccharomyces cerevisiae (strain ATCC 204508 / S288c) GN=SCP160 PE=1 SV=3	1	3	2.2	134.81	1222	0	3.7275	116720000	6621900	0	2740200	0	4002900	0	51777000	3088300	0	0	0	0	0	0	16028000	8867900	1651200	1320300	2035400	747560	442040	2000500	1025200	0	0	0	0	0	0	0	0	0	0	12430000	1944800	0	0	0
Q3E754;P0C0V8	40S ribosomal protein S21-B;40S ribosomal protein S21-A	RPS21B;RPS21A	sp|Q3E754|RS21B_YEAST 40S ribosomal protein S21-B OS=Saccharomyces cerevisiae (strain ATCC 204508 / S288c) GN=RPS21B PE=1 SV=1;sp|P0C0V8|RS21A_YEAST 40S ribosomal protein S21-A OS=Saccharomyces cerevisiae (strain ATCC 204508 / S288c) GN=RPS21A PE=1 SV=1	2	2	21.8	9.7597	87	0	3.2472	32507000	0	0	0	0	0	0	0	0	0	0	0	0	0	0	0	0	0	0	0	0	0	0	0	0	0	0	0	0	0	0	0	0	0	0	1923600	0	2073700	0
Q06338	Protein BCP1	BCP1	sp|Q06338|BCP1_YEAST Protein BCP1 OS=Saccharomyces cerevisiae (strain ATCC 204508 / S288c) GN=BCP1 PE=1 SV=1	1	8	33.9	32.661	283	0	90.674	587760000	0	0	0	0	0	0	0	0	30975000	0	0	0	0	0	1921000	1850900	0	0	0	0	0	4024400	3276000	0	0	0	6148800	326910000	72146000	112590000	4169800	0	3833100	13162000	1903400	0	0	0
P32485	Mitogen-activated protein kinase HOG1	HOG1	sp|P32485|HOG1_YEAST Mitogen-activated protein kinase HOG1 OS=Saccharomyces cerevisiae (strain ATCC 204508 / S288c) GN=HOG1 PE=1 SV=2	1	1	2.3	48.858	435	0	2.8096	56243000	0	0	0	0	0	1492000	0	0	0	0	0	0	0	0	0	0	0	0	0	0	0	0	0	0	0	4507700	7226200	7690900	4493300	5051100	4509200	2975700	0	2256900	1891500	1328100	5900400	3085200
Q99216	Pre-rRNA-processing protein PNO1	PNO1	sp|Q99216|PNO1_YEAST Pre-rRNA-processing protein PNO1 OS=Saccharomyces cerevisiae (strain ATCC 204508 / S288c) GN=PNO1 PE=1 SV=1	1	8	27.7	30.331	274	0	135.97	484270000	0	0	199220	0	0	0	0	0	2437500	0	0	0	0	0	0	0	0	5617000	0	0	0	0	0	6979300	0	0	0	0	5355000	420230000	22868000	10168000	6140700	334920	1848200	0	0	0
P00360	Glyceraldehyde-3-phosphate dehydrogenase 1	TDH1	sp|P00360|G3P1_YEAST Glyceraldehyde-3-phosphate dehydrogenase 1 OS=Saccharomyces cerevisiae (strain ATCC 204508 / S288c) GN=TDH1 PE=1 SV=3	1	13	44.9	35.75	332	0	58.504	604160000	0	0	0	2641900	0	1834900	0	0	0	0	0	0	0	0	0	0	0	0	0	0	9524200	2276600	3745800	0	0	0	1999400	251130000	276510000	15291000	0	9592700	0	0	1833200	5015300	22773000	0
P21269	CCA tRNA nucleotidyltransferase, mitochondrial	CCA1	sp|P21269|CCA1_YEAST CCA tRNA nucleotidyltransferase, mitochondrial OS=Saccharomyces cerevisiae (strain ATCC 204508 / S288c) GN=CCA1 PE=1 SV=1	1	7	13.2	62.484	546	0	21.969	137790000	0	0	0	0	0	0	0	0	0	0	0	0	0	0	0	0	0	0	0	0	0	0	37056000	95772000	0	0	0	0	0	0	0	0	0	3133200	1826100	0	0	0
Q06505	Transcription factor SPN1	SPN1	sp|Q06505|IWS1_YEAST Transcription factor SPN1 OS=Saccharomyces cerevisiae (strain ATCC 204508 / S288c) GN=SPN1 PE=1 SV=1	1	2	5.9	46.082	410	0	4.2266	27354000	0	0	0	0	0	0	0	0	0	0	0	0	0	0	0	0	0	0	0	0	0	0	0	0	3120200	3676800	1433500	0	8604800	0	0	4552400	858780	0	1824600	0	0	0
P38629	Replication factor C subunit 3	RFC3	sp|P38629|RFC3_YEAST Replication factor C subunit 3 OS=Saccharomyces cerevisiae (strain ATCC 204508 / S288c) GN=RFC3 PE=1 SV=1	1	13	42.6	38.203	340	0	323.31	1837100000	0	0	0	0	3668300	0	0	2035800	0	0	0	0	0	0	0	0	0	0	0	0	0	0	4788600	0	1521700	72697000	1042500000	445380000	109900000	136530000	2322900	0	5049500	3872600	1793500	0	0	0
P43565	Serine/threonine-protein kinase RIM15	RIM15	sp|P43565|RIM15_YEAST Serine/threonine-protein kinase RIM15 OS=Saccharomyces cerevisiae (strain ATCC 204508 / S288c) GN=RIM15 PE=1 SV=1	1	2	1.4	196.53	1770	0	8.3764	21623000	0	0	0	0	0	0	0	0	0	0	0	0	0	0	0	0	0	0	0	0	0	0	0	0	0	0	0	0	553020	0	0	368210	4476000	12279000	1793300	0	0	1539700
Q04175	Importin beta SMX1	SXM1	sp|Q04175|SXM1_YEAST Importin beta SMX1 OS=Saccharomyces cerevisiae (strain ATCC 204508 / S288c) GN=SXM1 PE=1 SV=1	1	6	6.1	108.4	944	0	50.926	50779000	0	0	0	0	6643200	0	0	0	936450	0	0	0	0	0	2222200	34093000	0	0	0	0	0	0	0	0	0	0	0	0	0	0	0	886990	0	0	1738700	0	0	0
P49723	Ribonucleoside-diphosphate reductase small chain 2	RNR4	sp|P49723|RIR4_YEAST Ribonucleoside-diphosphate reductase small chain 2 OS=Saccharomyces cerevisiae (strain ATCC 204508 / S288c) GN=RNR4 PE=1 SV=1	1	12	41.4	40.054	345	0	323.31	1892700000	463420	0	1085900	0	0	83656000	458940	87430000	1508100	0	0	477030	1983900	0	0	0	713780	2607300	0	1068400	0	1408700	0	0	0	884390000	542430000	116350000	95856000	32692000	8058400	3141300	1426200	1609600	1707000	6151900	8685300	2803000
P53846	Uncharacterized ORAOV1 family protein YNL260C		sp|P53846|YN00_YEAST Uncharacterized ORAOV1 family protein YNL260C OS=Saccharomyces cerevisiae (strain ATCC 204508 / S288c) GN=YNL260C PE=1 SV=1	1	2	9.1	23.328	198	0	3.7945	100100000	0	0	0	4545000	0	0	0	0	8160300	0	0	0	0	0	0	0	0	0	0	16268000	0	0	0	22632000	0	0	0	0	0	0	0	0	4951100	0	1689300	0	41850000	0
P47112	Cell division cycle protein CDT1	TAH11	sp|P47112|CDT1_YEAST Cell division cycle protein CDT1 OS=Saccharomyces cerevisiae (strain ATCC 204508 / S288c) GN=TAH11 PE=1 SV=1	1	3	4.6	68.404	604	0	3.7541	51282000	0	2134100	0	0	0	460870	0	5350100	2829000	0	608970	0	0	527500	0	0	0	0	0	0	12944000	0	721620	0	5126100	0	1366000	0	1010100	0	913920	6672000	3968400	2024700	1669900	0	0	0
P25040	20S rRNA accumulation protein 4	TSR4	sp|P25040|TSR4_YEAST 20S rRNA accumulation protein 4 OS=Saccharomyces cerevisiae (strain ATCC 204508 / S288c) GN=TSR4 PE=1 SV=2	1	2	5.6	45.993	408	0	5.4237	26649000	0	0	0	0	0	0	0	0	0	0	0	0	0	0	0	0	0	0	0	0	0	0	0	0	8037200	0	0	0	0	0	2361600	1882200	1694900	2715200	1664400	1168200	2600400	1645500
P36054	Calcipressin-like protein	RCN1	sp|P36054|RCN1_YEAST Calcipressin-like protein OS=Saccharomyces cerevisiae (strain ATCC 204508 / S288c) GN=RCN1 PE=1 SV=1	1	2	12.3	24.135	211	0	65.053	54056000	0	0	0	0	0	0	3157700	0	0	0	0	0	0	0	0	0	0	0	0	0	0	0	0	0	0	0	282120	0	0	0	0	0	5190900	22883000	1634800	3919200	16141000	531250
Q04177	U3 small nucleolar RNA-associated protein 5	UTP5	sp|Q04177|UTP5_YEAST U3 small nucleolar RNA-associated protein 5 OS=Saccharomyces cerevisiae (strain ATCC 204508 / S288c) GN=UTP5 PE=1 SV=1	1	4	6.5	72.001	643	0	15.53	102300000	0	0	2278100	0	9876100	0	0	0	0	0	0	0	0	0	986640	0	0	0	0	1552400	27469000	0	0	0	1569700	11830000	17191000	7028500	4846400	11269000	0	0	0	0	1532900	0	2351500	0
P10363	DNA primase small subunit	PRI1	sp|P10363|PRI1_YEAST DNA primase small subunit OS=Saccharomyces cerevisiae (strain ATCC 204508 / S288c) GN=PRI1 PE=1 SV=2	1	10	24.7	47.69	409	0	44.16	686920000	0	0	532630	1925200	0	176900000	960140	43875000	384570	0	0	0	0	0	0	703460	0	0	0	353510	3738500	1673500	3609700	0	3673200	377230000	47662000	7433000	4100300	6802000	0	1057800	0	0	1527800	0	0	2326800
P00358	Glyceraldehyde-3-phosphate dehydrogenase 2	TDH2	sp|P00358|G3P2_YEAST Glyceraldehyde-3-phosphate dehydrogenase 2 OS=Saccharomyces cerevisiae (strain ATCC 204508 / S288c) GN=TDH2 PE=1 SV=3	1	15	41.9	35.846	332	0	74.682	587840000	0	0	0	0	0	0	0	0	7633100	0	0	0	0	320120	0	0	0	0	0	0	0	0	0	0	0	0	4109300	463010000	48765000	26889000	15061000	0	0	2581900	1521300	2303500	7243000	2182400
P52286	Suppressor of kinetochore protein 1	SKP1	sp|P52286|SKP1_YEAST Suppressor of kinetochore protein 1 OS=Saccharomyces cerevisiae (strain ATCC 204508 / S288c) GN=SKP1 PE=1 SV=2	1	4	20.1	22.33	194	0	13.563	104890000	0	0	0	0	0	0	0	0	0	0	0	0	0	0	0	0	0	0	6197700	0	0	0	0	0	4066400	0	0	0	0	0	368110	0	92741000	0	1517000	0	0	0
P07259	Protein URA2;Glutamine-dependent carbamoyl-phosphate synthase;Aspartate carbamoyltransferase	URA2	sp|P07259|PYR1_YEAST Protein URA2 OS=Saccharomyces cerevisiae (strain ATCC 204508 / S288c) GN=URA2 PE=1 SV=5	1	12	6.1	245.04	2214	0	73.413	728240000	0	0	0	2615500	1900400	1998200	0	0	0	0	0	0	0	0	25192000	15031000	9591700	8671300	20241000	17622000	14555000	1297600	2729200	10905000	3259500	28336000	183630000	35365000	103670000	193830000	5151200	16578000	3988000	1597000	1492400	0	4867900	2315800
Q04675	tRNA-splicing endonuclease subunit SEN15	SEN15	sp|Q04675|SEN15_YEAST tRNA-splicing endonuclease subunit SEN15 OS=Saccharomyces cerevisiae (strain ATCC 204508 / S288c) GN=SEN15 PE=1 SV=2	1	2	18.8	14.89	128	0	7.7573	29913000	0	0	0	0	0	1384600	0	0	0	0	0	0	0	0	10614000	0	0	0	0	0	0	0	0	0	0	0	1442700	0	0	0	1209000	0	0	0	1438300	0	0	12730000
Q07799	Uncharacterized protein YLL007C		sp|Q07799|YL007_YEAST Uncharacterized protein YLL007C OS=Saccharomyces cerevisiae (strain ATCC 204508 / S288c) GN=YLL007C PE=1 SV=1	1	14	20	76.621	665	0	84.517	487490000	0	2061800	319150	0	0	0	0	1900300	2221000	0	642270	0	0	0	966870	0	8195600	0	0	0	252090000	11579000	21448000	2634300	119040000	12540000	0	10691000	2855200	0	8631200	10604000	8384000	0	1426100	0	9266900	0
O13563	26S proteasome regulatory subunit RPN13	RPN13	sp|O13563|RPN13_YEAST 26S proteasome regulatory subunit RPN13 OS=Saccharomyces cerevisiae (strain ATCC 204508 / S288c) GN=RPN13 PE=1 SV=1	1	3	20.5	17.902	156	0	68.231	235190000	15227000	0	0	0	0	0	0	0	0	0	0	0	0	0	0	0	0	0	0	0	0	0	0	0	0	0	0	0	0	0	0	0	0	0	1399400	0	196940000	1357100
P49435	Adenine phosphoribosyltransferase 1	APT1	sp|P49435|APT1_YEAST Adenine phosphoribosyltransferase 1 OS=Saccharomyces cerevisiae (strain ATCC 204508 / S288c) GN=APT1 PE=1 SV=3	1	6	33.2	20.587	187	0	85.13	506970000	0	0	0	9980100	0	0	5273700	0	0	0	0	0	4048600	0	0	0	0	0	0	0	0	0	0	0	0	0	0	2140000	0	2880700	0	0	0	0	1383900	451410000	26778000	0
Q02950	37S ribosomal protein MRP51, mitochondrial	MRP51	sp|Q02950|RT51_YEAST 37S ribosomal protein MRP51, mitochondrial OS=Saccharomyces cerevisiae (strain ATCC 204508 / S288c) GN=MRP51 PE=1 SV=1	1	13	44.2	39.445	344	0	105.95	861690000	0	0	0	0	0	0	0	0	0	0	0	0	0	0	0	0	0	0	0	0	0	0	0	3088700	2353800	4628500	838260000	2646700	467440	508930	0	0	0	2955300	1382400	0	0	0
P43616	Cys-Gly metallodipeptidase DUG1	DUG1	sp|P43616|DUG1_YEAST Cys-Gly metallodipeptidase DUG1 OS=Saccharomyces cerevisiae (strain ATCC 204508 / S288c) GN=DUG1 PE=1 SV=1	1	7	19.8	52.871	481	0	86.028	107210000	0	0	0	0	0	0	0	0	0	0	0	0	0	0	0	0	0	0	0	0	0	0	0	0	97270000	0	0	0	893270	0	1638300	0	2993800	0	1374200	0	3044700	0
Q05506	Arginine--tRNA ligase, cytoplasmic		sp|Q05506|SYRC_YEAST Arginine--tRNA ligase, cytoplasmic OS=Saccharomyces cerevisiae (strain ATCC 204508 / S288c) GN=YDR341C PE=1 SV=1	1	3	4.4	69.524	607	0	3.9387	42711000	0	0	0	0	0	13140000	0	0	0	0	0	0	0	0	0	0	0	0	0	0	0	19118000	7251200	0	682310	0	0	0	0	1158800	0	0	0	0	1361300	0	0	0
P33322	H/ACA ribonucleoprotein complex subunit 4	CBF5	sp|P33322|CBF5_YEAST H/ACA ribonucleoprotein complex subunit 4 OS=Saccharomyces cerevisiae (strain ATCC 204508 / S288c) GN=CBF5 PE=1 SV=1	1	9	23.8	54.704	483	0	25.826	294480000	0	0	0	20823000	26820000	7579100	1373500	2203600	604910	0	0	0	0	0	29982000	5265300	2759900	1232700	2106700	0	2799100	1746600	11958000	0	5070900	69864000	74712000	20824000	1793200	1998700	0	0	0	1607400	1359000	0	0	0
P54839	Hydroxymethylglutaryl-CoA synthase	ERG13	sp|P54839|HMCS_YEAST Hydroxymethylglutaryl-CoA synthase OS=Saccharomyces cerevisiae (strain ATCC 204508 / S288c) GN=ERG13 PE=1 SV=1	1	2	5.5	55.013	491	0.0020027	2.3824	34786000	0	0	0	0	0	0	1411600	0	0	0	0	0	0	0	0	0	0	0	0	0	0	0	0	0	4374100	0	0	0	0	12900000	4370200	3550400	2834000	0	1356000	0	3989600	0
P39729	Ribosome-interacting GTPase 1	RBG1	sp|P39729|RBG1_YEAST Ribosome-interacting GTPase 1 OS=Saccharomyces cerevisiae (strain ATCC 204508 / S288c) GN=RBG1 PE=1 SV=1	1	5	16.3	40.701	369	0	39.127	75924000	0	0	0	0	0	990780	0	860420	0	0	0	0	0	0	0	0	0	0	0	0	0	0	0	0	0	3016200	1915500	0	1201600	0	61367000	5227600	0	0	1344800	0	0	0
P49573	Copper transport protein CTR1	CTR1	sp|P49573|CTR1_YEAST Copper transport protein CTR1 OS=Saccharomyces cerevisiae (strain ATCC 204508 / S288c) GN=CTR1 PE=1 SV=1	1	5	14.3	44.441	406	0	279.46	480760000	0	0	0	99399000	0	0	0	0	0	0	0	0	195240	0	135010000	131800000	12444000	7336300	3753200	1750900	0	0	0	6329900	1694100	7018600	5815200	0	2427500	4488700	0	0	33043000	14107000	1335500	0	11067000	946820
P07213	Mitochondrial import receptor subunit TOM70	TOM70	sp|P07213|TOM70_YEAST Mitochondrial import receptor subunit TOM70 OS=Saccharomyces cerevisiae (strain ATCC 204508 / S288c) GN=TOM70 PE=1 SV=2	1	8	15.7	70.122	617	0	141.97	162090000	0	0	0	0	55968000	0	895170	2502700	0	0	0	0	0	0	0	1047500	0	888620	42113000	3930700	10517000	4298900	12093000	0	6435500	5339300	1562300	686460	994240	1334400	0	0	0	0	1330800	0	0	3465000
P38821	Aspartyl aminopeptidase 4	APE4	sp|P38821|DNPEP_YEAST Aspartyl aminopeptidase 4 OS=Saccharomyces cerevisiae (strain ATCC 204508 / S288c) GN=APE4 PE=1 SV=1	1	4	11.8	54.173	490	0	11.688	174930000	0	0	0	0	0	0	0	0	0	0	0	0	0	0	0	0	0	0	0	0	0	0	0	0	149640000	0	19243000	0	0	4729200	0	0	0	0	1310000	0	0	0
Q05567	Sphingosine-1-phosphate lyase	DPL1	sp|Q05567|SGPL_YEAST Sphingosine-1-phosphate lyase OS=Saccharomyces cerevisiae (strain ATCC 204508 / S288c) GN=DPL1 PE=1 SV=1	1	11	23.8	65.565	589	0	95.18	294500000	0	0	0	2179900	0	0	0	0	704970	0	0	0	0	0	0	0	0	1220100	14470000	0	0	201730000	28852000	0	0	6032900	11651000	3978300	5023000	0	0	2042700	0	4159100	1236600	1593200	9629200	0
P42940	Probable electron transfer flavoprotein subunit beta	CIR1	sp|P42940|ETFB_YEAST Probable electron transfer flavoprotein subunit beta OS=Saccharomyces cerevisiae (strain ATCC 204508 / S288c) GN=CIR1 PE=1 SV=1	1	6	25.7	28.758	261	0	75.084	262240000	0	0	945300	0	0	0	0	0	0	0	0	1791200	6429000	0	0	0	0	0	927100	0	0	0	0	0	0	8994500	11733000	6210200	9161300	0	157060000	10896000	0	0	1219800	37410000	0	0
P42936	Putative elongation factor 1 gamma homolog		sp|P42936|YG4D_YEAST Putative elongation factor 1 gamma homolog OS=Saccharomyces cerevisiae (strain ATCC 204508 / S288c) GN=YGR201C PE=4 SV=3	1	3	14.7	26.297	225	0	52.776	40467000	0	0	0	0	0	960190	0	0	0	0	0	0	0	0	0	0	0	0	0	0	1824600	0	0	0	0	0	0	0	0	0	0	0	5940900	29386000	1210700	1145200	0	0
P32771	S-(hydroxymethyl)glutathione dehydrogenase	SFA1	sp|P32771|FADH_YEAST S-(hydroxymethyl)glutathione dehydrogenase OS=Saccharomyces cerevisiae (strain ATCC 204508 / S288c) GN=SFA1 PE=1 SV=1	1	3	8.5	41.042	386	0	69.635	143090000	0	0	0	0	0	0	0	1838200	0	0	0	0	353000	800490	4784100	0	0	0	0	0	0	0	0	0	0	74196000	41068000	3010100	0	0	1006300	4881300	2289700	0	1172200	0	3202000	899600
P53829	Protein CAF40	CAF40	sp|P53829|CAF40_YEAST Protein CAF40 OS=Saccharomyces cerevisiae (strain ATCC 204508 / S288c) GN=CAF40 PE=1 SV=1	1	4	11.3	41.155	373	0	8.3128	53685000	0	0	0	0	0	0	0	0	0	0	0	0	0	0	0	0	0	0	0	0	0	1665900	0	0	0	0	36748000	3393200	3779600	1774500	0	0	4163100	1050100	1110400	0	0	0
P38759	Vacuolar protein sorting-associated protein 29	VPS29	sp|P38759|VPS29_YEAST Vacuolar protein sorting-associated protein 29 OS=Saccharomyces cerevisiae (strain ATCC 204508 / S288c) GN=VPS29 PE=1 SV=1	1	4	17.7	31.012	282	0	96.769	199510000	0	0	0	0	0	0	0	0	0	0	0	0	0	0	0	0	0	0	0	0	0	0	0	0	0	7525600	145210000	21118000	7368000	1881600	1464800	1112600	828820	841090	1052200	8108500	1623900	0
P51996	GTP-binding protein YPT32/YPT11	YPT32	sp|P51996|YPT32_YEAST GTP-binding protein YPT32/YPT11 OS=Saccharomyces cerevisiae (strain ATCC 204508 / S288c) GN=YPT32 PE=1 SV=3	1	10	49.1	24.52	222	0	26.412	85410000	0	0	0	0	0	0	0	0	0	0	0	1054600	0	0	0	0	0	0	0	0	14175000	0	0	0	8751100	0	0	0	0	0	0	0	5598800	53304000	1028500	0	1497900	0
P53892	Protein IBD2	IBD2	sp|P53892|IBD2_YEAST Protein IBD2 OS=Saccharomyces cerevisiae (strain ATCC 204508 / S288c) GN=IBD2 PE=1 SV=1	1	3	9.4	40.016	351	0	17.082	54138000	0	0	0	0	0	27076000	13693000	0	0	0	0	0	0	0	0	0	0	0	0	264040	0	0	0	0	0	359920	7073000	0	1443900	0	0	1623500	1583000	0	1021300	0	0	0
Q01976	ADP-ribose pyrophosphatase	YSA1	sp|Q01976|ADPP_YEAST ADP-ribose pyrophosphatase OS=Saccharomyces cerevisiae (strain ATCC 204508 / S288c) GN=YSA1 PE=1 SV=2	1	1	6.5	26.087	231	0	21.142	9536700	0	0	0	0	0	0	0	0	0	0	0	0	0	0	0	0	0	0	0	0	0	0	0	0	0	0	0	0	0	0	0	0	8526300	0	1010400	0	0	0
Q04081	Leucine carboxyl methyltransferase 1	PPM1	sp|Q04081|LCMT1_YEAST Leucine carboxyl methyltransferase 1 OS=Saccharomyces cerevisiae (strain ATCC 204508 / S288c) GN=PPM1 PE=1 SV=1	1	7	22.6	37.694	328	0	75.656	345910000	694930	493400	0	0	0	0	0	0	2246900	0	0	0	0	989120	0	2352000	0	0	0	330510	0	0	0	0	1001900	0	6675300	140060000	176380000	9050000	0	0	4656300	0	984140	0	0	0
P53742	Nucleolar GTP-binding protein 2	NOG2	sp|P53742|NOG2_YEAST Nucleolar GTP-binding protein 2 OS=Saccharomyces cerevisiae (strain ATCC 204508 / S288c) GN=NOG2 PE=1 SV=1	1	21	45.1	55.488	486	0	304.21	1092400000	0	902880	0	0	0	8066100	0	0	1308100	0	0	0	0	0	2386800	879920	0	0	0	1491600	4028100	3601100	5304900	736750000	34927000	45399000	99729000	14255000	49800000	9867100	12395000	11715000	0	6661000	970440	6389700	8968600	25415000
Q01477	Ubiquitin carboxyl-terminal hydrolase 3	UBP3	sp|Q01477|UBP3_YEAST Ubiquitin carboxyl-terminal hydrolase 3 OS=Saccharomyces cerevisiae (strain ATCC 204508 / S288c) GN=UBP3 PE=1 SV=1	1	4	4.6	101.92	912	0	17.295	84816000	0	0	0	0	0	0	0	483760	0	0	0	0	0	0	4690500	8431000	0	2016100	4258400	3059300	825940	6751800	4442900	33238000	917230	9761000	0	829440	0	1144100	1119100	1009700	0	879030	959190	0	0	0
P23254	Transketolase 1	TKL1	sp|P23254|TKT1_YEAST Transketolase 1 OS=Saccharomyces cerevisiae (strain ATCC 204508 / S288c) GN=TKL1 PE=1 SV=4	1	2	3.5	73.805	680	0	3.964	12046000	0	0	0	0	3773500	0	0	0	0	0	0	0	0	0	510270	0	0	0	660620	0	0	674990	1168300	0	718390	0	0	0	1087600	914810	463720	0	0	0	923350	423270	0	0
P25555	Single-strand telomeric DNA-binding protein GBP2	GBP2	sp|P25555|GBP2_YEAST Single-strand telomeric DNA-binding protein GBP2 OS=Saccharomyces cerevisiae (strain ATCC 204508 / S288c) GN=GBP2 PE=1 SV=1	1	6	16.6	48.728	427	0	31.304	228140000	0	0	0	4817700	0	0	0	0	0	0	0	0	0	0	0	4257100	0	0	0	0	0	0	0	0	117830000	13433000	38941000	16956000	0	12901000	0	0	0	0	919320	0	2047300	3650800
P32496	26S proteasome regulatory subunit RPN12	RPN12	sp|P32496|RPN12_YEAST 26S proteasome regulatory subunit RPN12 OS=Saccharomyces cerevisiae (strain ATCC 204508 / S288c) GN=RPN12 PE=1 SV=3	1	9	36.9	31.919	274	0	89.428	306130000	0	1458800	0	5958300	0	0	0	0	0	0	0	0	0	0	0	0	0	0	0	0	0	665670	0	0	0	0	36917000	940150	0	0	250410000	0	0	0	888140	3549500	5342100	0
P47160	Epsin-3	ENT3	sp|P47160|ENT3_YEAST Epsin-3 OS=Saccharomyces cerevisiae (strain ATCC 204508 / S288c) GN=ENT3 PE=1 SV=1	1	2	5.1	45.091	408	0	3.1752	16471000	0	0	0	0	0	0	0	0	0	0	0	0	0	0	0	0	0	0	0	0	0	0	0	0	496780	0	652810	0	0	0	734970	0	814080	621930	852060	1938000	7753200	836910
Q02554	Cold sensitive U2 snRNA suppressor 1	CUS1	sp|Q02554|CUS1_YEAST Cold sensitive U2 snRNA suppressor 1 OS=Saccharomyces cerevisiae (strain ATCC 204508 / S288c) GN=CUS1 PE=1 SV=1	1	7	17	50.252	436	0	55.644	157880000	0	0	0	0	0	0	0	0	0	0	0	1146800	0	1908600	1481700	0	0	0	0	0	0	0	3019400	124540000	5284200	0	0	0	0	2806900	0	8941600	0	4795000	850280	1394100	0	1718900
Q12343	Mediator of RNA polymerase II transcription subunit 4	MED4	sp|Q12343|MED4_YEAST Mediator of RNA polymerase II transcription subunit 4 OS=Saccharomyces cerevisiae (strain ATCC 204508 / S288c) GN=MED4 PE=1 SV=1	1	2	7.7	32.205	284	0	3.2152	12380000	0	0	0	0	0	0	634000	0	0	0	0	0	0	0	0	0	0	0	0	0	0	0	0	0	0	0	0	0	9070000	0	0	736760	0	0	827690	0	1111500	0
Q12046	Pre-mRNA-splicing factor CWC2	CWC2	sp|Q12046|CWC2_YEAST Pre-mRNA-splicing factor CWC2 OS=Saccharomyces cerevisiae (strain ATCC 204508 / S288c) GN=CWC2 PE=1 SV=1	1	3	10.3	38.43	339	0	9.4523	92193000	0	0	0	0	0	0	0	1421000	0	0	0	0	0	0	0	0	0	0	0	0	0	0	0	0	0	28609000	51700000	2129300	1509800	0	655260	3501000	0	1841800	826450	0	0	0
P08518	DNA-directed RNA polymerase II subunit RPB2	RPB2	sp|P08518|RPB2_YEAST DNA-directed RNA polymerase II subunit RPB2 OS=Saccharomyces cerevisiae (strain ATCC 204508 / S288c) GN=RPB2 PE=1 SV=2	1	3	2.2	138.75	1224	0	5.2232	120300000	0	0	0	2161400	0	0	0	0	262720	0	0	409270	0	0	8116800	16683000	1713800	4515200	8734400	4380400	30495000	3552000	0	2685100	3747500	4584000	2684100	5399400	4924800	4448500	2210900	2747100	0	0	808510	1451400	1601600	0
P38689	Ribose-phosphate pyrophosphokinase 3	PRS3	sp|P38689|KPR3_YEAST Ribose-phosphate pyrophosphokinase 3 OS=Saccharomyces cerevisiae (strain ATCC 204508 / S288c) GN=PRS3 PE=1 SV=1	1	9	25.3	35.123	320	0	111.73	438630000	0	0	0	0	0	0	0	0	8333400	0	0	0	0	0	0	0	0	0	0	0	0	8079500	0	4252100	799300	7063400	9912100	1430600	108900000	273500000	2589100	2394700	2676500	1276100	780010	0	1064300	1451600
P16474	78 kDa glucose-regulated protein homolog	KAR2	sp|P16474|GRP78_YEAST 78 kDa glucose-regulated protein homolog OS=Saccharomyces cerevisiae (strain ATCC 204508 / S288c) GN=KAR2 PE=1 SV=1	1	5	8.4	74.467	682	0	4.2405	58825000	0	0	0	0	2432700	0	0	0	0	0	0	0	0	0	294220	0	0	0	0	0	1498500	4123100	8788500	0	0	14547000	16691000	0	799440	3114700	0	0	0	2181600	755870	3597400	0	0
P54861	Dynamin-related protein DNM1	DNM1	sp|P54861|DNM1_YEAST Dynamin-related protein DNM1 OS=Saccharomyces cerevisiae (strain ATCC 204508 / S288c) GN=DNM1 PE=1 SV=1	1	1	1.3	84.971	757	0.0051086	1.9201	12865000	0	0	0	0	0	0	0	0	0	0	0	0	0	0	0	0	0	0	0	0	0	0	0	0	0	0	0	0	0	0	0	0	0	0	738350	0	0	0
P38789	Ribosome biogenesis protein SSF1	SSF1	sp|P38789|SSF1_YEAST Ribosome biogenesis protein SSF1 OS=Saccharomyces cerevisiae (strain ATCC 204508 / S288c) GN=SSF1 PE=1 SV=1	1	5	11.3	51.763	453	0	36.722	138740000	0	0	0	0	0	0	0	0	0	0	0	0	0	0	0	0	1586600	0	0	0	3880500	0	0	114320000	0	0	0	14527000	0	0	0	1761200	1069500	919260	676300	0	0	0
Q02201;P38755	Oxysterol-binding protein homolog 6	OSH6	sp|Q02201|OSH6_YEAST Oxysterol-binding protein homolog 6 OS=Saccharomyces cerevisiae (strain ATCC 204508 / S288c) GN=OSH6 PE=1 SV=1	2	6	15.4	51.587	448	0	85.656	120480000	0	0	0	0	0	563950	0	0	0	0	12777000	0	0	0	0	0	0	924230	0	0	883910	3684900	0	0	76593000	2752400	3505800	3727600	8978800	1411800	0	252260	0	347630	670140	2620700	0	0
P04840	Mitochondrial outer membrane protein porin 1	POR1	sp|P04840|VDAC1_YEAST Mitochondrial outer membrane protein porin 1 OS=Saccharomyces cerevisiae (strain ATCC 204508 / S288c) GN=POR1 PE=1 SV=4	1	10	38.2	30.428	283	0	155.26	753540000	8705700	46759000	0	14392000	0	10992000	0	0	4061500	0	0	0	0	0	19322000	10407000	21615000	9254800	4803300	4713600	0	6218500	0	0	0	0	13376000	5870700	0	2090900	523590000	3346700	2566300	11509000	625390	8687600	19126000	1503000
P46963	CTD kinase subunit gamma	CTK3	sp|P46963|CTK3_YEAST CTD kinase subunit gamma OS=Saccharomyces cerevisiae (strain ATCC 204508 / S288c) GN=CTK3 PE=1 SV=2	1	4	13.9	34.809	296	0	29.83	113270000	0	0	0	0	0	0	0	0	16084000	0	0	0	0	0	0	0	0	0	0	0	0	0	0	0	0	0	0	0	57777000	32152000	0	1390100	0	340360	584840	0	2212400	0
P32910	DNA-directed RNA polymerase III subunit RPC6	RPC34	sp|P32910|RPC6_YEAST DNA-directed RNA polymerase III subunit RPC6 OS=Saccharomyces cerevisiae (strain ATCC 204508 / S288c) GN=RPC34 PE=1 SV=1	1	3	10.7	36.135	317	0	41.986	195890000	0	0	0	0	4215100	1813700	65164000	0	32857000	0	0	0	0	0	5736000	0	0	292270	0	0	0	0	0	0	0	0	0	6701800	68729000	8468500	0	0	1338700	0	573260	0	0	0
P39940	E3 ubiquitin-protein ligase RSP5	RSP5	sp|P39940|RSP5_YEAST E3 ubiquitin-protein ligase RSP5 OS=Saccharomyces cerevisiae (strain ATCC 204508 / S288c) GN=RSP5 PE=1 SV=1	1	21	35.2	91.815	809	0	233.58	702020000	1111900	634720	0	349070000	1881900	1225700	0	589060	24794000	0	0	0	0	3502200	8960800	1188300	2071800	1830300	3009900	0	54482000	0	17927000	8646300	0	15269000	23850000	32202000	95418000	982310	4216200	5146800	0	0	555900	16073000	0	2448600
Q03976	37S ribosomal protein S24, mitochondrial	RSM24	sp|Q03976|RT24_YEAST 37S ribosomal protein S24, mitochondrial OS=Saccharomyces cerevisiae (strain ATCC 204508 / S288c) GN=RSM24 PE=1 SV=1	1	10	34.2	37.393	319	0	49.252	476280000	0	0	27814000	1253100	0	0	0	0	0	0	0	0	0	0	1703700	0	1592400	0	0	0	0	0	7580000	0	0	0	11969000	136210000	213680000	43560000	0	0	0	0	539710	3683000	0	0
Q06705	Phosphatidylinositol transfer protein CSR1	CSR1	sp|Q06705|CSR1_YEAST Phosphatidylinositol transfer protein CSR1 OS=Saccharomyces cerevisiae (strain ATCC 204508 / S288c) GN=CSR1 PE=1 SV=1	1	7	20.3	47.462	408	0	79.602	155250000	0	0	0	0	0	119830000	0	0	0	0	0	0	0	0	0	0	0	0	0	0	0	0	0	0	0	1417300	21678000	2252300	726920	4495200	0	1272000	2286000	832340	452280	0	0	0
Q07879	Ubiquitin-like-conjugating enzyme ATG10	ATG10	sp|Q07879|ATG10_YEAST Ubiquitin-like-conjugating enzyme ATG10 OS=Saccharomyces cerevisiae (strain ATCC 204508 / S288c) GN=ATG10 PE=1 SV=1	1	1	6	19.759	167	0	9.5922	54044000	0	0	0	0	0	0	0	0	0	0	0	0	0	0	41920000	0	1597000	0	875920	422500	0	0	0	0	0	0	0	0	0	0	0	0	0	0	432860	0	8795600	0
P25638	TPR repeat-containing protein associated with Hsp90	TAH1	sp|P25638|TAH1_YEAST TPR repeat-containing protein associated with Hsp90 OS=Saccharomyces cerevisiae (strain ATCC 204508 / S288c) GN=TAH1 PE=1 SV=1	1	1	9.9	12.511	111	0.0026438	2.2931	33502000	0	0	0	0	0	0	0	0	0	0	0	0	0	0	0	0	0	0	0	0	0	0	0	0	0	0	0	0	0	0	0	0	0	0	383860	0	0	0
Q12123	Inactive diphosphatase DCS2	DCS2	sp|Q12123|DCS2_YEAST Inactive diphosphatase DCS2 OS=Saccharomyces cerevisiae (strain ATCC 204508 / S288c) GN=DCS2 PE=1 SV=3	1	9	29.7	40.94	353	0	87.193	286340000	0	0	0	0	0	0	0	0	644750	0	0	0	0	0	0	1310500	7197300	0	0	0	0	0	0	4112500	0	251320000	7960900	0	5768000	2107600	5181700	0	0	0	258730	0	0	0
Q12055	Adenylate kinase isoenzyme 6 homolog FAP7	FAP7	sp|Q12055|KAD6_YEAST Adenylate kinase isoenzyme 6 homolog FAP7 OS=Saccharomyces cerevisiae (strain ATCC 204508 / S288c) GN=FAP7 PE=1 SV=1	1	7	49.2	22.723	197	0	73.707	507400000	0	0	541960	0	0	29469000	0	0	0	0	5062200	0	0	0	0	0	0	0	0	0	0	0	0	0	643200	0	6528900	0	0	0	0	0	136980000	297880000	0	744470	7739800	16007000
Q06524	Protein SUE1, mitochondrial	SUE1	sp|Q06524|SUE1_YEAST Protein SUE1, mitochondrial OS=Saccharomyces cerevisiae (strain ATCC 204508 / S288c) GN=SUE1 PE=4 SV=1	1	6	30.1	24.305	206	0	50.49	333810000	0	0	0	0	0	0	0	0	0	0	0	0	0	0	0	0	0	0	0	0	0	0	0	0	0	0	0	0	0	0	0	0	27208000	267180000	0	34630000	4794000	0
P40582	Glutathione S-transferase 1	GTT1	sp|P40582|GST1_YEAST Glutathione S-transferase 1 OS=Saccharomyces cerevisiae (strain ATCC 204508 / S288c) GN=GTT1 PE=1 SV=1	1	6	29.5	26.794	234	0	39.013	483560000	0	0	0	0	0	7295700	6071000	0	0	0	1533600	0	0	0	0	0	0	0	12177000	0	5051700	0	9743000	1579300	4585200	0	0	0	2574000	0	0	0	242650000	171310000	0	10373000	3878500	0
Q06991	Protein PUN1	PUN1	sp|Q06991|PUN1_YEAST Protein PUN1 OS=Saccharomyces cerevisiae (strain ATCC 204508 / S288c) GN=PUN1 PE=1 SV=1	1	4	14.8	29.251	263	0	20.828	302080000	0	0	0	0	0	0	2179800	0	0	0	0	0	0	0	33830000	16939000	0	0	0	518990	0	0	12210000	0	0	0	0	0	0	3563600	0	2423600	65892000	164530000	0	0	0	0
P40555	Probable 26S proteasome regulatory subunit p27	NAS2	sp|P40555|PSMD9_YEAST Probable 26S proteasome regulatory subunit p27 OS=Saccharomyces cerevisiae (strain ATCC 204508 / S288c) GN=NAS2 PE=1 SV=1	1	7	33.2	24.846	220	0	64.86	124440000	0	0	0	0	0	0	0	0	0	0	0	0	0	0	0	1545000	0	0	0	0	0	0	0	3461100	1723500	0	0	0	0	0	0	0	6644700	111070000	0	0	0	0
P25631	Ankyrin repeat-containing protein YCR051W		sp|P25631|YCU1_YEAST Ankyrin repeat-containing protein YCR051W OS=Saccharomyces cerevisiae (strain ATCC 204508 / S288c) GN=YCR051W PE=1 SV=1	1	6	38.7	24.694	222	0	315.09	138590000	0	0	0	0	0	0	0	0	0	0	0	0	0	0	0	0	0	0	0	0	0	0	0	0	0	0	0	0	0	0	0	0	28445000	110150000	0	0	0	0
Q99260	GTP-binding protein YPT6	YPT6	sp|Q99260|YPT6_YEAST GTP-binding protein YPT6 OS=Saccharomyces cerevisiae (strain ATCC 204508 / S288c) GN=YPT6 PE=1 SV=1	1	3	13.5	24.412	215	0	4.2307	121900000	0	0	0	0	0	0	0	0	0	0	0	0	0	0	0	0	0	0	0	0	0	0	0	0	0	0	0	0	0	0	0	0	19292000	80619000	0	0	9808700	4661300
P47058	tRNA-specific adenosine deaminase subunit TAD2	TAD2	sp|P47058|TAD2_YEAST tRNA-specific adenosine deaminase subunit TAD2 OS=Saccharomyces cerevisiae (strain ATCC 204508 / S288c) GN=TAD2 PE=1 SV=1	1	4	18.4	28.252	250	0	54.914	154450000	0	0	0	47902000	1149200	2154500	0	2308200	0	0	0	0	0	0	0	0	0	0	0	0	2622300	0	0	0	0	0	0	0	7050500	3335400	0	0	21104000	65286000	0	1157700	0	0
P21734	Ubiquitin-conjugating enzyme E2 1	UBC1	sp|P21734|UBC1_YEAST Ubiquitin-conjugating enzyme E2 1 OS=Saccharomyces cerevisiae (strain ATCC 204508 / S288c) GN=UBC1 PE=1 SV=1	1	5	23.7	24.178	215	0	8.881	113150000	0	0	0	0	0	0	0	0	0	0	1784100	0	0	0	0	0	0	0	0	0	0	0	0	0	0	0	0	851390	0	0	0	0	18929000	57998000	0	0	19446000	4598700
P28241	Isocitrate dehydrogenase [NAD] subunit 2, mitochondrial	IDH2	sp|P28241|IDH2_YEAST Isocitrate dehydrogenase [NAD] subunit 2, mitochondrial OS=Saccharomyces cerevisiae (strain ATCC 204508 / S288c) GN=IDH2 PE=1 SV=1	1	9	32.2	39.739	369	0	210.28	787330000	1409200	0	0	0	0	0	6091300	6022500	0	0	0	0	0	0	2344200	0	0	0	0	1059400	0	0	1311100	0	0	0	283940000	349880000	8718500	6726800	18846000	6236600	26279000	57402000	0	0	0	4030700
P07170	Adenylate kinase	ADK1	sp|P07170|KAD2_YEAST Adenylate kinase OS=Saccharomyces cerevisiae (strain ATCC 204508 / S288c) GN=ADK1 PE=1 SV=2	1	4	19.8	24.254	222	0	41.316	103580000	0	0	0	0	0	0	0	0	0	0	0	505330	0	0	0	0	0	0	0	0	0	2888600	2748400	3855700	0	0	0	711440	0	0	0	0	20108000	52789000	0	6835500	12332000	800480
P41734	Isoamyl acetate-hydrolyzing esterase	IAH1	sp|P41734|IAH1_YEAST Isoamyl acetate-hydrolyzing esterase OS=Saccharomyces cerevisiae (strain ATCC 204508 / S288c) GN=IAH1 PE=1 SV=1	1	3	14.7	27.346	238	0	7.0545	53565000	0	0	0	0	0	0	0	0	0	0	0	0	0	0	0	0	0	0	0	0	0	0	0	0	0	0	0	0	0	0	0	0	6104700	47460000	0	0	0	0
Q12030	Transcription initiation factor TFIID subunit 10	TAF10	sp|Q12030|TAF10_YEAST Transcription initiation factor TFIID subunit 10 OS=Saccharomyces cerevisiae (strain ATCC 204508 / S288c) GN=TAF10 PE=1 SV=1	1	4	23.3	23.019	206	0	160.33	50158000	0	0	0	0	0	0	0	0	0	0	471280	0	0	0	0	0	0	0	0	0	0	0	0	0	0	0	0	0	0	0	0	0	5859600	41785000	0	0	2042100	0
P38523	GrpE protein homolog, mitochondrial	MGE1	sp|P38523|GRPE_YEAST GrpE protein homolog, mitochondrial OS=Saccharomyces cerevisiae (strain ATCC 204508 / S288c) GN=MGE1 PE=1 SV=1	1	3	16.2	26.066	228	0	9.4011	47515000	0	0	0	0	0	0	7029700	0	0	0	0	0	0	0	0	0	0	0	0	0	0	0	0	0	0	0	0	0	0	0	0	0	0	40074000	0	411130	0	0
Q08285	Exosome complex component RRP40	RRP40	sp|Q08285|RRP40_YEAST Exosome complex component RRP40 OS=Saccharomyces cerevisiae (strain ATCC 204508 / S288c) GN=RRP40 PE=1 SV=2	1	4	24.2	26.556	240	0	68.224	160330000	1690500	1901900	1448400	0	0	0	0	0	0	0	9283300	0	0	0	1027700	0	0	0	0	0	0	0	3330400	0	0	0	0	0	0	0	0	0	108070000	33584000	0	0	0	0
P18496	Mitochondrial ATPase complex subunit ATP10	ATP10	sp|P18496|ATP10_YEAST Mitochondrial ATPase complex subunit ATP10 OS=Saccharomyces cerevisiae (strain ATCC 204508 / S288c) GN=ATP10 PE=1 SV=2	1	2	7.2	32.094	279	0.001996	2.3364	66960000	0	0	0	0	0	0	0	0	0	0	25895000	2220100	0	0	0	0	0	0	0	0	0	0	0	0	0	0	0	0	0	0	9148000	0	0	29697000	0	0	0	0
P32501	Translation initiation factor eIF-2B subunit epsilon	GCD6	sp|P32501|EI2BE_YEAST Translation initiation factor eIF-2B subunit epsilon OS=Saccharomyces cerevisiae (strain ATCC 204508 / S288c) GN=GCD6 PE=1 SV=1	1	13	20.2	81.16	712	0	107.08	661560000	0	834750	0	0	3746400	0	0	0	0	0	0	0	0	0	0	0	0	4576500	281830000	66603000	20792000	14401000	4146900	12822000	13640000	3402300	2577300	2570300	14505000	25921000	0	8548200	2383900	27519000	0	45024000	35802000	35389000
P38771	Ribosome-recycling factor, mitochondrial	RRF1	sp|P38771|RRF1_YEAST Ribosome-recycling factor, mitochondrial OS=Saccharomyces cerevisiae (strain ATCC 204508 / S288c) GN=RRF1 PE=1 SV=1	1	4	13	26.406	230	0	8.1618	47362000	0	0	0	0	0	0	0	0	0	0	0	6815100	0	0	0	0	0	0	645390	0	0	0	0	0	13249000	0	0	0	0	0	0	0	2972900	23679000	0	0	0	0
P47089	Translation machinery-associated protein 22	TMA22	sp|P47089|DENR_YEAST Translation machinery-associated protein 22 OS=Saccharomyces cerevisiae (strain ATCC 204508 / S288c) GN=TMA22 PE=1 SV=1	1	2	11.6	22.495	198	0	6.2793	93120000	0	0	0	0	0	0	0	0	0	0	0	0	0	0	0	0	0	0	0	0	0	23437000	0	0	0	0	30774000	0	2846400	3212300	0	0	12957000	18424000	0	0	1469000	0
Q12272	tRNA 2-phosphotransferase	TPT1	sp|Q12272|TPT1_YEAST tRNA 2-phosphotransferase OS=Saccharomyces cerevisiae (strain ATCC 204508 / S288c) GN=TPT1 PE=1 SV=1	1	2	10.9	26.196	230	0	7.5057	51058000	0	0	0	0	0	0	0	0	0	0	0	0	0	0	0	0	0	0	0	0	0	0	0	0	0	0	0	0	0	0	0	0	34292000	16766000	0	0	0	0
P54780	60S ribosomal protein L15-B	RPL15B	sp|P54780|RL15B_YEAST 60S ribosomal protein L15-B OS=Saccharomyces cerevisiae (strain ATCC 204508 / S288c) GN=RPL15B PE=1 SV=2	1	8	31.9	24.422	204	0.00068027	2.6347	347280000	0	0	0	0	0	0	0	0	0	0	14419000	0	0	0	0	0	0	0	0	0	0	0	0	0	0	0	0	0	0	0	0	0	309160000	16376000	0	0	7315900	0
Q04636	FACT complex subunit POB3	POB3	sp|Q04636|POB3_YEAST FACT complex subunit POB3 OS=Saccharomyces cerevisiae (strain ATCC 204508 / S288c) GN=POB3 PE=1 SV=1	1	22	39.9	62.993	552	0	323.31	1248100000	0	0	0	0	0	7469200	727350	5169700	0	0	0	0	0	0	2900700	1718900	2810600	0	0	1003300	938390000	14737000	28783000	2366400	3307100	33862000	6345100	39786000	8484700	8885400	32794000	45180000	20324000	15124000	0	1892800	4466800	7080600
P24276	Protein SSD1	SSD1	sp|P24276|SSD1_YEAST Protein SSD1 OS=Saccharomyces cerevisiae (strain ATCC 204508 / S288c) GN=SSD1 PE=1 SV=1	1	4	3.3	139.95	1250	0	4.2421	195050000	0	0	0	0	0	1988900	0	0	0	0	0	0	0	0	0	0	11436000	2504500	910340	0	0	0	0	0	0	0	0	0	0	0	2396800	2449600	0	15029000	0	0	123120000	13178000
Q04432	Glutathione-independent glyoxalase HSP31	HSP31	sp|Q04432|HSP31_YEAST Glutathione-independent glyoxalase HSP31 OS=Saccharomyces cerevisiae (strain ATCC 204508 / S288c) GN=HSP31 PE=1 SV=1	1	2	13.5	25.67	237	0	5.9912	22846000	0	0	0	0	0	0	0	0	0	0	0	0	0	0	0	0	0	0	0	0	0	0	0	0	0	0	0	0	0	0	0	0	8050600	13761000	0	0	0	0
Q05636	Exosome complex component RRP45	RRP45	sp|Q05636|RRP45_YEAST Exosome complex component RRP45 OS=Saccharomyces cerevisiae (strain ATCC 204508 / S288c) GN=RRP45 PE=1 SV=1	1	6	21.3	33.962	305	0	102.33	298740000	0	0	0	0	0	0	0	0	18970000	0	0	0	0	0	537530	0	0	0	0	0	0	0	0	0	0	0	2320800	7697600	163570000	85080000	0	3867000	4121900	12572000	0	0	0	0
P41807	V-type proton ATPase subunit H	VMA13	sp|P41807|VATH_YEAST V-type proton ATPase subunit H OS=Saccharomyces cerevisiae (strain ATCC 204508 / S288c) GN=VMA13 PE=1 SV=1	1	7	15.7	54.415	478	0	24.71	100840000	0	0	0	0	0	38022000	1012900	0	0	0	0	0	0	0	0	0	658770	0	0	1308700	0	0	0	0	0	3170700	10698000	8037100	8711300	1074100	0	0	10829000	12321000	0	0	0	1400400
P25379	Catabolic L-serine/threonine dehydratase;L-serine dehydratase;L-threonine dehydratase	CHA1	sp|P25379|STDH_YEAST Catabolic L-serine/threonine dehydratase OS=Saccharomyces cerevisiae (strain ATCC 204508 / S288c) GN=CHA1 PE=1 SV=2	1	5	13.9	39.301	360	0	37.272	190680000	0	0	0	0	0	8312600	0	0	0	0	0	436740	0	0	0	0	0	0	0	0	0	0	0	0	3300300	0	142320000	11171000	0	0	0	0	14321000	10814000	0	0	0	0
P38323	Mitochondrial clpX-like chaperone MCX1	MCX1	sp|P38323|CLPX_YEAST ATP-dependent clpX-like chaperone, mitochondrial OS=Saccharomyces cerevisiae (strain ATCC 204508 / S288c) GN=MCX1 PE=1 SV=1	1	16	34.4	57.945	520	0	210.46	1453800000	0	0	0	0	0	0	0	0	0	0	0	0	0	0	0	1421400	0	0	0	0	5374500	1283400	1205900000	0	110580000	0	0	6622200	2547800	0	9326200	11222000	0	10604000	0	88968000	0	0
P39721	Protein AIM2	AIM2	sp|P39721|AIM2_YEAST Protein AIM2 OS=Saccharomyces cerevisiae (strain ATCC 204508 / S288c) GN=AIM2 PE=1 SV=1	1	4	20.3	27.089	246	0	9.3192	53258000	0	0	0	0	0	0	0	0	0	0	0	0	0	0	0	0	0	0	0	0	0	0	0	0	6042900	0	0	0	0	0	5540000	2314800	27420000	10292000	0	0	1648500	0
Q08235	Ribosome biogenesis protein BRX1	BRX1	sp|Q08235|BRX1_YEAST Ribosome biogenesis protein BRX1 OS=Saccharomyces cerevisiae (strain ATCC 204508 / S288c) GN=BRX1 PE=1 SV=2	1	13	44.3	33.531	291	0	323.31	10171000000	0	0	0	0	0	18528000	0	2893200	530950000	0	0	0	0	0	1468300	0	0	0	0	0	0	0	0	3886200	0	125050000	4342100	2064200000	6374800000	957040000	25661000	25183000	0	10141000	0	11894000	12789000	0
Q12212	Protein SIA1	SIA1	sp|Q12212|SIA1_YEAST Protein SIA1 OS=Saccharomyces cerevisiae (strain ATCC 204508 / S288c) GN=SIA1 PE=2 SV=1	1	2	3.5	71.845	622	0.0032279	2.072	1860100000	3455800	2359800	2682800	2462500	1981800	0	0	188680000	12362000	0	1463400	1437900	1456700	1905800	0	0	0	0	5052200	0	4424200	0	0	0	0	1133600000	267180000	83900000	100890000	0	16935000	0	4752100	8746900	0	2497500	4612900	0
Q12040	Broad-specificity phosphatase YOR283W	YOR283W	sp|Q12040|YO283_YEAST Broad-specificity phosphatase YOR283W OS=Saccharomyces cerevisiae (strain ATCC 204508 / S288c) GN=YOR283W PE=1 SV=1	1	3	19.1	26.176	230	0	13.262	152080000	0	0	0	0	0	0	0	0	0	0	0	0	2989900	0	0	0	0	0	0	4622800	3478600	0	0	0	0	4416400	4772000	0	6667400	0	565320	13380000	79510000	8213000	0	0	0	7913100
P40156	Required for respiratory growth protein 9, mitochondrial	RRG9	sp|P40156|RRG9_YEAST Required for respiratory growth protein 9, mitochondrial OS=Saccharomyces cerevisiae (strain ATCC 204508 / S288c) GN=RRG9 PE=1 SV=1	1	2	11.2	25.274	214	0	4.9584	9377000	0	0	0	0	0	0	0	0	0	0	0	0	0	1563300	0	0	0	0	0	0	0	0	0	0	0	0	0	0	0	0	0	0	0	7813700	0	0	0	0
P47065	Protein PET130	PET130	sp|P47065|PT130_YEAST Protein PET130 OS=Saccharomyces cerevisiae (strain ATCC 204508 / S288c) GN=PET130 PE=1 SV=1	1	2	6.9	39.812	347	0	3.9576	27050000	0	0	0	0	0	0	0	0	0	0	0	0	0	0	1925900	0	0	0	0	0	0	0	0	0	0	0	17451000	0	0	0	0	0	0	7672900	0	0	0	0
Q08465	Protein YNG1	YNG1	sp|Q08465|YNG1_YEAST Protein YNG1 OS=Saccharomyces cerevisiae (strain ATCC 204508 / S288c) GN=YNG1 PE=1 SV=1	1	5	25.6	25.35	219	0	65.462	196150000	0	0	0	0	0	0	0	0	0	0	0	0	0	0	0	0	0	0	0	0	0	0	0	0	0	0	0	0	0	0	6092100	160630000	11048000	7157100	0	0	11221000	0
P32497	Eukaryotic translation initiation factor 3 subunit C	NIP1	sp|P32497|EIF3C_YEAST Eukaryotic translation initiation factor 3 subunit C OS=Saccharomyces cerevisiae (strain ATCC 204508 / S288c) GN=NIP1 PE=1 SV=2	1	13	18.1	93.203	812	0	270.57	519990000	0	0	0	352470000	3470100	1939600	2352500	746280	825560	0	0	0	0	0	0	0	11920000	3655300	2292000	6634100	0	0	51989000	7874600	4550100	0	5327200	13738000	4976800	0	0	29977000	3112700	6937400	0	0	5200100	0
Q12446	Proline-rich protein LAS17	LAS17	sp|Q12446|LAS17_YEAST Proline-rich protein LAS17 OS=Saccharomyces cerevisiae (strain ATCC 204508 / S288c) GN=LAS17 PE=1 SV=1	1	6	10.1	67.571	633	0	27.893	173000000	0	0	1711700	0	2376800	582950	0	0	975650	0	1429200	0	0	0	0	0	131640	290090	71809000	16185000	0	2406100	3590600	1122900	41750000	671350	6174600	2932200	2528900	5900000	593530	0	2457700	6790800	0	274500	0	313420
Q12012	Uncharacterized protein YOR289W	YOR289W	sp|Q12012|YO289_YEAST Uncharacterized protein YOR289W OS=Saccharomyces cerevisiae (strain ATCC 204508 / S288c) GN=YOR289W PE=1 SV=1	1	7	25.9	29.099	251	0	24.587	185300000	2095500	2312900	0	0	3360000	0	3391500	459770	0	0	3579500	0	0	0	0	0	1645800	0	0	778750	0	0	0	0	0	0	1974300	0	0	0	2018400	73289000	83812000	6586200	0	0	0	0
P53292	37S ribosomal protein S35, mitochondrial	MRPS35	sp|P53292|RT35_YEAST 37S ribosomal protein S35, mitochondrial OS=Saccharomyces cerevisiae (strain ATCC 204508 / S288c) GN=MRPS35 PE=1 SV=1	1	10	35.7	39.575	345	0	201.38	751480000	0	0	0	0	51226000	0	4674300	5929800	0	0	0	0	452450	0	0	1753700	0	0	0	743760	0	4613100	0	0	0	13392000	519600000	130990000	0	689480	2783200	0	8274800	6362300	0	0	0	0
P32860	NifU-like protein, mitochondrial	NFU1	sp|P32860|NFU1_YEAST NifU-like protein, mitochondrial OS=Saccharomyces cerevisiae (strain ATCC 204508 / S288c) GN=NFU1 PE=1 SV=2	1	10	43.8	29.174	256	0	273.81	516270000	662460	0	0	0	0	0	0	1440500	3970900	0	0	8529700	0	0	4142700	0	6019900	0	0	502370	1473300	1817900	0	5208500	0	6183600	12360000	0	3137700	0	4074100	4166700	432070000	6164600	0	8517100	5825400	0
Q08649	Histone acetyltransferase ESA1	ESA1	sp|Q08649|ESA1_YEAST Histone acetyltransferase ESA1 OS=Saccharomyces cerevisiae (strain ATCC 204508 / S288c) GN=ESA1 PE=1 SV=1	1	14	38.7	52.612	445	0	224.81	480050000	0	0	1242400	18738000	9198000	13653000	19036000	906410	1632300	0	0	0	1399400	0	6941400	6904200	10126000	10229000	4096900	2926000	16524000	14322000	12017000	6852400	252380000	1277300	3629500	6338700	38841000	5086500	7551400	0	0	5769200	0	0	2434400	0
P40513	Mitochondrial acidic protein MAM33	MAM33	sp|P40513|MAM33_YEAST Mitochondrial acidic protein MAM33 OS=Saccharomyces cerevisiae (strain ATCC 204508 / S288c) GN=MAM33 PE=1 SV=1	1	5	13.9	30.132	266	0	27.626	260800000	0	0	0	0	0	0	0	0	0	0	0	0	0	0	0	0	0	0	0	0	0	0	0	4763800	0	0	0	8744700	0	0	0	3131000	238710000	5451700	0	0	0	0
Q00723	Pre-mRNA-splicing factor 38	PRP38	sp|Q00723|PRP38_YEAST Pre-mRNA-splicing factor 38 OS=Saccharomyces cerevisiae (strain ATCC 204508 / S288c) GN=PRP38 PE=1 SV=1	1	1	5.8	27.966	242	0.00068353	2.6683	12526000	0	0	0	0	0	0	0	0	0	0	0	0	0	0	0	0	0	0	0	0	0	0	0	0	0	0	0	0	0	0	0	0	7078800	5447700	0	0	0	0
P47148	Uncharacterized protein YJR111C		sp|P47148|YJ81_YEAST Uncharacterized protein YJR111C OS=Saccharomyces cerevisiae (strain ATCC 204508 / S288c) GN=YJR111C PE=1 SV=1	1	4	14.1	32.208	283	0	61.983	85997000	0	0	0	0	0	27094000	0	0	0	0	0	0	0	0	0	0	0	0	0	0	0	0	0	0	0	0	0	0	0	0	53292000	0	0	5326500	0	0	0	285410
P17255	V-type proton ATPase catalytic subunit A;Endonuclease PI-SceI	VMA1	sp|P17255|VATA_YEAST V-type proton ATPase catalytic subunit A OS=Saccharomyces cerevisiae (strain ATCC 204508 / S288c) GN=VMA1 PE=1 SV=3	1	20	20.1	118.64	1071	0	156.02	517130000	1503000	882810	956210	0	0	2997800	1045100	0	0	0	0	0	702840	0	788420	0	0	5317900	2600700	1758700	420610000	7487000	0	0	4357200	5907300	1507200	40766000	0	3585000	0	3825000	2497700	5210800	0	2824100	0	0
P53912;P25608;P54007	Uncharacterized protein YNL134C		sp|P53912|YNN4_YEAST Uncharacterized protein YNL134C OS=Saccharomyces cerevisiae (strain ATCC 204508 / S288c) GN=YNL134C PE=1 SV=1	3	4	13	41.164	376	0	21.871	149420000	0	0	0	0	0	0	0	3230900	0	0	0	0	0	0	0	0	0	0	0	0	0	0	0	7510200	0	92919000	7737900	5333200	2672700	10229000	0	3911100	8441400	5091800	0	0	0	0
P14306	Carboxypeptidase Y inhibitor	TFS1	sp|P14306|CPYI_YEAST Carboxypeptidase Y inhibitor OS=Saccharomyces cerevisiae (strain ATCC 204508 / S288c) GN=TFS1 PE=1 SV=2	1	3	15.1	24.357	219	0	17.176	71378000	0	0	0	0	0	0	0	0	0	0	0	0	0	0	0	0	0	0	0	0	0	0	0	0	0	0	0	0	0	0	0	0	56433000	5007700	0	0	4454700	5482600
Q04430	Pantothenate kinase CAB1	CAB1	sp|Q04430|PANK_YEAST Pantothenate kinase CAB1 OS=Saccharomyces cerevisiae (strain ATCC 204508 / S288c) GN=CAB1 PE=1 SV=1	1	7	20.2	40.903	367	0	37.946	254900000	0	0	0	0	0	0	0	1255000	0	0	0	0	0	0	0	0	0	0	0	0	0	0	0	0	0	238870000	986550	0	0	0	0	0	7207300	4728100	0	0	0	0
Q12230	Sphingolipid long chain base-responsive protein LSP1	LSP1	sp|Q12230|LSP1_YEAST Sphingolipid long chain base-responsive protein LSP1 OS=Saccharomyces cerevisiae (strain ATCC 204508 / S288c) GN=LSP1 PE=1 SV=1	1	4	12.6	38.071	341	0	3.4591	72213000	0	0	0	0	0	0	4674900	0	0	0	0	0	0	0	0	0	0	0	0	0	0	0	5656200	0	0	0	17587000	10131000	4575200	10528000	0	0	14396000	4664200	0	0	0	0
P25043	Proteasome subunit beta type-2	PUP1	sp|P25043|PSB2_YEAST Proteasome subunit beta type-2 OS=Saccharomyces cerevisiae (strain ATCC 204508 / S288c) GN=PUP1 PE=1 SV=1	1	4	16.1	28.268	261	0	27.441	64632000	3065500	0	0	0	0	0	0	0	0	0	18823000	888470	0	0	0	0	0	0	0	0	0	0	0	0	0	0	0	0	0	0	0	0	24358000	4582300	0	0	12915000	0
Q12329	Heat shock protein 42	HSP42	sp|Q12329|HSP42_YEAST Heat shock protein 42 OS=Saccharomyces cerevisiae (strain ATCC 204508 / S288c) GN=HSP42 PE=1 SV=1	1	7	24.8	42.816	375	0	90.269	691260000	0	0	0	0	0	320590000	0	0	0	0	0	0	0	0	3169400	10821000	2975700	1682900	4207600	3162200	0	7021200	7557800	0	9043600	16852000	56382000	54317000	34308000	67632000	14010000	41706000	7355200	4493600	0	164170	18918000	4094300
Q12229	UBX domain-containing protein 3	UBX3	sp|Q12229|UBX3_YEAST UBX domain-containing protein 3 OS=Saccharomyces cerevisiae (strain ATCC 204508 / S288c) GN=UBX3 PE=1 SV=1	1	1	3.3	52.943	455	0.0019881	2.3041	655680000	0	0	0	46295000	49585000	29760000	6610700	19216000	10838000	0	0	0	8684200	2230500	72187000	16254000	33412000	47295000	0	0	0	37935000	69477000	32660000	24229000	0	0	107520000	10980000	0	9089500	0	16950000	4475000	0	0	0	0
Q04373	Pumilio homology domain family member 6	PUF6	sp|Q04373|PUF6_YEAST Pumilio homology domain family member 6 OS=Saccharomyces cerevisiae (strain ATCC 204508 / S288c) GN=PUF6 PE=1 SV=1	1	15	23.8	75.105	656	0	268.03	1115600000	0	0	0	0	0	0	0	1170400	0	0	729480	0	0	0	0	1370600	1400400	0	62481000	934990000	28194000	10599000	27283000	14018000	958770	6322600	1913300	0	7244100	0	0	728830	11696000	4468100	0	0	0	0
Q06630	Mitochondrial homologous recombination protein 1	MHR1	sp|Q06630|MHR1_YEAST Mitochondrial homologous recombination protein 1 OS=Saccharomyces cerevisiae (strain ATCC 204508 / S288c) GN=MHR1 PE=1 SV=1	1	3	14.6	26.894	226	0	55.995	77130000	0	0	0	0	0	0	0	0	0	0	674070	0	0	0	0	0	0	0	0	0	0	0	0	0	0	0	0	0	0	0	2705800	13527000	55755000	4467900	0	0	0	0
P39533	Homocitrate dehydratase, mitochondrial	ACO2	sp|P39533|ACON2_YEAST Homocitrate dehydratase, mitochondrial OS=Saccharomyces cerevisiae (strain ATCC 204508 / S288c) GN=ACO2 PE=1 SV=1	1	18	25.5	86.582	789	0	323.31	836380000	0	0	0	1446800	0	4026000	0	0	0	0	0	0	0	0	0	4815800	583740000	23750000	13681000	7931100	0	0	13943000	5500900	9535100	9740600	31966000	26455000	28643000	34214000	3016300	2003900	24241000	4323100	0	0	3404600	0
P02829	ATP-dependent molecular chaperone HSP82	HSP82	sp|P02829|HSP82_YEAST ATP-dependent molecular chaperone HSP82 OS=Saccharomyces cerevisiae (strain ATCC 204508 / S288c) GN=HSP82 PE=1 SV=1	1	39	45.8	81.405	709	0	323.31	1842400000	0	0	0	0	1084400	0	10731000	0	0	0	1773500	0	0	0	1190500	1092100	860090000	412240000	169500000	108180000	79156000	11576000	35913000	12476000	14431000	26660000	16541000	7903000	14308000	1435900	664900	0	12495000	4295000	0	38715000	0	0
P20485	Choline kinase	CKI1	sp|P20485|KICH_YEAST Choline kinase OS=Saccharomyces cerevisiae (strain ATCC 204508 / S288c) GN=CKI1 PE=1 SV=1	1	3	4	66.316	582	0	11.64	54873000	0	0	0	0	0	0	0	0	0	0	0	0	0	0	0	0	0	0	0	0	29935000	0	0	8560500	5090000	0	0	0	0	0	2851400	0	0	4257900	0	0	1119100	0
P40207	Uncharacterized protein YMR134W		sp|P40207|YM17_YEAST Uncharacterized protein YMR134W OS=Saccharomyces cerevisiae (strain ATCC 204508 / S288c) GN=YMR134W PE=1 SV=1	1	4	19	27.921	237	0	10.857	193940000	707310	508030	1075700	11465000	5446700	6551500	0	0	1861700	0	373590	420560	2365200	729340	14920000	0	3130200	0	8057500	5759900	8269600	6229800	5435300	0	0	0	0	23268000	8211200	0	3807400	1234300	65245000	4257000	0	0	3787900	0
Q01574	Acetyl-coenzyme A synthetase 1	ACS1	sp|Q01574|ACS1_YEAST Acetyl-coenzyme A synthetase 1 OS=Saccharomyces cerevisiae (strain ATCC 204508 / S288c) GN=ACS1 PE=1 SV=2	1	2	2.9	79.14	713	0.0032404	2.1521	10046000	0	0	0	0	0	0	0	0	0	0	0	0	0	0	0	0	0	0	0	5804700	0	0	0	0	0	0	0	0	0	0	0	0	0	4241100	0	0	0	0
P32473	Pyruvate dehydrogenase E1 component subunit beta, mitochondrial	PDB1	sp|P32473|ODPB_YEAST Pyruvate dehydrogenase E1 component subunit beta, mitochondrial OS=Saccharomyces cerevisiae (strain ATCC 204508 / S288c) GN=PDB1 PE=1 SV=2	1	6	16.7	40.053	366	0	133.71	577200000	0	0	0	972450	0	0	0	0	0	0	0	0	0	0	0	6807400	0	0	0	0	0	0	0	0	3237200	0	7744600	547620000	1893900	0	0	0	1606500	4148100	0	0	3172200	0
P38747	OTU domain-containing protein 2	OTU2	sp|P38747|OTU2_YEAST OTU domain-containing protein 2 OS=Saccharomyces cerevisiae (strain ATCC 204508 / S288c) GN=OTU2 PE=1 SV=1	1	5	17.3	36.113	307	0	30.26	252980000	0	0	0	927120	0	0	1268600	722960	1082300	0	0	0	0	0	0	1260400	120600000	0	1570800	0	0	0	14014000	0	5230000	39291000	29247000	5950800	3881500	4326700	980000	17334000	0	4079400	0	0	0	0
Q99210	Maf-like protein YOR111W		sp|Q99210|YO111_YEAST Maf-like protein YOR111W OS=Saccharomyces cerevisiae (strain ATCC 204508 / S288c) GN=YOR111W PE=1 SV=1	1	1	4.7	26.477	232	0	3.3501	6702700	0	0	0	0	0	0	0	0	0	0	0	2733700	0	0	0	0	0	0	0	0	0	0	0	0	0	0	0	0	0	0	0	0	0	3969000	0	0	0	0
P32366	V-type proton ATPase subunit d	VMA6	sp|P32366|VA0D_YEAST V-type proton ATPase subunit d OS=Saccharomyces cerevisiae (strain ATCC 204508 / S288c) GN=VMA6 PE=1 SV=2	1	5	15.9	39.79	345	0	46.813	867270000	0	740580	1078200	0	0	0	0	0	62333000	0	0	0	990270	0	1016800	1105600	0	708430	956570	0	6370800	2936300	0	0	1045800	0	4494800	329960000	398500000	39012000	2107800	3117300	0	3919600	0	2285000	4591200	0
P40482	Protein transport protein SEC24	SEC24	sp|P40482|SEC24_YEAST Protein transport protein SEC24 OS=Saccharomyces cerevisiae (strain ATCC 204508 / S288c) GN=SEC24 PE=1 SV=1	1	6	8.7	103.63	926	0	20.671	121670000	0	0	0	1111800	0	0	0	0	0	0	0	0	0	0	2897500	48850000	21331000	2823600	1087700	4469300	3864300	0	14319000	0	0	0	0	0	0	0	0	0	17096000	3815800	0	0	0	0
P54115	Magnesium-activated aldehyde dehydrogenase, cytosolic	ALD6	sp|P54115|ALDH6_YEAST Magnesium-activated aldehyde dehydrogenase, cytosolic OS=Saccharomyces cerevisiae (strain ATCC 204508 / S288c) GN=ALD6 PE=1 SV=4	1	4	9.6	54.414	500	0	21.965	141950000	0	0	0	687820	0	43435000	0	0	0	0	0	0	0	0	0	0	0	0	0	0	0	0	0	81041000	0	1742000	5540600	780550	0	0	0	0	4963500	3763800	0	0	0	0
Q02773	Ribonuclease P protein component, mitochondrial	RPM2	sp|Q02773|RPM2_YEAST Ribonuclease P protein component, mitochondrial OS=Saccharomyces cerevisiae (strain ATCC 204508 / S288c) GN=RPM2 PE=1 SV=1	1	4	3.3	139.35	1202	0	12.655	106800000	0	0	0	0	0	1206500	4326400	0	0	0	0	0	0	0	23676000	5936500	0	0	0	1001300	0	1391800	0	2015500	0	1211300	8970300	0	0	0	0	5820100	47558000	3687500	0	0	0	0
P04801	Threonine--tRNA ligase, cytoplasmic	THS1	sp|P04801|SYTC_YEAST Threonine--tRNA ligase, cytoplasmic OS=Saccharomyces cerevisiae (strain ATCC 204508 / S288c) GN=THS1 PE=1 SV=2	1	20	29.3	84.519	734	0	166.49	1201500000	972620	0	1269900	2515200	2635700	63646000	4622000	0	0	0	0	0	0	1482800	3611000	4586900	13688000	339900000	339190000	70039000	216040000	52993000	5039500	1807600	7269100	13636000	0	14044000	20978000	696290	3612500	7279100	0	3659700	0	0	6270900	0
Q03246	37S ribosomal protein S17, mitochondrial	MRPS17	sp|Q03246|RT17_YEAST 37S ribosomal protein S17, mitochondrial OS=Saccharomyces cerevisiae (strain ATCC 204508 / S288c) GN=MRPS17 PE=1 SV=1	1	7	31.6	27.635	237	0	70.74	574170000	0	0	0	0	0	390190000	0	5020500	11011000	0	0	0	0	0	0	969690	0	0	0	0	0	0	0	0	1374200	0	4578400	5950200	14710000	0	0	113670000	2513800	3582000	0	0	15263000	0
Q06697	Cell division control protein 73	CDC73	sp|Q06697|CDC73_YEAST Cell division control protein 73 OS=Saccharomyces cerevisiae (strain ATCC 204508 / S288c) GN=CDC73 PE=1 SV=1	1	1	2.3	44.456	393	0	3.1497	11235000	0	0	0	0	0	0	0	0	0	0	0	0	0	0	1574200	0	0	0	0	0	0	0	0	0	0	0	0	0	0	0	0	6257600	0	3403000	0	0	0	0
P53632	Poly(A) RNA polymerase protein 2	PAP2	sp|P53632|PAP2_YEAST Poly(A) RNA polymerase protein 2 OS=Saccharomyces cerevisiae (strain ATCC 204508 / S288c) GN=PAP2 PE=1 SV=1	1	5	9.1	66.03	584	0	8.8829	58151000	0	0	0	0	0	3154800	0	0	1424600	0	0	0	0	0	0	0	0	0	0	36510000	0	1830200	0	1520500	675030	0	2422800	2246800	0	0	0	0	0	3401300	0	4965300	0	0
P48412	Nonsense-mediated mRNA decay protein 3	UPF3	sp|P48412|UPF3_YEAST Nonsense-mediated mRNA decay protein 3 OS=Saccharomyces cerevisiae (strain ATCC 204508 / S288c) GN=UPF3 PE=1 SV=1	1	2	4.7	44.924	387	0	10.259	149100000	0	0	0	0	0	43221000	0	0	0	0	0	0	0	0	9856500	6775500	2469000	4549700	6644300	6627400	11976000	11338000	6522800	7269100	13282000	0	0	0	7662400	1850700	0	3593400	2094400	3371200	0	0	0	0
P01120	Ras-like protein 2	RAS2	sp|P01120|RAS2_YEAST Ras-like protein 2 OS=Saccharomyces cerevisiae (strain ATCC 204508 / S288c) GN=RAS2 PE=1 SV=4	1	8	28	34.705	322	0	28.002	512070000	760560	0	0	0	0	0	0	44703000	613520	0	0	0	0	0	0	12921000	0	0	0	0	4029800	0	0	0	1304800	166480000	44786000	14750000	2507200	5036600	14289000	121960000	17625000	3347800	0	3527800	47607000	1398100
P33759	37S ribosomal protein S5, mitochondrial	MRPS5	sp|P33759|RT05_YEAST 37S ribosomal protein S5, mitochondrial OS=Saccharomyces cerevisiae (strain ATCC 204508 / S288c) GN=MRPS5 PE=1 SV=1	1	4	14	34.883	307	0	34.824	646430000	0	0	0	0	0	319200000	0	1146600	10348000	0	0	0	0	0	3457300	0	1502100	891720	1776300	4374100	0	0	5981900	0	0	534160	0	25202000	135970000	111980000	1118700	7104900	12739000	3110900	0	0	0	0
P25454	DNA repair protein RAD51	RAD51	sp|P25454|RAD51_YEAST DNA repair protein RAD51 OS=Saccharomyces cerevisiae (strain ATCC 204508 / S288c) GN=RAD51 PE=1 SV=1	1	3	9.5	42.963	400	0	4.9401	64787000	0	0	0	0	0	0	0	0	0	0	0	0	0	0	0	0	0	0	0	0	0	0	0	0	0	0	0	0	964180	5243000	11865000	12110000	20764000	3110900	0	0	10460000	268150
P40328	Probable 26S protease subunit YTA6	YTA6	sp|P40328|TBP6_YEAST Probable 26S protease subunit YTA6 OS=Saccharomyces cerevisiae (strain ATCC 204508 / S288c) GN=YTA6 PE=1 SV=2	1	2	3.7	85.299	754	0.0019868	2.304	32045000	0	0	0	0	0	0	0	0	0	0	0	0	0	0	0	0	0	0	0	0	4072500	0	0	0	0	0	2199400	0	5409500	0	0	4431400	7031900	3088000	0	0	0	0
P25342	Cell division control protein 10	CDC10	sp|P25342|CDC10_YEAST Cell division control protein 10 OS=Saccharomyces cerevisiae (strain ATCC 204508 / S288c) GN=CDC10 PE=1 SV=1	1	9	28.9	37.024	322	0	103.88	957710000	0	0	0	1543000	0	0	19556000	0	0	0	0	0	0	0	0	0	0	1267100	0	0	0	0	225640	3739500	0	4650400	469240000	372500000	11596000	64888000	0	1874000	2487800	2996900	0	1139900	0	0
P48561	Poly(A) RNA polymerase protein 1	TRF5	sp|P48561|TRF5_YEAST Poly(A) RNA polymerase protein 1 OS=Saccharomyces cerevisiae (strain ATCC 204508 / S288c) GN=TRF5 PE=1 SV=2	1	8	13.4	74.179	642	0	114.08	253290000	0	0	0	2068800	0	14972000	24779000	0	0	0	0	0	0	0	0	0	137490000	14140000	5036600	5291200	0	7573700	4005800	0	4832100	0	8016600	0	12153000	0	1773400	0	3297500	2991700	0	0	0	0
P00729	Carboxypeptidase Y	PRC1	sp|P00729|CBPY_YEAST Carboxypeptidase Y OS=Saccharomyces cerevisiae (strain ATCC 204508 / S288c) GN=PRC1 PE=1 SV=1	1	1	1.7	59.801	532	0.0092251	1.6419	12356000	0	0	0	0	0	0	0	0	0	0	0	0	0	0	0	0	0	0	0	0	0	1081400	6680600	0	971320	0	0	0	0	0	711620	0	0	2910600	0	0	0	0
P33331	Nuclear transport factor 2	NTF2	sp|P33331|NTF2_YEAST Nuclear transport factor 2 OS=Saccharomyces cerevisiae (strain ATCC 204508 / S288c) GN=NTF2 PE=1 SV=2	1	2	19.2	14.453	125	0	5.2248	152200000	0	0	6725100	4628400	0	0	0	0	18223000	0	1410900	0	5397600	15288000	0	0	0	0	6761300	31464000	0	0	1696800	0	0	0	0	0	0	7192500	0	13006000	5850700	2865400	0	3452700	0	0
P26754	Replication factor A protein 2	RFA2	sp|P26754|RFA2_YEAST Replication factor A protein 2 OS=Saccharomyces cerevisiae (strain ATCC 204508 / S288c) GN=RFA2 PE=1 SV=1	1	2	8.8	29.936	273	0	66.273	66643000	0	0	0	0	0	0	0	0	0	0	0	0	0	0	0	0	0	0	0	0	0	0	0	0	0	0	0	0	0	59953000	1718400	0	2126100	2845700	0	0	0	0
P00410	Cytochrome c oxidase subunit 2	COX2	sp|P00410|COX2_YEAST Cytochrome c oxidase subunit 2 OS=Saccharomyces cerevisiae (strain ATCC 204508 / S288c) GN=COX2 PE=1 SV=1	1	2	10.8	28.567	251	0	9.5902	47742000	0	0	0	0	0	0	0	0	0	0	0	0	0	0	0	0	0	0	0	0	0	0	0	0	0	0	0	0	0	0	0	0	44904000	2837400	0	0	0	0
P22203	V-type proton ATPase subunit E	VMA4	sp|P22203|VATE_YEAST V-type proton ATPase subunit E OS=Saccharomyces cerevisiae (strain ATCC 204508 / S288c) GN=VMA4 PE=1 SV=4	1	3	16.3	26.471	233	0	8.7572	64526000	0	0	0	0	0	0	0	0	0	0	0	0	0	0	0	0	0	0	0	0	0	0	0	0	0	0	0	0	0	0	0	9578700	37253000	2816400	0	5179500	9698500	0
P46669	DNA-directed RNA polymerase I subunit RPA43	RPA43	sp|P46669|RPA43_YEAST DNA-directed RNA polymerase I subunit RPA43 OS=Saccharomyces cerevisiae (strain ATCC 204508 / S288c) GN=RPA43 PE=1 SV=2	1	1	3.7	36.224	326	0	4.0894	96132000	0	0	0	0	0	0	724400	1337300	0	0	0	0	0	0	1451000	0	0	0	0	0	0	30090000	0	0	0	0	0	0	17751000	10224000	6392500	10827000	11971000	2768500	0	0	0	2595000
P11745	Ran GTPase-activating protein 1	RNA1	sp|P11745|RNA1_YEAST Ran GTPase-activating protein 1 OS=Saccharomyces cerevisiae (strain ATCC 204508 / S288c) GN=RNA1 PE=1 SV=2	1	2	6.9	45.815	407	0	4.1144	34704000	0	0	0	0	0	5685600	0	0	0	0	0	0	0	0	0	0	168460	0	376310	179550	289610	244150	457760	0	0	0	4460900	2172900	6886400	3178800	0	4347800	2235200	2751700	0	0	0	0
Q12179	Uncharacterized protein YPL245W	YPL245W	sp|Q12179|YP245_YEAST Uncharacterized protein YPL245W OS=Saccharomyces cerevisiae (strain ATCC 204508 / S288c) GN=YPL245W PE=1 SV=1	1	6	15.4	52.256	454	0	55.524	632420000	0	0	0	0	0	0	0	0	0	0	0	0	0	0	0	0	0	0	3182900	0	0	0	0	0	52202000	3747900	6902500	5622400	7440100	10720000	0	5309400	531830000	2628800	0	0	2833700	0
Q12246	Sphingoid long chain base kinase 4	LCB4	sp|Q12246|LCB4_YEAST Sphingoid long chain base kinase 4 OS=Saccharomyces cerevisiae (strain ATCC 204508 / S288c) GN=LCB4 PE=1 SV=1	1	2	3.4	69.639	624	0.003856	2.0235	91966000	0	0	0	0	6451500	0	0	0	0	0	0	0	0	0	0	0	0	0	0	0	1311600	1707900	5562400	3512700	2548600	0	3176700	0	2808500	1803200	6676100	34182000	15719000	2608100	0	0	3897900	0
Q12434	Rho GDP-dissociation inhibitor	RDI1	sp|Q12434|GDIR_YEAST Rho GDP-dissociation inhibitor OS=Saccharomyces cerevisiae (strain ATCC 204508 / S288c) GN=RDI1 PE=1 SV=1	1	4	26.7	23.138	202	0	10.05	38309000	0	0	0	0	0	0	0	0	3911600	0	0	2362100	0	0	0	0	0	0	0	0	0	0	0	0	0	0	0	0	7907900	0	0	0	0	2604300	0	21523000	0	0
Q12314	Protein arginine N-methyltransferase SFM1	SFM1	sp|Q12314|SFM1_YEAST Protein arginine N-methyltransferase SFM1 OS=Saccharomyces cerevisiae (strain ATCC 204508 / S288c) GN=SFM1 PE=1 SV=1	1	2	9.9	24.743	213	0	12.245	27262000	2472100	2167200	0	0	3006100	0	0	0	0	0	1094000	10351000	604770	2072100	1775700	0	1230600	0	0	0	0	0	0	0	0	0	0	0	0	0	0	0	0	2488300	0	0	0	0
P53551	Histone H1	HHO1	sp|P53551|H1_YEAST Histone H1 OS=Saccharomyces cerevisiae (strain ATCC 204508 / S288c) GN=HHO1 PE=1 SV=1	1	3	12.8	27.803	258	0	6.4711	68434000	0	0	0	0	0	0	0	0	0	0	0	0	0	0	0	0	4111000	0	0	0	0	0	0	0	0	0	1986100	2531300	6375700	48915000	0	537180	0	2419800	0	0	0	1557800
P36036	RNA annealing protein YRA2	YRA2	sp|P36036|YRA2_YEAST RNA annealing protein YRA2 OS=Saccharomyces cerevisiae (strain ATCC 204508 / S288c) GN=YRA2 PE=1 SV=1	1	1	4.9	23.777	203	0.0087555	1.7483	8133500	0	0	0	0	0	0	0	0	0	0	0	0	0	0	0	0	0	0	0	0	0	0	0	0	0	0	0	0	0	0	0	0	4524400	2354300	0	0	1254800	0
P34077	Nucleoporin NIC96	NIC96	sp|P34077|NIC96_YEAST Nucleoporin NIC96 OS=Saccharomyces cerevisiae (strain ATCC 204508 / S288c) GN=NIC96 PE=1 SV=2	1	11	13.9	96.173	839	0	117.94	219090000	0	341080	3198000	114580000	0	0	0	724350	648410	0	0	0	1367900	3690400	2249800	9097300	0	1151100	10798000	1112300	13226000	0	3695800	0	0	0	1601500	19168000	3106700	0	0	1708800	0	2222800	0	4078600	0	0
P39522	Dihydroxy-acid dehydratase, mitochondrial	ILV3	sp|P39522|ILV3_YEAST Dihydroxy-acid dehydratase, mitochondrial OS=Saccharomyces cerevisiae (strain ATCC 204508 / S288c) GN=ILV3 PE=1 SV=2	1	12	22.4	62.86	585	0	120.46	440340000	0	0	0	0	0	0	0	1124500	0	0	0	795920	0	0	0	0	1832500	0	0	0	0	7650300	335460000	26872000	1083900	5482500	19988000	15607000	0	2343100	0	16272000	0	2180800	0	0	2140100	0
P07244	Bifunctional purine biosynthetic protein ADE5,7;Phosphoribosylamine--glycine ligase;Phosphoribosylformylglycinamidine cyclo-ligase	ADE5,7	sp|P07244|PUR2_YEAST Bifunctional purine biosynthetic protein ADE5,7 OS=Saccharomyces cerevisiae (strain ATCC 204508 / S288c) GN=ADE5,7 PE=1 SV=1	1	9	12.5	86.067	802	0	46.11	167330000	0	1735600	1502500	470520	24296000	0	0	0	0	0	0	0	0	0	0	0	0	64267000	9147200	0	0	914340	246490	0	6050000	0	0	0	8146200	2748900	0	5192300	0	2128100	0	0	40479000	0
P53195	Conserved oligomeric Golgi complex subunit 7	COG7	sp|P53195|COG7_YEAST Conserved oligomeric Golgi complex subunit 7 OS=Saccharomyces cerevisiae (strain ATCC 204508 / S288c) GN=COG7 PE=1 SV=1	1	6	21.5	31.775	279	0	41.122	264300000	0	0	0	0	0	0	0	0	2766300	0	0	0	0	0	0	0	0	0	0	0	18657000	8770700	0	0	3469500	0	5467400	0	10045000	180100000	3549800	29371000	0	2099100	0	0	0	0
P00817	Inorganic pyrophosphatase	IPP1	sp|P00817|IPYR_YEAST Inorganic pyrophosphatase OS=Saccharomyces cerevisiae (strain ATCC 204508 / S288c) GN=IPP1 PE=1 SV=4	1	7	30.7	32.299	287	0	44.837	212070000	0	0	0	0	0	0	0	0	53658000	0	0	3291000	2818900	2206700	3478300	521030	0	0	2969900	0	0	2085800	2729500	0	0	0	3634500	0	108170000	20326000	2645500	0	0	2091800	0	0	1447300	0
Q04601	Anaphase-promoting complex subunit 4	APC4	sp|Q04601|APC4_YEAST Anaphase-promoting complex subunit 4 OS=Saccharomyces cerevisiae (strain ATCC 204508 / S288c) GN=APC4 PE=1 SV=1	1	7	10.3	75.255	652	0	33.973	61400000	0	0	0	0	0	0	0	0	0	0	0	0	0	0	647550	0	0	0	0	0	58085000	0	0	0	0	0	601020	0	0	0	0	0	0	2066600	0	0	0	0
P53315	6-phosphogluconolactonase 4	SOL4	sp|P53315|SOL4_YEAST 6-phosphogluconolactonase 4 OS=Saccharomyces cerevisiae (strain ATCC 204508 / S288c) GN=SOL4 PE=1 SV=1	1	1	5.9	28.447	255	0	5.9128	11660000	0	0	0	0	0	0	0	0	0	0	0	0	0	0	0	0	0	0	0	0	0	0	0	0	0	0	0	0	0	0	0	0	9613500	2046900	0	0	0	0
P07267	Saccharopepsin	PEP4	sp|P07267|CARP_YEAST Saccharopepsin OS=Saccharomyces cerevisiae (strain ATCC 204508 / S288c) GN=PEP4 PE=1 SV=1	1	5	13.3	44.498	405	0	21.613	70329000	0	0	0	0	0	0	11483000	5027100	0	0	0	0	0	0	0	0	0	0	0	0	0	0	0	0	0	41960000	4977300	1694500	0	0	0	2945100	0	2002600	0	0	239300	0
Q07824	Polyamine transporter 1	TPO1	sp|Q07824|TPO1_YEAST Polyamine transporter 1 OS=Saccharomyces cerevisiae (strain ATCC 204508 / S288c) GN=TPO1 PE=1 SV=1	1	1	1.5	64.272	586	0	25.498	17943000	0	0	0	2315200	0	0	0	0	0	0	0	0	0	0	1826800	0	0	0	0	0	0	0	0	0	0	0	0	0	0	0	0	0	5110500	1997300	0	0	0	4151500
P47076	DNA-directed RNA polymerase III subunit RPC9	RPC17	sp|P47076|RPC9_YEAST DNA-directed RNA polymerase III subunit RPC9 OS=Saccharomyces cerevisiae (strain ATCC 204508 / S288c) GN=RPC17 PE=1 SV=2	1	5	32.3	18.596	161	0	33.198	358770000	6046200	0	0	7671700	2773600	13120000	14727000	2159400	1703300	0	0	1451000	45553000	0	3024500	869360	0	1479500	545530	745130	0	993520	2134900	0	0	0	5919400	9502400	0	0	0	0	0	1969800	0	193850000	37339000	5188100
P25087	Sterol 24-C-methyltransferase	ERG6	sp|P25087|ERG6_YEAST Sterol 24-C-methyltransferase OS=Saccharomyces cerevisiae (strain ATCC 204508 / S288c) GN=ERG6 PE=1 SV=4	1	6	20.1	43.43	383	0	40.996	133980000	0	0	0	0	0	3170400	94981000	0	0	0	0	0	0	0	0	0	0	0	0	0	0	0	0	0	0	15749000	16544000	1697500	0	0	0	0	0	1840300	0	0	0	0
P53303	Zinc finger protein ZPR1	ZPR1	sp|P53303|ZPR1_YEAST Zinc finger protein ZPR1 OS=Saccharomyces cerevisiae (strain ATCC 204508 / S288c) GN=ZPR1 PE=1 SV=1	1	4	8	55.071	486	0	8.3885	79449000	0	0	0	0	0	2407500	0	0	1450700	0	0	0	0	0	910000	0	0	0	0	0	0	0	6451700	19958000	41824000	0	0	1586800	1848400	0	0	0	0	1770200	0	0	1241400	0
P36121	DNA-directed RNA polymerase III subunit RPC5	RPC37	sp|P36121|RPC5_YEAST DNA-directed RNA polymerase III subunit RPC5 OS=Saccharomyces cerevisiae (strain ATCC 204508 / S288c) GN=RPC37 PE=1 SV=1	1	1	4.3	32.142	282	0.0098099	1.6134	11585000	0	0	0	0	0	0	0	0	0	0	0	0	0	0	0	0	0	0	0	0	0	0	0	0	0	0	7696400	0	0	0	0	2135100	0	1754000	0	0	0	0
Q02908	Elongator complex protein 3	ELP3	sp|Q02908|ELP3_YEAST Elongator complex protein 3 OS=Saccharomyces cerevisiae (strain ATCC 204508 / S288c) GN=ELP3 PE=1 SV=1	1	16	27.5	63.656	557	0	167.55	766830000	0	0	0	0	0	0	3345100	2590700	1918600	0	0	0	0	714390	0	0	0	0	0	879360	3515900	2389000	722770000	2875000	1585300	1297600	0	0	0	474470	2242100	0	2636700	1724800	0	309870	14437000	1130500
Q06506	Ribosomal RNA-processing protein 9	RRP9	sp|Q06506|RRP9_YEAST Ribosomal RNA-processing protein 9 OS=Saccharomyces cerevisiae (strain ATCC 204508 / S288c) GN=RRP9 PE=1 SV=1	1	13	24.6	65.053	573	0	213.43	702560000	6325500	6048000	5382100	48166000	44951000	10146000	0	0	0	0	0	0	0	0	650330	4099900	0	4884700	5823900	0	393100000	37154000	7381000	0	96685000	760950	863780	3381100	4991800	10863000	0	9197200	0	1708800	0	0	0	0
P40015	Inositol phosphosphingolipids phospholipase C	ISC1	sp|P40015|ISC1_YEAST Inositol phosphosphingolipids phospholipase C OS=Saccharomyces cerevisiae (strain ATCC 204508 / S288c) GN=ISC1 PE=1 SV=1	1	1	2.1	53.94	477	0	2.9447	20694000	0	0	0	0	0	18990000	0	0	0	0	0	0	0	0	0	0	0	0	0	0	0	0	0	0	0	0	0	0	0	0	0	0	0	1703600	0	0	0	0
P38840	Aromatic amino acid aminotransferase 2	ARO9	sp|P38840|ARO9_YEAST Aromatic amino acid aminotransferase 2 OS=Saccharomyces cerevisiae (strain ATCC 204508 / S288c) GN=ARO9 PE=1 SV=3	1	2	4.3	58.527	513	0	3.9405	24286000	0	0	0	0	0	0	0	0	0	0	0	0	0	0	0	0	0	0	0	0	0	0	0	0	21102000	0	0	0	0	0	1484800	0	0	1699200	0	0	0	0
P32329	Aspartic proteinase 3;Aspartic proteinase 3 subunit alpha;Aspartic proteinase 3 subunit beta	YPS1	sp|P32329|YPS1_YEAST Aspartic proteinase 3 OS=Saccharomyces cerevisiae (strain ATCC 204508 / S288c) GN=YPS1 PE=1 SV=2	1	1	1.6	60.009	569	0	4.6001	73910000	0	0	0	2724900	0	0	0	0	0	0	0	0	0	0	46249000	10334000	2171800	1068400	0	0	0	0	6086400	0	0	0	0	1375900	0	2234300	0	0	0	1665800	0	0	0	0
Q12306	Ubiquitin-like protein SMT3	SMT3	sp|Q12306|SMT3_YEAST Ubiquitin-like protein SMT3 OS=Saccharomyces cerevisiae (strain ATCC 204508 / S288c) GN=SMT3 PE=1 SV=1	1	3	39.6	11.597	101	0	16.145	246010000	0	5071700	0	0	2450400	0	590650	405310	0	0	0	0	0	0	0	1595600	0	1675300	0	790180	7270800	4767000	19116000	107040000	12994000	4230600	3000100	0	0	1387400	0	1549000	13621000	1640500	0	0	1313400	55504000
P33419	Spindle pole component 29	SPC29	sp|P33419|SPC29_YEAST Spindle pole component 29 OS=Saccharomyces cerevisiae (strain ATCC 204508 / S288c) GN=SPC29 PE=1 SV=1	1	9	38.3	29.28	253	0	178.63	441270000	0	0	0	0	0	0	0	0	580960	0	0	0	0	0	0	0	0	2640800	2173600	0	0	0	0	0	0	4047600	3223800	11588000	0	0	392840000	21208000	1330900	1634600	0	0	0	0
P32892	ATP-dependent RNA helicase DRS1	DRS1	sp|P32892|DRS1_YEAST ATP-dependent RNA helicase DRS1 OS=Saccharomyces cerevisiae (strain ATCC 204508 / S288c) GN=DRS1 PE=1 SV=2	1	8	11.3	84.842	752	0	24.974	320100000	0	0	0	0	28997000	593270	0	3627800	0	0	11316000	0	0	0	1217500	7084900	59765000	2550100	6369100	64877000	2089700	10434000	57723000	25033000	7193900	5668400	9617500	1886600	6201700	2761100	0	0	0	1569300	0	1458100	600730	1469900
P28272	Dihydroorotate dehydrogenase (fumarate)	URA1	sp|P28272|PYRD_YEAST Dihydroorotate dehydrogenase (fumarate) OS=Saccharomyces cerevisiae (strain ATCC 204508 / S288c) GN=URA1 PE=1 SV=1	1	1	2.9	34.801	314	0	3.2831	85081000	0	0	0	0	0	0	0	0	0	0	0	0	0	0	0	0	0	0	0	0	0	0	0	0	0	0	0	0	6805300	71204000	3892100	0	1631500	1548100	0	0	0	0
P32867	Protein SSO1	SSO1	sp|P32867|SSO1_YEAST Protein SSO1 OS=Saccharomyces cerevisiae (strain ATCC 204508 / S288c) GN=SSO1 PE=1 SV=2	1	9	30.7	33.106	290	0	323.31	4795500000	0	0	0	0	0	0	0	0	877570	0	0	0	0	0	0	0	0	0	0	0	0	0	0	3566800	0	392730	2628200000	1836700000	73344000	27207000	0	0	782410	1509500	0	329430	100270000	55881000
P35191	DnaJ homolog 1, mitochondrial	MDJ1	sp|P35191|MDJ1_YEAST DnaJ homolog 1, mitochondrial OS=Saccharomyces cerevisiae (strain ATCC 204508 / S288c) GN=MDJ1 PE=1 SV=1	1	20	35.2	55.56	511	0	323.31	963800000	0	0	0	4315000	0	24067000	0	0	0	0	0	1507100	0	0	0	0	6548900	0	0	5417900	10736000	0	0	7291100	872630000	0	1984100	0	3657100	12531000	2544600	0	0	1505500	0	1687900	0	996590
P38791	Deoxyhypusine synthase	DYS1	sp|P38791|DHYS_YEAST Deoxyhypusine synthase OS=Saccharomyces cerevisiae (strain ATCC 204508 / S288c) GN=DYS1 PE=1 SV=1	1	3	8.3	42.892	387	0	4.9777	22545000	0	0	0	0	0	0	2486700	0	0	0	0	0	0	0	0	0	0	0	0	0	0	0	0	0	0	1960700	1731800	815660	0	0	300630	0	2240000	1453700	0	1394400	0	7008600
Q03761	Transcription initiation factor TFIID subunit 12	TAF12	sp|Q03761|TAF12_YEAST Transcription initiation factor TFIID subunit 12 OS=Saccharomyces cerevisiae (strain ATCC 204508 / S288c) GN=TAF12 PE=1 SV=1	1	4	9.8	61.072	539	0	7.1622	76137000	0	0	0	18044000	0	7619100	0	1113700	788090	0	0	0	0	0	1447000	0	0	0	0	1307500	43470000	952510	0	0	0	0	0	0	0	0	0	0	0	1395800	0	0	0	0
P25369	LAS seventeen-binding protein 5	LSB5	sp|P25369|LSB5_YEAST LAS seventeen-binding protein 5 OS=Saccharomyces cerevisiae (strain ATCC 204508 / S288c) GN=LSB5 PE=1 SV=3	1	1	3.7	39.872	354	0.0044757	1.9566	5426700	0	0	0	0	0	0	4077400	0	0	0	0	0	0	0	0	0	0	0	0	0	0	0	0	0	0	0	0	0	0	0	0	0	0	1349300	0	0	0	0
P53930	Protein AF-9 homolog	YAF9	sp|P53930|AF9_YEAST Protein AF-9 homolog OS=Saccharomyces cerevisiae (strain ATCC 204508 / S288c) GN=YAF9 PE=1 SV=1	1	5	20.8	25.981	226	0	76.503	103560000	0	0	0	0	0	3266800	0	9534600	0	0	0	0	0	0	0	0	0	0	2551100	0	0	0	0	0	0	2556500	0	0	0	0	0	74441000	6681200	1347500	0	0	0	0
P16370	DNA-directed RNA polymerase II subunit RPB3	RPB3	sp|P16370|RPB3_YEAST DNA-directed RNA polymerase II subunit RPB3 OS=Saccharomyces cerevisiae (strain ATCC 204508 / S288c) GN=RPB3 PE=1 SV=2	1	4	14.2	35.297	318	0	33.726	74200000	0	0	0	0	515230	0	0	852870	0	0	0	0	0	0	0	0	0	0	0	0	0	0	0	0	0	33922000	11534000	10035000	7636700	2463600	936750	0	4998100	1304800	0	0	0	0
Q99288	Broad-range acid phosphatase DET1	DET1	sp|Q99288|DET1_YEAST Broad-range acid phosphatase DET1 OS=Saccharomyces cerevisiae (strain ATCC 204508 / S288c) GN=DET1 PE=1 SV=1	1	4	12.9	39.172	334	0	22.243	153780000	0	0	0	5869100	0	0	0	0	0	0	0	0	0	0	0	0	0	0	5343600	1901500	0	0	0	3471000	1862700	0	39704000	77306000	17023000	0	0	0	0	1303600	0	0	0	0
P53183	Putative uncharacterized oxidoreductase YGL039W	YGL039W	sp|P53183|YGD9_YEAST Putative uncharacterized oxidoreductase YGL039W OS=Saccharomyces cerevisiae (strain ATCC 204508 / S288c) GN=YGL039W PE=1 SV=1	1	2	6.9	38.259	348	0	5.7158	70675000	0	0	0	0	0	0	0	0	0	0	0	0	0	0	0	0	0	0	0	0	0	0	0	0	0	0	45485000	19994000	0	0	0	2918200	0	1276400	0	0	0	1001300
P26570;P33329	Serine/threonine-protein phosphatase PP-Z1;Serine/threonine-protein phosphatase PP-Z2	PPZ1;PPZ2	sp|P26570|PPZ1_YEAST Serine/threonine-protein phosphatase PP-Z1 OS=Saccharomyces cerevisiae (strain ATCC 204508 / S288c) GN=PPZ1 PE=1 SV=5;sp|P33329|PPZ2_YEAST Serine/threonine-protein phosphatase PP-Z2 OS=Saccharomyces cerevisiae (strain ATCC 204508 / S28	2	2	1.6	77.49	692	0	29.72	347520000	0	0	0	0	0	0	0	0	30497000	0	0	0	0	0	0	0	867520	0	0	0	0	0	0	0	1448000	464560	0	1618200	130840000	179410000	0	1095800	0	1274800	0	0	0	0
P53900	Prefoldin subunit 4	GIM3	sp|P53900|PFD4_YEAST Prefoldin subunit 4 OS=Saccharomyces cerevisiae (strain ATCC 204508 / S288c) GN=GIM3 PE=1 SV=1	1	6	42.6	15.18	129	0	79.913	290010000	0	0	0	16522000	3423300	0	0	0	447680	0	0	0	0	0	1143900	3977600	0	0	4185600	0	13664000	0	0	0	0	0	0	0	3498200	4402400	19777000	0	2575500	1213300	0	0	193440000	0
Q12339	rRNA-processing protein UTP23	UTP23	sp|Q12339|UTP23_YEAST rRNA-processing protein UTP23 OS=Saccharomyces cerevisiae (strain ATCC 204508 / S288c) GN=UTP23 PE=1 SV=1	1	1	4.3	28.801	254	0.0087282	1.7304	40591000	0	0	0	0	0	0	0	0	0	0	0	0	0	0	1005400	3668600	0	1149100	0	0	2403900	0	0	2197200	0	0	0	12751000	4743600	6429000	0	0	0	1169100	0	5074600	0	0
Q05123	Actin-like protein ARP9	ARP9	sp|Q05123|ARP9_YEAST Actin-like protein ARP9 OS=Saccharomyces cerevisiae (strain ATCC 204508 / S288c) GN=ARP9 PE=1 SV=1	1	2	4.1	53.074	467	0	5.6378	26131000	0	0	7939700	0	0	0	0	0	0	0	0	0	0	0	0	0	0	0	0	0	0	0	0	0	15844000	0	0	1181800	0	0	0	0	0	1166000	0	0	0	0
P22217	Thioredoxin-1	TRX1	sp|P22217|TRX1_YEAST Thioredoxin-1 OS=Saccharomyces cerevisiae (strain ATCC 204508 / S288c) GN=TRX1 PE=1 SV=3	1	4	45.6	11.235	103	0	24.524	52135000	0	1198700	3092600	0	0	0	0	0	0	0	2472700	0	1046700	617840	0	0	2347600	8479100	0	0	0	0	0	0	0	0	717980	0	0	0	0	0	3260700	1135000	0	0	981150	0
P33399	La protein homolog	LHP1	sp|P33399|LHP1_YEAST La protein homolog OS=Saccharomyces cerevisiae (strain ATCC 204508 / S288c) GN=LHP1 PE=1 SV=2	1	7	32	32.104	275	0	94.172	199240000	0	0	0	0	0	0	0	0	0	0	0	0	0	0	0	0	0	0	0	0	0	0	0	0	0	0	0	0	179090000	3036400	0	989940	0	1123200	0	0	13159000	759340
P07258	Carbamoyl-phosphate synthase arginine-specific small chain	CPA1	sp|P07258|CARA_YEAST Carbamoyl-phosphate synthase arginine-specific small chain OS=Saccharomyces cerevisiae (strain ATCC 204508 / S288c) GN=CPA1 PE=1 SV=1	1	1	2.9	45.361	411	0.0087391	1.7339	10876000	0	0	0	0	0	0	8318700	0	0	0	0	0	0	0	0	0	0	0	0	0	0	0	0	0	0	0	1455100	0	0	0	0	0	0	1102000	0	0	0	0
P10662	37S ribosomal protein MRP1, mitochondrial	MRP1	sp|P10662|RT01_YEAST 37S ribosomal protein MRP1, mitochondrial OS=Saccharomyces cerevisiae (strain ATCC 204508 / S288c) GN=MRP1 PE=1 SV=2	1	8	27.7	36.728	321	0	93.941	421870000	566480	0	0	0	0	0	0	0	4367600	0	0	0	0	0	0	0	0	0	0	0	0	0	0	0	0	0	913090	337410000	61066000	0	0	0	0	1098100	0	0	0	15408000
P43603	LAS seventeen-binding protein 3	LSB3	sp|P43603|LSB3_YEAST LAS seventeen-binding protein 3 OS=Saccharomyces cerevisiae (strain ATCC 204508 / S288c) GN=LSB3 PE=1 SV=3	1	7	13.7	49.343	459	0	14.539	104970000	807350	0	585560	0	0	32259000	0	374320	0	0	0	0	0	0	0	0	0	0	0	0	0	0	0	0	0	5910500	3527500	1103700	2721400	1970000	0	2764500	0	1067900	0	0	41032000	0
P39742	Translocation protein SEC72	SEC72	sp|P39742|SEC72_YEAST Translocation protein SEC72 OS=Saccharomyces cerevisiae (strain ATCC 204508 / S288c) GN=SEC72 PE=1 SV=3	1	3	15	21.607	193	0	7.2653	165840000	0	0	0	0	0	0	0	944650	0	0	0	0	1295800	0	0	9497700	7667300	0	0	0	0	0	4549800	0	6538900	0	0	9991300	0	5263500	1374600	0	0	1002700	0	97204000	15101000	5410600
P38795	Glutamine-dependent NAD(+) synthetase	QNS1	sp|P38795|NADE_YEAST Glutamine-dependent NAD(+) synthetase OS=Saccharomyces cerevisiae (strain ATCC 204508 / S288c) GN=QNS1 PE=1 SV=1	1	1	1.4	80.685	714	0.0092879	1.6967	41600000	0	0	0	0	0	0	0	1866700	0	0	0	0	0	0	0	0	0	0	0	2990100	0	0	0	0	0	32496000	3264900	0	0	0	0	0	0	982790	0	0	0	0
P36013	NAD-dependent malic enzyme, mitochondrial	MAE1	sp|P36013|MAOM_YEAST NAD-dependent malic enzyme, mitochondrial OS=Saccharomyces cerevisiae (strain ATCC 204508 / S288c) GN=MAE1 PE=1 SV=1	1	10	19.4	74.375	669	0	141.75	288050000	457280	0	1015900	0	1109800	0	0	0	0	0	0	0	0	0	0	676100	5919800	0	0	0	247010000	0	597490	12001000	1034800	3136100	3469700	0	4262700	6430300	0	0	0	932780	0	0	0	0
P38902	DNA-directed RNA polymerase II subunit RPB11	RPB11	sp|P38902|RPB11_YEAST DNA-directed RNA polymerase II subunit RPB11 OS=Saccharomyces cerevisiae (strain ATCC 204508 / S288c) GN=RPB11 PE=1 SV=1	1	7	52.5	13.615	120	0	84.943	462190000	0	0	12940000	0	0	0	0	0	1448900	0	0	0	0	16899000	0	0	0	0	0	0	0	6759900	0	5078900	104710000	3099400	15876000	0	5933600	0	0	0	0	884730	0	2078600	0	0
P14120	60S ribosomal protein L30	RPL30	sp|P14120|RL30_YEAST 60S ribosomal protein L30 OS=Saccharomyces cerevisiae (strain ATCC 204508 / S288c) GN=RPL30 PE=1 SV=3	1	5	57.1	11.415	105	0	222.89	4181400000	0	0	2083500	0	0	4941600	6578500	0	0	0	0	0	0	0	0	0	0	2685800	6796900	358640	0	0	0	0	0	920870	0	0	8127100	0	0	1322000	1026700	869850	0	23008000	6550300	24096000
Q02983	RNA polymerase I-specific transcription initiation factor RRN5	RRN5	sp|Q02983|RRN5_YEAST RNA polymerase I-specific transcription initiation factor RRN5 OS=Saccharomyces cerevisiae (strain ATCC 204508 / S288c) GN=RRN5 PE=1 SV=1	1	2	5	41.72	363	0.0087336	1.7315	934230000	0	68889000	12465000	30829000	56258000	14700000	13864000	75183000	32758000	0	0	0	124260000	0	0	39489000	155470000	61942000	0	0	0	0	0	41652000	42508000	0	0	35447000	739420	38505000	0	13842000	0	869240	0	0	7762300	66793000
P14743	Glycylpeptide N-tetradecanoyltransferase	NMT1	sp|P14743|NMT_YEAST Glycylpeptide N-tetradecanoyltransferase OS=Saccharomyces cerevisiae (strain ATCC 204508 / S288c) GN=NMT1 PE=1 SV=1	1	18	39.6	52.837	455	0	145.96	589410000	0	0	0	584150	0	383910	0	0	0	0	582590	0	0	0	0	240410	0	1697800	0	1216600	0	0	431830	2654600	557690000	5264300	367520	0	1142500	699500	0	9779500	5829000	849290	0	0	0	0
P33309	Protein DOM34	DOM34	sp|P33309|DOM34_YEAST Protein DOM34 OS=Saccharomyces cerevisiae (strain ATCC 204508 / S288c) GN=DOM34 PE=1 SV=2	1	3	10.6	44.057	386	0	78.253	102000000	0	0	0	0	0	0	60748000	0	0	0	0	29388000	0	0	0	0	0	0	0	0	0	0	0	0	0	0	4627900	1249000	0	3896200	0	0	0	833800	0	1256000	0	0
P41912	Ras modification protein ERF4	SHR5	sp|P41912|ERFD_YEAST Ras modification protein ERF4 OS=Saccharomyces cerevisiae (strain ATCC 204508 / S288c) GN=SHR5 PE=1 SV=1	1	1	3.8	26.541	237	0	12.839	17006000	0	0	0	0	0	0	0	0	0	0	0	0	0	0	0	0	0	0	0	0	0	0	0	0	0	0	0	0	0	0	0	13268000	2919200	818530	0	0	0	0
P33401;P37012	Phosphoglucomutase 1	PGM1	sp|P33401|PGM1_YEAST Phosphoglucomutase 1 OS=Saccharomyces cerevisiae (strain ATCC 204508 / S288c) GN=PGM1 PE=1 SV=1	2	5	10.2	63.111	570	0	27.043	81860000	0	0	0	0	0	0	0	0	0	0	0	0	0	0	0	0	0	0	0	0	0	6537200	56176000	0	2897200	0	723010	0	672810	0	1785500	1259600	0	796000	0	0	10318000	693730
Q08208	Nucleolar protein 12	NOP12	sp|Q08208|NOP12_YEAST Nucleolar protein 12 OS=Saccharomyces cerevisiae (strain ATCC 204508 / S288c) GN=NOP12 PE=1 SV=1	1	12	27.9	51.941	459	0	171.64	443760000	0	0	0	0	0	0	0	0	0	0	0	0	0	0	0	0	0	0	0	0	165410	0	153200000	195300000	77701000	6869900	1792300	667980	3713400	3230200	0	0	0	759280	0	0	0	365430
Q06512	Nucleolar complex protein 4	NOC4	sp|Q06512|NOC4_YEAST Nucleolar complex protein 4 OS=Saccharomyces cerevisiae (strain ATCC 204508 / S288c) GN=NOC4 PE=1 SV=1	1	13	25.9	63.636	552	0	323.31	840540000	1268300	0	813340	0	0	0	0	0	0	0	0	0	0	0	0	0	6248200	3929900	0	0	0	1537600	809180000	634550	2174000	0	6473800	0	4382400	0	0	0	0	707880	0	0	0	0
P32524	Pre-mRNA-splicing factor PRP21	PRP21	sp|P32524|PRP21_YEAST Pre-mRNA-splicing factor PRP21 OS=Saccharomyces cerevisiae (strain ATCC 204508 / S288c) GN=PRP21 PE=1 SV=1	1	4	13.9	33.052	280	0	16.967	275900000	0	0	0	0	0	0	0	0	13013000	0	0	0	0	0	0	0	0	0	0	0	0	0	0	0	0	0	0	0	73348000	700240	5896000	0	0	656160	0	0	182290000	0
P38255	Transcriptional regulatory protein RXT2	RXT2	sp|P38255|RXT2_YEAST Transcriptional regulatory protein RXT2 OS=Saccharomyces cerevisiae (strain ATCC 204508 / S288c) GN=RXT2 PE=1 SV=2	1	10	27.2	48.629	430	0	323.31	627720000	0	0	0	0	0	0	0	0	1452600	0	0	0	0	0	0	1014600	0	0	0	0	0	0	0	4000700	581830000	1250200	584040	1907600	1861600	6359900	1060600	3200400	0	594540	0	6240700	14288000	0
P53622	Coatomer subunit alpha	COP1	sp|P53622|COPA_YEAST Coatomer subunit alpha OS=Saccharomyces cerevisiae (strain ATCC 204508 / S288c) GN=COP1 PE=1 SV=2	1	3	2	135.61	1201	0	5.4306	133580000	0	70424000	0	0	0	1889300	0	0	0	0	0	0	0	0	0	0	0	0	0	0	1227400	0	0	0	0	0	0	4925900	0	0	0	0	0	542700	0	19248000	14344000	20980000
Q03956	Regulator of V-ATPase in vacuolar membrane protein 2	RAV2	sp|Q03956|RAV2_YEAST Regulator of V-ATPase in vacuolar membrane protein 2 OS=Saccharomyces cerevisiae (strain ATCC 204508 / S288c) GN=RAV2 PE=1 SV=1	1	2	7.1	40.017	351	0	8.9341	19200000	0	0	0	0	0	0	0	0	0	0	0	0	0	0	0	0	0	0	0	0	0	0	0	0	0	0	18719000	0	0	0	0	0	0	480870	0	0	0	0
Q08096	RNA 3-terminal phosphate cyclase-like protein	RCL1	sp|Q08096|RCL1_YEAST RNA 3-terminal phosphate cyclase-like protein OS=Saccharomyces cerevisiae (strain ATCC 204508 / S288c) GN=RCL1 PE=1 SV=1	1	12	36	40.17	367	0	323.31	2342400000	0	0	3494600	4012200	2126200	1255900	1492600	33976000	1773200	0	0	0	0	0	2512700	0	4444900	2585400	0	0	0	0	553990	11380000	5453600	205650000	1924900000	32324000	34461000	0	21248000	3190000	7203500	476770	0	0	6249300	659060
Q00362	Protein phosphatase PP2A regulatory subunit B	CDC55	sp|Q00362|2ABA_YEAST Protein phosphatase PP2A regulatory subunit B OS=Saccharomyces cerevisiae (strain ATCC 204508 / S288c) GN=CDC55 PE=1 SV=2	1	8	16.9	59.661	526	0	108.66	210260000	0	467840	0	0	0	0	0	0	0	0	0	0	0	0	0	4397900	0	0	0	808310	0	0	173950000	0	0	0	0	0	0	983760	9941300	3857000	0	426850	0	0	15428000	0
P36131	DASH complex subunit SPC34	SPC34	sp|P36131|SPC34_YEAST DASH complex subunit SPC34 OS=Saccharomyces cerevisiae (strain ATCC 204508 / S288c) GN=SPC34 PE=1 SV=1	1	9	35.9	34.077	295	0	84.706	779450000	0	0	0	0	0	0	0	0	90448000	0	0	0	0	0	0	0	0	0	0	0	16777000	0	2834800	0	0	0	0	0	474930000	182990000	0	1953100	1993400	275630	0	2326000	1850100	0
P38711;P35997	40S ribosomal protein S27-B;40S ribosomal protein S27-A	RPS27B;RPS27A	sp|P38711|RS27B_YEAST 40S ribosomal protein S27-B OS=Saccharomyces cerevisiae (strain ATCC 204508 / S288c) GN=RPS27B PE=1 SV=1;sp|P35997|RS27_YEAST 40S ribosomal protein S27-A OS=Saccharomyces cerevisiae (strain ATCC 204508 / S288c) GN=RPS27A PE=1 SV=1	2	3	37.8	8.8653	82	0	12.164	899490000	1276400	4723200	5229100	0	1147000	0	0	1190100	734030	0	0	0	0	5684800	0	0	0	0	0	1962100	1526700	0	0	0	5026500	4402900	12137000	646810000	12020000	15097000	0	4146500	7194400	0	0	1322700	47692000	13393000
P36516	54S ribosomal protein L3, mitochondrial	MRPL3	sp|P36516|RM03_YEAST 54S ribosomal protein L3, mitochondrial OS=Saccharomyces cerevisiae (strain ATCC 204508 / S288c) GN=MRPL3 PE=1 SV=2	1	10	27.9	43.999	390	0	148.72	1501600000	0	0	0	0	0	0	0	0	0	0	0	0	0	0	13591000	802740000	20187000	27229000	11518000	14108000	632510	13323000	9985700	3281200	14713000	0	66817000	458820000	40773000	0	0	0	0	0	0	0	3881500	0
P22434	3,5-cyclic-nucleotide phosphodiesterase 1	PDE1	sp|P22434|PDE1_YEAST 3,5-cyclic-nucleotide phosphodiesterase 1 OS=Saccharomyces cerevisiae (strain ATCC 204508 / S288c) GN=PDE1 PE=1 SV=2	1	7	20.6	42.016	369	0	56.311	874230000	0	0	0	0	0	0	0	3047700	3965600	0	0	0	0	0	0	874480	0	0	0	0	0	0	5558200	0	14313000	7244900	418380000	386230000	29383000	2010700	0	3220300	0	0	0	0	0	0
Q01217	Protein ARG5,6, mitochondrial;N-acetyl-gamma-glutamyl-phosphate reductase;Acetylglutamate kinase	ARG5,6	sp|Q01217|ARG56_YEAST Protein ARG5,6, mitochondrial OS=Saccharomyces cerevisiae (strain ATCC 204508 / S288c) GN=ARG5,6 PE=1 SV=1	1	5	5.9	94.868	863	0	102.92	385200000	0	0	0	0	0	0	0	0	0	0	0	0	0	0	0	0	0	0	0	0	0	0	0	0	0	0	75869000	303750000	0	1485600	0	4094700	0	0	0	0	0	0
P38251	Replication factor C subunit 5	RFC5	sp|P38251|RFC5_YEAST Replication factor C subunit 5 OS=Saccharomyces cerevisiae (strain ATCC 204508 / S288c) GN=RFC5 PE=1 SV=1	1	6	23.2	39.941	354	0	281.29	1395100000	0	0	0	0	0	1283100	0	3525400	5778000	0	0	0	0	0	0	0	0	0	972450	1609300	3305700	0	0	0	0	0	1059200000	234440000	52116000	10381000	0	0	0	0	0	0	22444000	0
Q12524	Peroxisomal coenzyme A diphosphatase 1, peroxisomal	PCD1	sp|Q12524|PCD1_YEAST Peroxisomal coenzyme A diphosphatase 1, peroxisomal OS=Saccharomyces cerevisiae (strain ATCC 204508 / S288c) GN=PCD1 PE=1 SV=1	1	7	22.6	39.754	340	0	17.342	243220000	0	0	0	0	2136700	0	0	0	828310	0	0	0	0	0	0	0	0	0	0	0	0	7950400	0	0	1019000	0	28241000	136980000	57186000	0	0	0	4935000	0	0	0	3948400	0
P36534	54S ribosomal protein L40, mitochondrial	MRPL40	sp|P36534|RM40_YEAST 54S ribosomal protein L40, mitochondrial OS=Saccharomyces cerevisiae (strain ATCC 204508 / S288c) GN=MRPL40 PE=1 SV=2	1	4	13.5	33.751	297	0	15.234	316840000	0	3382600	0	0	0	0	0	0	0	0	0	0	0	2810000	0	0	0	0	0	0	0	0	0	0	0	0	178740000	123690000	0	1762400	0	3780400	0	0	0	0	0	0
Q04867	Putative methyltransferase YMR310C		sp|Q04867|YM91_YEAST Putative methyltransferase YMR310C OS=Saccharomyces cerevisiae (strain ATCC 204508 / S288c) GN=YMR310C PE=1 SV=1	1	4	12.9	35.852	317	0	45.977	172780000	0	0	0	0	0	0	2062000	495410	12135000	0	0	0	0	1790200	4226600	0	3024000	1847000	0	0	5325100	0	0	0	0	0	6256400	114850000	19171000	1598300	0	0	0	0	0	0	0	0
Q00955	Acetyl-CoA carboxylase;Biotin carboxylase	ACC1	sp|Q00955|ACAC_YEAST Acetyl-CoA carboxylase OS=Saccharomyces cerevisiae (strain ATCC 204508 / S288c) GN=ACC1 PE=1 SV=2	1	17	8.5	250.35	2233	0	60.611	431050000	0	0	0	0	5976400	23980000	0	0	0	0	0	0	0	0	199110000	20898000	5925800	480520	889120	0	0	0	2621200	0	0	12458000	9772700	112690000	9267100	16370000	0	0	0	0	0	0	9451500	0
P43639	Casein kinase II subunit beta	CKB1	sp|P43639|CSK2B_YEAST Casein kinase II subunit beta OS=Saccharomyces cerevisiae (strain ATCC 204508 / S288c) GN=CKB1 PE=1 SV=1	1	5	15.1	32.264	278	0	90.99	802960000	0	0	0	0	0	0	0	0	45527000	0	0	0	0	0	0	1448500	2226400	0	3821200	0	12588000	5796400	9526400	0	0	0	2380700	103540000	531300000	76043000	0	2483000	0	0	0	4367200	0	0
P10080	Single-stranded nucleic acid-binding protein	SBP1	sp|P10080|SSBP1_YEAST Single-stranded nucleic acid-binding protein OS=Saccharomyces cerevisiae (strain ATCC 204508 / S288c) GN=SBP1 PE=1 SV=2	1	7	25.9	32.989	294	0	81.99	386480000	0	0	0	0	1322400	0	0	12479000	0	0	0	0	0	0	0	0	0	0	0	0	0	1486100	3400000	0	0	149150000	59672000	93849000	10986000	46589000	0	1398300	1721200	0	0	0	0	0
P38230	Probable quinone oxidoreductase	ZTA1	sp|P38230|QOR_YEAST Probable quinone oxidoreductase OS=Saccharomyces cerevisiae (strain ATCC 204508 / S288c) GN=ZTA1 PE=1 SV=1	1	5	17.7	37.018	334	0	34.101	89067000	0	0	0	0	0	0	0	0	0	0	0	0	0	0	0	0	0	0	0	0	0	329060	0	0	0	0	3045200	84552000	984500	0	0	0	0	0	0	0	0	156190
P39926	Protein SSO2	SSO2	sp|P39926|SSO2_YEAST Protein SSO2 OS=Saccharomyces cerevisiae (strain ATCC 204508 / S288c) GN=SSO2 PE=1 SV=2	1	8	31.5	33.733	295	0	323.31	2670600000	0	0	0	0	0	0	0	8334500	3175600	0	0	0	0	0	0	0	0	0	0	0	0	0	0	0	0	11640000	2431000000	68154000	139810000	8505400	0	0	0	0	0	0	0	0
P36100	Transcription initiation factor IIE subunit alpha	TFA1	sp|P36100|T2EA_YEAST Transcription initiation factor IIE subunit alpha OS=Saccharomyces cerevisiae (strain ATCC 204508 / S288c) GN=TFA1 PE=1 SV=1	1	5	12	54.741	482	0	17.772	164810000	0	0	0	0	0	0	0	598560	0	0	0	0	0	0	0	0	0	0	923090	0	0	19464000	0	0	0	3739700	26534000	67344000	2111000	0	25809000	16507000	0	0	0	1784200	0	0
P08524	Farnesyl pyrophosphate synthase	ERG20	sp|P08524|FPPS_YEAST Farnesyl pyrophosphate synthase OS=Saccharomyces cerevisiae (strain ATCC 204508 / S288c) GN=ERG20 PE=1 SV=2	1	4	11.6	40.483	352	0	21.238	4070100000	14606000	14885000	11589000	0	0	560900000	0	10288000	3799400	0	0	0	0	0	0	1134600	4818800	297680000	0	0	0	0	0	0	0	823980000	1173900000	62060000	7898000	0	0	1080400000	0	0	0	2173200	0	0
P29295;P39962	Casein kinase I homolog HRR25	HRR25	sp|P29295|HRR25_YEAST Casein kinase I homolog HRR25 OS=Saccharomyces cerevisiae (strain ATCC 204508 / S288c) GN=HRR25 PE=1 SV=1	2	10	23.5	57.339	494	0	109.16	315410000	0	0	0	0	0	0	6937100	0	0	0	0	0	0	0	0	0	0	0	0	0	0	0	0	40940000	93531000	9001900	4701300	60315000	15608000	75496000	0	0	0	0	0	0	4289100	4591900
P38115	D-arabinose dehydrogenase [NAD(P)+] heavy chain	ARA1	sp|P38115|ARA1_YEAST D-arabinose dehydrogenase [NAD(P)+] heavy chain OS=Saccharomyces cerevisiae (strain ATCC 204508 / S288c) GN=ARA1 PE=1 SV=1	1	7	26.5	38.883	344	0	30.377	372050000	0	0	0	0	0	0	0	0	0	0	0	0	0	0	0	0	2290700	0	0	0	27234000	8193100	3927500	0	0	26206000	121140000	52109000	3600700	0	0	0	0	0	0	784640	126570000	0
Q07913	Non-structural maintenance of chromosomes element 1	NSE1	sp|Q07913|NSE1_YEAST Non-structural maintenance of chromosomes element 1 OS=Saccharomyces cerevisiae (strain ATCC 204508 / S288c) GN=NSE1 PE=1 SV=1	1	2	6	38.334	336	0	6.425	74982000	0	0	0	444400	0	0	0	0	0	0	0	0	0	0	0	0	0	0	0	0	0	0	0	0	0	0	17487000	50455000	6596200	0	0	0	0	0	0	0	0	0
P47120	Deoxyhypusine hydroxylase	LIA1	sp|P47120|DOHH_YEAST Deoxyhypusine hydroxylase OS=Saccharomyces cerevisiae (strain ATCC 204508 / S288c) GN=LIA1 PE=1 SV=1	1	5	18.5	36.164	325	0	14.596	125980000	0	0	0	0	5247000	0	0	0	6644400	0	0	0	0	0	0	0	0	0	0	0	0	0	0	0	2188100	0	44256000	50090000	14271000	0	0	0	0	0	0	0	1529500	1750700
P32458	Cell division control protein 11	CDC11	sp|P32458|CDC11_YEAST Cell division control protein 11 OS=Saccharomyces cerevisiae (strain ATCC 204508 / S288c) GN=CDC11 PE=1 SV=1	1	5	13.7	47.648	415	0	49.902	227980000	1070500	0	0	1722100	0	0	0	1148900	443320	0	0	0	0	0	0	0	0	0	0	0	0	0	0	0	103270000	2751000	51210000	48772000	11174000	0	480490	0	3700900	0	0	0	2232000	0
Q12461	Serine/threonine-protein phosphatase 2A activator 2	RRD2	sp|Q12461|PTPA2_YEAST Serine/threonine-protein phosphatase 2A activator 2 OS=Saccharomyces cerevisiae (strain ATCC 204508 / S288c) GN=RRD2 PE=1 SV=1	1	2	4.7	41.452	358	0.00067751	2.5812	85682000	0	0	0	0	0	0	0	0	0	0	0	0	0	0	0	0	0	0	0	0	0	0	0	0	0	0	15923000	47106000	9609200	0	8784100	0	0	0	0	0	0	0
P38803	Pre-rRNA-processing protein IPI1	IPI1	sp|P38803|IPI1_YEAST Pre-rRNA-processing protein IPI1 OS=Saccharomyces cerevisiae (strain ATCC 204508 / S288c) GN=IPI1 PE=1 SV=1	1	4	17.1	37.866	334	0	61.098	141010000	0	0	0	0	0	0	0	0	0	0	0	0	0	0	0	0	0	0	0	0	0	0	9987700	0	0	0	74986000	43491000	1734000	9790700	0	0	0	0	0	0	1021400	0
Q06188	PWWP domain-containing protein YLR455W	YLR455W	sp|Q06188|YL455_YEAST PWWP domain-containing protein YLR455W OS=Saccharomyces cerevisiae (strain ATCC 204508 / S288c) GN=YLR455W PE=1 SV=1	1	4	14.1	35.508	304	0	12.191	64257000	0	0	0	0	0	0	0	0	0	0	0	0	0	0	0	0	0	0	0	0	0	0	0	0	0	0	0	42950000	15185000	881610	3278900	0	0	0	0	1962200	0	0
Q12291	25S rRNA (uridine(2843)-N(3))-methyltransferase	BMT6	sp|Q12291|BMT6_YEAST 25S rRNA (uridine(2843)-N(3))-methyltransferase OS=Saccharomyces cerevisiae (strain ATCC 204508 / S288c) GN=BMT6 PE=1 SV=1	1	3	8.5	42.041	365	0	71.371	53895000	0	0	0	0	0	0	867880	0	0	0	0	0	0	0	184040	0	0	0	0	0	800220	0	0	0	0	6914800	0	42359000	1531800	0	0	0	0	0	0	0	0	1236900
P36160	Ribosome biogenesis protein RPF2	RPF2	sp|P36160|RPF2_YEAST Ribosome biogenesis protein RPF2 OS=Saccharomyces cerevisiae (strain ATCC 204508 / S288c) GN=RPF2 PE=1 SV=1	1	6	17.7	39.598	344	0	57.239	755410000	0	0	0	0	24334000	296670000	25488000	710610	0	0	0	0	0	0	11442000	15653000	0	0	0	0	22278000	14383000	13895000	0	0	208890000	10086000	39279000	11340000	31870000	22696000	4645000	0	0	0	0	1754200	0
P47016	Probable hydrolase NIT2	NIT2	sp|P47016|NIT2_YEAST Probable hydrolase NIT2 OS=Saccharomyces cerevisiae (strain ATCC 204508 / S288c) GN=NIT2 PE=1 SV=1	1	3	9.8	34.692	307	0	4.8298	268110000	0	0	1243900	1475500	40404000	41837000	0	0	9623800	0	0	0	0	0	0	17460000	0	15150000	0	0	0	0	0	26781000	0	0	0	37251000	49288000	27592000	0	0	0	0	0	0	0	0
P32608	Retrograde regulation protein 2	RTG2	sp|P32608|RTG2_YEAST Retrograde regulation protein 2 OS=Saccharomyces cerevisiae (strain ATCC 204508 / S288c) GN=RTG2 PE=1 SV=2	1	6	10.4	65.571	588	0	22.547	141060000	0	0	0	0	0	4613400	0	0	2177200	0	0	0	0	0	0	0	0	0	3773800	0	0	86831000	0	7378900	2150900	0	0	27193000	6939500	0	0	0	0	0	0	0	0	0
P53909	Adenine deaminase	AAH1	sp|P53909|ADE_YEAST Adenine deaminase OS=Saccharomyces cerevisiae (strain ATCC 204508 / S288c) GN=AAH1 PE=1 SV=1	1	2	7.2	39.635	347	0	25.525	27715000	0	0	0	0	0	0	0	0	0	0	0	0	0	0	0	0	0	0	0	0	0	0	0	0	0	0	0	27145000	0	0	0	570940	0	0	0	0	0	0
Q04894	NADP-dependent alcohol dehydrogenase 6	ADH6	sp|Q04894|ADH6_YEAST NADP-dependent alcohol dehydrogenase 6 OS=Saccharomyces cerevisiae (strain ATCC 204508 / S288c) GN=ADH6 PE=1 SV=1	1	8	28.3	39.617	360	0	104.21	526970000	0	0	0	2361100	0	0	0	2362300	0	0	0	0	0	0	0	0	0	0	0	0	0	0	0	0	0	147200000	342380000	26245000	0	0	0	6421100	0	0	0	0	0	0
Q00916	U1 small nuclear ribonucleoprotein 70 kDa homolog	SNP1	sp|Q00916|RU17_YEAST U1 small nuclear ribonucleoprotein 70 kDa homolog OS=Saccharomyces cerevisiae (strain ATCC 204508 / S288c) GN=SNP1 PE=1 SV=1	1	2	8	34.447	300	0	21.994	35478000	0	0	0	0	0	0	0	0	0	0	0	0	0	0	0	0	0	0	0	0	3537900	1957800	4381200	0	0	0	0	25601000	0	0	0	0	0	0	0	0	0	0
P43558	Ubiquitin thioesterase OTU1	OTU1	sp|P43558|OTU1_YEAST Ubiquitin thioesterase OTU1 OS=Saccharomyces cerevisiae (strain ATCC 204508 / S288c) GN=OTU1 PE=1 SV=1	1	2	9	33.51	301	0	51.315	32607000	0	0	0	6373000	0	0	0	0	0	0	0	0	0	0	0	0	0	0	0	816430	0	0	0	0	0	0	0	25417000	0	0	0	0	0	0	0	0	0	0
P19454	Casein kinase II subunit alpha	CKA2	sp|P19454|CSK22_YEAST Casein kinase II subunit alpha OS=Saccharomyces cerevisiae (strain ATCC 204508 / S288c) GN=CKA2 PE=1 SV=2	1	9	26.5	39.403	339	0	55.335	395220000	0	0	0	0	1122500	10382000	0	614960	10098000	0	0	0	0	0	0	0	0	0	0	0	0	0	0	5946800	0	0	3897800	24245000	242780000	19374000	0	945720	0	0	0	932530	74873000	0
P32565;P47169	26S proteasome regulatory subunit RPN2	RPN2	sp|P32565|RPN2_YEAST 26S proteasome regulatory subunit RPN2 OS=Saccharomyces cerevisiae (strain ATCC 204508 / S288c) GN=RPN2 PE=1 SV=4	2	27	27.9	104.23	945	0	227.06	1088600000	0	0	0	0	0	31784000	12505000	20171000	0	0	798380	0	0	0	675920	752530000	11202000	21900000	7378800	25148000	9840800	11006000	2742900	6057300	0	98366000	5783600	24145000	4819100	0	6365600	9602300	12916000	0	0	1252400	10030000	0
P25293	Nucleosome assembly protein	NAP1	sp|P25293|NAP1_YEAST Nucleosome assembly protein OS=Saccharomyces cerevisiae (strain ATCC 204508 / S288c) GN=NAP1 PE=1 SV=2	1	3	9.6	47.884	417	0	18.189	102710000	0	0	0	0	0	0	0	0	0	0	0	0	0	0	0	0	0	0	0	0	0	0	0	0	19270000	0	51218000	23230000	0	4173000	4823400	0	0	0	0	0	0	0
P36007	Threo-3-hydroxyaspartate ammonia-lyase	SRY1	sp|P36007|SRY1_YEAST Threo-3-hydroxyaspartate ammonia-lyase OS=Saccharomyces cerevisiae (strain ATCC 204508 / S288c) GN=SRY1 PE=1 SV=1	1	10	40.2	34.899	326	0	70.904	310560000	0	0	560540	3753000	0	0	3443600	0	1156400	0	0	0	0	0	3070200	3047000	8095700	795070	0	0	1631000	0	0	0	0	0	1505000	22245000	205470000	18295000	6292700	885260	0	0	0	2539500	22617000	5165600
P40416	Iron-sulfur clusters transporter ATM1, mitochondrial	ATM1	sp|P40416|ATM1_YEAST Iron-sulfur clusters transporter ATM1, mitochondrial OS=Saccharomyces cerevisiae (strain ATCC 204508 / S288c) GN=ATM1 PE=1 SV=2	1	1	1.2	77.521	690	0.0063452	1.8691	136750000	0	0	0	11687000	7654700	7337000	6107300	2361600	5552200	0	0	0	0	0	8301000	4633900	3788400	7163800	0	2533800	9169900	7948300	11565000	0	5315900	3300400	4614500	21009000	0	3008100	0	0	0	0	0	3696000	0	0
Q99186	AP-2 complex subunit mu	APM4	sp|Q99186|AP2M_YEAST AP-2 complex subunit mu OS=Saccharomyces cerevisiae (strain ATCC 204508 / S288c) GN=APM4 PE=1 SV=1	1	12	25.5	55.387	491	0	74.558	355730000	6128700	0	1148700	5770500	0	4462000	0	0	3603400	0	0	679980	0	0	0	0	1125800	0	36283000	0	4777400	1543600	0	0	179520000	5147800	61693000	19572000	0	4258400	0	1591500	3977200	0	0	0	14447000	0
P25846	DNA mismatch repair protein MSH1, mitochondrial	MSH1	sp|P25846|MSH1_YEAST DNA mismatch repair protein MSH1, mitochondrial OS=Saccharomyces cerevisiae (strain ATCC 204508 / S288c) GN=MSH1 PE=1 SV=2	1	3	3.1	109.41	959	0	3.0221	42850000	0	0	0	0	0	0	0	0	0	0	0	0	0	0	0	9430700	0	0	0	0	0	0	0	0	0	0	0	18060000	3151600	11518000	0	0	0	0	0	0	690270	0
P38764	26S proteasome regulatory subunit RPN1	RPN1	sp|P38764|RPN1_YEAST 26S proteasome regulatory subunit RPN1 OS=Saccharomyces cerevisiae (strain ATCC 204508 / S288c) GN=RPN1 PE=1 SV=3	1	8	9	109.49	993	0	128.43	503850000	0	0	4736500	0	0	5143500	0	0	0	0	0	0	0	0	1690600	3548600	2950700	2243700	0	0	0	0	0	0	1772600	2585600	0	17516000	269100000	79773000	100590000	8793000	0	0	0	3410500	0	0
Q12182	Uncharacterized protein YOR342C		sp|Q12182|YO342_YEAST Uncharacterized protein YOR342C OS=Saccharomyces cerevisiae (strain ATCC 204508 / S288c) GN=YOR342C PE=1 SV=1	1	1	3.4	36.907	319	0	10.271	27106000	0	0	0	0	0	0	0	1062600	6761600	0	0	0	0	0	0	0	1330400	0	0	0	0	0	0	0	0	0	0	16738000	0	1213600	0	0	0	0	0	0	0	0
P32356;P35172	Neutral trehalase	NTH1	sp|P32356|TREA_YEAST Neutral trehalase OS=Saccharomyces cerevisiae (strain ATCC 204508 / S288c) GN=NTH1 PE=1 SV=3	2	19	26.2	85.878	751	0	104.4	578710000	0	0	0	0	0	42293000	0	0	935270	0	0	0	0	0	0	2788800	11343000	270960000	111740000	9438500	34250000	20045000	8404200	9571900	1738200	1511500	16407000	16634000	1345900	1394000	1345300	2529300	0	0	0	0	14038000	0
P38707	Asparagine--tRNA ligase, cytoplasmic	DED81	sp|P38707|SYNC_YEAST Asparagine--tRNA ligase, cytoplasmic OS=Saccharomyces cerevisiae (strain ATCC 204508 / S288c) GN=DED81 PE=1 SV=1	1	14	29.2	62.206	554	0	323.31	551780000	0	0	0	0	0	0	0	3152500	0	0	0	0	0	0	5537700	0	1453500	1517500	0	0	0	366990000	26953000	0	21420000	11280000	62064000	16603000	1247600	2070000	2684300	18135000	5788800	0	0	0	837380	0
P36069	Probable phosphomutase PMU1	PMU1	sp|P36069|PMU1_YEAST Probable phosphoglycerate mutase PMU1 OS=Saccharomyces cerevisiae (strain ATCC 204508 / S288c) GN=PMU1 PE=1 SV=1	1	7	30.8	33.776	295	0	26.532	212060000	0	0	0	0	944020	0	1847300	0	0	0	0	0	0	0	0	1329400	3197600	2507600	1592800	1345600	4222400	0	4859500	0	0	0	0	16539000	69619000	93528000	0	0	0	0	0	0	10529000	0
P45978	Protein SCD6	SCD6	sp|P45978|SCD6_YEAST Protein SCD6 OS=Saccharomyces cerevisiae (strain ATCC 204508 / S288c) GN=SCD6 PE=1 SV=1	1	4	14	39.189	349	0	20.423	107930000	0	2195100	0	0	0	40799000	0	0	2718900	0	0	0	0	0	0	0	0	0	8242100	0	0	0	0	0	0	0	0	16212000	1241900	16860000	2647200	0	0	0	0	2006100	5646800	9363700
P38063	Ribose-phosphate pyrophosphokinase 4	PRS4	sp|P38063|KPR4_YEAST Ribose-phosphate pyrophosphokinase 4 OS=Saccharomyces cerevisiae (strain ATCC 204508 / S288c) GN=PRS4 PE=1 SV=3	1	7	22.1	35.72	326	0	22.563	199320000	0	0	0	3101300	0	0	0	0	2759900	0	0	0	0	0	0	0	0	0	5952300	0	0	10381000	10549000	0	0	0	18551000	16117000	91927000	36102000	0	0	0	0	0	3883600	0	0
P52920	Cytosolic Fe-S cluster assembly factor NBP35	NBP35	sp|P52920|NBP35_YEAST Cytosolic Fe-S cluster assembly factor NBP35 OS=Saccharomyces cerevisiae (strain ATCC 204508 / S288c) GN=NBP35 PE=1 SV=1	1	1	3	35.253	328	0.0013441	2.4627	21655000	0	0	0	1569500	0	0	0	0	0	0	0	0	0	0	0	0	0	0	0	0	0	0	0	0	0	0	0	15736000	0	2665800	0	1683000	0	0	0	0	0	0
P53111	NADPH-dependent aldehyde reductase ARI1	ARI1	sp|P53111|ARI1_YEAST NADPH-dependent aldehyde reductase ARI1 OS=Saccharomyces cerevisiae (strain ATCC 204508 / S288c) GN=ARI1 PE=1 SV=1	1	7	27.4	38.083	347	0	121.56	398150000	0	0	0	0	11509000	0	0	0	2610200	0	0	0	0	0	24755000	0	10791000	0	0	0	21232000	5242800	0	17584000	0	24823000	227150000	15485000	0	1217600	9351900	0	0	0	0	1552100	24846000	0
P25044	Tyrosine-protein phosphatase 1	PTP1	sp|P25044|PTP1_YEAST Tyrosine-protein phosphatase 1 OS=Saccharomyces cerevisiae (strain ATCC 204508 / S288c) GN=PTP1 PE=1 SV=1	1	2	6.3	38.868	335	0	6.4305	56515000	0	0	0	0	0	0	0	0	0	0	0	0	0	0	0	0	0	0	0	0	0	0	0	0	0	0	41266000	15248000	0	0	0	0	0	0	0	0	0	0
Q06494	Putative pyridoxal reductase	YPR127W	sp|Q06494|PLR1_YEAST Putative pyridoxal reductase OS=Saccharomyces cerevisiae (strain ATCC 204508 / S288c) GN=YPR127W PE=1 SV=1	1	2	6.1	38.6	345	0	2.8259	56471000	0	0	0	0	0	0	0	0	1261400	0	0	0	0	0	0	0	0	0	0	0	0	973860	0	0	0	0	3060900	14347000	14797000	9797500	0	0	0	0	0	10430000	1804300	0
P39714	(R,R)-butanediol dehydrogenase	BDH1	sp|P39714|BDH1_YEAST (R,R)-butanediol dehydrogenase OS=Saccharomyces cerevisiae (strain ATCC 204508 / S288c) GN=BDH1 PE=1 SV=2	1	11	34.8	41.582	382	0	298.98	1817400000	3705400	0	0	0	0	0	0	42579000	0	0	0	2263700	0	0	0	0	6825100	0	0	0	2929600	13597000	7291700	0	7298300	1340400000	324190000	13210000	9235300	2690800	2450800	4876200	12935000	0	0	0	19267000	0
P06787	Calmodulin	CMD1	sp|P06787|CALM_YEAST Calmodulin OS=Saccharomyces cerevisiae (strain ATCC 204508 / S288c) GN=CMD1 PE=1 SV=1	1	7	58.5	16.135	147	0	323.31	2288900000	0	1579700000	2680600	0	1468300	3821500	6451300	0	0	0	0	0	0	1746000	0	0	0	1492800	0	0	4835000	0	2561200	0	0	0	0	12673000	0	0	0	0	2343100	0	0	0	49120000	620040000
P04037	Cytochrome c oxidase subunit 4, mitochondrial	COX4	sp|P04037|COX4_YEAST Cytochrome c oxidase subunit 4, mitochondrial OS=Saccharomyces cerevisiae (strain ATCC 204508 / S288c) GN=COX4 PE=1 SV=1	1	3	28.4	17.142	155	0	4.8419	66861000	0	8112500	0	0	0	0	0	0	0	0	0	0	0	0	0	3713200	0	0	0	0	0	0	0	0	0	0	0	12281000	0	0	0	0	0	0	0	0	7824500	34931000
P28789	Porphobilinogen deaminase	HEM3	sp|P28789|HEM3_YEAST Porphobilinogen deaminase OS=Saccharomyces cerevisiae (strain ATCC 204508 / S288c) GN=HEM3 PE=1 SV=1	1	2	8	36.674	327	0	3.6242	21283000	0	0	0	0	0	0	0	0	0	0	0	0	761380	547370	0	0	0	829330	0	0	0	0	0	0	0	0	4973100	12150000	2021500	0	0	0	0	0	0	0	0	0
Q12052	Trimethylguanosine synthase	TGS1	sp|Q12052|TGS1_YEAST Trimethylguanosine synthase OS=Saccharomyces cerevisiae (strain ATCC 204508 / S288c) GN=TGS1 PE=1 SV=1	1	5	18.1	36.527	315	0	17.45	278760000	0	0	0	3573300	0	0	0	0	31944000	0	0	0	0	0	0	0	0	0	0	1630200	0	0	0	0	3907900	0	1169400	11597000	192440000	29227000	0	868120	0	0	0	503990	1901400	0
P53228	Transaldolase NQM1	NQM1	sp|P53228|TAL2_YEAST Transaldolase NQM1 OS=Saccharomyces cerevisiae (strain ATCC 204508 / S288c) GN=NQM1 PE=1 SV=1	1	6	20.4	37.253	333	0	29.228	146380000	0	0	0	0	0	0	0	0	0	0	0	0	0	0	0	0	0	0	0	0	0	1351200	0	0	0	0	125320000	11309000	6563900	1834600	0	0	0	0	0	0	0	0
[truncated: 629 more rows]
[truncated: 125 more columns]
