# Supplementary figures and images for: Dedicated chaperones coordinate co-translational regulation of ribosomal protein production with ribosome assembly to preserve proteostasis
Source: eLife journal article supplement (doi:10.7554/elife.74255), 2022-02-24

# Figure 2B - source data

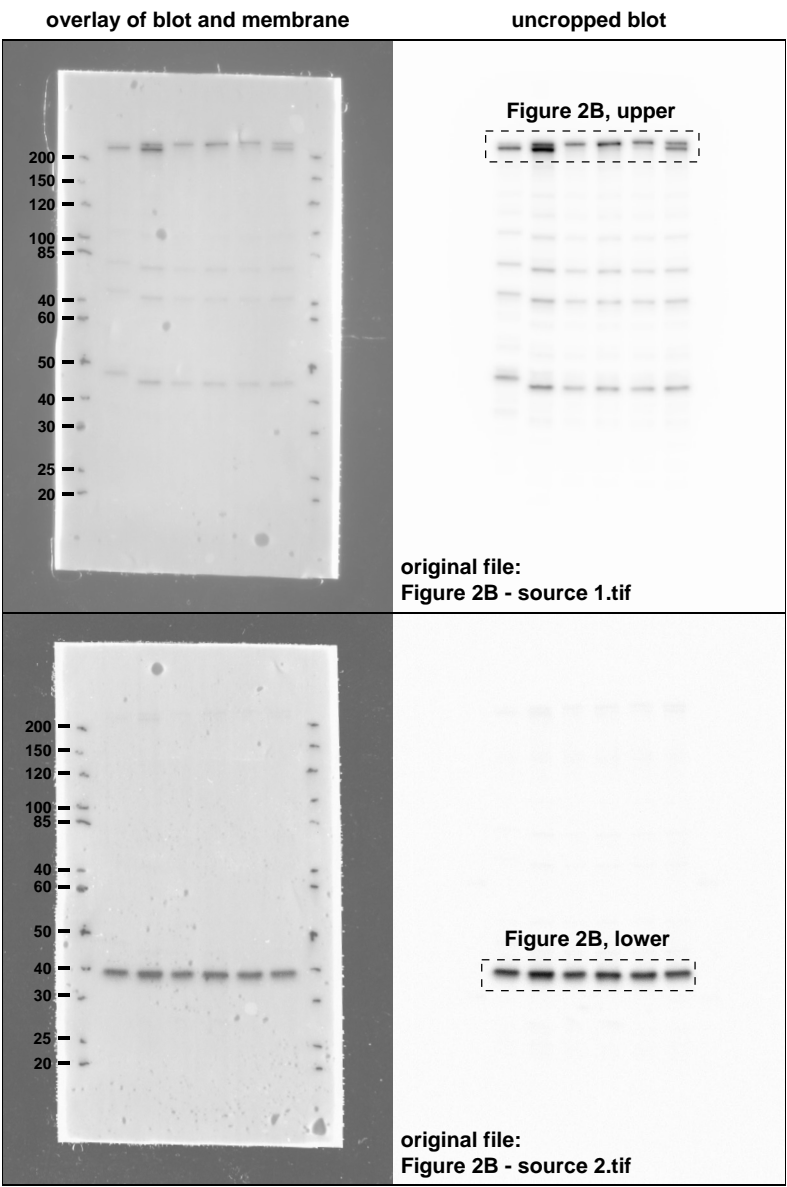

Supplement: fig2-data1 [file elife-74255-fig2-data1-v1.zip]

# Figure 3AB - source data

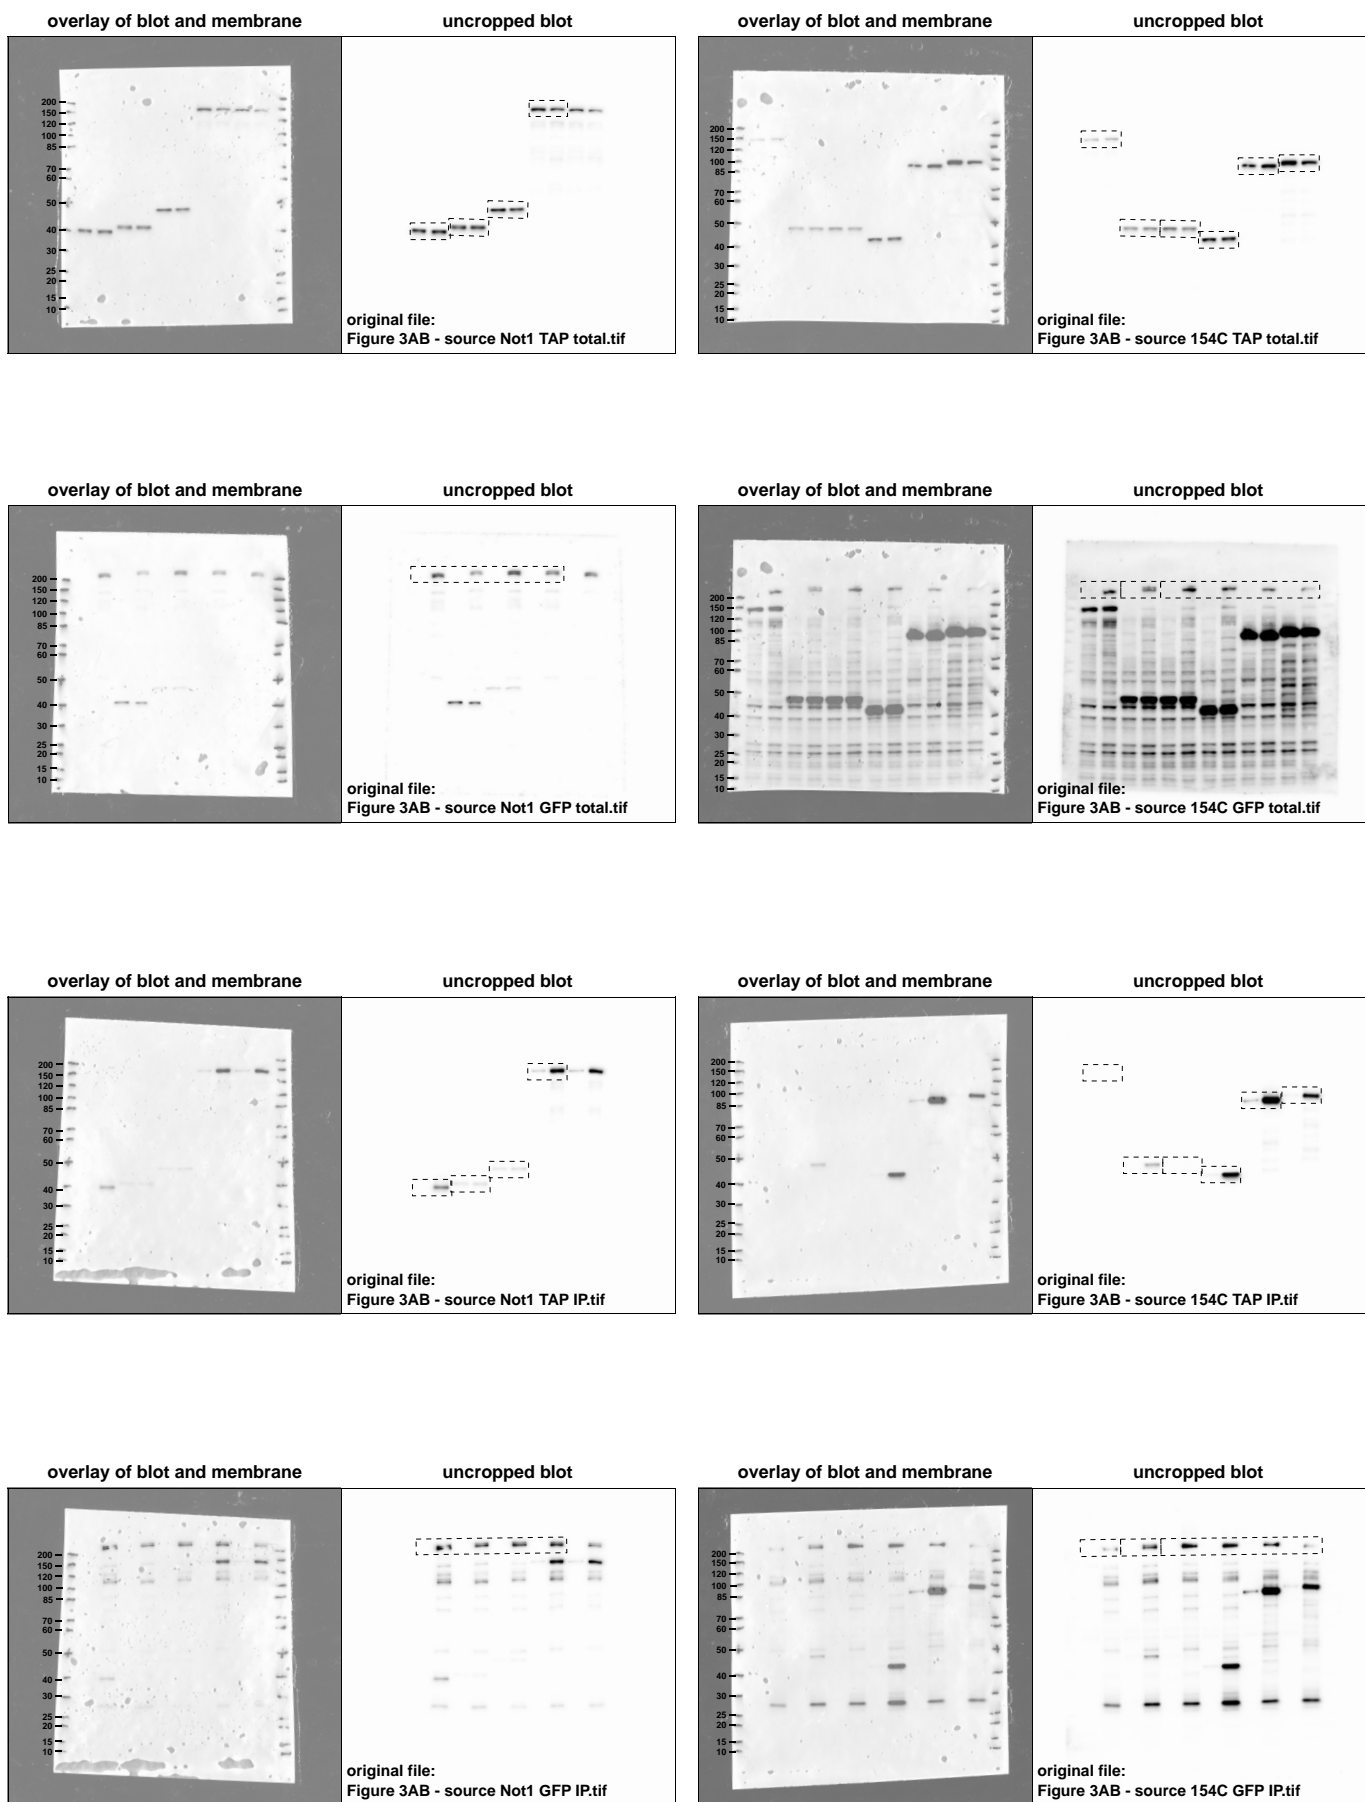

Supplement: fig3-data1 [file elife-74255-fig3-data1-v1.zip]

# Figure 3C - source data

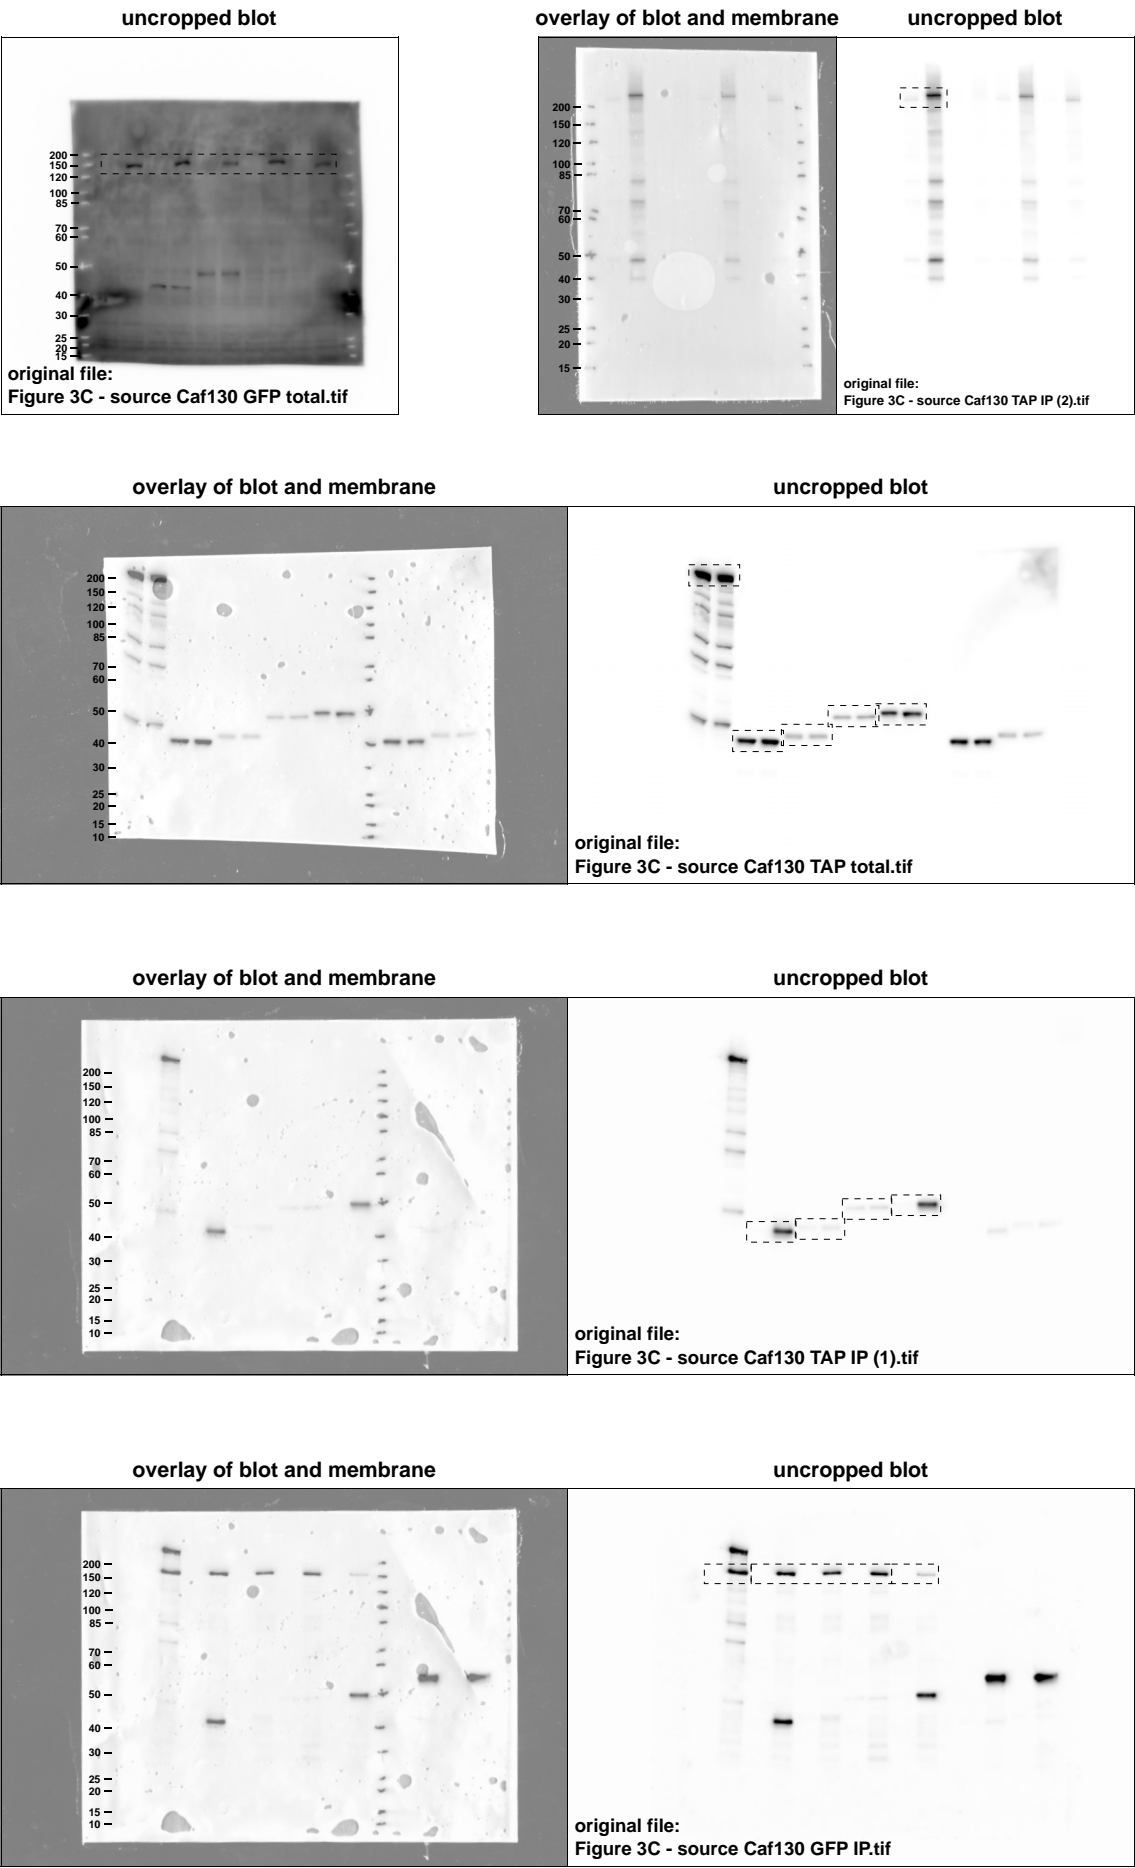

Supplement: fig3-data2 [file elife-74255-fig3-data2-v1.zip]

# Figure 3D - source data

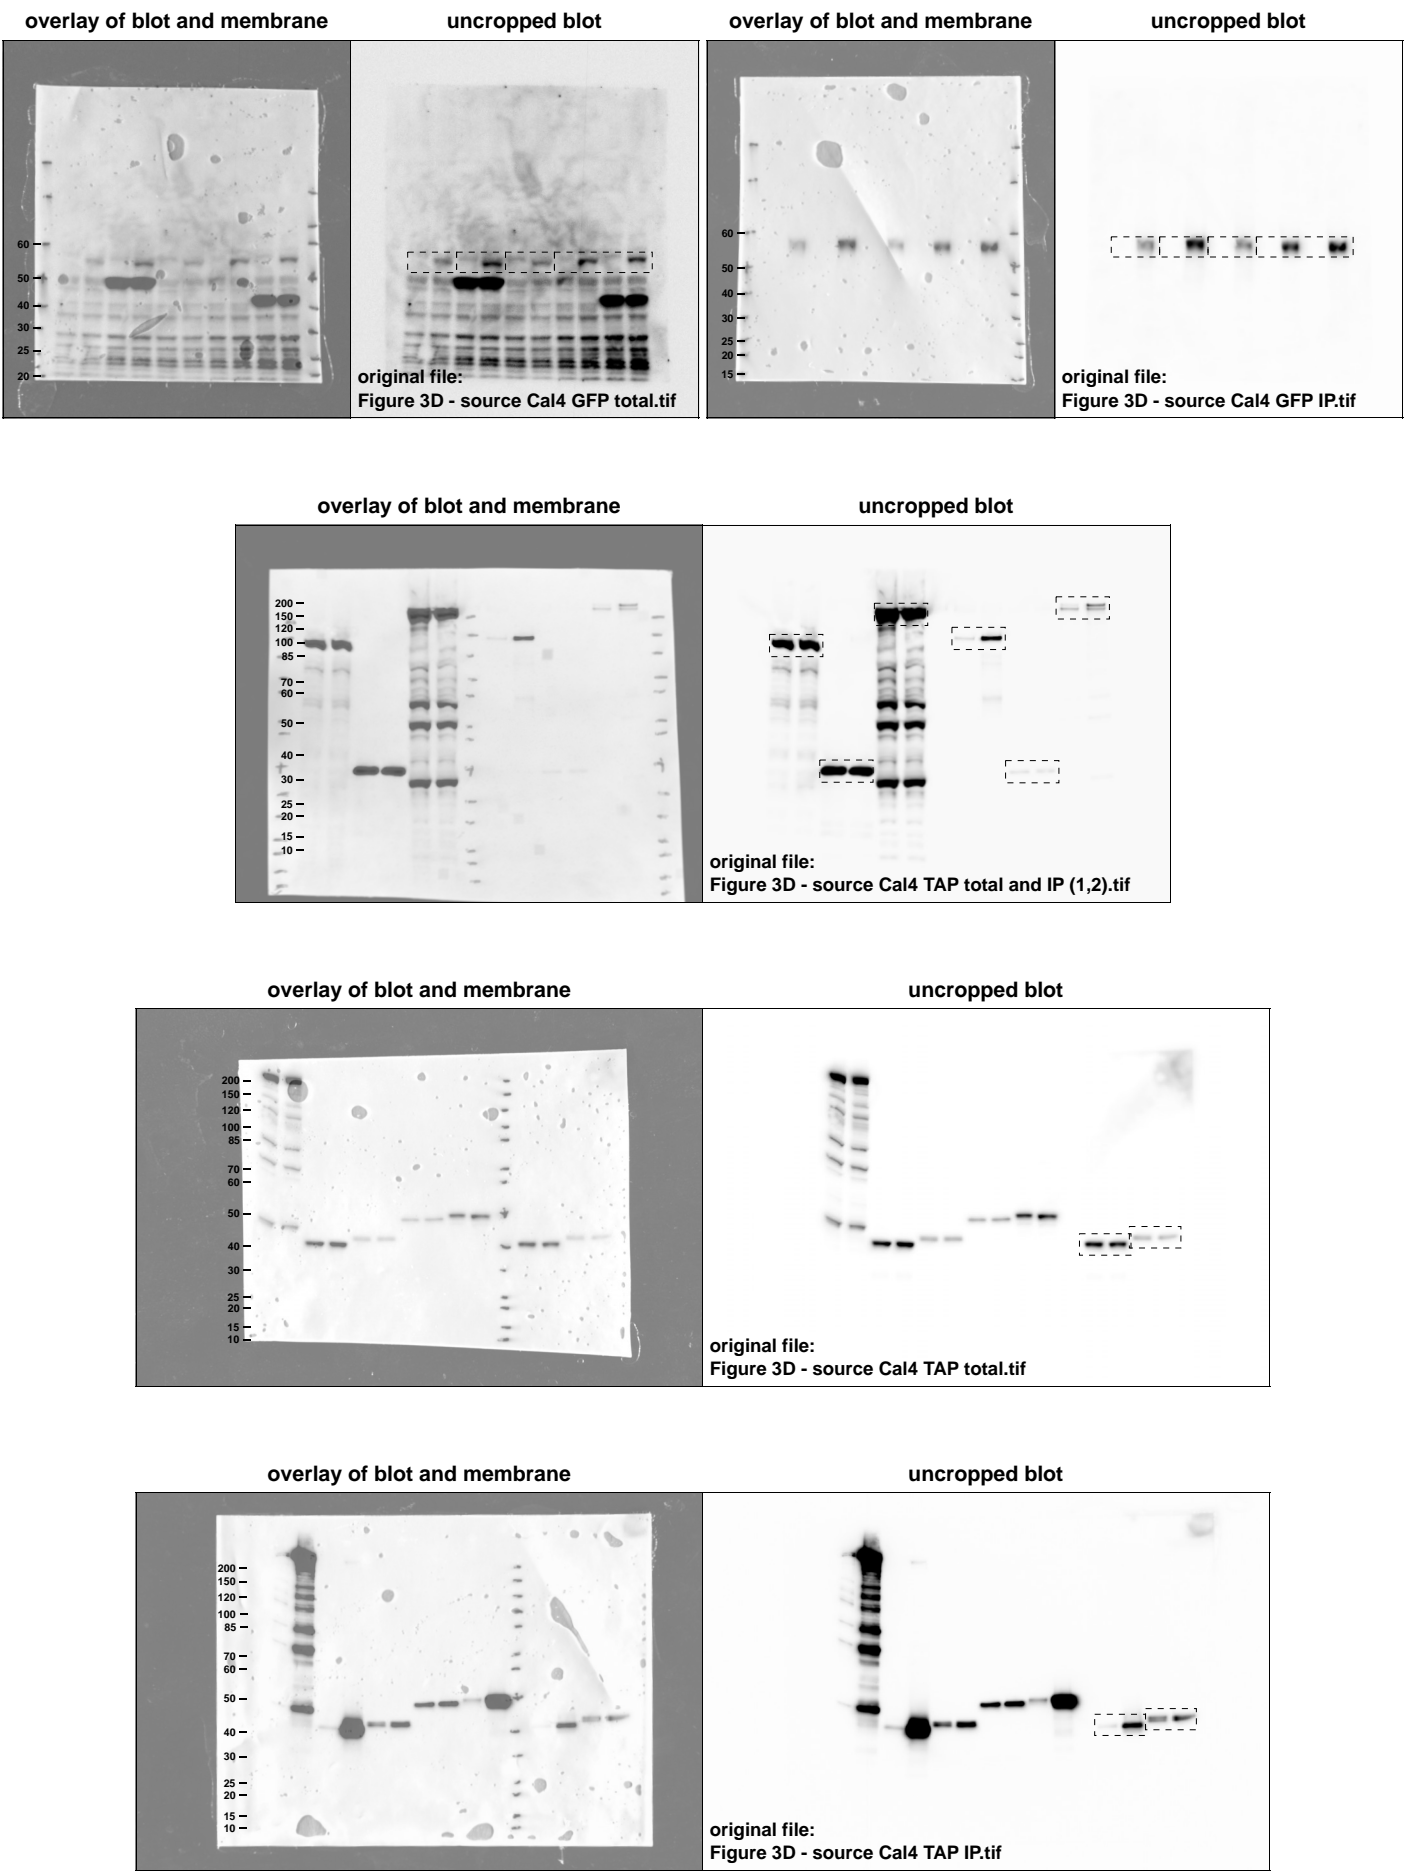

Supplement: fig3-data3 [file Figure 3D - source data.pdf › Figure 3D - source data.pdf]

# Figure 3E - source data

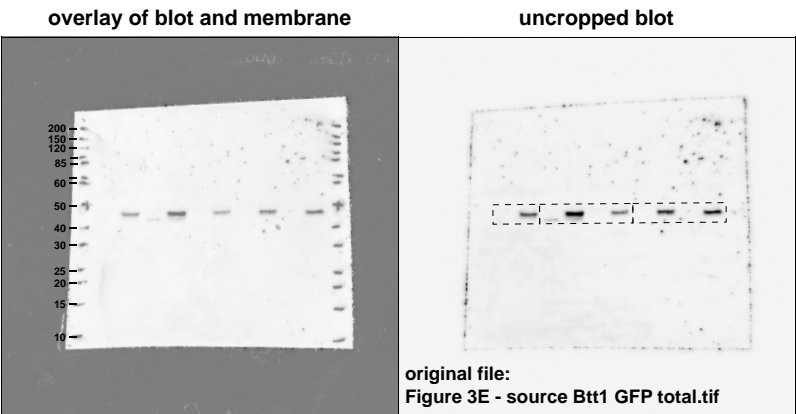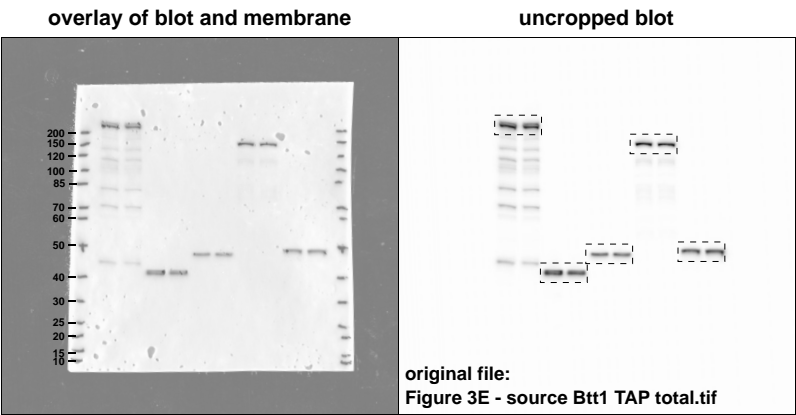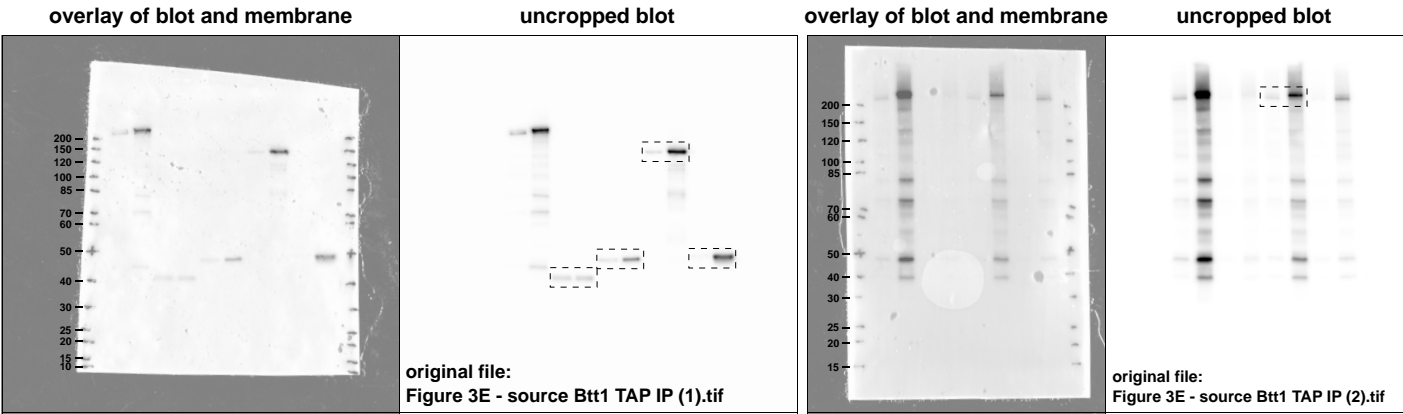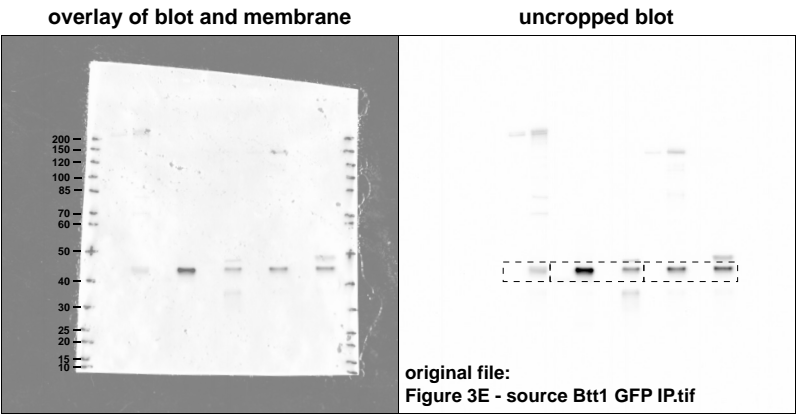

Supplement: fig3-data4 [file elife-74255-fig3-data4-v1.zip]

# Figure 7-S2A - source data

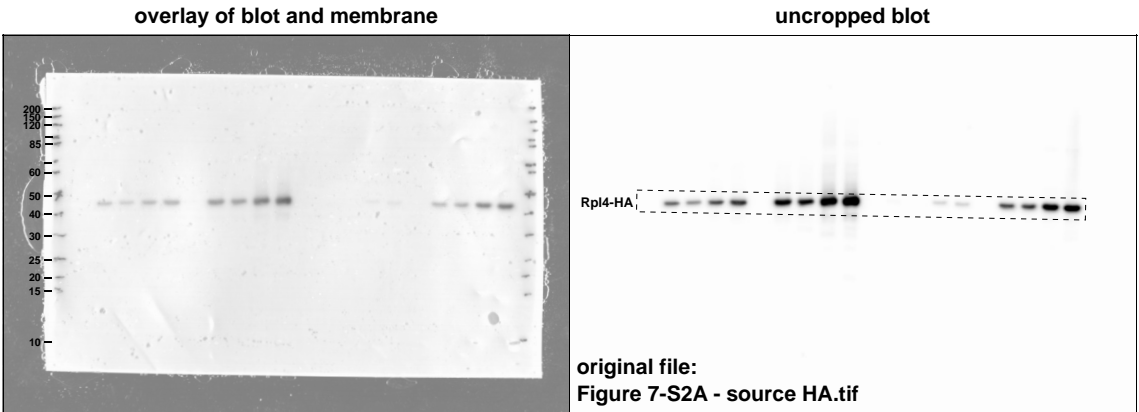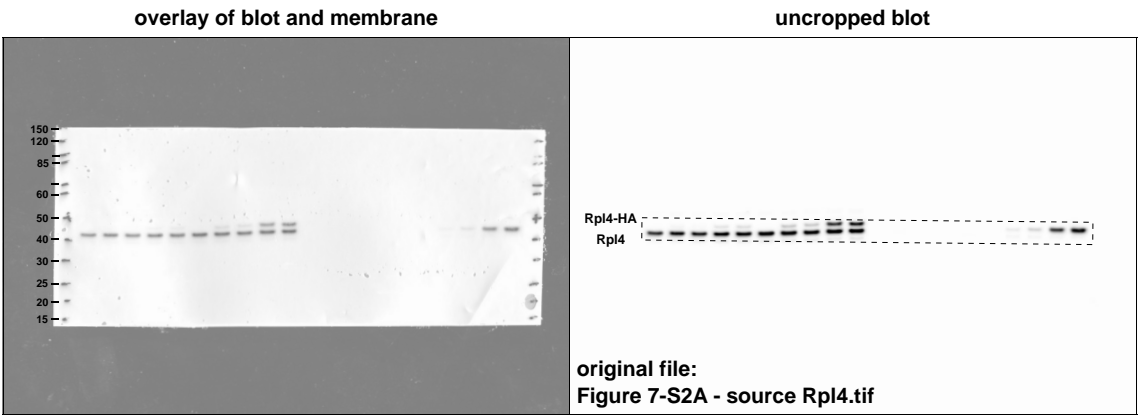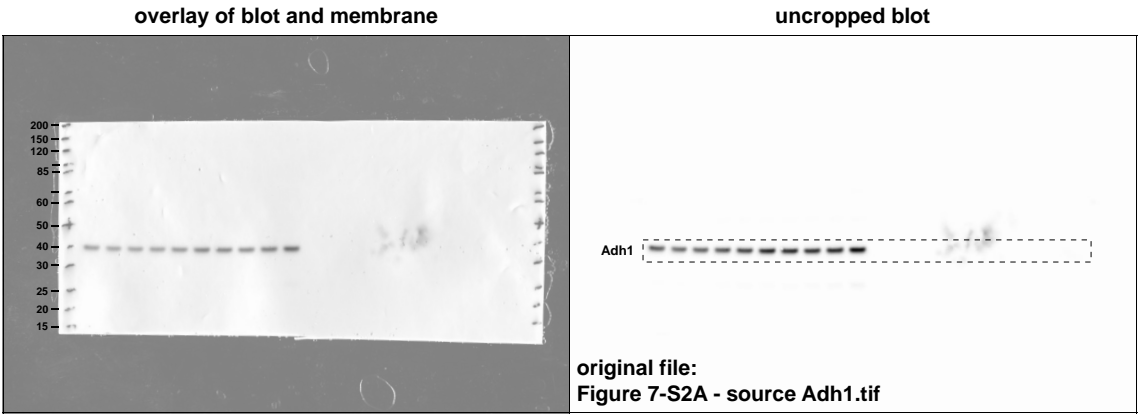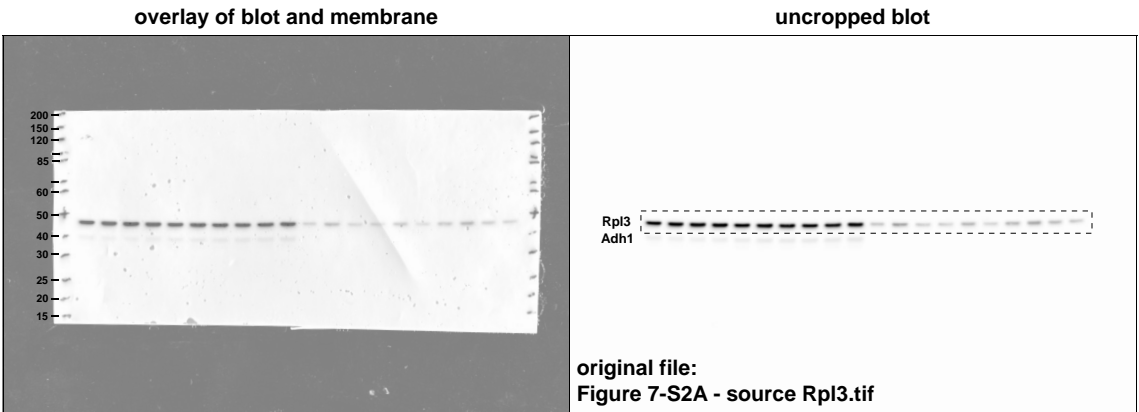

Supplement: fig7-figsupp2-data1 [file elife-74255-fig7-figsupp2-data1-v1.zip]

# Figure 7-S2B (total extract) - source data

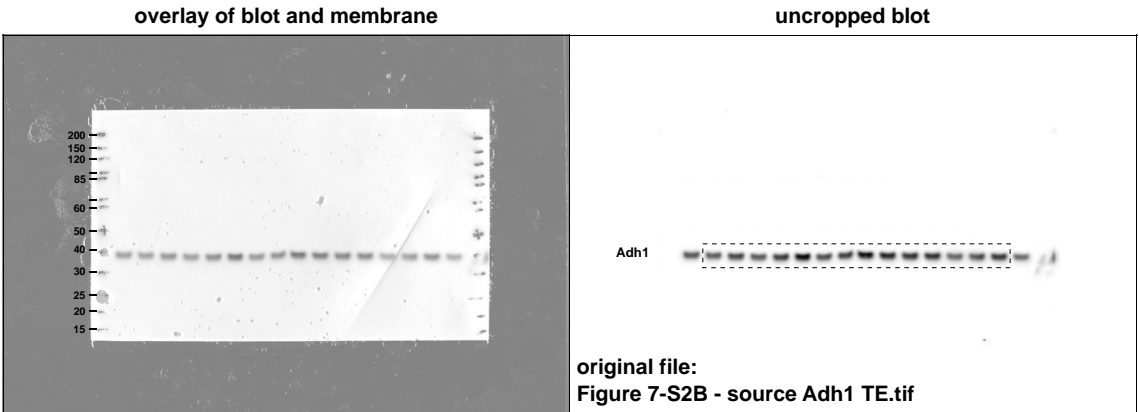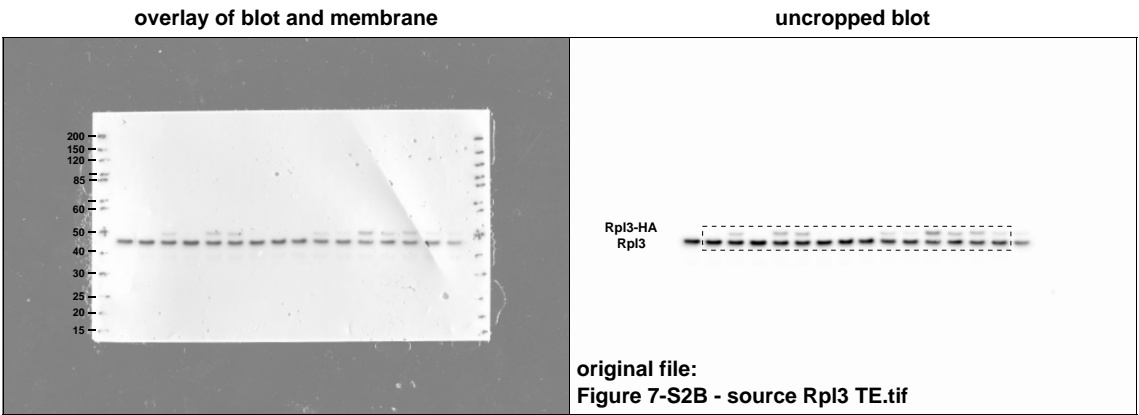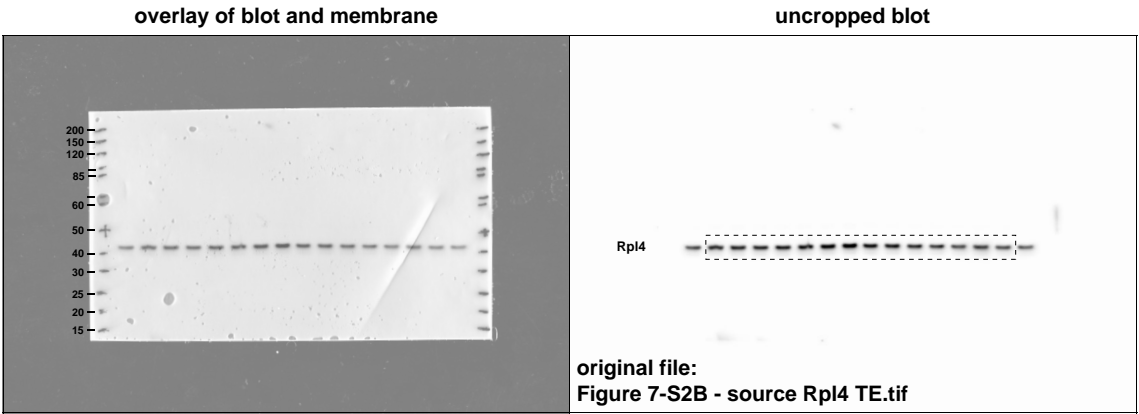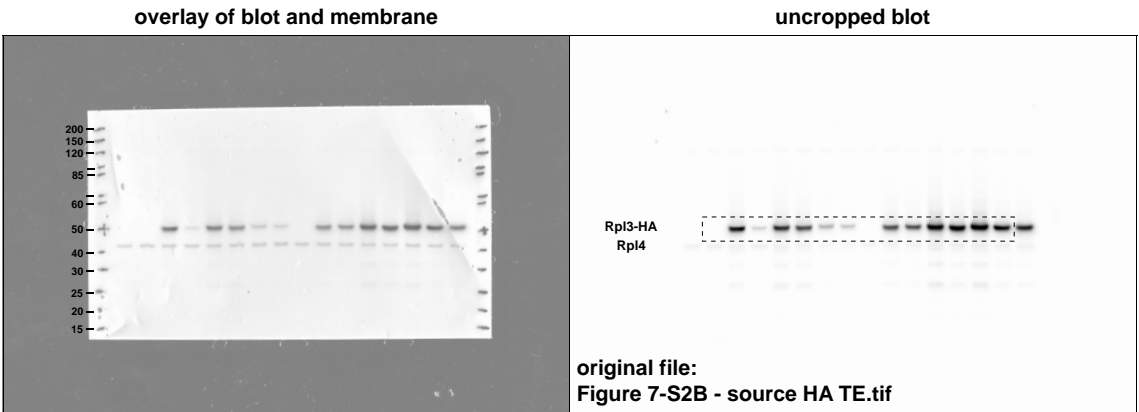

# Figure 7-S2B (pellet) - source data

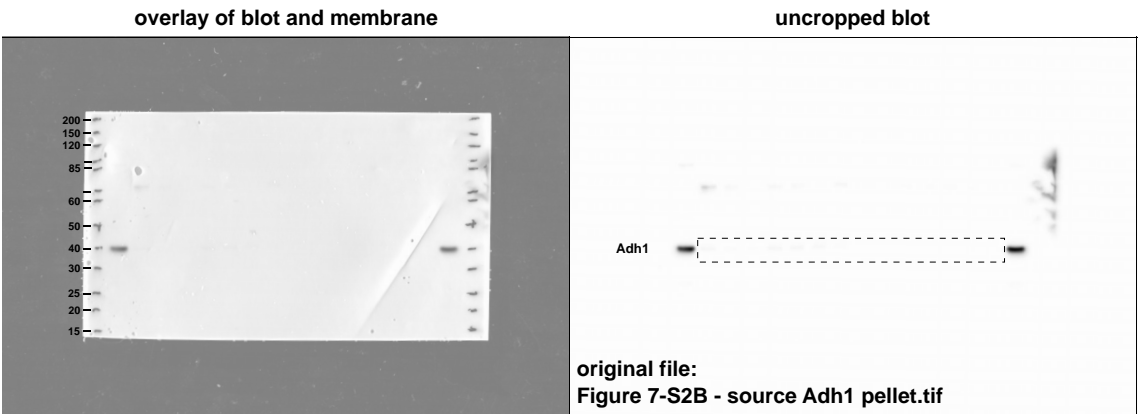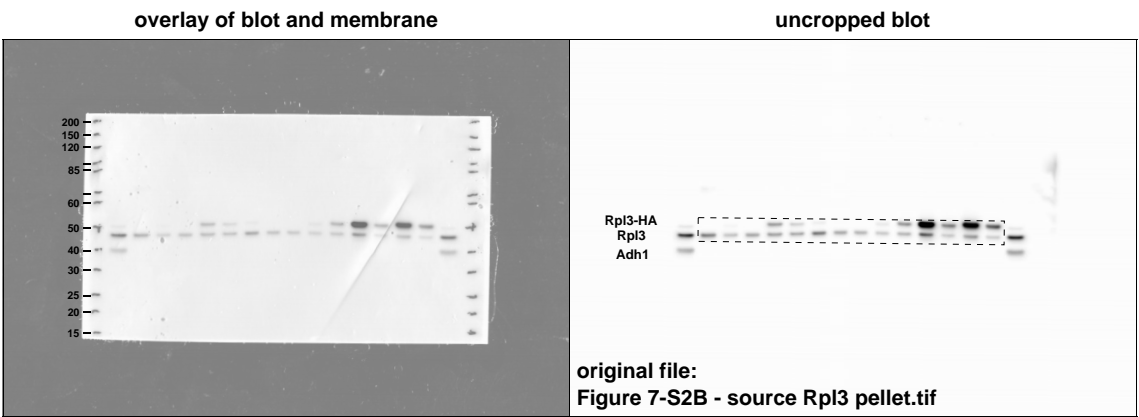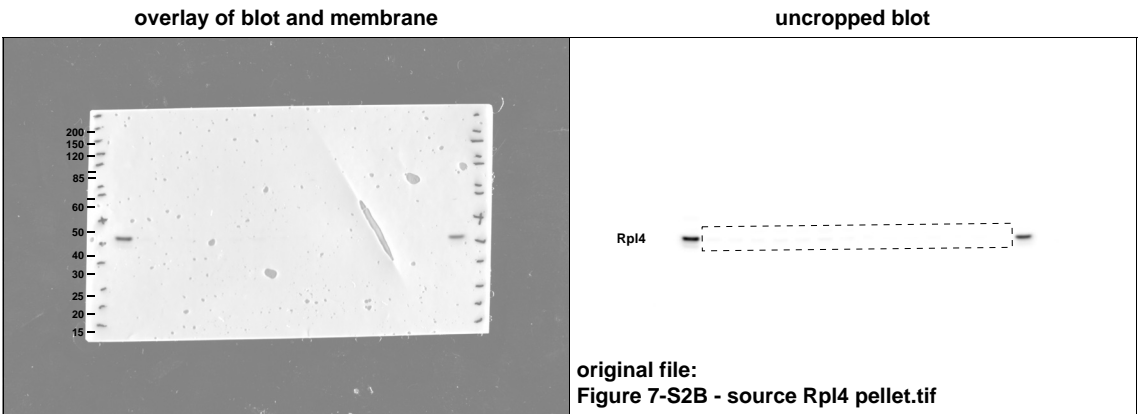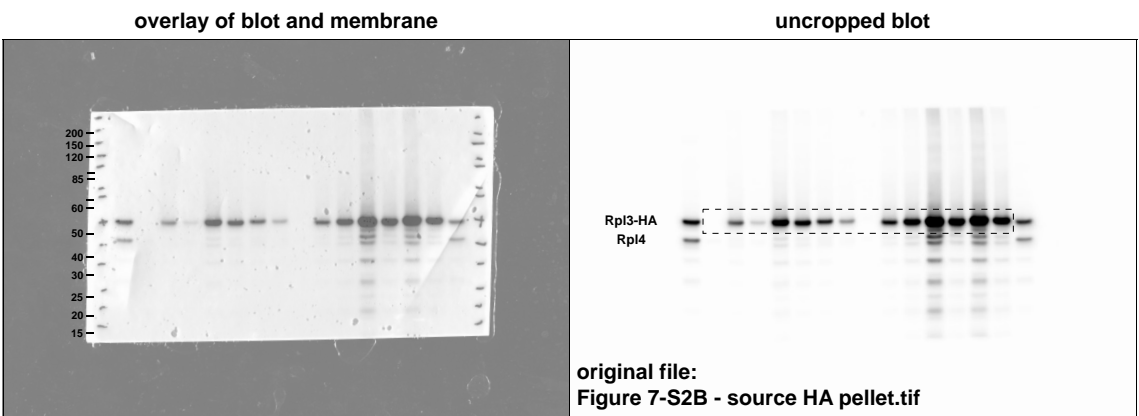

Supplement: fig7-figsupp2-data2 [file elife-74255-fig7-figsupp2-data2-v1.zip]

# Figure 7-S4 - source data

uncropped coomassie gel, original file: Figure 7-S4 - source.JPG

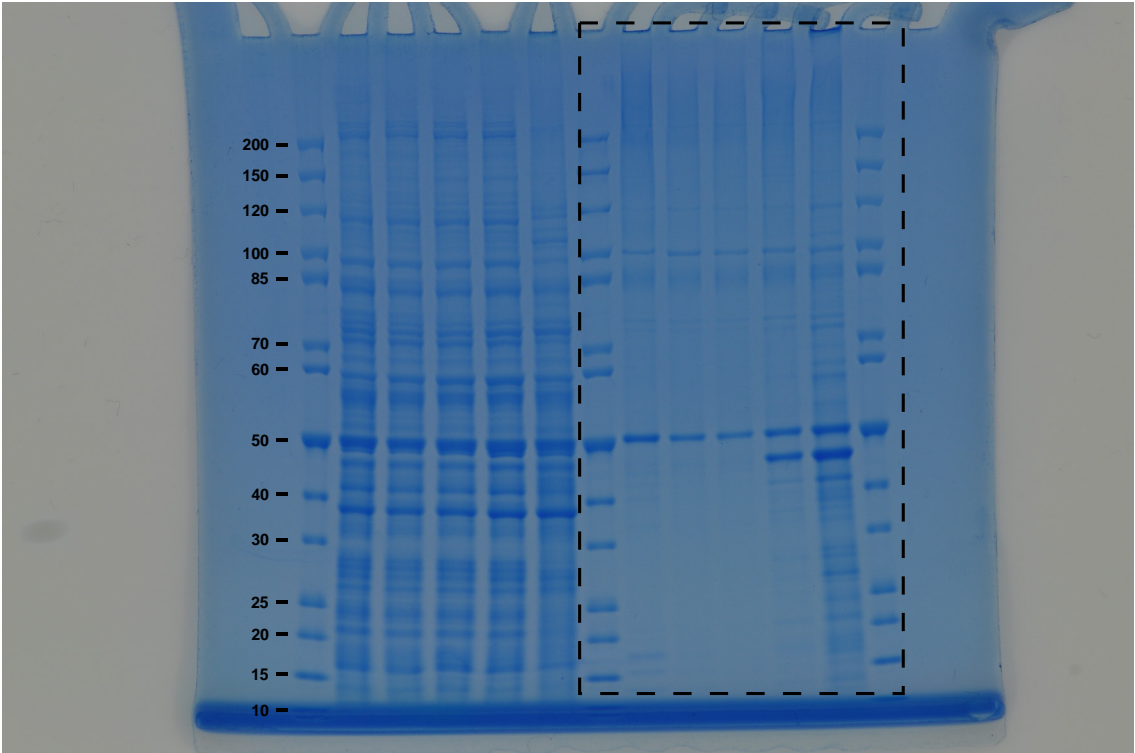

Supplement: fig7-figsupp4-data1 [file elife-74255-fig7-figsupp4-data1-v1.zip]
